# Supplementary material for: Adipocyte NR1D1 dictates adipose tissue expansion during obesity
Source: eLife journal article supplement (doi:10.7554/elife.63324), 2021-08-05

***Nr1d1*<sup>Flox2-6</sup>: Normal chow (252, 279, 280, 288)**  
x10 magnification (bright field and polarised light); 200µm scale bars

**252**

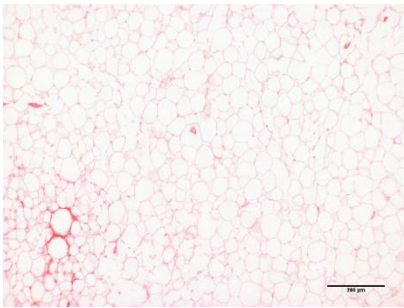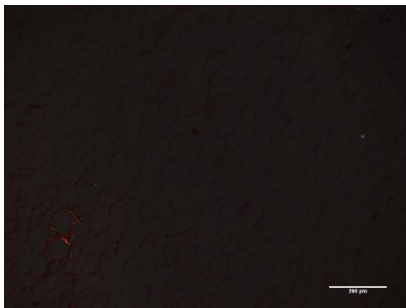

**279**

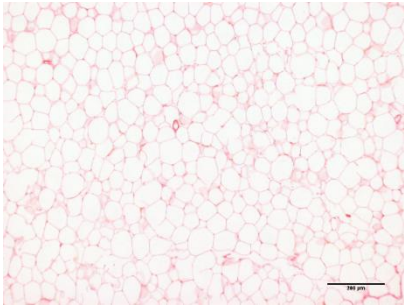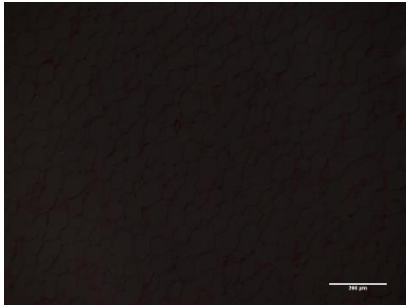

**280**

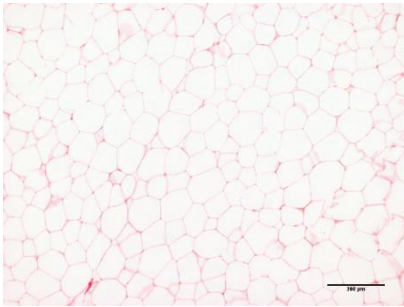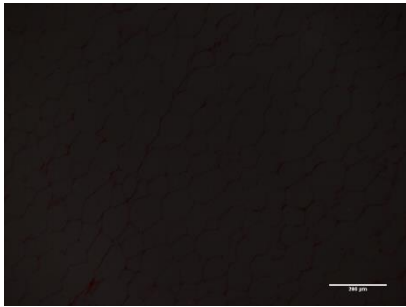

**288**

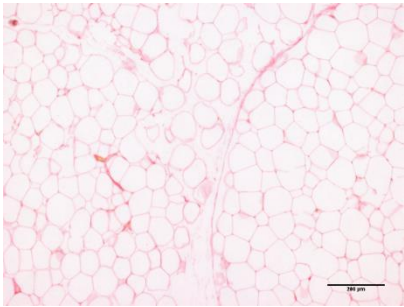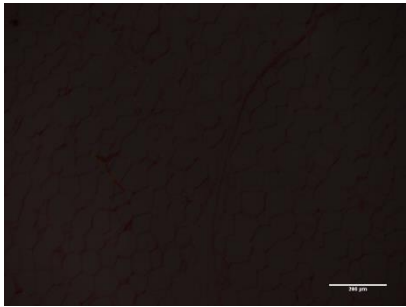

**Nr1d1<sup>Flox2-6</sup> : High Fat Diet (188, 189, 194, 243, 248, 246)**

**188**

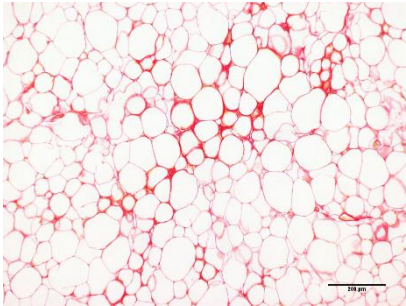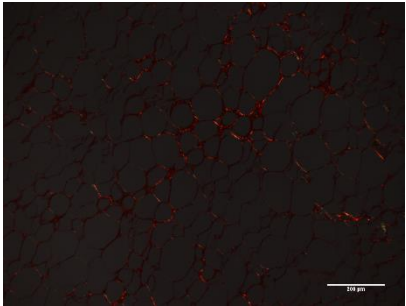

**246**

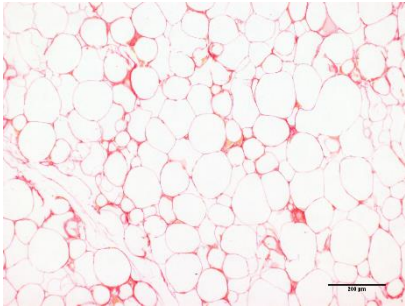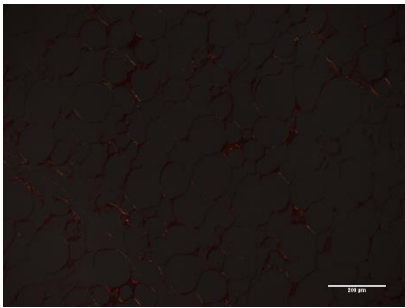

**189**

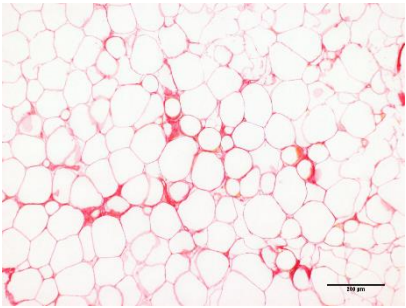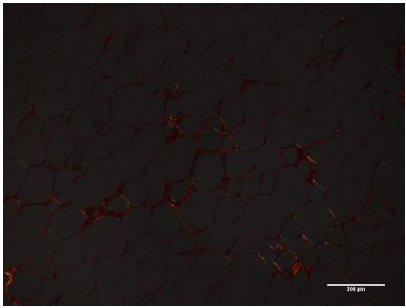

**194**

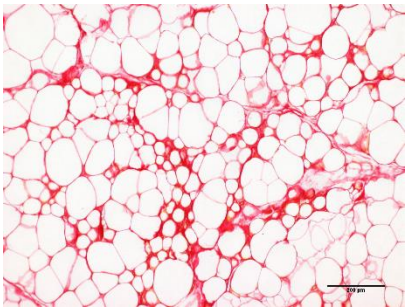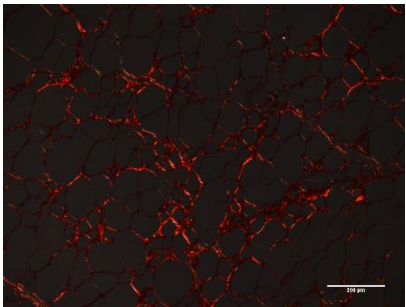

**243**

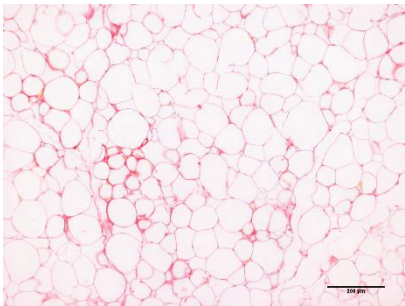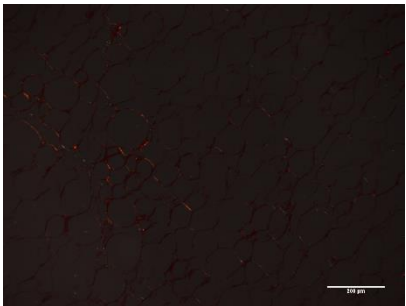

**248**

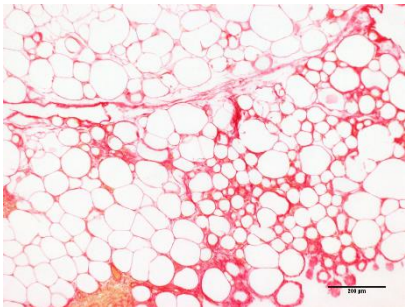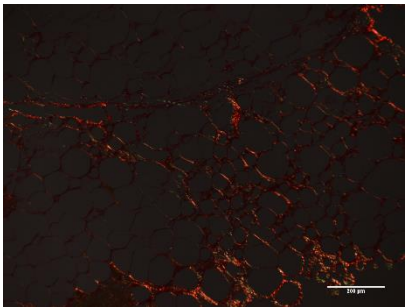

***Nr1d1*<sup>Flox2-6</sup>:*Adipoq*<sup>Cre</sup> : Normal chow (250, 251, 278, 281)**

**250**

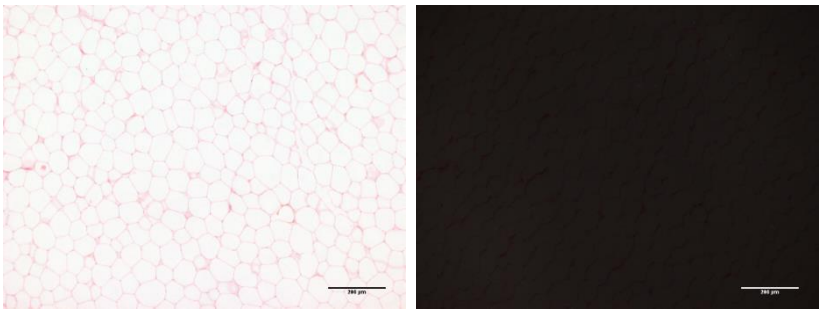

**251**

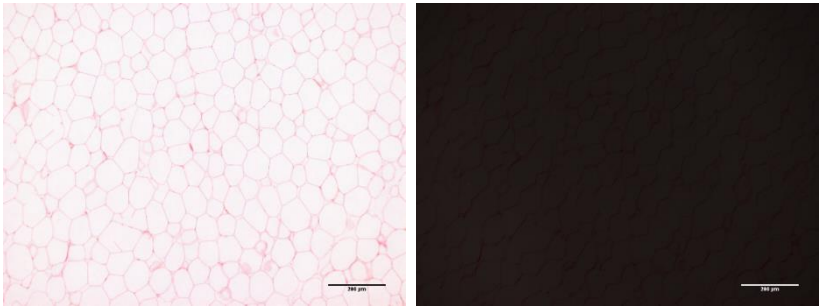

**278**

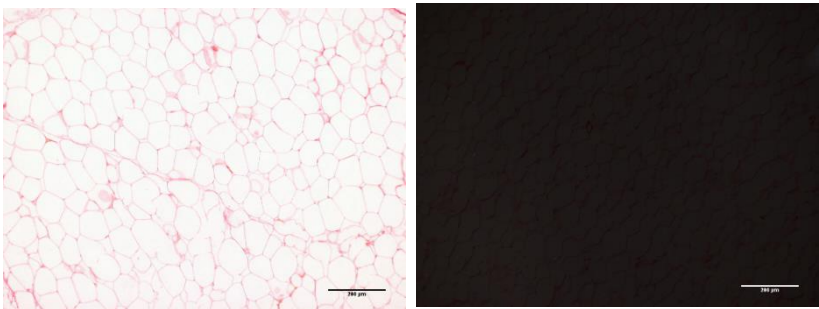

**281**

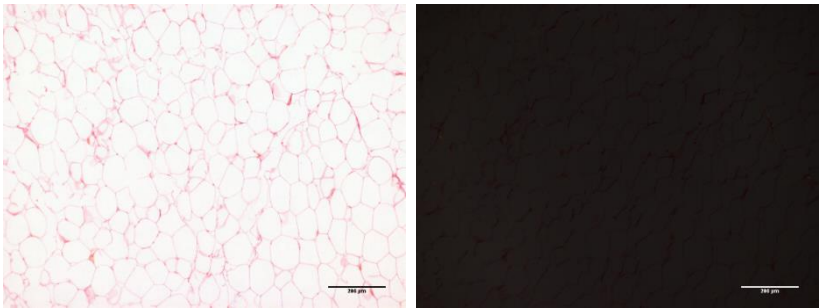



*Nr1d1*<sup>Flox2-6</sup>:*Adipoq*<sup>Cre</sup> : High Fat Diet (195, 196, 197, 238, 240, 239)

195

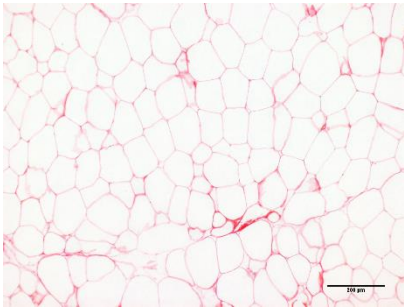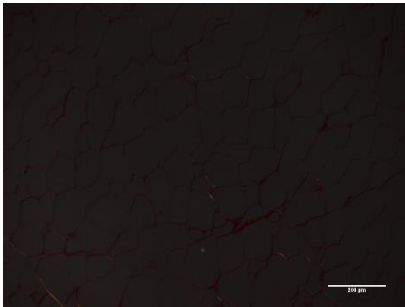

239

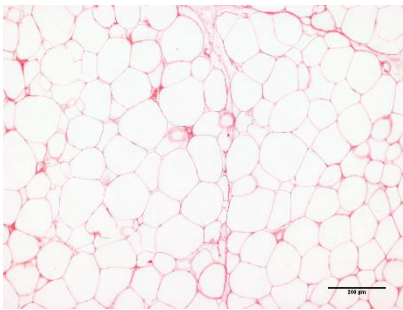

196

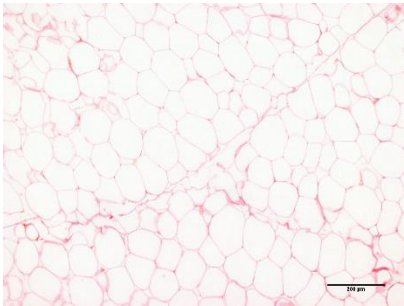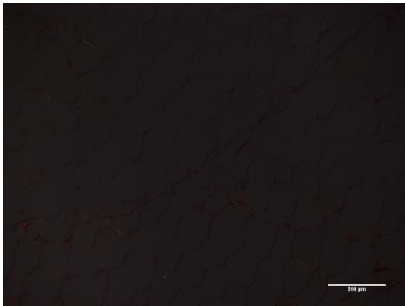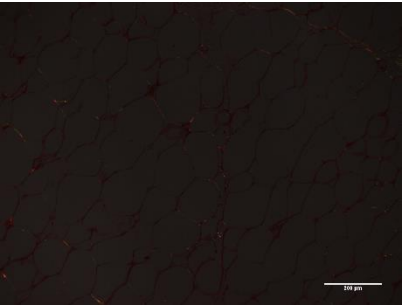

197

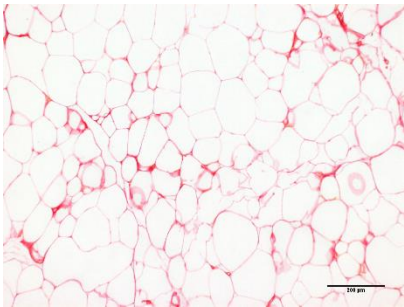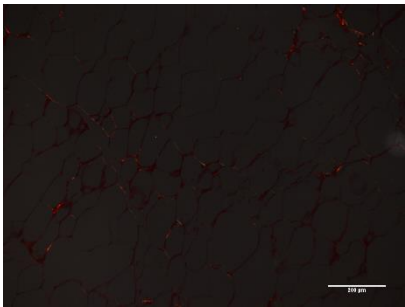

238

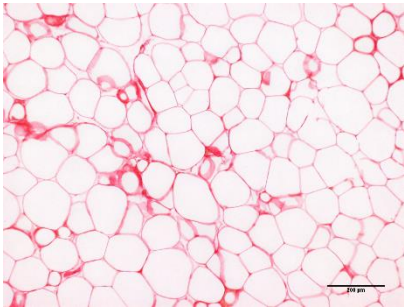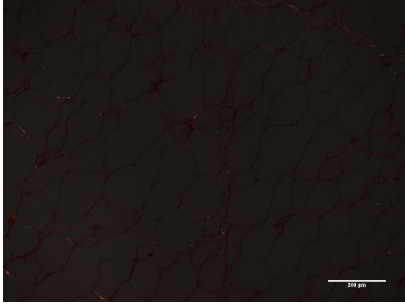

240

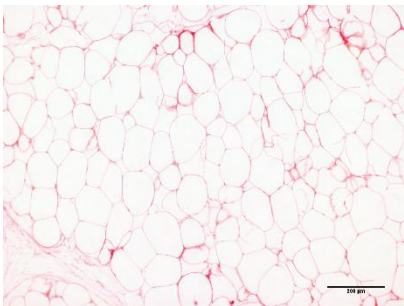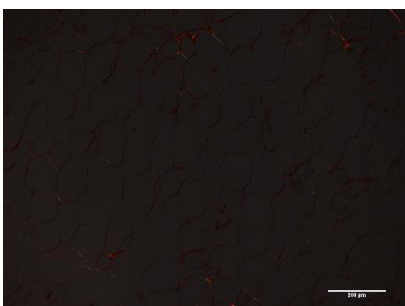

Supplement: supp [file elife_poa_e63324_Figure_4_source_data_1.pdf › elife_poa_e63324_Figure_4_source_data_1.pdf]
