# Supplementary material for: Adipocyte NR1D1 dictates adipose tissue expansion during obesity
Source: eLife. 2021 Aug 5;10:e63324. doi: 10.7554/eLife.63324 (PMC8360653; doi:10.7554/eLife.63324)
Supplement: Figure 1—source data 1. [file elife-63324-fig1-data1.xlsx]

## Sheet: Fig1C_Proteomics_KOvsWT_sigUP
ProteinID	Protein	Name
Q3TA38	T120B	Transmembrane protein 120B
Q6P9S0	MTSSL	MTSS1-like protein
Q78ZA7	NP1L4	Nucleosome assembly protein 1-like 4
Q91ZR2	SNX18	Sorting nexin-18
P05132	KAPCA	cAMP-dependent protein kinase catalytic subunit alpha
Q91V92	ACLY	ATP-citrate synthase
Q80UY1	CI041	UPF0586 protein C9orf41 homolog
P01867	IGG2B	Ig gamma-2B chain C region
Q99MD6	TRXR3	Thioredoxin reductase 3 (Fragment)
P06801	MAOX	NADP-dependent malic enzyme
Q9QZD8	DIC	Mitochondrial dicarboxylate carrier
P01864	GCAB	Ig gamma-2A chain C region secreted form
P19096	FAS	Fatty acid synthase
Q8BWM0	PGES2	Prostaglandin E synthase 2
Q9DB60	CA093	Uncharacterized protein C1orf93 homolog
Q05816	FABP5	Fatty acid-binding protein, epidermal
Q9DBU0	TM9S1	Transmembrane 9 superfamily member 1
P32115	PAX4	Paired box protein Pax-4
Q5SWU9	ACACA	Acetyl-CoA carboxylase 1
P27790	CENPB	Major centromere autoantigen B
Q9JK92	HSPB8	Heat shock protein beta-8
O88705	HCN3	Potassium/sodium hyperpolarization-activated cyclic nucleotide-gated channel 3
P99029	PRDX5	Peroxiredoxin-5, mitochondrial
Q8QZR5	ALAT1	Alanine aminotransferase 1
Q9D7S9	CHMP5	Charged multivesicular body protein 5
Q9WUA3	K6PP	6-phosphofructokinase type C
P41216	ACSL1	Long-chain-fatty-acid--CoA ligase 1
P40142	TKT	Transketolase
Q9CWF2	TBB2B	Tubulin Beta 2B Class Iib
P52480	KPYM	Pyruvate kinase isozymes M1/M2
Q9DCD0	6PGD	6-phosphogluconate dehydrogenase, decarboxylating
P56475	GBRR1	Gamma-aminobutyric acid receptor subunit rho-1
Q9ET01	PYGL	Glycogen phosphorylase, liver form
P05064	ALDOA	Fructose-bisphosphate aldolase A
Q501P1	FBLN7	Fibulin-7
P16406	AMPE	Glutamyl aminopeptidase
Q8VCM7	FIBG	Fibrinogen gamma chain
P20108	PRDX3	Thioredoxin-dependent peroxide reductase, mitochondrial
Q8K0U4	HS12A	Heat shock 70 kDa protein 12A
P52430	PON1	Serum paraoxonase/arylesterase 1
P11609	CD1D1	Antigen-presenting glycoprotein CD1d1
Q8K0E8	FIBB	Fibrinogen beta chain
Q8BKZ9	ODPX	Pyruvate dehydrogenase protein X component, mitochondrial
P17182	ENOA	Alpha-enolase
P35486	ODPA	Pyruvate dehydrogenase E1 component subunit alpha, somatic form, mitochondrial
Q9D384	U1SBP	U11/U12 small nuclear ribonucleoprotein 35 kDa protein
Q00612	G6PD1	Glucose-6-phosphate 1-dehydrogenase X
P16110	LEG3	Galectin-3
Q9QXG4	ACSA	Acetyl-coenzyme A synthetase, cytoplasmic
Q8BMF4	ODP2	Dihydrolipoyllysine-residue acetyltransferase component of pyruvate dehydrogenase complex, mitochondrial
Q9D6R2	IDH3A	Isocitrate dehydrogenase [NAD] subunit alpha, mitochondrial
Q9QZA0	CAH5B	Carbonic anhydrase 5B, mitochondrial
P56375	ACYP2	Acylphosphatase-2
P97447	FHL1	Four and a half LIM domains protein 1
Q9WTQ5	AKA12	A-kinase anchor protein 12
Q91V76	CK054	Ester hydrolase C11orf54 homolog
Q9DBP5	KCY	UMP-CMP kinase
Q05920	PYC	Pyruvate carboxylase, mitochondrial
P62897	CYC	Cytochrome c, somatic
P16858	G3P	Glyceraldehyde-3-phosphate dehydrogenase
P12382	K6PL	6-phosphofructokinase, liver type
P35505	FAAA	Fumarylacetoacetase
Q99MN9	PCCB	Propionyl-CoA carboxylase beta chain, mitochondrial
Q9JLZ3	AUHM	Methylglutaconyl-CoA hydratase, mitochondrial
P17751	TPIS	Triosephosphate isomerase
Q9CY27	TECR	Trans-2,3-enoyl-CoA reductase
Q9WVH9	FBLN5	Fibulin-5
Q01339	APOH	Beta-2-glycoprotein 1
O88587	COMT	Catechol O-methyltransferase
P97290	IC1	Plasma protease C1 inhibitor
Q9JJA7	CCNL2	Cyclin-L2
P50516	VATA	V-type proton ATPase catalytic subunit A
Q9JM51	PTGES	Prostaglandin E synthase
P28665	MUG1	Murinoglobulin-1
Q9D9V3	ECHD1	Enoyl-CoA hydratase domain-containing protein 1
O54984	ASNA	ATPase Asna1
P19324	SERPH	Serpin H1
P13707	GPDA	Glycerol-3-phosphate dehydrogenase [NAD+], cytoplasmic
P09671	SODM	Superoxide dismutase [Mn], mitochondrial
Q61147	CERU	Ceruloplasmin
Q9CZU6	CISY	Citrate synthase, mitochondrial
Q8R4N0	CLYBL	Citrate lyase subunit beta-like protein, mitochondrial
P10649	GSTM1	Glutathione S-transferase Mu 1
Q9DBE0	CSAD	Cysteine sulfinic acid decarboxylase
Q00897	A1AT4	Alpha-1-antitrypsin 1-4
Q9CQ62	DECR	2,4-dienoyl-CoA reductase, mitochondrial
Q07076	ANXA7	Annexin A7
Q2TPA8	HSDL2	Hydroxysteroid dehydrogenase-like protein 2
P09411	PGK1	Phosphoglycerate kinase 1
Q8BWT1	THIM	3-ketoacyl-CoA thiolase, mitochondrial
O08709	PRDX6	Peroxiredoxin-6
P15626	GSTM2	Glutathione S-transferase Mu 2

## Sheet: Fig1C_Proteomics_KOvsWT_sigDOWN
ProteinID	Protein	Name
Q75N62	GIMA8	GTPase IMAP family member 8
Q00898	A1AT5	Alpha-1-antitrypsin 1-5
Q9ET30	TM9S3	Transmembrane 9 superfamily member 3
P40936	INMT	Indolethylamine N-methyltransferase
Q05421	CP2E1	Cytochrome P450 2E1
Q08091	CNN1	Calponin-1
O55098	STK10	Serine/threonine-protein kinase 10
P97821	CATC	Dipeptidyl peptidase 1
Q9R099	TBL2	Transducin beta-like protein 2
Q8BIV7	S45A1	Proton-associated sugar transporter A
P27661	H2AX	Histone H2A.x
P52196	THTR	Thiosulfate sulfurtransferase
Q920Q4	VPS16	Vacuolar protein sorting-associated protein 16 homolog
P10922	H10	Histone H1.0
Q9D600	PSF2	DNA replication complex GINS protein PSF2
Q64475	H2B1B	Histone H2B type 1-B
Q9CQI6	COTL1	Coactosin-like protein
Q62318	TIF1B	Transcription intermediary factor 1-beta
Q99KQ4	NAMPT	Nicotinamide phosphoribosyltransferase
Q60722	ITF2	Transcription factor 4
P50285	FMO1	Dimethylaniline monooxygenase [N-oxide-forming] 1
Q9CZS1	AL1B1	Aldehyde dehydrogenase X, mitochondrial
P49290	PERE	Eosinophil peroxidase
Q7M6Y3	PICA	Phosphatidylinositol-binding clathrin assembly protein
Q8BSY0	ASPH	Aspartyl/asparaginyl beta-hydroxylase
P47964	RL36	60S ribosomal protein L36
Q9ERK4	XPO2	Exportin-2
Q61646	HPT	Haptoglobin
Q61207	SAP	Sulfated glycoprotein 1
Q3UBX0	TM109	Transmembrane protein 109
Q8R4Y4	STAB1	Stabilin-1
Q91VS7	MGST1	Microsomal glutathione S-transferase 1
Q8R2I0	FOXE1	Forkhead box protein E1
P63254	CRIP1	Cysteine-rich protein 1
P03953	CFAD	Complement factor D
Q6PE54	DHX40	Probable ATP-dependent RNA helicase DHX40
P21619	LMNB2	Lamin-B2
P08003	PDIA4	Protein disulfide-isomerase A4
Q9WUD1	CHIP	STIP1 homology and U box-containing protein 1
Q8BW75	AOFB	Amine oxidase [flavin-containing] B
P14733	LMNB1	Lamin-B1
Q02013	AQP1	Aquaporin-1
Q61878	PRG2	Bone marrow proteoglycan
Q9D0E1	HNRPM	Heterogeneous nuclear ribonucleoprotein M
P42225	STAT1	Signal transducer and activator of transcription 1
Q9CRB6	TPPP3	Tubulin polymerization-promoting protein family member 3
Q9WVE8	PACN2	Protein kinase C and casein kinase substrate in neurons protein 2
Q64471	GSTT1	Glutathione S-transferase theta-1
Q6P069	SORCN	Sorcin
Q64314	CD34	Hematopoietic progenitor cell antigen CD34
Q923B6	STEA4	Metalloreductase STEAP4
P16015	CAH3	Carbonic anhydrase 3
P62880	GBB2	Guanine nucleotide-binding protein G(I)/G(S)/G(T) subunit beta-2
Q8R081	HNRPL	Heterogeneous nuclear ribonucleoprotein L
Q8CFX1	G6PE	GDH/6PGL endoplasmic bifunctional protein
Q8C827	ZFP62	Zinc finger protein 62
P62751	RL23A	60S ribosomal protein L23a
P16125	LDHB	L-lactate dehydrogenase B chain
P18608	HMGN1	Non-histone chromosomal protein HMG-14
Q91V61	SFXN3	Sideroflexin-3
Q8VE97	SRSF4	Serine/arginine-rich splicing factor 4
Q9Z204	HNRPC	Heterogeneous nuclear ribonucleoproteins C1/C2
Q91YQ5	RPN1	Dolichyl-diphosphooligosaccharide--protein glycosyltransferase subunit 1
P62852	RS25	40S ribosomal protein S25
P30115	GSTA3	Glutathione S-transferase A3
P41105	RL28	60S ribosomal protein L28
Q8VCR7	ABHEB	Abhydrolase domain-containing protein 14B
Q8VCT4	CES3	Carboxylesterase 3
P63001	RAC1	Ras-related C3 botulinum toxin substrate 1
Q9DBS1	TMM43	Transmembrane protein 43
Q9R0Q7	TEBP	Prostaglandin E synthase 3
Q9D2R0	AACS	Acetoacetyl-CoA synthetase
P43274	H14	Histone H1.4
P51912	AAAT	Neutral amino acid transporter B(0)
P84104	SRSF3	Serine/arginine-rich splicing factor 3
Q9Z1N5	UAP56	Spliceosome RNA helicase Bat1
Q9WTI7	MYO1C	Myosin-Ic
O08585	CLCA	Clathrin light chain A
Q9QZQ8	H2AY	Core histone macro-H2A.1
Q62087	PON3	Serum paraoxonase/lactonase 3
Q61285	ABCD2	ATP-binding cassette sub-family D member 2
Q9R0K7	AT2B2	Plasma membrane calcium-transporting ATPase 2
Q9D819	IPYR	Inorganic pyrophosphatase
Q8BH61	F13A	Coagulation factor XIII A chain
P14069	S10A6	Protein S100-A6
Q3TDQ1	STT3B	Dolichyl-diphosphooligosaccharide--protein glycosyltransferase subunit STT3B
P48678	LMNA	Prelamin-A/C
P61979	HNRPK	Heterogeneous nuclear ribonucleoprotein K
Q9DBG6	RPN2	Dolichyl-diphosphooligosaccharide--protein glycosyltransferase subunit 2
P14211	CALR	Calreticulin

## Sheet: Fig1C_Proteomics_KOvsWT_all
ProteinID	Protein	Name	Log2FC	localFDR	globalFDR
Q8VCT4	CES3	Carboxylesterase 3	-0.238863	0.0016	0.0016
Q05421	CP2E1	Cytochrome P450 2E1	-0.728736	0.0022	0.0019
P05064	ALDOA	Fructose-bisphosphate aldolase A	0.371666	0.0024	0.00206667
Q8QZR5	ALAT1	Alanine aminotransferase 1	0.410176	0.0025	0.002175
P97821	CATC	Dipeptidyl peptidase 1	-0.500285	0.0025	0.00224
Q9DCD0	6PGD	6-phosphogluconate dehydrogenase, decarboxylating	0.375595	0.003	0.00236667
P50285	FMO1	Dimethylaniline monooxygenase [N-oxide-forming] 1	-0.365905	0.0036	0.00254286
P17751	TPIS	Triosephosphate isomerase	0.250653	0.0043	0.0027625
Q8K0U4	HS12A	Heat shock 70 kDa protein 12A	0.346613	0.0044	0.00294444
P35505	FAAA	Fumarylacetoacetase	0.260106	0.005	0.00315
Q00898	A1AT5	Alpha-1-antitrypsin 1-5	-0.868989	0.0052	0.00333636
P17182	ENOA	Alpha-enolase	0.322274	0.0055	0.00351667
P16406	AMPE	Glutamyl aminopeptidase	0.358528	0.006	0.00370769
P03953	CFAD	Complement factor D	-0.318405	0.0063	0.00389286
Q9DB60	CA093	Uncharacterized protein C1orf93 homolog	0.506323	0.0066	0.00407333
Q00612	G6PD1	Glucose-6-phosphate 1-dehydrogenase X	0.303387	0.0069	0.00425
P08003	PDIA4	Protein disulfide-isomerase A4	-0.31419	0.007	0.00441176
P16858	G3P	Glyceraldehyde-3-phosphate dehydrogenase	0.272007	0.0075	0.00458333
P10922	H10	Histone H1.0	-0.392122	0.0088	0.00480526
Q99KQ4	NAMPT	Nicotinamide phosphoribosyltransferase	-0.371766	0.0092	0.005025
Q91YQ5	RPN1	Dolichyl-diphosphooligosaccharide--protein glycosyltransferase subunit 1	-0.252739	0.0098	0.00525238
Q9DBS1	TMM43	Transmembrane protein 43	-0.232356	0.0105	0.00549091
Q5SWU9	ACACA	Acetyl-CoA carboxylase 1	0.469257	0.0114	0.00574783
P41216	ACSL1	Long-chain-fatty-acid--CoA ligase 1	0.38601	0.0121	0.0060125
Q9D7S9	CHMP5	Charged multivesicular body protein 5	0.392654	0.0129	0.006288
Q61207	SAP	Sulfated glycoprotein 1	-0.336212	0.0129	0.00654231
Q9CQI6	COTL1	Coactosin-like protein	-0.375273	0.0138	0.00681111
P35486	ODPA	Pyruvate dehydrogenase E1 component subunit alpha, somatic form, mitochondrial	0.30958	0.0139	0.00706429
P52480	KPYM	Pyruvate kinase isozymes M1/M2	0.377427	0.0142	0.00731034
Q05816	FABP5	Fatty acid-binding protein, epidermal	0.479284	0.0144	0.00754667
Q9QZA0	CAH5B	Carbonic anhydrase 5B, mitochondrial	0.292205	0.0155	0.00780323
P19096	FAS	Fatty acid synthase	0.520353	0.0161	0.0080625
Q8BSY0	ASPH	Aspartyl/asparaginyl beta-hydroxylase	-0.351747	0.0166	0.00832121
Q8K0E8	FIBB	Fibrinogen beta chain	0.339709	0.0175	0.00859118
Q9DBU0	TM9S1	Transmembrane 9 superfamily member 1	0.478939	0.0184	0.00887143
P06801	MAOX	NADP-dependent malic enzyme	0.597378	0.0188	0.00914722
Q9D384	U1SBP	U11/U12 small nuclear ribonucleoprotein 35 kDa protein	0.303511	0.0192	0.00941892
P14733	LMNB1	Lamin-B1	-0.305941	0.0192	0.00967632
Q9D6R2	IDH3A	Isocitrate dehydrogenase [NAD] subunit alpha, mitochondrial	0.295283	0.0199	0.00993846
Q9DBE0	CSAD	Cysteine sulfinic acid decarboxylase	0.187127	0.0207	0.0102075
Q91VS7	MGST1	Microsomal glutathione S-transferase 1	-0.329569	0.0217	0.0104878
P27661	H2AX	Histone H2A.x	-0.412106	0.0218	0.0107571
Q9ET30	TM9S3	Transmembrane 9 superfamily member 3	-0.803198	0.0231	0.0110442
Q8CFX1	G6PE	GDH/6PGL endoplasmic bifunctional protein	-0.261522	0.0232	0.0113205
P40142	TKT	Transketolase	0.382969	0.0233	0.0115867
Q91V76	CK054	Ester hydrolase C11orf54 homolog	0.285741	0.0234	0.0118435
Q8VCM7	FIBG	Fibrinogen gamma chain	0.35186	0.0235	0.0120915
Q62087	PON3	Serum paraoxonase/lactonase 3	-0.205437	0.0236	0.0123313
Q91V92	ACLY	ATP-citrate synthase	0.746398	0.0239	0.0125673
Q9CZS1	AL1B1	Aldehyde dehydrogenase X, mitochondrial	-0.362533	0.0242	0.0128
Q60722	ITF2	Transcription factor 4	-0.367673	0.0251	0.0130412
Q61646	HPT	Haptoglobin	-0.34001	0.0257	0.0132846
Q62318	TIF1B	Transcription intermediary factor 1-beta	-0.372631	0.0265	0.013534
Q9DBP5	KCY	UMP-CMP kinase	0.284769	0.0274	0.0137907
P99029	PRDX5	Peroxiredoxin-5, mitochondrial	0.425417	0.0281	0.0140509
Q8R081	HNRPL	Heterogeneous nuclear ribonucleoprotein L	-0.265288	0.029	0.0143179
Q99MN9	PCCB	Propionyl-CoA carboxylase beta chain, mitochondrial	0.259659	0.0291	0.0145772
Q64471	GSTT1	Glutathione S-transferase theta-1	-0.289168	0.0293	0.014831
P11609	CD1D1	Antigen-presenting glycoprotein CD1d1	0.344325	0.031	0.0151051
O55098	STK10	Serine/threonine-protein kinase 10	-0.546202	0.0315	0.0153783
Q9ET01	PYGL	Glycogen phosphorylase, liver form	0.372358	0.0318	0.0156475
Q9WUA3	K6PP	6-phosphofructokinase type C	0.389235	0.0318	0.0159081
Q9WTI7	MYO1C	Myosin-Ic	-0.212036	0.0321	0.0161651
P62897	CYC	Cytochrome c, somatic	0.273385	0.0336	0.0164375
P32115	PAX4	Paired box protein Pax-4	0.473171	0.0348	0.01672
Q8C827	ZFP62	Zinc finger protein 62	-0.261319	0.0352	0.017
P62880	GBB2	Guanine nucleotide-binding protein G(I)/G(S)/G(T) subunit beta-2	-0.265343	0.0357	0.0172791
O88705	HCN3	Potassium/sodium hyperpolarization-activated cyclic nucleotide-gated channel 3	0.433555	0.0359	0.0175529
P30115	GSTA3	Glutathione S-transferase A3	-0.244187	0.0377	0.0178449
P51912	AAAT	Neutral amino acid transporter B(0)	-0.217463	0.0377	0.0181286
Q3UBX0	TM109	Transmembrane protein 109	-0.335515	0.038	0.0184085
Q9Z1N5	UAP56	Spliceosome RNA helicase Bat1	-0.213673	0.0381	0.0186819
P09671	SODM	Superoxide dismutase [Mn], mitochondrial	0.205229	0.0385	0.0189534
Q6P069	SORCN	Sorcin	-0.280024	0.0387	0.0192203
Q75N62	GIMA8	GTPase IMAP family member 8	-1.30699	0.0391	0.0194853
Q64475	H2B1B	Histone H2B type 1-B	-0.38524	0.0398	0.0197526
P40936	INMT	Indolethylamine N-methyltransferase	-0.757136	0.0402	0.0200182
Q8BWT1	THIM	3-ketoacyl-CoA thiolase, mitochondrial	0.168648	0.0408	0.0202846
P63254	CRIP1	Cysteine-rich protein 1	-0.318726	0.0414	0.0205519
Q80UY1	CI041	UPF0586 protein C9orf41 homolog	0.736131	0.043	0.0208325
P13707	GPDA	Glycerol-3-phosphate dehydrogenase [NAD+], cytoplasmic	0.206705	0.043	0.0211062
P16015	CAH3	Carbonic anhydrase 3	-0.267207	0.0432	0.0213756
Q9CQ62	DECR	2,4-dienoyl-CoA reductase, mitochondrial	0.182828	0.0437	0.0216446
P52196	THTR	Thiosulfate sulfurtransferase	-0.407781	0.0439	0.0219095
Q9CWF2	TBB2B	Tubulin Beta 2B Class Iib	0.380525	0.0447	0.0221776
Q8BIV7	S45A1	Proton-associated sugar transporter A	-0.434297	0.0452	0.0224453
Q61147	CERU	Ceruloplasmin	0.198464	0.0462	0.0227184
Q9ERK4	XPO2	Exportin-2	-0.343336	0.0465	0.0229886
Q9WTQ5	AKA12	A-kinase anchor protein 12	0.290242	0.0477	0.0232663
Q6PE54	DHX40	Probable ATP-dependent RNA helicase DHX40	-0.31608	0.0497	0.02356
P50516	VATA	V-type proton ATPase catalytic subunit A	0.224459	0.0501	0.0238516
P28665	MUG1	Murinoglobulin-1	0.220642	0.0502	0.024138
Q9JLZ3	AUHM	Methylglutaconyl-CoA hydratase, mitochondrial	0.252104	0.0514	0.0244312
P20108	PRDX3	Thioredoxin-dependent peroxide reductase, mitochondrial	0.349797	0.0531	0.0247362
P62852	RS25	40S ribosomal protein S25	-0.252373	0.0536	0.02504
Q8BH61	F13A	Coagulation factor XIII A chain	-0.194323	0.0537	0.0253385
Q9CY27	TECR	Trans-2,3-enoyl-CoA reductase	0.24841	0.0542	0.0256361
Q8BKZ9	ODPX	Pyruvate dehydrogenase protein X component, mitochondrial	0.333003	0.0551	0.0259367
Q9QZD8	DIC	Mitochondrial dicarboxylate carrier	0.571612	0.0566	0.0262465
P12382	K6PL	6-phosphofructokinase, liver type	0.260549	0.0573	0.026557
P09411	PGK1	Phosphoglycerate kinase 1	0.169338	0.0575	0.0268634
Q9CRB6	TPPP3	Tubulin polymerization-promoting protein family member 3	-0.29108	0.0577	0.0271657
Q64314	CD34	Hematopoietic progenitor cell antigen CD34	-0.274643	0.058	0.027465
P43274	H14	Histone H1.4	-0.224003	0.0586	0.0277644
Q8BMF4	ODP2	Dihydrolipoyllysine-residue acetyltransferase component of pyruvate dehydrogenase complex, mitochondrial	0.29583	0.0586	0.0280581
Q9D819	IPYR	Inorganic pyrophosphatase	-0.195602	0.0595	0.0283547
P16125	LDHB	L-lactate dehydrogenase B chain	-0.259505	0.06	0.0286505
O08709	PRDX6	Peroxiredoxin-6	0.166593	0.061	0.02895
Q9QZQ8	H2AY	Core histone macro-H2A.1	-0.205711	0.062	0.0292532
P14211	CALR	Calreticulin	-0.135157	0.0621	0.0295518
P47964	RL36	60S ribosomal protein L36	-0.347099	0.0628	0.0298514
Q8R4Y4	STAB1	Stabilin-1	-0.334235	0.0628	0.0301455
P16110	LEG3	Galectin-3	0.298964	0.0628	0.0304345
Q2TPA8	HSDL2	Hydroxysteroid dehydrogenase-like protein 2	0.170272	0.0632	0.0307219
P52430	PON1	Serum paraoxonase/arylesterase 1	0.34609	0.064	0.0310113
P63001	RAC1	Ras-related C3 botulinum toxin substrate 1	-0.236744	0.065	0.0313043
P27790	CENPB	Major centromere autoantigen B	0.451181	0.0653	0.0315949
P56375	ACYP2	Acylphosphatase-2	0.291599	0.0669	0.0318941
Q78ZA7	NP1L4	Nucleosome assembly protein 1-like 4	1.11752	0.067	0.0321891
Q9JM51	PTGES	Prostaglandin E synthase	0.223129	0.0671	0.03248
Q923B6	STEA4	Metalloreductase STEAP4	-0.273993	0.0673	0.0327678
Q8BW75	AOFB	Amine oxidase [flavin-containing] B	-0.31094	0.0696	0.0330697
P48678	LMNA	Prelamin-A/C	-0.167273	0.0696	0.0333667
P97290	IC1	Plasma protease C1 inhibitor	0.229335	0.0707	0.0336677
P41105	RL28	60S ribosomal protein L28	-0.242328	0.0709	0.0339656
P10649	GSTM1	Glutathione S-transferase Mu 1	0.187826	0.0712	0.0342611
P56475	GBRR1	Gamma-aminobutyric acid receptor subunit rho-1	0.375069	0.0715	0.0345543
P19324	SERPH	Serpin H1	0.213822	0.0718	0.0348453
O54984	ASNA	ATPase Asna1	0.214138	0.072	0.0351333
Q6P9S0	MTSSL	MTSS1-like protein	1.71577	0.0725	0.0354208
Q8BWM0	PGES2	Prostaglandin E synthase 2	0.515154	0.0726	0.0357046
Q00897	A1AT4	Alpha-1-antitrypsin 1-4	0.184096	0.0744	0.0359977
Q3TDQ1	STT3B	Dolichyl-diphosphooligosaccharide--protein glycosyltransferase subunit STT3B	-0.188829	0.0748	0.0362895
Q91V61	SFXN3	Sideroflexin-3	-0.254715	0.0755	0.0365821
Q9R099	TBL2	Transducin beta-like protein 2	-0.441416	0.0755	0.0368704
Q9CZU6	CISY	Citrate synthase, mitochondrial	0.198097	0.0757	0.0371559
Q8R4N0	CLYBL	Citrate lyase subunit beta-like protein, mitochondrial	0.191054	0.0769	0.037446
Q02013	AQP1	Aquaporin-1	-0.30384	0.0775	0.0377362
Q01339	APOH	Beta-2-glycoprotein 1	0.238351	0.0778	0.0380245
Q61878	PRG2	Bone marrow proteoglycan	-0.298696	0.078	0.03831
Q9WVH9	FBLN5	Fibulin-5	0.238987	0.0781	0.0385922
Q9D600	PSF2	DNA replication complex GINS protein PSF2	-0.388705	0.0785	0.0388732
Q9WUD1	CHIP	STIP1 homology and U box-containing protein 1	-0.313927	0.0787	0.0391517
Q9QXG4	ACSA	Acetyl-coenzyme A synthetase, cytoplasmic	0.29849	0.0793	0.0394306
Q08091	CNN1	Calponin-1	-0.700393	0.0796	0.0397076
P15626	GSTM2	Glutathione S-transferase Mu 2	0.136666	0.0806	0.0399877
P42225	STAT1	Signal transducer and activator of transcription 1	-0.291705	0.081	0.0402667
P01867	IGG2B	Ig gamma-2B chain C region	0.640522	0.0813	0.0405439
Q9D0E1	HNRPM	Heterogeneous nuclear ribonucleoprotein M	-0.298649	0.0817	0.0408201
Q99MD6	TRXR3	Thioredoxin reductase 3 (Fragment)	0.613022	0.0828	0.0411
Q501P1	FBLN7	Fibulin-7	0.359697	0.0842	0.0413854
O08585	CLCA	Clathrin light chain A	-0.210986	0.0844	0.0416684
P21619	LMNB2	Lamin-B2	-0.315752	0.0847	0.0419497
P49290	PERE	Eosinophil peroxidase	-0.360931	0.0852	0.0422305
Q07076	ANXA7	Annexin A7	0.173319	0.0855	0.0425097
Q8VE97	SRSF4	Serine/arginine-rich splicing factor 4	-0.254679	0.0855	0.0427853
Q9DBG6	RPN2	Dolichyl-diphosphooligosaccharide--protein glycosyltransferase subunit 2	-0.158163	0.0858	0.0430592
Q7M6Y3	PICA	Phosphatidylinositol-binding clathrin assembly protein	-0.354542	0.0861	0.0433316
Q3TA38	T120B	Transmembrane protein 120B	2.18147	0.0862	0.0436013
Q91ZR2	SNX18	Sorting nexin-18	1.09504	0.0866	0.04387
Q9R0Q7	TEBP	Prostaglandin E synthase 3	-0.229134	0.0875	0.044141
Q9R0K7	AT2B2	Plasma membrane calcium-transporting ATPase 2	-0.197614	0.0875	0.0444086
P18608	HMGN1	Non-histone chromosomal protein HMG-14	-0.256723	0.0877	0.0446742
P62751	RL23A	60S ribosomal protein L23a	-0.260582	0.0878	0.0449372
Q9Z204	HNRPC	Heterogeneous nuclear ribonucleoproteins C1/C2	-0.253634	0.0891	0.0452048
P01864	GCAB	Ig gamma-2A chain C region secreted form	0.540093	0.0892	0.0454699
Q61285	ABCD2	ATP-binding cassette sub-family D member 2	-0.197978	0.0899	0.0457359
Q920Q4	VPS16	Vacuolar protein sorting-associated protein 16 homolog	-0.397786	0.0904	0.0460018
P61979	HNRPK	Heterogeneous nuclear ribonucleoprotein K	-0.165845	0.0906	0.0462657
Q9D9V3	ECHD1	Enoyl-CoA hydratase domain-containing protein 1	0.220636	0.0907	0.0465271
Q9WVE8	PACN2	Protein kinase C and casein kinase substrate in neurons protein 2	-0.290334	0.0908	0.046786
Q9D2R0	AACS	Acetoacetyl-CoA synthetase	-0.224754	0.0915	0.0470459
P97447	FHL1	Four and a half LIM domains protein 1	0.290359	0.0935	0.0473145
Q9JK92	HSPB8	Heat shock protein beta-8	0.45023	0.0941	0.0475833
Q05920	PYC	Pyruvate carboxylase, mitochondrial	0.276617	0.0953	0.047856
P84104	SRSF3	Serine/arginine-rich splicing factor 3	-0.216033	0.0954	0.0481261
Q8VCR7	ABHEB	Abhydrolase domain-containing protein 14B	-0.240426	0.0955	0.0483938
Q8R2I0	FOXE1	Forkhead box protein E1	-0.327196	0.0957	0.0486596
P05132	KAPCA	cAMP-dependent protein kinase catalytic subunit alpha	0.80263	0.0966	0.0489274
Q9JJA7	CCNL2	Cyclin-L2	0.228249	0.0974	0.0491967
P14069	S10A6	Protein S100-A6	-0.189445	0.0982	0.0494674
O88587	COMT	Catechol O-methyltransferase	0.229665	0.0984	0.0497363
P62806	H4	Histone H4	-0.329062	0.0984	0.0500022
P62242	RS8	40S ribosomal protein S8	-0.185135	0.0985	0.0502658
Q62264	THRSP	Thyroid hormone-inducible hepatic protein	0.232102	0.1003	0.0505362
Q9CXI5	MANF	Mesencephalic astrocyte-derived neurotrophic factor	-0.387742	0.1005	0.0508048
Q60636	PRDM1	PR domain zinc finger protein 1	0.308968	0.1005	0.0510706
P15864	H12	Histone H1.2	-0.289427	0.1007	0.0513346
P13516	ACOD1	Acyl-CoA desaturase 1	0.224436	0.101	0.0515974
P63030	BR44L	Brain protein 44-like protein	0.240253	0.1015	0.05186
Q3UVK0	ERMP1	Endoplasmic reticulum metallopeptidase 1	-0.17837	0.1017	0.0521209
P30285	CDK4	Cyclin-dependent kinase 4	0.277638	0.1025	0.0523833
P52840	ST1A1	Sulfotransferase 1A1	-0.212672	0.1032	0.0526466
Q61704	ITIH3	Inter-alpha-trypsin inhibitor heavy chain H3	0.311141	0.1038	0.0529103
Q920E5	FPPS	Farnesyl pyrophosphate synthase	0.223156	0.104	0.0531723
Q61830	MRC1	Macrophage mannose receptor 1	-0.237136	0.1058	0.0534408
O08749	DLDH	Dihydrolipoyl dehydrogenase, mitochondrial	0.189423	0.1063	0.0537091
P08249	MDHM	Malate dehydrogenase, mitochondrial	0.158489	0.1066	0.0539763
Q61024	ASNS	Asparagine synthetase [glutamine-hydrolyzing]	-0.236736	0.1078	0.0542467
Q9QWK4	CD5L	CD5 antigen-like	0.427381	0.1081	0.054516
P35235	PTN11	Tyrosine-protein phosphatase non-receptor type 11	0.207935	0.1081	0.0547826
P59053	KCNG3	Potassium voltage-gated channel subfamily G member 3	0.49486	0.1098	0.055055
O70251	EF1B	Elongation factor 1-beta	0.143014	0.1099	0.0553251
Q8CGN5	PLIN1	Perilipin-1	-0.189095	0.1101	0.0555936
Q64433	CH10	10 kDa heat shock protein, mitochondrial	0.159867	0.1101	0.0558595
Q61656	DDX5	Probable ATP-dependent RNA helicase DDX5	-0.184288	0.1103	0.0561238
Q9D051	ODPB	Pyruvate dehydrogenase E1 component subunit beta, mitochondrial	0.245404	0.1107	0.0563874
Q91VI7	RINI	Ribonuclease inhibitor	-0.20008	0.1109	0.0566495
P16045	LEG1	Galectin-1	0.139932	0.1109	0.0569091
P03930	ATP8	ATP synthase protein 8	0.334294	0.1116	0.0571695
P43276	H15	Histone H1.5	-0.204898	0.1118	0.0574284
P25206	MCM3	DNA replication licensing factor MCM3	0.48003	0.1126	0.0576887
O08795	GLU2B	Glucosidase 2 subunit beta	-0.161139	0.1128	0.0579474
P49182	HEP2	Heparin cofactor 2	0.223203	0.113	0.0582047
Q6ZQ38	CAND1	Cullin-associated NEDD8-dissociated protein 1	-0.17784	0.1135	0.0584619
A9Z1V5	VW5B1	von Willebrand factor A domain-containing protein 5B1	0.449944	0.1137	0.0587176
O08529	CAN2	Calpain-2 catalytic subunit	0.228269	0.1138	0.0589714
Q62000	MIME	Mimecan	-0.16607	0.1142	0.0592248
Q80VQ0	AL3B1	Aldehyde dehydrogenase family 3 member B1	-0.28145	0.1144	0.0594767
Q9DCJ9	NPL	N-acetylneuraminate lyase	-0.333657	0.1147	0.0597277
P58044	IDI1	Isopentenyl-diphosphate Delta-isomerase 1	0.800648	0.1148	0.0599769
Q62137	JAK3	Tyrosine-protein kinase JAK3	1.52843	0.1149	0.0602243
Q99J47	DRS7B	Dehydrogenase/reductase SDR family member 7B	-0.196952	0.1159	0.060474
P62849	RS24	40S ribosomal protein S24	1.39415	0.1163	0.0607232
Q01279	EGFR	Epidermal growth factor receptor	-0.180398	0.1165	0.0609711
Q811B1	XYLT1	Xylosyltransferase 1	0.289429	0.1169	0.0612186
Q99L47	F10A1	Hsc70-interacting protein	-0.162064	0.1171	0.0614648
Q9DBH5	LMAN2	Vesicular integral-membrane protein VIP36	0.174169	0.1181	0.0617132
P01837	IGKC	Ig kappa chain C region	0.44708	0.1182	0.0619598
Q02257	PLAK	Junction plakoglobin	0.23765	0.1188	0.062207
Q3TEA8	HP1B3	Heterochromatin protein 1-binding protein 3	-0.177452	0.1188	0.0624519
Q4FZG7	TI8AB	Putative mitochondrial import inner membrane translocase subunit Tim8 A-B	0.418924	0.1223	0.0627099
Q4KL35	MAGIX	PDZ domain-containing protein MAGIX	-0.221838	0.1228	0.0629678
Q9DCT2	NDUS3	NADH dehydrogenase [ubiquinone] iron-sulfur protein 3, mitochondrial	0.172818	0.1228	0.0632235
Q8BGT6	MILK1	MICAL-like protein 1	-0.334474	0.1232	0.0634787
Q8R3U1	PAG16	Group XVI phospholipase A2	-0.26212	0.1232	0.0637318
Q00724	RET4	Retinol-binding protein 4	0.267751	0.1245	0.0639882
Q6PD26	PIGS	GPI transamidase component PIG-S	0.279303	0.125	0.0642445
O35215	DOPD	D-dopachrome decarboxylase	1.67961	0.1253	0.0645
O35945	AL1A7	Aldehyde dehydrogenase, cytosolic 1	0.28913	0.1253	0.0647533
Q6DID7	WLS	Protein wntless homolog	1.56014	0.1255	0.0650054
Q7TT50	MRCKB	Serine/threonine-protein kinase MRCK beta	0.30803	0.1257	0.0652562
P27659	RL3	60S ribosomal protein L3	-0.226995	0.1259	0.0655058
Q9R0E1	PLOD3	Procollagen-lysine,2-oxoglutarate 5-dioxygenase 3	0.220647	0.126	0.0657537
P60335	PCBP1	Poly(rC)-binding protein 1	-0.207381	0.1262	0.0660004
P10518	HEM2	Delta-aminolevulinic acid dehydratase	-0.187568	0.1272	0.0662492
P56395	CYB5	Cytochrome b5	-0.153046	0.1278	0.0664984
Q9R111	GUAD	Guanine deaminase	0.158692	0.1278	0.0667456
Q80ZW0	STK35	Serine/threonine-protein kinase 35	-0.423148	0.1285	0.0669936
P14131	RS16	40S ribosomal protein S16	-0.167459	0.1293	0.0672428
Q99KF1	TMED9	Transmembrane emp24 domain-containing protein 9	-0.333355	0.1299	0.0674924
Q9CQ45	NENF	Neudesin	-0.210272	0.1302	0.0677413
P01872	IGHM	Ig mu chain C region secreted form	0.300826	0.1306	0.0679897
P98078	DAB2	Disabled homolog 2	-0.206347	0.1307	0.0682366
Q3U0V1	FUBP2	Far upstream element-binding protein 2	-0.202442	0.1314	0.0684843
Q91W90	TXND5	Thioredoxin domain-containing protein 5	-0.143097	0.1319	0.068732
B2RQE8	RHG42	Rho GTPase-activating protein 42	0.434147	0.1321	0.0689786
O35295	PURB	Transcriptional activator protein Pur-beta	0.21366	0.1324	0.0692244
P41969	ELK1	ETS domain-containing protein Elk-1	-0.185147	0.1331	0.069471
Q6NZK5	K1328	Uncharacterized protein KIAA1328	0.27628	0.1337	0.0697181
Q60590	A1AG1	Alpha-1-acid glycoprotein 1	0.210653	0.1337	0.0699632
Q8BGC4	ZADH2	Zinc-binding alcohol dehydrogenase domain-containing protein 2	0.668529	0.1356	0.0702137
P63330	PP2AA	Serine/threonine-protein phosphatase 2A catalytic subunit alpha isoform	0.665592	0.1364	0.0704654
Q9D379	HYEP	Epoxide hydrolase 1	0.166904	0.1376	0.0707197
P36536	SAR1A	GTP-binding protein SAR1a	-0.255397	0.1378	0.0709728
P57746	VATD	V-type proton ATPase subunit D	0.306538	0.1384	0.0712263
Q9R1J0	NSDHL	Sterol-4-alpha-carboxylate 3-dehydrogenase, decarboxylating	0.469329	0.1386	0.0714787
Q9ERR7	SEP15	15 kDa selenoprotein	0.286067	0.1393	0.0717317
P60766	CDC42	Cell division control protein 42 homolog	-0.239351	0.1397	0.0719844
P24452	CAPG	Macrophage-capping protein	-0.204787	0.1397	0.0722352
P08113	ENPL	Endoplasmin	-0.116732	0.1398	0.0724845
Q9ES56	TPPC4	Trafficking protein particle complex subunit 4	0.288641	0.1399	0.0727324
Q3U1C6	TATD3	Putative deoxyribonuclease TATDN3	0.273025	0.1402	0.0729795
Q61233	PLSL	Plastin-2	-0.197312	0.1406	0.0732263
Q6GQX6	ANKS6	Ankyrin repeat and SAM domain-containing protein 6	0.302951	0.1411	0.0734731
Q8VEK3	HNRPU	Heterogeneous nuclear ribonucleoprotein U	-0.16757	0.1417	0.0737203
P62889	RL30	60S ribosomal protein L30	-0.178137	0.1428	0.0739697
P27773	PDIA3	Protein disulfide-isomerase A3	-0.119255	0.1428	0.0742173
Q9D8U4	C1QT2	Complement C1q tumor necrosis factor-related protein 2	0.277844	0.143	0.0744638
P62281	RS11	40S ribosomal protein S11	-0.20747	0.1442	0.0747129
P62918	RL8	60S ribosomal protein L8	-0.1407	0.1452	0.0749637
Q64213	SF01	Splicing factor 1	-0.274493	0.146	0.0752156
P26041	MOES	Moesin	-0.132202	0.1461	0.0754661
P97855	G3BP1	Ras GTPase-activating protein-binding protein 1	1.18901	0.1468	0.0757173
Q9D7N9	APMAP	Adipocyte plasma membrane-associated protein	0.130666	0.1478	0.0759702
Q80SZ7	GBG5	Guanine nucleotide-binding protein G(I)/G(S)/G(O) subunit gamma-5	-0.179806	0.1484	0.0762234
Q99P72	RTN4	Reticulon-4	0.205819	0.1492	0.0764777
P01750	HVM06	Ig heavy chain V region 102	0.430296	0.1496	0.0767316
Q9R062	GLYG	Glycogenin-1	0.239744	0.1498	0.0769844
Q9Z0E6	GBP2	Interferon-induced guanylate-binding protein 2	-0.271431	0.1501	0.0772366
Q8VCC2	EST1	Liver carboxylesterase 1	-0.770543	0.1507	0.077489
Q62048	PEA15	Astrocytic phosphoprotein PEA-15	0.217442	0.1508	0.0777401
Q8CG50	RAB43	Ras-related protein Rab-43	0.21053	0.1509	0.0779898
Q80WQ2	VAC14	Protein VAC14 homolog	0.305581	0.151	0.0782381
P61027	RAB10	Ras-related protein Rab-10	-0.230376	0.1514	0.0784861
Q9CYR0	SSBP	Single-stranded DNA-binding protein, mitochondrial	0.591792	0.1517	0.0787334
Q9D0J8	PTMS	Parathymosin	-0.177769	0.1517	0.0789791
Q80SU7	GVIN1	Interferon-induced very large GTPase 1	-0.406569	0.1518	0.0792235
Q8R0J1	PKHG6	Pleckstrin homology domain-containing family G member 6	0.880223	0.1521	0.0794672
Q9D8U8	SNX5	Sorting nexin-5	1.33503	0.1523	0.07971
Q9D1D4	TMEDA	Transmembrane emp24 domain-containing protein 10	-0.132598	0.1524	0.0799515
Q9CZD3	SYG	Glycyl-tRNA synthetase	0.272565	0.153	0.0801934
P56959	FUS	RNA-binding protein FUS	-0.242877	0.1533	0.0804347
Q9D898	ARP5L	Actin-related protein 2/3 complex subunit 5-like protein	0.234702	0.1535	0.080675
Q9JK53	PRELP	Prolargin	-0.202219	0.1543	0.0809164
Q64176	EST22	Liver carboxylesterase 22	-0.214261	0.1557	0.0811608
P62627	DLRB1	Dynein light chain roadblock-type 1	0.356551	0.1562	0.0814052
Q9CPY7	AMPL	Cytosol aminopeptidase	-0.151551	0.1563	0.0816484
Q1ERP8	CLM9	CMRF35-like molecule 9	1.61939	0.1567	0.0818913
Q3UQ28	PXDN	Peroxidasin homolog	0.240967	0.1569	0.0821332
Q9JLB0	MPP6	MAGUK p55 subfamily member 6	0.525093	0.1569	0.0823736
Q99LS3	SERB	Phosphoserine phosphatase	0.341872	0.157	0.0826128
Q9QXK3	COPG2	Coatomer subunit gamma-2	0.306503	0.1571	0.0828508
P55065	PLTP	Phospholipid transfer protein	0.406186	0.1582	0.0830908
Q60932	VDAC1	Voltage-dependent anion-selective channel protein 1	0.217801	0.1585	0.0833302
Q9EQ20	MMSA	Methylmalonate-semialdehyde dehydrogenase [acylating], mitochondrial	-0.127477	0.1586	0.0835684
Q02357	ANK1	Ankyrin-1	0.413341	0.1587	0.0838054
A0AUV4	SMKY	Sperm motility kinase Y	0.465469	0.1589	0.0840415
Q8R2G4	NAR3	Ecto-ADP-ribosyltransferase 3	-0.163618	0.1589	0.0842762
P62317	SMD2	Small nuclear ribonucleoprotein Sm D2	-0.208793	0.159	0.0845097
P35979	RL12	60S ribosomal protein L12	-0.125548	0.159	0.0847417
Q80YC5	FA12	Coagulation factor XII	0.308005	0.1597	0.0849745
Q8BG05	ROA3	Heterogeneous nuclear ribonucleoprotein A3	0.937947	0.1599	0.0852065
O35566	CD151	CD151 antigen	1.02127	0.1601	0.0854377
Q9D8N0	EF1G	Elongation factor 1-gamma	0.141683	0.1611	0.0856705
Q8VIH1	NOBOX	Homeobox protein NOBOX	-0.325976	0.1614	0.0859028
Q9Z2A9	GGT5	Gamma-glutamyltransferase 5	-0.201727	0.1615	0.0861339
Q9QXE0	HACL1	2-hydroxyacyl-CoA lyase 1	0.463679	0.1635	0.0863698
Q9CYG7	TOM34	Mitochondrial import receptor subunit TOM34	0.197914	0.1639	0.0866055
O70310	NMT1	Glycylpeptide N-tetradecanoyltransferase 1	0.202647	0.1643	0.0868409
Q99KP6	PRP19	Pre-mRNA-processing factor 19	-0.205894	0.1644	0.0870752
Q9EQQ2	YIPF5	Protein YIPF5	-0.260841	0.1646	0.0873087
Q8VCI5	PEX19	Peroxisomal biogenesis factor 19	0.621968	0.1647	0.0875411
Q9JLT4	TRXR2	Thioredoxin reductase 2, mitochondrial	0.257224	0.1658	0.0877754
Q9DCF9	SSRG	Translocon-associated protein subunit gamma	0.238575	0.1663	0.0880099
Q9CZM2	RL15	60S ribosomal protein L15	-0.180437	0.1666	0.0882437
P02088	HBB1	Hemoglobin subunit beta-1	0.440672	0.1673	0.0884783
Q3U3N0	MIER2	Mesoderm induction early response protein 2	1.14472	0.1676	0.0887124
P18242	CATD	Cathepsin D	0.176634	0.1681	0.0889466
P43275	H11	Histone H1.1	-0.198444	0.1683	0.08918
Q9CPW4	ARPC5	Actin-related protein 2/3 complex subunit 5	-0.222504	0.169	0.0894141
O89112	LANC1	LanC-like protein 1	0.860134	0.1695	0.0896482
Q9D880	TIM50	Mitochondrial import inner membrane translocase subunit TIM50	0.257658	0.1696	0.0898813
P29758	OAT	Ornithine aminotransferase, mitochondrial	-0.180892	0.1701	0.0901145
Q9JLI6	SCLY	Selenocysteine lyase	0.405145	0.1705	0.0903475
Q9JM14	NT5C	5'(3')-deoxyribonucleotidase, cytosolic type	0.264438	0.1711	0.0905809
Q5SWT3	S2535	Solute carrier family 25 member 35	0.228705	0.1712	0.0908133
Q9DCU6	RM04	39S ribosomal protein L4, mitochondrial	0.20978	0.1722	0.0910471
P61961	UFM1	Ubiquitin-fold modifier 1	0.261324	0.1723	0.0912799
P59672	ANS1A	Ankyrin repeat and SAM domain-containing protein 1A	0.245804	0.1747	0.0915183
Q6P5F9	XPO1	Exportin-1	-0.189381	0.1752	0.0917567
Q922H4	GMPPA	Mannose-1-phosphate guanyltransferase alpha	0.286254	0.1754	0.0919943
Q8R5J9	PRAF3	PRA1 family protein 3	1.16751	0.1758	0.0922317
Q9D7X3	DUS3	Dual specificity protein phosphatase 3	0.150587	0.1758	0.0924678
Q9CXR1	DHRS7	Dehydrogenase/reductase SDR family member 7	0.245343	0.1759	0.0927028
P35564	CALX	Calnexin	-0.142373	0.1766	0.0929385
O70475	UGDH	UDP-glucose 6-dehydrogenase	0.620518	0.1767	0.0931731
Q04750	TOP1	DNA topoisomerase 1	-0.307138	0.1769	0.093407
P32261	ANT3	Antithrombin-III	0.155642	0.1769	0.0936396
Q9WVK4	EHD1	EH domain-containing protein 1	-0.15963	0.1777	0.0938731
Q9WV54	ASAH1	Acid ceramidase	0.681689	0.1782	0.0941066
Q9JK42	PDK2	[Pyruvate dehydrogenase [lipoamide]] kinase isozyme 2, mitochondrial	0.899638	0.1784	0.0943395
Q9D1Q4	DPM3	Dolichol-phosphate mannosyltransferase subunit 3	-0.221852	0.1784	0.0945711
Q8BZS9	DHX32	Putative pre-mRNA-splicing factor ATP-dependent RNA helicase DHX32	0.39248	0.1785	0.0948016
P01899	HA11	H-2 class I histocompatibility antigen, D-B alpha chain	-0.221946	0.1787	0.0950315
P53996	CNBP	Cellular nucleic acid-binding protein	1.16993	0.1799	0.0952634
P11031	TCP4	Activated RNA polymerase II transcriptional coactivator p15	-0.270688	0.1799	0.095494
P80313	TCPH	T-complex protein 1 subunit eta	0.175817	0.1802	0.0957242
Q8BFZ9	ERLN2	Erlin-2	-0.186965	0.1804	0.0959537
Q9R069	BCAM	Basal cell adhesion molecule	-0.169881	0.1804	0.0961819
P38060	HMGCL	Hydroxymethylglutaryl-CoA lyase, mitochondrial	1.27653	0.1805	0.0964092
Q9Z2I9	SUCB1	Succinyl-CoA ligase [ADP-forming] subunit beta, mitochondrial	0.116037	0.1806	0.0966355
P61226	RAP2B	Ras-related protein Rap-2b	-0.218427	0.1808	0.0968611
Q9DCG9	TR112	tRNA methyltransferase 112 homolog	0.286535	0.1809	0.0970858
P01869	IGH1M	Ig gamma-1 chain C region, membrane-bound form	0.462986	0.1811	0.0973099
P28656	NP1L1	Nucleosome assembly protein 1-like 1	0.186933	0.1823	0.0975359
Q8VCH0	THIKB	3-ketoacyl-CoA thiolase B, peroxisomal	-0.25277	0.1825	0.0977613
Q91XD2	LIMS2	LIM and senescent cell antigen-like-containing domain protein 2	-0.215967	0.1825	0.0979854
Q9Z1Q9	SYVC	Valyl-tRNA synthetase	-0.165972	0.1826	0.0982087
Q03311	CHLE	Cholinesterase	-0.254599	0.1827	0.0984311
Q05D44	IF2P	Eukaryotic translation initiation factor 5B	0.187496	0.1831	0.0986533
Q6URW6	MYH14	Myosin-14	-0.221455	0.1839	0.0988764
P70303	PYRG2	CTP synthase 2	0.292825	0.1841	0.099099
O54951	SEM6B	Semaphorin-6B	-0.219647	0.1841	0.0993203
Q0VAW7	ZF112	Zinc finger protein 112	-0.258916	0.1842	0.0995408
Q99LY9	NDUS5	NADH dehydrogenase [ubiquinone] iron-sulfur protein 5	1.38568	0.1847	0.0997614
Q9QZM3	CLCF1	Cardiotrophin-like cytokine factor 1	0.918599	0.1853	0.0999824
P70207	PLXA2	Plexin-A2	0.472623	0.1854	0.100203
P07758	A1AT1	Alpha-1-antitrypsin 1-1	0.190522	0.1865	0.100424
P47738	ALDH2	Aldehyde dehydrogenase, mitochondrial	-0.138498	0.1867	0.100646
P12787	COX5A	Cytochrome c oxidase subunit 5A, mitochondrial	0.139041	0.1869	0.100866
P23492	PNPH	Purine nucleoside phosphorylase	-0.14472	0.1872	0.101086
P63158	HMGB1	High mobility group protein B1	-0.248837	0.1893	0.101311
Q91YT0	NDUV1	NADH dehydrogenase [ubiquinone] flavoprotein 1, mitochondrial	0.155412	0.1895	0.101535
Q14DH7	ACSS3	Acyl-CoA synthetase short-chain family member 3, mitochondrial	0.196855	0.1899	0.101758
P48722	HS74L	Heat shock 70 kDa protein 4L	0.274606	0.1901	0.101982
Q8K310	MATR3	Matrin-3	-0.208086	0.192	0.102208
Q922Y1	UBXN1	UBX domain-containing protein 1	0.238215	0.192	0.102434
O88447	KLC1	Kinesin light chain 1	0.284821	0.192	0.102658
P30999	CTND1	Catenin delta-1	0.844349	0.1924	0.102883
Q9CR16	PPID	Peptidyl-prolyl cis-trans isomerase D	0.212632	0.1928	0.103107
Q91WP6	SPA3N	Serine protease inhibitor A3N	0.214322	0.1937	0.103332
Q9Z0F7	SYUG	Gamma-synuclein	-0.291705	0.1937	0.103557
B2RXC1	CD041	UPF0636 protein C4orf41 homolog	0.321086	0.1939	0.10378
Q9WUM5	SUCA	Succinyl-CoA ligase [GDP-forming] subunit alpha, mitochondrial	0.161303	0.1944	0.104004
O54962	BAF	Barrier-to-autointegration factor	0.572471	0.1946	0.104227
P24549	AL1A1	Retinal dehydrogenase 1	-0.138193	0.1947	0.104449
Q6ZWQ0	SYNE2	Nesprin-2	0.190628	0.1948	0.104671
Q8VE11	MTMR6	Myotubularin-related protein 6	0.280356	0.1955	0.104893
Q9JJG7	CABP8	Calcium-binding protein 8	-0.214428	0.1955	0.105114
Q8VDS8	STX18	Syntaxin-18	0.268366	0.1956	0.105334
P32020	NLTP	Non-specific lipid-transfer protein	-0.15704	0.1958	0.105554
Q8CIG8	ANM5	Protein arginine N-methyltransferase 5	0.287445	0.196	0.105773
Q8CDE2	CALI	Calicin	0.183144	0.1961	0.105991
Q61823	PDCD4	Programmed cell death protein 4	0.244004	0.1966	0.106209
Q7TMF3	NDUAC	NADH dehydrogenase [ubiquinone] 1 alpha subcomplex subunit 12	0.241055	0.1967	0.106427
Q9DBB8	DHDH	Trans-1,2-dihydrobenzene-1,2-diol dehydrogenase	0.170332	0.197	0.106644
Q9JK84	PAR6G	Partitioning defective 6 homolog gamma	-0.299173	0.197	0.10686
Q9CXT8	MPPB	Mitochondrial-processing peptidase subunit beta	0.285281	0.1974	0.107076
Q99KI0	ACON	Aconitate hydratase, mitochondrial	0.120341	0.1974	0.107291
Q9DCB8	ISCA2	Iron-sulfur cluster assembly 2 homolog, mitochondrial	0.157488	0.1976	0.107506
Q9CQR2	RS21	40S ribosomal protein S21	-0.151673	0.1977	0.107719
P62911	RL32	60S ribosomal protein L32	-0.377629	0.1988	0.107935
Q9CQ75	NDUA2	NADH dehydrogenase [ubiquinone] 1 alpha subcomplex subunit 2	0.206516	0.1992	0.10815
B2RR83	YTDC2	Probable ATP-dependent RNA helicase YTHDC2	-0.252092	0.1995	0.108365
Q9Z1G3	VATC1	V-type proton ATPase subunit C 1	0.255719	0.1996	0.108579
P31001	DESM	Desmin	-0.214805	0.1997	0.108793
P33622	APOC3	Apolipoprotein C-III	0.230475	0.1999	0.109005
P49138	MAPK2	MAP kinase-activated protein kinase 2	0.360781	0.2001	0.109218
Q61879	MYH10	Myosin-10	-0.179702	0.2002	0.109429
Q9CUL5	IQCA1	IQ and AAA domain-containing protein 1	0.197124	0.201	0.109642
P47911	RL6	60S ribosomal protein L6	-0.151432	0.2018	0.109855
P14148	RL7	60S ribosomal protein L7	-0.15011	0.2018	0.110067
P54726	RD23A	UV excision repair protein RAD23 homolog A	0.286799	0.2024	0.11028
Q62009	POSTN	Periostin	0.221834	0.2024	0.110492
P35330	ICAM2	Intercellular adhesion molecule 2	-0.223756	0.2025	0.110703
P22437	PGH1	Prostaglandin G/H synthase 1	-0.299069	0.2025	0.110913
Q924M7	MPI	Mannose-6-phosphate isomerase	0.136632	0.2029	0.111123
Q61586	GPAT1	Glycerol-3-phosphate acyltransferase 1, mitochondrial	0.280135	0.2031	0.111333
Q9Z247	FKBP9	Peptidyl-prolyl cis-trans isomerase FKBP9	-0.145584	0.2031	0.111541
Q60598	SRC8	Src substrate cortactin	0.993856	0.2038	0.11175
Q9D358	PPAC	Low molecular weight phosphotyrosine protein phosphatase	0.168888	0.2041	0.111959
Q9WTP6	KAD2	Adenylate kinase 2, mitochondrial	0.151062	0.2046	0.112168
Q8VDN2	AT1A1	Sodium/potassium-transporting ATPase subunit alpha-1	-0.147484	0.2054	0.112378
Q8VD65	PI3R4	Phosphoinositide 3-kinase regulatory subunit 4	0.444578	0.2055	0.112588
Q9CY50	SSRA	Translocon-associated protein subunit alpha	0.253922	0.2066	0.112798
Q8BGS7	CEPT1	Choline/ethanolaminephosphotransferase 1	0.773362	0.2075	0.11301
Q8K3K7	PLCB	1-acyl-sn-glycerol-3-phosphate acyltransferase beta	0.158999	0.2075	0.113221
Q8K1R3	PNPT1	Polyribonucleotide nucleotidyltransferase 1, mitochondrial	-0.318695	0.2082	0.113433
P19157	GSTP1	Glutathione S-transferase P 1	-0.128331	0.2083	0.113644
Q91VF2	HNMT	Histamine N-methyltransferase	0.139174	0.2086	0.113854
Q9Z1N2	ORC1	Origin recognition complex subunit 1	0.343153	0.2089	0.114064
P42125	D3D2	3,2-trans-enoyl-CoA isomerase, mitochondrial	0.127074	0.2097	0.114275
Q8R059	GALE	UDP-glucose 4-epimerase	0.67426	0.2099	0.114486
P47915	RL29	60S ribosomal protein L29	-0.170497	0.2102	0.114696
Q8K3C3	LZIC	Protein LZIC	0.314329	0.2102	0.114906
Q8K4R9	DLGP5	Disks large-associated protein 5	0.267028	0.2103	0.115115
Q9CR57	RL14	60S ribosomal protein L14	-0.173072	0.2103	0.115322
Q6P8X1	SNX6	Sorting nexin-6	-0.16731	0.2107	0.11553
Q00623	APOA1	Apolipoprotein A-I	0.117356	0.2111	0.115738
Q61696	HS71A	Heat shock 70 kDa protein 1A	-0.194206	0.2114	0.115946
P00405	COX2	Cytochrome c oxidase subunit 2	0.156109	0.2115	0.116152
Q922R8	PDIA6	Protein disulfide-isomerase A6	-0.136218	0.212	0.116359
Q61599	GDIR2	Rho GDP-dissociation inhibitor 2	-0.168173	0.2123	0.116566
P60867	RS20	40S ribosomal protein S20	-0.149413	0.2124	0.116772
Q920A7	AFG31	AFG3-like protein 1	-0.210062	0.2131	0.116979
Q01405	SC23A	Protein transport protein Sec23A	0.157134	0.2131	0.117185
O88492	PLIN4	Perilipin-4	-0.177127	0.2132	0.11739
P63073	IF4E	Eukaryotic translation initiation factor 4E	0.192686	0.2138	0.117596
Q9Z2M7	PMM2	Phosphomannomutase 2	0.487356	0.2139	0.1178
Q99MS7	EH1L1	EH domain-binding protein 1-like protein 1	0.244342	0.2161	0.118009
Q8CIM7	CP2DQ	Cytochrome P450 2D26	0.309235	0.2169	0.118219
Q3TYS2	CQ062	Uncharacterized protein C17orf62 homolog	0.570314	0.217	0.118427
P46412	GPX3	Glutathione peroxidase 3	0.168158	0.217	0.118635
Q8BK64	AHSA1	Activator of 90 kDa heat shock protein ATPase homolog 1	0.242402	0.2177	0.118844
Q99LP6	GRPE1	GrpE protein homolog 1, mitochondrial	0.127931	0.2177	0.119052
Q9WTR2	M3K6	Mitogen-activated protein kinase kinase kinase 6	0.403856	0.218	0.119259
Q9EPL9	ACOX3	Peroxisomal acyl-coenzyme A oxidase 3	0.610666	0.2181	0.119466
P22315	HEMH	Ferrochelatase, mitochondrial	-0.158775	0.2192	0.119674
Q9D0B6	CX026	UPF0368 protein Cxorf26 homolog	-0.271064	0.2193	0.119882
Q8C1E7	T120A	Transmembrane protein 120A	-0.158346	0.2193	0.120088
O08784	TCOF	Treacle protein	-0.223788	0.2207	0.120297
P61087	UBE2K	Ubiquitin-conjugating enzyme E2 K	0.249424	0.2208	0.120505
Q05793	PGBM	Basement membrane-specific heparan sulfate proteoglycan core protein	0.142178	0.2219	0.120715
Q5XJE5	LEO1	RNA polymerase-associated protein LEO1	0.196273	0.2219	0.120923
Q9D9L5	ACTT2	Actin-related protein T2	-0.303064	0.2224	0.121132
Q9Z2I0	LETM1	LETM1 and EF-hand domain-containing protein 1, mitochondrial	0.920812	0.2225	0.12134
Q6ZWY3	RS27L	40S ribosomal protein S27-like	-0.197298	0.2245	0.121552
Q8K183	PDXK	Pyridoxal kinase	0.160707	0.2247	0.121763
O70325	GPX41	Phospholipid hydroperoxide glutathione peroxidase, mitochondrial	0.383823	0.2249	0.121973
Q921M7	FA49B	Protein FAM49B	0.197494	0.2254	0.122184
Q9D0S9	HINT2	Histidine triad nucleotide-binding protein 2, mitochondrial	0.179421	0.2266	0.122396
Q8BP67	RL24	60S ribosomal protein L24	-0.142446	0.227	0.122608
P07214	SPRC	SPARC	0.206716	0.2275	0.12282
P00920	CAH2	Carbonic anhydrase 2	0.16388	0.2279	0.123033
P62858	RS28	40S ribosomal protein S28	-0.139709	0.228	0.123244
Q9D552	SPT17	Spermatogenesis-associated protein 17	0.33193	0.2281	0.123455
O70133	DHX9	ATP-dependent RNA helicase A	-0.149328	0.2281	0.123665
Q5SVL6	RPGP2	Rap1 GTPase-activating protein 2	0.328017	0.2284	0.123875
Q8K1X1	WDR11	WD repeat-containing protein 11	-1.46984	0.2286	0.124085
O55127	CP26A	Cytochrome P450 26A1	-0.272048	0.2293	0.124295
Q8VCN5	CGL	Cystathionine gamma-lyase	0.224368	0.2296	0.124505
Q9JHW9	AL1A3	Aldehyde dehydrogenase family 1 member A3	-0.230933	0.23	0.124714
P15656	FGF5	Fibroblast growth factor 5	-0.147212	0.2301	0.124923
Q6P9L4	UBP49	Ubiquitin carboxyl-terminal hydrolase 49	0.634722	0.2303	0.125132
Q80XL6	ACD11	Acyl-CoA dehydrogenase family member 11	-0.162882	0.2306	0.125341
Q99JR5	TINAL	Tubulointerstitial nephritis antigen-like	0.436066	0.2307	0.125548
P01631	KV2A7	Ig kappa chain V-II region 26-10	0.193652	0.231	0.125756
P62267	RS23	40S ribosomal protein S23	-0.147174	0.2318	0.125964
Q9CQI3	GMFB	Glia maturation factor beta	0.173353	0.2321	0.126172
Q9JK48	SHLB1	Endophilin-B1	0.142454	0.2326	0.126381
Q8R317	UBQL1	Ubiquilin-1	0.40349	0.2334	0.12659
Q6NZK8	PTPC1	Protein tyrosine phosphatase domain-containing protein 1	-0.404779	0.2335	0.126798
P51432	PLCB3	1-phosphatidylinositol-4,5-bisphosphate phosphodiesterase beta-3	0.197407	0.2336	0.127006
P46061	RAGP1	Ran GTPase-activating protein 1	0.291466	0.2336	0.127213
P15105	GLNA	Glutamine synthetase	-0.129407	0.2337	0.127419
Q8K2C9	HACD3	3-hydroxyacyl-CoA dehydratase 3	0.240849	0.2341	0.127626
Q8VDK1	NIT1	Nitrilase homolog 1	0.217828	0.2342	0.127831
B2RPV6	MMRN1	Multimerin-1	0.186146	0.2346	0.128037
Q9WTR0	MMP16	Matrix metalloproteinase-16	0.204115	0.2348	0.128242
P97372	PSME2	Proteasome activator complex subunit 2	-0.212449	0.2352	0.128448
Q91VW3	SH3L3	SH3 domain-binding glutamic acid-rich-like protein 3	-0.147653	0.2352	0.128652
Q9D855	QCR7	Cytochrome b-c1 complex subunit 7	0.146293	0.2354	0.128856
Q6GQT9	NOMO1	Nodal modulator 1	-0.173851	0.2354	0.12906
Q80X19	COEA1	Collagen alpha-1(XIV) chain	-0.205749	0.2355	0.129262
P27577	ETS1	Protein C-ets-1	-0.183224	0.236	0.129465
Q6ZWZ2	UB2R2	Ubiquitin-conjugating enzyme E2 R2	0.212721	0.236	0.129667
P97315	CSRP1	Cysteine and glycine-rich protein 1	-0.19464	0.2361	0.129869
P14115	RL27A	60S ribosomal protein L27a	-0.203165	0.2361	0.13007
Q9QZQ1	AFAD	Afadin	0.169342	0.2364	0.13027
Q99J56	DERL1	Derlin-1	0.390685	0.2365	0.13047
Q9CZR2	NALD2	N-acetylated-alpha-linked acidic dipeptidase 2	-0.149587	0.2371	0.130671
O35682	MYADM	Myeloid-associated differentiation marker	-0.258299	0.2376	0.130871
Q8CII8	SYNE4	Nesprin-4	1.03553	0.238	0.131072
P56565	S10A1	Protein S100-A1	-0.185759	0.2384	0.131273
Q91VC3	IF4A3	Eukaryotic initiation factor 4A-III	-0.290788	0.2396	0.131475
Q9D6J6	NDUV2	NADH dehydrogenase [ubiquinone] flavoprotein 2, mitochondrial	0.132603	0.24	0.131677
Q80SY5	PR38B	Pre-mRNA-splicing factor 38B	-0.304741	0.2401	0.131878
A6H584	CO6A5	Collagen alpha-5(VI) chain	-0.253548	0.2402	0.132079
P97467	AMD	Peptidyl-glycine alpha-amidating monooxygenase	0.27121	0.2402	0.13228
P45952	ACADM	Medium-chain specific acyl-CoA dehydrogenase, mitochondrial	0.0998975	0.241	0.132481
Q3UNH4	GRIN1	G protein-regulated inducer of neurite outgrowth 1	1.30448	0.241	0.132681
P48962	ADT1	ADP/ATP translocase 1	-0.140863	0.2421	0.132882
O70218	HMX1	Homeobox protein HMX1	0.380185	0.2426	0.133084
Q9JI78	NGLY1	Peptide-N(4)-(N-acetyl-beta-glucosaminyl)asparagine amidase	0.842509	0.2432	0.133286
Q32NY4	CNNM3	Metal transporter CNNM3	-0.304467	0.2436	0.133488
Q08879	FBLN1	Fibulin-1	-0.138301	0.2442	0.13369
Q9JHW2	NIT2	Omega-amidase NIT2	-0.19297	0.2445	0.133893
P51150	RAB7A	Ras-related protein Rab-7a	-0.127072	0.2445	0.134094
Q9CR13	CG055	UPF0562 protein C7orf55 homolog	0.173572	0.2446	0.134295
P29416	HEXA	Beta-hexosaminidase subunit alpha	-0.181962	0.2449	0.134496
Q6P1B1	XPP1	Xaa-Pro aminopeptidase 1	0.190833	0.2449	0.134696
Q06890	CLUS	Clusterin	-0.127399	0.245	0.134895
P35278	RAB5C	Ras-related protein Rab-5C	-0.17828	0.2452	0.135094
Q5SUV2	MYBPP	MYCBP-associated protein	0.494366	0.2454	0.135293
Q71LX4	TLN2	Talin-2	0.115759	0.2455	0.135491
O88940	MUSC	Musculin	0.300797	0.2456	0.135689
Q62418	DBNL	Drebrin-like protein	0.571865	0.2457	0.135886
Q9ES97	RTN3	Reticulon-3	-0.132455	0.2461	0.136083
P04945	KV6AB	Ig kappa chain V-VI region NQ2-6.1	0.780414	0.2462	0.13628
O70552	BTG4	Protein BTG4	0.663749	0.2463	0.136476
Q61234	SNTA1	Alpha-1-syntrophin	0.175183	0.2468	0.136672
Q80U38	KHNYN	Protein KHNYN	-0.153044	0.247	0.136868
Q9CWV1	MCM8	DNA replication licensing factor MCM8	-0.221838	0.2472	0.137064
Q8C8R3	ANK2	Ankyrin-2	0.223281	0.2477	0.13726
P08122	CO4A2	Collagen alpha-2(IV) chain	0.401189	0.2489	0.137457
Q9D1R9	RL34	60S ribosomal protein L34	-0.181191	0.249	0.137654
Q8R3N1	NOP14	Nucleolar protein 14	0.39273	0.2491	0.13785
P62814	VATB2	V-type proton ATPase subunit B, brain isoform	0.129381	0.2501	0.138047
P10639	THIO	Thioredoxin	-0.135225	0.2502	0.138244
P62754	RS6	40S ribosomal protein S6	-0.150362	0.2508	0.138441
P29594	CASP2	Caspase-2	-0.224783	0.2509	0.138638
P49443	PPM1A	Protein phosphatase 1A	-0.159394	0.2515	0.138835
Q99K51	PLST	Plastin-3	0.154027	0.2517	0.139031
Q9JHU2	PALMD	Palmdelphin	0.163717	0.2517	0.139227
P21812	MCPT4	Mast cell protease 4	-0.16892	0.252	0.139423
P70404	IDHG1	Isocitrate dehydrogenase [NAD] subunit gamma 1, mitochondrial	0.146991	0.2541	0.139622
Q9WTP7	KAD3	GTP:AMP phosphotransferase, mitochondrial	0.109668	0.2547	0.139821
P15327	PMGE	Bisphosphoglycerate mutase	0.137501	0.2547	0.140019
Q8BX70	VP13C	Vacuolar protein sorting-associated protein 13C	-0.113054	0.2554	0.140218
P52503	NDUS6	NADH dehydrogenase [ubiquinone] iron-sulfur protein 6, mitochondrial	0.711684	0.2557	0.140417
O08997	ATOX1	Copper transport protein ATOX1	0.13706	0.2562	0.140616
P16092	FGFR1	Basic fibroblast growth factor receptor 1	-0.247939	0.2572	0.140816
Q6PDN3	MYLK	Myosin light chain kinase, smooth muscle	-0.171197	0.2576	0.141016
Q61553	FSCN1	Fascin	0.125144	0.2577	0.141215
P61222	ABCE1	ATP-binding cassette sub-family E member 1	-0.436248	0.2579	0.141415
O54998	FKBP7	Peptidyl-prolyl cis-trans isomerase FKBP7	0.206197	0.2582	0.141613
Q8BSF4	PISD	Phosphatidylserine decarboxylase proenzyme	-0.129001	0.2583	0.141812
Q9WTW5	S22A3	Solute carrier family 22 member 3	-0.21785	0.2584	0.14201
Q9Z0N2	IF2H	Eukaryotic translation initiation factor 2 subunit 3, Y-linked	0.762995	0.2585	0.142207
Q9CQF9	PCYOX	Prenylcysteine oxidase	0.180882	0.2585	0.142404
Q62465	VAT1	Synaptic vesicle membrane protein VAT-1 homolog	-0.119192	0.2586	0.1426
P61079	UB2D3	Ubiquitin-conjugating enzyme E2 D3	-0.143636	0.2594	0.142797
P22599	A1AT2	Alpha-1-antitrypsin 1-2	0.166311	0.2597	0.142994
Q9WUR2	PECI	Peroxisomal 3,2-trans-enoyl-CoA isomerase	-0.197956	0.26	0.143191
Q60973	RBBP7	Histone-binding protein RBBP7	-0.262677	0.2601	0.143387
Q8BMG7	RBGPR	Rab3 GTPase-activating protein non-catalytic subunit	0.175941	0.2615	0.143585
P61022	CHP1	Calcium-binding protein p22	-0.110772	0.2624	0.143783
Q8R1B4	EIF3C	Eukaryotic translation initiation factor 3 subunit C	-0.151075	0.263	0.143982
P84091	AP2M1	AP-2 complex subunit mu	-0.117817	0.2633	0.144181
P14106	C1QB	Complement C1q subcomponent subunit B	-0.214164	0.264	0.144381
Q99LB2	DHRS4	Dehydrogenase/reductase SDR family member 4	-0.149647	0.2641	0.14458
Q62167	DDX3X	ATP-dependent RNA helicase DDX3X	0.152575	0.2642	0.144778
Q9R1P3	PSB2	Proteasome subunit beta type-2	-0.155621	0.266	0.144979
Q8K010	OPLA	5-oxoprolinase	-0.147579	0.266	0.145179
Q80UU9	PGRC2	Membrane-associated progesterone receptor component 2	-0.109654	0.2662	0.145378
P62702	RS4X	40S ribosomal protein S4, X isoform	-0.129668	0.2664	0.145578
Q80XC3	US6NL	USP6 N-terminal-like protein	0.1536	0.2675	0.145778
Q3UW53	NIBAN	Protein Niban	-0.145646	0.2684	0.14598
Q9ERS2	NDUAD	NADH dehydrogenase [ubiquinone] 1 alpha subcomplex subunit 13	0.130793	0.2685	0.14618
Q99JY0	ECHB	Trifunctional enzyme subunit beta, mitochondrial	0.104772	0.2686	0.146381
P70452	STX4	Syntaxin-4	0.245211	0.2688	0.146581
P31428	DPEP1	Dipeptidase 1	-0.235316	0.2693	0.146781
Q9CY66	GAR1	H/ACA ribonucleoprotein complex subunit 1	-0.391454	0.2694	0.146981
P62821	RAB1A	Ras-related protein Rab-1A	-0.141712	0.2694	0.14718
P70336	ROCK2	Rho-associated protein kinase 2	-0.164507	0.2695	0.147378
Q99MK8	ARBK1	Beta-adrenergic receptor kinase 1	0.336402	0.2703	0.147578
P61211	ARL1	ADP-ribosylation factor-like protein 1	0.204773	0.2704	0.147776
P06745	G6PI	Glucose-6-phosphate isomerase	0.106829	0.2706	0.147975
Q9D1M0	SEC13	Protein SEC13 homolog	0.155177	0.2707	0.148173
O08553	DPYL2	Dihydropyrimidinase-related protein 2	-0.103121	0.2718	0.148372
Q3TZZ7	ESYT2	Extended synaptotagmin-2	0.124965	0.272	0.148571
Q3TYG6	F179A	Protein FAM179A	2.53464	0.2727	0.14877
Q3U1D0	LINES	Protein Lines homolog	0.221408	0.2729	0.148969
Q80TR1	LPHN1	Latrophilin-1	-0.201327	0.2732	0.149168
O89053	COR1A	Coronin-1A	-0.355834	0.2735	0.149366
Q80XU3	NUCKS	Nuclear ubiquitous casein and cyclin-dependent kinases substrate	-0.196021	0.2735	0.149564
Q3U0S6	RAIN	Ras-interacting protein 1	-0.129866	0.2739	0.149762
Q8BP92	RCN2	Reticulocalbin-2	-0.119045	0.274	0.14996
Q6WVG3	KCD12	BTB/POZ domain-containing protein KCTD12	-0.163544	0.2741	0.150157
Q99MI1	RB6I2	ELKS/Rab6-interacting/CAST family member 1	-0.222586	0.2752	0.150355
O88685	PRS6A	26S protease regulatory subunit 6A	0.170524	0.2755	0.150553
Q8BMS1	ECHA	Trifunctional enzyme subunit alpha, mitochondrial	0.12513	0.2759	0.150751
P28271	ACOC	Cytoplasmic aconitate hydratase	-0.102043	0.276	0.150948
Q8CE90	MP2K7	Dual specificity mitogen-activated protein kinase kinase 7	0.585851	0.276	0.151145
Q99J93	IFM2	Interferon-induced transmembrane protein 2	-0.494588	0.2763	0.151342
Q62219	TGFI1	Transforming growth factor beta-1-induced transcript 1 protein	0.221368	0.2766	0.151539
Q08274	DMWD	Dystrophia myotonica WD repeat-containing protein	-0.351111	0.2767	0.151735
P35922	FMR1	Fragile X mental retardation protein 1 homolog	0.396523	0.2771	0.151931
Q3UVL4	FFR	Protein fat-free homolog	-0.370535	0.2772	0.152127
Q924H5	RA51C	DNA repair protein RAD51 homolog 3	0.540304	0.2773	0.152322
Q9WUL7	ARL3	ADP-ribosylation factor-like protein 3	0.141386	0.2775	0.152517
P70268	PKN1	Serine/threonine-protein kinase N1	-0.181919	0.2782	0.152713
Q80XQ2	TBCD5	TBC1 domain family member 5	0.961633	0.2789	0.152909
Q62230	SN	Sialoadhesin	0.427976	0.2799	0.153105
Q8CEE7	RDH13	Retinol dehydrogenase 13	0.376268	0.2803	0.153302
P20029	GRP78	78 kDa glucose-regulated protein	-0.0936974	0.2804	0.153499
B1AY13	UBP24	Ubiquitin carboxyl-terminal hydrolase 24	-0.238962	0.2811	0.153696
P12970	RL7A	60S ribosomal protein L7a	-0.119771	0.2816	0.153893
Q925F2	ESAM	Endothelial cell-selective adhesion molecule	-0.252926	0.2817	0.154089
O08688	CAN5	Calpain-5	0.199004	0.2819	0.154286
P07724	ALBU	Serum albumin	-0.136612	0.2826	0.154483
P70302	STIM1	Stromal interaction molecule 1	-0.150865	0.283	0.154679
Q9DBF1	AL7A1	Alpha-aminoadipic semialdehyde dehydrogenase	-0.120105	0.2836	0.154876
P20060	HEXB	Beta-hexosaminidase subunit beta	-0.256922	0.2837	0.155073
Q9JIX8	ACINU	Apoptotic chromatin condensation inducer in the nucleus	-0.164993	0.2845	0.15527
Q60855	RIPK1	Receptor-interacting serine/threonine-protein kinase 1	-0.229082	0.2851	0.155468
Q91ZE0	TMLH	Trimethyllysine dioxygenase, mitochondrial	0.176625	0.2854	0.155666
P60843	IF4A1	Eukaryotic initiation factor 4A-I	0.157279	0.2864	0.155864
Q8BJ56	PLPL2	Patatin-like phospholipase domain-containing protein 2	-0.141501	0.2866	0.156062
Q8VBT9	ASPC1	Tether containing UBX domain for GLUT4	-0.20095	0.2866	0.156259
Q3U7R1	ESYT1	Extended synaptotagmin-1	-0.1275	0.287	0.156457
P84096	RHOG	Rho-related GTP-binding protein RhoG	-0.420272	0.2876	0.156655
P97351	RS3A	40S ribosomal protein S3a	-0.104178	0.2876	0.156852
P41230	KDM5C	Lysine-specific demethylase 5C	0.178076	0.2877	0.157049
Q9DCT8	CRIP2	Cysteine-rich protein 2	0.213513	0.288	0.157245
Q8BMC3	SHC2	SHC-transforming protein 2	0.223746	0.2881	0.157442
Q9Z0S1	BPNT1	3'(2'),5'-bisphosphate nucleotidase 1	-0.167712	0.2883	0.157637
P46978	STT3A	Dolichyl-diphosphooligosaccharide--protein glycosyltransferase subunit STT3A	-0.207041	0.2884	0.157833
Q64514	TPP2	Tripeptidyl-peptidase 2	0.245351	0.289	0.158029
O08810	U5S1	116 kDa U5 small nuclear ribonucleoprotein component	0.615594	0.289	0.158224
Q64674	SPEE	Spermidine synthase	0.184428	0.2892	0.158419
Q8CE13	CCD17	Coiled-coil domain-containing protein 17	-0.378411	0.2897	0.158614
Q8BND5	QSOX1	Sulfhydryl oxidase 1	0.17999	0.2898	0.158808
P51174	ACADL	Long-chain specific acyl-CoA dehydrogenase, mitochondrial	0.124297	0.29	0.159003
P56213	ALR	FAD-linked sulfhydryl oxidase ALR	0.586107	0.2905	0.159197
Q9CQA3	DHSB	Succinate dehydrogenase [ubiquinone] iron-sulfur subunit, mitochondrial	0.107321	0.2905	0.159391
Q673H1	TUSC1	Tumor suppressor candidate gene 1 protein homolog	0.334172	0.2916	0.159586
Q64521	GPDM	Glycerol-3-phosphate dehydrogenase, mitochondrial	0.123163	0.2942	0.159785
Q9CX00	IST1	IST1 homolog	0.179637	0.2942	0.159982
Q61543	GSLG1	Golgi apparatus protein 1	-0.36073	0.2942	0.160179
Q6PHZ2	KCC2D	Calcium/calmodulin-dependent protein kinase type II subunit delta	0.136264	0.2944	0.160376
Q60648	SAP3	Ganglioside GM2 activator	-0.121455	0.2948	0.160573
Q99MR6	SRRT	Serrate RNA effector molecule homolog	-0.136183	0.295	0.160769
Q2VLH6	C163A	Scavenger receptor cysteine-rich type 1 protein M130	-0.188754	0.2953	0.160966
Q9WV68	DECR2	Peroxisomal 2,4-dienoyl-CoA reductase	0.220509	0.2955	0.161162
P31324	KAP3	cAMP-dependent protein kinase type II-beta regulatory subunit	0.110571	0.2959	0.161358
Q61730	IL1AP	Interleukin-1 receptor accessory protein	0.139772	0.2962	0.161554
O35658	C1QBP	Complement component 1 Q subcomponent-binding protein, mitochondrial	1.29124	0.2965	0.16175
P62196	PRS8	26S protease regulatory subunit 8	-0.12903	0.2966	0.161945
O35855	BCAT2	Branched-chain-amino-acid aminotransferase, mitochondrial	-0.110786	0.2967	0.16214
Q9EST5	AN32B	Acidic leucine-rich nuclear phosphoprotein 32 family member B	0.742914	0.2968	0.162335
Q9WUB3	PYGM	Glycogen phosphorylase, muscle form	-0.198725	0.2982	0.162531
P32921	SYWC	Tryptophanyl-tRNA synthetase, cytoplasmic	0.148337	0.299	0.162728
Q8C0N2	GPAT3	Glycerol-3-phosphate acyltransferase 3	-0.135665	0.299	0.162924
Q99L45	IF2B	Eukaryotic translation initiation factor 2 subunit 2	0.132446	0.2994	0.16312
Q8R2Y0	ABHD6	Monoacylglycerol lipase ABHD6	0.233394	0.2996	0.163316
Q99LD8	DDAH2	N(G),N(G)-dimethylarginine dimethylaminohydrolase 2	-0.339362	0.3005	0.163512
P61148	FGF1	Heparin-binding growth factor 1	0.29309	0.3014	0.163709
O70152	DPM1	Dolichol-phosphate mannosyltransferase	0.612112	0.302	0.163907
Q9D168	INT12	Integrator complex subunit 12	-0.83536	0.3026	0.164105
Q9Z1Q5	CLIC1	Chloride intracellular channel protein 1	-0.234336	0.3034	0.164303
P47955	RLA1	60S acidic ribosomal protein P1	0.287399	0.3036	0.164501
P01942	HBA	Hemoglobin subunit alpha	0.13549	0.3039	0.164699
P63328	PP2BA	Serine/threonine-protein phosphatase 2B catalytic subunit alpha isoform	-0.181064	0.3045	0.164898
O35350	CAN1	Calpain-1 catalytic subunit	0.277436	0.3047	0.165096
Q9D6Y9	GLGB	1,4-alpha-glucan-branching enzyme	0.130223	0.3048	0.165293
Q9DBB9	CPN2	Carboxypeptidase N subunit 2	0.129997	0.3053	0.165491
Q8BJD1	ITIH5	Inter-alpha-trypsin inhibitor heavy chain H5	0.126759	0.3054	0.165688
Q5FWH6	ARHGF	Rho guanine nucleotide exchange factor 15	0.949421	0.3057	0.165886
P37804	TAGL	Transgelin	-0.238007	0.3058	0.166082
P70670	NACAM	Nascent polypeptide-associated complex subunit alpha, muscle-specific form	0.119173	0.3061	0.166279
P51863	VA0D1	V-type proton ATPase subunit d 1	0.331567	0.3065	0.166476
Q8R5C5	ACTY	Beta-centractin	0.645732	0.3065	0.166672
Q810B6	ANFY1	Ankyrin repeat and FYVE domain-containing protein 1	-0.15889	0.307	0.166868
P50608	FMOD	Fibromodulin	-0.174842	0.3074	0.167064
Q9WUU7	CATZ	Cathepsin Z	-0.126951	0.3077	0.167261
P34884	MIF	Macrophage migration inhibitory factor	-0.178269	0.308	0.167457
Q9WUM4	COR1C	Coronin-1C	0.158786	0.3083	0.167652
Q9CXW4	RL11	60S ribosomal protein L11	-0.218206	0.3085	0.167848
P28653	PGS1	Biglycan	0.124513	0.3088	0.168044
Q9EP69	SAC1	Phosphatidylinositide phosphatase SAC1	-0.122233	0.3095	0.168239
Q9QUI0	RHOA	Transforming protein RhoA	-0.0968866	0.3106	0.168436
Q9Z1X4	ILF3	Interleukin enhancer-binding factor 3	-0.271404	0.3108	0.168633
Q3TAP4	YK046	Uncharacterized protein DKFZp761E198 homolog	-0.149206	0.3111	0.16883
P41317	MBL2	Mannose-binding protein C	0.205928	0.3111	0.169025
P15306	TRBM	Thrombomodulin	-0.332818	0.3114	0.169221
P06728	APOA4	Apolipoprotein A-IV	0.106826	0.3119	0.169417
O35074	PTGIS	Prostacyclin synthase	0.227665	0.3119	0.169613
P97298	PEDF	Pigment epithelium-derived factor	0.167959	0.3121	0.169808
P39447	ZO1	Tight junction protein ZO-1	-0.115366	0.3122	0.170003
Q91WS0	CISD1	CDGSH iron-sulfur domain-containing protein 1	0.238066	0.3124	0.170197
P69744	TRPV5	Transient receptor potential cation channel subfamily V member 5	-0.231	0.3125	0.170391
Q01149	CO1A2	Collagen alpha-2(I) chain	0.271087	0.3125	0.170585
Q9R0P5	DEST	Destrin	0.186004	0.3131	0.170779
Q99JY8	LPP3	Lipid phosphate phosphohydrolase 3	-0.167118	0.315	0.170975
Q3THE2	ML12B	Myosin regulatory light chain 12B	0.225211	0.315	0.17117
Q9CQJ8	NDUB9	NADH dehydrogenase [ubiquinone] 1 beta subcomplex subunit 9	0.151156	0.3151	0.171365
Q9QXB9	DRG2	Developmentally-regulated GTP-binding protein 2	0.345463	0.3154	0.17156
P25911	LYN	Tyrosine-protein kinase Lyn	0.366409	0.3155	0.171755
Q8BHA3	DTD2	Probable D-tyrosyl-tRNA(Tyr) deacylase 2	-0.139265	0.3166	0.17195
P56135	ATPK	ATP synthase subunit f, mitochondrial	0.131345	0.3173	0.172146
Q99K85	SERC	Phosphoserine aminotransferase	-0.109741	0.3177	0.172342
P35980	RL18	60S ribosomal protein L18	-0.112258	0.3198	0.17254
P60122	RUVB1	RuvB-like 1	-0.248386	0.3201	0.172738
Q99LC5	ETFA	Electron transfer flavoprotein subunit alpha, mitochondrial	0.1115	0.3202	0.172936
Q60931	VDAC3	Voltage-dependent anion-selective channel protein 3	0.183461	0.3202	0.173133
Q9CZ42	CARKD	Carbohydrate kinase domain-containing protein	0.144576	0.3202	0.17333
P84244	H33	Histone H3.3	-0.12789	0.3211	0.173527
Q8BMA6	SRP68	Signal recognition particle 68 kDa protein	-0.261316	0.3212	0.173724
Q69ZX8	ABLM3	Actin-binding LIM protein 3	0.280627	0.3214	0.173921
Q9Z2G9	HTAI2	Oxidoreductase HTATIP2	0.177458	0.3217	0.174117
P14602	HSPB1	Heat shock protein beta-1	-0.112254	0.3224	0.174314
P46471	PRS7	26S protease regulatory subunit 7	-0.13177	0.3226	0.174511
P47968	RPIA	Ribose-5-phosphate isomerase	0.133998	0.3226	0.174707
P62334	PRS10	26S protease regulatory subunit 10B	-0.11425	0.3237	0.174904
Q9JHR7	IDE	Insulin-degrading enzyme	-0.149607	0.324	0.175101
Q61166	MARE1	Microtubule-associated protein RP/EB family member 1	0.174171	0.3241	0.175297
P55772	ENTP1	Ectonucleoside triphosphate diphosphohydrolase 1	-0.199197	0.3244	0.175494
P49891	ST1E1	Estrogen sulfotransferase, testis isoform	0.679866	0.3247	0.17569
O35114	SCRB2	Lysosome membrane protein 2	0.561833	0.3251	0.175886
Q9CXA2	PRCM	Probable proline racemase	-0.214111	0.3254	0.176083
Q9D6J5	NDUB8	NADH dehydrogenase [ubiquinone] 1 beta subcomplex subunit 8, mitochondrial	0.302937	0.3254	0.176278
Q9QZZ6	DERM	Dermatopontin	-0.143705	0.3256	0.176474
Q91WC3	ACSL6	Long-chain-fatty-acid--CoA ligase 6	-0.15257	0.3258	0.176669
P00493	HPRT	Hypoxanthine-guanine phosphoribosyltransferase	0.100669	0.3265	0.176865
Q8CCJ3	UFL1	E3 UFM1-protein ligase 1	-0.153246	0.3266	0.17706
Q8K2B3	DHSA	Succinate dehydrogenase [ubiquinone] flavoprotein subunit, mitochondrial	0.0933897	0.3266	0.177255
Q8BFZ3	ACTBL	Beta-actin-like protein 2	0.157056	0.328	0.177451
Q8BTW9	PAK4	Serine/threonine-protein kinase PAK 4	0.785261	0.3281	0.177646
Q6Q899	DDX58	Probable ATP-dependent RNA helicase DDX58	0.178167	0.3285	0.177842
Q05722	CO9A1	Collagen alpha-1(IX) chain	0.177989	0.3286	0.178037
Q99NA9	PCGF6	Polycomb group RING finger protein 6	-0.164688	0.3291	0.178233
Q9QZ06	TOLIP	Toll-interacting protein	0.515677	0.3292	0.178428
Q64442	DHSO	Sorbitol dehydrogenase	0.114637	0.3293	0.178622
Q6ZWV7	RL35	60S ribosomal protein L35	-0.138804	0.3296	0.178817
P42925	PXMP2	Peroxisomal membrane protein 2	-0.165321	0.33	0.179011
Q8CG72	ARHL2	Poly(ADP-ribose) glycohydrolase ARH3	-0.133997	0.3303	0.179206
P19001	K1C19	Keratin, type I cytoskeletal 19	-0.145827	0.331	0.179401
Q91ZX7	LRP1	Prolow-density lipoprotein receptor-related protein 1	-0.111591	0.3312	0.179595
Q9QY76	VAPB	Vesicle-associated membrane protein-associated protein B	-0.115614	0.3314	0.17979
Q9Z1Q2	ABHGA	Abhydrolase domain-containing protein 16A	0.139089	0.3314	0.179984
Q9Z0W3	NU160	Nuclear pore complex protein Nup160	0.22476	0.3317	0.180177
Q8BME9	CBLN4	Cerebellin-4	-0.154526	0.332	0.180371
P10107	ANXA1	Annexin A1	0.114731	0.3322	0.180564
Q8VCW8	ACSF2	Acyl-CoA synthetase family member 2, mitochondrial	0.122344	0.3325	0.180758
Q8BRF7	SCFD1	Sec1 family domain-containing protein 1	0.133863	0.3326	0.180951
Q9Z2V4	PCKGC	Phosphoenolpyruvate carboxykinase, cytosolic [GTP]	0.120842	0.3326	0.181143
Q62261	SPTB2	Spectrin beta chain, brain 1	-0.0907289	0.3327	0.181335
O89023	TPP1	Tripeptidyl-peptidase 1	-0.106504	0.3331	0.181527
Q9JMA1	UBP14	Ubiquitin carboxyl-terminal hydrolase 14	0.272362	0.3335	0.181719
P22907	HEM3	Porphobilinogen deaminase	-0.126456	0.3338	0.181911
Q91VM9	IPYR2	Inorganic pyrophosphatase 2, mitochondrial	0.161678	0.3346	0.182104
O35737	HNRH1	Heterogeneous nuclear ribonucleoprotein H	0.261666	0.3346	0.182296
P31230	AIMP1	Aminoacyl tRNA synthase complex-interacting multifunctional protein 1	0.135023	0.3352	0.182488
Q9CQD1	RAB5A	Ras-related protein Rab-5A	0.189349	0.3356	0.182681
P46638	RB11B	Ras-related protein Rab-11B	-0.146875	0.3356	0.182873
Q8BFR5	EFTU	Elongation factor Tu, mitochondrial	0.111849	0.3359	0.183064
Q9DCL9	PUR6	Multifunctional protein ADE2	-0.127334	0.3362	0.183256
Q6PDH0	PHLB1	Pleckstrin homology-like domain family B member 1	0.329576	0.3363	0.183447
O35083	PLCA	1-acyl-sn-glycerol-3-phosphate acyltransferase alpha	0.150524	0.3369	0.183639
Q9DAR7	DCPS	Scavenger mRNA-decapping enzyme DcpS	-0.224959	0.337	0.18383
Q9JHU9	INO1	Inositol-3-phosphate synthase 1	-0.205116	0.3377	0.184022
Q9DC70	NDUS7	NADH dehydrogenase [ubiquinone] iron-sulfur protein 7, mitochondrial	-0.136959	0.3377	0.184213
P35585	AP1M1	AP-1 complex subunit mu-1	0.215851	0.3379	0.184404
Q9D0R2	SYTC	Threonyl-tRNA synthetase, cytoplasmic	0.679623	0.3384	0.184595
Q5F2F2	ABH15	Abhydrolase domain-containing protein 15	-0.212882	0.3391	0.184786
Q9CW42	MOSC1	MOSC domain-containing protein 1, mitochondrial	0.14822	0.3398	0.184978
Q6DID5	MUM1	PWWP domain-containing protein MUM1	0.172659	0.3399	0.18517
P07759	SPA3K	Serine protease inhibitor A3K	0.132487	0.3406	0.185362
P51855	GSHB	Glutathione synthetase	-0.147908	0.3407	0.185553
Q8C729	F126B	Protein FAM126B	0.229409	0.3408	0.185744
Q64012	RALY	RNA-binding protein Raly	-0.119202	0.341	0.185935
Q9DAW6	PRP4	U4/U6 small nuclear ribonucleoprotein Prp4	-0.13855	0.3415	0.186126
O08917	FLOT1	Flotillin-1	-0.124859	0.3416	0.186317
P68510	1433F	14-3-3 protein eta	-0.185624	0.3421	0.186508
Q61335	BAP31	B-cell receptor-associated protein 31	-0.109472	0.3429	0.1867
P17125	TGFB3	Transforming growth factor beta-3	0.353191	0.343	0.186891
P25799	NFKB1	Nuclear factor NF-kappa-B p105 subunit	0.137451	0.3433	0.187082
P50518	VATE1	V-type proton ATPase subunit E 1	0.117845	0.3434	0.187272
P01663	KV3AB	Ig kappa chain V-III region PC 4050	-0.182956	0.3436	0.187463
P24547	IMDH2	Inosine-5'-monophosphate dehydrogenase 2	-0.271386	0.3438	0.187653
Q61239	FNTA	Protein farnesyltransferase/geranylgeranyltransferase type-1 subunit alpha	0.111771	0.3439	0.187843
Q8CCM6	TI21L	TIM21-like protein, mitochondrial	-0.132167	0.3441	0.188032
O55234	PSB5	Proteasome subunit beta type-5	0.111708	0.3443	0.188222
Q4ACU6	SHAN3	SH3 and multiple ankyrin repeat domains protein 3	0.120113	0.3446	0.188411
P63024	VAMP3	Vesicle-associated membrane protein 3	0.665937	0.3446	0.1886
Q99K41	EMIL1	EMILIN-1	0.210448	0.3451	0.188789
Q99L43	CDS2	Phosphatidate cytidylyltransferase 2	-0.11053	0.3453	0.188978
Q62086	PON2	Serum paraoxonase/arylesterase 2	-0.133817	0.3455	0.189166
P60755	MDGA2	MAM domain-containing glycosylphosphatidylinositol anchor protein 2	0.181132	0.3465	0.189356
Q9DBL7	COASY	Bifunctional coenzyme A synthase	0.137372	0.3469	0.189545
Q8BH79	ANO10	Anoctamin-10	0.108017	0.3472	0.189734
Q61247	A2AP	Alpha-2-antiplasmin	0.117221	0.3473	0.189923
O88327	CTNL1	Alpha-catulin	-0.173493	0.3475	0.190112
Q8BVA5	CB043	UPF0554 protein C2orf43 homolog	0.150828	0.3477	0.1903
P63168	DYL1	Dynein light chain 1, cytoplasmic	-0.107374	0.3478	0.190489
P59325	IF5	Eukaryotic translation initiation factor 5	0.109624	0.348	0.190676
Q3UMT1	PP12C	Protein phosphatase 1 regulatory subunit 12C	-0.402844	0.3482	0.190864
Q9WVJ2	PSD13	26S proteasome non-ATPase regulatory subunit 13	-0.119995	0.3482	0.191052
Q9D3B1	HACD2	3-hydroxyacyl-CoA dehydratase 2	-0.171922	0.3484	0.191239
Q9CR62	M2OM	Mitochondrial 2-oxoglutarate/malate carrier protein	0.12031	0.3485	0.191425
Q9CRD2	TTC35	Tetratricopeptide repeat protein 35	-0.160143	0.3488	0.191612
Q9Z0X1	AIFM1	Apoptosis-inducing factor 1, mitochondrial	0.104445	0.3489	0.191798
P68037	UB2L3	Ubiquitin-conjugating enzyme E2 L3	0.183701	0.3492	0.191985
Q9JHD2	KAT2A	Histone acetyltransferase KAT2A	0.219207	0.3495	0.192171
P08752	GNAI2	Guanine nucleotide-binding protein G(i) subunit alpha-2	-0.0999222	0.3496	0.192357
Q8CHR6	DPYD	Dihydropyrimidine dehydrogenase [NADP+]	0.233928	0.35	0.192543
P55937	GOGA3	Golgin subfamily A member 3	0.129445	0.3507	0.192729
P03987	IGHG3	Ig gamma-3 chain C region	0.162393	0.351	0.192915
Q9CZX0	ELP3	Elongator complex protein 3	-0.217257	0.3511	0.193101
Q62422	OSTF1	Osteoclast-stimulating factor 1	0.14746	0.3512	0.193287
Q8K4F5	ABHDB	Abhydrolase domain-containing protein 11	0.20393	0.3513	0.193472
P01634	KV5A2	Ig kappa chain V-V region MOPC 21	0.245685	0.3518	0.193657
Q8K370	ACD10	Acyl-CoA dehydrogenase family member 10	0.133209	0.352	0.193842
P02762	MUP6	Major urinary protein 6	-0.353528	0.352	0.194027
Q9D6K8	FUND2	FUN14 domain-containing protein 2	-0.139297	0.3525	0.194212
O88545	CSN6	COP9 signalosome complex subunit 6	-0.158746	0.3525	0.194397
Q49B93	SC5AC	Sodium-coupled monocarboxylate transporter 2	-0.274824	0.3525	0.194581
Q3UM45	PP1R7	Protein phosphatase 1 regulatory subunit 7	-0.11754	0.3526	0.194764
Q8VI36	PAXI	Paxillin	-0.27153	0.3536	0.194949
Q9D1K2	VATF	V-type proton ATPase subunit F	0.121037	0.3549	0.195134
Q07968	F13B	Coagulation factor XIII B chain	-0.179656	0.3552	0.19532
P0C0S6	H2AZ	Histone H2A.Z	-0.243612	0.3552	0.195505
Q99M87	DNJA3	DnaJ homolog subfamily A member 3, mitochondrial	0.249167	0.3556	0.19569
P24668	MPRD	Cation-dependent mannose-6-phosphate receptor	-0.106863	0.3558	0.195875
Q9JII5	DAZP1	DAZ-associated protein 1	-0.152867	0.3558	0.196059
Q80Y14	GLRX5	Glutaredoxin-related protein 5, mitochondrial	0.12765	0.356	0.196244
Q99JX7	NXF1	Nuclear RNA export factor 1	-0.144538	0.3566	0.196428
Q8VD75	HIP1	Huntingtin-interacting protein 1	0.175807	0.3569	0.196613
Q8BFY6	PEF1	Peflin	0.194822	0.3575	0.196797
Q9JHX6	ALLC	Probable allantoicase	0.125829	0.3576	0.196982
O70378	CX4NB	Neighbor of COX4	-0.14562	0.3578	0.197166
Q6PHZ5	RB15B	Putative RNA-binding protein 15B	-0.182079	0.3578	0.19735
Q924X6	LRP8	Low-density lipoprotein receptor-related protein 8	0.118244	0.3578	0.197533
O54734	OST48	Dolichyl-diphosphooligosaccharide--protein glycosyltransferase 48 kDa subunit	-0.0957632	0.3587	0.197717
Q8CI94	PYGB	Glycogen phosphorylase, brain form	-0.092496	0.3591	0.197901
Q61205	PA1B3	Platelet-activating factor acetylhydrolase IB subunit gamma	-0.181305	0.3594	0.198085
Q07832	PLK1	Serine/threonine-protein kinase PLK1	0.30477	0.3598	0.198269
Q80WJ7	LYRIC	Protein LYRIC	-0.103279	0.3598	0.198453
Q8BH57	WDR48	WD repeat-containing protein 48	-0.154124	0.3601	0.198636
Q8C8K3	SRS12	Serine/arginine-rich splicing factor 12	-0.15554	0.3602	0.198819
P55258	RAB8A	Ras-related protein Rab-8A	0.169332	0.3602	0.199002
P70266	F261	6-phosphofructo-2-kinase/fructose-2,6-biphosphatase 1	-0.155584	0.3604	0.199185
Q7TPD0	INT3	Integrator complex subunit 3	0.380932	0.3605	0.199367
Q99M54	CDCA3	Cell division cycle-associated protein 3	-0.154376	0.3606	0.199549
P47810	WEE1	Wee1-like protein kinase	-0.141558	0.3609	0.199731
P70441	NHRF1	Na(+)/H(+) exchange regulatory cofactor NHE-RF1	-0.157448	0.361	0.199912
Q99020	ROAA	Heterogeneous nuclear ribonucleoprotein A/B	0.179248	0.361	0.200094
Q6NS60	FBX41	F-box only protein 41	0.195982	0.3611	0.200274
P17427	AP2A2	AP-2 complex subunit alpha-2	-0.131284	0.3614	0.200455
Q8R5K4	NOL6	Nucleolar protein 6	0.149059	0.3615	0.200636
P50544	ACADV	Very long-chain specific acyl-CoA dehydrogenase, mitochondrial	0.0952371	0.3619	0.200816
Q60668	HNRPD	Heterogeneous nuclear ribonucleoprotein D0	-0.0922061	0.3624	0.200997
O35621	PMM1	Phosphomannomutase 1	-0.189297	0.3629	0.201178
P11087	CO1A1	Collagen alpha-1(I) chain	0.243899	0.3629	0.201359
Q69ZN7	MYOF	Myoferlin	-0.136309	0.3633	0.201539
Q8C7U1	N4BP3	NEDD4-binding protein 3	0.12606	0.3636	0.20172
Q9CY64	BIEA	Biliverdin reductase A	0.108497	0.3637	0.2019
Q3TIV5	ZC3HF	Zinc finger CCCH domain-containing protein 15	-0.156569	0.364	0.20208
Q8K1J6	TRNT1	CCA tRNA nucleotidyltransferase 1, mitochondrial	0.209734	0.3641	0.20226
Q99KR3	LACB2	Beta-lactamase-like protein 2	0.153599	0.3641	0.202439
O70400	PDLI1	PDZ and LIM domain protein 1	0.132373	0.3652	0.202619
P47856	GFPT1	Glucosamine--fructose-6-phosphate aminotransferase [isomerizing] 1	0.160612	0.3655	0.2028
Q6IRU2	TPM4	Tropomyosin alpha-4 chain	0.0966337	0.3656	0.202979
P17047	LAMP2	Lysosome-associated membrane glycoprotein 2	-0.413887	0.3657	0.203159
P08905	LYZ2	Lysozyme C-2	0.598824	0.3659	0.203338
Q3UFF7	LYPL1	Lysophospholipase-like protein 1	0.351325	0.3667	0.203518
Q9QUH0	GLRX1	Glutaredoxin-1	0.178022	0.3667	0.203698
Q9WV95	PHLA3	Pleckstrin homology-like domain family A member 3	0.314925	0.3668	0.203877
Q8VE18	SMG8	Protein SMG8	0.116492	0.3678	0.204057
P11679	K2C8	Keratin, type II cytoskeletal 8	-0.16545	0.3681	0.204237
Q61768	KINH	Kinesin-1 heavy chain	0.363003	0.3688	0.204417
Q8C196	CPSM	Carbamoyl-phosphate synthase [ammonia], mitochondrial	-0.201461	0.3688	0.204597
Q6KAU8	A16L2	Autophagy-related protein 16-2	0.1679	0.3695	0.204777
Q80W22	THNS2	Threonine synthase-like 2	0.168985	0.3697	0.204957
O88696	CLPP	Putative ATP-dependent Clp protease proteolytic subunit, mitochondrial	-0.287966	0.371	0.205138
Q8R0P4	CK067	UPF0366 protein C11orf67 homolog	0.107848	0.3712	0.205319
Q9R0P3	ESTD	S-formylglutathione hydrolase	-0.0969261	0.3714	0.2055
Q3U9G9	LBR	Lamin-B receptor	-0.128592	0.3716	0.205681
P97363	SPTC2	Serine palmitoyltransferase 2	-0.11204	0.3718	0.205861
Q8R0G7	SPNS1	Protein spinster homolog 1	0.234327	0.372	0.206041
B2RX12	MRP3	Canalicular multispecific organic anion transporter 2	0.27955	0.3721	0.206221
Q921F2	TADBP	TAR DNA-binding protein 43	-0.119936	0.3723	0.206401
Q9QZK7	DOK3	Docking protein 3	0.157465	0.3727	0.206581
Q9JI20	RED2	Double-stranded RNA-specific editase B2	-0.108614	0.3728	0.20676
Q5SRX1	TM1L2	TOM1-like protein 2	-0.134234	0.3732	0.20694
P28843	DPP4	Dipeptidyl peptidase 4	-0.11394	0.3733	0.207119
P08074	CBR2	Carbonyl reductase [NADPH] 2	-0.12608	0.3734	0.207298
P56382	ATP5E	ATP synthase subunit epsilon, mitochondrial	-0.118486	0.3742	0.207477
Q9JKS5	HABP4	Intracellular hyaluronan-binding protein 4	-0.112475	0.3742	0.207656
Q91YP6	ELMD3	ELMO domain-containing protein 3	-0.150755	0.3745	0.207835
O88851	RBBP9	Putative hydrolase RBBP9	0.169686	0.375	0.208015
Q61457	CCNE1	G1/S-specific cyclin-E1	0.159152	0.3752	0.208194
Q8CH72	TRI32	E3 ubiquitin-protein ligase TRIM32	-0.134784	0.3756	0.208373
Q8BVA4	LMOD1	Leiomodin-1	0.102968	0.3756	0.208551
P62301	RS13	40S ribosomal protein S13	-0.0926397	0.3766	0.208731
P53994	RAB2A	Ras-related protein Rab-2A	-0.0929357	0.3768	0.20891
Q6IFZ6	K2C1B	Keratin, type II cytoskeletal 1b	-0.107667	0.377	0.209089
Q3TMH2	SCRN3	Secernin-3	0.176569	0.3776	0.209268
Q91X05	PODO	Podocin	-0.156021	0.3783	0.209448
O70404	VAMP8	Vesicle-associated membrane protein 8	-0.128217	0.3785	0.209627
Q61702	ITIH1	Inter-alpha-trypsin inhibitor heavy chain H1	0.143369	0.379	0.209807
P47934	CACP	Carnitine O-acetyltransferase	0.0930317	0.379	0.209986
Q11011	PSA	Puromycin-sensitive aminopeptidase	-0.103756	0.3791	0.210165
P63037	DNJA1	DnaJ homolog subfamily A member 1	0.109347	0.3792	0.210344
Q3B7Z2	OSBP1	Oxysterol-binding protein 1	-0.121682	0.3795	0.210522
P18654	KS6A3	Ribosomal protein S6 kinase alpha-3	-0.104944	0.3796	0.210701
P62743	AP2S1	AP-2 complex subunit sigma	-0.109072	0.3798	0.210879
Q921T2	TOIP1	Torsin-1A-interacting protein 1	0.37942	0.3801	0.211057
Q9D1A2	CNDP2	Cytosolic non-specific dipeptidase	0.191931	0.3804	0.211235
Q9D906	ATG7	Ubiquitin-like modifier-activating enzyme ATG7	0.152712	0.3805	0.211413
Q9CXD6	CC90A	Coiled-coil domain-containing protein 90A, mitochondrial	0.241841	0.381	0.211591
P53986	MOT1	Monocarboxylate transporter 1	0.386457	0.3815	0.211769
P97494	GSH1	Glutamate--cysteine ligase catalytic subunit	0.167831	0.3823	0.211947
P32067	LA	Lupus La protein homolog	-0.119556	0.3827	0.212126
P97318	DAB1	Disabled homolog 1	0.161845	0.3827	0.212304
Q9R112	SQRD	Sulfide:quinone oxidoreductase, mitochondrial	-0.0988409	0.3837	0.212483
Q9D710	TMX2	Thioredoxin-related transmembrane protein 2	-0.124794	0.3841	0.212662
Q91W89	MA2C1	Alpha-mannosidase 2C1	0.127562	0.3842	0.212841
Q9JHS4	CLPX	ATP-dependent Clp protease ATP-binding subunit clpX-like, mitochondrial	-0.192632	0.3842	0.213019
Q78IK4	APOOL	Apolipoprotein O-like	-0.192196	0.3843	0.213197
P98156	VLDLR	Very low-density lipoprotein receptor	0.114907	0.3845	0.213375
P48771	CX7A2	Cytochrome c oxidase subunit 7A2, mitochondrial	0.118443	0.3852	0.213553
Q3V1M1	IGS10	Immunoglobulin superfamily member 10	-0.217226	0.3863	0.213732
P63044	VAMP2	Vesicle-associated membrane protein 2	-0.126693	0.3864	0.213911
Q8CJG0	AGO2	Protein argonaute-2	-0.240822	0.3869	0.21409
O35857	TIM44	Mitochondrial import inner membrane translocase subunit TIM44	0.141706	0.3873	0.214269
P63325	RS10	40S ribosomal protein S10	-0.0994169	0.3873	0.214447
P67871	CSK2B	Casein kinase II subunit beta	-0.235407	0.3875	0.214626
Q8R4U7	LUZP1	Leucine zipper protein 1	0.154563	0.3878	0.214804
Q8BU30	SYIC	Isoleucyl-tRNA synthetase, cytoplasmic	0.150301	0.3878	0.214982
Q9CQB5	CISD2	CDGSH iron-sulfur domain-containing protein 2	0.367212	0.3882	0.21516
Q5NBX1	COBL	Protein cordon-bleu	-0.120573	0.3882	0.215338
P56380	AP4A	Bis(5'-nucleosyl)-tetraphosphatase [asymmetrical]	0.268778	0.3883	0.215515
O88569	ROA2	Heterogeneous nuclear ribonucleoproteins A2/B1	-0.0881087	0.3887	0.215693
Q6ZQ08	CNOT1	CCR4-NOT transcription complex subunit 1	-0.124458	0.389	0.21587
Q78T54	VMA21	Vacuolar ATPase assembly integral membrane protein VMA21	0.177436	0.389	0.216047
P97390	VPS45	Vacuolar protein sorting-associated protein 45	0.223933	0.389	0.216224
Q9WTX6	CUL1	Cullin-1	-0.161217	0.3891	0.2164
Q80YT5	SPT20	Spermatogenesis-associated protein 20	0.295166	0.3893	0.216576
Q6NVF9	CPSF6	Cleavage and polyadenylation specificity factor subunit 6	0.189599	0.3894	0.216752
Q9R233	TPSN	Tapasin	-0.10502	0.3894	0.216928
P16879	FES	Tyrosine-protein kinase Fes/Fps	-0.206845	0.3896	0.217104
Q791V5	MTCH2	Mitochondrial carrier homolog 2	0.116046	0.3897	0.217279
P36916	GNL1	Guanine nucleotide-binding protein-like 1	0.122344	0.39	0.217454
P15089	CBPA3	Mast cell carboxypeptidase A	-0.134428	0.3905	0.217629
Q62165	DAG1	Dystroglycan	0.144311	0.3909	0.217805
Q9CQ19	MYL9	Myosin regulatory light polypeptide 9	0.228858	0.3909	0.21798
Q9DBM2	ECHP	Peroxisomal bifunctional enzyme	-0.095129	0.391	0.218154
P59242	CING	Cingulin	-0.129888	0.3919	0.21833
Q99KJ8	DCTN2	Dynactin subunit 2	0.0826543	0.3921	0.218505
Q11136	PEPD	Xaa-Pro dipeptidase	-0.100901	0.3921	0.21868
Q9DC50	OCTC	Peroxisomal carnitine O-octanoyltransferase	-0.220802	0.3922	0.218854
Q61645	HAIR	Protein hairless	-0.156363	0.3924	0.219029
Q3V0T4	ITAD	Integrin alpha-D	0.277499	0.3924	0.219203
Q80X66	BTBDA	BTB/POZ domain-containing protein 10	0.195297	0.3931	0.219377
Q8CDN6	TXNL1	Thioredoxin-like protein 1	0.117865	0.3933	0.219552
P37040	NCPR	NADPH--cytochrome P450 reductase	-0.0891901	0.3936	0.219726
Q8R1Q8	DC1L1	Cytoplasmic dynein 1 light intermediate chain 1	-0.103412	0.3938	0.2199
Q9DB77	QCR2	Cytochrome b-c1 complex subunit 2, mitochondrial	0.0925965	0.3944	0.220074
Q9JHR9	NRIP2	Nuclear receptor-interacting protein 2	-0.14242	0.3946	0.220248
Q9WTX2	PRKRA	Interferon-inducible double stranded RNA-dependent protein kinase activator A	0.109141	0.3948	0.220422
Q9ESJ4	SPN90	NCK-interacting protein with SH3 domain	-0.112905	0.3951	0.220596
Q99KH8	STK24	Serine/threonine-protein kinase 24	-0.146013	0.3951	0.22077
Q99JR1	SFXN1	Sideroflexin-1	-0.0891138	0.3953	0.220943
Q99M85	SCRT1	Transcriptional repressor scratch 1	-0.151496	0.3954	0.221117
Q5SVR0	TBC9B	TBC1 domain family member 9B	0.127014	0.3955	0.22129
Q9DB27	MCTS1	Malignant T cell-amplified sequence 1	-0.118573	0.3955	0.221462
P34928	APOC1	Apolipoprotein C-I	0.132026	0.3969	0.221636
P47963	RL13	60S ribosomal protein L13	-0.0885297	0.3977	0.22181
O35841	API5	Apoptosis inhibitor 5	-0.237161	0.398	0.221984
Q9Z1T1	AP3B1	AP-3 complex subunit beta-1	0.264313	0.3984	0.222158
P70298	CUX2	Homeobox protein cut-like 2	-0.296595	0.3989	0.222333
Q571E4	GALNS	N-acetylgalactosamine-6-sulfatase	0.120355	0.3995	0.222507
Q8BZ32	ASXL2	Putative Polycomb group protein ASXL2	0.117597	0.3995	0.222681
Q9Z0U1	ZO2	Tight junction protein ZO-2	0.188144	0.3996	0.222855
Q8K363	DDX18	ATP-dependent RNA helicase DDX18	0.16924	0.3998	0.223029
O08914	FAAH1	Fatty-acid amide hydrolase 1	0.215191	0.4003	0.223203
Q91XD7	CREL1	Cysteine-rich with EGF-like domain protein 1	-0.207255	0.4006	0.223377
Q9Z0Y1	DCTN3	Dynactin subunit 3	-0.150813	0.4006	0.223551
P51885	LUM	Lumican	-0.0940044	0.4006	0.223724
P48428	TBCA	Tubulin-specific chaperone A	-0.101739	0.401	0.223897
Q80VI1	TRI56	E3 ubiquitin-protein ligase TRIM56	0.659	0.4012	0.22407
Q8JZQ9	EIF3B	Eukaryotic translation initiation factor 3 subunit B	0.105731	0.4012	0.224243
Q99NB9	SF3B1	Splicing factor 3B subunit 1	0.163988	0.4013	0.224416
P61021	RAB5B	Ras-related protein Rab-5B	-0.133421	0.4014	0.224588
Q9WU78	PDC6I	Programmed cell death 6-interacting protein	-0.0855479	0.4016	0.22476
P26645	MARCS	Myristoylated alanine-rich C-kinase substrate	-0.125143	0.402	0.224933
O09131	GSTO1	Glutathione S-transferase omega-1	0.10013	0.4021	0.225105
O88487	DC1I2	Cytoplasmic dynein 1 intermediate chain 2	0.0897113	0.4025	0.225277
Q8R0S2	IQEC1	IQ motif and SEC7 domain-containing protein 1	0.0936323	0.4027	0.225449
Q6GV12	KDSR	3-ketodihydrosphingosine reductase	-0.11866	0.4027	0.22562
Q6P3A8	ODBB	2-oxoisovalerate dehydrogenase subunit beta, mitochondrial	0.262891	0.4028	0.225791
P48036	ANXA5	Annexin A5	0.0856565	0.4028	0.225963
Q9CQZ5	NDUA6	NADH dehydrogenase [ubiquinone] 1 alpha subcomplex subunit 6	0.111103	0.4032	0.226134
P70261	PALD	Paladin	-0.169423	0.4033	0.226304
Q60676	PPP5	Serine/threonine-protein phosphatase 5	0.132852	0.4035	0.226475
Q9Z108	STAU1	Double-stranded RNA-binding protein Staufen homolog 1	-0.198548	0.4037	0.226646
Q3URQ0	TEX10	Testis-expressed sequence 10 protein	-0.168648	0.4037	0.226816
Q9CQE8	CN166	UPF0568 protein C14orf166 homolog	0.0989938	0.4039	0.226986
Q6Y685	TACC1	Transforming acidic coiled-coil-containing protein 1	0.137438	0.4042	0.227156
P19221	THRB	Prothrombin	0.0880335	0.4044	0.227326
Q9D832	DNJB4	DnaJ homolog subfamily B member 4	-0.115188	0.4046	0.227496
O35206	COFA1	Collagen alpha-1(XV) chain	0.0937508	0.4047	0.227665
P30412	PPIC	Peptidyl-prolyl cis-trans isomerase C	0.11182	0.4047	0.227835
Q9DAC9	PO5F2	POU domain, class 5, transcription factor 2	0.220331	0.4051	0.228004
Q9JKK1	STX6	Syntaxin-6	-0.232469	0.4055	0.228173
Q9Z0N1	IF2G	Eukaryotic translation initiation factor 2 subunit 3, X-linked	-0.115442	0.4059	0.228343
P81117	NUCB2	Nucleobindin-2	-0.109317	0.4063	0.228512
Q3UIA2	RHG17	Rho GTPase-activating protein 17	-0.203455	0.4063	0.228681
P11103	PARP1	Poly [ADP-ribose] polymerase 1	-0.106219	0.4066	0.228851
Q8BGQ1	VIPAR	VPS33B-interacting protein	-0.109915	0.4072	0.22902
P42227	STAT3	Signal transducer and activator of transcription 3	-0.0900081	0.4077	0.229189
P17665	COX7C	Cytochrome c oxidase subunit 7C, mitochondrial	0.14569	0.408	0.229359
P11859	ANGT	Angiotensinogen	0.097921	0.4083	0.229528
P14869	RLA0	60S acidic ribosomal protein P0	-0.0947001	0.4096	0.229699
Q9JI75	NQO2	Ribosyldihydronicotinamide dehydrogenase [quinone]	0.110797	0.4098	0.229869
Q01730	RSU1	Ras suppressor protein 1	-0.0919067	0.4098	0.230039
Q61206	PA1B2	Platelet-activating factor acetylhydrolase IB subunit beta	0.100606	0.41	0.230209
Q3ULJ0	GPD1L	Glycerol-3-phosphate dehydrogenase 1-like protein	-0.1116	0.4102	0.230378
Q9R0E2	PLOD1	Procollagen-lysine,2-oxoglutarate 5-dioxygenase 1	0.173413	0.4111	0.230548
Q6PGC1	DHX29	ATP-dependent RNA helicase Dhx29	0.106033	0.4112	0.230718
P51655	GPC4	Glypican-4	-0.224445	0.4113	0.230888
Q6NSR8	PEPL1	Probable aminopeptidase NPEPL1	-0.0930549	0.4113	0.231058
P06683	CO9	Complement component C9	-0.0925249	0.4116	0.231227
O88544	CSN4	COP9 signalosome complex subunit 4	0.20682	0.4118	0.231396
P68368	TBA4A	Tubulin alpha-4A chain	0.141066	0.4119	0.231565
Q3UYI5	RGL3	Ral guanine nucleotide dissociation stimulator-like 3	0.192027	0.4132	0.231735
P21278	GNA11	Guanine nucleotide-binding protein subunit alpha-11	-0.0871053	0.4135	0.231905
P67984	RL22	60S ribosomal protein L22	-0.0939739	0.4136	0.232075
Q9WTX5	SKP1	S-phase kinase-associated protein 1	0.130925	0.4138	0.232244
Q9DC69	NDUA9	NADH dehydrogenase [ubiquinone] 1 alpha subcomplex subunit 9, mitochondrial	0.0889558	0.414	0.232414
Q99JY3	GIMA4	GTPase IMAP family member 4	0.188783	0.4142	0.232583
Q9D0T1	NH2L1	NHP2-like protein 1	0.0980927	0.4147	0.232752
P62192	PRS4	26S protease regulatory subunit 4	-0.0947403	0.4147	0.232921
P99024	TBB5	Tubulin beta-5 chain	-0.0988846	0.4147	0.23309
P06151	LDHA	L-lactate dehydrogenase A chain	0.0801132	0.4149	0.233259
Q8BKN6	HS3SA	Heparan sulfate glucosamine 3-O-sulfotransferase 3A1	-0.120777	0.415	0.233427
Q7TSH2	KPBB	Phosphorylase b kinase regulatory subunit beta	0.254331	0.4153	0.233596
Q00175	PRGR	Progesterone receptor	-0.188408	0.4154	0.233764
P16882	GHR	Growth hormone receptor	-0.102999	0.4163	0.233932
Q60597	ODO1	2-oxoglutarate dehydrogenase, mitochondrial	0.0884196	0.4173	0.234102
P57016	LAD1	Ladinin-1	0.132119	0.4178	0.234271
Q9D8S4	ORN	Oligoribonuclease, mitochondrial	0.181133	0.4183	0.234441
Q8K449	ABCA9	ATP-binding cassette sub-family A member 9	-0.145953	0.4187	0.23461
Q91VJ2	PRDBP	Protein kinase C delta-binding protein	-0.0983193	0.419	0.23478
P63154	CRNL1	Crooked neck-like protein 1	-0.138942	0.4191	0.23495
Q91V16	LYRM5	LYR motif-containing protein 5	0.121185	0.4193	0.235119
Q9CRB9	CHCH3	Coiled-coil-helix-coiled-coil-helix domain-containing protein 3, mitochondrial	-0.0830563	0.4196	0.235288
P45591	COF2	Cofilin-2	0.125432	0.4196	0.235457
O35643	AP1B1	AP-1 complex subunit beta-1	-0.10598	0.4198	0.235626
P10833	RRAS	Ras-related protein R-Ras	-0.101631	0.42	0.235795
P02463	CO4A1	Collagen alpha-1(IV) chain	0.135974	0.4202	0.235963
P48774	GSTM5	Glutathione S-transferase Mu 5	-0.109531	0.4211	0.236132
Q64462	CP4B1	Cytochrome P450 4B1	0.119144	0.4212	0.236301
Q9JLQ0	CD2AP	CD2-associated protein	-0.190876	0.4218	0.23647
Q9CPQ1	COX6C	Cytochrome c oxidase subunit 6C	0.088686	0.4222	0.236639
Q3UVV9	VWA3A	von Willebrand factor A domain-containing protein 3A	-0.108685	0.4224	0.236808
Q149S1	TEKT4	Tektin-4	-0.112371	0.4226	0.236977
P38647	GRP75	Stress-70 protein, mitochondrial	0.0842008	0.4229	0.237146
P09602	HMGN2	Non-histone chromosomal protein HMG-17	-0.107015	0.4231	0.237315
Q66JS6	EIF3J	Eukaryotic translation initiation factor 3 subunit J	0.0867949	0.424	0.237484
P63038	CH60	60 kDa heat shock protein, mitochondrial	0.0839986	0.424	0.237653
P06795	MDR1	Multidrug resistance protein 1	-0.196592	0.4241	0.237822
Q9D024	CC47	Coiled-coil domain-containing protein 47	0.104527	0.4241	0.23799
Q7TNG5	EMAL2	Echinoderm microtubule-associated protein-like 2	-0.0972628	0.4243	0.238158
Q3UJV1	CCD61	Coiled-coil domain-containing protein 61	0.233411	0.4245	0.238327
O89020	AFAM	Afamin	0.0927735	0.4246	0.238495
Q8K2I1	FNTB	Protein farnesyltransferase subunit beta	0.110279	0.4253	0.238663
Q6PHU5	SORT	Sortilin	-0.168366	0.4259	0.238831
Q9DB15	RM12	39S ribosomal protein L12, mitochondrial	0.0926726	0.4263	0.239
P82198	BGH3	Transforming growth factor-beta-induced protein ig-h3	0.166971	0.4265	0.239168
Q9DCV3	DGAT2	Diacylglycerol O-acyltransferase 2	0.155947	0.4271	0.239337
O55023	IMPA1	Inositol monophosphatase 1	-0.0878543	0.4274	0.239506
P49442	INPP	Inositol polyphosphate 1-phosphatase	-0.179012	0.4274	0.239674
O89017	LGMN	Legumain	-0.11307	0.4285	0.239843
P0C5I1	GPR25	Probable G-protein coupled receptor 25	-0.153341	0.4287	0.240012
Q9R0H0	ACOX1	Peroxisomal acyl-coenzyme A oxidase 1	-0.0835955	0.4289	0.240181
P48168	GLRB	Glycine receptor subunit beta	-0.113081	0.4297	0.24035
P47754	CAZA2	F-actin-capping protein subunit alpha-2	-0.104749	0.4297	0.240519
P97287	MCL1	Induced myeloid leukemia cell differentiation protein Mcl-1 homolog	0.126344	0.4298	0.240688
Q3THG9	AASD1	Alanyl-tRNA editing protein Aarsd1	0.158359	0.4298	0.240856
P35550	FBRL	rRNA 2'-O-methyltransferase fibrillarin	-0.0862937	0.4299	0.241024
Q8C119	CD031	Fibronectin type-III domain-containing protein C4orf31 homolog	-0.165616	0.43	0.241192
P99027	RLA2	60S acidic ribosomal protein P2	-0.084672	0.43	0.24136
Q61033	LAP2A	Lamina-associated polypeptide 2, isoforms alpha/zeta	-0.145459	0.4309	0.241528
Q8BIW1	PRUNE	Protein prune homolog	0.100149	0.4313	0.241696
Q9CWK8	SNX2	Sorting nexin-2	-0.0864773	0.4314	0.241864
Q8K268	ABCF3	ATP-binding cassette sub-family F member 3	0.109157	0.4318	0.242033
Q8BJU9	RF1ML	Peptide chain release factor 1-like, mitochondrial	-0.0994979	0.4318	0.2422
Q99LC3	NDUAA	NADH dehydrogenase [ubiquinone] 1 alpha subcomplex subunit 10, mitochondrial	0.0900542	0.4318	0.242368
Q9DC61	MPPA	Mitochondrial-processing peptidase subunit alpha	-0.24678	0.4325	0.242536
Q6A028	SWP70	Switch-associated protein 70	0.130617	0.4325	0.242703
O35627	NR1I3	Nuclear receptor subfamily 1 group I member 3	0.109496	0.4327	0.242871
Q9CYH2	CJ058	UPF0765 protein C10orf58 homolog	0.0795097	0.4329	0.243038
P70349	HINT1	Histidine triad nucleotide-binding protein 1	-0.0867556	0.4331	0.243205
O88456	CPNS1	Calpain small subunit 1	-0.0605571	0.4332	0.243372
Q8R404	QIL1	Protein QIL1	0.0932271	0.4339	0.243539
P23591	FCL	GDP-L-fucose synthase	-0.192053	0.4339	0.243706
Q64739	COBA2	Collagen alpha-2(XI) chain	-0.132169	0.4345	0.243873
Q5SYD0	MYO1D	Myosin-Id	-0.0979676	0.4347	0.244041
Q2UY11	COSA1	Collagen alpha-1(XXVIII) chain	-0.102575	0.4348	0.244207
Q01776	GNRHR	Gonadotropin-releasing hormone receptor	0.0957227	0.4348	0.244374
Q9CXS4	CENPV	Centromere protein V	0.278074	0.4351	0.244541
Q99KC8	VMA5A	von Willebrand factor A domain-containing protein 5A	-0.0847854	0.4355	0.244707
Q91WS2	NALP6	NACHT, LRR and PYD domains-containing protein 6	0.106213	0.436	0.244874
O55242	SGMR1	Sigma non-opioid intracellular receptor 1	0.107619	0.4364	0.245041
P50136	ODBA	2-oxoisovalerate dehydrogenase subunit alpha, mitochondrial	0.0370737	0.4368	0.245208
P63323	RS12	40S ribosomal protein S12	-0.0824406	0.4373	0.245375
Q3UPL0	SC31A	Protein transport protein Sec31A	-0.0921593	0.4374	0.245542
P60229	EIF3E	Eukaryotic translation initiation factor 3 subunit E	0.213631	0.4375	0.245708
P23116	EIF3A	Eukaryotic translation initiation factor 3 subunit A	-0.0917778	0.4375	0.245875
Q9DCN2	NB5R3	NADH-cytochrome b5 reductase 3	-0.0835546	0.4378	0.246041
Q9D0G0	RT30	28S ribosomal protein S30, mitochondrial	-0.124517	0.4382	0.246207
P97468	CML1	Chemokine-like receptor 1	0.106977	0.4382	0.246373
Q3UHQ6	DOP2	Protein dopey-2	-0.22061	0.4384	0.246539
Q63829	COMD3	COMM domain-containing protein 3	0.148781	0.4386	0.246705
Q9D3W5	CA092	Leucine-rich repeat-containing protein C10orf92 homolog	0.142125	0.4388	0.246871
P70697	DCUP	Uroporphyrinogen decarboxylase	0.1008	0.4389	0.247036
Q9CS00	CS029	Uncharacterized protein C19orf29 homolog	-0.104798	0.4392	0.247202
Q9D2N9	VP33A	Vacuolar protein sorting-associated protein 33A	-0.105625	0.4393	0.247367
Q569Z5	DDX46	Probable ATP-dependent RNA helicase DDX46	-0.124939	0.4402	0.247533
P35441	TSP1	Thrombospondin-1	0.12221	0.4402	0.247699
P01898	HA10	H-2 class I histocompatibility antigen, Q10 alpha chain	0.0918649	0.4402	0.247864
P09405	NUCL	Nucleolin	0.106879	0.4404	0.248029
P63101	1433Z	14-3-3 protein zeta/delta	-0.0815447	0.4409	0.248194
Q9DCC4	P5CR3	Pyrroline-5-carboxylate reductase 3	0.335597	0.4412	0.24836
P35279	RAB6A	Ras-related protein Rab-6A	-0.0853328	0.4415	0.248525
Q9Z0P4	PALM	Paralemmin	-0.0882859	0.4415	0.24869
Q9Z2A7	DGAT1	Diacylglycerol O-acyltransferase 1	0.0929105	0.4417	0.248854
Q9CQE1	NPS3A	Protein NipSnap homolog 3A	-0.0919928	0.4418	0.249019
P58021	TM9S2	Transmembrane 9 superfamily member 2	-0.212793	0.4419	0.249184
Q61315	APC	Adenomatous polyposis coli protein	0.116553	0.442	0.249348
P61161	ARP2	Actin-related protein 2	-0.0704343	0.442	0.249512
Q62348	TSN	Translin	-0.08883	0.4424	0.249676
Q9D8S9	BOLA1	BolA-like protein 1	-0.0948725	0.4429	0.24984
Q9D1R2	KTI12	Protein KTI12 homolog	0.158569	0.4431	0.250004
P12367	KAP2	cAMP-dependent protein kinase type II-alpha regulatory subunit	-0.0973855	0.4432	0.250168
Q921M4	GOGA2	Golgin subfamily A member 2	0.108625	0.4434	0.250332
Q6ZQ29	TAOK2	Serine/threonine-protein kinase TAO2	-0.111691	0.4434	0.250495
Q922U2	K2C5	Keratin, type II cytoskeletal 5	-0.19567	0.4435	0.250658
Q8BL97	SRSF7	Serine/arginine-rich splicing factor 7	-0.100274	0.4437	0.250822
Q3U214	MAST3	Microtubule-associated serine/threonine-protein kinase 3	0.116491	0.4437	0.250984
Q6ZQM8	UD17C	UDP-glucuronosyltransferase 1-7C	0.221412	0.4438	0.251147
Q91X72	HEMO	Hemopexin	-0.0835386	0.444	0.25131
Q9DCV7	K2C7	Keratin, type II cytoskeletal 7	-0.102113	0.4441	0.251472
P62270	RS18	40S ribosomal protein S18	-0.0821825	0.4441	0.251634
P47962	RL5	60S ribosomal protein L5	-0.0881151	0.4442	0.251796
Q9WV80	SNX1	Sorting nexin-1	-0.115229	0.4443	0.251958
Q68FL6	SYMC	Methionyl-tRNA synthetase, cytoplasmic	0.110464	0.4444	0.25212
Q148V7	K1468	LisH domain and HEAT repeat-containing protein KIAA1468	-0.0956186	0.4444	0.252281
Q8CC86	PNCB	Nicotinate phosphoribosyltransferase	-0.111853	0.4444	0.252442
Q14BI2	GRM2	Metabotropic glutamate receptor 2	0.107493	0.4446	0.252603
P58871	TB182	182 kDa tankyrase-1-binding protein	-0.0813441	0.4447	0.252764
Q9R1P0	PSA4	Proteasome subunit alpha type-4	-0.0860942	0.4454	0.252925
Q9D0D3	PAPD1	Poly(A) RNA polymerase, mitochondrial	0.13975	0.4458	0.253086
Q3UHN9	NDST1	Bifunctional heparan sulfate N-deacetylase/N-sulfotransferase 1	-0.104567	0.4464	0.253247
Q8C8T8	TSR2	Pre-rRNA-processing protein TSR2 homolog	-0.0979123	0.4465	0.253408
A6H639	TCTE1	T-complex-associated testis-expressed protein 1	-0.107378	0.4466	0.253569
P97412	LYST	Lysosomal-trafficking regulator	0.182754	0.4466	0.25373
Q6P5D3	DHX57	Putative ATP-dependent RNA helicase DHX57	-0.073023	0.4467	0.253891
P52800	EFNB2	Ephrin-B2	-0.187654	0.4469	0.254051
P61804	DAD1	Dolichyl-diphosphooligosaccharide--protein glycosyltransferase subunit DAD1	0.110779	0.447	0.254211
P70403	CASP	Protein CASP	0.0952052	0.4472	0.254372
Q8CGF7	TCRG1	Transcription elongation regulator 1	0.170876	0.4479	0.254532
P70662	LDB1	LIM domain-binding protein 1	-0.125214	0.4479	0.254692
Q60994	ADIPO	Adiponectin	0.0896536	0.4481	0.254852
Q80U93	NU214	Nuclear pore complex protein Nup214	0.225837	0.4482	0.255012
P97300	NPTN	Neuroplastin	-0.0839055	0.4484	0.255172
Q9CPQ8	ATP5L	ATP synthase subunit g, mitochondrial	0.111615	0.4486	0.255332
P62830	RL23	60S ribosomal protein L23	-0.0937508	0.4488	0.255491
Q9JJ28	FLII	Protein flightless-1 homolog	0.154942	0.4496	0.255651
Q920B0	FRM4B	FERM domain-containing protein 4B	0.0952512	0.4499	0.255811
Q9CQC7	NDUB4	NADH dehydrogenase [ubiquinone] 1 beta subcomplex subunit 4	0.123519	0.45	0.255971
Q0ZCJ7	MASTR	MEF2-activating motif and SAP domain-containing transcriptional regulator	-0.107237	0.4503	0.256131
P11930	NUD19	Nucleoside diphosphate-linked moiety X motif 19, mitochondrial	0.126924	0.4504	0.256291
Q8BUK6	HOOK3	Protein Hook homolog 3	-0.0895275	0.4511	0.256451
Q60870	REEP5	Receptor expression-enhancing protein 5	-0.114565	0.4513	0.256611
Q8BVC4	CCD68	Coiled-coil domain-containing protein 68	-0.0971184	0.4514	0.25677
Q9QYS9	QKI	Protein quaking	0.100622	0.4518	0.25693
Q9CQJ6	DENR	Density-regulated protein	-0.0997177	0.4518	0.257089
Q7TMY8	HUWE1	E3 ubiquitin-protein ligase HUWE1	-0.0957427	0.4519	0.257249
Q99NH2	PARD3	Partitioning defective 3 homolog	-0.158867	0.4522	0.257408
P20918	PLMN	Plasminogen	0.0763814	0.4522	0.257567
P20065	TYB4	Thymosin beta-4	-0.0976663	0.4523	0.257726
Q60759	GCDH	Glutaryl-CoA dehydrogenase, mitochondrial	-0.118413	0.4524	0.257884
Q3UQN2	FCHO2	FCH domain only protein 2	0.0917443	0.4526	0.258043
P17892	LIPR2	Pancreatic lipase-related protein 2	-0.0873574	0.4529	0.258202
A9Q751	PCDP1	Primary ciliary dyskinesia protein 1	-0.0934386	0.4531	0.25836
Q99JY9	ARP3	Actin-related protein 3	0.0827385	0.4531	0.258518
Q8BH69	SPS1	Selenide, water dikinase 1	-0.137822	0.4534	0.258676
Q8BGQ7	SYAC	Alanyl-tRNA synthetase, cytoplasmic	-0.0779767	0.4534	0.258834
Q9Z1R3	APOM	Apolipoprotein M	-0.0879599	0.4536	0.258992
Q8CHK3	MBOA7	Lysophospholipid acyltransferase 7	-0.131538	0.4536	0.25915
O88630	GOSR1	Golgi SNAP receptor complex member 1	-0.075107	0.4536	0.259307
Q8K1Z0	COQ9	Ubiquinone biosynthesis protein COQ9, mitochondrial	0.0827397	0.4542	0.259465
O35685	NUDC	Nuclear migration protein nudC	-0.161767	0.4545	0.259622
Q99LX0	PARK7	Protein DJ-1	-0.0748869	0.4548	0.25978
P22892	AP1G1	AP-1 complex subunit gamma-1	0.324308	0.4548	0.259937
Q9ET77	JPH3	Junctophilin-3	-0.114817	0.4549	0.260094
O70194	EIF3D	Eukaryotic translation initiation factor 3 subunit D	-0.0855774	0.456	0.260252
P62305	RUXE	Small nuclear ribonucleoprotein E	-0.0943989	0.456	0.260409
O89079	COPE	Coatomer subunit epsilon	-0.0814823	0.4562	0.260567
Q99LM2	CK5P3	CDK5 regulatory subunit-associated protein 3	0.204927	0.4562	0.260724
A2APT9	KLD7A	Kelch domain-containing protein 7A	0.0982778	0.4562	0.260881
Q8C5W3	TBCEL	Tubulin-specific chaperone cofactor E-like protein	0.0969123	0.4563	0.261037
Q91Z38	TTC1	Tetratricopeptide repeat protein 1	-0.137453	0.4563	0.261194
Q9JJN5	CBPN	Carboxypeptidase N catalytic chain	-0.0896718	0.4564	0.26135
Q9CPX6	ATG3	Ubiquitin-like-conjugating enzyme ATG3	-0.0904605	0.4566	0.261506
Q9JMH9	MY18A	Myosin-XVIIIa	-0.0789506	0.4567	0.261662
Q8BGD9	IF4B	Eukaryotic translation initiation factor 4B	0.093919	0.4568	0.261818
Q8C0Q3	TTC34	Tetratricopeptide repeat protein 34	-0.142471	0.457	0.261974
O55060	TPMT	Thiopurine S-methyltransferase	-0.118847	0.457	0.26213
Q8VEE0	RPE	Ribulose-phosphate 3-epimerase	0.158864	0.4572	0.262285
P09528	FRIH	Ferritin heavy chain	-0.122064	0.4575	0.26244
Q9QYJ3	DNJB1	DnaJ homolog subfamily B member 1	-0.0922093	0.4577	0.262596
Q9QXC1	FETUB	Fetuin-B	0.0971472	0.4578	0.262751
Q91VH2	SNX9	Sorting nexin-9	0.105295	0.4579	0.262906
Q9WUB7	CLCKA	Chloride channel protein ClC-Ka	0.141694	0.458	0.263061
Q5I012	S38AA	Putative sodium-coupled neutral amino acid transporter 10	-0.0892205	0.4583	0.263216
Q8R322	GLE1	Nucleoporin GLE1	-0.0831792	0.4586	0.26337
A1A535	MELT	Ventricular zone-expressed PH domain-containing protein 1	-0.0897886	0.4587	0.263525
Q99LB6	MAT2B	Methionine adenosyltransferase 2 subunit beta	0.135598	0.4589	0.26368
Q61006	MUSK	Muscle, skeletal receptor tyrosine-protein kinase	-0.126539	0.459	0.263834
Q9D0M3	CY1	Cytochrome c1, heme protein, mitochondrial	0.0820927	0.459	0.263988
P06909	CFAH	Complement factor H	-0.105199	0.4591	0.264142
Q5U405	TMPSD	Transmembrane protease serine 13	-0.102949	0.4592	0.264296
P11276	FINC	Fibronectin	0.0788696	0.4597	0.26445
O70209	PDLI3	PDZ and LIM domain protein 3	-0.0730063	0.4598	0.264604
Q3UN16	GP162	Probable G-protein coupled receptor 162	0.12714	0.46	0.264758
Q3UMR5	C109A	Coiled-coil domain-containing protein 109A	0.105429	0.4606	0.264911
Q80XC6	CN102	UPF0614 protein C14orf102 homolog	0.130275	0.4608	0.265065
Q8C878	UBA3	NEDD8-activating enzyme E1 catalytic subunit	-0.0156344	0.4612	0.265219
Q60854	SPB6	Serpin B6	-0.085743	0.4612	0.265373
Q9CZ30	OLA1	Obg-like ATPase 1	0.0906468	0.4615	0.265527
Q8K482	EMIL2	EMILIN-2	-0.0948283	0.4616	0.26568
Q9CQC9	SAR1B	GTP-binding protein SAR1b	-0.0870005	0.4617	0.265834
Q9CXW3	CYBP	Calcyclin-binding protein	-0.0791089	0.4617	0.265987
Q9WVQ5	MTNB	Probable methylthioribulose-1-phosphate dehydratase	-0.0982126	0.4621	0.26614
Q9ET22	DPP2	Dipeptidyl peptidase 2	0.107829	0.4622	0.266293
Q8C0E2	VP26B	Vacuolar protein sorting-associated protein 26B	0.0866495	0.4623	0.266446
Q922D8	C1TC	C-1-tetrahydrofolate synthase, cytoplasmic	-0.0817924	0.4623	0.266599
O70252	HMOX2	Heme oxygenase 2	0.0809535	0.4623	0.266751
Q62417	SRBS1	Sorbin and SH3 domain-containing protein 1	0.0744546	0.4626	0.266903
P55264	ADK	Adenosine kinase	0.0795245	0.4631	0.267056
Q8K2F0	BRD3	Bromodomain-containing protein 3	-0.0874972	0.4633	0.267208
Q6PGF7	EXOC8	Exocyst complex component 8	0.0815325	0.4634	0.267361
P97450	ATP5J	ATP synthase-coupling factor 6, mitochondrial	0.0859555	0.4635	0.267513
Q07797	LG3BP	Galectin-3-binding protein	-0.0630245	0.4637	0.267665
P42230	STA5A	Signal transducer and activator of transcription 5A	0.104691	0.4638	0.267817
Q6R5N8	TLR13	Toll-like receptor 13	-0.101717	0.4643	0.267969
Q8BPU7	ELMO1	Engulfment and cell motility protein 1	0.0865115	0.4646	0.268121
Q61490	CD166	CD166 antigen	0.121113	0.4647	0.268273
O08638	MYH11	Myosin-11	-0.104479	0.4649	0.268425
Q0PHV7	DACT3	Dapper homolog 3	0.0929709	0.4649	0.268576
Q8VCM8	NCLN	Nicalin	0.0916598	0.465	0.268728
Q8BWZ3	NAA25	N-alpha-acetyltransferase 25, NatB auxiliary subunit	-0.0710946	0.4651	0.268879
Q07813	BAX	Apoptosis regulator BAX	0.0910067	0.4653	0.26903
Q3UKJ7	SMU1	WD40 repeat-containing protein SMU1	0.0861786	0.4661	0.269182
Q99KK2	NEUA	N-acylneuraminate cytidylyltransferase	0.133139	0.4662	0.269333
P16381	DDX3L	Putative ATP-dependent RNA helicase Pl10	0.0956325	0.4664	0.269485
Q3TW96	UAP1L	UDP-N-acetylhexosamine pyrophosphorylase-like protein 1	0.0868448	0.4665	0.269636
Q501J6	DDX17	Probable ATP-dependent RNA helicase DDX17	-0.0829321	0.4669	0.269787
O35071	KIF1C	Kinesin-like protein KIF1C	-0.0922075	0.4669	0.269938
Q99PV8	BC11B	B-cell lymphoma/leukemia 11B	0.0836626	0.4669	0.270089
P61255	RL26	60S ribosomal protein L26	-0.0826012	0.4683	0.270241
Q9R1Q7	PLP2	Proteolipid protein 2	0.13312	0.4686	0.270392
Q8K015	CENPO	Centromere protein O	-0.112998	0.4695	0.270545
Q91YI4	ARRB2	Beta-arrestin-2	0.0945068	0.4696	0.270696
O88712	CTBP1	C-terminal-binding protein 1	0.0843568	0.4696	0.270848
Q59J78	MIMIT	Mimitin, mitochondrial	-0.0764925	0.4696	0.271
Q6P542	ABCF1	ATP-binding cassette sub-family F member 1	-0.10275	0.4696	0.271151
Q921L3	TMCO1	Transmembrane and coiled-coil domain-containing protein 1	-0.0829768	0.4697	0.271302
O70579	PM34	Peroxisomal membrane protein PMP34	0.0777564	0.4698	0.271453
P35276	RAB3D	Ras-related protein Rab-3D	0.29671	0.47	0.271604
P62259	1433E	14-3-3 protein epsilon	0.0743735	0.4701	0.271755
Q8R016	BLMH	Bleomycin hydrolase	0.0781847	0.4701	0.271905
Q99PL5	RRBP1	Ribosome-binding protein 1	-0.0745645	0.4703	0.272055
Q64331	MYO6	Myosin-VI	0.0906325	0.4708	0.272206
Q8JZY2	COMDA	COMM domain-containing protein 10	0.138293	0.4708	0.272356
Q9D1P0	RM13	39S ribosomal protein L13, mitochondrial	-0.0724963	0.471	0.272507
Q9CZX8	RS19	40S ribosomal protein S19	-0.0760882	0.4711	0.272657
O88508	DNM3A	DNA (cytosine-5)-methyltransferase 3A	0.158299	0.472	0.272807
P23506	PIMT	Protein-L-isoaspartate(D-aspartate) O-methyltransferase	-0.0864594	0.4721	0.272958
P01786	HVM17	Ig heavy chain V region MOPC 47A	0.0909963	0.4728	0.273108
P29699	FETUA	Alpha-2-HS-glycoprotein	-0.0830304	0.4728	0.273259
Q8VC30	DHAK	Bifunctional ATP-dependent dihydroxyacetone kinase/FAD-AMP lyase (cyclizing)	-0.0877741	0.473	0.273409
P46935	NEDD4	E3 ubiquitin-protein ligase NEDD4	0.0767804	0.4731	0.27356
O54974	LEG7	Galectin-7	0.104942	0.4732	0.27371
Q9CX80	CYGB	Cytoglobin	-0.0786764	0.4733	0.27386
Q99LR1	ABD12	Monoacylglycerol lipase ABHD12	0.108957	0.4736	0.27401
Q9QZK2	BCAR3	Breast cancer anti-estrogen resistance protein 3	0.133432	0.4739	0.27416
Q9D0A0	DET1	DET1 homolog	-0.110546	0.4739	0.274309
Q91YI0	ARLY	Argininosuccinate lyase	-0.0791822	0.474	0.274459
Q9QX47	SON	Protein SON	0.0795546	0.4741	0.274608
Q8VDD5	MYH9	Myosin-9	-0.0736337	0.4744	0.274758
Q8BVE3	VATH	V-type proton ATPase subunit H	0.101781	0.4747	0.274907
Q9D1L0	CHCH2	Coiled-coil-helix-coiled-coil-helix domain-containing protein 2, mitochondrial	0.0903358	0.4748	0.275056
P16546	SPTA2	Spectrin alpha chain, brain	-0.0743398	0.4748	0.275206
Q9JLJ2	AL9A1	4-trimethylaminobutyraldehyde dehydrogenase	-0.0742233	0.4749	0.275354
Q8R2K1	CJ125	Protein fucU homolog	0.0951062	0.4751	0.275503
Q9QXS1	PLEC	Plectin	-0.0723514	0.4752	0.275652
P50427	STS	Steryl-sulfatase	0.0754681	0.4767	0.275802
Q9ERT9	PPR1A	Protein phosphatase 1 regulatory subunit 1A	0.155265	0.4769	0.275951
Q99KK7	DPP3	Dipeptidyl peptidase 3	-0.0779711	0.4774	0.276101
Q9JL21	CCR10	C-C chemokine receptor type 10	0.125374	0.4774	0.27625
P56695	WFS1	Wolframin	-0.0762453	0.4774	0.276399
Q3U2P1	SC24A	Protein transport protein Sec24A	-0.0808147	0.4784	0.276549
Q3UDE2	TTL12	Tubulin--tyrosine ligase-like protein 12	0.0774783	0.4785	0.276699
O70305	ATX2	Ataxin-2	0.1291	0.4786	0.276848
Q7TSI3	PP6R1	Serine/threonine-protein phosphatase 6 regulatory subunit 1	-0.148094	0.4786	0.276997
Q9EQP2	EHD4	EH domain-containing protein 4	-0.0743932	0.4789	0.277147
O70492	SNX3	Sorting nexin-3	-0.0747232	0.4789	0.277296
Q9D7B6	ACAD8	Isobutyryl-CoA dehydrogenase, mitochondrial	-0.076574	0.479	0.277445
Q8R0W0	EPIPL	Epiplakin	-0.101851	0.4794	0.277593
O70591	PFD2	Prefoldin subunit 2	-0.0758015	0.4794	0.277742
Q62376	RU17	U1 small nuclear ribonucleoprotein 70 kDa	-0.0821072	0.4796	0.277891
Q9Z1R4	CF047	Uncharacterized protein C6orf47 homolog	-0.0847572	0.4797	0.278039
Q9WV32	ARC1B	Actin-related protein 2/3 complex subunit 1B	-0.071508	0.4801	0.278188
Q9DCM2	GSTK1	Glutathione S-transferase kappa 1	0.0843925	0.4801	0.278336
Q99JB2	STML2	Stomatin-like protein 2	-0.0816816	0.4804	0.278485
P06344	HB2U	H-2 class II histocompatibility antigen, A-U beta chain	-0.101835	0.4806	0.278633
Q9WV98	TIM9	Mitochondrial import inner membrane translocase subunit Tim9	0.0774993	0.4807	0.278781
Q9JM93	AR6P4	ADP-ribosylation factor-like protein 6-interacting protein 4	0.0728147	0.4807	0.278929
Q9EPX2	PPN	Papilin	-0.0666415	0.4809	0.279077
Q61081	CDC37	Hsp90 co-chaperone Cdc37	0.0814871	0.481	0.279225
Q9QXT0	CNPY2	Protein canopy homolog 2	-0.075437	0.4811	0.279372
Q6A009	LTN1	E3 ubiquitin-protein ligase listerin	-0.0791447	0.4815	0.27952
Q80VP2	SPAT7	Spermatogenesis-associated protein 7 homolog	0.0834424	0.4815	0.279667
Q9D2Y4	MLKL	Mixed lineage kinase domain-like protein	0.0770251	0.4821	0.279815
Q3U4G3	CC021	Uncharacterized protein C3orf21 homolog	0.0982135	0.4823	0.279962
Q3UIU2	NDUB6	NADH dehydrogenase [ubiquinone] 1 beta subcomplex subunit 6	-0.080806	0.4824	0.28011
P12815	PDCD6	Programmed cell death protein 6	-0.0755082	0.4827	0.280257
Q3TIU4	PDE12	2',5'-phosphodiesterase 12	-0.0831192	0.4829	0.280405
Q8C0X0	LCA5L	Lebercilin-like protein	-0.0147449	0.4831	0.280552
Q9R0Q9	MPU1	Mannose-P-dolichol utilization defect 1 protein	-0.083386	0.4837	0.280699
O54901	OX2G	OX-2 membrane glycoprotein	-0.0740852	0.4842	0.280847
Q6IQX7	CHSS2	Chondroitin sulfate synthase 2	-0.0777069	0.4849	0.280995
P51125	ICAL	Calpastatin	0.0772079	0.485	0.281143
Q9CQH3	NDUB5	NADH dehydrogenase [ubiquinone] 1 beta subcomplex subunit 5, mitochondrial	0.0733013	0.4852	0.281291
B1B1A0	LMBL4	Lethal(3)malignant brain tumor-like protein 4	-0.0909365	0.4852	0.281438
Q9WTV7	RNF12	E3 ubiquitin-protein ligase RLIM	0.161767	0.4854	0.281586
Q91VK1	BZW2	Basic leucine zipper and W2 domain-containing protein 2	-0.0888925	0.4854	0.281733
P35762	CD81	CD81 antigen	-0.0821324	0.4862	0.281881
Q3V3R4	ITA1	Integrin alpha-1	0.0769432	0.4866	0.282028
Q922Q8	LRC59	Leucine-rich repeat-containing protein 59	-0.0706481	0.4867	0.282176
Q99P87	RETN	Resistin	-0.0745873	0.4868	0.282323
Q3TBD2	HMHA1	Minor histocompatibility protein HA-1	0.0826647	0.4869	0.282471
P09568	LY6C2	Lymphocyte antigen 6C2	0.106512	0.4869	0.282618
Q99K01	PDXD1	Pyridoxal-dependent decarboxylase domain-containing protein 1	0.0746569	0.4871	0.282765
Q60976	JERKY	Jerky protein	-0.0765698	0.4871	0.282911
Q9Z172	SUMO3	Small ubiquitin-related modifier 3	-0.0743881	0.4875	0.283058
Q9JIG7	CCD22	Coiled-coil domain-containing protein 22	0.0704407	0.4875	0.283205
Q9JKX6	NUDT5	ADP-sugar pyrophosphatase	-0.0912189	0.4876	0.283352
Q9Z0E0	NCDN	Neurochondrin	0.115256	0.488	0.283498
Q9DBJ1	PGAM1	Phosphoglycerate mutase 1	0.0716833	0.488	0.283645
Q9QYJ0	DNJA2	DnaJ homolog subfamily A member 2	-0.0714489	0.4883	0.283791
Q3UFY7	5NT3L	Cytosolic 5'-nucleotidase III-like protein	-0.0847306	0.4884	0.283937
Q8R0Y6	FTHFD	10-formyltetrahydrofolate dehydrogenase	-0.0714912	0.4885	0.284083
Q99K23	UFSP2	Ufm1-specific protease 2	0.0775185	0.4887	0.284229
O54785	LIMK2	LIM domain kinase 2	-0.0834566	0.4889	0.284375
Q62179	SEM4B	Semaphorin-4B	-0.0634376	0.4893	0.284521
P28654	PGS2	Decorin	-0.0722649	0.4894	0.284667
Q61554	FBN1	Fibrillin-1	0.0740909	0.4894	0.284813
Q9JLV5	CUL3	Cullin-3	-0.0796158	0.4896	0.284959
P82347	SGCD	Delta-sarcoglycan	-0.0710663	0.4898	0.285104
P55002	MFAP2	Microfibrillar-associated protein 2	0.0448818	0.4899	0.28525
Q9CY62	RN181	E3 ubiquitin-protein ligase RNF181	0.342807	0.4899	0.285395
P49722	PSA2	Proteasome subunit alpha type-2	-0.0726092	0.49	0.28554
P97449	AMPN	Aminopeptidase N	-0.0997753	0.4901	0.285685
Q9CVB6	ARPC2	Actin-related protein 2/3 complex subunit 2	-0.0734716	0.4905	0.28583
Q8R1G2	CMBL	Carboxymethylenebutenolidase homolog	-0.073881	0.4907	0.285975
O54754	ADO	Aldehyde oxidase	-0.0742517	0.4907	0.28612
P56384	AT5G3	ATP synthase lipid-binding protein, mitochondrial	0.0818352	0.4911	0.286265
P98203	ARVC	Armadillo repeat protein deleted in velo-cardio-facial syndrome homolog	0.0577359	0.4914	0.28641
P28063	PSB8	Proteasome subunit beta type-8	0.0872357	0.4915	0.286554
Q06770	CBG	Corticosteroid-binding globulin	0.0777312	0.4918	0.286699
Q64737	PUR2	Trifunctional purine biosynthetic protein adenosine-3	0.0739982	0.4919	0.286844
Q921J2	RHEB	GTP-binding protein Rheb	0.0732227	0.4926	0.286989
Q9CR20	IR3IP	Immediate early response 3-interacting protein 1	0.074441	0.4934	0.287134
Q61555	FBN2	Fibrillin-2	0.0757504	0.4934	0.287279
O35298	AOAH	Acyloxyacyl hydrolase	-0.0711622	0.4941	0.287424
Q9CQX2	CYB5B	Cytochrome b5 type B	0.0697705	0.4945	0.28757
Q9CR21	ACPM	Acyl carrier protein, mitochondrial	0.0700515	0.4949	0.287715
O70362	PHLD	Phosphatidylinositol-glycan-specific phospholipase D	0.101033	0.4955	0.287861
P58774	TPM2	Tropomyosin beta chain	-0.0590075	0.4958	0.288007
P83510	TNIK	Traf2 and NCK-interacting protein kinase	0.0737089	0.4961	0.288152
Q9QUM9	PSA6	Proteasome subunit alpha type-6	-0.0730549	0.4962	0.288298
P62717	RL18A	60S ribosomal protein L18a	-0.0775905	0.4963	0.288443
Q76MZ3	2AAA	Serine/threonine-protein phosphatase 2A 65 kDa regulatory subunit A alpha isoform	-0.0697475	0.4964	0.288589
Q61001	LAMA5	Laminin subunit alpha-5	0.116305	0.4969	0.288734
Q8R370	USBP1	Usher syndrome type-1C protein-binding protein 1	0.07139	0.4969	0.288879
Q8CFH6	SIK2	Serine/threonine-protein kinase SIK2	-0.0547569	0.4973	0.289025
Q9QZX7	SRR	Serine racemase	-0.0716124	0.4977	0.28917
Q99J39	DCMC	Malonyl-CoA decarboxylase, mitochondrial	0.0462255	0.4979	0.289316
Q3TCN2	PLBL2	Putative phospholipase B-like 2	0.0671434	0.4982	0.289461
P52760	UK114	Ribonuclease UK114	0.0724493	0.4984	0.289606
Q9ER56	CAN12	Calpain-12	-0.0774994	0.4984	0.289751
P98192	GNPAT	Dihydroxyacetone phosphate acyltransferase	0.0560107	0.4988	0.289896
Q8C052	MAP1S	Microtubule-associated protein 1S	-0.0729236	0.499	0.290042
Q9JKF1	IQGA1	Ras GTPase-activating-like protein IQGAP1	-0.0702135	0.499	0.290186
Q99PV0	PRP8	Pre-mRNA-processing-splicing factor 8	-0.0440026	0.4991	0.290331
Q8BP86	SNPC4	snRNA-activating protein complex subunit 4	-0.0541904	0.4992	0.290476
Q8K0T4	KATL1	Katanin p60 ATPase-containing subunit A-like 1	-0.0698019	0.4993	0.29062
P62737	ACTA	Actin, aortic smooth muscle	-0.0737137	0.4994	0.290765
Q9DB05	SNAA	Alpha-soluble NSF attachment protein	0.083437	0.4996	0.290909
Q9CX56	PSMD8	26S proteasome non-ATPase regulatory subunit 8	0.0720455	0.4996	0.291053
Q6P9S7	GLT10	Polypeptide N-acetylgalactosaminyltransferase 10	0.131744	0.4997	0.291197
O08808	DIAP1	Protein diaphanous homolog 1	0.0831423	0.5	0.291341
Q8BH97	RCN3	Reticulocalbin-3	-0.0700124	0.5007	0.291486
Q8CJI4	H1FNT	Testis-specific H1 histone	-0.0700841	0.5009	0.29163
Q6XP49	GLIS3	Zinc finger protein GLIS3	0.072379	0.501	0.291774
Q8BI72	CARF	CDKN2A-interacting protein	-0.079878	0.5013	0.291918
Q7TSY8	SGOL2	Shugoshin-like 2	-0.0681491	0.5016	0.292062
Q9D8W5	PSD12	26S proteasome non-ATPase regulatory subunit 12	0.0673699	0.5021	0.292206
Q8BVL3	SNX17	Sorting nexin-17	0.0786118	0.5021	0.29235
Q9Z1R2	BAG6	Large proline-rich protein BAG6	-0.0456859	0.5022	0.292494
Q6PDL0	DC1L2	Cytoplasmic dynein 1 light intermediate chain 2	-0.0898067	0.5023	0.292638
Q8VCG4	CO8G	Complement component C8 gamma chain	-0.0783471	0.5024	0.292782
Q6EDY6	LR16A	Leucine-rich repeat-containing protein 16A	0.0829029	0.5025	0.292925
Q02819	NUCB1	Nucleobindin-1	0.0739396	0.5026	0.293069
Q6R3M4	POLI	DNA polymerase iota	0.065442	0.5027	0.293212
Q9CWL8	CTBL1	Beta-catenin-like protein 1	0.0722309	0.5029	0.293355
Q8CIP4	MARK4	MAP/microtubule affinity-regulating kinase 4	-0.0149183	0.5032	0.293498
P50172	DHI1	Corticosteroid 11-beta-dehydrogenase isozyme 1	0.0694865	0.5035	0.293642
P51410	RL9	60S ribosomal protein L9	-0.0662799	0.5035	0.293785
Q8R3Y8	I2BP1	Interferon regulatory factor 2-binding protein 1	-0.0376138	0.5041	0.293928
Q922Q1	MOSC2	MOSC domain-containing protein 2, mitochondrial	-0.070125	0.5044	0.294071
Q91W39	NCOA5	Nuclear receptor coactivator 5	0.150035	0.5046	0.294215
Q6PB93	GALT2	Polypeptide N-acetylgalactosaminyltransferase 2	0.0651661	0.5047	0.294358
Q8BFQ8	PDDC1	Parkinson disease 7 domain-containing protein 1	-0.0672125	0.5047	0.294501
P61089	UBE2N	Ubiquitin-conjugating enzyme E2 N	-0.0681885	0.5048	0.294643
P42567	EPS15	Epidermal growth factor receptor substrate 15	-0.0713021	0.5049	0.294786
Q9R0Q3	TMED2	Transmembrane emp24 domain-containing protein 2	-0.065566	0.505	0.294928
Q9CPR4	RL17	60S ribosomal protein L17	-0.0668505	0.5052	0.295071
P70195	PSB7	Proteasome subunit beta type-7	0.0595252	0.5053	0.295213
Q9WTM3	SEM6C	Semaphorin-6C	-0.0515545	0.5053	0.295355
Q8VHX6	FLNC	Filamin-C	-0.0616192	0.5054	0.295497
Q9JIW9	RALB	Ras-related protein Ral-B	0.0864268	0.5054	0.295639
Q8VDM4	PSMD2	26S proteasome non-ATPase regulatory subunit 2	-0.0701449	0.5057	0.295781
P51881	ADT2	ADP/ATP translocase 2	-0.0674429	0.5061	0.295923
Q9D1J1	NECP2	Adaptin ear-binding coat-associated protein 2	-0.052059	0.5064	0.296065
P59383	LRRN4	Leucine-rich repeat neuronal protein 4	-0.0213174	0.5066	0.296207
Q8BHG1	NRDC	Nardilysin	0.0221878	0.5069	0.296349
Q66L42	M3K10	Mitogen-activated protein kinase kinase kinase 10	0.0694709	0.5076	0.296491
Q8R127	SCPDH	Probable saccharopine dehydrogenase	-0.0648603	0.5078	0.296633
Q6PD03	2A5A	Serine/threonine-protein phosphatase 2A 56 kDa regulatory subunit alpha isoform	-0.0694406	0.508	0.296775
Q9Z1G4	VPP1	V-type proton ATPase 116 kDa subunit a isoform 1	0.106339	0.5082	0.296917
Q99MN1	SYK	Lysyl-tRNA synthetase	0.0666748	0.5083	0.297059
Q9WTR1	TRPV2	Transient receptor potential cation channel subfamily V member 2	-0.0669722	0.5088	0.297201
Q02248	CTNB1	Catenin beta-1	0.0819277	0.5091	0.297343
P41233	ABCA1	ATP-binding cassette sub-family A member 1	-0.0812462	0.5094	0.297485
Q9CY58	PAIRB	Plasminogen activator inhibitor 1 RNA-binding protein	-0.0687902	0.5094	0.297627
Q09014	NCF1	Neutrophil cytosol factor 1	-0.0656946	0.5095	0.297768
Q80SW1	SAHH2	Putative adenosylhomocysteinase 2	0.0914142	0.5097	0.29791
B7ZMP1	XPP3	Probable Xaa-Pro aminopeptidase 3	0.035607	0.5097	0.298052
P62264	RS14	40S ribosomal protein S14	-0.0669805	0.5097	0.298193
Q9D517	PLCC	1-acyl-sn-glycerol-3-phosphate acyltransferase gamma	-0.0397069	0.5104	0.298334
Q9D3D9	ATPD	ATP synthase subunit delta, mitochondrial	0.0698492	0.5108	0.298476
P09055	ITB1	Integrin beta-1	0.0709502	0.5113	0.298618
Q5H8A1	NMS	Neuromedin-S	0.0686566	0.5115	0.29876
Q5FWK3	RHG01	Rho GTPase-activating protein 1	0.0679207	0.5116	0.298901
P61759	PFD3	Prefoldin subunit 3	-0.00824117	0.5126	0.299043
Q9DBC7	KAP0	cAMP-dependent protein kinase type I-alpha regulatory subunit	-0.135929	0.5128	0.299185
P03966	MYCN	N-myc proto-oncogene protein	0.0614806	0.5129	0.299327
Q9JJI8	RL38	60S ribosomal protein L38	-0.0665607	0.5131	0.299469
P59017	B2L13	Bcl-2-like protein 13	-0.0648779	0.5136	0.299611
Q9CQ54	NDUC2	NADH dehydrogenase [ubiquinone] 1 subunit C2	-0.000935143	0.5136	0.299753
P08121	CO3A1	Collagen alpha-1(III) chain	-0.0715644	0.5137	0.299895
Q61129	CFAI	Complement factor I	0.0947233	0.515	0.300037
Q925I1	ATAD3	ATPase family AAA domain-containing protein 3	0.1102	0.5153	0.300179
Q8BYA0	TBCD	Tubulin-specific chaperone D	0.0670235	0.5154	0.300322
P42669	PURA	Transcriptional activator protein Pur-alpha	0.0663743	0.5155	0.300464
Q04447	KCRB	Creatine kinase B-type	0.0688962	0.5158	0.300606
P42703	LIFR	Leukemia inhibitory factor receptor	-0.0446926	0.516	0.300748
Q8R1S0	COQ6	Ubiquinone biosynthesis monooxygenase COQ6	0.0588143	0.5161	0.30089
Q8K007	SULF1	Extracellular sulfatase Sulf-1	0.0490095	0.5165	0.301032
Q9Z1Z0	USO1	General vesicular transport factor p115	-0.066685	0.5166	0.301174
P28474	ADHX	Alcohol dehydrogenase class-3	0.062584	0.5167	0.301316
Q8BPB0	MOL1A	Mps one binder kinase activator-like 1A	-0.0610889	0.5167	0.301457
Q8BJ71	NUP93	Nuclear pore complex protein Nup93	0.0613296	0.517	0.301599
Q9D1X0	NOL3	Nucleolar protein 3	0.0636936	0.5171	0.30174
Q91W92	BORG5	Cdc42 effector protein 1	0.0640743	0.5175	0.301882
Q9CQ80	VPS25	Vacuolar protein-sorting-associated protein 25	-0.0398662	0.5176	0.302023
Q91VA6	PDIP2	Polymerase delta-interacting protein 2	-0.0770399	0.5181	0.302165
Q62446	FKBP3	Peptidyl-prolyl cis-trans isomerase FKBP3	-0.0657535	0.5183	0.302307
P11589	MUP2	Major urinary protein 2	-0.0210365	0.5184	0.302448
P62855	RS26	40S ribosomal protein S26	0.0612503	0.5185	0.302589
Q71RI9	KAT3	Kynurenine--oxoglutarate transaminase 3	0.0634909	0.5185	0.30273
Q91ZU6	DYST	Dystonin	0.0657841	0.5186	0.302871
P40124	CAP1	Adenylyl cyclase-associated protein 1	-0.065862	0.5188	0.303012
Q9D1G1	RAB1B	Ras-related protein Rab-1B	-0.0660589	0.5192	0.303153
P70180	ANPRC	Atrial natriuretic peptide receptor 3	0.0617014	0.5194	0.303294
Q91WK2	EIF3H	Eukaryotic translation initiation factor 3 subunit H	0.0647399	0.5198	0.303435
A2ADY9	DDI2	Protein DDI1 homolog 2	0.0515438	0.5199	0.303576
O09172	GSH0	Glutamate--cysteine ligase regulatory subunit	-0.0620641	0.5199	0.303717
Q8K4G5	ABLM1	Actin-binding LIM protein 1	0.0600901	0.5204	0.303858
Q8R0X7	SGPL1	Sphingosine-1-phosphate lyase 1	0.0819789	0.5207	0.303999
Q8JZQ2	AFG32	AFG3-like protein 2	-0.0613051	0.521	0.30414
Q8K2Y9	CCM2	Malcavernin	0.0295782	0.521	0.30428
Q9JKB3	DBPA	DNA-binding protein A	-0.0734328	0.522	0.304422
Q8VC28	AK1CD	Aldo-keto reductase family 1 member C13	0.0624365	0.5229	0.304563
Q62059	CSPG2	Versican core protein	0.0638579	0.5231	0.304705
Q8VEM8	MPCP	Phosphate carrier protein, mitochondrial	0.0686938	0.5231	0.304846
Q9QUR6	PPCE	Prolyl endopeptidase	0.0658064	0.5232	0.304987
Q6PB66	LPPRC	Leucine-rich PPR motif-containing protein, mitochondrial	0.0622896	0.5239	0.305129
Q9Z2Y8	PROSC	Proline synthase co-transcribed bacterial homolog protein	0.0448671	0.5241	0.30527
Q8C7X2	K0090	Uncharacterized protein KIAA0090	-0.0641573	0.5242	0.305412
Q9QYC0	ADDA	Alpha-adducin	-0.0399581	0.5243	0.305553
P55096	ABCD3	ATP-binding cassette sub-family D member 3	0.0582908	0.5244	0.305694
O09164	SODE	Extracellular superoxide dismutase [Cu-Zn]	0.0632668	0.5249	0.305835
Q9QZJ6	MFAP5	Microfibrillar-associated protein 5	-0.0193573	0.525	0.305976
P50543	S10AB	Protein S100-A11	0.0658808	0.5252	0.306117
Q9R1P1	PSB3	Proteasome subunit beta type-3	0.0514564	0.5254	0.306258
Q91ZA3	PCCA	Propionyl-CoA carboxylase alpha chain, mitochondrial	0.0601505	0.5256	0.306399
Q6QIY3	SCNAA	Sodium channel protein type 10 subunit alpha	0.0630121	0.5258	0.30654
P24369	PPIB	Peptidyl-prolyl cis-trans isomerase B	-0.0669803	0.5258	0.306681
Q9CZW5	TOM70	Mitochondrial import receptor subunit TOM70	0.0523467	0.526	0.306822
Q5DTY9	KCD16	BTB/POZ domain-containing protein KCTD16	-0.0321497	0.5264	0.306963
P97370	AT1B3	Sodium/potassium-transporting ATPase subunit beta-3	0.0594938	0.5264	0.307103
P63242	IF5A1	Eukaryotic translation initiation factor 5A-1	0.0666959	0.5265	0.307244
Q9CRC8	LRC40	Leucine-rich repeat-containing protein 40	0.0650558	0.5267	0.307384
Q8BM92	CADH7	Cadherin-7	-0.00964238	0.5273	0.307525
P62774	MTPN	Myotrophin	-0.0531907	0.5275	0.307665
Q7TQD2	TPPP	Tubulin polymerization-promoting protein	0.00453434	0.5275	0.307805
P62862	RS30	40S ribosomal protein S30	-0.0628027	0.5276	0.307946
Q9JJU8	SH3L1	SH3 domain-binding glutamic acid-rich-like protein	-0.0611084	0.5279	0.308086
Q60519	SEM5B	Semaphorin-5B	0.0622665	0.528	0.308226
Q8VCF0	MAVS	Mitochondrial antiviral-signaling protein	0.0538581	0.5281	0.308366
Q9Z2Z6	MCAT	Mitochondrial carnitine/acylcarnitine carrier protein	-0.0639756	0.5282	0.308506
O35465	FKBP8	Peptidyl-prolyl cis-trans isomerase FKBP8	0.0588816	0.5286	0.308646
Q8VED2	CNO	Protein cappuccino	0.0928288	0.5286	0.308786
P47757	CAPZB	F-actin-capping protein subunit beta	0.0657393	0.5286	0.308926
P26883	FKB1A	Peptidyl-prolyl cis-trans isomerase FKBP1A	0.0656511	0.5289	0.309065
P58771	TPM1	Tropomyosin alpha-1 chain	-0.0631734	0.5289	0.309205
Q9WVC3	CAV2	Caveolin-2	-0.0620453	0.5291	0.309344
Q8R2Y8	PTH2	Peptidyl-tRNA hydrolase 2, mitochondrial	0.054844	0.5292	0.309484
Q9CWJ9	PUR9	Bifunctional purine biosynthesis protein PURH	0.0666181	0.5292	0.309623
Q8C0L6	PAOX	Peroxisomal N(1)-acetyl-spermine/spermidine oxidase	-0.0245358	0.5297	0.309762
Q9WTR5	CAD13	Cadherin-13	-0.0620657	0.5297	0.309901
Q8CCS6	PABP2	Polyadenylate-binding protein 2	-0.0532468	0.5303	0.31004
Q62186	SSRD	Translocon-associated protein subunit delta	0.0596252	0.5305	0.31018
Q9D6Z1	NOP56	Nucleolar protein 56	0.0596737	0.5305	0.310319
Q8CH09	SUGP2	SURP and G-patch domain-containing protein 2	0.0497471	0.5306	0.310458
P58742	AAAS	Aladin	-0.0383711	0.5307	0.310597
Q5XG73	ACBD5	Acyl-CoA-binding domain-containing protein 5	0.054547	0.531	0.310736
A2AJA9	CI172	Uncharacterized protein C9orf172 homolog	0.0491822	0.531	0.310874
Q8BFW7	LPP	Lipoma-preferred partner homolog	0.0609957	0.5311	0.311013
Q9DCV4	RMD1	Regulator of microtubule dynamics protein 1	0.06145	0.5313	0.311151
Q9D1H7	GET4	Golgi to ER traffic protein 4 homolog	-0.037899	0.5314	0.31129
Q99JW4	LIMS1	LIM and senescent cell antigen-like-containing domain protein 1	-0.0631833	0.5316	0.311428
Q60770	STXB3	Syntaxin-binding protein 3	0.0553262	0.5322	0.311567
P27546	MAP4	Microtubule-associated protein 4	-0.0662287	0.5323	0.311705
Q01853	TERA	Transitional endoplasmic reticulum ATPase	-0.065036	0.5325	0.311844
Q3UTJ2	SRBS2	Sorbin and SH3 domain-containing protein 2	0.0492898	0.5326	0.311982
Q8R2S1	RPKL1	Ribosomal protein S6 kinase-like 1	-0.0484087	0.5329	0.31212
Q8BZR9	CQ085	Uncharacterized protein C17orf85 homolog	0.0412122	0.5336	0.312259
P80317	TCPZ	T-complex protein 1 subunit zeta	-0.0625689	0.5336	0.312397
Q8VDQ1	PTGR2	Prostaglandin reductase 2	0.0852351	0.5337	0.312536
Q91ZJ5	UGPA	UTP--glucose-1-phosphate uridylyltransferase	-0.0595555	0.534	0.312674
Q8CH77	NAV1	Neuron navigator 1	0.135982	0.5341	0.312812
Q9Z2G6	SE1L1	Protein sel-1 homolog 1	0.0500714	0.5343	0.31295
Q9CWW7	CXXC1	CpG-binding protein	-0.0379171	0.5349	0.313089
Q3U487	HECD3	E3 ubiquitin-protein ligase HECTD3	0.0592751	0.5349	0.313227
Q8BMJ3	IF1AX	Eukaryotic translation initiation factor 1A, X-chromosomal	-0.0579785	0.5351	0.313365
Q8BIY1	GPTC3	G patch domain-containing protein 3	-0.0569599	0.5352	0.313503
P97461	RS5	40S ribosomal protein S5	-0.0660968	0.5354	0.313641
Q9R269	PEPL	Periplakin	-0.0349508	0.5359	0.313779
Q91W61	FBX37	F-box only protein 37	0.018082	0.5359	0.313917
Q9CQ60	6PGL	6-phosphogluconolactonase	0.0641499	0.5359	0.314055
P27612	PLAP	Phospholipase A-2-activating protein	-0.0455339	0.536	0.314193
P49222	EPB42	Erythrocyte membrane protein band 4.2	-0.0535115	0.5363	0.31433
P08228	SODC	Superoxide dismutase [Cu-Zn]	-0.0651398	0.5366	0.314468
Q6A000	K0753	Uncharacterized protein KIAA0753	0.0425967	0.5366	0.314606
Q9CPT4	CS010	UPF0556 protein C19orf10 homolog	0.0155446	0.5368	0.314743
P54310	LIPS	Hormone-sensitive lipase	-0.0644302	0.5369	0.314881
Q6PDJ6	FBX42	F-box only protein 42	0.0380362	0.537	0.315018
Q8BI84	MIA3	Melanoma inhibitory activity protein 3	-0.0547065	0.5371	0.315155
Q60692	PSB6	Proteasome subunit beta type-6	0.0595047	0.5377	0.315292
Q9D7E4	CS025	UPF0449 protein C19orf25 homolog	0.0212508	0.5378	0.31543
Q8CGW4	SOX30	Transcription factor SOX-30	0.00951694	0.5378	0.315567
P59644	PI5PA	Phosphatidylinositol 4,5-bisphosphate 5-phosphatase A	-0.0494231	0.5378	0.315704
P70701	WN10A	Protein Wnt-10a	0.0521679	0.538	0.315841
P07309	TTHY	Transthyretin	-0.0305278	0.5383	0.315977
Q8R0N6	HOT	Hydroxyacid-oxoacid transhydrogenase, mitochondrial	-0.0600628	0.5383	0.316114
Q3THK7	GUAA	GMP synthase [glutamine-hydrolyzing]	-0.0629904	0.5383	0.316251
Q66JV7	CH058	Uncharacterized protein C8orf58 homolog	-0.0171349	0.5385	0.316387
Q9R008	KIME	Mevalonate kinase	0.0358425	0.5386	0.316524
Q8BJU0	SGTA	Small glutamine-rich tetratricopeptide repeat-containing protein alpha	0.0584127	0.5387	0.31666
P49312	ROA1	Heterogeneous nuclear ribonucleoprotein A1	-0.0589054	0.5392	0.316796
Q8BP47	SYNC	Asparaginyl-tRNA synthetase, cytoplasmic	0.0408458	0.5397	0.316933
Q9D903	EBP2	Probable rRNA-processing protein EBP2	0.0162549	0.5401	0.31707
Q5BL07	PEX1	Peroxisome biogenesis factor 1	-0.0451548	0.5403	0.317206
P62983	RS27A	Ubiquitin-40S ribosomal protein S27a	-0.066263	0.5415	0.317343
Q64339	ISG15	Ubiquitin-like protein ISG15	0.0560347	0.5417	0.317481
Q5SUC9	SCO1	Protein SCO1 homolog, mitochondrial	0.0422959	0.5418	0.317618
Q8VIJ6	SFPQ	Splicing factor, proline- and glutamine-rich	-0.0605201	0.5422	0.317755
Q64378	FKBP5	Peptidyl-prolyl cis-trans isomerase FKBP5	-0.0316269	0.5423	0.317892
P56480	ATPB	ATP synthase subunit beta, mitochondrial	0.0658868	0.5424	0.318029
P70677	CASP3	Caspase-3	0.047788	0.5426	0.318166
Q640R3	HECAM	Hepatocyte cell adhesion molecule	-0.00410042	0.5428	0.318302
Q9D3R6	KATL2	Katanin p60 ATPase-containing subunit A-like 2	-0.00757491	0.5433	0.318439
P07091	S10A4	Protein S100-A4	0.0426218	0.5436	0.318576
Q9JIF7	COPB	Coatomer subunit beta	-0.0632662	0.5436	0.318713
Q9JIY5	HTRA2	Serine protease HTRA2, mitochondrial	-0.0280296	0.5441	0.31885
Q8BGT9	GLT12	Polypeptide N-acetylgalactosaminyltransferase 12	0.0323808	0.5442	0.318987
P34152	FAK1	Focal adhesion kinase 1	-0.00932015	0.5443	0.319123
Q9CQ92	FIS1	Mitochondrial fission 1 protein	0.0298151	0.5447	0.31926
Q9JHJ0	TMOD3	Tropomodulin-3	-0.0295202	0.5451	0.319397
P29391	FRIL1	Ferritin light chain 1	-0.0594995	0.5455	0.319534
Q9CYR6	AGM1	Phosphoacetylglucosamine mutase	0.0778226	0.5457	0.319671
Q8K4L3	SVIL	Supervillin	0.0189516	0.5457	0.319808
Q9CWN7	CB029	UPF0760 protein C2orf29 homolog	-0.058419	0.5458	0.319944
Q64727	VINC	Vinculin	-0.0637011	0.5458	0.320081
Q80YR5	SAFB2	Scaffold attachment factor B2	-0.0316155	0.546	0.320217
Q8K1N1	PLPL8	Calcium-independent phospholipase A2-gamma	-0.0309007	0.546	0.320354
Q8K297	GT251	Procollagen galactosyltransferase 1	0.0445372	0.5461	0.32049
Q9DBL9	ABHD5	1-acylglycerol-3-phosphate O-acyltransferase ABHD5	-0.0623232	0.5462	0.320626
P00687	AMY1	Alpha-amylase 1	-0.0617665	0.5464	0.320762
Q9D8E6	RL4	60S ribosomal protein L4	-0.05848	0.5464	0.320898
P97872	FMO5	Dimethylaniline monooxygenase [N-oxide-forming] 5	-0.0365824	0.5466	0.321033
Q08619	IFI5B	Interferon-activable protein 205-B	0.0347729	0.5476	0.32117
Q9D2G2	ODO2	Dihydrolipoyllysine-residue succinyltransferase component of 2-oxoglutarate dehydrogenase complex, mitochondrial	0.055905	0.5476	0.321306
Q569L8	CENPJ	Centromere protein J	-0.0089106	0.5477	0.321442
Q6ZQH8	NU188	Nucleoporin NUP188 homolog	0.0537571	0.548	0.321578
Q9CQ22	PDRO	Ragulator complex protein PDRO	0.0285555	0.5483	0.321714
Q3TJD7	PDLI7	PDZ and LIM domain protein 7	-0.0480419	0.5485	0.32185
O35082	KLOT	Klotho	-0.0511642	0.5485	0.321985
Q60772	CDN2C	Cyclin-dependent kinase 4 inhibitor C	0.0617166	0.549	0.322121
P63085	MK01	Mitogen-activated protein kinase 1	-0.0377245	0.549	0.322257
Q9CZ69	CKLF6	CKLF-like MARVEL transmembrane domain-containing protein 6	-0.0471679	0.5495	0.322393
Q8R123	FAD1	FAD synthase	-0.0554952	0.5497	0.322529
Q922J3	CLIP1	CAP-Gly domain-containing linker protein 1	0.0489425	0.5497	0.322665
Q80TL7	MON2	Protein MON2 homolog	-0.0125242	0.55	0.3228
Q8JZN5	ACAD9	Acyl-CoA dehydrogenase family member 9, mitochondrial	-0.0568976	0.55	0.322936
Q8BQ30	PHTNS	Phostensin	0.0663299	0.5501	0.323071
Q8K120	NFAC4	Nuclear factor of activated T-cells, cytoplasmic 4	0.0433588	0.5502	0.323207
P55849	DSC1	Desmocollin-1	-0.0333318	0.5504	0.323342
Q8BM72	HSP13	Heat shock 70 kDa protein 13	-0.0322819	0.5504	0.323477
Q8R2U6	NUDT4	Diphosphoinositol polyphosphate phosphohydrolase 2	-0.0474332	0.5505	0.323612
Q91VR2	ATPG	ATP synthase subunit gamma, mitochondrial	-0.0498067	0.5513	0.323748
Q9CXZ1	NDUS4	NADH dehydrogenase [ubiquinone] iron-sulfur protein 4, mitochondrial	0.0611241	0.5515	0.323883
P62874	GBB1	Guanine nucleotide-binding protein G(I)/G(S)/G(T) subunit beta-1	0.0531368	0.5518	0.324018
Q3TCH7	CUL4A	Cullin-4A	-0.0382801	0.5518	0.324153
Q91YP2	NEUL	Neurolysin, mitochondrial	0.0452462	0.552	0.324289
Q91Z53	GRHPR	Glyoxylate reductase/hydroxypyruvate reductase	-0.0594164	0.5521	0.324424
Q5XJY5	COPD	Coatomer subunit delta	-0.055437	0.5521	0.324559
Q9DAK9	PHP14	14 kDa phosphohistidine phosphatase	-0.0523759	0.5522	0.324693
Q99MQ4	ASPN	Asporin	0.0372399	0.5525	0.324828
Q80X85	RT07	28S ribosomal protein S7, mitochondrial	0.0486338	0.5527	0.324963
O08672	KIFC2	Kinesin-like protein KIFC2	-0.0444167	0.5527	0.325097
Q8VDL4	ADPGK	ADP-dependent glucokinase	0.0444987	0.5528	0.325232
Q8K4Z3	AIBP	Apolipoprotein A-I-binding protein	-0.0526811	0.5529	0.325366
Q9D6Y7	MSRA	Peptide methionine sulfoxide reductase	-0.054694	0.5529	0.325501
Q9JIK5	DDX21	Nucleolar RNA helicase 2	-0.0180083	0.553	0.325635
Q8BRN9	C2D1B	Coiled-coil and C2 domain-containing protein 1B	0.0249317	0.553	0.325769
Q8K1B8	URP2	Fermitin family homolog 3	0.0205329	0.5532	0.325903
Q61937	NPM	Nucleophosmin	0.00402805	0.5535	0.326037
Q9R0N0	GALK1	Galactokinase	-0.0377989	0.5538	0.326171
P52431	DPOD1	DNA polymerase delta catalytic subunit	0.0521222	0.5538	0.326304
Q3V0F0	RIMB3	RIMS-binding protein 3	-0.0375592	0.5542	0.326438
P70279	SURF6	Surfeit locus protein 6	-0.0296314	0.5543	0.326572
P62908	RS3	40S ribosomal protein S3	-0.0620953	0.5543	0.326706
Q9D7J9	ECHD3	Enoyl-CoA hydratase domain-containing protein 3, mitochondrial	0.0539151	0.5547	0.326839
Q923I7	SC5A2	Sodium/glucose cotransporter 2	-0.028825	0.5548	0.326973
Q9CZ13	QCR1	Cytochrome b-c1 complex subunit 1, mitochondrial	0.061082	0.5549	0.327107
Q6PH08	ERC2	ERC protein 2	-0.0482035	0.5549	0.32724
Q9Z0S9	PRAF1	Prenylated Rab acceptor protein 1	0.0509704	0.555	0.327373
Q9JLV1	BAG3	BAG family molecular chaperone regulator 3	0.0535983	0.555	0.327506
Q9Z0Z4	HEPH	Hephaestin	-0.0125876	0.5551	0.327639
Q8CIN4	PAK2	Serine/threonine-protein kinase PAK 2	-0.049601	0.5556	0.327773
P01887	B2MG	Beta-2-microglobulin	0.0526371	0.5557	0.327906
Q9QZ88	VPS29	Vacuolar protein sorting-associated protein 29	0.0550502	0.5559	0.328039
Q05117	PPA5	Tartrate-resistant acid phosphatase type 5	0.0331634	0.556	0.328172
P70372	ELAV1	ELAV-like protein 1	-0.0383037	0.5562	0.328304
Q8VCT3	AMPB	Aminopeptidase B	0.0535289	0.5562	0.328437
Q3UPH1	PRRC1	Protein PRRC1	0.0327427	0.5563	0.32857
O35479	HNRPG	Heterogeneous nuclear ribonucleoprotein G	-0.046354	0.5564	0.328702
P19536	COX5B	Cytochrome c oxidase subunit 5B, mitochondrial	0.0531231	0.5564	0.328835
Q60902	EP15R	Epidermal growth factor receptor substrate 15-like 1	0.00635226	0.5565	0.328967
Q52KR2	LRIG2	Leucine-rich repeats and immunoglobulin-like domains protein 2	-0.0420991	0.5565	0.329099
Q3U0M1	TPPC9	Trafficking protein particle complex subunit 9	0.0431088	0.5568	0.329231
Q9DCW4	ETFB	Electron transfer flavoprotein subunit beta	0.0604729	0.5569	0.329363
P54822	PUR8	Adenylosuccinate lyase	0.0222863	0.5578	0.329496
Q60631	GRB2	Growth factor receptor-bound protein 2	-0.0466046	0.5578	0.329628
Q9CWZ7	SNAG	Gamma-soluble NSF attachment protein	-0.0476718	0.558	0.32976
P50580	PA2G4	Proliferation-associated protein 2G4	-0.0544088	0.558	0.329892
Q921G7	ETFD	Electron transfer flavoprotein-ubiquinone oxidoreductase, mitochondrial	0.053846	0.5583	0.330024
P26039	TLN1	Talin-1	-0.0643759	0.5586	0.330157
Q61838	A2M	Alpha-2-macroglobulin	0.0570394	0.559	0.330289
Q921Q7	RIN1	Ras and Rab interactor 1	0.0329465	0.5594	0.330421
Q91WT8	RBM47	RNA-binding protein 47	0.0161048	0.5595	0.330553
O70566	DIAP2	Protein diaphanous homolog 2	-0.0246694	0.5599	0.330686
O08756	HCD2	3-hydroxyacyl-CoA dehydrogenase type-2	0.0612812	0.5599	0.330818
Q00519	XDH	Xanthine dehydrogenase/oxidase	-0.0581445	0.56	0.33095
Q3UPF5	ZCCHV	Zinc finger CCCH-type antiviral protein 1	-0.0497245	0.5602	0.331082
Q9DCZ4	APOO	Apolipoprotein O	-0.0105805	0.5602	0.331213
A2A432	CUL4B	Cullin-4B	0.0528864	0.5603	0.331345
Q61990	PCBP2	Poly(rC)-binding protein 2	-0.0465655	0.5604	0.331477
Q91YX5	LGAT1	Acyl-CoA:lysophosphatidylglycerol acyltransferase 1	-0.0480771	0.5615	0.331609
P56812	PDCD5	Programmed cell death protein 5	0.0441926	0.5616	0.331741
A2A8U2	TM201	Transmembrane protein 201	0.0295064	0.5616	0.331873
Q8R3B1	PLCD1	1-phosphatidylinositol-4,5-bisphosphate phosphodiesterase delta-1	0.0512597	0.5619	0.332005
P53657	KPYR	Pyruvate kinase isozymes R/L	-0.00921267	0.5622	0.332137
Q921S7	RM37	39S ribosomal protein L37, mitochondrial	-0.0576848	0.5624	0.332269
P01901	HA1B	H-2 class I histocompatibility antigen, K-B alpha chain	-0.0247449	0.5628	0.332401
P97819	PA2G6	85 kDa calcium-independent phospholipase A2	-0.0416866	0.5629	0.332532
Q9D1Q6	ERP44	Endoplasmic reticulum resident protein 44	0.00784178	0.5631	0.332664
Q4QRL3	CC88B	Coiled-coil domain-containing protein 88B	-0.0143091	0.5632	0.332796
Q8CAY6	THIC	Acetyl-CoA acetyltransferase, cytosolic	0.0544783	0.5634	0.332928
Q9DB20	ATPO	ATP synthase subunit O, mitochondrial	0.0581802	0.5638	0.333059
O54774	AP3D1	AP-3 complex subunit delta-1	-0.0299874	0.5641	0.333191
Q9DBL1	ACDSB	Short/branched chain specific acyl-CoA dehydrogenase, mitochondrial	-0.0482781	0.5643	0.333323
P08032	SPTA1	Spectrin alpha chain, erythrocyte	0.0566882	0.5644	0.333455
Q99LI8	HGS	Hepatocyte growth factor-regulated tyrosine kinase substrate	-0.0257787	0.5647	0.333586
Q99N94	RM09	39S ribosomal protein L9, mitochondrial	-0.0318821	0.5647	0.333718
Q60675	LAMA2	Laminin subunit alpha-2	0.0566943	0.5648	0.333849
P51163	HEM4	Uroporphyrinogen-III synthase	-0.0261877	0.565	0.333981
Q99JI6	RAP1B	Ras-related protein Rap-1b	0.0490216	0.5651	0.334112
Q9DBN5	LONP2	Lon protease homolog 2, peroxisomal	-0.0207132	0.5655	0.334243
P35487	ODPAT	Pyruvate dehydrogenase E1 component subunit alpha, testis-specific form, mitochondrial	0.0519199	0.5655	0.334375
Q9JJE7	FADS3	Fatty acid desaturase 3	-0.0248343	0.5657	0.334506
Q61107	GBP4	Guanylate-binding protein 4	-0.0360281	0.5661	0.334637
Q9JMH6	TRXR1	Thioredoxin reductase 1, cytoplasmic	0.0463341	0.5661	0.334768
O88207	CO5A1	Collagen alpha-1(V) chain	0.0484781	0.5662	0.334899
Q61133	GSTT2	Glutathione S-transferase theta-2	0.047978	0.5662	0.33503
Q8C0T1	FM1AB	Protein fem-1 homolog A-B	-0.0352234	0.5665	0.335161
Q8C129	LCAP	Leucyl-cystinyl aminopeptidase	0.047135	0.5666	0.335292
Q63844	MK03	Mitogen-activated protein kinase 3	-0.0422323	0.567	0.335423
Q61292	LAMB2	Laminin subunit beta-2	0.0578659	0.5671	0.335554
Q99L88	SNTB1	Beta-1-syntrophin	-0.0538197	0.5671	0.335684
Q61425	HCDH	Hydroxyacyl-coenzyme A dehydrogenase, mitochondrial	0.0521526	0.5675	0.335815
P46460	NSF	Vesicle-fusing ATPase	-0.0529663	0.5675	0.335946
Q6A058	ARMX2	Armadillo repeat-containing X-linked protein 2	0.037459	0.5676	0.336076
P26638	SYSC	Seryl-tRNA synthetase, cytoplasmic	0.0514427	0.5679	0.336207
Q9R0Y5	KAD1	Adenylate kinase isoenzyme 1	-0.0489084	0.5682	0.336337
Q5SSL4	ABR	Active breakpoint cluster region-related protein	0.0120864	0.5684	0.336468
P61202	CSN2	COP9 signalosome complex subunit 2	-0.0573146	0.5694	0.336599
Q5SX39	MYH4	Myosin-4	-0.0344818	0.57	0.33673
Q9WV66	MARH7	E3 ubiquitin-protein ligase MARCH7	-0.0263183	0.5701	0.336861
P21614	VTDB	Vitamin D-binding protein	0.0545848	0.5704	0.336992
Q64726	ZA2G	Zinc-alpha-2-glycoprotein	0.0291841	0.5704	0.337123
Q6PDY2	AEDO	2-aminoethanethiol dioxygenase	-0.0224171	0.5705	0.337254
Q9CZJ2	HS12B	Heat shock 70 kDa protein 12B	0.0459871	0.5706	0.337384
P21107	TPM3	Tropomyosin alpha-3 chain	-0.051752	0.5706	0.337515
Q91WQ3	SYYC	Tyrosyl-tRNA synthetase, cytoplasmic	-0.0483487	0.5706	0.337645
P17225	PTBP1	Polypyrimidine tract-binding protein 1	-0.0403959	0.5707	0.337776
Q60737	CSK21	Casein kinase II subunit alpha	-0.0405769	0.5708	0.337906
Q9EQH2	ERAP1	Endoplasmic reticulum aminopeptidase 1	-0.0258565	0.5709	0.338036
Q04857	CO6A1	Collagen alpha-1(VI) chain	0.0281085	0.5712	0.338166
Q62188	DPYL3	Dihydropyrimidinase-related protein 3	0.0385539	0.5715	0.338297
Q8BVD5	MPP7	MAGUK p55 subfamily member 7	0.0419021	0.5716	0.338427
P09470	ACE	Angiotensin-converting enzyme	0.084867	0.5716	0.338557
Q63918	SDPR	Serum deprivation-response protein	-0.0606385	0.5722	0.338687
Q921U8	SMTN	Smoothelin	0.0444064	0.5722	0.338817
P36371	TAP2	Antigen peptide transporter 2	-0.032537	0.5739	0.338948
Q8CFR0	C1QL2	Complement C1q-like protein 2	0.0366864	0.5739	0.339078
Q9D173	TOM7	Mitochondrial import receptor subunit TOM7 homolog	-0.0167141	0.5757	0.33921
P57776	EF1D	Elongation factor 1-delta	0.0585622	0.5757	0.339341
P35293	RAB18	Ras-related protein Rab-18	-0.0492744	0.5758	0.339473
Q99P30	NUDT7	Peroxisomal coenzyme A diphosphatase NUDT7	-0.00484073	0.576	0.339604
Q99M31	HSP7E	Heat shock 70 kDa protein 14	-0.0300608	0.5768	0.339735
P35282	RAB21	Ras-related protein Rab-21	0.037295	0.577	0.339867
P16332	MUTA	Methylmalonyl-CoA mutase, mitochondrial	0.0544668	0.5775	0.339999
Q9Z2N8	ACL6A	Actin-like protein 6A	0.0330859	0.5776	0.34013
O88561	S27A3	Long-chain fatty acid transport protein 3	0.0207841	0.578	0.340262
Q8BYJ6	TBCD4	TBC1 domain family member 4	0.0269132	0.578	0.340393
Q91V64	ISOC1	Isochorismatase domain-containing protein 1	0.0563559	0.578	0.340525
Q8BH02	CI167	Torsin family protein C9orf167 homolog	-0.0158365	0.5781	0.340656
P21279	GNAQ	Guanine nucleotide-binding protein G(q) subunit alpha	-0.0517618	0.5783	0.340787
Q9DBG3	AP2B1	AP-2 complex subunit beta	-0.0410912	0.579	0.340919
O55026	ENTP2	Ectonucleoside triphosphate diphosphohydrolase 2	-0.0497955	0.5795	0.34105
Q8BYU6	TOIP2	Torsin-1A-interacting protein 2	-0.03525	0.5797	0.341182
Q7TMB8	CYFP1	Cytoplasmic FMR1-interacting protein 1	-0.0475348	0.5798	0.341313
Q8C0M9	ASGL1	L-asparaginase	-0.0362374	0.58	0.341445
Q99PL6	UBXN6	UBX domain-containing protein 6	0.00382379	0.5806	0.341576
Q80XI3	IF4G3	Eukaryotic translation initiation factor 4 gamma 3	0.0356197	0.581	0.341708
O54865	GCYB1	Guanylate cyclase soluble subunit beta-1	0.0203639	0.5811	0.34184
Q8VD63	TSYL4	Testis-specific Y-encoded-like protein 4	-0.0288331	0.5817	0.341971
Q91YN5	UAP1	UDP-N-acetylhexosamine pyrophosphorylase	-0.00354073	0.582	0.342103
Q64310	SURF4	Surfeit locus protein 4	-0.0251011	0.5824	0.342235
O70503	DHB12	Estradiol 17-beta-dehydrogenase 12	0.0561763	0.5826	0.342367
Q8BGT5	ALAT2	Alanine aminotransferase 2	-0.0539818	0.5828	0.342499
P29788	VTNC	Vitronectin	-0.0281019	0.5833	0.342631
Q9D8X2	CC124	Coiled-coil domain-containing protein 124	0.0833094	0.5833	0.342762
Q9DB29	IAH1	Isoamyl acetate-hydrolyzing esterase 1 homolog	-0.0533691	0.5833	0.342894
Q91VR5	DDX1	ATP-dependent RNA helicase DDX1	-0.0349397	0.5833	0.343026
Q9R1Z7	PTPS	6-pyruvoyl tetrahydrobiopterin synthase	-0.0423739	0.5839	0.343157
Q8VDQ8	SIRT2	NAD-dependent deacetylase sirtuin-2	0.0426574	0.584	0.343289
Q62448	IF4G2	Eukaryotic translation initiation factor 4 gamma 2	-0.0231933	0.5841	0.34342
Q6ZWN5	RS9	40S ribosomal protein S9	-0.0561824	0.5842	0.343552
Q9QZE5	COPG	Coatomer subunit gamma	0.0465759	0.5844	0.343683
Q9CPP6	NDUA5	NADH dehydrogenase [ubiquinone] 1 alpha subcomplex subunit 5	-0.0155252	0.5854	0.343815
Q8K3J1	NDUS8	NADH dehydrogenase [ubiquinone] iron-sulfur protein 8, mitochondrial	0.0392547	0.5855	0.343947
Q99LF4	CV028	UPF0027 protein C22orf28 homolog	-0.0397486	0.5862	0.344079
Q8BX02	KANK2	KN motif and ankyrin repeat domain-containing protein 2	-0.0176091	0.5865	0.344211
Q8R1F1	NIBL1	Niban-like protein 1	0.00178825	0.5865	0.344343
Q9JJF3	NO66	Lysine-specific demethylase NO66	0.0100675	0.587	0.344474
P19253	RL13A	60S ribosomal protein L13a	-0.0256731	0.5871	0.344606
Q9CR86	CHSP1	Calcium-regulated heat stable protein 1	0.0122781	0.588	0.344739
P18572	BASI	Basigin	-0.0534613	0.588	0.344871
Q3V1L4	5NTC	Cytosolic purine 5'-nucleotidase	-0.0198517	0.5881	0.345003
Q8BVI4	DHPR	Dihydropteridine reductase	0.0422724	0.5881	0.345134
P05201	AATC	Aspartate aminotransferase, cytoplasmic	0.0256977	0.5882	0.345266
Q6ZPR6	IBTK	Inhibitor of Bruton tyrosine kinase	-0.0199203	0.5887	0.345398
Q8CIB5	FERM2	Fermitin family homolog 2	-0.0577115	0.589	0.34553
Q9DCH4	EIF3F	Eukaryotic translation initiation factor 3 subunit F	-0.0420241	0.589	0.345662
Q8BRT1	CLAP2	CLIP-associating protein 2	-0.0230561	0.5899	0.345794
P11152	LIPL	Lipoprotein lipase	0.0344552	0.5902	0.345926
Q9CZX9	TMM85	Transmembrane protein 85	0.0252915	0.5913	0.346058
P28352	APEX1	DNA-(apurinic or apyrimidinic site) lyase	0.0254271	0.5917	0.346191
Q8BUR4	DOCK1	Dedicator of cytokinesis protein 1	-0.0274494	0.592	0.346324
Q91VT4	CBR4	Carbonyl reductase family member 4	0.0352151	0.5922	0.346456
Q06185	ATP5I	ATP synthase subunit e, mitochondrial	0.0223057	0.5923	0.346589
O09159	MA2B1	Lysosomal alpha-mannosidase	-0.0217339	0.5926	0.346721
P68040	GBLP	Guanine nucleotide-binding protein subunit beta-2-like 1	-0.0513715	0.5927	0.346854
Q5NCC3	TRI41	E3 ubiquitin-protein ligase TRIM41	-0.0165397	0.5929	0.346986
P31786	ACBP	Acyl-CoA-binding protein	0.0576251	0.5929	0.347119
Q7TNC4	LC7L2	Putative RNA-binding protein Luc7-like 2	0.0418928	0.593	0.347251
Q9Z129	RECQ1	ATP-dependent DNA helicase Q1	0.0243074	0.5935	0.347383
P29595	NEDD8	NEDD8	0.0306986	0.5936	0.347515
P53810	PIPNA	Phosphatidylinositol transfer protein alpha isoform	-0.0455352	0.5937	0.347648
Q3TC72	FAHD2	Fumarylacetoacetate hydrolase domain-containing protein 2A	0.0399701	0.5942	0.34778
Q91X96	MSS4	Guanine nucleotide exchange factor MSS4	-0.0222513	0.5943	0.347912
Q8BMK4	CKAP4	Cytoskeleton-associated protein 4	-0.0239749	0.5949	0.348044
Q9Z0J0	NPC2	Epididymal secretory protein E1	-0.0516918	0.5949	0.348177
Q9Z2I8	SUCB2	Succinyl-CoA ligase [GDP-forming] subunit beta, mitochondrial	-0.0287345	0.5949	0.348309
Q9CPU0	LGUL	Lactoylglutathione lyase	0.050183	0.595	0.348441
Q61792	LASP1	LIM and SH3 domain protein 1	-0.0546894	0.5953	0.348573
Q9D7G0	PRPS1	Ribose-phosphate pyrophosphokinase 1	-0.0347546	0.5961	0.348705
Q8BIJ6	SYIM	Isoleucyl-tRNA synthetase, mitochondrial	-0.0231593	0.5967	0.348837
Q9D1L9	HBXIP	Hepatitis B virus X-interacting protein homolog	0.0353914	0.5969	0.34897
Q61043	NIN	Ninein	0.037681	0.5971	0.349102
Q9CXE7	TMED5	Transmembrane emp24 domain-containing protein 5	-0.0189792	0.5972	0.349235
Q8C8U0	LIPB1	Liprin-beta-1	0.02626	0.5976	0.349367
P62204	CALM	Calmodulin	-0.0441182	0.5976	0.349499
Q8C6K9	CO6A6	Collagen alpha-6(VI) chain	0.012973	0.5978	0.349631
P23953	ESTN	Liver carboxylesterase N	0.0360607	0.598	0.349764
P61164	ACTZ	Alpha-centractin	0.0265161	0.5985	0.349896
P70202	LXN	Latexin	-0.0338056	0.5987	0.350028
P62073	TIM10	Mitochondrial import inner membrane translocase subunit Tim10	0.0364887	0.5987	0.35016
Q8C838	TUSC5	Tumor suppressor candidate 5 homolog	-0.0180381	0.5989	0.350292
Q9EPC1	PARVA	Alpha-parvin	-0.0500022	0.599	0.350424
P56391	CX6B1	Cytochrome c oxidase subunit 6B1	0.0520018	0.5995	0.350557
Q91XF0	PNPO	Pyridoxine-5'-phosphate oxidase	0.0410516	0.5997	0.350689
P13634	CAH1	Carbonic anhydrase 1	0.0413916	0.5998	0.350821
P07356	ANXA2	Annexin A2	0.0516171	0.5999	0.350953
Q03958	PFD6	Prefoldin subunit 6	0.0315387	0.6009	0.351085
Q6ZWR6	SYNE1	Nesprin-1	-0.0214453	0.6021	0.351218
Q9QYB1	CLIC4	Chloride intracellular channel protein 4	-0.0225711	0.6023	0.351351
Q3URD3	SLMAP	Sarcolemmal membrane-associated protein	0.00843946	0.603	0.351484
Q9D1E6	TBCB	Tubulin-folding cofactor B	-0.00708566	0.603	0.351616
Q9DAS9	GBG12	Guanine nucleotide-binding protein G(I)/G(S)/G(O) subunit gamma-12	0.0241159	0.6032	0.351749
Q8VC85	LSM1	U6 snRNA-associated Sm-like protein LSm1	0.00704372	0.6034	0.351882
Q7TSV4	PGM2	Phosphoglucomutase-2	-0.0179786	0.6042	0.352015
P60670	NPL4	Nuclear protein localization protein 4 homolog	0.00170367	0.6043	0.352148
O55013	TPPC3	Trafficking protein particle complex subunit 3	-0.0352847	0.6047	0.352281
Q9QYR9	ACOT2	Acyl-coenzyme A thioesterase 2, mitochondrial	-0.0448437	0.605	0.352414
Q8BP40	PPA6	Lysophosphatidic acid phosphatase type 6	0.0278334	0.6054	0.352547
Q52KI8	SRRM1	Serine/arginine repetitive matrix protein 1	-0.0268336	0.6061	0.352681
Q02788	CO6A2	Collagen alpha-2(VI) chain	0.0278225	0.6063	0.352814
Q8CBA2	SLFN5	Schlafen family member 5	-0.00661541	0.6064	0.352947
Q9QYR6	MAP1A	Microtubule-associated protein 1A	0.00601983	0.607	0.353081
P04919	B3AT	Band 3 anion transport protein	0.0277941	0.607	0.353214
Q61739	ITA6	Integrin alpha-6	-0.0471978	0.608	0.353348
Q61235	SNTB2	Beta-2-syntrophin	0.000286648	0.6087	0.353482
Q9CYN2	SPCS2	Signal peptidase complex subunit 2	-0.0274078	0.6087	0.353615
P17742	PPIA	Peptidyl-prolyl cis-trans isomerase A	0.0513743	0.609	0.353749
Q8CHT0	AL4A1	Delta-1-pyrroline-5-carboxylate dehydrogenase, mitochondrial	0.0419475	0.6095	0.353883
Q60823	AKT2	RAC-beta serine/threonine-protein kinase	-0.019045	0.6096	0.354017
Q3TL44	NLRX1	NLR family member X1	-0.0316215	0.6097	0.354151
Q3U5Q7	CMPK2	UMP-CMP kinase 2, mitochondrial	0.00436784	0.6106	0.354285
Q99MR8	MCCA	Methylcrotonoyl-CoA carboxylase subunit alpha, mitochondrial	-0.0440415	0.611	0.354419
P54728	RD23B	UV excision repair protein RAD23 homolog B	0.0269673	0.6118	0.354553
Q5NCF2	TPPC1	Trafficking protein particle complex subunit 1	-0.0349809	0.6125	0.354688
Q80X50	UBP2L	Ubiquitin-associated protein 2-like	0.0252697	0.6128	0.354822
Q6PDM2	SRSF1	Serine/arginine-rich splicing factor 1	0.0289153	0.6135	0.354957
O88952	LIN7C	Protein lin-7 homolog C	0.00324354	0.6136	0.355092
Q7TQI3	OTUB1	Ubiquitin thioesterase OTUB1	0.031488	0.6138	0.355227
P35700	PRDX1	Peroxiredoxin-1	-0.0567134	0.6143	0.355362
Q8K411	PREP	Presequence protease, mitochondrial	0.0336898	0.6154	0.355497
O35609	SCAM3	Secretory carrier-associated membrane protein 3	0.0471932	0.6155	0.355632
Q91V41	RAB14	Ras-related protein Rab-14	0.00802107	0.6158	0.355767
Q8R086	SUOX	Sulfite oxidase, mitochondrial	0.0147898	0.6161	0.355903
Q60714	S27A1	Long-chain fatty acid transport protein 1	-0.0329042	0.6162	0.356038
Q9JHL1	NHRF2	Na(+)/H(+) exchange regulatory cofactor NHE-RF2	0.0273106	0.6163	0.356173
P29341	PABP1	Polyadenylate-binding protein 1	0.0421711	0.6163	0.356308
P10493	NID1	Nidogen-1	0.0501172	0.6174	0.356443
Q0GNC1	INF2	Inverted formin-2	-0.00519804	0.618	0.356579
P70122	SBDS	Ribosome maturation protein SBDS	-0.0264129	0.6193	0.356715
P20152	VIME	Vimentin	-0.0430918	0.6197	0.356851
Q8CGB6	TENC1	Tensin-like C1 domain-containing phosphatase	-0.0171829	0.6203	0.356987
Q8BH35	CO8B	Complement component C8 beta chain	0.0154615	0.6205	0.357123
P21981	TGM2	Protein-glutamine gamma-glutamyltransferase 2	0.0148847	0.6206	0.35726
Q91W43	GCSP	Glycine dehydrogenase [decarboxylating], mitochondrial	0.0175854	0.6217	0.357396
Q9CZY3	UB2V1	Ubiquitin-conjugating enzyme E2 variant 1	0.0274656	0.6218	0.357533
Q8CC88	K0564	Uncharacterized protein KIAA0564 homolog	0.0312504	0.6228	0.35767
Q60605	MYL6	Myosin light polypeptide 6	-0.0527442	0.6229	0.357806
Q9EQH3	VPS35	Vacuolar protein sorting-associated protein 35	0.042384	0.6236	0.357943
P99028	QCR6	Cytochrome b-c1 complex subunit 6, mitochondrial	0.0333041	0.6255	0.358081
Q07113	MPRI	Cation-independent mannose-6-phosphate receptor	0.00442459	0.6263	0.358219
Q9CQM5	TXD17	Thioredoxin domain-containing protein 17	-0.0433585	0.6263	0.358357
Q91VD9	NDUS1	NADH-ubiquinone oxidoreductase 75 kDa subunit, mitochondrial	0.0502221	0.6266	0.358495
Q8R146	APEH	Acylamino-acid-releasing enzyme	0.0435937	0.6271	0.358633
Q61151	2A5E	Serine/threonine-protein phosphatase 2A 56 kDa regulatory subunit epsilon isoform	-0.0152065	0.6274	0.358771
Q9CQA1	TPPC5	Trafficking protein particle complex subunit 5	0.020604	0.6279	0.35891
P53811	PIPNB	Phosphatidylinositol transfer protein beta isoform	0.0397509	0.6279	0.359048
Q6PIE5	AT1A2	Sodium/potassium-transporting ATPase subunit alpha-2	0.0480365	0.6283	0.359186
P19783	COX41	Cytochrome c oxidase subunit 4 isoform 1, mitochondrial	0.0490525	0.6285	0.359324
O55239	NNMT	Nicotinamide N-methyltransferase	-0.0166757	0.6288	0.359462
Q9WVJ3	PGCP	Plasma glutamate carboxypeptidase	0.0210343	0.6288	0.3596
Q5SW19	K0664	Protein KIAA0664	-0.0350615	0.6291	0.359738
P59108	CPNE2	Copine-2	0.0399426	0.6296	0.359876
Q8CIM1	LRC45	Leucine-rich repeat-containing protein 45	0.00924107	0.6298	0.360014
Q9QYG0	NDRG2	Protein NDRG2	-0.0276081	0.63	0.360152
P24527	LKHA4	Leukotriene A-4 hydrolase	0.019683	0.6306	0.360291
Q8CIZ8	VWF	von Willebrand factor	-0.00948126	0.6307	0.360429
Q8K387	UBP45	Ubiquitin carboxyl-terminal hydrolase 45	0.0126863	0.6311	0.360567
P09813	APOA2	Apolipoprotein A-II	0.0363703	0.6317	0.360705
Q8VHY0	CSPG4	Chondroitin sulfate proteoglycan 4	0.0256602	0.6322	0.360844
Q8BUV3	GEPH	Gephyrin	0.0115662	0.6323	0.360982
Q3UGR5	HDHD2	Haloacid dehalogenase-like hydrolase domain-containing protein 2	-0.00444971	0.6331	0.361121
Q99JI4	PSMD6	26S proteasome non-ATPase regulatory subunit 6	-0.031012	0.6333	0.361259
P63028	TCTP	Translationally-controlled tumor protein	0.0171315	0.6339	0.361398
P54071	IDHP	Isocitrate dehydrogenase [NADP], mitochondrial	-0.0524759	0.6344	0.361537
P50396	GDIA	Rab GDP dissociation inhibitor alpha	0.0327163	0.6348	0.361676
P80318	TCPG	T-complex protein 1 subunit gamma	-0.0437402	0.6351	0.361815
P62320	SMD3	Small nuclear ribonucleoprotein Sm D3	-0.0223126	0.6357	0.361954
Q569Z6	TR150	Thyroid hormone receptor-associated protein 3	-0.0190027	0.6359	0.362093
Q9D187	MIP18	Mitotic spindle-associated MMXD complex subunit MIP18	0.0164949	0.6366	0.362232
Q3TYD4	ARSG	Arylsulfatase G	0.00213536	0.6366	0.362371
P24472	GSTA4	Glutathione S-transferase A4	0.0303474	0.6369	0.36251
A2AN08	UBR4	E3 ubiquitin-protein ligase UBR4	-0.0121186	0.637	0.362649
P10852	4F2	4F2 cell-surface antigen heavy chain	0.0374947	0.6372	0.362788
O88322	NID2	Nidogen-2	0.0527999	0.6376	0.362927
Q9JM76	ARPC3	Actin-related protein 2/3 complex subunit 3	-0.0327627	0.6383	0.363067
Q8BHP7	OLM2A	Olfactomedin-like protein 2A	0.0154312	0.6384	0.363206
Q99P88	NU155	Nuclear pore complex protein Nup155	-0.0271586	0.6388	0.363345
P26369	U2AF2	Splicing factor U2AF 65 kDa subunit	-0.0205072	0.639	0.363484
O70318	E41L2	Band 4.1-like protein 2	-0.0451741	0.6391	0.363624
P53026	RL10A	60S ribosomal protein L10a	-0.0435516	0.6391	0.363763
Q9D6M3	GHC1	Mitochondrial glutamate carrier 1	-0.0321852	0.6395	0.363902
Q9CYW4	HDHD3	Haloacid dehalogenase-like hydrolase domain-containing protein 3	0.00277654	0.6397	0.364041
Q61035	SYHC	Histidyl-tRNA synthetase, cytoplasmic	-0.0385287	0.6397	0.364179
P55302	AMRP	Alpha-2-macroglobulin receptor-associated protein	-0.0441132	0.6401	0.364318
P14142	GTR4	Solute carrier family 2, facilitated glucose transporter member 4	0.0298187	0.6401	0.364457
Q9JHH6	CBPB2	Carboxypeptidase B2	0.0189849	0.6412	0.364596
Q8BTM8	FLNA	Filamin-A	0.0258272	0.6412	0.364735
Q9WUQ2	PREB	Prolactin regulatory element-binding protein	-0.0245913	0.6424	0.364875
P97429	ANXA4	Annexin A4	-0.0274731	0.6429	0.365015
P68372	TBB2C	Tubulin beta-2C chain	0.0278753	0.6437	0.365155
O08915	AIP	AH receptor-interacting protein	0.00900207	0.644	0.365294
P59999	ARPC4	Actin-related protein 2/3 complex subunit 4	-0.0485695	0.6442	0.365434
Q91WD5	NDUS2	NADH dehydrogenase [ubiquinone] iron-sulfur protein 2, mitochondrial	0.0345245	0.6449	0.365574
O35887	CALU	Calumenin	0.0350665	0.645	0.365714
P62245	RS15A	40S ribosomal protein S15a	-0.0362376	0.6455	0.365855
Q9R0X4	ACOT9	Acyl-coenzyme A thioesterase 9, mitochondrial	0.0240001	0.6465	0.365995
Q9CQ65	MTAP	S-methyl-5'-thioadenosine phosphorylase	-0.0293054	0.6468	0.366135
[truncated: 258 more rows]

## Sheet: Fig1D_ReactomePA_gKO_DE_protein
ID	Description	GeneRatio	BgRatio	pvalue	p.adjust	qvalue	geneID	Count
R-MMU-1430728	Metabolism	55/113	1730/8828	2.54335e-12	1.07329e-09	9.61118e-10	12974/18979/96979/18655/269823/56351/21991/59027/14104/18747/78894/76282/67834/14693/64292/235339/14433/14859/12846/104112/19156/14261/16592/13806/11674/106529/14381/14863/22117/11992/18597/13106/72535/66904/67895/107476/14555/21881/109731/27402/18641/56421/67460/56615/16832/52538/14871/66588/110208/110095/14081/17436/27376/14085/60525	55
R-MMU-8978868	Fatty acid metabolism	13/113	169/8828	2.13182e-07	4.49815e-05	4.02803e-05	18979/96979/269823/56351/14104/64292/104112/106529/66904/107476/67460/52538/14081	13
R-MMU-71406	Pyruvate metabolism and Citric Acid (TCA) cycle	7/113	51/8828	3.39775e-06	0.00047795	0.000427997	12974/67834/235339/18597/27402/16832/17436	7
R-MMU-70263	Gluconeogenesis	6/113	35/8828	4.61742e-06	0.000487138	0.000436225	18655/21991/14433/13806/11674/27376	6
R-MMU-70326	Glucose metabolism	8/113	81/8828	8.31004e-06	0.000701367	0.000628064	18655/21991/14433/13806/11674/18641/56421/27376	8
R-MMU-70171	Glycolysis	7/113	62/8828	1.28545e-05	0.000904103	0.000809611	18655/21991/14433/13806/11674/18641/56421	7
R-MMU-70268	Pyruvate metabolism	5/113	28/8828	2.44286e-05	0.0014727	0.00131878	235339/18597/27402/16832/17436	5
R-MMU-211859	Biological oxidations	11/113	203/8828	5.42811e-05	0.00262857	0.00235384	56351/14859/12846/14261/14863/13106/72535/109731/56615/14871/60525	11
R-MMU-75105	Fatty acyl-CoA biosynthesis	5/113	33/8828	5.60594e-05	0.00262857	0.00235384	14104/104112/106529/107476/14081	5
R-MMU-114608	Platelet degranulation	8/113	115/8828	0.000106593	0.00449822	0.00402809	11818/12258/74145/19156/11674/99571/110135/11537	8
R-MMU-76005	Response to elevated platelet cytosolic Ca2+	8/113	120/8828	0.000143622	0.00506541	0.004536	11818/12258/74145/19156/11674/99571/110135/11537	8
R-MMU-71387	Metabolism of carbohydrates	12/113	266/8828	0.00014404	0.00506541	0.004536	18655/21991/14433/13806/11674/14381/21881/18641/56421/110208/110095/27376	12
R-MMU-6798695	Neutrophil degranulation	17/113	524/8828	0.000335558	0.0108927	0.00975427	96979/11758/13861/20868/72042/19074/19353/104112/19156/13032/16592/11674/15439/11537/18641/56615/110095	17
R-MMU-2162123	Synthesis of Prostaglandins (PG) and Thromboxanes (TX)	3/113	12/8828	0.00041302	0.0124496	0.0111484	96979/56351/64292	3
R-MMU-163685	Integration of energy metabolism	6/113	78/8828	0.000467601	0.0131552	0.0117803	14104/18747/14693/104112/107476/21881	6
R-MMU-556833	Metabolism of lipids	18/113	600/8828	0.000568357	0.0143805	0.0128776	18979/96979/269823/56351/14104/78894/64292/104112/19156/16592/106529/13106/66904/107476/14555/67460/52538/14081	18
R-MMU-156590	Glutathione conjugation	4/113	31/8828	0.000613388	0.0143805	0.0128776	14859/14863/56615/14871	4
R-MMU-3299685	Detoxification of Reactive Oxygen Species	4/113	31/8828	0.000613388	0.0143805	0.0128776	11758/20656/54683/11757	4
R-MMU-2142753	Arachidonic acid metabolism	5/113	57/8828	0.000774878	0.0172104	0.0154117	18979/96979/269823/56351/64292	5
R-MMU-71336	Pentose phosphate pathway	3/113	15/8828	0.000830596	0.0175256	0.0156939	14381/21881/110208	3
R-MMU-76002	Platelet activation, signaling and aggregation	10/113	241/8828	0.00100831	0.0194269	0.0173965	11818/12258/14693/19353/74145/19156/11674/99571/110135/11537	10
R-MMU-204174	Regulation of pyruvate dehydrogenase (PDH) complex	3/113	16/8828	0.00101278	0.0194269	0.0173965	235339/18597/27402	3
R-MMU-140877	Formation of Fibrin Clot (Clotting Cascade)	4/113	36/8828	0.00109322	0.0200581	0.0179618	12258/74145/99571/110135	4
R-MMU-2559584	Formation of Senescence-Associated Heterochromatin Foci (SAHF)	3/113	17/8828	0.00121839	0.0214233	0.0191843	14958/16906/50709	3
R-MMU-168249	Innate Immune System	23/113	928/8828	0.00134998	0.0227877	0.0204061	96979/18747/11758/12258/13861/20868/72042/19074/19353/104112/19156/13032/16592/11674/11964/15439/99571/110135/17913/11537/18641/56615/110095	23
R-MMU-1428517	The citric acid (TCA) cycle and respiratory electron transport	7/113	133/8828	0.00154427	0.0250646	0.022445	12974/67834/235339/18597/27402/16832/17436	7
R-MMU-5362517	Signaling by Retinoic Acid	4/113	42/8828	0.00195851	0.0306108	0.0274115	235339/16592/18597/27402	4
R-MMU-140875	Common Pathway of Fibrin Clot Formation	3/113	21/8828	0.00229589	0.0346024	0.0309859	74145/99571/110135	3
R-MMU-211945	Phase I - Functionalization of compounds	6/113	108/8828	0.00255611	0.0371959	0.0333083	56351/14261/13106/72535/109731/60525	6
R-MMU-2262752	Cellular responses to stress	13/113	431/8828	0.00333679	0.0469375	0.0420319	14958/56351/11758/20656/80888/73442/54683/11757/15270/16906/11964/50709/319178	13
R-MMU-8953897	Cellular responses to external stimuli	13/113	433/8828	0.00347161	0.0472587	0.0423195	14958/56351/11758/20656/80888/73442/54683/11757/15270/16906/11964/50709/319178	13
R-MMU-75153	Apoptotic execution phase	4/113	50/8828	0.00372618	0.049139	0.0440033	14958/16905/16906/50709	4
