# Supplementary material for: Adipocyte NR1D1 dictates adipose tissue expansion during obesity
Source: eLife. 2021 Aug 5;10:e63324. doi: 10.7554/eLife.63324 (PMC8360653; doi:10.7554/eLife.63324)
Supplement: Figure 3—source data 1. [file elife-63324-fig3-data1.xlsx]

## Sheet: Fig3A_edgeR_gKO_DEGs_sigUP
GENEID	SYMBOL
ENSMUSG00000058147	Xlr3c
ENSMUSG00000057465	Saa2
ENSMUSG00000031936	Hephl1
ENSMUSG00000052396	Mogat2
ENSMUSG00000085519	Gm13703
ENSMUSG00000050276	Mrgprg
ENSMUSG00000074115	Saa1
ENSMUSG00000023945	Slc5a7
ENSMUSG00000086546	Gm13709
ENSMUSG00000006764	Tph2
ENSMUSG00000085562	2610028E06Rik
ENSMUSG00000034891	Sncb
ENSMUSG00000070465	Gm9696
ENSMUSG00000002341	Ncan
ENSMUSG00000032808	Cyp2c38
ENSMUSG00000041078	Grid1
ENSMUSG00000076674	Ighv3-8
ENSMUSG00000069300	Hist1h2bj
ENSMUSG00000020059	Sycp3
ENSMUSG00000094433	Igkv5-43
ENSMUSG00000028715	Cyp4a14
ENSMUSG00000001021	S100a3
ENSMUSG00000000730	Dnmt3l
ENSMUSG00000039126	Prune2
ENSMUSG00000047822	Gm6484
ENSMUSG00000032080	Apoa4
ENSMUSG00000047702	Olfr1388
ENSMUSG00000038754	Elovl3
ENSMUSG00000041220	Elovl6
ENSMUSG00000069324	Gm5096
ENSMUSG00000047222	Ear11
ENSMUSG00000068009	Bpifb6
ENSMUSG00000066072	Cyp4a10
ENSMUSG00000090939	Gm17147
ENSMUSG00000031137	Fgf13
ENSMUSG00000026413	Pkp1
ENSMUSG00000012889	Podnl1
ENSMUSG00000076612	Ighg2c
ENSMUSG00000046182	Gsg1l
ENSMUSG00000044378	Slc15a5
ENSMUSG00000038403	Hfe2
ENSMUSG00000090610	Gm3571
ENSMUSG00000060317	Acnat2
ENSMUSG00000028976	Slc2a5
ENSMUSG00000074768	Bhmt
ENSMUSG00000020917	Acly
ENSMUSG00000049313	Sorl1
ENSMUSG00000027605	Acss2
ENSMUSG00000021336	Slc17a4
ENSMUSG00000028240	Cyp7a1
ENSMUSG00000060530	A930017M01Rik
ENSMUSG00000056359	D830013O20Rik
ENSMUSG00000009670	Tex11
ENSMUSG00000026567	Adcy10
ENSMUSG00000018868	Pnpla5
ENSMUSG00000085449	Gm15520
ENSMUSG00000030762	Aqp8
ENSMUSG00000052565	Hist1h1d
ENSMUSG00000095419	Gm14328
ENSMUSG00000027643	Ghrh
ENSMUSG00000061540	Orm2
ENSMUSG00000052516	Robo2
ENSMUSG00000025203	Scd2
ENSMUSG00000074280	Gm6166
ENSMUSG00000060459	Kng2
ENSMUSG00000024600	Slc27a6
ENSMUSG00000056749	Nfil3
ENSMUSG00000070985	Acnat1
ENSMUSG00000063954	Hist2h2aa1
ENSMUSG00000034780	B3galt1
ENSMUSG00000023067	Cdkn1a
ENSMUSG00000053214	Gm9899
ENSMUSG00000032401	Lctl
ENSMUSG00000021702	Thbs4
ENSMUSG00000051596	Otop1
ENSMUSG00000023078	Cxcl13
ENSMUSG00000001420	Tmem79
ENSMUSG00000032418	Me1
ENSMUSG00000030244	Gys2
ENSMUSG00000096966	Gm18336
ENSMUSG00000054757	Akr1c20
ENSMUSG00000055116	Arntl
ENSMUSG00000021789	Sftpa1
ENSMUSG00000026621	Marc1
ENSMUSG00000031204	Asb12
ENSMUSG00000042102	Dmgdh
ENSMUSG00000085912	Trp53cor1
ENSMUSG00000093812	Gm5627
ENSMUSG00000027380	Acoxl
ENSMUSG00000057606	Colq
ENSMUSG00000026062	Slc9a2
ENSMUSG00000038112	AW551984
ENSMUSG00000002992	Apoc2
ENSMUSG00000094090	Gm8494
ENSMUSG00000026073	Il1r2
ENSMUSG00000027533	Fabp5
ENSMUSG00000021255	Esrrb
ENSMUSG00000081058	Hist2h3c2
ENSMUSG00000033105	Lss
ENSMUSG00000045667	Smtnl2
ENSMUSG00000051627	Hist1h1e
ENSMUSG00000020591	Ntsr2
ENSMUSG00000044086	Lmod3
ENSMUSG00000043230	Fam124b
ENSMUSG00000038217	Tlcd2
ENSMUSG00000056413	Adap1
ENSMUSG00000088803	Gm24074
ENSMUSG00000072235	Tuba1a
ENSMUSG00000064343	mt-Tq
ENSMUSG00000042379	Esm1
ENSMUSG00000046794	Ppp1r3b
ENSMUSG00000086460	Gm12236
ENSMUSG00000007594	Hapln4
ENSMUSG00000025185	Loxl4
ENSMUSG00000049265	Kcnk3
ENSMUSG00000086924	Gm11766
ENSMUSG00000021539	Lect2
ENSMUSG00000004098	Col5a3
ENSMUSG00000038793	Lefty1
ENSMUSG00000006784	Ttc25
ENSMUSG00000045620	Odf3l1
ENSMUSG00000045094	Arhgef37
ENSMUSG00000025153	Fasn
ENSMUSG00000032262	Elovl4
ENSMUSG00000051452	Gm11437
ENSMUSG00000074063	Osgin1
ENSMUSG00000042532	Golga7b
ENSMUSG00000085653	Gm15179
ENSMUSG00000018865	Sult4a1
ENSMUSG00000051279	Gdf6
ENSMUSG00000038704	Aspdh
ENSMUSG00000085132	Gm12265
ENSMUSG00000074336	Apoc4
ENSMUSG00000064225	Paqr9
ENSMUSG00000006517	Mvd
ENSMUSG00000029055	Plch2
ENSMUSG00000074652	Myh7b
ENSMUSG00000047246	Hist1h2be
ENSMUSG00000023031	Cela1
ENSMUSG00000007682	Dio2
ENSMUSG00000058454	Dhcr7
ENSMUSG00000020241	Col6a2
ENSMUSG00000045294	Insig1
ENSMUSG00000040907	Atp1a3
ENSMUSG00000098895	RP24-364K9.2
ENSMUSG00000024673	Ms4a1
ENSMUSG00000049122	Frmd3
ENSMUSG00000028024	Enpep
ENSMUSG00000029821	Dfna5
ENSMUSG00000034981	Parm1
ENSMUSG00000039982	Dtx4
ENSMUSG00000086216	Gm13610
ENSMUSG00000061482	Hist1h4d
ENSMUSG00000059751	Rps3a3
ENSMUSG00000018919	Tm4sf5
ENSMUSG00000097440	Gm6277
ENSMUSG00000085721	Gm12796
ENSMUSG00000001119	Col6a1
ENSMUSG00000018983	E2f2
ENSMUSG00000025876	Unc5a
ENSMUSG00000057963	Itpk1
ENSMUSG00000040310	Alx4
ENSMUSG00000025795	Rassf3
ENSMUSG00000031886	Ces2e
ENSMUSG00000037106	Fer1l6
ENSMUSG00000087692	Gm11940
ENSMUSG00000033491	Prss35
ENSMUSG00000031349	Nsdhl
ENSMUSG00000033762	Recql4
ENSMUSG00000056856	Jakmip3
ENSMUSG00000031924	Cyb5b
ENSMUSG00000081600	Gm12286
ENSMUSG00000020532	Acaca
ENSMUSG00000022351	Sqle
ENSMUSG00000021957	Tkt
ENSMUSG00000075511	1700001L05Rik
ENSMUSG00000028020	Glrb
ENSMUSG00000035916	Ptprq
ENSMUSG00000071633	Gm4952
ENSMUSG00000030162	Olr1
ENSMUSG00000040972	Igsf21
ENSMUSG00000037977	6430571L13Rik
ENSMUSG00000058153	Sez6l
ENSMUSG00000025229	Pitx3
ENSMUSG00000036040	Adamtsl2
ENSMUSG00000044254	Pcsk9
ENSMUSG00000040016	Ptger3
ENSMUSG00000071553	Cpa2
ENSMUSG00000031661	Nkd1
ENSMUSG00000055407	Map6
ENSMUSG00000016349	Eef1a2
ENSMUSG00000087612	A230005M16Rik
ENSMUSG00000038665	Dgki
ENSMUSG00000076617	Ighm
ENSMUSG00000090306	Adh6-ps1
ENSMUSG00000063919	Srrm4
ENSMUSG00000020264	Slc36a2
ENSMUSG00000097503	3110045C21Rik
ENSMUSG00000048482	Bdnf
ENSMUSG00000003528	Slc25a1
ENSMUSG00000030878	Cdr2
ENSMUSG00000069270	Hist1h2ac
ENSMUSG00000026077	Npas2
ENSMUSG00000027399	Il1a
ENSMUSG00000020017	Hal
ENSMUSG00000007888	Crlf1
ENSMUSG00000042256	Ptchd4
ENSMUSG00000039470	Zdhhc2
ENSMUSG00000024511	Rab27b
ENSMUSG00000023873	1700010I14Rik
ENSMUSG00000034634	Ly6d
ENSMUSG00000027952	Pmvk
ENSMUSG00000034768	Asb16
ENSMUSG00000024777	Ppp2r5b
ENSMUSG00000002266	Zim1
ENSMUSG00000022546	Gpt
ENSMUSG00000060678	Hist1h4c
ENSMUSG00000032060	Cryab
ENSMUSG00000021175	Cdca7l
ENSMUSG00000028494	Plin2
ENSMUSG00000037493	Cib2
ENSMUSG00000043613	Mmp3
ENSMUSG00000062345	Serpinb2
ENSMUSG00000070392	Gm20634
ENSMUSG00000036913	Trim67
ENSMUSG00000050737	Ptges
ENSMUSG00000032018	Sc5d
ENSMUSG00000028751	Pla2g2e
ENSMUSG00000059434	Gckr
ENSMUSG00000013523	Bcas1
ENSMUSG00000032492	Pth1r
ENSMUSG00000091243	Vgll3
ENSMUSG00000031434	Morc4
ENSMUSG00000083701	Gm4912
ENSMUSG00000039196	Orm1
ENSMUSG00000002058	Unc119
ENSMUSG00000004698	Hdac9
ENSMUSG00000030695	Aldoa
ENSMUSG00000087638	Gm11773
ENSMUSG00000074218	Cox7a1
ENSMUSG00000054247	Gm9939
ENSMUSG00000019874	Fabp7
ENSMUSG00000035834	Polr3g
ENSMUSG00000044916	1700029I15Rik
ENSMUSG00000098234	Snhg6
ENSMUSG00000041695	Kcnj2
ENSMUSG00000063727	Tnfrsf11b
ENSMUSG00000029195	Klb
ENSMUSG00000025937	Lactb2
ENSMUSG00000042978	Sbk1
ENSMUSG00000097139	Gm26626
ENSMUSG00000048782	Insc
ENSMUSG00000001467	Cyp51
ENSMUSG00000038319	Kcnh2
ENSMUSG00000058625	Gm17383
ENSMUSG00000048616	Nog
ENSMUSG00000050751	Pgbd5
ENSMUSG00000024530	Slmo1
ENSMUSG00000000753	Serpinf1
ENSMUSG00000085143	Gm11520
ENSMUSG00000028961	Pgd
ENSMUSG00000021069	Pygl
ENSMUSG00000017724	Etv4
ENSMUSG00000046961	Gpr156
ENSMUSG00000045441	Gprin3
ENSMUSG00000087429	Gm16235
ENSMUSG00000026833	Olfm1
ENSMUSG00000063011	Msln
ENSMUSG00000003410	Elavl3
ENSMUSG00000050663	Trhde
ENSMUSG00000007480	Mc5r
ENSMUSG00000027806	Tsc22d2
ENSMUSG00000067649	Mageb18
ENSMUSG00000000838	Fmr1
ENSMUSG00000036136	Fam110c
ENSMUSG00000028780	Sema3c
ENSMUSG00000026675	Hsd17b7
ENSMUSG00000025854	Fam20c
ENSMUSG00000041642	Kif21b
ENSMUSG00000046415	B430212C06Rik
ENSMUSG00000053897	Slc39a8
ENSMUSG00000069227	Gprin1
ENSMUSG00000034926	Dhcr24
ENSMUSG00000053641	Dennd4a
ENSMUSG00000058672	Tubb2a
ENSMUSG00000093930	Hmgcs1
ENSMUSG00000024776	Stambpl1
ENSMUSG00000024747	Aldh1a7
ENSMUSG00000052825	Gm9892
ENSMUSG00000037613	Tnfrsf23
ENSMUSG00000058258	Idi1
ENSMUSG00000029335	Bmp3
ENSMUSG00000028179	Cth
ENSMUSG00000050860	Phospho1
ENSMUSG00000074213	Gm10642
ENSMUSG00000057666	Gapdh
ENSMUSG00000062093	Gm10110
ENSMUSG00000059743	Fdps
ENSMUSG00000024479	Mal2
ENSMUSG00000002068	Ccne1
ENSMUSG00000049327	Setd8
ENSMUSG00000032294	Pkm
ENSMUSG00000028420	Tmem38b
ENSMUSG00000029712	Actl6b
ENSMUSG00000029059	Fam213b
ENSMUSG00000019990	Pde7b
ENSMUSG00000031708	Tecr
ENSMUSG00000028251	Tstd3
ENSMUSG00000022419	Deptor
ENSMUSG00000089774	Slc5a3
ENSMUSG00000023861	Mpc1
ENSMUSG00000060680	Gm8894
ENSMUSG00000006221	Hspb7
ENSMUSG00000035226	Rims4
ENSMUSG00000026672	Optn
ENSMUSG00000016239	Lonrf3
ENSMUSG00000032902	Slc16a1
ENSMUSG00000022265	Ank
ENSMUSG00000025792	Slc25a10
ENSMUSG00000021699	Pde4d
ENSMUSG00000040966	Slc22a2
ENSMUSG00000022887	Masp1
ENSMUSG00000074971	Fibin
ENSMUSG00000050556	Kcnb1
ENSMUSG00000021196	Pfkp
ENSMUSG00000030409	Dmpk
ENSMUSG00000039826	Trub2
ENSMUSG00000039680	Mrps6
ENSMUSG00000024053	Emilin2
ENSMUSG00000033544	Angptl1
ENSMUSG00000039395	Mreg
ENSMUSG00000055632	Hmcn2
ENSMUSG00000078695	Cisd3
ENSMUSG00000079470	Utp14b
ENSMUSG00000042487	Leo1
ENSMUSG00000021198	Unc79
ENSMUSG00000035686	Thrsp
ENSMUSG00000059248	Sept9
ENSMUSG00000085766	2810430I11Rik
ENSMUSG00000026568	Mpc2
ENSMUSG00000021591	Glrx
ENSMUSG00000028264	Spaca1
ENSMUSG00000032911	Cspg4
ENSMUSG00000039349	C130074G19Rik
ENSMUSG00000050549	5730508B09Rik
ENSMUSG00000059201	Lep
ENSMUSG00000039103	Nexn
ENSMUSG00000025324	Atp10a
ENSMUSG00000029596	Sdsl
ENSMUSG00000027224	Duoxa1
ENSMUSG00000020916	Krt36
ENSMUSG00000046070	Igfals
ENSMUSG00000000326	Comt
ENSMUSG00000023019	Gpd1
ENSMUSG00000079654	Prrt4
ENSMUSG00000091498	Mpc1-ps
ENSMUSG00000051855	Mest
ENSMUSG00000030747	Dgat2
ENSMUSG00000015980	Lrrc27
ENSMUSG00000070572	Trmt112-ps2
ENSMUSG00000026922	Agpat2
ENSMUSG00000073460	Pnldc1
ENSMUSG00000060923	Acyp2
ENSMUSG00000028036	Ptgfr
ENSMUSG00000022707	Gbe1
ENSMUSG00000063696	Gm8730
ENSMUSG00000032193	Ldlr
ENSMUSG00000038375	Trp53inp2
ENSMUSG00000016024	Lbp
ENSMUSG00000058056	Palld
ENSMUSG00000050762	Prss27
ENSMUSG00000040767	Snrnp25
ENSMUSG00000048814	Lonrf2
ENSMUSG00000024990	Rbp4
ENSMUSG00000024799	Tm7sf2
ENSMUSG00000032024	Clmp
ENSMUSG00000063628	Gm7665
ENSMUSG00000023456	Tpi1
ENSMUSG00000040505	Abcg5
ENSMUSG00000097125	Gm26885
ENSMUSG00000057092	Fxyd3
ENSMUSG00000027327	1700037H04Rik
ENSMUSG00000022385	Gtse1
ENSMUSG00000031594	Fgl1
ENSMUSG00000027076	Timm10
ENSMUSG00000002265	Peg3
ENSMUSG00000021748	Pdhb
ENSMUSG00000032883	Acsl3
ENSMUSG00000043424	Eif3j2
ENSMUSG00000038807	Rap1gap2
ENSMUSG00000007891	Ctsd
ENSMUSG00000063524	Eno1
ENSMUSG00000070436	Serpinh1
ENSMUSG00000032459	Mrps22
ENSMUSG00000010797	Wnt2
ENSMUSG00000031400	G6pdx
ENSMUSG00000019942	Cdk1
ENSMUSG00000045679	Pqlc3
ENSMUSG00000023832	Acat2
ENSMUSG00000073802	Cdkn2b
ENSMUSG00000033405	Nudt15
ENSMUSG00000008153	Clstn3
ENSMUSG00000030986	Dhx32
ENSMUSG00000086003	B230206L02Rik
ENSMUSG00000071573	Rnls
ENSMUSG00000008035	Mid1ip1
ENSMUSG00000037686	Aspg
ENSMUSG00000046727	Cystm1
ENSMUSG00000044667	D3Bwg0562e
ENSMUSG00000020277	Pfkl
ENSMUSG00000040711	Sh3pxd2b
ENSMUSG00000027690	Slc2a2
ENSMUSG00000029446	Psph
ENSMUSG00000010936	Vac14
ENSMUSG00000030835	Nomo1
ENSMUSG00000034295	Fhod3
ENSMUSG00000038473	Nos1ap
ENSMUSG00000024736	Tmem132a
ENSMUSG00000028664	Ephb2
ENSMUSG00000087500	Gm12426
ENSMUSG00000049152	Ugt3a2
ENSMUSG00000039195	1110008P14Rik
ENSMUSG00000037010	Apln
ENSMUSG00000001700	Gramd3
ENSMUSG00000079588	Tmem182
ENSMUSG00000031938	4931406C07Rik
ENSMUSG00000025875	Tspan17
ENSMUSG00000032942	Ucp3
ENSMUSG00000043421	Hilpda
ENSMUSG00000001403	Ube2c
ENSMUSG00000032191	Bcl2l10
ENSMUSG00000032688	Malt1
ENSMUSG00000058966	Fam57b
ENSMUSG00000031144	Syp
ENSMUSG00000049086	Bmyc
ENSMUSG00000018102	Hist1h2bc
ENSMUSG00000024177	Nme4
ENSMUSG00000003948	Mmd
ENSMUSG00000055652	Klhl25
ENSMUSG00000032026	Rexo2
ENSMUSG00000063383	Zfp947
ENSMUSG00000015854	Cd5l
ENSMUSG00000036181	Hist1h1c
ENSMUSG00000029430	Ran
ENSMUSG00000027656	Wisp2
ENSMUSG00000027996	Sfrp2
ENSMUSG00000039270	Megf9
ENSMUSG00000049112	Oxtr
ENSMUSG00000069094	Pde7a
ENSMUSG00000031972	Acta1
ENSMUSG00000020649	Rrm2
ENSMUSG00000097487	Ptges3l
ENSMUSG00000028007	Snx7
ENSMUSG00000039428	Tmem135
ENSMUSG00000039683	Sdk1
ENSMUSG00000030353	Tead4
ENSMUSG00000064267	Hvcn1
ENSMUSG00000042254	Cilp
ENSMUSG00000034194	R3hcc1
ENSMUSG00000037366	Pafah2
ENSMUSG00000025375	Aatk
ENSMUSG00000020846	Fam101b
ENSMUSG00000023092	Fhl1
ENSMUSG00000039956	Mrap
ENSMUSG00000048138	Dmrt2
ENSMUSG00000037797	Adh4
ENSMUSG00000033530	Ttc7b
ENSMUSG00000092203	1110038B12Rik
ENSMUSG00000006611	Hfe
ENSMUSG00000030717	Nupr1
ENSMUSG00000032279	Idh3a
ENSMUSG00000045382	Cxcr4
ENSMUSG00000029761	Cald1
ENSMUSG00000020116	Pno1
ENSMUSG00000040852	Plekhh2
ENSMUSG00000027661	Slc2a10
ENSMUSG00000027195	Hsd17b12
ENSMUSG00000026730	Pter
ENSMUSG00000000168	Dlat
ENSMUSG00000029103	Lrpap1
ENSMUSG00000006818	Sod2
ENSMUSG00000020150	Gamt
ENSMUSG00000031790	Mmp15
ENSMUSG00000005470	Asf1b
ENSMUSG00000042041	2010003K11Rik
ENSMUSG00000048924	Ccdc125
ENSMUSG00000039518	Cdsn
ENSMUSG00000028671	Gale
ENSMUSG00000039221	Rpl22l1
ENSMUSG00000004383	Large
ENSMUSG00000048916	Gm5540
ENSMUSG00000001436	Slc19a1
ENSMUSG00000057561	Eif1a
ENSMUSG00000038180	Spag4
ENSMUSG00000036585	Fgf1
ENSMUSG00000054434	Tmem120b
ENSMUSG00000034687	Fras1
ENSMUSG00000024924	Vldlr
ENSMUSG00000041939	Mvk
ENSMUSG00000063229	Ldha
ENSMUSG00000037474	Dtl
ENSMUSG00000032231	Anxa2
ENSMUSG00000045312	Lhfpl2
ENSMUSG00000032113	Chek1
ENSMUSG00000097101	1810034E14Rik
ENSMUSG00000053580	Tanc2
ENSMUSG00000050335	Lgals3
ENSMUSG00000020744	Slc25a19
ENSMUSG00000019883	Echdc1
ENSMUSG00000030123	Plxnd1
ENSMUSG00000019437	Tlcd1
ENSMUSG00000064289	Tank
ENSMUSG00000028339	Col15a1
ENSMUSG00000090523	Gypc
ENSMUSG00000036078	Sigmar1
ENSMUSG00000041852	Tcf20
ENSMUSG00000032892	Rangrf
ENSMUSG00000053746	Ptrh1
ENSMUSG00000037071	Scd1
ENSMUSG00000052248	Gm13476
ENSMUSG00000095362	Gm14325
ENSMUSG00000063684	Gm13910
ENSMUSG00000019302	Atp6v0a1
ENSMUSG00000027222	Pex16
ENSMUSG00000044350	Lacc1
ENSMUSG00000038633	Degs1
ENSMUSG00000025813	Homer2
ENSMUSG00000027111	Itga6
ENSMUSG00000019528	Gyg
ENSMUSG00000034424	Gcsh
ENSMUSG00000056124	B4galt6
ENSMUSG00000038539	Atf5
ENSMUSG00000069793	Slfn9
ENSMUSG00000020788	Atp2a3
ENSMUSG00000031503	Col4a2
ENSMUSG00000022758	P2rx6
ENSMUSG00000035311	Gnptab
ENSMUSG00000005958	Ephb3
ENSMUSG00000063253	Scoc
ENSMUSG00000020660	Pomc
ENSMUSG00000004270	Lpcat3
ENSMUSG00000027217	Tspan18
ENSMUSG00000032112	Trappc4
ENSMUSG00000005233	Spc25
ENSMUSG00000066441	Rdh11
ENSMUSG00000018169	Mfng
ENSMUSG00000051319	1500011K16Rik
ENSMUSG00000039987	Phtf2
ENSMUSG00000024529	Lox
ENSMUSG00000020268	Lyrm7
ENSMUSG00000023885	Thbs2
ENSMUSG00000029238	Clock
ENSMUSG00000021109	Hif1a
ENSMUSG00000023075	Akirin1
ENSMUSG00000087478	4930506C21Rik
ENSMUSG00000033809	Alg3
ENSMUSG00000036330	Slc18a1
ENSMUSG00000026335	Pam
ENSMUSG00000014633	Cmc2
ENSMUSG00000023919	Cenpq
ENSMUSG00000028076	Cd1d1
ENSMUSG00000047528	Als2cr12
ENSMUSG00000021477	Ctsl
ENSMUSG00000035105	Egln3
ENSMUSG00000048007	Timm8a1
ENSMUSG00000031398	Plxna3
ENSMUSG00000031629	Mlf1ip
ENSMUSG00000023988	Bysl
ENSMUSG00000021287	Xrcc3
ENSMUSG00000026701	Prdx6
ENSMUSG00000022636	Alcam
ENSMUSG00000064345	mt-Nd2
ENSMUSG00000024533	Spire1
ENSMUSG00000022324	Matn2
ENSMUSG00000041930	Fam222a
ENSMUSG00000045875	Adra1a
ENSMUSG00000024165	Hn1l
ENSMUSG00000058624	Gda
ENSMUSG00000079555	Haus3
ENSMUSG00000027907	S100a11
ENSMUSG00000006732	Mettl1
ENSMUSG00000002580	Mien1
ENSMUSG00000049999	Ppp1r3d
ENSMUSG00000071078	Nr2c2ap
ENSMUSG00000001056	Nhp2
ENSMUSG00000063694	Cycs
ENSMUSG00000053024	Cntn2
ENSMUSG00000058704	Memo1
ENSMUSG00000034220	Gpc1
ENSMUSG00000038028	9630033F20Rik
ENSMUSG00000046079	Lrrc8d
ENSMUSG00000042429	Adora1
ENSMUSG00000027961	Lrrc39
ENSMUSG00000035049	Rrp12
ENSMUSG00000042709	Atpaf2
ENSMUSG00000021806	Nid2
ENSMUSG00000082674	Gm11914
ENSMUSG00000037060	Prkcdbp
ENSMUSG00000054555	Adam12
ENSMUSG00000019832	Rab32
ENSMUSG00000025019	Lcor
ENSMUSG00000020458	Rtn4
ENSMUSG00000038683	Pak1ip1
ENSMUSG00000028085	Pet112
ENSMUSG00000042251	Pm20d1
ENSMUSG00000004748	Mtfp1
ENSMUSG00000020829	Slc46a1
ENSMUSG00000038550	Gm129
ENSMUSG00000062248	Cks2
ENSMUSG00000049303	Syt12
ENSMUSG00000027983	Cyp2u1
ENSMUSG00000030256	Bhlhe41
ENSMUSG00000020307	Cdc34
ENSMUSG00000036390	Gadd45a
ENSMUSG00000068220	Lgals1
ENSMUSG00000053199	Arhgap20
ENSMUSG00000026608	Kctd3
ENSMUSG00000041135	Ripk2
ENSMUSG00000026005	Rpe
ENSMUSG00000024208	Uqcc2
ENSMUSG00000050552	Lamtor4
ENSMUSG00000001576	Ergic1
ENSMUSG00000074461	Gm10699
ENSMUSG00000030298	Sec13
ENSMUSG00000031570	Ppapdc1b
ENSMUSG00000030609	Aen
ENSMUSG00000021094	Dhrs7
ENSMUSG00000064339	mt-Rnr2
ENSMUSG00000035372	1810055G02Rik
ENSMUSG00000031299	Pdha1
ENSMUSG00000060477	Irak2
ENSMUSG00000038323	1700066M21Rik
ENSMUSG00000024659	Anxa1
ENSMUSG00000026579	F5
ENSMUSG00000022096	Hr
ENSMUSG00000029156	Sgcb
ENSMUSG00000029657	Hsph1
ENSMUSG00000020869	Lrrc59
ENSMUSG00000028212	Ccne2
ENSMUSG00000022474	Pmm1
ENSMUSG00000033107	Rnf125
ENSMUSG00000062070	Pgk1
ENSMUSG00000044231	Nhlrc1
ENSMUSG00000031220	Awat2
ENSMUSG00000056952	Tatdn2
ENSMUSG00000060950	Trmt61a
ENSMUSG00000072082	Ccnf
ENSMUSG00000026154	1110058L19Rik
ENSMUSG00000041390	Mdfic
ENSMUSG00000083626	Gm4459
ENSMUSG00000042444	Fam63b
ENSMUSG00000032332	Col12a1
ENSMUSG00000033715	Akr1c14
ENSMUSG00000024480	Ap3s1
ENSMUSG00000031604	Sc4mol
ENSMUSG00000051950	B3galtl
ENSMUSG00000019814	Ltv1
ENSMUSG00000039640	Mrpl12
ENSMUSG00000030225	Dera
ENSMUSG00000048100	Taf13
ENSMUSG00000082536	Gm13456
ENSMUSG00000010914	Pdhx
ENSMUSG00000044447	Dock5
ENSMUSG00000030615	Tmem126a
ENSMUSG00000042505	Acn9
ENSMUSG00000010376	Nedd8
ENSMUSG00000013833	Med16
ENSMUSG00000047037	Nipa1
ENSMUSG00000073542	Cep76
ENSMUSG00000024732	Ccdc86
ENSMUSG00000024589	Nedd4l
ENSMUSG00000085151	1110018N20Rik
ENSMUSG00000017801	Mlx
ENSMUSG00000050891	Tatdn1
ENSMUSG00000040990	Sh3kbp1
ENSMUSG00000051177	Plcb1
ENSMUSG00000013701	Timm23
ENSMUSG00000018796	Acsl1
ENSMUSG00000078870	Gm14410
ENSMUSG00000016257	Slmo2
ENSMUSG00000012422	Tmem167
ENSMUSG00000038587	Akap12
ENSMUSG00000038174	Fam126b
ENSMUSG00000025759	Mfsd8
ENSMUSG00000026558	Uck2
ENSMUSG00000001506	Col1a1
ENSMUSG00000029575	Mmab
ENSMUSG00000028553	Angptl3
ENSMUSG00000033400	Agl
ENSMUSG00000052852	Reep1
ENSMUSG00000097994	Gm26982
ENSMUSG00000068196	Col8a1
ENSMUSG00000036528	Ppfibp2
ENSMUSG00000074807	Gm10762
ENSMUSG00000073676	Hspe1
ENSMUSG00000042401	Crtac1
ENSMUSG00000028378	Ptgr1
ENSMUSG00000021360	Gcnt2
ENSMUSG00000062937	Mtap
ENSMUSG00000035168	Tanc1
ENSMUSG00000038515	Grtp1
ENSMUSG00000033610	Pank1
ENSMUSG00000028557	Rnf11
ENSMUSG00000078862	Gm14326
ENSMUSG00000079317	Trappc2
ENSMUSG00000025747	Tyms
ENSMUSG00000038412	Higd1a
ENSMUSG00000020326	Ccng1
ENSMUSG00000002808	Epdr1
ENSMUSG00000001707	Eef1e1
ENSMUSG00000020840	Blmh
ENSMUSG00000062580	Timm17a
ENSMUSG00000018362	Kpna2
ENSMUSG00000020029	Nudt4
ENSMUSG00000083563	Gm13340
ENSMUSG00000031864	Ints10
ENSMUSG00000003604	Aven
ENSMUSG00000097413	A830052D11Rik
ENSMUSG00000026189	Pecr
ENSMUSG00000025477	Inpp5a
ENSMUSG00000037278	Tmem97
ENSMUSG00000021951	N6amt2
ENSMUSG00000017692	Rhbdl3
ENSMUSG00000032905	Atg12
ENSMUSG00000053886	Sh2d4a
ENSMUSG00000024892	Pcx
ENSMUSG00000024436	Mrps18b
ENSMUSG00000035198	Tubg1
ENSMUSG00000020864	Ankrd40
ENSMUSG00000073436	Eme2
ENSMUSG00000031628	Casp3
ENSMUSG00000024953	Prdx5
ENSMUSG00000026761	Orc4
ENSMUSG00000024065	Ehd3
ENSMUSG00000001773	Folh1
ENSMUSG00000020695	Mrc2
ENSMUSG00000028121	Bcar3
ENSMUSG00000047182	Irs3
ENSMUSG00000020098	Pcbd1
ENSMUSG00000018740	Slc25a35
ENSMUSG00000027282	Mtch2
ENSMUSG00000024766	Lipo1
ENSMUSG00000004846	Plod3
ENSMUSG00000030842	Lamtor1
ENSMUSG00000022099	Dmtn
ENSMUSG00000024427	Spry4
ENSMUSG00000014226	Cacybp
ENSMUSG00000027099	Mtx2
ENSMUSG00000038510	Rpf2
ENSMUSG00000021365	Nedd9
ENSMUSG00000011257	Pabpc4
ENSMUSG00000097564	C430014B12Rik
ENSMUSG00000037933	Bicd2
ENSMUSG00000020085	Aifm2
ENSMUSG00000025503	Taldo1
ENSMUSG00000045555	Mettl24
ENSMUSG00000041801	Phlda3
ENSMUSG00000087412	Gm15501
ENSMUSG00000079508	Apoo
ENSMUSG00000054452	Aes
ENSMUSG00000048078	Tenm4
ENSMUSG00000041895	Wipi1
ENSMUSG00000040957	Cables1
ENSMUSG00000028690	Mmachc
ENSMUSG00000062376	2010012O05Rik
ENSMUSG00000041161	Otud3
ENSMUSG00000031502	Col4a1
ENSMUSG00000045569	Mc2r
ENSMUSG00000036613	Tssc1
ENSMUSG00000032577	Mapkapk3
ENSMUSG00000027108	Ola1
ENSMUSG00000015668	Pdzd11
ENSMUSG00000041845	Rhod
ENSMUSG00000020664	Dld
ENSMUSG00000060002	Chpt1
ENSMUSG00000044881	Coa4
ENSMUSG00000028261	Ndufaf4
ENSMUSG00000097318	1700007L15Rik
ENSMUSG00000063884	Ptcd3
ENSMUSG00000067719	Gm10221
ENSMUSG00000062825	Actg1
ENSMUSG00000011254	Thg1l
ENSMUSG00000028926	Cdk14
ENSMUSG00000052214	Opa3
ENSMUSG00000030652	Coq7
ENSMUSG00000078861	Zfp931
ENSMUSG00000025092	Hspa12a
ENSMUSG00000059027	9630013D21Rik
ENSMUSG00000026749	Nek6
ENSMUSG00000041958	Pigs
ENSMUSG00000037999	Arap2
ENSMUSG00000052459	Atp6v1a
ENSMUSG00000045917	6330416G13Rik
ENSMUSG00000038527	C1rl
ENSMUSG00000074093	Svip
ENSMUSG00000045980	Tmem104
ENSMUSG00000047757	Fancb
ENSMUSG00000022840	Adcy5
ENSMUSG00000045102	Poln
ENSMUSG00000040370	Lyrm5
ENSMUSG00000022594	Lynx1
ENSMUSG00000042770	Hebp1
ENSMUSG00000014301	Pam16
ENSMUSG00000074457	S100a16
ENSMUSG00000061273	Mmgt1
ENSMUSG00000062933	Gm10123
ENSMUSG00000032860	P2ry2
ENSMUSG00000024030	Abcg1
ENSMUSG00000031767	Nudt7
ENSMUSG00000014856	Tmem208
ENSMUSG00000040111	Gramd1b
ENSMUSG00000052632	Asap2
ENSMUSG00000042688	Mapk6
ENSMUSG00000059447	Hadhb
ENSMUSG00000028458	Tesk1
ENSMUSG00000034158	Lrrc58
ENSMUSG00000040550	Otud6b
ENSMUSG00000026880	Stom
ENSMUSG00000038827	BC026590
ENSMUSG00000009207	Lnp
ENSMUSG00000026385	Dbi
ENSMUSG00000041025	Iffo2
ENSMUSG00000037606	Osbpl5
ENSMUSG00000064341	mt-Nd1
ENSMUSG00000006494	Pdk1
ENSMUSG00000030879	Mrpl17
ENSMUSG00000053581	Zfand2a
ENSMUSG00000068735	Trp53i11
ENSMUSG00000040850	Psme4
ENSMUSG00000028518	Prkaa2
ENSMUSG00000003228	Grk5
ENSMUSG00000031465	Angpt2
ENSMUSG00000023004	Tuba1b
ENSMUSG00000041079	Rwdd2b
ENSMUSG00000020623	Map2k6
ENSMUSG00000022817	Itgb5
ENSMUSG00000042670	Immp1l
ENSMUSG00000058690	Ccser2
ENSMUSG00000054321	Taf4b
ENSMUSG00000020843	Timm22
ENSMUSG00000027236	Eif3j1
ENSMUSG00000002379	Ndufa11
ENSMUSG00000071644	Eef1g
ENSMUSG00000022894	Adamts5
ENSMUSG00000026728	Vim
ENSMUSG00000020377	Ltc4s
ENSMUSG00000006442	Srm
ENSMUSG00000041957	Pkp2
ENSMUSG00000027309	4930402H24Rik
ENSMUSG00000071335	G630090E17Rik
ENSMUSG00000052698	Tln2
ENSMUSG00000025980	Hspd1
ENSMUSG00000037035	Inhbb
ENSMUSG00000063430	Wscd2
ENSMUSG00000045038	Prkce
ENSMUSG00000023156	Rpp14
ENSMUSG00000019054	Fis1
ENSMUSG00000019837	Gtf3c6
ENSMUSG00000000934	Top1mt
ENSMUSG00000035704	Alg8
ENSMUSG00000029009	Mthfr
ENSMUSG00000032615	Nt5m
ENSMUSG00000021814	Anxa7
ENSMUSG00000027230	Creb3l1
ENSMUSG00000060143	Gm10076
ENSMUSG00000022378	Fam49b
ENSMUSG00000064370	mt-Cytb
ENSMUSG00000057147	Dph6
ENSMUSG00000019761	Krt10
ENSMUSG00000026914	Psmd14
ENSMUSG00000024878	Cbwd1
ENSMUSG00000032757	Bet1
ENSMUSG00000034758	Tle6
ENSMUSG00000028648	Ndufs5
ENSMUSG00000045983	Eif4g1
ENSMUSG00000020142	Slc1a4
ENSMUSG00000022206	Npr3
ENSMUSG00000090145	Ugt1a6b
ENSMUSG00000022110	Sucla2
ENSMUSG00000025780	Itih5
ENSMUSG00000025137	Pcyt2
ENSMUSG00000028636	Ppcs
ENSMUSG00000031904	Slc7a6
ENSMUSG00000049038	Mterfd3
ENSMUSG00000085704	4921531C22Rik
ENSMUSG00000025178	Pi4k2a
ENSMUSG00000070305	Mpzl3
ENSMUSG00000022323	Hrsp12
ENSMUSG00000056938	Acbd4
ENSMUSG00000024937	Ehbp1l1
ENSMUSG00000051579	Tceal8
ENSMUSG00000006273	Atp6v1b2
ENSMUSG00000030603	Psmc4
ENSMUSG00000048578	Mlec
ENSMUSG00000044018	Mrpl50
ENSMUSG00000064351	mt-Co1
ENSMUSG00000031799	Tpm4
ENSMUSG00000021116	Eif2s1
ENSMUSG00000026932	Nacc2
ENSMUSG00000025348	Itga7
ENSMUSG00000040562	Gstm2
ENSMUSG00000021967	Mrp63
ENSMUSG00000002017	Fam98a
ENSMUSG00000028402	Mpdz
ENSMUSG00000070476	Fam217b
ENSMUSG00000041548	Hspb8
ENSMUSG00000005683	Cs
ENSMUSG00000019818	Cd164
ENSMUSG00000080893	Gm15920
ENSMUSG00000006638	Abhd1
ENSMUSG00000058833	2810428I15Rik
ENSMUSG00000073131	Vma21
ENSMUSG00000024327	Slc39a7
ENSMUSG00000045629	Sh3tc2
ENSMUSG00000035314	Gdpd5
ENSMUSG00000029767	Calu
ENSMUSG00000006356	Crip2
ENSMUSG00000032640	Chsy1
ENSMUSG00000075467	Dnlz
ENSMUSG00000009614	Sardh
ENSMUSG00000059920	4930453N24Rik
ENSMUSG00000021772	Nkiras1
ENSMUSG00000036352	Ubac1
ENSMUSG00000021281	Tnfaip2
ENSMUSG00000072704	2700089E24Rik
ENSMUSG00000022272	Myo10
ENSMUSG00000068823	Csde1
ENSMUSG00000024782	Ak3
ENSMUSG00000039254	Pomt1
ENSMUSG00000035642	Aamdc
ENSMUSG00000024150	Mcfd2
ENSMUSG00000037601	Nme1
ENSMUSG00000081534	Slc48a1
ENSMUSG00000027746	Ufm1
ENSMUSG00000023915	Tnfrsf21
ENSMUSG00000041696	Rasl12
ENSMUSG00000022404	Slc25a17
ENSMUSG00000021361	Tmem14c
ENSMUSG00000026019	Wdr12
ENSMUSG00000021290	2010107E04Rik
ENSMUSG00000029066	Mrpl20
ENSMUSG00000018415	Gid4
ENSMUSG00000028641	Lepre1
ENSMUSG00000018593	Sparc
ENSMUSG00000020219	Timm13
ENSMUSG00000024538	Ppic
ENSMUSG00000029701	Rbm28
ENSMUSG00000029998	Pcyox1
ENSMUSG00000019797	1700021F05Rik
ENSMUSG00000039197	Adk
ENSMUSG00000020986	Sec23a
ENSMUSG00000067377	Tspan6
ENSMUSG00000024505	Dtwd2
ENSMUSG00000096740	Gm21743
ENSMUSG00000027131	Emc4
ENSMUSG00000007777	0610009B22Rik
ENSMUSG00000032673	Prorsd1
ENSMUSG00000085227	6330418K02Rik
ENSMUSG00000046027	Stard5
ENSMUSG00000048495	Tyw5
ENSMUSG00000079108	Srp54b
ENSMUSG00000031245	Hmgn5
ENSMUSG00000063888	Rpl7l1
ENSMUSG00000053091	Lins
ENSMUSG00000021932	Rnaseh2b
ENSMUSG00000026626	Ppp2r5a
ENSMUSG00000010751	Tnfrsf22
ENSMUSG00000034343	Ube2f
ENSMUSG00000062981	Mrpl42
ENSMUSG00000045160	Bola3
ENSMUSG00000051256	Jagn1
ENSMUSG00000049882	Mettl21d
ENSMUSG00000033793	Atp6v1h
ENSMUSG00000023110	Prmt5
ENSMUSG00000025981	Coq10b
ENSMUSG00000026571	Dcaf6
ENSMUSG00000050666	Vstm4
ENSMUSG00000019863	Qrsl1
ENSMUSG00000030401	Rtn2
ENSMUSG00000014776	Nol3
ENSMUSG00000033933	Vhl
ENSMUSG00000026032	Ndufb3
ENSMUSG00000020955	Ap4s1
ENSMUSG00000041650	Pcca
ENSMUSG00000022757	Tfg
ENSMUSG00000031776	Arl2bp
ENSMUSG00000025868	Higd2a
ENSMUSG00000006699	Cdc42
ENSMUSG00000026889	Rbm18
ENSMUSG00000078812	Eif5a
ENSMUSG00000028247	Coq3
ENSMUSG00000015536	Mocs2
ENSMUSG00000027774	Gfm1
ENSMUSG00000002329	Mdp1
ENSMUSG00000008450	Nutf2
ENSMUSG00000025939	Ube2w
ENSMUSG00000063428	Ddo
ENSMUSG00000026037	Orc2
ENSMUSG00000090553	Snrpe
ENSMUSG00000030407	Qpctl
ENSMUSG00000021203	Otub2
ENSMUSG00000032336	Nptn
ENSMUSG00000058355	Abce1
ENSMUSG00000071866	Ppia
ENSMUSG00000020402	Vdac1
ENSMUSG00000058267	Mrps14
ENSMUSG00000021550	2210016F16Rik
ENSMUSG00000004085	Zak
ENSMUSG00000056899	Immp2l
ENSMUSG00000027312	Atrn
ENSMUSG00000028647	Mycbp
ENSMUSG00000024410	3110002H16Rik
ENSMUSG00000014959	Gorasp2
ENSMUSG00000024404	Riok3
ENSMUSG00000008226	Scrn3
ENSMUSG00000027274	Mkks
ENSMUSG00000029642	Polr1d
ENSMUSG00000060152	Pop5
ENSMUSG00000059708	Akap17b
ENSMUSG00000008393	Carhsp1
ENSMUSG00000021987	Mtmr6
ENSMUSG00000019373	Cops3
ENSMUSG00000033096	Apmap
ENSMUSG00000023345	Poc1a
ENSMUSG00000022557	Bop1
ENSMUSG00000028719	Cmpk1
ENSMUSG00000001525	Tubb5
ENSMUSG00000025499	Hras
ENSMUSG00000052712	BC004004
ENSMUSG00000042814	Mcts2
ENSMUSG00000037458	Azin1
ENSMUSG00000021277	Traf3
ENSMUSG00000021483	Cdk20
ENSMUSG00000002233	Rhoc
ENSMUSG00000030979	Uros
ENSMUSG00000038975	Rabggtb
ENSMUSG00000031521	Aga
ENSMUSG00000024844	Banf1
ENSMUSG00000027944	Hax1
ENSMUSG00000038187	Btbd10
ENSMUSG00000041238	Rbbp8
ENSMUSG00000037206	Islr
ENSMUSG00000026456	Cyb5r1
ENSMUSG00000018585	Atox1
ENSMUSG00000019794	Katna1
ENSMUSG00000023068	Nus1
ENSMUSG00000020553	Pctp
ENSMUSG00000029918	Mrps33
ENSMUSG00000070461	9230112E08Rik
ENSMUSG00000068742	Cry2
ENSMUSG00000028156	Eif4e
ENSMUSG00000085112	A530072M11Rik
ENSMUSG00000074781	Ube2n
ENSMUSG00000038845	Phb
ENSMUSG00000036273	Lrrk2
ENSMUSG00000072640	Lyrm9
ENSMUSG00000011752	Pgam1
ENSMUSG00000034639	Setmar
ENSMUSG00000045438	Cox19
ENSMUSG00000059824	Dbp
ENSMUSG00000000563	Atp5f1
ENSMUSG00000026837	Col5a1
ENSMUSG00000025227	Tmem180
ENSMUSG00000025151	Maged1
ENSMUSG00000029270	Fam69a
ENSMUSG00000027879	Sec22b
ENSMUSG00000020541	Tom1l1
ENSMUSG00000020589	Fam49a
ENSMUSG00000054612	Mgmt
ENSMUSG00000023079	Gtf2ird1
ENSMUSG00000039168	Dap
ENSMUSG00000051169	Rpusd3
ENSMUSG00000033964	Zbtb41
ENSMUSG00000066232	Ipo7
ENSMUSG00000036639	Nudt1
ENSMUSG00000060288	Ppih
ENSMUSG00000004849	Ap1s1
ENSMUSG00000070730	Rmdn3
ENSMUSG00000022035	Ccdc25
ENSMUSG00000038736	Nudcd1
ENSMUSG00000064215	Ifi27
ENSMUSG00000048970	C1galt1c1
ENSMUSG00000097730	Gm26588
ENSMUSG00000028145	Them4
ENSMUSG00000003731	Kpna6
ENSMUSG00000030058	Copg1
ENSMUSG00000038506	Dcun1d2
ENSMUSG00000026519	Tmem63a
ENSMUSG00000022663	Atg3
ENSMUSG00000041926	Rnpep
ENSMUSG00000026615	Eprs
ENSMUSG00000036299	BC031181
ENSMUSG00000042354	Gnl3
ENSMUSG00000005469	Prkaca
ENSMUSG00000026784	Pdss1
ENSMUSG00000023277	Twf2
ENSMUSG00000039246	Lyplal1
ENSMUSG00000071014	Ndufb6
ENSMUSG00000030521	Mphosph10
ENSMUSG00000032513	Gorasp1
ENSMUSG00000016308	Ube2a
ENSMUSG00000026245	Farsb
ENSMUSG00000060206	Zfp462
ENSMUSG00000054312	Mrps21
ENSMUSG00000046949	Nqo2
ENSMUSG00000035595	1600002K03Rik
ENSMUSG00000026399	Cd55
ENSMUSG00000030088	Aldh1l1
ENSMUSG00000046756	Mrps7
ENSMUSG00000015290	Ubl4
ENSMUSG00000014402	Tsg101
ENSMUSG00000050323	Ndufaf6
ENSMUSG00000021242	Npc2
ENSMUSG00000035443	Thyn1
ENSMUSG00000061306	Slc38a10
ENSMUSG00000026999	Nup35
ENSMUSG00000030739	Myh14
ENSMUSG00000039384	Dusp10
ENSMUSG00000038046	Rnmtl1
ENSMUSG00000050043	Tmx2
ENSMUSG00000044709	Gemin7
ENSMUSG00000041378	Cldn5
ENSMUSG00000002797	Ggct
ENSMUSG00000084883	Ccdc85c
ENSMUSG00000024993	Fam45a
ENSMUSG00000045854	Lyrm2
ENSMUSG00000073565	Prr16
ENSMUSG00000031352	Hccs
ENSMUSG00000059278	Lsmd1
ENSMUSG00000021824	Ap3m1
ENSMUSG00000025006	Sorbs1
ENSMUSG00000038160	Atg5
ENSMUSG00000069135	Fgfr1op
ENSMUSG00000054814	Usp46
ENSMUSG00000022892	App
ENSMUSG00000038214	Bend3
ENSMUSG00000039096	Rsad1
ENSMUSG00000029402	Snrnp35
ENSMUSG00000071662	Polr2g
ENSMUSG00000059518	Znhit1
ENSMUSG00000035960	Apex1
ENSMUSG00000027165	B230118H07Rik
ENSMUSG00000031985	Gnpat
ENSMUSG00000036752	Tubb4b
ENSMUSG00000029366	Dck
ENSMUSG00000025764	Phf17
ENSMUSG00000024583	Txnl1
ENSMUSG00000071657	Bscl2
ENSMUSG00000021022	Ppp2r3c
ENSMUSG00000034109	Golim4
ENSMUSG00000024800	Rpp30
ENSMUSG00000021286	Zfyve21
ENSMUSG00000047547	Cltb
ENSMUSG00000026895	Ndufa8
ENSMUSG00000044894	Uqcrq
ENSMUSG00000021929	Kpna3
ENSMUSG00000022205	Sub1
ENSMUSG00000004508	Gab2
ENSMUSG00000020361	Hspa4
ENSMUSG00000029186	Pi4k2b
ENSMUSG00000079658	Tceb1
ENSMUSG00000021930	Spryd7
ENSMUSG00000019864	Rtn4ip1
ENSMUSG00000087687	Pet100
ENSMUSG00000024966	Stip1
ENSMUSG00000006412	Pfdn2
ENSMUSG00000053332	Gas5
ENSMUSG00000028049	Scamp3
ENSMUSG00000037710	Cisd1
ENSMUSG00000027708	Dcun1d1
ENSMUSG00000022193	Psmb5
ENSMUSG00000040883	Tmem205
ENSMUSG00000027166	Dnajc24
ENSMUSG00000056228	Cars2
ENSMUSG00000018677	Slc25a39
ENSMUSG00000026667	Uhmk1
ENSMUSG00000021520	Uqcrb
ENSMUSG00000002297	Dbf4
ENSMUSG00000029500	Pgam5
ENSMUSG00000039515	Ppp2r4
ENSMUSG00000037149	Ddx1
ENSMUSG00000008822	Acyp1
ENSMUSG00000028295	Smim8
ENSMUSG00000039740	Alg2
ENSMUSG00000026623	Lpgat1
ENSMUSG00000046873	Mbtps2
ENSMUSG00000022361	Zhx1
ENSMUSG00000076435	Acsf2
ENSMUSG00000016477	E2f3
ENSMUSG00000041607	Mbp
ENSMUSG00000022905	Kpna1
ENSMUSG00000022105	Rb1
ENSMUSG00000074656	Eif2s2
ENSMUSG00000022503	Nubp1
ENSMUSG00000042759	Apobr
ENSMUSG00000030888	Rrp8
ENSMUSG00000038335	Tsr1
ENSMUSG00000074129	Rpl13a
ENSMUSG00000001542	Ell2
ENSMUSG00000023094	Msrb2
ENSMUSG00000021171	Esyt2
ENSMUSG00000032409	Atr
ENSMUSG00000036698	Ago2
ENSMUSG00000020334	Slc22a4
ENSMUSG00000001435	Col18a1
ENSMUSG00000056999	Ide
ENSMUSG00000019872	Smpdl3a
ENSMUSG00000036985	Zdhhc9
ENSMUSG00000053768	Chchd3
ENSMUSG00000039414	Heatr5b
ENSMUSG00000019210	Atp6v1e1
ENSMUSG00000024359	Hspa9
ENSMUSG00000055900	Tmem69
ENSMUSG00000000441	Raf1
ENSMUSG00000075486	Commd6
ENSMUSG00000024999	Noc3l
ENSMUSG00000062014	Gmfb
ENSMUSG00000025171	Ubtd1
ENSMUSG00000024091	Vapa
ENSMUSG00000015002	Efr3a
ENSMUSG00000027384	Ndufaf5
ENSMUSG00000022724	Mina
ENSMUSG00000030291	Med21
ENSMUSG00000007721	Ccdc124
ENSMUSG00000034345	Gtf2h5
ENSMUSG00000038429	Usp5
ENSMUSG00000001833	Sept7
ENSMUSG00000060450	Rnf14
ENSMUSG00000028158	Mttp
ENSMUSG00000027599	Armc1
ENSMUSG00000022828	Gtf2e1
ENSMUSG00000078713	Tomm5
ENSMUSG00000025532	Crcp
ENSMUSG00000078941	Taf9
ENSMUSG00000001416	Cct3
ENSMUSG00000034088	Hdlbp
ENSMUSG00000028744	Pqlc2
ENSMUSG00000044715	Gskip
ENSMUSG00000032171	Pin1
ENSMUSG00000021877	Arf4
ENSMUSG00000050668	Gpatch11
ENSMUSG00000051238	Swsap1
ENSMUSG00000025940	Tmem70
ENSMUSG00000033855	Ston1
ENSMUSG00000025917	Cops5
ENSMUSG00000021460	Auh
ENSMUSG00000025903	Lypla1
ENSMUSG00000022906	Parp9
ENSMUSG00000002308	Cd320
ENSMUSG00000021737	Psmd6
ENSMUSG00000026511	Srp9
ENSMUSG00000071528	Usmg5
ENSMUSG00000030061	Uba3
ENSMUSG00000024236	Svil
ENSMUSG00000024018	Ccdc167
ENSMUSG00000035354	Uvrag
ENSMUSG00000026500	Cox20
ENSMUSG00000021497	Txndc15
ENSMUSG00000045996	Polr2k
ENSMUSG00000025037	Maoa
ENSMUSG00000053012	Krcc1
ENSMUSG00000025372	Baiap2
ENSMUSG00000034024	Cct2
ENSMUSG00000039512	Uhrf1bp1
ENSMUSG00000060935	AI597468
ENSMUSG00000051934	Spats2
ENSMUSG00000029534	St7
ENSMUSG00000031447	Lamp1
ENSMUSG00000029993	Nfu1
ENSMUSG00000075703	Ept1
ENSMUSG00000024683	Mrpl16
ENSMUSG00000003949	Hlf
ENSMUSG00000036782	Klhl13
ENSMUSG00000028932	Psmc2
ENSMUSG00000033249	Hsf4
ENSMUSG00000018821	Avpi1
ENSMUSG00000021376	Tpmt
ENSMUSG00000022629	Kif21a
ENSMUSG00000036751	Cox6b1
ENSMUSG00000020720	Psmd12
ENSMUSG00000039016	Timm8b
ENSMUSG00000024487	Yipf5
ENSMUSG00000002741	Ykt6
ENSMUSG00000004929	Thop1
ENSMUSG00000029782	Tmem209
ENSMUSG00000016619	Nup50
ENSMUSG00000024146	Cript
ENSMUSG00000030630	Fah
ENSMUSG00000024234	Mtpap
ENSMUSG00000000355	Mcts1
ENSMUSG00000028633	Ctps
ENSMUSG00000035559	Mpv17l2
ENSMUSG00000024759	Atl3
ENSMUSG00000045107	Saysd1
ENSMUSG00000038205	Prkab2
ENSMUSG00000025507	Lrdd
ENSMUSG00000022452	Smdt1
ENSMUSG00000014551	Mrps25
ENSMUSG00000005481	Ddx39
ENSMUSG00000025869	Nop16
ENSMUSG00000070284	Gmppb
ENSMUSG00000024194	Cuta
ENSMUSG00000028383	Hsdl2
ENSMUSG00000028896	Rcc1
ENSMUSG00000031660	Brd7
ENSMUSG00000029762	Akr1b8
ENSMUSG00000062078	Qk
ENSMUSG00000026036	Nif3l1
ENSMUSG00000021615	Xrcc4
ENSMUSG00000027201	Myef2
ENSMUSG00000066026	Dhrs3
ENSMUSG00000026727	Rsu1
ENSMUSG00000028792	Ak2
ENSMUSG00000034327	Kctd9
ENSMUSG00000060419	Rps16-ps2
ENSMUSG00000018931	Gm16515
ENSMUSG00000042632	Pla2g6
ENSMUSG00000060098	Prmt7
ENSMUSG00000025762	Larp1b
ENSMUSG00000028953	Abcf2
ENSMUSG00000028760	Eif4g3
ENSMUSG00000021733	Slc4a7
ENSMUSG00000018858	Ict1
ENSMUSG00000033938	Ndufb7
ENSMUSG00000019996	Map7
ENSMUSG00000021559	Dapk1
ENSMUSG00000026750	Psmb7
ENSMUSG00000047260	Emc6
ENSMUSG00000042660	Wdr55
ENSMUSG00000084957	Bbip1
ENSMUSG00000024158	Hagh
ENSMUSG00000001380	Hars
ENSMUSG00000004897	Hdgf
ENSMUSG00000025950	Idh1
ENSMUSG00000028540	Dph2
ENSMUSG00000021917	Spcs1
ENSMUSG00000025421	Hdhd2
ENSMUSG00000024012	Mtch1
ENSMUSG00000020877	Scrn2
ENSMUSG00000033379	Atp6v0b
ENSMUSG00000035505	Cox18
ENSMUSG00000005397	Nid1
ENSMUSG00000041319	Thoc6
ENSMUSG00000078784	1810022K09Rik
ENSMUSG00000038546	Ranbp9
ENSMUSG00000027286	Lrrc57
ENSMUSG00000039047	Pigk
ENSMUSG00000029017	Pmpcb
ENSMUSG00000037108	Zcwpw1
ENSMUSG00000020019	Ntn4
ENSMUSG00000005354	Txn2
ENSMUSG00000055723	Rras2
ENSMUSG00000025962	Fastkd2
ENSMUSG00000047459	Dynlrb1
ENSMUSG00000025968	Ndufs1
ENSMUSG00000021764	Ndufs4
ENSMUSG00000086290	Snhg12
ENSMUSG00000029580	Actb
ENSMUSG00000039345	Mettl22
ENSMUSG00000037455	Slc18b1
ENSMUSG00000030869	Ndufab1
ENSMUSG00000031176	Dynlt3
ENSMUSG00000017715	Pgs1
ENSMUSG00000021504	B4galt7
ENSMUSG00000097316	Gm10516
ENSMUSG00000028184	Lphn2
ENSMUSG00000027714	Exosc9
ENSMUSG00000060073	Psma3
ENSMUSG00000068039	Tcp1
ENSMUSG00000021496	Pcbd2
ENSMUSG00000002768	Mea1
ENSMUSG00000036977	Anapc10
ENSMUSG00000067194	Eif1ax
ENSMUSG00000032423	Syncrip
ENSMUSG00000027782	Kpna4
ENSMUSG00000001999	Blvra
ENSMUSG00000069808	Fam57a
ENSMUSG00000031960	Aars
ENSMUSG00000050608	Minos1
ENSMUSG00000020952	Scfd1
ENSMUSG00000027259	Adal
ENSMUSG00000021832	Psmc6
ENSMUSG00000035575	Utp6
ENSMUSG00000042208	0610010F05Rik
ENSMUSG00000025616	Usp16
ENSMUSG00000032086	Bace1
ENSMUSG00000033720	Sfxn5
ENSMUSG00000036473	Tbc1d24
ENSMUSG00000023106	Denr
ENSMUSG00000020682	Mmp28
ENSMUSG00000078622	Ccdc47
ENSMUSG00000001774	Chordc1
ENSMUSG00000022255	Mtdh
ENSMUSG00000029610	Aimp2
ENSMUSG00000033222	Ttf2
ENSMUSG00000015733	Capza2
ENSMUSG00000031903	Pla2g15
ENSMUSG00000063235	Ptpmt1
ENSMUSG00000022186	Oxct1
ENSMUSG00000025745	Hadha
ENSMUSG00000026027	Stradb
ENSMUSG00000026755	Arpc5l
ENSMUSG00000020328	Nudcd2
ENSMUSG00000020349	Ppp2ca
ENSMUSG00000019362	D8Ertd738e
ENSMUSG00000000056	Narf
ENSMUSG00000021368	Tbc1d7
ENSMUSG00000041598	Cdc42ep4
ENSMUSG00000028772	Zcchc17
ENSMUSG00000006715	Gmnn
ENSMUSG00000001440	Kpnb1
ENSMUSG00000057388	Mrpl18
ENSMUSG00000048677	Tpcn2
ENSMUSG00000028443	Nudt2
ENSMUSG00000020642	Rnf144a
ENSMUSG00000068240	Gm11808
ENSMUSG00000021339	Mrs2
ENSMUSG00000067925	Cxx1a
ENSMUSG00000027808	Serp1
ENSMUSG00000029185	Fam114a1
ENSMUSG00000022964	Tmem50b
ENSMUSG00000020708	Psmc5
ENSMUSG00000024997	Prdx3
ENSMUSG00000023048	Prr13
ENSMUSG00000032553	Srprb
ENSMUSG00000015176	Nolc1
ENSMUSG00000037072	Sep15
ENSMUSG00000010048	Ifrd2
ENSMUSG00000024414	Mrpl27
ENSMUSG00000030770	Parva
ENSMUSG00000025487	Psmd13
ENSMUSG00000028124	Gclm
ENSMUSG00000032802	Srxn1
ENSMUSG00000097177	9330159M07Rik
ENSMUSG00000050332	Amer1
ENSMUSG00000025894	Aasdhppt
ENSMUSG00000031422	Morf4l2
ENSMUSG00000038497	Tmco3
ENSMUSG00000000184	Ccnd2
ENSMUSG00000027080	Med19
ENSMUSG00000017670	Elmo2
ENSMUSG00000020321	Mdh1
ENSMUSG00000035478	Mbd3
ENSMUSG00000025102	3110040N11Rik
ENSMUSG00000025630	Hprt
ENSMUSG00000002343	Armc6
ENSMUSG00000028763	Hspg2
ENSMUSG00000028127	Abcd3
ENSMUSG00000066150	Slc31a1
ENSMUSG00000079480	Pin4
ENSMUSG00000027712	Anxa5
ENSMUSG00000024601	Isoc1
ENSMUSG00000059796	Eif4a1
ENSMUSG00000028062	Lamtor2
ENSMUSG00000022337	Emc2
ENSMUSG00000036918	Ttc7
ENSMUSG00000038965	Ube2l3
ENSMUSG00000062797	l7Rn6
ENSMUSG00000052906	Ubxn8
ENSMUSG00000002332	Dhrs1
ENSMUSG00000044533	Rps2
ENSMUSG00000063200	Nol7
ENSMUSG00000055943	Emc7
ENSMUSG00000031634	Ufsp2
ENSMUSG00000040269	Mrps28
ENSMUSG00000028318	Polr1e
ENSMUSG00000001134	Uxt
ENSMUSG00000045095	Magi1
ENSMUSG00000027223	Mapk8ip1
ENSMUSG00000083844	2210015D19Rik
ENSMUSG00000020386	Sar1b
ENSMUSG00000022791	Tnk2
ENSMUSG00000038268	Ovca2
ENSMUSG00000029190	D5Ertd579e
ENSMUSG00000032834	Pwp2
ENSMUSG00000019978	Epb4.1l2
ENSMUSG00000028737	Aldh4a1
ENSMUSG00000003038	Hmgn2
ENSMUSG00000011382	Dhdh
ENSMUSG00000022111	Uchl3
ENSMUSG00000028252	Ccnc
ENSMUSG00000028899	Taf12
ENSMUSG00000031781	Ciapin1
ENSMUSG00000041571	Sepw1
ENSMUSG00000047866	Lonp2
ENSMUSG00000031683	Lsm6
ENSMUSG00000021079	Timm9
ENSMUSG00000029319	Coq2
ENSMUSG00000074582	Arfgef2
ENSMUSG00000025512	Chid1
ENSMUSG00000029640	Usp12
ENSMUSG00000039065	Fam173b
ENSMUSG00000053460	Ggcx
ENSMUSG00000076432	Ywhaq
ENSMUSG00000040888	Gfer
ENSMUSG00000030084	Plxna1
ENSMUSG00000028741	Mrto4
ENSMUSG00000021958	Pinx1
ENSMUSG00000001642	Akr1b3
ENSMUSG00000034663	Bmp2k
ENSMUSG00000000804	Usp32
ENSMUSG00000006998	Psmd2
ENSMUSG00000028466	Creb3
ENSMUSG00000063273	Naa15
ENSMUSG00000021548	Ccnh
ENSMUSG00000057469	E2f6
ENSMUSG00000000028	Cdc45
ENSMUSG00000022174	Dad1
ENSMUSG00000026112	Coa5
ENSMUSG00000047648	Fbxo30
ENSMUSG00000020457	Drg1
ENSMUSG00000024120	Lrpprc
ENSMUSG00000021037	Ahsa1
ENSMUSG00000073775	Kti12
ENSMUSG00000032788	Pdxk
ENSMUSG00000005262	Ufd1l
ENSMUSG00000021981	Cab39l
ENSMUSG00000026739	Bmi1
ENSMUSG00000063882	Uqcrh
ENSMUSG00000029649	Pomp
ENSMUSG00000020803	Txndc17
ENSMUSG00000031996	Aplp2
ENSMUSG00000032557	Uba5
ENSMUSG00000057572	Zbtb8os
ENSMUSG00000040242	Fgfr1op2
ENSMUSG00000047368	Abhd17b
ENSMUSG00000020590	Snx13
ENSMUSG00000032458	Copb2
ENSMUSG00000030259	Rassf8
ENSMUSG00000020003	Pex7
ENSMUSG00000056201	Cfl1
ENSMUSG00000090841	Myl6
ENSMUSG00000025066	Sfr1
ENSMUSG00000031617	Tmem184c
ENSMUSG00000067847	Romo1
ENSMUSG00000060224	Pyroxd2
ENSMUSG00000039745	Htatip2
ENSMUSG00000064363	mt-Nd4
ENSMUSG00000037104	Socs5
ENSMUSG00000036975	Tmem177
ENSMUSG00000032397	Tipin
ENSMUSG00000009112	Bcl2l13
ENSMUSG00000022554	Fam203a
ENSMUSG00000026926	Pmpca
ENSMUSG00000030611	Mrps11
ENSMUSG00000038970	Lmtk2
ENSMUSG00000030284	Creld1
ENSMUSG00000024824	Rad9a
ENSMUSG00000044864	Ankrd50
ENSMUSG00000001755	Coasy
ENSMUSG00000042229	Rabif
ENSMUSG00000039959	Hip1
ENSMUSG00000030868	Dctn5
ENSMUSG00000033386	Frrs1
ENSMUSG00000020936	Nmt1
ENSMUSG00000048706	Lurap1l
ENSMUSG00000040018	Cox15
ENSMUSG00000036879	Phkb
ENSMUSG00000021556	Golm1
ENSMUSG00000029403	Cdkl2
ENSMUSG00000038628	Polr3k
ENSMUSG00000009378	Slc16a12
ENSMUSG00000061758	Akr1b10
ENSMUSG00000061244	Exoc5
ENSMUSG00000022257	Laptm4b
ENSMUSG00000032396	Dis3l
ENSMUSG00000037251	Pomk
ENSMUSG00000022698	Naa50
ENSMUSG00000037190	Cyb561d2
ENSMUSG00000020876	Snx11
ENSMUSG00000040521	Tsfm
ENSMUSG00000031816	Mthfsd
ENSMUSG00000030352	Tspan9
ENSMUSG00000000339	Rtca
ENSMUSG00000029198	Grpel1
ENSMUSG00000031848	Lsm4
ENSMUSG00000024587	Nars
ENSMUSG00000024424	Ttc39c
ENSMUSG00000015357	Clpx
ENSMUSG00000027184	Caprin1
ENSMUSG00000036427	Gpi1
ENSMUSG00000041762	Gpr155
ENSMUSG00000031657	Heatr3
ENSMUSG00000021241	Isca2
ENSMUSG00000037111	Setd7
ENSMUSG00000059355	BC056474
ENSMUSG00000038034	Igsf8
ENSMUSG00000055681	Cope
ENSMUSG00000068036	Mllt4
ENSMUSG00000038459	Abhd17c
ENSMUSG00000079478	Sssca1
ENSMUSG00000059534	Uqcr10
ENSMUSG00000014504	Srp19
ENSMUSG00000039497	Dse
ENSMUSG00000032526	Deb1
ENSMUSG00000062691	1110001A16Rik
ENSMUSG00000021418	Rpp40
ENSMUSG00000024896	Minpp1
ENSMUSG00000021711	Trappc13
ENSMUSG00000024778	Fas
ENSMUSG00000020180	Snrpd3
ENSMUSG00000005078	Jkamp
ENSMUSG00000037331	Larp1
ENSMUSG00000032679	Cd59a
ENSMUSG00000026087	Mrpl30
ENSMUSG00000041303	Gtf3c3
ENSMUSG00000022139	Mbnl2
ENSMUSG00000029406	Pitpnm2
ENSMUSG00000021710	Nln
ENSMUSG00000026155	Smap1
ENSMUSG00000038722	Bud31
ENSMUSG00000021786	Oxsm
ENSMUSG00000013698	Pea15a
ENSMUSG00000000301	Pemt
ENSMUSG00000022472	Desi1
ENSMUSG00000021807	2700060E02Rik
ENSMUSG00000022789	Dnm1l
ENSMUSG00000019782	Rwdd1
ENSMUSG00000015289	Lage3
ENSMUSG00000024007	Ppil1
ENSMUSG00000020380	Rad50
ENSMUSG00000061461	Smim20
ENSMUSG00000042148	Cox10
ENSMUSG00000034714	Ttyh2
ENSMUSG00000007338	Mrpl49
ENSMUSG00000005674	Tomm40l
ENSMUSG00000021282	Eif5
ENSMUSG00000022295	Atp6v1c1
ENSMUSG00000018761	Mpdu1
ENSMUSG00000008090	Fgfrl1
ENSMUSG00000026820	Ptges2
ENSMUSG00000048439	Nupl2
ENSMUSG00000034192	Lsm3
ENSMUSG00000001175	Calm1
ENSMUSG00000061458	Nol10
ENSMUSG00000040822	1700123O20Rik
ENSMUSG00000096199	Ptrhd1
ENSMUSG00000021033	Gstz1
ENSMUSG00000060802	B2m
ENSMUSG00000024048	Myl12a
ENSMUSG00000022241	Tars
ENSMUSG00000055128	Cgrrf1
ENSMUSG00000042426	Dhx29
ENSMUSG00000032386	Trip4
ENSMUSG00000024381	Bin1
ENSMUSG00000019731	Slc35e1
ENSMUSG00000063760	Rnf217
ENSMUSG00000051232	Tmem199
ENSMUSG00000025979	Mob4
ENSMUSG00000028990	Lzic
ENSMUSG00000047879	Usp14
ENSMUSG00000001630	Stk38l
ENSMUSG00000051223	Bzw1
ENSMUSG00000020198	Ap3d1
ENSMUSG00000025933	Tmem14a
ENSMUSG00000042787	Exog
ENSMUSG00000020483	Dynll2
ENSMUSG00000033099	Nol12
ENSMUSG00000005161	Prdx2
ENSMUSG00000006315	Tmem147
ENSMUSG00000011884	Gltp
ENSMUSG00000021890	Eaf1
ENSMUSG00000026509	Capn2
ENSMUSG00000028779	Pef1
ENSMUSG00000029623	Pdap1
ENSMUSG00000019579	D17Wsu104e
ENSMUSG00000033209	Ttc28
ENSMUSG00000052962	Mrpl35
ENSMUSG00000029447	Cct6a
ENSMUSG00000036850	Mrpl41
ENSMUSG00000026356	Dars
ENSMUSG00000075704	Txnrd2
ENSMUSG00000027787	Nmd3
ENSMUSG00000030595	Nfkbib
ENSMUSG00000005610	Eif4g2
ENSMUSG00000022965	Ifngr2
ENSMUSG00000039703	Nploc4
ENSMUSG00000024378	Stard4
ENSMUSG00000002319	Ipo4
ENSMUSG00000017664	Slc35c2
ENSMUSG00000025728	Pigq
ENSMUSG00000022820	Ndufb4
ENSMUSG00000051234	Rnf7
ENSMUSG00000024259	Slc25a46
ENSMUSG00000040351	Ankib1
ENSMUSG00000024507	Hsd17b4
ENSMUSG00000001521	Tulp3
ENSMUSG00000015944	Gatsl2
ENSMUSG00000050565	Tor1aip2
ENSMUSG00000032803	Cdv3
ENSMUSG00000018334	Ksr1
ENSMUSG00000033157	Abhd10
ENSMUSG00000024360	Etf1
ENSMUSG00000037752	Xkr8
ENSMUSG00000024143	Rhoq
ENSMUSG00000031723	Txnl4b
ENSMUSG00000026753	Ppp6c
ENSMUSG00000047731	Wbp1l
ENSMUSG00000041949	Tango6
ENSMUSG00000078584	AU022252
ENSMUSG00000033184	Tmed7
ENSMUSG00000034617	Mtrr
ENSMUSG00000033352	Map2k4
ENSMUSG00000022551	Cyc1
ENSMUSG00000022957	Itsn1
ENSMUSG00000020149	Rab1
ENSMUSG00000024805	Pcgf5
ENSMUSG00000033953	Ppp3r1
ENSMUSG00000070699	Sars2
ENSMUSG00000020817	Rabep1
ENSMUSG00000036371	Serbp1
ENSMUSG00000042705	Commd10
ENSMUSG00000060260	Pwwp2b
ENSMUSG00000020544	Cox11
ENSMUSG00000024726	2410127L17Rik
ENSMUSG00000032180	Tmed1
ENSMUSG00000020022	Ndufa12
ENSMUSG00000028607	Cpt2
ENSMUSG00000004356	Utp20
ENSMUSG00000032398	Snapc5
ENSMUSG00000020075	Ddx21
ENSMUSG00000022792	Yars2
ENSMUSG00000044795	Cyb5d1
ENSMUSG00000054455	Vapb
ENSMUSG00000066235	Pomgnt2
ENSMUSG00000031226	Pbdc1
ENSMUSG00000053317	Sec61b
ENSMUSG00000015092	Edf1
ENSMUSG00000007415	Gatad1
ENSMUSG00000004530	Coro1c
ENSMUSG00000018189	Uchl5
ENSMUSG00000036599	Chst12
ENSMUSG00000062203	Gspt1
ENSMUSG00000032412	Atp1b3
ENSMUSG00000006262	Mob1b
ENSMUSG00000066979	Bub3
ENSMUSG00000028345	Tex10
ENSMUSG00000032435	Dync1li1
ENSMUSG00000029681	Bcl7b
ENSMUSG00000024187	Itfg3
ENSMUSG00000015747	Vps45
ENSMUSG00000015671	Psma2
ENSMUSG00000051154	Commd3
ENSMUSG00000003810	Mast2
ENSMUSG00000029073	Gltpd1
ENSMUSG00000030127	Cops7a
ENSMUSG00000005043	Sgsh
ENSMUSG00000005813	Metap1
ENSMUSG00000060904	Arl1
ENSMUSG00000019179	Mdh2
ENSMUSG00000044627	Swi5
ENSMUSG00000055239	Kcmf1
ENSMUSG00000022956	Atp5o
ENSMUSG00000022856	Tmem41a
ENSMUSG00000036632	Alg5
ENSMUSG00000023944	Hsp90ab1
ENSMUSG00000032330	Cox7a2
ENSMUSG00000025995	Wdr75
ENSMUSG00000027835	Pdcd10
ENSMUSG00000024104	Fam21
ENSMUSG00000034201	Gas2l1
ENSMUSG00000033068	Entpd6
ENSMUSG00000016344	Ppdpf
ENSMUSG00000020561	Twistnb
ENSMUSG00000055334	Snupn
ENSMUSG00000063179	Pstk
ENSMUSG00000025586	Cpeb1
ENSMUSG00000032547	Ryk
ENSMUSG00000023030	Slc11a2
ENSMUSG00000028433	Ubap2
ENSMUSG00000000088	Cox5a
ENSMUSG00000031600	Vps37a
ENSMUSG00000018068	Ints2
ENSMUSG00000037461	Ints7
ENSMUSG00000030894	Tpp1
ENSMUSG00000049299	Trappc1
ENSMUSG00000022391	Rangap1
ENSMUSG00000061904	Slc25a3
ENSMUSG00000059734	Ndufs8
ENSMUSG00000060992	Copz1
ENSMUSG00000017778	Cox7c
ENSMUSG00000022471	Xrcc6
ENSMUSG00000052456	Asna1
ENSMUSG00000030980	Knop1
ENSMUSG00000031429	Psmd10
ENSMUSG00000005625	Psmd4
ENSMUSG00000028223	Decr1
ENSMUSG00000038388	Mpp6
ENSMUSG00000042590	Ipo11
ENSMUSG00000029213	Commd8
ENSMUSG00000078974	Sec61g
ENSMUSG00000031585	Gtf2e2
ENSMUSG00000022500	Litaf
ENSMUSG00000001123	Lgals9
ENSMUSG00000008859	Rala
ENSMUSG00000033845	Mrpl15
ENSMUSG00000064105	Cnnm2
ENSMUSG00000001424	Snd1
ENSMUSG00000029763	Exoc4
ENSMUSG00000035772	Mrps2
ENSMUSG00000036120	Rfxank
ENSMUSG00000005417	Mprip
ENSMUSG00000031168	Ebp
ENSMUSG00000034390	Cmip
ENSMUSG00000027809	Etfdh
ENSMUSG00000019763	Rmnd1
ENSMUSG00000045435	Tmem60
ENSMUSG00000026617	Bpnt1
ENSMUSG00000028461	Ccdc107
ENSMUSG00000036503	Rnf13
ENSMUSG00000019857	Asf1a
ENSMUSG00000033499	Larp4b
ENSMUSG00000028568	Btf3l4
ENSMUSG00000018770	Atp5g3
ENSMUSG00000034157	2310044G17Rik
ENSMUSG00000017686	Rhot1
ENSMUSG00000041740	Rnf10
ENSMUSG00000027002	Nckap1
ENSMUSG00000021076	Actr10
ENSMUSG00000020946	Gosr2
ENSMUSG00000038206	Fbxo8
ENSMUSG00000098332	RP24-176F12.8
ENSMUSG00000045410	Akr1e1
ENSMUSG00000062929	Cfl2
ENSMUSG00000007656	Arpp19
ENSMUSG00000020873	Slc35b1
ENSMUSG00000058799	Nap1l1
ENSMUSG00000028426	Rad23b
ENSMUSG00000021276	Cinp
ENSMUSG00000028683	Eif2b3
ENSMUSG00000027680	Fxr1
ENSMUSG00000028955	Vamp3
ENSMUSG00000009030	Pdcl
ENSMUSG00000022283	Pabpc1
ENSMUSG00000050199	Lgr4
ENSMUSG00000032518	Rpsa
ENSMUSG00000039105	Atp6v1g1
ENSMUSG00000067722	BC003965
ENSMUSG00000032437	Stt3b
ENSMUSG00000022370	Mrpl13
ENSMUSG00000015575	Atp6v0e
ENSMUSG00000021149	Gtpbp4
ENSMUSG00000042719	Naa25
ENSMUSG00000010755	Cars
ENSMUSG00000051346	Spryd4
ENSMUSG00000014077	Chp1
ENSMUSG00000032199	Polr2m
ENSMUSG00000029364	Wsb2
ENSMUSG00000020390	Ube2b
ENSMUSG00000029840	Mtpn
ENSMUSG00000049760	2410015M20Rik
ENSMUSG00000026393	Nek7
ENSMUSG00000054484	Tmem62
ENSMUSG00000028745	Capzb
ENSMUSG00000028478	Clta
ENSMUSG00000021114	Atp6v1d
ENSMUSG00000026074	Map4k4
ENSMUSG00000026305	Lrrfip1
ENSMUSG00000070044	Fam149a
ENSMUSG00000031568	Rwdd4a
ENSMUSG00000053390	Zfp952
ENSMUSG00000063873	Slc24a3
ENSMUSG00000027803	Wwtr1
ENSMUSG00000003559	As3mt
ENSMUSG00000074698	Csnk2a1
ENSMUSG00000028538	St3gal3
ENSMUSG00000009549	Srp14
ENSMUSG00000025228	Actr1a
ENSMUSG00000023723	Mrps23
ENSMUSG00000072946	Ptgr2
ENSMUSG00000023953	Polh
ENSMUSG00000068040	Tm9sf4
ENSMUSG00000039183	Nubp2
ENSMUSG00000035325	Sec31a
ENSMUSG00000025538	Sumf2
ENSMUSG00000002102	Psmc3
ENSMUSG00000024191	Bnip1
ENSMUSG00000032966	Fkbp1a
ENSMUSG00000040263	Klhdc4
ENSMUSG00000026869	Psmd5
ENSMUSG00000040560	Wdr7
ENSMUSG00000034729	Mrps10
ENSMUSG00000053799	Exoc6
ENSMUSG00000026181	Ppm1f
ENSMUSG00000037152	Ndufc1
ENSMUSG00000026377	Mki67ip
ENSMUSG00000005882	Uqcc1
ENSMUSG00000030105	Arl8b
ENSMUSG00000027429	Sec23b
ENSMUSG00000091537	Tma7
ENSMUSG00000070372	Capza1
ENSMUSG00000036932	Aifm1
ENSMUSG00000031696	Vps35
ENSMUSG00000040410	Fbxl4
ENSMUSG00000030059	Tmf1
ENSMUSG00000002881	Nab1
ENSMUSG00000028330	Ncbp1
ENSMUSG00000038482	Tfdp1
ENSMUSG00000036087	Slain2
ENSMUSG00000044573	Acp1
ENSMUSG00000052428	Tmco1
ENSMUSG00000030042	Pole4
ENSMUSG00000022634	Yaf2
ENSMUSG00000020956	Dtd2
ENSMUSG00000026192	Atic
ENSMUSG00000030533	Unc45a
ENSMUSG00000058076	Sdhc
ENSMUSG00000024346	Pfdn1
ENSMUSG00000033488	BC026585
ENSMUSG00000028284	Map3k7
ENSMUSG00000036309	Skp1a
ENSMUSG00000043067	Dpy19l1
ENSMUSG00000047989	Ino80c
ENSMUSG00000030286	Emc3
ENSMUSG00000028577	Plaa
ENSMUSG00000057841	Rpl32
ENSMUSG00000061650	Med9
ENSMUSG00000024695	Zfp91
ENSMUSG00000052337	Immt
ENSMUSG00000029152	Ociad1
ENSMUSG00000021693	Kif2a
ENSMUSG00000041438	Cirh1a
ENSMUSG00000000776	Polr3d
ENSMUSG00000007564	Ppp2r1a
ENSMUSG00000050705	2310061I04Rik
ENSMUSG00000004798	Ulk2
ENSMUSG00000016757	Ttll12
ENSMUSG00000032096	Arcn1
ENSMUSG00000005299	Letm1
ENSMUSG00000030057	Cnbp
ENSMUSG00000039988	Ankrd13c
ENSMUSG00000003662	Ciao1
ENSMUSG00000068921	Dap3
ENSMUSG00000036112	Metap2
ENSMUSG00000075419	Dolk
ENSMUSG00000028696	Ipp
ENSMUSG00000062866	Phactr2
ENSMUSG00000029203	Ube2k
ENSMUSG00000036983	Tfb1m
ENSMUSG00000047554	Tmem41b
ENSMUSG00000017188	Coa3
ENSMUSG00000021486	Prelid1
ENSMUSG00000028029	Aimp1
ENSMUSG00000056770	Setd3
ENSMUSG00000043885	Slc36a4
ENSMUSG00000029535	Triap1
ENSMUSG00000059456	Ptk2b
ENSMUSG00000001445	Mrpl10
ENSMUSG00000018848	Rars
ENSMUSG00000031357	Syap1
ENSMUSG00000025817	Nudt5
ENSMUSG00000037720	Tmem33
ENSMUSG00000035517	Tdrd7
ENSMUSG00000031703	Itfg1
ENSMUSG00000042790	Rnf214
ENSMUSG00000051065	Mb21d2
ENSMUSG00000004221	Ikbkg
ENSMUSG00000027679	Dnajc19
ENSMUSG00000002846	Timmdc1
ENSMUSG00000001924	Uba1
ENSMUSG00000026172	Bcs1l
ENSMUSG00000032667	Pon2
ENSMUSG00000071649	B3gat3
ENSMUSG00000004945	Tmem242
ENSMUSG00000040688	Tbl3
ENSMUSG00000042305	Tmem183a
ENSMUSG00000024725	Ostf1
ENSMUSG00000032872	Cyb5r4
ENSMUSG00000025374	Nabp2
ENSMUSG00000071176	Arhgef10
ENSMUSG00000024099	Ndufv2
ENSMUSG00000025240	Sacm1l
ENSMUSG00000058407	Txndc9
ENSMUSG00000021178	Psmc1
ENSMUSG00000012405	Rpl15
ENSMUSG00000001983	Taco1
ENSMUSG00000029175	Slc35f6
ENSMUSG00000028837	Psmb2
ENSMUSG00000063275	Ptpla
ENSMUSG00000025967	Eef1b2
ENSMUSG00000025428	Atp5a1
ENSMUSG00000032194	Kank2
ENSMUSG00000074247	Dda1
ENSMUSG00000041629	Fam104a
ENSMUSG00000028668	Tceb3
ENSMUSG00000017747	Ghdc
ENSMUSG00000029407	Uso1
ENSMUSG00000031701	Dnaja2
ENSMUSG00000028048	Gba
ENSMUSG00000027968	Larp7
ENSMUSG00000006392	Med8
ENSMUSG00000017837	Nkiras2
ENSMUSG00000030662	Ipo5
ENSMUSG00000026150	Mff
ENSMUSG00000022635	Zcrb1
ENSMUSG00000079020	Slc45a4
ENSMUSG00000056121	Fez2
ENSMUSG00000025613	Cct8
ENSMUSG00000027472	Pdrg1
[truncated: 578 more rows]

## Sheet: Fig3A_edgeR_gKO_DEGs_sigDOWN
GENEID	SYMBOL
ENSMUSG00000032315	Cyp1a1
ENSMUSG00000025528	2010106E10Rik
ENSMUSG00000028785	Hpca
ENSMUSG00000050069	Grem2
ENSMUSG00000076586	Igkv8-21
ENSMUSG00000036449	Lcn8
ENSMUSG00000096490	Igkv10-94
ENSMUSG00000026227	2810459M11Rik
ENSMUSG00000052974	Cyp2f2
ENSMUSG00000066364	Serpina3b
ENSMUSG00000067599	Klra7
ENSMUSG00000061780	Cfd
ENSMUSG00000070369	Itgad
ENSMUSG00000022762	Ncam2
ENSMUSG00000022039	Adam2
ENSMUSG00000085081	A430071A18Rik
ENSMUSG00000061099	Gapdhs
ENSMUSG00000026415	Fcamr
ENSMUSG00000021062	Rab15
ENSMUSG00000086868	Gm15883
ENSMUSG00000046378	Asphd1
ENSMUSG00000033006	Sox10
ENSMUSG00000001334	Fndc5
ENSMUSG00000091510	Mtag2
ENSMUSG00000077990	Gm23134
ENSMUSG00000030968	Pdilt
ENSMUSG00000082902	Ccl19-ps1
ENSMUSG00000038357	Camp
ENSMUSG00000022715	Cldn26
ENSMUSG00000042708	Shcbp1l
ENSMUSG00000048442	Smim5
ENSMUSG00000056812	St8sia3
ENSMUSG00000024842	Cabp4
ENSMUSG00000057729	Prtn3
ENSMUSG00000085180	AI838599
ENSMUSG00000032796	Lama1
ENSMUSG00000029304	Spp1
ENSMUSG00000030693	Klk10
ENSMUSG00000030077	Chl1
ENSMUSG00000079013	Serpina3j
ENSMUSG00000025479	Cyp2e1
ENSMUSG00000040035	Disp2
ENSMUSG00000032356	Rasgrf1
ENSMUSG00000045392	Olfr1033
ENSMUSG00000075270	Pde11a
ENSMUSG00000065922	n-R5-8s1
ENSMUSG00000020723	Cacng4
ENSMUSG00000022309	Angpt1
ENSMUSG00000038077	Kcna6
ENSMUSG00000021095	Gsc
ENSMUSG00000091575	2010016I18Rik
ENSMUSG00000022494	Shisa9
ENSMUSG00000026344	Lypd1
ENSMUSG00000033615	Cplx1
ENSMUSG00000029272	Sult1e1
ENSMUSG00000049410	Zfp683
ENSMUSG00000046215	Rprml
ENSMUSG00000045573	Penk
ENSMUSG00000092021	Gbp11
ENSMUSG00000015476	Prrt1
ENSMUSG00000043165	Lor
ENSMUSG00000097249	Gm26889
ENSMUSG00000044716	Dok7
ENSMUSG00000003477	Inmt
ENSMUSG00000024041	Cryaa
ENSMUSG00000009093	Gstt4
ENSMUSG00000050241	Klre1
ENSMUSG00000042846	Lrrtm3
ENSMUSG00000014609	Chrne
ENSMUSG00000091345	Col6a5
ENSMUSG00000024366	Gfra3
ENSMUSG00000043463	Rab9b
ENSMUSG00000030935	Acsm3
ENSMUSG00000059430	Actg2
ENSMUSG00000085382	Gm13861
ENSMUSG00000031891	Hsd11b2
ENSMUSG00000075023	Accsl
ENSMUSG00000065037	Rn7sk
ENSMUSG00000036198	Arhgap36
ENSMUSG00000059921	Unc5c
ENSMUSG00000090084	Srpx
ENSMUSG00000005251	Ripk4
ENSMUSG00000038583	Pln
ENSMUSG00000070570	Slc17a7
ENSMUSG00000039037	St6galnac5
ENSMUSG00000056399	Prss34
ENSMUSG00000086233	Gm11816
ENSMUSG00000020889	Nr1d1
ENSMUSG00000046159	Chrm3
ENSMUSG00000049409	Prokr1
ENSMUSG00000047502	Mroh7
ENSMUSG00000036095	Dgkb
ENSMUSG00000030972	Acsm5
ENSMUSG00000021943	Gdf10
ENSMUSG00000079105	C7
ENSMUSG00000037709	Fam13a
ENSMUSG00000024593	Megf10
ENSMUSG00000025163	Cd7
ENSMUSG00000001349	Cnn1
ENSMUSG00000055368	Slc6a2
ENSMUSG00000025723	Nmb
ENSMUSG00000003153	Slc2a3
ENSMUSG00000019880	Rspo3
ENSMUSG00000055972	2810407A14Rik
ENSMUSG00000095079	Igha
ENSMUSG00000030325	Klrb1c
ENSMUSG00000054423	Cadps
ENSMUSG00000024371	C2
ENSMUSG00000021314	Amph
ENSMUSG00000084969	Gm11205
ENSMUSG00000029370	Rassf6
ENSMUSG00000041202	Pla2g2d
ENSMUSG00000043719	Col6a6
ENSMUSG00000049939	Lrrc4
ENSMUSG00000040441	Slc26a10
ENSMUSG00000067786	Nnat
ENSMUSG00000079014	Serpina3i
ENSMUSG00000045288	Ush1g
ENSMUSG00000033825	Tpsb2
ENSMUSG00000060311	Mucl1
ENSMUSG00000032841	Prr5l
ENSMUSG00000072625	Gdf2
ENSMUSG00000052629	Gm9885
ENSMUSG00000032327	Stra6
ENSMUSG00000024173	Tpsab1
ENSMUSG00000044320	1700001O22Rik
ENSMUSG00000056133	Gm9992
ENSMUSG00000040724	Kcna2
ENSMUSG00000046338	Gpat2
ENSMUSG00000085069	Gm13111
ENSMUSG00000085113	B130011K05Rik
ENSMUSG00000062329	Cytl1
ENSMUSG00000068227	Il2rb
ENSMUSG00000090500	Gm17057
ENSMUSG00000089783	Gm454
ENSMUSG00000020010	Vnn3
ENSMUSG00000031963	Bmper
ENSMUSG00000031725	Ces1f
ENSMUSG00000045259	Klhdc9
ENSMUSG00000009097	Tbx1
ENSMUSG00000030098	Grip2
ENSMUSG00000045733	Sprn
ENSMUSG00000026387	Sctr
ENSMUSG00000087660	B230398E01Rik
ENSMUSG00000026768	Itga8
ENSMUSG00000031613	Hpgd
ENSMUSG00000030737	Slco2b1
ENSMUSG00000044986	Tst
ENSMUSG00000061068	Mcpt4
ENSMUSG00000075576	Gm12359
ENSMUSG00000020787	P2rx1
ENSMUSG00000006457	Actn3
ENSMUSG00000037202	Prf1
ENSMUSG00000046607	Hrk
ENSMUSG00000028133	Rwdd3
ENSMUSG00000039883	Lrrc17
ENSMUSG00000086454	4930500J02Rik
ENSMUSG00000041216	Clvs1
ENSMUSG00000079017	Ifi27l2a
ENSMUSG00000092353	Gm20539
ENSMUSG00000030428	Ttyh1
ENSMUSG00000034762	Glis1
ENSMUSG00000038239	Hrc
ENSMUSG00000028444	Cntfr
ENSMUSG00000004328	Hif3a
ENSMUSG00000000223	Drp2
ENSMUSG00000020830	Vmo1
ENSMUSG00000022225	Cma1
ENSMUSG00000035835	BC005764
ENSMUSG00000060044	Tmem26
ENSMUSG00000090101	Snhg9
ENSMUSG00000028654	Mycl
ENSMUSG00000017978	Cadps2
ENSMUSG00000033196	Myh2
ENSMUSG00000062785	Kcnc3
ENSMUSG00000048899	Rimkla
ENSMUSG00000030137	Tuba8
ENSMUSG00000048096	Lmod1
ENSMUSG00000034258	Mfsd7c
ENSMUSG00000086726	Gm9458
ENSMUSG00000034648	Lrrn1
ENSMUSG00000042873	Lhfpl4
ENSMUSG00000022032	Scara5
ENSMUSG00000036578	Fxyd7
ENSMUSG00000018339	Gpx3
ENSMUSG00000032511	Scn5a
ENSMUSG00000029410	Ppef2
ENSMUSG00000085213	Gm13091
ENSMUSG00000030376	Slc8a2
ENSMUSG00000005360	Slc1a3
ENSMUSG00000097286	Gm26684
ENSMUSG00000021250	Fos
ENSMUSG00000031239	Itm2a
ENSMUSG00000078612	1700024P16Rik
ENSMUSG00000004359	Spic
ENSMUSG00000044461	Shisa2
ENSMUSG00000085445	Gm16348
ENSMUSG00000092626	9130230N09Rik
ENSMUSG00000087361	0610043K17Rik
ENSMUSG00000015653	Steap2
ENSMUSG00000045709	1700023L04Rik
ENSMUSG00000056445	5730446D14Rik
ENSMUSG00000054850	6330419J24Rik
ENSMUSG00000013483	Card14
ENSMUSG00000087610	Gm16253
ENSMUSG00000027073	Prg2
ENSMUSG00000038763	Alpk3
ENSMUSG00000038022	Fam188b
ENSMUSG00000097613	Gm17597
ENSMUSG00000097403	9230116N13Rik
ENSMUSG00000086308	G630016G05Rik
ENSMUSG00000039257	Vstm2b
ENSMUSG00000023349	Clec4n
ENSMUSG00000082031	Gm8097
ENSMUSG00000057716	Tmem178b
ENSMUSG00000095562	Gm21887
ENSMUSG00000028150	Rorc
ENSMUSG00000023036	Pcdhga9
ENSMUSG00000043773	1700048O20Rik
ENSMUSG00000039252	Lgi2
ENSMUSG00000068740	Celsr2
ENSMUSG00000051439	Cd14
ENSMUSG00000034645	Zyg11a
ENSMUSG00000000739	Sult5a1
ENSMUSG00000020125	Elane
ENSMUSG00000029816	Gpnmb
ENSMUSG00000037994	Slc9b2
ENSMUSG00000079722	Ttll2
ENSMUSG00000015966	Il17rb
ENSMUSG00000064294	Aox3
ENSMUSG00000090486	BC035947
ENSMUSG00000001665	Gstt3
ENSMUSG00000089317	Snord123
ENSMUSG00000000120	Ngfr
ENSMUSG00000070873	Lilra5
ENSMUSG00000073680	Tmem88b
ENSMUSG00000074361	C5ar2
ENSMUSG00000087600	Gm14454
ENSMUSG00000082776	Gm7061
ENSMUSG00000063564	Col23a1
ENSMUSG00000024903	Lao1
ENSMUSG00000032085	Tagln
ENSMUSG00000050503	Fbxl22
ENSMUSG00000018830	Myh11
ENSMUSG00000031340	Gabre
ENSMUSG00000087346	Gm5699
ENSMUSG00000031898	Dpep3
ENSMUSG00000015970	Chdh
ENSMUSG00000030806	Stx1b
ENSMUSG00000097124	A530020G20Rik
ENSMUSG00000044139	Prss53
ENSMUSG00000082361	Btc
ENSMUSG00000036062	N28178
ENSMUSG00000038068	Rnf144b
ENSMUSG00000027556	Car1
ENSMUSG00000097336	Fendrr
ENSMUSG00000024076	Vit
ENSMUSG00000047592	Nxpe5
ENSMUSG00000045281	Gpr20
ENSMUSG00000059146	Ntrk3
ENSMUSG00000003526	Prodh
ENSMUSG00000021200	Asb2
ENSMUSG00000045625	Pigz
ENSMUSG00000020251	Glt8d2
ENSMUSG00000027901	Dennd2d
ENSMUSG00000068522	Aard
ENSMUSG00000031283	Chrdl1
ENSMUSG00000053117	E330013P04Rik
ENSMUSG00000097876	Gm16892
ENSMUSG00000012187	Mogat1
ENSMUSG00000097885	5031434O11Rik
ENSMUSG00000003206	Ebi3
ENSMUSG00000086541	Has2os
ENSMUSG00000021478	Drd1a
ENSMUSG00000039629	Strip2
ENSMUSG00000022053	Ebf2
ENSMUSG00000097354	2310001H17Rik
ENSMUSG00000046480	Scn4b
ENSMUSG00000029919	Hpgds
ENSMUSG00000039910	Cited2
ENSMUSG00000036196	Slc26a8
ENSMUSG00000032064	Dixdc1
ENSMUSG00000075408	6030408B16Rik
ENSMUSG00000067818	Myl9
ENSMUSG00000010663	Fads1
ENSMUSG00000085743	8430419K02Rik
ENSMUSG00000058756	Thra
ENSMUSG00000023781	Hes7
ENSMUSG00000023966	Rsph9
ENSMUSG00000025610	Map3k7cl
ENSMUSG00000078349	AW011738
ENSMUSG00000084880	Gm14872
ENSMUSG00000075410	Gm11744
ENSMUSG00000028351	Brinp1
ENSMUSG00000097327	E030030I06Rik
ENSMUSG00000039903	Eva1c
ENSMUSG00000021356	Irf4
ENSMUSG00000020435	Osbp2
ENSMUSG00000030149	Klrk1
ENSMUSG00000001663	Gstt1
ENSMUSG00000027199	Gatm
ENSMUSG00000027296	Itpka
ENSMUSG00000097216	4932441J04Rik
ENSMUSG00000017817	Jph2
ENSMUSG00000035352	Ccl12
ENSMUSG00000073144	4930599N23Rik
ENSMUSG00000040856	Dlk1
ENSMUSG00000087120	Gm12279
ENSMUSG00000074796	Slc4a11
ENSMUSG00000024049	Myom1
ENSMUSG00000060961	Slc4a4
ENSMUSG00000048040	Arxes2
ENSMUSG00000085881	Gm15912
ENSMUSG00000036655	Colec11
ENSMUSG00000025735	Rhbdl1
ENSMUSG00000097786	4933429H19Rik
ENSMUSG00000026321	Tnfrsf11a
ENSMUSG00000047330	Kcne4
ENSMUSG00000087475	4933406I18Rik
ENSMUSG00000029126	Nsg1
ENSMUSG00000097365	C030034L19Rik
ENSMUSG00000037621	Atoh8
ENSMUSG00000039899	Fgl2
ENSMUSG00000030924	2610020H08Rik
ENSMUSG00000055602	Tcp10b
ENSMUSG00000022847	Thpo
ENSMUSG00000053063	Clec12a
ENSMUSG00000095789	Nupr1l
ENSMUSG00000032122	Slc37a2
ENSMUSG00000026676	Ccdc3
ENSMUSG00000027035	Cers6
ENSMUSG00000037005	Xpnpep2
ENSMUSG00000021379	Id4
ENSMUSG00000044724	Gpr152
ENSMUSG00000025420	Katnal2
ENSMUSG00000031808	Slc27a1
ENSMUSG00000031748	Gnao1
ENSMUSG00000015947	Fcgr1
ENSMUSG00000045045	Lrfn4
ENSMUSG00000085105	Gm12758
ENSMUSG00000021136	Smoc1
ENSMUSG00000038155	Gstp2
ENSMUSG00000032066	Bco2
ENSMUSG00000030336	Cd27
ENSMUSG00000087445	Gm14286
ENSMUSG00000028789	Adc
ENSMUSG00000085558	4930412C18Rik
ENSMUSG00000039193	Nlrc4
ENSMUSG00000047507	Baiap3
ENSMUSG00000042333	Tnfrsf14
ENSMUSG00000026888	Grb14
ENSMUSG00000019278	Dpep1
ENSMUSG00000039958	Mettl20
ENSMUSG00000073490	AI607873
ENSMUSG00000053749	Gm9920
ENSMUSG00000090086	AI480526
ENSMUSG00000024672	Ms4a7
ENSMUSG00000028487	Bnc2
ENSMUSG00000047986	Palm3
ENSMUSG00000022425	Enpp2
ENSMUSG00000075389	2810410L24Rik
ENSMUSG00000091191	Gm17334
ENSMUSG00000029417	Cxcl9
ENSMUSG00000072893	4933439C10Rik
ENSMUSG00000030474	Siglece
ENSMUSG00000003032	Klf4
ENSMUSG00000020681	Ace
ENSMUSG00000079168	Cd209g
ENSMUSG00000006342	Susd2
ENSMUSG00000021215	Net1
ENSMUSG00000030317	Timp4
ENSMUSG00000030930	Chst15
ENSMUSG00000051504	Siglech
ENSMUSG00000085287	4833418N02Rik
ENSMUSG00000040339	Fam102b
ENSMUSG00000086881	Gm13594
ENSMUSG00000055148	Klf2
ENSMUSG00000021390	Ogn
ENSMUSG00000038349	Plcl1
ENSMUSG00000071103	1700029J07Rik
ENSMUSG00000025461	Cd163l1
ENSMUSG00000028464	Tpm2
ENSMUSG00000097494	4933406C10Rik
ENSMUSG00000029373	Pf4
ENSMUSG00000051331	Cacna1c
ENSMUSG00000090936	Gm17705
ENSMUSG00000035258	Abi3bp
ENSMUSG00000074743	Thbd
ENSMUSG00000042812	Foxf1
ENSMUSG00000043993	2900052L18Rik
ENSMUSG00000097236	4831440E17Rik
ENSMUSG00000041117	Ccdc8
ENSMUSG00000086889	Gm8619
ENSMUSG00000042340	Ctf1
ENSMUSG00000025877	Hk3
ENSMUSG00000038156	Spon1
ENSMUSG00000022665	Ccdc80
ENSMUSG00000020102	Slc16a7
ENSMUSG00000026315	Serpinb8
ENSMUSG00000021508	Cxcl14
ENSMUSG00000032038	St3gal4
ENSMUSG00000027408	Cpxm1
ENSMUSG00000037225	Fgf2
ENSMUSG00000087611	4930458D05Rik
ENSMUSG00000087259	2610035D17Rik
ENSMUSG00000049241	Gpr81
ENSMUSG00000023992	Trem2
ENSMUSG00000085024	C230035I16Rik
ENSMUSG00000015134	Aldh1a3
ENSMUSG00000052392	Acot4
ENSMUSG00000049130	C5ar1
ENSMUSG00000031489	Adrb3
ENSMUSG00000051906	Cd209f
ENSMUSG00000097123	Gm6297
ENSMUSG00000033965	Slc16a2
ENSMUSG00000000318	Clec10a
ENSMUSG00000029436	Mmp17
ENSMUSG00000046447	Camk2n1
ENSMUSG00000097974	Gm10605
ENSMUSG00000035283	Adrb1
ENSMUSG00000032898	Fbxo21
ENSMUSG00000085042	2010001M06Rik
ENSMUSG00000038777	Sema6c
ENSMUSG00000022947	Cbr3
ENSMUSG00000037735	2810032G03Rik
ENSMUSG00000093483	AA465934
ENSMUSG00000028195	Cyr61
ENSMUSG00000028214	Gem
ENSMUSG00000001870	Ltbp1
ENSMUSG00000033777	Tlr13
ENSMUSG00000086782	E130102H24Rik
ENSMUSG00000052563	D930048N14Rik
ENSMUSG00000022148	Fyb
ENSMUSG00000037759	Ptger2
ENSMUSG00000032717	Mdfi
ENSMUSG00000013921	Clip3
ENSMUSG00000041540	Sox5
ENSMUSG00000035967	Ddx26b
ENSMUSG00000020709	Adap2
ENSMUSG00000035713	Usp35
ENSMUSG00000038463	Olfml2b
ENSMUSG00000096935	1700113A16Rik
ENSMUSG00000004105	Angptl2
ENSMUSG00000097640	Gm20033
ENSMUSG00000028337	Coro2a
ENSMUSG00000040345	Arhgap9
ENSMUSG00000087163	Gm16230
ENSMUSG00000034522	Zfp395
ENSMUSG00000066571	4931406P16Rik
ENSMUSG00000075394	Hoxc4
ENSMUSG00000031093	Dock11
ENSMUSG00000022129	Dct
ENSMUSG00000066800	Rnasel
ENSMUSG00000049092	Gpr137c
ENSMUSG00000052684	Jun
ENSMUSG00000028600	Podn
ENSMUSG00000044749	Abca6
ENSMUSG00000022305	Lrp12
ENSMUSG00000034652	Cd300a
ENSMUSG00000054203	Ifi205
ENSMUSG00000053411	Cbx7
ENSMUSG00000019929	Dcn
ENSMUSG00000032643	Fhl3
ENSMUSG00000066113	Adamtsl1
ENSMUSG00000024524	Gnal
ENSMUSG00000050541	Adra1b
ENSMUSG00000045730	Adrb2
ENSMUSG00000092981	Mir5125
ENSMUSG00000019944	Rhobtb1
ENSMUSG00000031129	Slc9a9
ENSMUSG00000050315	Synpo2
ENSMUSG00000026068	Il18rap
ENSMUSG00000024087	Cyp1b1
ENSMUSG00000026692	Fmo4
ENSMUSG00000040987	Mill2
ENSMUSG00000055027	Smyd1
ENSMUSG00000015452	Ager
ENSMUSG00000020672	Sntg2
ENSMUSG00000090622	A930033H14Rik
ENSMUSG00000054871	Tmem158
ENSMUSG00000074622	Mafb
ENSMUSG00000032322	Pstpip1
ENSMUSG00000044811	AF251705
ENSMUSG00000090877	Hspa1b
ENSMUSG00000021451	Sema4d
ENSMUSG00000044788	Fads6
ENSMUSG00000040502	March9
ENSMUSG00000030148	Clec4a2
ENSMUSG00000078794	Dact3
ENSMUSG00000035764	Fbxo45
ENSMUSG00000042745	Id1
ENSMUSG00000098178	Gm26924
ENSMUSG00000053552	Ebf4
ENSMUSG00000097534	Gm16675
ENSMUSG00000057802	Gm10030
ENSMUSG00000024247	Pkdcc
ENSMUSG00000027221	Chst1
ENSMUSG00000060131	Atp8b4
ENSMUSG00000025017	Pik3ap1
ENSMUSG00000031451	Gas6
ENSMUSG00000066175	2510046G10Rik
ENSMUSG00000097509	B230322F03Rik
ENSMUSG00000070315	4930581F22Rik
ENSMUSG00000046080	Clec9a
ENSMUSG00000040272	Accs
ENSMUSG00000052727	Map1b
ENSMUSG00000038893	Fam117a
ENSMUSG00000098024	Gm27003
ENSMUSG00000004267	Eno2
ENSMUSG00000004814	Ccl24
ENSMUSG00000097042	Gm17491
ENSMUSG00000025537	Phkg1
ENSMUSG00000042672	Dcst1
ENSMUSG00000056666	Retsat
ENSMUSG00000084799	Gm11602
ENSMUSG00000031425	Plp1
ENSMUSG00000028601	Echdc2
ENSMUSG00000086859	2810008D09Rik
ENSMUSG00000014361	Mertk
ENSMUSG00000030731	Syt3
ENSMUSG00000050240	Hic2
ENSMUSG00000013707	Tnfaip8l2
ENSMUSG00000026688	Mgst3
ENSMUSG00000022747	St3gal6
ENSMUSG00000006850	Tmco6
ENSMUSG00000058246	Gm10037
ENSMUSG00000032609	Klhdc8b
ENSMUSG00000096956	0610007N19Rik
ENSMUSG00000024136	Dnase1l2
ENSMUSG00000026177	Slc11a1
ENSMUSG00000071181	3830408C21Rik
ENSMUSG00000031740	Mmp2
ENSMUSG00000040552	C3ar1
ENSMUSG00000020331	Hcn2
ENSMUSG00000067586	S1pr3
ENSMUSG00000086938	4930481A15Rik
ENSMUSG00000081769	Gm12216
ENSMUSG00000048406	B330016D10Rik
ENSMUSG00000073418	C4b
ENSMUSG00000097863	1010001B22Rik
ENSMUSG00000021474	Sfxn1
ENSMUSG00000048807	Slc35e4
ENSMUSG00000047793	Sned1
ENSMUSG00000045968	5830403L16Rik
ENSMUSG00000073985	Gm10602
ENSMUSG00000037762	Slc16a9
ENSMUSG00000027544	Nfatc2
ENSMUSG00000045680	Tcf21
ENSMUSG00000030560	Ctsc
ENSMUSG00000022901	Cd86
ENSMUSG00000048603	Gm9828
ENSMUSG00000024985	Tcf7l2
ENSMUSG00000028373	Astn2
ENSMUSG00000061882	Ccdc62
ENSMUSG00000023050	Map3k12
ENSMUSG00000056708	Ier5
ENSMUSG00000038894	Irs2
ENSMUSG00000024300	Myo1f
ENSMUSG00000079505	Gm11131
ENSMUSG00000025453	Nnt
ENSMUSG00000040855	Reps2
ENSMUSG00000030699	Tbx6
ENSMUSG00000085527	Gm15535
ENSMUSG00000007805	Twist2
ENSMUSG00000034842	Art3
ENSMUSG00000038351	Sgsm2
ENSMUSG00000032265	Fam46a
ENSMUSG00000035184	Fam124a
ENSMUSG00000045672	Col27a1
ENSMUSG00000025104	Hdgfrp3
ENSMUSG00000070407	Hs3st3b1
ENSMUSG00000031066	Usp11
ENSMUSG00000027559	Car3
ENSMUSG00000055799	Tcf7l1
ENSMUSG00000031626	Sorbs2
ENSMUSG00000031605	Klhl2
ENSMUSG00000017466	Timp2
ENSMUSG00000038914	Dido1
ENSMUSG00000037664	Cdkn1c
ENSMUSG00000024972	Lgals12
ENSMUSG00000039457	Ppl
ENSMUSG00000034041	Lyl1
ENSMUSG00000096971	4930556M19Rik
ENSMUSG00000090207	4930524O07Rik
ENSMUSG00000002111	Spi1
ENSMUSG00000027669	Gnb4
ENSMUSG00000031951	Tmem231
ENSMUSG00000028167	Bdh2
ENSMUSG00000022231	Sema5a
ENSMUSG00000030917	Tmem159
ENSMUSG00000085829	Gm4285
ENSMUSG00000029591	Ung
ENSMUSG00000021322	Aoah
ENSMUSG00000030579	Tyrobp
ENSMUSG00000018774	Cd68
ENSMUSG00000079242	C730034F03Rik
ENSMUSG00000042116	Vwa1
ENSMUSG00000031618	Nr3c2
ENSMUSG00000052676	Zmat1
ENSMUSG00000026879	Gsn
ENSMUSG00000069171	Nr2f1
ENSMUSG00000073489	Ifi204
ENSMUSG00000015396	Cd83
ENSMUSG00000068299	1700019G17Rik
ENSMUSG00000034641	Cd300ld
ENSMUSG00000005803	Sqrdl
ENSMUSG00000072770	Acrbp
ENSMUSG00000073758	Sh3d21
ENSMUSG00000074170	Plekhf1
ENSMUSG00000033658	Ddx19b
ENSMUSG00000029231	Pdgfra
ENSMUSG00000040181	Fmo1
ENSMUSG00000028207	Asph
ENSMUSG00000031980	Agt
ENSMUSG00000029381	Shroom3
ENSMUSG00000073557	Ppp1r12b
ENSMUSG00000097383	1500026H17Rik
ENSMUSG00000096929	A330023F24Rik
ENSMUSG00000048240	Gng7
ENSMUSG00000036995	Asap3
ENSMUSG00000059498	Fcgr3
ENSMUSG00000047497	Adamts12
ENSMUSG00000024302	Dtna
ENSMUSG00000097047	1110020A21Rik
ENSMUSG00000091811	Prr24
ENSMUSG00000021209	Ppp4r4
ENSMUSG00000020122	Egfr
ENSMUSG00000039628	Hs3st6
ENSMUSG00000059325	Hopx
ENSMUSG00000021054	Sgpp1
ENSMUSG00000024397	Aif1
ENSMUSG00000052934	Fbxo31
ENSMUSG00000034810	Scn7a
ENSMUSG00000073478	D730003I15Rik
ENSMUSG00000060600	Eno3
ENSMUSG00000059901	Adamts14
ENSMUSG00000097162	2310010J17Rik
ENSMUSG00000031295	Phka2
ENSMUSG00000036560	Lgi4
ENSMUSG00000037148	Arhgap10
ENSMUSG00000097048	1600020E01Rik
ENSMUSG00000022468	Endou
ENSMUSG00000021822	Plau
ENSMUSG00000022040	Ephx2
ENSMUSG00000054619	Mettl7a1
ENSMUSG00000043415	Otud1
ENSMUSG00000001348	Acp5
ENSMUSG00000056698	Elmod3
ENSMUSG00000022421	Nptxr
ENSMUSG00000026930	Gpsm1
ENSMUSG00000038775	Vill
ENSMUSG00000087381	Gm16008
ENSMUSG00000032698	Lmo2
ENSMUSG00000085667	Gm12992
ENSMUSG00000066684	Pilrb1
ENSMUSG00000002668	Dennd1c
ENSMUSG00000057982	Zfp809
ENSMUSG00000026979	Psd4
ENSMUSG00000033207	Mamdc2
ENSMUSG00000020644	Id2
ENSMUSG00000089726	Mir17hg
ENSMUSG00000059540	Tcea2
ENSMUSG00000086914	Gm16124
ENSMUSG00000052151	Ppap2c
ENSMUSG00000025784	Clec3b
ENSMUSG00000056529	Ptafr
ENSMUSG00000042289	Hsd3b7
ENSMUSG00000000359	Rem1
ENSMUSG00000085795	Zfp703
ENSMUSG00000063193	Cd300lb
ENSMUSG00000021047	Nova1
ENSMUSG00000029061	Mmp23
ENSMUSG00000026126	Ptpn18
ENSMUSG00000058715	Fcer1g
ENSMUSG00000026208	Des
ENSMUSG00000031545	Agpat6
ENSMUSG00000030703	Gdpd3
ENSMUSG00000026548	Slamf9
ENSMUSG00000037166	Ppp1r14a
ENSMUSG00000043671	Dpy19l3
ENSMUSG00000022014	Epsti1
ENSMUSG00000049532	Sall2
ENSMUSG00000024193	Phf1
ENSMUSG00000063810	Alms1
ENSMUSG00000024621	Csf1r
ENSMUSG00000026670	Uap1
ENSMUSG00000020123	Avpr1a
ENSMUSG00000038530	Rgs4
ENSMUSG00000079491	H2-T10
ENSMUSG00000038967	Pdk2
ENSMUSG00000049191	Rgag4
ENSMUSG00000089736	Gm14378
ENSMUSG00000092564	BC051226
ENSMUSG00000024304	Cdh2
ENSMUSG00000056973	Ces1d
ENSMUSG00000052160	Pld4
ENSMUSG00000037363	Letm2
ENSMUSG00000016356	Col20a1
ENSMUSG00000026480	Ncf2
ENSMUSG00000086714	0610009E02Rik
ENSMUSG00000007039	Ddah2
ENSMUSG00000022550	Adck5
ENSMUSG00000028347	Tmeff1
ENSMUSG00000049892	Rasd1
ENSMUSG00000069515	Lyz1
ENSMUSG00000006958	Chrd
ENSMUSG00000029771	Irf5
ENSMUSG00000047875	Gpr157
ENSMUSG00000028369	Svep1
ENSMUSG00000039759	Thap3
ENSMUSG00000040428	Plekha4
ENSMUSG00000030263	Lrmp
ENSMUSG00000027962	Vcam1
ENSMUSG00000097750	Gm4673
ENSMUSG00000019320	Noxo1
ENSMUSG00000026674	Ddr2
ENSMUSG00000049037	Clec4a1
ENSMUSG00000024678	Ms4a4d
ENSMUSG00000052688	5430435G22Rik
ENSMUSG00000051817	Sox12
ENSMUSG00000089715	Cbx6
ENSMUSG00000037266	D4Wsu53e
ENSMUSG00000096606	Gm4980
ENSMUSG00000089941	Gm16168
ENSMUSG00000044786	Zfp36
ENSMUSG00000026504	Sdccag8
ENSMUSG00000096727	Psmb9
ENSMUSG00000058396	Gpr182
ENSMUSG00000023411	Nfatc4
ENSMUSG00000031616	Ednra
ENSMUSG00000001288	Rarg
ENSMUSG00000024610	Cd74
ENSMUSG00000031169	Porcn
ENSMUSG00000037419	Endod1
ENSMUSG00000039145	Camk1d
ENSMUSG00000001128	Cfp
ENSMUSG00000056214	Pard6g
ENSMUSG00000063060	Sox7
ENSMUSG00000086587	Gm11837
ENSMUSG00000026430	Rassf5
ENSMUSG00000039199	Zdhhc1
ENSMUSG00000066456	Hmgn3
ENSMUSG00000027947	Il6ra
ENSMUSG00000030844	Rgs10
ENSMUSG00000058818	Pirb
ENSMUSG00000024338	Psmb8
ENSMUSG00000037172	E330009J07Rik
ENSMUSG00000048232	Fbxo10
ENSMUSG00000070997	1700055D18Rik
ENSMUSG00000079484	Phyhd1
ENSMUSG00000079560	Hoxa3
ENSMUSG00000029314	Agpat9
ENSMUSG00000072964	Bhlhb9
ENSMUSG00000053040	Aph1c
ENSMUSG00000070002	Ell
ENSMUSG00000024818	Slc25a45
ENSMUSG00000014158	Trpv4
ENSMUSG00000057054	Inca1
ENSMUSG00000047878	A4galt
ENSMUSG00000038393	Txnip
ENSMUSG00000034786	Gpsm3
ENSMUSG00000011263	Exoc3l2
ENSMUSG00000026004	Kansl1l
ENSMUSG00000020758	Itgb4
ENSMUSG00000040093	Bmf
ENSMUSG00000002227	Mov10
ENSMUSG00000035121	Neil2
ENSMUSG00000022488	Nckap1l
ENSMUSG00000066892	Fbxl12
ENSMUSG00000050379	Sept6
ENSMUSG00000027074	Slc43a3
ENSMUSG00000021998	Lcp1
ENSMUSG00000032584	Mst1r
ENSMUSG00000012428	Steap4
ENSMUSG00000023022	Lima1
ENSMUSG00000055692	Tmem191c
ENSMUSG00000055485	Soga1
ENSMUSG00000024013	Fgd2
ENSMUSG00000025533	Asl
ENSMUSG00000005718	Tfap4
ENSMUSG00000028248	Sfrs18
ENSMUSG00000018509	Cenpv
ENSMUSG00000061353	Cxcl12
ENSMUSG00000097415	AU020206
ENSMUSG00000011148	Adssl1
ENSMUSG00000019899	Lama2
ENSMUSG00000028581	Laptm5
ENSMUSG00000053080	2700081O15Rik
ENSMUSG00000036053	Fmnl2
ENSMUSG00000025213	Kazald1
ENSMUSG00000032548	Slco2a1
ENSMUSG00000025993	Slc40a1
ENSMUSG00000006219	Fblim1
ENSMUSG00000092241	Gm20522
ENSMUSG00000029068	Ccnl2
ENSMUSG00000001930	Vwf
ENSMUSG00000021902	Phf7
ENSMUSG00000019487	Trip10
ENSMUSG00000075415	Fnbp1
ENSMUSG00000029674	Limk1
ENSMUSG00000035279	Ssc5d
ENSMUSG00000015053	Gata2
ENSMUSG00000027075	Slc43a1
ENSMUSG00000048537	Phldb1
ENSMUSG00000027257	Pacsin3
ENSMUSG00000020886	Dlg4
ENSMUSG00000018008	Cyth4
ENSMUSG00000063558	Aox1
ENSMUSG00000029311	Hsd17b11
ENSMUSG00000095123	Gm21781
ENSMUSG00000086533	Gm16266
ENSMUSG00000026034	Clk1
ENSMUSG00000028108	Ecm1
ENSMUSG00000040964	Arhgef10l
ENSMUSG00000038290	Smg6
ENSMUSG00000097296	Gm26532
ENSMUSG00000022489	Pde1b
ENSMUSG00000020888	Dvl2
ENSMUSG00000025887	Casp12
ENSMUSG00000022843	Clcn2
ENSMUSG00000026211	Obsl1
ENSMUSG00000059970	Hspa2
ENSMUSG00000078670	Fam174b
ENSMUSG00000033318	Gstt2
ENSMUSG00000097589	Dleu2
ENSMUSG00000040482	Dxo
ENSMUSG00000034235	Usp54
ENSMUSG00000023942	Slc29a1
ENSMUSG00000071076	Jund
ENSMUSG00000032607	Amt
ENSMUSG00000018537	Pcgf2
ENSMUSG00000035545	Leng8
ENSMUSG00000030589	Rasgrp4
ENSMUSG00000048218	Amigo2
ENSMUSG00000021265	Slc25a29
ENSMUSG00000022102	Dok2
ENSMUSG00000045216	Hs6st1
ENSMUSG00000030095	Tmem43
ENSMUSG00000039217	Il18
ENSMUSG00000084910	C630043F03Rik
ENSMUSG00000040663	Clcf1
ENSMUSG00000052957	Gas1
ENSMUSG00000049657	Zbtb5
ENSMUSG00000047777	Phf13
ENSMUSG00000008206	Cers4
ENSMUSG00000038569	Rad9b
ENSMUSG00000035158	Mitf
ENSMUSG00000097772	5430416N02Rik
ENSMUSG00000026712	Mrc1
ENSMUSG00000005611	Mrvi1
ENSMUSG00000022893	Adamts1
ENSMUSG00000025175	Fn3k
ENSMUSG00000006576	Slc4a3
ENSMUSG00000023909	Paqr4
ENSMUSG00000043631	Ecm2
ENSMUSG00000040618	Pck2
ENSMUSG00000038456	Dennd2a
ENSMUSG00000066258	Trim12a
ENSMUSG00000038884	A230050P20Rik
ENSMUSG00000024835	Coro1b
ENSMUSG00000041828	Abca8a
ENSMUSG00000047496	Rnf152
ENSMUSG00000023150	Ivns1abp
ENSMUSG00000020902	Ntn1
ENSMUSG00000035697	Hmha1
ENSMUSG00000020160	Meis1
ENSMUSG00000018841	Rad51d
ENSMUSG00000063160	Numbl
ENSMUSG00000036249	Rbm43
ENSMUSG00000040928	S100pbp
ENSMUSG00000028776	Tinagl1
ENSMUSG00000018899	Irf1
ENSMUSG00000027678	Ncoa3
ENSMUSG00000055980	Irs1
ENSMUSG00000008167	Fbxw9
ENSMUSG00000030337	Vamp1
ENSMUSG00000074282	Zfp94
ENSMUSG00000048772	Tmem53
ENSMUSG00000087138	Gm15545
ENSMUSG00000042073	Abhd14b
ENSMUSG00000003420	Fcgrt
ENSMUSG00000024845	Tmem134
ENSMUSG00000097059	Fam120aos
ENSMUSG00000041130	Zfp598
ENSMUSG00000097141	Gm10524
ENSMUSG00000041328	Pcf11
ENSMUSG00000024403	Atp6v1g2
ENSMUSG00000060791	Gmfg
ENSMUSG00000020766	Galk1
ENSMUSG00000034930	Rtkn
ENSMUSG00000039236	Isg20
ENSMUSG00000053560	Ier2
ENSMUSG00000059173	Pde1a
ENSMUSG00000034610	Zcchc11
ENSMUSG00000020472	Zkscan17
ENSMUSG00000016206	H2-M3
ENSMUSG00000022037	Clu
ENSMUSG00000086448	9330162012Rik
ENSMUSG00000000530	Acvrl1
ENSMUSG00000072772	Grcc10
ENSMUSG00000050174	Nudt6
ENSMUSG00000029416	Slc15a4
ENSMUSG00000070427	Il18bp
ENSMUSG00000036459	Wtip
ENSMUSG00000025558	Dock9
ENSMUSG00000034673	Pbx2
ENSMUSG00000006731	B4galnt1
ENSMUSG00000020105	Lrig3
ENSMUSG00000033781	Asb13
ENSMUSG00000025010	Ccnj
ENSMUSG00000021947	Cryl1
ENSMUSG00000097061	9330151L19Rik
ENSMUSG00000027646	Src
ENSMUSG00000035208	Slfn8
ENSMUSG00000020828	Pld2
ENSMUSG00000020773	Trim47
ENSMUSG00000085396	6720401G13Rik
ENSMUSG00000029165	Agbl5
ENSMUSG00000031360	Ctps2
ENSMUSG00000042331	Specc1
ENSMUSG00000038267	Slc22a23
ENSMUSG00000042129	Rassf4
ENSMUSG00000021495	Fam193b
ENSMUSG00000004558	Ndrg2
ENSMUSG00000036908	Unc93b1
ENSMUSG00000039081	Zfp503
ENSMUSG00000036894	Rap2b
ENSMUSG00000031216	Stard8
ENSMUSG00000039960	Rhou
ENSMUSG00000003378	Grik5
ENSMUSG00000028128	F3
ENSMUSG00000024889	Rce1
ENSMUSG00000039218	Srrm2
ENSMUSG00000042286	Stab1
ENSMUSG00000029650	Slc46a3
ENSMUSG00000020592	Sdc1
ENSMUSG00000080316	4930546H06Rik
ENSMUSG00000042320	Prox2
ENSMUSG00000018417	Myo1b
ENSMUSG00000038305	Spats2l
ENSMUSG00000024914	Drap1
ENSMUSG00000025409	Mbd6
ENSMUSG00000043518	Rai2
ENSMUSG00000028104	Polr3gl
ENSMUSG00000078607	1810010H24Rik
ENSMUSG00000072915	Gm12258
ENSMUSG00000024085	Man2a1
ENSMUSG00000001156	Mxd1
ENSMUSG00000002109	Ddb2
ENSMUSG00000001052	Sec24b
ENSMUSG00000027381	Bcl2l11
ENSMUSG00000090952	Gm17251
ENSMUSG00000026170	Cyp27a1
ENSMUSG00000035277	Arx
ENSMUSG00000037321	Tap1
ENSMUSG00000028653	Trit1
ENSMUSG00000047180	Neurl3
ENSMUSG00000028634	Hivep3
ENSMUSG00000072889	Nfxl1
ENSMUSG00000031755	Bbs2
ENSMUSG00000038170	Pde4dip
ENSMUSG00000000531	Grasp
ENSMUSG00000031486	Gpr124
ENSMUSG00000090386	2810055G20Rik
ENSMUSG00000026483	Fam129a
ENSMUSG00000044712	Slc38a6
ENSMUSG00000045817	Zfp36l2
ENSMUSG00000015850	Adamtsl4
ENSMUSG00000040659	Efhd2
ENSMUSG00000024462	Gabbr1
ENSMUSG00000025612	Bach1
ENSMUSG00000033434	Gtpbp6
ENSMUSG00000051413	Plagl2
ENSMUSG00000031728	Zfp821
ENSMUSG00000015702	Anxa9
ENSMUSG00000071454	Dtnb
ENSMUSG00000024163	Mapk8ip3
ENSMUSG00000097006	9530082P21Rik
ENSMUSG00000032565	Nudt16
ENSMUSG00000028088	Fmo5
ENSMUSG00000035275	Raver2
ENSMUSG00000034903	Cobll1
ENSMUSG00000029455	Aldh2
ENSMUSG00000038910	Plcl2
ENSMUSG00000002504	Slc9a3r2
ENSMUSG00000036256	Igfbp7
ENSMUSG00000029714	Gigyf1
ENSMUSG00000038372	Gmds
ENSMUSG00000037020	Wdr62
ENSMUSG00000043099	Hic1
ENSMUSG00000055862	Izumo4
ENSMUSG00000035637	Grhpr
ENSMUSG00000051007	Pddc1
ENSMUSG00000061751	Kalrn
ENSMUSG00000067212	H2-T23
ENSMUSG00000000154	Slc22a18
ENSMUSG00000020453	Patz1
ENSMUSG00000029338	Antxr2
ENSMUSG00000028793	Rnf19b
ENSMUSG00000041775	Mapk1ip1
ENSMUSG00000020994	Pnn
ENSMUSG00000032251	Irak1bp1
ENSMUSG00000033088	Triobp
ENSMUSG00000058706	0610030E20Rik
ENSMUSG00000017756	Slc12a7
ENSMUSG00000028980	H6pd
ENSMUSG00000049739	Zfp646
ENSMUSG00000022562	Oplah
ENSMUSG00000059866	Tnip2
ENSMUSG00000078919	Dpm1
ENSMUSG00000019823	Mical1
ENSMUSG00000037638	Zbtb42
ENSMUSG00000020484	Xbp1
ENSMUSG00000043833	2900005J15Rik
ENSMUSG00000092260	Zfp963
ENSMUSG00000027177	Hipk3
ENSMUSG00000027332	Ivd
ENSMUSG00000030779	Rbbp6
ENSMUSG00000092274	Neat1
ENSMUSG00000038145	Snrk
ENSMUSG00000085028	Slc2a4rg-ps
ENSMUSG00000054520	Sh3bp2
ENSMUSG00000045658	Pid1
ENSMUSG00000039062	Anpep
ENSMUSG00000044068	Zrsr1
ENSMUSG00000031024	St5
ENSMUSG00000043895	S1pr2
ENSMUSG00000075592	Nynrin
ENSMUSG00000097743	Gm16973
ENSMUSG00000028041	Adam15
ENSMUSG00000044250	Pced1b
ENSMUSG00000026946	Nmi
ENSMUSG00000056131	Pgm3
ENSMUSG00000028957	Per3
ENSMUSG00000054509	Parp4
ENSMUSG00000038593	Tctn1
ENSMUSG00000030727	Rabep2
ENSMUSG00000031828	Klhl36
ENSMUSG00000062861	Zfp28
ENSMUSG00000029001	Fbxo44
ENSMUSG00000004952	Rasa4
ENSMUSG00000073147	5031425E22Rik
ENSMUSG00000020196	Cabin1
ENSMUSG00000025823	Pdia4
ENSMUSG00000067787	Blcap
ENSMUSG00000027358	Bmp2
ENSMUSG00000009418	Nav1
ENSMUSG00000017446	C1qtnf1
ENSMUSG00000040415	Dtx3
ENSMUSG00000022453	Naga
ENSMUSG00000044345	Marveld1
ENSMUSG00000055435	Maf
ENSMUSG00000005973	Rcn1
ENSMUSG00000022708	Zbtb20
ENSMUSG00000063450	Syne2
ENSMUSG00000068966	Zbtb34
ENSMUSG00000056185	Snx32
ENSMUSG00000040841	Six5
ENSMUSG00000054939	Zfp174
ENSMUSG00000063856	Gpx1
ENSMUSG00000019505	Ubb
ENSMUSG00000026956	Uap1l1
ENSMUSG00000028015	Ctso
ENSMUSG00000014599	Csf1
ENSMUSG00000050628	Ubald2
ENSMUSG00000036898	Zfp157
ENSMUSG00000019467	Arhgef25
ENSMUSG00000022469	Rapgef3
ENSMUSG00000033256	Shf
ENSMUSG00000024246	Thumpd2
ENSMUSG00000025402	Nab2
ENSMUSG00000024909	Efemp2
ENSMUSG00000015745	Plekho1
ENSMUSG00000025223	Ldb1
ENSMUSG00000026860	Sh3glb2
ENSMUSG00000007216	Zfp775
ENSMUSG00000054381	Zfp747
ENSMUSG00000031875	Cmtm3
ENSMUSG00000030203	Dusp16
ENSMUSG00000020647	Ncoa1
ENSMUSG00000022194	Pabpn1
ENSMUSG00000004446	Bid
ENSMUSG00000055633	Zfp580
ENSMUSG00000018372	Cep95
ENSMUSG00000030671	Pde3b
ENSMUSG00000044080	S100a1
ENSMUSG00000025145	Lrrc45
ENSMUSG00000033767	D930015E06Rik
ENSMUSG00000022574	Naprt1
ENSMUSG00000036948	BC037034
ENSMUSG00000004655	Aqp1
ENSMUSG00000025270	Alas2
ENSMUSG00000006127	Inpp5k
ENSMUSG00000018171	Vmp1
ENSMUSG00000027829	Ccnl1
ENSMUSG00000029726	Mepce
ENSMUSG00000064373	Sepp1
ENSMUSG00000031706	Rfx1
ENSMUSG00000036097	Fam178a
ENSMUSG00000022114	Spry2
ENSMUSG00000002625	Akap8l
ENSMUSG00000038446	Cdc40
ENSMUSG00000030231	Plekha5
ENSMUSG00000027569	Mrgbp
ENSMUSG00000002602	Axl
ENSMUSG00000025870	Arl10
ENSMUSG00000031432	Prps1
ENSMUSG00000027639	Samhd1
ENSMUSG00000036611	Eepd1
ENSMUSG00000026283	Ing5
ENSMUSG00000020806	Rhbdf2
ENSMUSG00000023266	Frs3
ENSMUSG00000044328	Trp53i13
ENSMUSG00000075590	Nrbp2
ENSMUSG00000047907	Tshz2
ENSMUSG00000020263	Appl2
ENSMUSG00000024560	Cxxc1
ENSMUSG00000037902	Sirpa
ENSMUSG00000058881	Zfp516
ENSMUSG00000003031	Cdkn1b
ENSMUSG00000027439	Gzf1
ENSMUSG00000021238	Aldh6a1
ENSMUSG00000045193	Cirbp
ENSMUSG00000019039	Dalrd3
ENSMUSG00000031534	Smim19
ENSMUSG00000001552	Jup
ENSMUSG00000087370	Tmem170b
ENSMUSG00000058638	Zfp110
ENSMUSG00000031537	Ikbkb
ENSMUSG00000038271	Iffo1
ENSMUSG00000025498	Irf7
ENSMUSG00000025915	Sgk3
ENSMUSG00000097320	C630016N16Rik
ENSMUSG00000030861	Acadsb
ENSMUSG00000020572	Nampt
ENSMUSG00000046516	Cox17
ENSMUSG00000040147	Maob
ENSMUSG00000020807	4933427D14Rik
ENSMUSG00000029759	Pon3
ENSMUSG00000057637	Prdm2
ENSMUSG00000025351	Cd63
ENSMUSG00000025314	Ptprj
ENSMUSG00000033697	Arhgap39
ENSMUSG00000042404	Dennd4b
ENSMUSG00000041132	N4bp2l1
ENSMUSG00000010362	Rdm1
ENSMUSG00000028854	Slc9a1
ENSMUSG00000015804	Med28
ENSMUSG00000022358	Fbxo32
ENSMUSG00000021065	Fut8
ENSMUSG00000038836	Agbl3
ENSMUSG00000020547	Bzw2
ENSMUSG00000098557	KCTD12
ENSMUSG00000038425	Poli
ENSMUSG00000031508	Ankrd10
ENSMUSG00000000957	Mmp14
ENSMUSG00000019194	Scn1b
ENSMUSG00000021461	Fancc
ENSMUSG00000042625	Safb2
ENSMUSG00000071001	Hrct1
ENSMUSG00000020034	Tcp11l2
ENSMUSG00000048731	Ggnbp1
ENSMUSG00000063268	Parp10
ENSMUSG00000032633	Flcn
ENSMUSG00000001750	Tcirg1
ENSMUSG00000026788	Zbtb43
ENSMUSG00000044876	Zfp444
ENSMUSG00000030532	Hddc3
ENSMUSG00000046711	Hmga1
ENSMUSG00000021583	Erap1
ENSMUSG00000035929	H2-Q4
ENSMUSG00000059474	Mbtd1
ENSMUSG00000023009	Nckap5l
ENSMUSG00000026604	Ptpn14
ENSMUSG00000039231	Suv39h1
ENSMUSG00000009905	Kdsr
ENSMUSG00000070056	Mfhas1
ENSMUSG00000040234	Tm7sf3
ENSMUSG00000037003	Tenc1
ENSMUSG00000029386	Tctn2
ENSMUSG00000097867	1110054M08Rik
ENSMUSG00000043065	Spice1
ENSMUSG00000038013	Wipf2
ENSMUSG00000039307	Hexdc
ENSMUSG00000033985	Tesk2
ENSMUSG00000024457	Trim26
ENSMUSG00000040430	Pitpnc1
ENSMUSG00000033487	Fndc3a
ENSMUSG00000032411	Tfdp2
ENSMUSG00000032531	Amotl2
ENSMUSG00000022637	Cblb
ENSMUSG00000037656	Slc20a2
ENSMUSG00000026200	Glb1l
ENSMUSG00000020747	2310067B10Rik
ENSMUSG00000022228	Zscan26
ENSMUSG00000048285	Frmd6
ENSMUSG00000025076	Casp7
ENSMUSG00000040007	Bahd1
ENSMUSG00000029178	Klf3
ENSMUSG00000074466	Gm15417
ENSMUSG00000028393	Alad
ENSMUSG00000025184	R3hcc1l
ENSMUSG00000039715	Wdr34
ENSMUSG00000020385	Clk4
ENSMUSG00000021514	Zfp369
ENSMUSG00000020455	Trim11
ENSMUSG00000019952	Poc1b
ENSMUSG00000029860	Zyx
ENSMUSG00000045757	Zfp764
ENSMUSG00000002900	Lamb1
ENSMUSG00000030590	Fam98c
ENSMUSG00000052609	Plekhg3
ENSMUSG00000032733	Snx33
ENSMUSG00000049321	Zfp2
ENSMUSG00000086119	Gm2415
ENSMUSG00000036534	Slc38a7
ENSMUSG00000000282	Mnt
ENSMUSG00000047909	Ankrd16
ENSMUSG00000045409	Trim39
ENSMUSG00000028565	Nfia
ENSMUSG00000034243	Golgb1
ENSMUSG00000054723	Vmac
ENSMUSG00000028911	Srsf4
ENSMUSG00000072258	Taf1a
ENSMUSG00000030852	Tacc2
ENSMUSG00000060216	Arrb2
ENSMUSG00000044674	Fzd1
ENSMUSG00000019647	Sema6a
ENSMUSG00000039501	Znfx1
ENSMUSG00000038976	Ppp1r9b
ENSMUSG00000054517	Trim65
ENSMUSG00000020894	Vamp2
ENSMUSG00000043467	Zbtb37
ENSMUSG00000035342	Lzts2
ENSMUSG00000038957	Edc3
ENSMUSG00000015202	Cnksr3
ENSMUSG00000023007	Prpf40b
ENSMUSG00000027881	Prpf38b
ENSMUSG00000024339	Tap2
ENSMUSG00000030966	Trim21
ENSMUSG00000078671	Chd2
ENSMUSG00000037926	Ssh2
ENSMUSG00000044145	1810024B03Rik
ENSMUSG00000036246	Gmip
ENSMUSG00000079487	Med12
ENSMUSG00000061898	Rbak
ENSMUSG00000050721	Plekho2
ENSMUSG00000022912	Pros1
ENSMUSG00000097574	C920006O11Rik
ENSMUSG00000014245	Pigl
ENSMUSG00000021846	Peli2
ENSMUSG00000025358	Cdk2
ENSMUSG00000003812	Dnase2a
ENSMUSG00000046062	Ppp1r15b
ENSMUSG00000053062	Jam2
ENSMUSG00000017144	Rnd3
ENSMUSG00000024137	E4f1
ENSMUSG00000042138	Msantd2
ENSMUSG00000028709	Mob3c
ENSMUSG00000029456	Acad10
ENSMUSG00000021327	Zkscan3
ENSMUSG00000010660	Plcd1
ENSMUSG00000007570	Fance
ENSMUSG00000022437	Samm50
ENSMUSG00000008540	Mgst1
ENSMUSG00000038545	Cul7
ENSMUSG00000030726	Pold3
ENSMUSG00000046668	Cxxc5
ENSMUSG00000022807	Osbpl11
ENSMUSG00000069495	Epc2
ENSMUSG00000039382	Wdr45
ENSMUSG00000073700	Klhl21
ENSMUSG00000035621	Midn
ENSMUSG00000095440	Fignl2
ENSMUSG00000021400	Wrnip1
ENSMUSG00000046985	Tapt1
ENSMUSG00000030269	Mtmr14
ENSMUSG00000034101	Ctnnd1
ENSMUSG00000061288	Taok3
ENSMUSG00000061130	Ppm1b
ENSMUSG00000002885	Cd97
ENSMUSG00000019951	Uhrf1bp1l
ENSMUSG00000075514	Gm13375
ENSMUSG00000085385	9430008C03Rik
ENSMUSG00000005107	Slc2a9
ENSMUSG00000022969	Il10rb
ENSMUSG00000030826	Bcat2
ENSMUSG00000033170	Card10
ENSMUSG00000056673	Kdm5d
ENSMUSG00000030386	Zfp606
ENSMUSG00000040249	Lrp1
ENSMUSG00000027751	Supt20
ENSMUSG00000071379	Hpcal1
ENSMUSG00000025357	Dgka
ENSMUSG00000047030	Spata2
ENSMUSG00000029413	Naaa
ENSMUSG00000026589	Sec16b
ENSMUSG00000020156	Mum1
ENSMUSG00000036046	5031439G07Rik
ENSMUSG00000013846	St3gal1
ENSMUSG00000002475	Abhd3
ENSMUSG00000044982	Sft2d3
ENSMUSG00000034748	Sirt6
ENSMUSG00000027378	Nphp1
ENSMUSG00000036721	Zscan12
ENSMUSG00000029060	Mib2
ENSMUSG00000030246	Ldhb
ENSMUSG00000071757	Zhx2
ENSMUSG00000014232	Cluap1
ENSMUSG00000031858	Mau2
ENSMUSG00000029397	Rchy1
ENSMUSG00000068015	Lrch1
ENSMUSG00000038437	Mllt6
ENSMUSG00000041477	Dcp1b
ENSMUSG00000020770	Unk
ENSMUSG00000028367	Txn1
ENSMUSG00000022801	Lrch3
ENSMUSG00000020287	Mpg
ENSMUSG00000015697	Setdb1
ENSMUSG00000035473	Galm
ENSMUSG00000044617	Zbtb39
ENSMUSG00000002028	Kmt2a
ENSMUSG00000039357	Fut11
ENSMUSG00000022885	St6gal1
ENSMUSG00000019088	Dnase1l1
ENSMUSG00000022983	Scaf4
ENSMUSG00000043411	Usp48
ENSMUSG00000044950	Pwwp2a
ENSMUSG00000010047	Hyal2
ENSMUSG00000030811	Fbxl19
ENSMUSG00000058761	Rnf169
ENSMUSG00000029313	Aff1
ENSMUSG00000019943	Atp2b1
ENSMUSG00000048271	Rbm33
ENSMUSG00000020520	Galnt10
ENSMUSG00000037773	Pced1a
ENSMUSG00000055065	Ddx17
ENSMUSG00000041187	Prkd2
ENSMUSG00000055725	Paqr3
ENSMUSG00000029710	Ephb4
ENSMUSG00000029004	Kmt2e
ENSMUSG00000052794	1700030K09Rik
ENSMUSG00000032405	Pias1
ENSMUSG00000028517	Ppap2b
ENSMUSG00000034083	Ccdc174
ENSMUSG00000070420	Zscan25
ENSMUSG00000005442	Cic
ENSMUSG00000016128	Stard13
ENSMUSG00000027495	Fam210b
ENSMUSG00000068917	Clk2
ENSMUSG00000025737	Wdr24
ENSMUSG00000003154	Foxj2
ENSMUSG00000025169	Ogfod3
ENSMUSG00000059273	Zc3h4
ENSMUSG00000024833	Pola2
ENSMUSG00000031540	Kat6a
ENSMUSG00000031732	Phlpp2
ENSMUSG00000058446	Znrf2
ENSMUSG00000034445	Cyb561a3
ENSMUSG00000053907	Mat2a
ENSMUSG00000031134	Rbmx
ENSMUSG00000026176	Ctdsp1
ENSMUSG00000020432	Tcn2
ENSMUSG00000057367	Birc2
ENSMUSG00000028385	Snx30
ENSMUSG00000036840	Siah1a
ENSMUSG00000062116	Zfp954
ENSMUSG00000059475	Zfp426
ENSMUSG00000024855	Pacs1
ENSMUSG00000071477	Zfp777
ENSMUSG00000020696	Rffl
ENSMUSG00000022999	Lmbr1l
ENSMUSG00000021756	Il6st
ENSMUSG00000027011	Ube2e3
ENSMUSG00000001280	Sp1
ENSMUSG00000051451	Crebzf
ENSMUSG00000025026	Add3
ENSMUSG00000061410	Zcchc14
ENSMUSG00000039477	Tnrc18
ENSMUSG00000087385	AA415398
ENSMUSG00000031015	Swap70
ENSMUSG00000039849	Pcif1
ENSMUSG00000022433	Csnk1e
ENSMUSG00000061028	Clasrp
ENSMUSG00000030094	Xpc
ENSMUSG00000024949	Sf1
ENSMUSG00000018398	Sept8
ENSMUSG00000007836	Hnrnpa0
ENSMUSG00000026113	Inpp4a
ENSMUSG00000045795	Whamm
ENSMUSG00000037552	Plekhg2
ENSMUSG00000054387	Mdm4
ENSMUSG00000020580	Rock2
ENSMUSG00000037791	Phf12
ENSMUSG00000030678	Maz
ENSMUSG00000007670	Khsrp
ENSMUSG00000045482	Trrap
ENSMUSG00000042308	Setd1a
ENSMUSG00000026987	Baz2b
ENSMUSG00000047603	Zfp235
ENSMUSG00000055897	Ppp4r1l-ps
ENSMUSG00000052423	B4galt3
ENSMUSG00000059851	Suv420h2
ENSMUSG00000047153	Khnyn
ENSMUSG00000030987	Stim1
ENSMUSG00000038481	Cdk19
ENSMUSG00000020097	Sgpl1
ENSMUSG00000038861	Pi4kb
ENSMUSG00000078429	Ctdsp2
ENSMUSG00000007038	Neu1
ENSMUSG00000027936	Crtc2
ENSMUSG00000001151	Pcnt
ENSMUSG00000034429	Zfp707
ENSMUSG00000032316	Clk3
ENSMUSG00000031627	Irf2
ENSMUSG00000038517	Tbkbp1
ENSMUSG00000040712	Camta2
ENSMUSG00000001632	Brpf1
ENSMUSG00000035051	Dhx57
ENSMUSG00000078485	Plekhn1
ENSMUSG00000062232	Rapgef2
ENSMUSG00000064138	Fam172a
ENSMUSG00000039308	Ndst2
ENSMUSG00000026082	Rev1
ENSMUSG00000041215	Yeats2
ENSMUSG00000049091	Sephs2
ENSMUSG00000062822	4833420G17Rik
ENSMUSG00000074405	Zfp865
ENSMUSG00000043923	Ccdc84
ENSMUSG00000060601	Nr1h2
ENSMUSG00000032594	Ip6k1
ENSMUSG00000065954	Tacc1
ENSMUSG00000043059	Zfp513
ENSMUSG00000033159	Cnppd1
ENSMUSG00000022089	Bin3
ENSMUSG00000005682	Pan2
ENSMUSG00000003344	Btbd2
ENSMUSG00000049800	Sertad2
ENSMUSG00000039852	Rere
ENSMUSG00000059772	Slx1b
ENSMUSG00000024045	Akap8
ENSMUSG00000036941	Elac1
ENSMUSG00000035944	Ttc38
ENSMUSG00000001143	Lman2l
ENSMUSG00000062519	Zfp398
ENSMUSG00000034422	Parp14
ENSMUSG00000052915	Msl1
ENSMUSG00000028809	Srrm1
ENSMUSG00000053644	Aldh7a1
ENSMUSG00000016559	H3f3b
ENSMUSG00000036561	Ppp6r2
ENSMUSG00000005621	Zfp592
ENSMUSG00000021752	Kctd6
ENSMUSG00000035649	Zcchc7
ENSMUSG00000038371	Sbf2
ENSMUSG00000041560	Gltscr2
ENSMUSG00000001082	Mfsd10
ENSMUSG00000010067	Rassf1
ENSMUSG00000010453	Kansl3
ENSMUSG00000020400	Tnip1
ENSMUSG00000031154	Otud5
ENSMUSG00000043909	Trp53bp1
ENSMUSG00000028906	Epb4.1
ENSMUSG00000045639	Zfp629
ENSMUSG00000008200	Fnbp4
ENSMUSG00000023980	Taf8
ENSMUSG00000025369	Smarcc2
ENSMUSG00000027423	Snx5
ENSMUSG00000027207	Galk2
ENSMUSG00000054199	Gon4l
ENSMUSG00000032263	Bckdhb
ENSMUSG00000042423	Fbrs
ENSMUSG00000097290	1300002E11Rik
ENSMUSG00000046329	Slc25a23
ENSMUSG00000043090	Zfp866
ENSMUSG00000014554	Dguok
ENSMUSG00000053483	Usp21
ENSMUSG00000055923	Aasdh
ENSMUSG00000025575	Cant1
ENSMUSG00000033955	Tnks1bp1
ENSMUSG00000032580	Rbm5
ENSMUSG00000028405	Aco1
ENSMUSG00000031310	Zmym3
ENSMUSG00000029470	P2rx4
ENSMUSG00000058240	Cryzl1
ENSMUSG00000005951	Shpk
ENSMUSG00000025217	Btrc
ENSMUSG00000035401	2210018M11Rik
ENSMUSG00000037221	Mospd3
ENSMUSG00000020752	Recql5
ENSMUSG00000029427	Zcchc8
ENSMUSG00000037697	Ddhd1
ENSMUSG00000047098	Rnf31
ENSMUSG00000045867	Cradd
ENSMUSG00000031921	Terf2
ENSMUSG00000061838	Suclg2
ENSMUSG00000001786	Fbxo7
ENSMUSG00000024948	Map4k2
ENSMUSG00000038991	Txndc5
ENSMUSG00000032737	Inppl1
ENSMUSG00000047264	Zfp358
ENSMUSG00000062761	Zfp512
ENSMUSG00000049076	Acap2
ENSMUSG00000024969	Mark2
ENSMUSG00000022521	Crebbp
ENSMUSG00000020868	Xylt2
ENSMUSG00000033712	Ccar2
ENSMUSG00000026687	Aldh9a1
ENSMUSG00000018882	Mrpl45
ENSMUSG00000058440	Nrf1
ENSMUSG00000021585	Cast
ENSMUSG00000036339	Tmem260
ENSMUSG00000024240	Epc1
ENSMUSG00000038072	Galnt11
ENSMUSG00000006418	Rnf114
ENSMUSG00000034543	Morc2a
ENSMUSG00000049339	Fam134a
ENSMUSG00000051675	Trim32
ENSMUSG00000035596	Mboat7
ENSMUSG00000024188	Luc7l
ENSMUSG00000003184	Irf3
ENSMUSG00000049305	Ccdc71
ENSMUSG00000040771	Oard1
ENSMUSG00000035011	Zbtb7a
ENSMUSG00000024645	Timm21
ENSMUSG00000062729	Ppox
ENSMUSG00000069633	Pex11g
ENSMUSG00000061731	Ext1
ENSMUSG00000035376	Ptplb
ENSMUSG00000042207	Kdm5b
ENSMUSG00000037553	Zdhhc18
ENSMUSG00000018449	Rpain
ENSMUSG00000019432	Ddx39b
ENSMUSG00000015869	Prpsap1
ENSMUSG00000089917	Uckl1
ENSMUSG00000011832	Evi5l
ENSMUSG00000029826	Zc3hav1
ENSMUSG00000040859	Bsdc1
ENSMUSG00000032637	Atxn2l
ENSMUSG00000046574	Prr12
ENSMUSG00000042626	Shc1
ENSMUSG00000009995	Taz
ENSMUSG00000035632	Cnot3
ENSMUSG00000029076	Sdf4
ENSMUSG00000021891	Mettl6
ENSMUSG00000042903	Foxo4
ENSMUSG00000063511	Snrnp70
ENSMUSG00000026342	Slc35f5
ENSMUSG00000028293	Slc35a1
ENSMUSG00000038520	Tbc1d17
ENSMUSG00000024947	Men1
ENSMUSG00000044465	Fam160a2
ENSMUSG00000029439	Sfswap
ENSMUSG00000001441	Npepps
ENSMUSG00000057229	Atp5sl
ENSMUSG00000014763	Fam120b
ENSMUSG00000030822	Prr14
ENSMUSG00000029028	Lrrc47
ENSMUSG00000042557	Sin3a
ENSMUSG00000038507	Parp12
ENSMUSG00000020919	Stat5b
ENSMUSG00000024400	Wdr33
ENSMUSG00000027522	Stx16
ENSMUSG00000040365	Trim41
ENSMUSG00000058318	Phf21a
ENSMUSG00000042211	Fbxo38
ENSMUSG00000040720	1110037F02Rik
ENSMUSG00000015120	Ube2i
ENSMUSG00000032329	Hmg20a
ENSMUSG00000034820	Cpsf7
ENSMUSG00000028878	Fam76a
ENSMUSG00000058655	Eif4b
ENSMUSG00000036099	Vezt
ENSMUSG00000054611	Kdm2a
ENSMUSG00000043279	Trim56
ENSMUSG00000035392	Dennd1a
ENSMUSG00000071646	Mta2
ENSMUSG00000026554	Dcaf8
ENSMUSG00000022185	Acin1
ENSMUSG00000053286	Trmt1l
ENSMUSG00000015889	Lta4h
ENSMUSG00000021540	Smad5
ENSMUSG00000027194	Ttc17
ENSMUSG00000057236	Rbbp4
ENSMUSG00000048170	Mcmbp
ENSMUSG00000028759	Hp1bp3

## Sheet: Fig3A_edgeR_gKO_all_genes
GENEID	SYMBOL	logFC	logCPM	F	PValue	FDR
ENSMUSG00000039982	Dtx4	1.94326	4.86292	223.966	6.95e-19	1.24e-14
ENSMUSG00000056749	Nfil3	2.76603	5.23055	216.032	1.4e-18	1.25e-14
ENSMUSG00000055116	Arntl	2.62099	3.59238	188.319	1.63e-17	9.75e-14
ENSMUSG00000029195	Klb	1.50304	5.04676	162.647	2.18e-16	9.77e-13
ENSMUSG00000058756	Thra	-1.22086	5.62097	154.901	5.09e-16	1.82e-12
ENSMUSG00000042487	Leo1	1.23969	4.20439	139.411	3.07e-15	9.15e-12
ENSMUSG00000026227	2810459M11Rik	-3.27808	5.58572	138.649	4.88e-15	1.25e-11
ENSMUSG00000020889	Nr1d1	-1.85783	8.34086	119.047	4.18e-14	9.34e-11
ENSMUSG00000028420	Tmem38b	1.31116	5.546	113.534	8.97e-14	1.78e-10
ENSMUSG00000030737	Slco2b1	-1.59375	7.58157	103.433	3.91e-13	6.6e-10
ENSMUSG00000030878	Cdr2	1.66047	5.53269	103.183	4.06e-13	6.6e-10
ENSMUSG00000004098	Col5a3	2.27489	9.66662	100.833	5.8e-13	8.65e-10
ENSMUSG00000026672	Optn	1.28348	6.60629	99.4777	7.15e-13	9.83e-10
ENSMUSG00000025185	Loxl4	2.3085	2.40583	98.6109	8.18e-13	1.04e-09
ENSMUSG00000066364	Serpina3b	-3.19559	1.34649	95.3867	1.36e-12	1.62e-09
ENSMUSG00000021591	Glrx	1.23454	5.02854	92.8155	2.06e-12	2.3e-09
ENSMUSG00000053641	Dennd4a	1.35776	4.62817	89.5527	3.52e-12	3.7e-09
ENSMUSG00000041852	Tcf20	0.936637	5.03226	88.7211	4.04e-12	4.02e-09
ENSMUSG00000034424	Gcsh	0.911938	6.64923	86.9555	5.45e-12	5.13e-09
ENSMUSG00000032841	Prr5l	-1.70382	2.55497	85.7045	6.75e-12	6.03e-09
ENSMUSG00000097440	Gm6277	1.9218	2.75243	83.5637	9.77e-12	8.32e-09
ENSMUSG00000001119	Col6a1	1.90475	9.04588	82.762	1.12e-11	9.13e-09
ENSMUSG00000052396	Mogat2	5.23173	4.34397	86.1481	1.17e-11	9.13e-09
ENSMUSG00000030972	Acsm5	-1.84298	6.70349	82.7122	1.23e-11	9.16e-09
ENSMUSG00000049313	Sorl1	3.17877	4.69589	83.8901	1.46e-11	1.04e-08
ENSMUSG00000045094	Arhgef37	2.24569	3.00086	80.31	1.74e-11	1.19e-08
ENSMUSG00000040035	Disp2	-2.37939	2.52101	78.6383	2.35e-11	1.45e-08
ENSMUSG00000041078	Grid1	4.25126	1.4886	79.0936	2.18e-11	1.45e-08
ENSMUSG00000056413	Adap1	2.37975	4.83703	80.3977	2.31e-11	1.45e-08
ENSMUSG00000022265	Ank	1.28216	5.39388	77.6754	2.8e-11	1.64e-08
ENSMUSG00000025795	Rassf3	1.86218	6.70709	78.3104	2.83e-11	1.64e-08
ENSMUSG00000020591	Ntsr2	2.40648	2.85135	83.6901	2.95e-11	1.65e-08
ENSMUSG00000057963	Itpk1	1.86737	5.64974	78.078	3.06e-11	1.66e-08
ENSMUSG00000037493	Cib2	1.58156	6.58969	76.7191	3.41e-11	1.8e-08
ENSMUSG00000023075	Akirin1	0.893587	5.19699	75.392	4.27e-11	2.18e-08
ENSMUSG00000034194	R3hcc1	1.02242	4.61598	75.1128	4.5e-11	2.23e-08
ENSMUSG00000000753	Serpinf1	1.46031	9.41487	74.8186	4.75e-11	2.3e-08
ENSMUSG00000022546	Gpt	1.59826	8.60264	73.9581	5.59e-11	2.63e-08
ENSMUSG00000031661	Nkd1	1.73719	4.403	74.0497	5.81e-11	2.67e-08
ENSMUSG00000031924	Cyb5b	1.81084	8.94334	73.4496	6.16e-11	2.75e-08
ENSMUSG00000020241	Col6a2	2.01502	8.97333	73.3031	6.33e-11	2.76e-08
ENSMUSG00000021136	Smoc1	-1.10389	7.89119	71.4918	8.95e-11	3.81e-08
ENSMUSG00000039126	Prune2	3.87623	3.04756	72.3806	1.05e-10	4.35e-08
ENSMUSG00000046794	Ppp1r3b	2.35129	7.74488	70.6036	1.31e-10	5.3e-08
ENSMUSG00000085180	AI838599	-2.49881	1.62105	69.4478	1.33e-10	5.3e-08
ENSMUSG00000033530	Ttc7b	1.01378	5.96801	68.8985	1.49e-10	5.78e-08
ENSMUSG00000001420	Tmem79	2.6421	3.52658	69.4952	1.65e-10	6.26e-08
ENSMUSG00000085519	Gm13703	5.02093	2.22447	73.8703	2.14e-10	7.98e-08
ENSMUSG00000020277	Pfkl	1.1096	6.77816	66.2176	2.54e-10	9.23e-08
ENSMUSG00000037366	Pafah2	1.02217	6.65446	66.1404	2.58e-10	9.23e-08
ENSMUSG00000024404	Riok3	0.583188	6.40682	65.082	3.2e-10	1.1e-07
ENSMUSG00000062785	Kcnc3	-1.5232	4.0283	65.1223	3.18e-10	1.1e-07
ENSMUSG00000027099	Mtx2	0.714901	5.47352	64.8837	3.34e-10	1.13e-07
ENSMUSG00000032038	St3gal4	-1.00508	5.99517	64.7632	3.42e-10	1.13e-07
ENSMUSG00000024371	C2	-1.76205	4.69445	65.0948	3.57e-10	1.16e-07
ENSMUSG00000032060	Cryab	1.59641	6.15546	64.8745	3.71e-10	1.19e-07
ENSMUSG00000006818	Sod2	0.987112	7.50434	63.9766	4.02e-10	1.25e-07
ENSMUSG00000021814	Anxa7	0.647452	7.27349	63.9222	4.07e-10	1.25e-07
ENSMUSG00000002341	Ncan	4.43174	2.7108	76.208	5.12e-10	1.5e-07
ENSMUSG00000004383	Large	0.971558	4.15423	62.9505	4.98e-10	1.5e-07
ENSMUSG00000023861	Mpc1	1.29723	6.97934	62.9088	5.02e-10	1.5e-07
ENSMUSG00000021069	Pygl	1.44537	8.89005	62.1616	5.87e-10	1.67e-07
ENSMUSG00000032026	Rexo2	1.05082	6.29054	62.1857	5.84e-10	1.67e-07
ENSMUSG00000039958	Mettl20	-1.08824	5.31011	61.905	6.2e-10	1.73e-07
ENSMUSG00000026621	Marc1	2.60544	8.35636	61.7987	7.88e-10	2.13e-07
ENSMUSG00000027806	Tsc22d2	1.41999	4.93279	60.9307	7.76e-10	2.13e-07
ENSMUSG00000020059	Sycp3	4.09282	2.76906	66.1866	8.65e-10	2.31e-07
ENSMUSG00000020864	Ankrd40	0.733931	6.85988	60.1339	9.03e-10	2.38e-07
ENSMUSG00000018983	E2f2	1.88795	2.05635	59.4237	1.05e-09	2.69e-07
ENSMUSG00000039680	Mrps6	1.25432	5.22081	59.4824	1.04e-09	2.69e-07
ENSMUSG00000029430	Ran	1.04427	6.42539	59.1054	1.13e-09	2.76e-07
ENSMUSG00000038793	Lefty1	2.25787	1.44556	59.1506	1.12e-09	2.76e-07
ENSMUSG00000049265	Kcnk3	2.29591	4.6482	60.4092	1.11e-09	2.76e-07
ENSMUSG00000030835	Nomo1	1.09483	6.8069	59.0128	1.15e-09	2.78e-07
ENSMUSG00000059920	4930453N24Rik	0.618897	4.64476	58.9183	1.17e-09	2.8e-07
ENSMUSG00000062070	Pgk1	0.800192	7.02108	58.865	1.19e-09	2.8e-07
ENSMUSG00000032905	Atg12	0.735897	5.24988	58.4639	1.3e-09	2.97e-07
ENSMUSG00000050069	Grem2	-3.57465	3.70655	60.123	1.28e-09	2.97e-07
ENSMUSG00000028024	Enpep	1.97254	6.81163	59.0512	1.4e-09	3.08e-07
ENSMUSG00000030986	Dhx32	1.11674	5.78944	58.2393	1.36e-09	3.08e-07
ENSMUSG00000050556	Kcnb1	1.26892	4.72051	58.1273	1.4e-09	3.08e-07
ENSMUSG00000041390	Mdfic	0.791531	4.69423	58.0569	1.42e-09	3.09e-07
ENSMUSG00000026701	Prdx6	0.874247	9.17571	57.3513	1.66e-09	3.57e-07
ENSMUSG00000020029	Nudt4	0.742218	7.41262	56.8885	1.83e-09	3.81e-07
ENSMUSG00000039349	C130074G19Rik	1.22536	8.42599	56.9899	1.79e-09	3.81e-07
ENSMUSG00000059248	Sept9	1.23853	6.72832	56.9404	1.81e-09	3.81e-07
ENSMUSG00000031938	4931406C07Rik	1.08213	7.88401	56.6215	1.95e-09	4e-07
ENSMUSG00000019814	Ltv1	0.786769	4.58986	56.1289	2.17e-09	4.41e-07
ENSMUSG00000028179	Cth	1.33811	7.66901	56.0295	2.22e-09	4.41e-07
ENSMUSG00000032279	Idh3a	1.006	6.76326	56.0511	2.21e-09	4.41e-07
ENSMUSG00000031708	Tecr	1.3043	8.22562	55.9294	2.27e-09	4.46e-07
ENSMUSG00000030930	Chst15	-1.05083	4.48428	55.868	2.3e-09	4.48e-07
ENSMUSG00000026608	Kctd3	0.821672	4.95475	55.5833	2.45e-09	4.72e-07
ENSMUSG00000021748	Pdhb	1.13954	7.35872	55.1505	2.71e-09	5.1e-07
ENSMUSG00000053080	2700081O15Rik	-0.619186	5.06486	55.1422	2.71e-09	5.1e-07
ENSMUSG00000038683	Pak1ip1	0.839204	5.45975	54.9367	2.84e-09	5.29e-07
ENSMUSG00000026568	Mpc2	1.23496	7.21669	54.7523	2.96e-09	5.4e-07
ENSMUSG00000031137	Fgf13	3.47371	3.29214	59.9473	2.94e-09	5.4e-07
ENSMUSG00000027282	Mtch2	0.72031	7.4747	54.549	3.1e-09	5.6e-07
ENSMUSG00000028793	Rnf19b	-0.500211	5.45644	54.3829	3.22e-09	5.76e-07
ENSMUSG00000010663	Fads1	-1.227	9.08481	53.9846	3.53e-09	6.06e-07
ENSMUSG00000028007	Snx7	1.03231	4.38676	54.0031	3.51e-09	6.06e-07
ENSMUSG00000038403	Hfe2	3.32738	6.07259	55.2889	3.45e-09	6.06e-07
ENSMUSG00000062580	Timm17a	0.743001	5.49255	54.0146	3.5e-09	6.06e-07
ENSMUSG00000074582	Arfgef2	0.447742	5.60985	53.786	3.69e-09	6.29e-07
ENSMUSG00000031349	Nsdhl	1.82874	6.59284	54.4492	3.79e-09	6.4e-07
ENSMUSG00000021957	Tkt	1.79845	9.42973	53.4439	3.99e-09	6.67e-07
ENSMUSG00000024747	Aldh1a7	1.35323	7.94687	53.3653	4.06e-09	6.73e-07
ENSMUSG00000027605	Acss2	3.17083	8.6866	54.385	4.22e-09	6.87e-07
ENSMUSG00000086546	Gm13709	4.73347	-0.10699	61.0773	4.23e-09	6.87e-07
ENSMUSG00000002058	Unc119	1.53398	5.52836	53.2031	4.69e-09	7.5e-07
ENSMUSG00000026189	Pecr	0.738413	7.09222	52.7506	4.68e-09	7.5e-07
ENSMUSG00000004105	Angptl2	-0.949411	6.6639	52.6759	4.77e-09	7.54e-07
ENSMUSG00000024777	Ppp2r5b	1.60281	5.34629	52.9	5.14e-09	8.06e-07
ENSMUSG00000035764	Fbxo45	-0.885346	4.66282	51.8782	5.74e-09	8.92e-07
ENSMUSG00000020116	Pno1	1.0034	4.76249	51.7028	5.98e-09	9.22e-07
ENSMUSG00000098234	Snhg6	1.50894	3.18527	51.5612	6.18e-09	9.45e-07
ENSMUSG00000028251	Tstd3	1.30018	4.27867	51.3748	6.46e-09	9.78e-07
ENSMUSG00000025876	Unc5a	1.88573	5.07437	52.0958	6.65e-09	9.99e-07
ENSMUSG00000024782	Ak3	0.61378	8.46853	51.0763	6.93e-09	1.01e-06
ENSMUSG00000049327	Setd8	1.32174	6.15794	51.2803	6.95e-09	1.01e-06
ENSMUSG00000068742	Cry2	0.568471	6.58182	51.0459	6.98e-09	1.01e-06
ENSMUSG00000091498	Mpc1-ps	1.2017	4.496	51.0299	7e-09	1.01e-06
ENSMUSG00000091575	2010016I18Rik	-2.27538	4.63947	52.2156	6.79e-09	1.01e-06
ENSMUSG00000033105	Lss	2.45176	6.06426	52.2049	7.13e-09	1.02e-06
ENSMUSG00000035835	BC005764	-1.53668	3.45112	50.8711	7.27e-09	1.03e-06
ENSMUSG00000024985	Tcf7l2	-0.818153	4.26482	50.6141	7.73e-09	1.08e-06
ENSMUSG00000057561	Eif1a	0.969651	5.48821	50.6257	7.7e-09	1.08e-06
ENSMUSG00000027131	Emc4	0.603224	5.46198	50.2777	8.37e-09	1.14e-06
ENSMUSG00000030615	Tmem126a	0.784412	4.38732	50.2773	8.37e-09	1.14e-06
ENSMUSG00000073680	Tmem88b	-1.33908	3.46372	50.2997	8.32e-09	1.14e-06
ENSMUSG00000022425	Enpp2	-1.07712	7.16888	50.1173	8.69e-09	1.15e-06
ENSMUSG00000025937	Lactb2	1.50099	7.6683	50.342	8.46e-09	1.15e-06
ENSMUSG00000034780	B3galt1	2.72863	3.7094	50.7558	8.74e-09	1.15e-06
ENSMUSG00000038217	Tlcd2	2.38783	6.55145	51.2709	8.68e-09	1.15e-06
ENSMUSG00000056952	Tatdn2	0.79585	5.40911	50.1306	8.67e-09	1.15e-06
ENSMUSG00000012422	Tmem167	0.766557	4.94996	49.8852	9.19e-09	1.2e-06
ENSMUSG00000042709	Atpaf2	0.850626	5.48265	49.8154	9.34e-09	1.21e-06
ENSMUSG00000089774	Slc5a3	1.29767	4.60265	49.3664	1.05e-08	1.35e-06
ENSMUSG00000032294	Pkm	1.31555	7.76561	48.8427	1.18e-08	1.51e-06
ENSMUSG00000001052	Sec24b	-0.528829	5.41715	48.7527	1.21e-08	1.53e-06
ENSMUSG00000004270	Lpcat3	0.906625	7.15928	48.7111	1.22e-08	1.53e-06
ENSMUSG00000092203	1110038B12Rik	1.00967	3.82919	48.6386	1.24e-08	1.55e-06
ENSMUSG00000038290	Smg6	-0.592877	5.32895	48.4231	1.31e-08	1.62e-06
ENSMUSG00000006412	Pfdn2	0.529981	5.38353	48.2939	1.35e-08	1.63e-06
ENSMUSG00000010936	Vac14	1.104	5.8452	48.3381	1.33e-08	1.63e-06
ENSMUSG00000029238	Clock	0.89455	4.679	48.3106	1.34e-08	1.63e-06
ENSMUSG00000072235	Tuba1a	2.37572	8.82221	48.9474	1.35e-08	1.63e-06
ENSMUSG00000063694	Cycs	0.86041	6.41403	48.1835	1.38e-08	1.66e-06
ENSMUSG00000019528	Gyg	0.91452	5.21115	48.0682	1.42e-08	1.7e-06
ENSMUSG00000031790	Mmp15	0.982267	6.00914	47.8701	1.49e-08	1.77e-06
ENSMUSG00000028076	Cd1d1	0.888276	8.39233	47.6735	1.57e-08	1.78e-06
ENSMUSG00000031725	Ces1f	-1.61844	8.56101	47.7057	1.57e-08	1.78e-06
ENSMUSG00000038914	Dido1	-0.786008	5.76801	47.6772	1.57e-08	1.78e-06
ENSMUSG00000047822	Gm6484	3.85778	4.98069	49.1764	1.53e-08	1.78e-06
ENSMUSG00000058056	Palld	1.17628	5.68101	47.6796	1.57e-08	1.78e-06
ENSMUSG00000063888	Rpl7l1	0.601015	5.97771	47.7845	1.53e-08	1.78e-06
ENSMUSG00000064225	Paqr9	2.11542	7.96061	48.1459	1.64e-08	1.85e-06
ENSMUSG00000025917	Cops5	0.50621	5.82662	47.4115	1.67e-08	1.86e-06
ENSMUSG00000034024	Cct2	0.502034	6.99243	47.4292	1.67e-08	1.86e-06
ENSMUSG00000020264	Slc36a2	1.68416	6.57398	47.7483	1.79e-08	1.96e-06
ENSMUSG00000055407	Map6	1.72349	3.92078	47.5484	1.79e-08	1.96e-06
ENSMUSG00000038633	Degs1	0.918463	6.88516	47.0413	1.83e-08	1.98e-06
ENSMUSG00000070002	Ell	-0.641944	5.73057	47.0355	1.83e-08	1.98e-06
ENSMUSG00000074063	Osgin1	2.20463	7.56921	47.8641	1.82e-08	1.98e-06
ENSMUSG00000023456	Tpi1	1.15591	8.97954	46.8687	1.91e-08	2.05e-06
ENSMUSG00000041135	Ripk2	0.821363	3.65269	46.8372	1.93e-08	2.05e-06
ENSMUSG00000060459	Kng2	2.78714	7.3709	47.7075	1.95e-08	2.06e-06
ENSMUSG00000031985	Gnpat	0.535447	7.12343	46.7068	1.99e-08	2.08e-06
ENSMUSG00000041220	Elovl6	3.79557	7.47298	48.076	1.98e-08	2.08e-06
ENSMUSG00000031660	Brd7	0.488317	5.50606	46.6254	2.03e-08	2.11e-06
ENSMUSG00000026558	Uck2	0.764281	4.26471	46.5192	2.08e-08	2.15e-06
ENSMUSG00000035834	Polr3g	1.51216	3.05422	46.4656	2.11e-08	2.17e-06
ENSMUSG00000030695	Aldoa	1.52895	10.0857	46.3542	2.17e-08	2.22e-06
ENSMUSG00000015668	Pdzd11	0.697928	4.57231	46.2928	2.2e-08	2.24e-06
ENSMUSG00000001700	Gramd3	1.08263	5.14181	46.2229	2.24e-08	2.27e-06
ENSMUSG00000020829	Slc46a1	0.833658	5.42959	46.0773	2.33e-08	2.3e-06
ENSMUSG00000020846	Fam101b	1.02142	6.03495	46.1092	2.31e-08	2.3e-06
ENSMUSG00000031434	Morc4	1.53562	4.86845	46.5434	2.31e-08	2.3e-06
ENSMUSG00000032902	Slc16a1	1.28291	5.48364	46.3046	2.29e-08	2.3e-06
ENSMUSG00000013833	Med16	0.783537	5.20086	45.9804	2.38e-08	2.33e-06
ENSMUSG00000020010	Vnn3	-1.62962	5.79451	46.5705	2.37e-08	2.33e-06
ENSMUSG00000021497	Txndc15	0.503432	6.33727	45.9052	2.43e-08	2.35e-06
ENSMUSG00000040016	Ptger3	1.74262	4.66374	46.5039	2.43e-08	2.35e-06
ENSMUSG00000022035	Ccdc25	0.558945	5.26648	45.8499	2.46e-08	2.37e-06
ENSMUSG00000013701	Timm23	0.768603	5.44806	45.6673	2.58e-08	2.45e-06
ENSMUSG00000069300	Hist1h2bj	4.11191	-1.48395	45.6866	2.56e-08	2.45e-06
ENSMUSG00000022110	Sucla2	0.638713	7.0753	45.6198	2.61e-08	2.47e-06
ENSMUSG00000026833	Olfm1	1.43602	5.70905	45.8772	2.69e-08	2.54e-06
ENSMUSG00000046027	Stard5	0.602166	6.8576	45.4043	2.75e-08	2.58e-06
ENSMUSG00000024410	3110002H16Rik	0.58419	5.14041	45.1605	2.93e-08	2.73e-06
ENSMUSG00000021772	Nkiras1	0.618853	4.55685	45.0787	2.99e-08	2.77e-06
ENSMUSG00000057666	Gapdh	1.33474	10.2853	45.01	3.04e-08	2.79e-06
ENSMUSG00000058704	Memo1	0.859039	4.47184	45.0101	3.04e-08	2.79e-06
ENSMUSG00000022419	Deptor	1.29838	6.89025	45.0674	3.1e-08	2.8e-06
ENSMUSG00000034522	Zfp395	-0.944713	5.972	44.9397	3.09e-08	2.8e-06
ENSMUSG00000036913	Trim67	1.56612	2.94414	44.9349	3.1e-08	2.8e-06
ENSMUSG00000021477	Ctsl	0.883043	9.45124	44.7882	3.22e-08	2.87e-06
ENSMUSG00000032459	Mrps22	1.12673	4.23906	44.7582	3.24e-08	2.87e-06
ENSMUSG00000039910	Cited2	-1.24755	4.83163	44.8144	3.26e-08	2.87e-06
ENSMUSG00000045667	Smtnl2	2.44385	2.60492	45.0467	3.25e-08	2.87e-06
ENSMUSG00000059447	Hadhb	0.671031	7.07546	44.7962	3.21e-08	2.87e-06
ENSMUSG00000003528	Slc25a1	1.66422	8.97775	44.6292	3.38e-08	2.95e-06
ENSMUSG00000026062	Slc9a2	2.5387	-0.0238454	46.9714	3.38e-08	2.95e-06
ENSMUSG00000039428	Tmem135	1.03183	6.94907	44.2121	3.72e-08	3.23e-06
ENSMUSG00000030123	Plxnd1	0.946537	6.57329	44.1714	3.76e-08	3.25e-06
ENSMUSG00000097286	Gm26684	-1.46505	2.26121	44.1108	3.82e-08	3.28e-06
ENSMUSG00000023031	Cela1	2.06352	4.44485	44.7785	3.9e-08	3.34e-06
ENSMUSG00000020402	Vdac1	0.586404	7.80374	43.9807	3.95e-08	3.35e-06
ENSMUSG00000040339	Fam102b	-1.04342	4.61114	43.994	3.94e-08	3.35e-06
ENSMUSG00000025477	Inpp5a	0.738318	5.60369	43.8384	4.09e-08	3.42e-06
ENSMUSG00000037266	D4Wsu53e	-0.666239	8.61261	43.8636	4.07e-08	3.42e-06
ENSMUSG00000026755	Arpc5l	0.465588	5.27971	43.7281	4.21e-08	3.5e-06
ENSMUSG00000030806	Stx1b	-1.31206	4.49739	43.6996	4.38e-08	3.63e-06
ENSMUSG00000034673	Pbx2	-0.546055	5.1268	43.3383	4.66e-08	3.84e-06
ENSMUSG00000070315	4930581F22Rik	-0.874317	4.39618	43.3001	4.7e-08	3.86e-06
ENSMUSG00000000563	Atp5f1	0.562965	8.07357	43.1311	4.91e-08	4.01e-06
ENSMUSG00000052712	BC004004	0.577078	6.60406	43.0979	4.95e-08	4.03e-06
ENSMUSG00000063524	Eno1	1.13141	9.03341	43.0801	4.98e-08	4.03e-06
ENSMUSG00000020744	Slc25a19	0.947413	5.94702	42.9847	5.1e-08	4.11e-06
ENSMUSG00000022762	Ncam2	-2.79131	0.278191	42.8527	5.28e-08	4.21e-06
ENSMUSG00000021196	Pfkp	1.26882	5.29784	42.9616	5.4e-08	4.27e-06
ENSMUSG00000048040	Arxes2	-1.163	4.21928	42.707	5.48e-08	4.32e-06
ENSMUSG00000022707	Gbe1	1.18046	6.78792	42.6531	5.6e-08	4.35e-06
ENSMUSG00000027746	Ufm1	0.611517	5.40958	42.639	5.58e-08	4.35e-06
ENSMUSG00000032418	Me1	2.64106	9.18819	43.2614	5.62e-08	4.35e-06
ENSMUSG00000032492	Pth1r	1.54256	4.39267	43.006	5.55e-08	4.35e-06
ENSMUSG00000017801	Mlx	0.775138	4.9699	42.4103	5.92e-08	4.54e-06
ENSMUSG00000026926	Pmpca	0.435075	6.32353	42.4118	5.92e-08	4.54e-06
ENSMUSG00000021062	Rab15	-2.75775	2.14898	42.5919	6.04e-08	4.59e-06
ENSMUSG00000027678	Ncoa3	-0.557682	4.76304	42.3399	6.03e-08	4.59e-06
ENSMUSG00000032024	Clmp	1.15775	4.73142	42.3369	6.05e-08	4.59e-06
ENSMUSG00000033658	Ddx19b	-0.754556	4.24282	42.3064	6.08e-08	4.59e-06
ENSMUSG00000021116	Eif2s1	0.626938	5.27215	42.1867	6.27e-08	4.66e-06
ENSMUSG00000021917	Spcs1	0.478316	5.96004	42.2085	6.24e-08	4.66e-06
ENSMUSG00000030244	Gys2	2.64022	7.61272	43.0712	6.26e-08	4.66e-06
ENSMUSG00000092981	Mir5125	-0.919329	3.61118	42.2218	6.22e-08	4.66e-06
ENSMUSG00000006273	Atp6v1b2	0.629106	6.41998	42.0903	6.43e-08	4.74e-06
ENSMUSG00000031295	Phka2	-0.732789	5.6553	42.1057	6.41e-08	4.74e-06
ENSMUSG00000046079	Lrrc8d	0.855075	5.59349	42.036	6.53e-08	4.76e-06
ENSMUSG00000058454	Dhcr7	2.04172	6.52837	42.8196	6.51e-08	4.76e-06
ENSMUSG00000048442	Smim5	-2.58363	3.20615	42.5637	6.66e-08	4.83e-06
ENSMUSG00000071866	Ppia	0.586441	8.71281	41.9634	6.65e-08	4.83e-06
ENSMUSG00000031936	Hephl1	5.24557	1.44272	52.9749	6.91e-08	4.98e-06
ENSMUSG00000033400	Agl	0.760148	5.3722	41.7607	7.01e-08	5.04e-06
ENSMUSG00000024091	Vapa	0.515941	6.05185	41.7343	7.06e-08	5.05e-06
ENSMUSG00000020720	Psmd12	0.495035	6.21425	41.5974	7.32e-08	5.22e-06
ENSMUSG00000041025	Iffo2	0.664103	4.46634	41.5667	7.38e-08	5.23e-06
ENSMUSG00000064289	Tank	0.945327	4.54454	41.561	7.39e-08	5.23e-06
ENSMUSG00000039987	Phtf2	0.900868	2.84059	41.3891	7.73e-08	5.45e-06
ENSMUSG00000020457	Drg1	0.443518	5.6133	41.3498	7.82e-08	5.48e-06
ENSMUSG00000020361	Hspa4	0.531199	6.97211	41.2878	7.94e-08	5.53e-06
ENSMUSG00000027901	Dennd2d	-1.26674	4.2828	41.3448	7.93e-08	5.53e-06
ENSMUSG00000002017	Fam98a	0.625724	4.71941	41.1158	8.31e-08	5.75e-06
ENSMUSG00000016308	Ube2a	0.549662	4.49652	41.1065	8.33e-08	5.75e-06
ENSMUSG00000054434	Tmem120b	0.965419	6.21596	41.003	8.57e-08	5.89e-06
ENSMUSG00000014402	Tsg101	0.546499	5.53093	40.9511	8.68e-08	5.94e-06
ENSMUSG00000019373	Cops3	0.579244	5.51473	40.9455	8.7e-08	5.94e-06
ENSMUSG00000027195	Hsd17b12	0.994667	7.33106	40.8423	8.94e-08	6.08e-06
ENSMUSG00000038068	Rnf144b	-1.2922	5.42307	41.0463	8.98e-08	6.09e-06
ENSMUSG00000020917	Acly	3.1897	9.3028	41.5034	9.26e-08	6.25e-06
ENSMUSG00000029821	Dfna5	1.9616	2.78739	40.8001	9.33e-08	6.28e-06
ENSMUSG00000026670	Uap1	-0.695428	5.93123	40.6065	9.52e-08	6.37e-06
ENSMUSG00000000326	Comt	1.20886	9.63779	40.5354	9.7e-08	6.45e-06
ENSMUSG00000006611	Hfe	1.00871	6.47367	40.5181	9.74e-08	6.45e-06
ENSMUSG00000027074	Slc43a3	-0.630701	6.32325	40.5214	9.73e-08	6.45e-06
ENSMUSG00000027944	Hax1	0.57337	5.51691	40.4755	9.85e-08	6.5e-06
ENSMUSG00000041650	Pcca	0.594964	6.9243	40.3637	1.02e-07	6.67e-06
ENSMUSG00000024480	Ap3s1	0.787326	5.10057	40.3275	1.03e-07	6.69e-06
ENSMUSG00000025875	Tspan17	1.07435	5.63513	40.3514	1.02e-07	6.69e-06
ENSMUSG00000038510	Rpf2	0.714786	2.79552	40.2919	1.03e-07	6.73e-06
ENSMUSG00000002329	Mdp1	0.590446	4.4658	40.1918	1.06e-07	6.81e-06
ENSMUSG00000019837	Gtf3c6	0.650246	4.3995	40.2322	1.05e-07	6.81e-06
ENSMUSG00000023022	Lima1	-0.629116	6.15747	40.2006	1.06e-07	6.81e-06
ENSMUSG00000090086	AI480526	-1.08393	5.54015	40.2269	1.06e-07	6.81e-06
ENSMUSG00000024436	Mrps18b	0.734445	4.99704	40.1615	1.07e-07	6.84e-06
ENSMUSG00000029017	Pmpcb	0.475323	6.94435	40.0346	1.11e-07	7.06e-06
ENSMUSG00000028961	Pgd	1.45084	8.14126	39.7842	1.22e-07	7.73e-06
ENSMUSG00000033793	Atp6v1h	0.598519	5.96022	39.577	1.25e-07	7.92e-06
ENSMUSG00000029761	Cald1	1.00423	7.47905	39.5549	1.26e-07	7.94e-06
ENSMUSG00000045392	Olfr1033	-2.34778	2.29329	39.6379	1.27e-07	7.95e-06
ENSMUSG00000015536	Mocs2	0.59077	6.77543	39.455	1.3e-07	8.1e-06
ENSMUSG00000011257	Pabpc4	0.71403	5.82447	39.4291	1.3e-07	8.12e-06
ENSMUSG00000035168	Tanc1	0.749755	4.82166	39.4198	1.31e-07	8.12e-06
ENSMUSG00000021737	Psmd6	0.50503	5.84264	39.4016	1.31e-07	8.13e-06
ENSMUSG00000025759	Mfsd8	0.764499	4.16639	39.2767	1.36e-07	8.37e-06
ENSMUSG00000060923	Acyp2	1.18776	3.77929	39.2681	1.36e-07	8.37e-06
ENSMUSG00000097327	E030030I06Rik	-1.19735	1.49093	39.2551	1.37e-07	8.38e-06
ENSMUSG00000019302	Atp6v0a1	0.919369	6.92188	38.9648	1.48e-07	9.03e-06
ENSMUSG00000074781	Ube2n	0.566461	4.84759	38.9063	1.5e-07	9.14e-06
ENSMUSG00000089783	Gm454	-1.63449	4.06234	39.2608	1.51e-07	9.17e-06
ENSMUSG00000045294	Insig1	2.01428	8.12558	39.3182	1.54e-07	9.28e-06
ENSMUSG00000069094	Pde7a	1.03445	3.79177	38.8247	1.54e-07	9.28e-06
ENSMUSG00000024150	Mcfd2	0.611838	7.4248	38.7631	1.56e-07	9.29e-06
ENSMUSG00000028976	Slc2a5	3.23768	3.42385	39.5209	1.56e-07	9.29e-06
ENSMUSG00000036078	Sigmar1	0.937192	7.47317	38.7802	1.56e-07	9.29e-06
ENSMUSG00000053580	Tanc2	0.95378	3.61814	38.7797	1.56e-07	9.29e-06
ENSMUSG00000024990	Rbp4	1.1624	11.2166	38.712	1.58e-07	9.38e-06
ENSMUSG00000001348	Acp5	-0.725113	8.00612	38.6012	1.63e-07	9.64e-06
ENSMUSG00000026019	Wdr12	0.609002	4.03852	38.5728	1.65e-07	9.68e-06
ENSMUSG00000037149	Ddx1	0.527253	6.34447	38.5113	1.67e-07	9.75e-06
ENSMUSG00000040850	Psme4	0.662025	6.26713	38.5309	1.66e-07	9.75e-06
ENSMUSG00000031299	Pdha1	0.806132	7.75649	38.4914	1.68e-07	9.77e-06
ENSMUSG00000026730	Pter	0.989901	5.38851	38.459	1.7e-07	9.8e-06
ENSMUSG00000040907	Atp1a3	2.01115	4.25991	39.0939	1.69e-07	9.8e-06
ENSMUSG00000018415	Gid4	0.607591	5.44808	38.4409	1.71e-07	9.81e-06
ENSMUSG00000038893	Fam117a	-0.867845	3.95745	38.4295	1.71e-07	9.81e-06
ENSMUSG00000030298	Sec13	0.817601	6.28335	38.3718	1.74e-07	9.9e-06
ENSMUSG00000039103	Nexn	1.22034	2.34072	38.3774	1.74e-07	9.9e-06
ENSMUSG00000019832	Rab32	0.843788	4.82737	38.3598	1.74e-07	9.91e-06
ENSMUSG00000032112	Trappc4	0.904605	5.30848	38.3479	1.75e-07	9.91e-06
ENSMUSG00000058267	Mrps14	0.586038	4.92658	38.3235	1.76e-07	9.94e-06
ENSMUSG00000034343	Ube2f	0.599379	5.28238	38.1101	1.87e-07	1.05e-05
ENSMUSG00000039470	Zdhhc2	1.63323	2.26253	38.0991	1.87e-07	1.05e-05
ENSMUSG00000052214	Opa3	0.686806	5.73732	38.1251	1.86e-07	1.05e-05
ENSMUSG00000053768	Chchd3	0.519235	6.67539	38.081	1.88e-07	1.05e-05
ENSMUSG00000068009	Bpifb6	3.54808	0.454802	45.9607	1.91e-07	1.06e-05
ENSMUSG00000010914	Pdhx	0.786366	5.3775	37.8949	1.98e-07	1.09e-05
ENSMUSG00000079658	Tceb1	0.531047	4.97987	37.9102	1.97e-07	1.09e-05
ENSMUSG00000045854	Lyrm2	0.540993	3.45752	37.7348	2.07e-07	1.14e-05
ENSMUSG00000029998	Pcyox1	0.604924	7.45209	37.6542	2.12e-07	1.16e-05
ENSMUSG00000063253	Scoc	0.907049	3.74277	37.5849	2.16e-07	1.18e-05
ENSMUSG00000026504	Sdccag8	-0.663149	3.67278	37.5076	2.21e-07	1.2e-05
ENSMUSG00000028494	Plin2	1.58551	9.19835	37.4384	2.28e-07	1.24e-05
ENSMUSG00000047459	Dynlrb1	0.474943	6.6739	37.363	2.3e-07	1.24e-05
ENSMUSG00000000934	Top1mt	0.650091	4.48657	37.3144	2.33e-07	1.25e-05
ENSMUSG00000055943	Emc7	0.454717	5.9926	37.3188	2.32e-07	1.25e-05
ENSMUSG00000028247	Coq3	0.591309	4.46705	37.2858	2.35e-07	1.26e-05
ENSMUSG00000001870	Ltbp1	-0.966266	3.81791	37.2027	2.4e-07	1.28e-05
ENSMUSG00000006850	Tmco6	-0.841652	3.3232	37.1885	2.41e-07	1.28e-05
ENSMUSG00000021109	Hif1a	0.893981	5.16086	37.2027	2.4e-07	1.28e-05
ENSMUSG00000078695	Cisd3	1.24396	5.66085	37.3623	2.44e-07	1.29e-05
ENSMUSG00000019944	Rhobtb1	-0.916308	6.07125	37.0838	2.48e-07	1.3e-05
ENSMUSG00000020840	Blmh	0.743203	5.74545	37.1142	2.46e-07	1.3e-05
ENSMUSG00000035354	Uvrag	0.503674	5.24595	37.0982	2.47e-07	1.3e-05
ENSMUSG00000038160	Atg5	0.53948	5.26306	37.0935	2.47e-07	1.3e-05
ENSMUSG00000075703	Ept1	0.49822	5.36925	37.0561	2.5e-07	1.31e-05
ENSMUSG00000090553	Snrpe	0.58875	3.91729	37.039	2.51e-07	1.31e-05
ENSMUSG00000026675	Hsd17b7	1.39413	5.43598	37.2614	2.55e-07	1.32e-05
ENSMUSG00000053214	Gm9899	2.68907	0.536951	36.9414	2.58e-07	1.33e-05
ENSMUSG00000062981	Mrpl42	0.599213	5.74644	36.974	2.56e-07	1.33e-05
ENSMUSG00000025940	Tmem70	0.506637	5.25993	36.9274	2.59e-07	1.34e-05
ENSMUSG00000035311	Gnptab	0.908295	5.07168	36.8719	2.63e-07	1.35e-05
ENSMUSG00000008393	Carhsp1	0.580174	7.4938	36.805	2.68e-07	1.37e-05
ENSMUSG00000032018	Sc5d	1.56161	8.37098	36.9926	2.67e-07	1.37e-05
ENSMUSG00000055652	Klhl25	1.05526	4.07389	36.6593	2.79e-07	1.42e-05
ENSMUSG00000039826	Trub2	1.25498	4.50071	36.7381	2.85e-07	1.45e-05
ENSMUSG00000029059	Fam213b	1.30614	5.93923	36.8476	2.88e-07	1.46e-05
ENSMUSG00000027111	Itga6	0.915582	5.85538	36.431	2.98e-07	1.5e-05
ENSMUSG00000020532	Acaca	1.8079	8.34356	36.722	3.02e-07	1.51e-05
ENSMUSG00000030225	Dera	0.786703	5.63565	36.3756	3.02e-07	1.51e-05
ENSMUSG00000031447	Lamp1	0.499758	9.54981	36.3679	3.03e-07	1.51e-05
ENSMUSG00000044986	Tst	-1.58703	7.75434	36.6992	3e-07	1.51e-05
ENSMUSG00000070465	Gm9696	4.57233	1.60915	45.0139	3.04e-07	1.51e-05
ENSMUSG00000090939	Gm17147	3.51905	-1.32509	38.0586	3e-07	1.51e-05
ENSMUSG00000045573	Penk	-2.16833	4.62278	37.0096	3.06e-07	1.52e-05
ENSMUSG00000063884	Ptcd3	0.693162	5.01467	36.27	3.11e-07	1.54e-05
ENSMUSG00000025421	Hdhd2	0.478204	5.07783	36.2253	3.15e-07	1.55e-05
ENSMUSG00000015290	Ubl4	0.54673	5.2934	36.0905	3.28e-07	1.6e-05
ENSMUSG00000022295	Atp6v1c1	0.415904	5.48581	36.1162	3.25e-07	1.6e-05
ENSMUSG00000074743	Thbd	-1.02844	6.31743	36.11	3.28e-07	1.6e-05
ENSMUSG00000025453	Nnt	-0.814786	5.87744	36.0071	3.35e-07	1.63e-05
ENSMUSG00000027774	Gfm1	0.590505	6.30715	35.748	3.61e-07	1.74e-05
ENSMUSG00000028932	Psmc2	0.497024	6.58557	35.7748	3.58e-07	1.74e-05
ENSMUSG00000033096	Apmap	0.579181	7.13455	35.7542	3.6e-07	1.74e-05
ENSMUSG00000055799	Tcf7l1	-0.787895	4.88716	35.7465	3.61e-07	1.74e-05
ENSMUSG00000016619	Nup50	0.493761	5.24331	35.7186	3.64e-07	1.75e-05
ENSMUSG00000038975	Rabggtb	0.574294	5.44531	35.6641	3.7e-07	1.77e-05
ENSMUSG00000001576	Ergic1	0.818706	6.9537	35.6368	3.72e-07	1.78e-05
ENSMUSG00000068823	Csde1	0.614414	7.8615	35.5973	3.77e-07	1.8e-05
ENSMUSG00000021286	Zfyve21	0.533286	5.34184	35.54	3.83e-07	1.82e-05
ENSMUSG00000007594	Hapln4	2.33046	2.74911	35.5743	3.86e-07	1.83e-05
ENSMUSG00000028780	Sema3c	1.39481	4.10144	35.6972	3.88e-07	1.84e-05
ENSMUSG00000052459	Atp6v1a	0.68249	5.69714	35.4488	3.93e-07	1.85e-05
ENSMUSG00000025409	Mbd6	-0.530492	6.52462	35.4059	3.98e-07	1.87e-05
ENSMUSG00000044018	Mrpl50	0.628277	5.42919	35.4091	3.97e-07	1.87e-05
ENSMUSG00000014959	Gorasp2	0.58354	6.96219	35.3585	4.03e-07	1.89e-05
ENSMUSG00000062937	Mtap	0.750021	4.5514	35.309	4.09e-07	1.91e-05
ENSMUSG00000036985	Zdhhc9	0.519993	6.78929	35.2729	4.13e-07	1.92e-05
ENSMUSG00000046215	Rprml	-2.20342	2.53724	42.502	4.12e-07	1.92e-05
ENSMUSG00000056228	Cars2	0.528881	4.29729	35.2265	4.19e-07	1.94e-05
ENSMUSG00000022404	Slc25a17	0.609587	5.65487	35.1984	4.22e-07	1.95e-05
ENSMUSG00000028261	Ndufaf4	0.694056	4.60829	35.1768	4.24e-07	1.95e-05
ENSMUSG00000085287	4833418N02Rik	-1.04788	1.77853	35.1935	4.22e-07	1.95e-05
ENSMUSG00000028690	Mmachc	0.703673	4.39253	35.1073	4.33e-07	1.99e-05
ENSMUSG00000030286	Emc3	0.358931	6.267	35.0652	4.38e-07	2e-05
ENSMUSG00000045679	Pqlc3	1.1226	3.91102	35.0145	4.45e-07	2.02e-05
ENSMUSG00000079508	Apoo	0.70761	3.01869	35.0133	4.45e-07	2.02e-05
ENSMUSG00000004085	Zak	0.585598	4.54975	34.9753	4.5e-07	2.04e-05
ENSMUSG00000051439	Cd14	-1.38179	2.80401	34.8768	4.62e-07	2.09e-05
ENSMUSG00000032435	Dync1li1	0.393515	4.91009	34.7629	4.78e-07	2.16e-05
ENSMUSG00000038022	Fam188b	-1.41922	2.67798	34.7545	4.79e-07	2.16e-05
ENSMUSG00000014226	Cacybp	0.717313	4.70245	34.7274	4.83e-07	2.17e-05
ENSMUSG00000021474	Sfxn1	-0.825539	7.12496	34.7164	4.84e-07	2.17e-05
ENSMUSG00000046727	Cystm1	1.11209	4.16368	34.7242	4.83e-07	2.17e-05
ENSMUSG00000021460	Auh	0.506161	5.92382	34.6742	4.9e-07	2.18e-05
ENSMUSG00000045312	Lhfpl2	0.957337	6.01948	34.678	4.9e-07	2.18e-05
ENSMUSG00000016257	Slmo2	0.766607	5.25619	34.5937	5.02e-07	2.2e-05
ENSMUSG00000022053	Ebf2	-1.25734	3.16411	38.2156	4.97e-07	2.2e-05
ENSMUSG00000022305	Lrp12	-0.932901	2.83113	34.6268	4.97e-07	2.2e-05
ENSMUSG00000066571	4931406P16Rik	-0.943747	5.27827	34.6113	4.99e-07	2.2e-05
ENSMUSG00000023156	Rpp14	0.650889	4.11239	34.566	5.06e-07	2.22e-05
ENSMUSG00000005360	Slc1a3	-1.47358	5.94418	34.9411	5.11e-07	2.23e-05
ENSMUSG00000019210	Atp6v1e1	0.518689	7.05164	34.5165	5.13e-07	2.23e-05
ENSMUSG00000026615	Eprs	0.553875	6.91011	34.5249	5.12e-07	2.23e-05
ENSMUSG00000028085	Pet112	0.839092	5.23752	34.5005	5.15e-07	2.24e-05
ENSMUSG00000026027	Stradb	0.465864	5.40801	34.4545	5.22e-07	2.26e-05
ENSMUSG00000056770	Setd3	0.354995	6.91382	34.4524	5.22e-07	2.26e-05
ENSMUSG00000030609	Aen	0.815464	4.06508	34.365	5.36e-07	2.3e-05
ENSMUSG00000030747	Dgat2	1.19859	10.6513	34.3647	5.36e-07	2.3e-05
ENSMUSG00000047793	Sned1	-0.824522	4.51265	34.3598	5.37e-07	2.3e-05
ENSMUSG00000029068	Ccnl2	-0.612033	7.23369	34.303	5.45e-07	2.33e-05
ENSMUSG00000001436	Slc19a1	0.969951	4.51634	34.2335	5.56e-07	2.37e-05
ENSMUSG00000010376	Nedd8	0.784095	6.14941	34.2451	5.55e-07	2.37e-05
ENSMUSG00000015980	Lrrc27	1.19668	3.0124	34.2073	5.61e-07	2.38e-05
ENSMUSG00000025203	Scd2	2.8714	7.69519	34.938	5.61e-07	2.38e-05
ENSMUSG00000025324	Atp10a	1.21963	3.16882	34.1363	5.72e-07	2.42e-05
ENSMUSG00000029640	Usp12	0.44691	4.34587	34.1245	5.74e-07	2.42e-05
ENSMUSG00000025854	Fam20c	1.39368	6.49221	34.4315	5.79e-07	2.43e-05
ENSMUSG00000075415	Fnbp1	-0.604877	5.78844	34.11	5.77e-07	2.43e-05
ENSMUSG00000026154	1110058L19Rik	0.792326	3.68624	34.0763	5.82e-07	2.44e-05
ENSMUSG00000044447	Dock5	0.786142	4.17205	34.0325	5.9e-07	2.46e-05
ENSMUSG00000035545	Leng8	-0.587008	7.83273	33.9832	5.98e-07	2.48e-05
ENSMUSG00000040550	Otud6b	0.668487	4.99163	33.9859	5.98e-07	2.48e-05
ENSMUSG00000041540	Sox5	-0.95784	3.04719	33.9978	5.96e-07	2.48e-05
ENSMUSG00000024600	Slc27a6	2.77013	0.255609	33.95	6.04e-07	2.49e-05
ENSMUSG00000038028	9630033F20Rik	0.85796	3.65199	33.9639	6.02e-07	2.49e-05
ENSMUSG00000005262	Ufd1l	0.441456	5.66664	33.854	6.21e-07	2.56e-05
ENSMUSG00000026571	Dcaf6	0.598329	5.5072	33.8037	6.3e-07	2.57e-05
ENSMUSG00000027076	Timm10	1.14129	4.01676	33.8014	6.31e-07	2.57e-05
ENSMUSG00000030603	Psmc4	0.628675	6.68097	33.8344	6.25e-07	2.57e-05
ENSMUSG00000032688	Malt1	1.06063	3.57748	33.8065	6.3e-07	2.57e-05
ENSMUSG00000037709	Fam13a	-1.82466	6.32434	34.3591	6.3e-07	2.57e-05
ENSMUSG00000081058	Hist2h3c2	2.45614	1.09818	33.7933	6.32e-07	2.57e-05
ENSMUSG00000006764	Tph2	4.71762	0.603177	45.4746	6.41e-07	2.6e-05
ENSMUSG00000000838	Fmr1	1.40247	5.76494	34.0454	6.51e-07	2.63e-05
ENSMUSG00000034981	Parm1	1.94498	3.58933	34.0508	6.61e-07	2.67e-05
ENSMUSG00000044916	1700029I15Rik	1.51024	2.34511	33.6134	6.66e-07	2.68e-05
ENSMUSG00000020541	Tom1l1	0.561403	4.1594	33.5642	6.76e-07	2.72e-05
ENSMUSG00000023988	Bysl	0.877476	4.39834	33.4825	6.92e-07	2.77e-05
ENSMUSG00000027879	Sec22b	0.561991	5.74303	33.4891	6.91e-07	2.77e-05
ENSMUSG00000021076	Actr10	0.376307	5.26108	33.4514	6.98e-07	2.78e-05
ENSMUSG00000031545	Agpat6	-0.703252	7.69301	33.462	6.96e-07	2.78e-05
ENSMUSG00000002227	Mov10	-0.633858	5.29603	33.3716	7.15e-07	2.84e-05
ENSMUSG00000029767	Calu	0.620055	7.23789	33.2541	7.4e-07	2.92e-05
ENSMUSG00000033809	Alg3	0.891942	4.16468	33.2577	7.39e-07	2.92e-05
ENSMUSG00000051627	Hist1h1e	2.43261	1.54517	33.2686	7.39e-07	2.92e-05
ENSMUSG00000048100	Taf13	0.786689	3.89181	33.1979	7.52e-07	2.96e-05
ENSMUSG00000024896	Minpp1	0.423726	5.18896	33.1448	7.64e-07	3e-05
ENSMUSG00000039221	Rpl22l1	0.972882	4.63609	33.1034	7.73e-07	3.03e-05
ENSMUSG00000008226	Scrn3	0.582062	5.34395	33.0629	7.82e-07	3.06e-05
ENSMUSG00000029103	Lrpap1	0.987867	7.1798	33.0356	7.89e-07	3.08e-05
ENSMUSG00000020458	Rtn4	0.842747	6.99173	32.9641	8.06e-07	3.13e-05
ENSMUSG00000071078	Nr2c2ap	0.863357	3.58492	32.9662	8.05e-07	3.13e-05
ENSMUSG00000012889	Podnl1	3.45391	1.0639	33.1091	8.12e-07	3.15e-05
ENSMUSG00000018102	Hist1h2bc	1.05647	6.43292	32.9917	8.17e-07	3.16e-05
ENSMUSG00000042978	Sbk1	1.49594	5.6137	33.2492	8.31e-07	3.2e-05
ENSMUSG00000061780	Cfd	-3.08436	11.6222	33.3339	8.28e-07	3.2e-05
ENSMUSG00000031605	Klhl2	-0.786411	6.3592	32.7921	8.47e-07	3.25e-05
ENSMUSG00000074971	Fibin	1.27094	2.01214	32.7891	8.48e-07	3.25e-05
ENSMUSG00000000168	Dlat	0.988752	6.41007	32.7464	8.63e-07	3.29e-05
ENSMUSG00000024487	Yipf5	0.494282	4.98843	32.7274	8.64e-07	3.29e-05
ENSMUSG00000041958	Pigs	0.684464	5.67174	32.69	8.73e-07	3.32e-05
ENSMUSG00000038845	Phb	0.56621	6.5083	32.6115	8.94e-07	3.39e-05
ENSMUSG00000058672	Tubb2a	1.35738	5.83388	32.9144	8.98e-07	3.4e-05
ENSMUSG00000020664	Dld	0.69517	7.06274	32.5501	9.1e-07	3.43e-05
ENSMUSG00000026567	Adcy10	3.05781	0.460096	32.5612	9.07e-07	3.43e-05
ENSMUSG00000026880	Stom	0.667713	6.40511	32.5433	9.12e-07	3.43e-05
ENSMUSG00000040711	Sh3pxd2b	1.10663	3.55061	32.5582	9.08e-07	3.43e-05
ENSMUSG00000025178	Pi4k2a	0.634316	6.22417	32.5129	9.2e-07	3.45e-05
ENSMUSG00000097048	1600020E01Rik	-0.729461	3.0675	32.4593	9.35e-07	3.5e-05
ENSMUSG00000039197	Adk	0.603728	8.67701	32.4269	9.44e-07	3.52e-05
ENSMUSG00000060477	Irak2	0.806118	5.77669	32.3767	9.58e-07	3.57e-05
ENSMUSG00000020003	Pex7	0.438007	5.65663	32.3633	9.62e-07	3.58e-05
ENSMUSG00000005803	Sqrdl	-0.757431	7.18772	32.3293	9.72e-07	3.6e-05
ENSMUSG00000024835	Coro1b	-0.569464	7.43374	32.3148	9.76e-07	3.61e-05
ENSMUSG00000015476	Prrt1	-2.14689	1.88249	32.2043	1.01e-06	3.71e-05
ENSMUSG00000026750	Psmb7	0.481538	6.95554	32.1875	1.01e-06	3.71e-05
ENSMUSG00000030770	Parva	0.460588	7.06614	32.2213	1e-06	3.71e-05
ENSMUSG00000043411	Usp48	-0.34727	5.47849	32.2081	1.01e-06	3.71e-05
ENSMUSG00000090084	Srpx	-1.92353	2.50401	32.2915	1.01e-06	3.71e-05
ENSMUSG00000037977	6430571L13Rik	1.76287	0.179324	32.1533	1.02e-06	3.74e-05
ENSMUSG00000029596	Sdsl	1.21901	3.98247	32.2093	1.03e-06	3.76e-05
ENSMUSG00000022663	Atg3	0.554209	6.25798	32.0957	1.04e-06	3.79e-05
ENSMUSG00000026932	Nacc2	0.626672	5.55998	32.0373	1.06e-06	3.84e-05
ENSMUSG00000081534	Slc48a1	0.611598	7.38362	32.0419	1.06e-06	3.84e-05
ENSMUSG00000036136	Fam110c	1.40017	2.5941	32.0289	1.06e-06	3.85e-05
ENSMUSG00000030924	2610020H08Rik	-1.13177	2.4359	31.9841	1.08e-06	3.89e-05
ENSMUSG00000032315	Cyp1a1	-6.35986	-0.101441	32.1716	1.08e-06	3.89e-05
ENSMUSG00000043415	Otud1	-0.725846	2.57718	31.9562	1.09e-06	3.9e-05
ENSMUSG00000052906	Ubxn8	0.455055	4.72071	31.9567	1.09e-06	3.9e-05
ENSMUSG00000026005	Rpe	0.821325	5.0999	31.923	1.1e-06	3.93e-05
ENSMUSG00000007777	0610009B22Rik	0.603049	4.00155	31.8676	1.11e-06	3.99e-05
ENSMUSG00000001467	Cyp51	1.48826	6.85569	32.1128	1.14e-06	4.09e-05
ENSMUSG00000024193	Phf1	-0.700482	5.50442	31.7313	1.16e-06	4.14e-05
ENSMUSG00000031613	Hpgd	-1.59882	5.79392	32.149	1.16e-06	4.14e-05
ENSMUSG00000020828	Pld2	-0.539767	4.40242	31.7068	1.17e-06	4.15e-05
ENSMUSG00000003153	Slc2a3	-1.77429	2.91047	31.8297	1.17e-06	4.16e-05
ENSMUSG00000031521	Aga	0.574252	4.42119	31.6726	1.18e-06	4.17e-05
ENSMUSG00000075486	Commd6	0.517512	4.57472	31.6703	1.18e-06	4.17e-05
ENSMUSG00000019883	Echdc1	0.947392	6.58733	31.6243	1.2e-06	4.22e-05
ENSMUSG00000038970	Lmtk2	0.43499	4.43207	31.6014	1.21e-06	4.24e-05
ENSMUSG00000027236	Eif3j1	0.658098	4.72927	31.567	1.22e-06	4.28e-05
ENSMUSG00000005813	Metap1	0.391648	5.13773	31.3927	1.28e-06	4.49e-05
ENSMUSG00000028789	Adc	-1.09723	3.96846	31.3929	1.29e-06	4.49e-05
ENSMUSG00000040441	Slc26a10	-1.72078	2.35949	31.3827	1.29e-06	4.49e-05
ENSMUSG00000031340	Gabre	-1.31554	1.31116	31.3589	1.3e-06	4.52e-05
ENSMUSG00000021890	Eaf1	0.409231	5.27407	31.297	1.32e-06	4.58e-05
ENSMUSG00000024842	Cabp4	-2.54281	0.110032	31.308	1.32e-06	4.58e-05
ENSMUSG00000038587	Akap12	0.765323	5.87219	31.2655	1.33e-06	4.62e-05
ENSMUSG00000047246	Hist1h2be	2.07048	2.51824	31.4154	1.34e-06	4.62e-05
ENSMUSG00000073676	Hspe1	0.75298	6.51621	31.2358	1.35e-06	4.63e-05
ENSMUSG00000021520	Uqcrb	0.528645	7.08529	31.1951	1.36e-06	4.67e-05
ENSMUSG00000038527	C1rl	0.678349	6.99373	31.1961	1.36e-06	4.67e-05
ENSMUSG00000016024	Lbp	1.17657	7.52638	31.253	1.37e-06	4.68e-05
ENSMUSG00000030409	Dmpk	1.26474	7.07288	31.3591	1.37e-06	4.68e-05
ENSMUSG00000038506	Dcun1d2	0.555502	4.16192	31.1775	1.37e-06	4.68e-05
ENSMUSG00000043719	Col6a6	-1.73339	3.03256	31.1844	1.43e-06	4.87e-05
ENSMUSG00000029500	Pgam5	0.527657	4.40762	30.9775	1.46e-06	4.92e-05
ENSMUSG00000068039	Tcp1	0.47213	7.07666	30.9838	1.45e-06	4.92e-05
ENSMUSG00000075394	Hoxc4	-0.943719	3.24867	30.9786	1.46e-06	4.92e-05
ENSMUSG00000023067	Cdkn1a	2.71298	5.87509	31.5758	1.48e-06	4.97e-05
ENSMUSG00000068040	Tm9sf4	0.36651	6.24705	30.9346	1.48e-06	4.97e-05
ENSMUSG00000039270	Megf9	1.03873	4.44312	30.9368	1.48e-06	4.98e-05
ENSMUSG00000037278	Tmem97	0.738315	6.25792	30.909	1.49e-06	4.99e-05
ENSMUSG00000066150	Slc31a1	0.457695	7.07907	30.8915	1.49e-06	5e-05
ENSMUSG00000007338	Mrpl49	0.416727	5.35908	30.8799	1.5e-06	5.01e-05
ENSMUSG00000074170	Plekhf1	-0.75557	3.72406	30.8415	1.52e-06	5.06e-05
ENSMUSG00000002580	Mien1	0.863659	5.83631	30.8154	1.53e-06	5.07e-05
ENSMUSG00000024247	Pkdcc	-0.879595	4.89419	30.819	1.53e-06	5.07e-05
ENSMUSG00000063229	Ldha	0.958682	9.79794	30.8229	1.53e-06	5.07e-05
ENSMUSG00000039047	Pigk	0.47552	5.49521	30.7837	1.54e-06	5.1e-05
ENSMUSG00000062376	2010012O05Rik	0.703642	3.74624	30.7904	1.54e-06	5.1e-05
ENSMUSG00000026889	Rbm18	0.592076	4.12381	30.7612	1.55e-06	5.12e-05
ENSMUSG00000034258	Mfsd7c	-1.50445	1.65817	30.7599	1.56e-06	5.12e-05
ENSMUSG00000026727	Rsu1	0.486601	5.81808	30.7091	1.58e-06	5.18e-05
ENSMUSG00000085562	2610028E06Rik	4.69966	-1.70907	30.7146	1.58e-06	5.18e-05
ENSMUSG00000028557	Rnf11	0.748401	6.77437	30.6889	1.59e-06	5.2e-05
ENSMUSG00000025980	Hspd1	0.652329	8.50385	30.6713	1.6e-06	5.22e-05
ENSMUSG00000027599	Armc1	0.511565	4.92894	30.6463	1.61e-06	5.24e-05
ENSMUSG00000038412	Higd1a	0.745166	5.80096	30.6368	1.61e-06	5.25e-05
ENSMUSG00000032437	Stt3b	0.3732	7.01588	30.5909	1.64e-06	5.31e-05
ENSMUSG00000019794	Katna1	0.570504	4.50341	30.5732	1.65e-06	5.33e-05
ENSMUSG00000020986	Sec23a	0.603561	5.88904	30.5461	1.66e-06	5.37e-05
ENSMUSG00000022757	Tfg	0.594392	5.88199	30.4969	1.68e-06	5.44e-05
ENSMUSG00000039246	Lyplal1	0.551441	4.16677	30.4839	1.69e-06	5.45e-05
ENSMUSG00000014361	Mertk	-0.849394	4.73868	30.431	1.72e-06	5.5e-05
ENSMUSG00000026036	Nif3l1	0.487161	3.99073	30.4311	1.72e-06	5.5e-05
ENSMUSG00000027309	4930402H24Rik	0.655522	6.10174	30.4329	1.72e-06	5.5e-05
ENSMUSG00000034926	Dhcr24	1.35908	9.26814	30.4252	1.72e-06	5.5e-05
ENSMUSG00000060450	Rnf14	0.512145	6.14954	30.4432	1.71e-06	5.5e-05
ENSMUSG00000014504	Srp19	0.425192	4.26361	30.4059	1.73e-06	5.52e-05
ENSMUSG00000086460	Gm12236	2.34712	0.345877	39.3207	1.74e-06	5.54e-05
ENSMUSG00000046378	Asphd1	-2.72372	-1.23975	33.1432	1.77e-06	5.63e-05
ENSMUSG00000021943	Gdf10	-1.84226	4.4434	30.7244	1.8e-06	5.7e-05
ENSMUSG00000023050	Map3k12	-0.816613	3.10654	30.2015	1.84e-06	5.83e-05
ENSMUSG00000050737	Ptges	1.5621	5.58419	30.5634	1.86e-06	5.88e-05
ENSMUSG00000021339	Mrs2	0.462217	4.76183	30.1431	1.88e-06	5.9e-05
ENSMUSG00000023110	Prmt5	0.598457	5.05998	30.1551	1.87e-06	5.9e-05
ENSMUSG00000061353	Cxcl12	-0.622236	8.10792	30.1247	1.89e-06	5.92e-05
ENSMUSG00000001056	Nhp2	0.862055	4.62444	30.0932	1.91e-06	5.97e-05
ENSMUSG00000050565	Tor1aip2	0.403286	6.95215	30.0838	1.91e-06	5.97e-05
ENSMUSG00000024208	Uqcc2	0.820073	4.72704	30.0726	1.92e-06	5.98e-05
ENSMUSG00000017978	Cadps2	-1.52604	3.22575	30.0766	1.96e-06	6.08e-05
ENSMUSG00000031864	Ints10	0.741332	3.73636	30.0098	1.95e-06	6.08e-05
ENSMUSG00000025747	Tyms	0.74546	2.68126	29.9957	1.96e-06	6.09e-05
ENSMUSG00000052915	Msl1	-0.288762	5.86952	29.9658	1.98e-06	6.14e-05
ENSMUSG00000027035	Cers6	-1.1171	3.31118	29.9454	1.99e-06	6.17e-05
ENSMUSG00000024165	Hn1l	0.866978	4.86853	29.9125	2.01e-06	6.21e-05
ENSMUSG00000055128	Cgrrf1	0.413227	4.98593	29.9118	2.01e-06	6.21e-05
ENSMUSG00000031503	Col4a2	0.908985	9.27932	29.8759	2.04e-06	6.27e-05
ENSMUSG00000056999	Ide	0.52012	6.07542	29.8708	2.04e-06	6.27e-05
ENSMUSG00000060073	Psma3	0.472191	6.49918	29.851	2.05e-06	6.29e-05
ENSMUSG00000029701	Rbm28	0.605482	5.87331	29.8278	2.07e-06	6.33e-05
ENSMUSG00000030935	Acsm3	-1.98288	6.39181	30.323	2.07e-06	6.33e-05
ENSMUSG00000093812	Gm5627	2.5605	2.43411	33.0423	2.08e-06	6.34e-05
ENSMUSG00000073542	Cep76	0.779724	2.55665	29.7629	2.11e-06	6.42e-05
ENSMUSG00000030894	Tpp1	0.386258	6.94213	29.6808	2.16e-06	6.58e-05
ENSMUSG00000045709	1700023L04Rik	-1.44774	1.64965	32.3527	2.18e-06	6.62e-05
ENSMUSG00000005078	Jkamp	0.422584	4.63132	29.6282	2.2e-06	6.66e-05
ENSMUSG00000032458	Copb2	0.438787	7.19055	29.6228	2.2e-06	6.66e-05
ENSMUSG00000032803	Cdv3	0.403244	6.45965	29.5962	2.22e-06	6.7e-05
ENSMUSG00000091243	Vgll3	1.53718	3.7262	29.8326	2.22e-06	6.7e-05
ENSMUSG00000030980	Knop1	0.384238	5.0893	29.5414	2.26e-06	6.8e-05
ENSMUSG00000058690	Ccser2	0.659419	5.62626	29.4883	2.29e-06	6.9e-05
ENSMUSG00000026511	Srp9	0.50502	5.79853	29.4663	2.31e-06	6.93e-05
ENSMUSG00000025616	Usp16	0.469426	4.9655	29.4326	2.33e-06	6.99e-05
ENSMUSG00000026946	Nmi	-0.480046	3.92485	29.4163	2.35e-06	7.02e-05
ENSMUSG00000027519	Rab22a	0.338166	5.31509	29.3304	2.41e-06	7.19e-05
ENSMUSG00000028647	Mycbp	0.585023	3.88052	29.2967	2.43e-06	7.26e-05
ENSMUSG00000027952	Pmvk	1.60958	6.1976	29.6844	2.45e-06	7.29e-05
ENSMUSG00000045980	Tmem104	0.677651	4.7757	29.2551	2.47e-06	7.33e-05
ENSMUSG00000074807	Gm10762	0.753917	1.90652	29.1823	2.52e-06	7.48e-05
ENSMUSG00000025723	Nmb	-1.77613	0.616335	29.1713	2.53e-06	7.49e-05
ENSMUSG00000024589	Nedd4l	0.775925	5.64509	29.1587	2.54e-06	7.51e-05
ENSMUSG00000023945	Slc5a7	4.79106	1.08247	38.6919	2.55e-06	7.52e-05
ENSMUSG00000027533	Fabp5	2.47669	7.55947	29.6616	2.57e-06	7.54e-05
ENSMUSG00000048924	Ccdc125	0.980031	3.05147	29.1209	2.57e-06	7.54e-05
ENSMUSG00000050549	5730508B09Rik	1.22385	3.08763	29.1177	2.57e-06	7.54e-05
ENSMUSG00000066892	Fbxl12	-0.631363	3.89886	29.1274	2.57e-06	7.54e-05
ENSMUSG00000032401	Lctl	2.67863	4.22765	30.9201	2.62e-06	7.65e-05
ENSMUSG00000097124	A530020G20Rik	-1.31137	5.17261	29.3257	2.62e-06	7.65e-05
ENSMUSG00000034842	Art3	-0.795774	6.70868	29.0251	2.65e-06	7.73e-05
ENSMUSG00000044749	Abca6	-0.93425	5.70748	29.0029	2.67e-06	7.77e-05
ENSMUSG00000045038	Prkce	0.651431	4.60895	28.964	2.7e-06	7.85e-05
ENSMUSG00000027714	Exosc9	0.472299	4.18048	28.9502	2.71e-06	7.87e-05
ENSMUSG00000050043	Tmx2	0.543166	5.16373	28.9344	2.72e-06	7.89e-05
ENSMUSG00000050552	Lamtor4	0.818956	5.93624	28.9337	2.72e-06	7.89e-05
ENSMUSG00000066979	Bub3	0.393712	5.30355	28.9238	2.73e-06	7.9e-05
ENSMUSG00000025348	Itga7	0.626358	7.00678	28.9112	2.74e-06	7.92e-05
ENSMUSG00000029152	Ociad1	0.358222	6.97	28.8872	2.76e-06	7.96e-05
ENSMUSG00000020328	Nudcd2	0.465323	4.43036	28.8713	2.78e-06	7.98e-05
ENSMUSG00000039883	Lrrc17	-1.57113	2.10895	28.8678	2.78e-06	7.98e-05
ENSMUSG00000003948	Mmd	1.05579	8.26112	28.8284	2.82e-06	8.07e-05
ENSMUSG00000030407	Qpctl	0.587819	4.45765	28.8248	2.82e-06	8.07e-05
ENSMUSG00000019487	Trip10	-0.606203	5.11577	28.7998	2.84e-06	8.12e-05
ENSMUSG00000024583	Txnl1	0.534564	6.07014	28.7675	2.87e-06	8.18e-05
ENSMUSG00000026914	Psmd14	0.644869	5.73303	28.7565	2.88e-06	8.18e-05
ENSMUSG00000027312	Atrn	0.585456	5.89969	28.7586	2.88e-06	8.18e-05
ENSMUSG00000051256	Jagn1	0.598724	4.84377	28.7541	2.88e-06	8.18e-05
ENSMUSG00000007891	Ctsd	1.13212	9.05318	28.687	2.94e-06	8.33e-05
ENSMUSG00000022272	Myo10	0.615404	5.23338	28.6889	2.94e-06	8.33e-05
ENSMUSG00000025479	Cyp2e1	-2.38235	12.5754	28.9052	2.96e-06	8.36e-05
ENSMUSG00000058153	Sez6l	1.75639	2.30939	28.6219	3.01e-06	8.5e-05
ENSMUSG00000025153	Fasn	2.23114	11.594	28.7743	3.07e-06	8.64e-05
ENSMUSG00000020386	Sar1b	0.452245	6.62367	28.5156	3.1e-06	8.73e-05
ENSMUSG00000031657	Heatr3	0.427725	4.5326	28.5122	3.11e-06	8.73e-05
ENSMUSG00000000730	Dnmt3l	3.88032	0.129286	36.4271	3.14e-06	8.79e-05
ENSMUSG00000020085	Aifm2	0.71154	7.57111	28.4515	3.17e-06	8.86e-05
ENSMUSG00000074218	Cox7a1	1.52257	1.13983	28.4504	3.17e-06	8.86e-05
ENSMUSG00000036698	Ago2	0.520896	4.82161	28.4365	3.18e-06	8.88e-05
ENSMUSG00000022351	Sqle	1.80235	5.90514	28.8585	3.19e-06	8.89e-05
ENSMUSG00000092021	Gbp11	-2.16741	2.88834	28.6393	3.21e-06	8.92e-05
ENSMUSG00000029126	Nsg1	-1.14382	1.98926	28.3961	3.22e-06	8.95e-05
ENSMUSG00000031570	Ppapdc1b	0.815966	4.54001	28.3563	3.26e-06	9.04e-05
ENSMUSG00000042505	Acn9	0.784138	2.50669	28.3346	3.29e-06	9.08e-05
ENSMUSG00000042770	Hebp1	0.675631	7.80906	28.3184	3.3e-06	9.1e-05
ENSMUSG00000060288	Ppih	0.559427	2.66176	28.3192	3.3e-06	9.1e-05
ENSMUSG00000022665	Ccdc80	-1.01634	9.1993	28.303	3.32e-06	9.12e-05
ENSMUSG00000028648	Ndufs5	0.641034	5.39614	28.3079	3.31e-06	9.12e-05
ENSMUSG00000001665	Gstt3	-1.34862	5.19302	28.5427	3.34e-06	9.16e-05
ENSMUSG00000020681	Ace	-1.06279	5.47963	28.3658	3.38e-06	9.24e-05
ENSMUSG00000021287	Xrcc3	0.876641	3.0779	28.2455	3.38e-06	9.24e-05
ENSMUSG00000057572	Zbtb8os	0.439103	4.47516	28.1746	3.46e-06	9.44e-05
ENSMUSG00000037621	Atoh8	-1.13464	4.30165	28.2345	3.48e-06	9.48e-05
ENSMUSG00000027222	Pex16	0.919229	7.15754	28.1286	3.51e-06	9.54e-05
ENSMUSG00000029918	Mrps33	0.569564	3.34726	28.1219	3.51e-06	9.55e-05
ENSMUSG00000045983	Eif4g1	0.640928	9.14351	28.1074	3.53e-06	9.58e-05
ENSMUSG00000020843	Timm22	0.658584	4.00069	28.0887	3.55e-06	9.62e-05
ENSMUSG00000031537	Ikbkb	-0.43011	5.90732	28.0645	3.58e-06	9.68e-05
ENSMUSG00000022906	Parp9	0.505778	6.03943	28.0562	3.59e-06	9.69e-05
ENSMUSG00000030979	Uros	0.57438	4.58786	28.0433	3.6e-06	9.72e-05
ENSMUSG00000019797	1700021F05Rik	0.604013	4.45929	27.9951	3.66e-06	9.8e-05
ENSMUSG00000026155	Smap1	0.420886	5.29316	28.0082	3.64e-06	9.8e-05
ENSMUSG00000028854	Slc9a1	-0.423453	5.0211	27.9961	3.66e-06	9.8e-05
ENSMUSG00000038807	Rap1gap2	1.13227	4.10026	28.086	3.64e-06	9.8e-05
ENSMUSG00000030868	Dctn5	0.434031	5.35739	27.9548	3.7e-06	9.89e-05
ENSMUSG00000031204	Asb12	2.60387	0.239	35.5512	3.7e-06	9.89e-05
ENSMUSG00000038351	Sgsm2	-0.794714	4.31292	27.9575	3.7e-06	9.89e-05
ENSMUSG00000035105	Egln3	0.882779	3.57284	27.9392	3.72e-06	9.91e-05
ENSMUSG00000045441	Gprin3	1.44091	2.37842	27.9415	3.72e-06	9.91e-05
ENSMUSG00000056938	Acbd4	0.63157	7.09297	27.9094	3.76e-06	9.98e-05
ENSMUSG00000026922	Agpat2	1.19147	8.94592	27.8898	3.78e-06	0.000100311
ENSMUSG00000019990	Pde7b	1.30588	1.86865	27.885	3.79e-06	0.000100314
ENSMUSG00000001380	Hars	0.479932	5.53707	27.868	3.81e-06	0.000100706
ENSMUSG00000030842	Lamtor1	0.718077	6.51485	27.8075	3.88e-06	0.000102347
ENSMUSG00000038965	Ube2l3	0.455387	6.55358	27.8106	3.88e-06	0.000102347
ENSMUSG00000075511	1700001L05Rik	1.78895	0.965376	27.7423	3.96e-06	0.00010433
ENSMUSG00000021877	Arf4	0.508526	7.09767	27.7299	3.98e-06	0.000104585
ENSMUSG00000020936	Nmt1	0.433847	6.68769	27.7178	3.99e-06	0.000104835
ENSMUSG00000057469	E2f6	0.443953	4.43399	27.6894	4.03e-06	0.000105627
ENSMUSG00000028899	Taf12	0.449095	4.13582	27.6707	4.05e-06	0.0001061
ENSMUSG00000071528	Usmg5	0.504725	6.04177	27.6605	4.07e-06	0.000106288
ENSMUSG00000033781	Asb13	-0.543792	4.93917	27.6428	4.09e-06	0.000106728
ENSMUSG00000032673	Prorsd1	0.602514	3.43191	27.6362	4.1e-06	0.000106797
ENSMUSG00000031634	Ufsp2	0.454455	5.22337	27.6012	4.14e-06	0.000107677
ENSMUSG00000034088	Hdlbp	0.510006	8.84908	27.5916	4.15e-06	0.000107849
ENSMUSG00000007411	Mark3	0.265138	5.42683	27.4906	4.29e-06	0.00011109
ENSMUSG00000038967	Pdk2	-0.691715	7.50917	27.4893	4.29e-06	0.00011109
ENSMUSG00000018339	Gpx3	-1.48841	8.49343	27.6421	4.3e-06	0.000111167
ENSMUSG00000041957	Pkp2	0.656067	5.84477	27.4722	4.32e-06	0.000111373
ENSMUSG00000035575	Utp6	0.469954	5.11321	27.4675	4.32e-06	0.000111379
ENSMUSG00000006998	Psmd2	0.4451	7.72142	27.446	4.35e-06	0.000111571
ENSMUSG00000026667	Uhmk1	0.528645	5.44922	27.4451	4.35e-06	0.000111571
ENSMUSG00000026869	Psmd5	0.365548	5.15465	27.4458	4.35e-06	0.000111571
ENSMUSG00000040181	Fmo1	-0.750948	7.61078	27.4407	4.36e-06	0.000111571
ENSMUSG00000058147	Xlr3c	6.359	-2.63598	40.1661	4.36e-06	0.000111571
ENSMUSG00000003604	Aven	0.741015	3.92291	27.4327	4.37e-06	0.000111586
ENSMUSG00000021981	Cab39l	0.441391	5.85257	27.4301	4.37e-06	0.000111586
ENSMUSG00000020803	Txndc17	0.440354	6.11069	27.4233	4.38e-06	0.000111668
ENSMUSG00000015002	Efr3a	0.515941	5.37474	27.4122	4.4e-06	0.000111903
ENSMUSG00000032547	Ryk	0.387094	5.70848	27.3814	4.44e-06	0.000112848
ENSMUSG00000035704	Alg8	0.649389	3.42397	27.3615	4.47e-06	0.000113244
ENSMUSG00000058355	Abce1	0.587141	5.90341	27.3636	4.47e-06	0.000113244
ENSMUSG00000038515	Grtp1	0.748937	4.42405	27.3502	4.49e-06	0.00011349
ENSMUSG00000025487	Psmd13	0.46049	6.37514	27.3011	4.56e-06	0.000115009
ENSMUSG00000032336	Nptn	0.58742	6.39395	27.2996	4.56e-06	0.000115009
ENSMUSG00000025868	Higd2a	0.594068	6.26622	27.2891	4.57e-06	0.000115233
ENSMUSG00000019782	Rwdd1	0.41835	4.49822	27.2529	4.63e-06	0.000116409
ENSMUSG00000037933	Bicd2	0.711644	5.4151	27.2466	4.64e-06	0.000116479
ENSMUSG00000003526	Prodh	-1.27949	7.75982	27.3658	4.66e-06	0.000116602
ENSMUSG00000006699	Cdc42	0.592262	7.71949	27.235	4.65e-06	0.000116602
ENSMUSG00000019054	Fis1	0.650854	6.37321	27.2077	4.7e-06	0.000117438
ENSMUSG00000021807	2700060E02Rik	0.418991	6.10045	27.1879	4.73e-06	0.000118021
ENSMUSG00000053581	Zfand2a	0.662943	4.48515	27.0879	4.88e-06	0.000121512
ENSMUSG00000028156	Eif4e	0.568091	5.25608	27.0822	4.89e-06	0.000121567
ENSMUSG00000014633	Cmc2	0.889717	3.36049	27.0599	4.92e-06	0.000122266
ENSMUSG00000037686	Aspg	1.11257	7.68342	27.0519	4.93e-06	0.000122409
ENSMUSG00000037225	Fgf2	-1.00367	3.67974	27.0068	5.01e-06	0.000124019
ENSMUSG00000021361	Tmem14c	0.609515	6.8084	26.9926	5.03e-06	0.000124413
ENSMUSG00000006517	Mvd	2.10877	4.96654	27.4139	5.09e-06	0.000125813
ENSMUSG00000022828	Gtf2e1	0.51138	3.7655	26.9451	5.11e-06	0.000125973
ENSMUSG00000021699	Pde4d	1.2746	1.68829	26.9338	5.13e-06	0.000126254
ENSMUSG00000027108	Ola1	0.699187	5.2043	26.9025	5.18e-06	0.000127178
ENSMUSG00000030521	Mphosph10	0.551143	3.54412	26.9028	5.18e-06	0.000127178
ENSMUSG00000023094	Msrb2	0.522086	3.97411	26.8928	5.19e-06	0.000127279
ENSMUSG00000030337	Vamp1	-0.557148	3.99743	26.8915	5.2e-06	0.000127279
ENSMUSG00000004748	Mtfp1	0.835019	4.43619	26.8687	5.23e-06	0.000127744
ENSMUSG00000020869	Lrrc59	0.802303	6.95519	26.8658	5.24e-06	0.000127744
ENSMUSG00000061273	Mmgt1	0.673963	4.6223	26.8631	5.24e-06	0.000127744
ENSMUSG00000063954	Hist2h2aa1	2.75388	-0.866294	26.868	5.23e-06	0.000127744
ENSMUSG00000024683	Mrpl16	0.497992	4.97069	26.8467	5.27e-06	0.00012807
ENSMUSG00000039759	Thap3	-0.672926	3.98503	26.8468	5.27e-06	0.00012807
ENSMUSG00000001663	Gstt1	-1.1893	7.71413	26.9148	5.31e-06	0.000128859
ENSMUSG00000072704	2700089E24Rik	0.616113	6.467	26.7826	5.38e-06	0.000130379
ENSMUSG00000075389	2810410L24Rik	-1.07528	2.65082	26.7779	5.39e-06	0.0001304
ENSMUSG00000040242	Fgfr1op2	0.439079	5.5567	26.7708	5.4e-06	0.000130521
ENSMUSG00000029993	Nfu1	0.499064	5.20813	26.7551	5.43e-06	0.000131003
ENSMUSG00000022194	Pabpn1	-0.455181	4.92181	26.7501	5.44e-06	0.000131041
ENSMUSG00000060002	Chpt1	0.694236	8.76446	26.7376	5.46e-06	0.000131391
ENSMUSG00000053332	Gas5	0.529962	6.23358	26.6958	5.53e-06	0.00013299
ENSMUSG00000022309	Angpt1	-2.31279	1.76691	26.7754	5.54e-06	0.000133107
ENSMUSG00000015671	Psma2	0.393154	6.40258	26.6136	5.68e-06	0.000135676
ENSMUSG00000036352	Ubac1	0.618194	5.06354	26.6129	5.68e-06	0.000135676
ENSMUSG00000078349	AW011738	-1.21306	0.691138	26.6193	5.67e-06	0.000135676
ENSMUSG00000030058	Copg1	0.555546	7.04534	26.6011	5.7e-06	0.00013601
ENSMUSG00000023068	Nus1	0.569816	5.59291	26.5574	5.78e-06	0.00013776
ENSMUSG00000042532	Golga7b	2.20351	1.75482	30.5902	5.84e-06	0.000138977
ENSMUSG00000039254	Pomt1	0.613583	5.099	26.5207	5.85e-06	0.000139028
ENSMUSG00000026888	Grb14	-1.08861	5.75831	26.6422	5.88e-06	0.000139469
ENSMUSG00000052563	D930048N14Rik	-0.964489	3.86337	26.4928	5.91e-06	0.000139916
ENSMUSG00000073557	Ppp1r12b	-0.749636	4.32885	26.4605	5.97e-06	0.000141196
ENSMUSG00000023106	Denr	0.468761	5.41211	26.453	5.98e-06	0.000141305
ENSMUSG00000050668	Gpatch11	0.506914	3.61111	26.4499	5.99e-06	0.000141305
ENSMUSG00000023092	Fhl1	1.02	6.69821	26.4917	6.07e-06	0.000143097
ENSMUSG00000020788	Atp2a3	0.910172	5.41506	26.3396	6.26e-06	0.000147281
ENSMUSG00000026150	Mff	0.344637	5.248	26.303	6.28e-06	0.000147597
ENSMUSG00000032064	Dixdc1	-1.24546	3.51997	26.3009	6.34e-06	0.000148825
ENSMUSG00000057388	Mrpl18	0.463277	5.72598	26.2478	6.39e-06	0.000149864
ENSMUSG00000032231	Anxa2	0.958058	8.97778	26.2363	6.42e-06	0.000150228
ENSMUSG00000018362	Kpna2	0.742601	4.58021	26.1995	6.49e-06	0.00015163
ENSMUSG00000026676	Ccdc3	-1.11866	4.857	26.3314	6.5e-06	0.00015163
ENSMUSG00000037072	Sep15	0.461191	7.3721	26.1956	6.5e-06	0.00015163
ENSMUSG00000035198	Tubg1	0.734094	5.4089	26.1867	6.52e-06	0.000151868
ENSMUSG00000044864	Ankrd50	0.434765	4.05422	26.163	6.57e-06	0.000152644
ENSMUSG00000056698	Elmod3	-0.725073	5.3998	26.1637	6.57e-06	0.000152644
ENSMUSG00000025762	Larp1b	0.483835	6.0914	26.139	6.62e-06	0.0001535
ENSMUSG00000074457	S100a16	0.674584	5.56126	26.1378	6.63e-06	0.0001535
ENSMUSG00000028330	Ncbp1	0.362288	4.98281	26.124	6.66e-06	0.000153988
ENSMUSG00000031422	Morf4l2	0.459845	6.31964	26.1073	6.69e-06	0.000154623
ENSMUSG00000033720	Sfxn5	0.469037	5.15021	26.0547	6.81e-06	0.000157085
ENSMUSG00000038375	Trp53inp2	1.17747	9.06965	26.0148	6.9e-06	0.000158935
ENSMUSG00000030917	Tmem159	-0.772897	4.10211	25.9477	7.05e-06	0.000162231
ENSMUSG00000035642	Aamdc	0.612579	4.94825	25.9425	7.06e-06	0.000162297
ENSMUSG00000045095	Magi1	0.453635	4.73107	25.9093	7.14e-06	0.000163852
ENSMUSG00000011752	Pgam1	0.564584	5.64558	25.9053	7.15e-06	0.000163856
ENSMUSG00000033352	Map2k4	0.400952	5.38145	25.8968	7.17e-06	0.000164098
ENSMUSG00000025613	Cct8	0.344151	6.88474	25.883	7.2e-06	0.000164617
ENSMUSG00000046182	Gsg1l	3.34984	-0.514775	25.8793	7.21e-06	0.000164617
ENSMUSG00000025092	Hspa12a	0.685521	5.38133	25.8699	7.23e-06	0.000164911
ENSMUSG00000029213	Commd8	0.383278	4.2964	25.8565	7.26e-06	0.000165421
ENSMUSG00000040482	Dxo	-0.589417	5.03688	25.8363	7.31e-06	0.000166302
ENSMUSG00000029726	Mepce	-0.445441	5.3823	25.7588	7.5e-06	0.000170348
ENSMUSG00000028953	Abcf2	0.483026	5.76977	25.724	7.58e-06	0.000171957
ENSMUSG00000091811	Prr24	-0.744571	3.97248	25.7222	7.59e-06	0.000171957
ENSMUSG00000025151	Maged1	0.562351	7.72133	25.7071	7.62e-06	0.000172591
ENSMUSG00000030652	Coq7	0.686297	4.91396	25.6622	7.74e-06	0.00017492
ENSMUSG00000001416	Cct3	0.510292	6.55277	25.598	7.9e-06	0.000178404
ENSMUSG00000022724	Mina	0.514647	4.17799	25.5877	7.93e-06	0.000178784
ENSMUSG00000027166	Dnajc24	0.529144	2.5726	25.5748	7.96e-06	0.000179313
ENSMUSG00000024120	Lrpprc	0.443508	6.57788	25.5568	8.01e-06	0.000180149
ENSMUSG00000021987	Mtmr6	0.579916	5.1316	25.5369	8.06e-06	0.000181097
ENSMUSG00000028636	Ppcs	0.637053	4.40818	25.5078	8.14e-06	0.000182602
ENSMUSG00000076432	Ywhaq	0.446605	6.01207	25.4817	8.21e-06	0.000183715
ENSMUSG00000097503	3110045C21Rik	1.68204	0.413509	25.4778	8.22e-06	0.000183717
ENSMUSG00000097101	1810034E14Rik	0.95477	2.94339	25.4528	8.29e-06	0.000185
ENSMUSG00000021932	Rnaseh2b	0.600451	2.66493	25.4445	8.31e-06	0.000185131
ENSMUSG00000042688	Mapk6	0.671235	5.83376	25.443	8.31e-06	0.000185131
ENSMUSG00000003038	Hmgn2	0.449909	5.29207	25.4183	8.38e-06	0.000186175
ENSMUSG00000052974	Cyp2f2	-3.21687	9.93687	25.8146	8.41e-06	0.000186353
ENSMUSG00000054455	Vapb	0.396612	6.71959	25.4078	8.41e-06	0.000186353
ENSMUSG00000031776	Arl2bp	0.594276	5.04221	25.4019	8.43e-06	0.000186486
ENSMUSG00000025968	Ndufs1	0.474884	7.0227	25.3572	8.55e-06	0.000189011
ENSMUSG00000002741	Ykt6	0.494026	6.38074	25.3471	8.58e-06	0.000189171
ENSMUSG00000054814	Usp46	0.538201	4.09726	25.3501	8.57e-06	0.000189171
ENSMUSG00000006732	Mettl1	0.864443	3.55579	25.3411	8.6e-06	0.00018931
ENSMUSG00000054619	Mettl7a1	-0.727053	8.35754	25.2843	8.76e-06	0.000192408
ENSMUSG00000001288	Rarg	-0.661882	4.83386	25.2587	8.83e-06	0.000193391
ENSMUSG00000032757	Bet1	0.642291	5.08811	25.2576	8.83e-06	0.000193391
ENSMUSG00000073490	AI607873	-1.08675	3.28511	25.2591	8.83e-06	0.000193391
ENSMUSG00000040767	Snrnp25	1.16798	2.1209	25.248	8.86e-06	0.000193718
ENSMUSG00000094090	Gm8494	2.51487	-1.73675	25.245	8.87e-06	0.000193718
ENSMUSG00000040822	1700123O20Rik	0.41448	4.67029	25.2323	8.91e-06	0.000194294
ENSMUSG00000044378	Slc15a5	3.34516	2.61931	25.4603	8.94e-06	0.00019469
ENSMUSG00000037331	Larp1	0.422497	7.26266	25.2182	8.95e-06	0.000194726
ENSMUSG00000024529	Lox	0.897382	4.28242	25.1565	9.13e-06	0.000198484
ENSMUSG00000039956	Mrap	1.01976	7.0897	25.2152	9.16e-06	0.000198914
ENSMUSG00000042670	Immp1l	0.65958	3.66974	25.1346	9.2e-06	0.000199436
ENSMUSG00000025076	Casp7	-0.395474	4.56247	25.1237	9.23e-06	0.000199913
ENSMUSG00000097162	2310010J17Rik	-0.733063	2.15334	25.0891	9.34e-06	0.000201963
ENSMUSG00000020455	Trim11	-0.392328	5.11114	25.0787	9.37e-06	0.000202409
ENSMUSG00000071644	Eef1g	0.657912	7.49848	25.0449	9.48e-06	0.000204436
ENSMUSG00000027165	B230118H07Rik	0.535849	4.08164	25.0327	9.51e-06	0.000204764
ENSMUSG00000033762	Recql4	1.81945	1.51222	25.0348	9.51e-06	0.000204764
ENSMUSG00000026749	Nek6	0.684668	5.99752	25.0281	9.53e-06	0.000204831
ENSMUSG00000036299	BC031181	0.553663	5.90896	24.9445	9.8e-06	0.000210319
ENSMUSG00000041079	Rwdd2b	0.660406	2.93874	24.8945	9.96e-06	0.000213566
ENSMUSG00000024104	Fam21	0.388834	6.07574	24.8799	1e-05	0.00021386
ENSMUSG00000032609	Klhdc8b	-0.83954	5.28824	24.8795	1e-05	0.00021386
ENSMUSG00000041895	Wipi1	0.704788	5.2031	24.8806	1e-05	0.00021386
ENSMUSG00000020523	Fam114a2	0.299542	5.41085	24.8695	1e-05	0.000214313
ENSMUSG00000024457	Trim26	-0.400126	5.57684	24.8288	1.02e-05	0.000216965
ENSMUSG00000032066	Bco2	-1.10165	4.17147	24.8144	1.02e-05	0.000217484
ENSMUSG00000097403	9230116N13Rik	-1.41825	-0.0469225	24.8145	1.02e-05	0.000217484
ENSMUSG00000024776	Stambpl1	1.3542	2.3342	24.807	1.03e-05	0.000217758
ENSMUSG00000075576	Gm12359	-1.5806	-0.835276	24.7849	1.03e-05	0.000219097
ENSMUSG00000003731	Kpna6	0.556509	6.1089	24.7705	1.04e-05	0.000219823
ENSMUSG00000050891	Tatdn1	0.77245	2.96706	24.7678	1.04e-05	0.000219823
ENSMUSG00000024360	Etf1	0.40282	6.4905	24.7527	1.04e-05	0.00022067
ENSMUSG00000057147	Dph6	0.645743	2.65662	24.7182	1.06e-05	0.000222947
ENSMUSG00000026519	Tmem63a	0.555302	5.14991	24.6906	1.07e-05	0.000224734
ENSMUSG00000027199	Gatm	-1.18466	2.07569	24.6817	1.07e-05	0.000225129
ENSMUSG00000001440	Kpnb1	0.463648	7.05813	24.6637	1.08e-05	0.000226217
ENSMUSG00000032892	Rangrf	0.935295	1.53921	24.6424	1.08e-05	0.000227534
ENSMUSG00000069135	Fgfr1op	0.539203	3.58241	24.6391	1.08e-05	0.000227534
ENSMUSG00000029642	Polr1d	0.581663	5.82267	24.6211	1.09e-05	0.000228364
ENSMUSG00000083844	2210015D19Rik	0.453239	3.97227	24.6213	1.09e-05	0.000228364
ENSMUSG00000036932	Aifm1	0.362758	6.62288	24.5987	1.1e-05	0.000229804
ENSMUSG00000002625	Akap8l	-0.442709	5.92662	24.5513	1.12e-05	0.000233131
ENSMUSG00000024533	Spire1	0.870285	3.37416	24.5484	1.12e-05	0.000233131
ENSMUSG00000041845	Rhod	0.696161	4.35452	24.5119	1.13e-05	0.000235708
ENSMUSG00000051154	Commd3	0.392989	5.79715	24.4264	1.16e-05	0.000242237
ENSMUSG00000041642	Kif21b	1.39126	2.48526	24.416	1.17e-05	0.000242801
ENSMUSG00000007415	Gatad1	0.39527	5.61533	24.3781	1.18e-05	0.000245033
ENSMUSG00000014856	Tmem208	0.67284	4.87278	24.3799	1.18e-05	0.000245033
ENSMUSG00000067194	Eif1ax	0.471417	5.15264	24.3199	1.21e-05	0.000249552
ENSMUSG00000093904	Tomm20	0.314425	5.64065	24.3074	1.21e-05	0.000250309
ENSMUSG00000025728	Pigq	0.40512	6.28168	24.2827	1.22e-05	0.000252001
ENSMUSG00000039195	1110008P14Rik	1.0842	5.12299	24.4186	1.22e-05	0.000252001
ENSMUSG00000020888	Dvl2	-0.592662	3.51723	24.2409	1.24e-05	0.000254753
ENSMUSG00000029186	Pi4k2b	0.531169	4.39034	24.2431	1.24e-05	0.000254753
ENSMUSG00000019437	Tlcd1	0.945541	5.97248	24.3041	1.24e-05	0.000255255
ENSMUSG00000023942	Slc29a1	-0.587993	7.62885	24.2282	1.24e-05	0.000255255
ENSMUSG00000024065	Ehd3	0.728695	5.4815	24.224	1.24e-05	0.000255314
ENSMUSG00000037148	Arhgap10	-0.730111	3.44141	24.1891	1.26e-05	0.000258019
ENSMUSG00000004846	Plod3	0.719286	6.49207	24.1846	1.26e-05	0.000258114
ENSMUSG00000063200	Nol7	0.45496	5.07127	24.1665	1.27e-05	0.000259383
ENSMUSG00000032698	Lmo2	-0.722133	3.41908	24.1477	1.28e-05	0.000260726
ENSMUSG00000006127	Inpp5k	-0.447992	5.29362	24.1349	1.28e-05	0.000261551
ENSMUSG00000056856	Jakmip3	1.81422	0.412096	24.102	1.3e-05	0.000264149
ENSMUSG00000073436	Eme2	0.733749	3.0659	24.0902	1.3e-05	0.000264896
ENSMUSG00000024953	Prdx5	0.732441	8.12935	24.0824	1.31e-05	0.000264981
ENSMUSG00000039016	Timm8b	0.494399	5.22423	24.0835	1.3e-05	0.000264981
ENSMUSG00000020326	Ccng1	0.744395	5.74193	24.0769	1.31e-05	0.000265169
ENSMUSG00000026387	Sctr	-1.61102	2.80511	24.1541	1.31e-05	0.000265731
ENSMUSG00000025532	Crcp	0.511184	4.72864	24.0618	1.31e-05	0.000265912
ENSMUSG00000045620	Odf3l1	2.2459	2.50978	27.8812	1.32e-05	0.000267282
ENSMUSG00000067787	Blcap	-0.474369	6.47076	24.0224	1.33e-05	0.000268843
ENSMUSG00000074093	Svip	0.677762	3.76499	24.0141	1.34e-05	0.00026929
ENSMUSG00000036632	Alg5	0.389853	5.24969	24.0079	1.34e-05	0.000269352
ENSMUSG00000052565	Hist1h1d	2.98002	-0.299923	24.0038	1.34e-05	0.000269352
ENSMUSG00000087445	Gm14286	-1.09764	2.36848	24.0034	1.34e-05	0.000269352
ENSMUSG00000004897	Hdgf	0.478503	7.71238	23.9963	1.34e-05	0.000269559
ENSMUSG00000021094	Dhrs7	0.812827	6.03268	23.9984	1.34e-05	0.000269559
ENSMUSG00000002379	Ndufa11	0.657918	6.14321	23.9904	1.35e-05	0.000269617
ENSMUSG00000029066	Mrpl20	0.607761	5.73367	23.9691	1.36e-05	0.000271251
ENSMUSG00000062797	l7Rn6	0.455257	3.79409	23.9019	1.39e-05	0.000277136
ENSMUSG00000035184	Fam124a	-0.792885	3.51032	23.8976	1.39e-05	0.000277226
ENSMUSG00000037613	Tnfrsf23	1.34924	1.69223	23.8916	1.39e-05	0.000277477
ENSMUSG00000038497	Tmco3	0.459649	4.01549	23.8556	1.41e-05	0.000280542
ENSMUSG00000038013	Wipf2	-0.401428	3.99312	23.8419	1.42e-05	0.000281526
ENSMUSG00000020955	Ap4s1	0.595509	3.65096	23.836	1.42e-05	0.000281545
ENSMUSG00000027011	Ube2e3	-0.32749	4.65675	23.8351	1.42e-05	0.000281545
ENSMUSG00000022472	Desi1	0.419296	5.6059	23.8279	1.42e-05	0.000281917
ENSMUSG00000052632	Asap2	0.672654	3.80012	23.8047	1.43e-05	0.000283809
ENSMUSG00000051319	1500011K16Rik	0.902552	4.48279	23.805	1.44e-05	0.000284423
ENSMUSG00000043993	2900052L18Rik	-1.02526	2.92629	23.7891	1.44e-05	0.000284676
ENSMUSG00000041202	Pla2g2d	-1.73355	1.82647	23.7541	1.46e-05	0.000287736
ENSMUSG00000048007	Timm8a1	0.882584	2.20174	23.7381	1.47e-05	0.000288973
ENSMUSG00000021178	Psmc1	0.348669	7.04949	23.7295	1.47e-05	0.000289498
ENSMUSG00000035713	Usp35	-0.950528	4.48024	23.754	1.48e-05	0.000290459
ENSMUSG00000031808	Slc27a1	-1.11158	8.32051	23.7324	1.48e-05	0.000290666
ENSMUSG00000084957	Bbip1	0.480329	3.4142	23.7076	1.48e-05	0.000290685
ENSMUSG00000042625	Safb2	-0.415779	6.33213	23.7041	1.48e-05	0.00029071
ENSMUSG00000030057	Cnbp	0.356959	7.87593	23.6574	1.51e-05	0.000294532
ENSMUSG00000035473	Galm	-0.349137	6.93267	23.6556	1.51e-05	0.000294532
ENSMUSG00000070407	Hs3st3b1	-0.791233	5.6339	23.6415	1.51e-05	0.000295614
ENSMUSG00000072946	Ptgr2	0.366966	6.60032	23.6321	1.52e-05	0.00029623
ENSMUSG00000027080	Med19	0.458933	3.83836	23.6263	1.52e-05	0.000296491
ENSMUSG00000097885	5031434O11Rik	-1.2599	2.02325	23.6154	1.53e-05	0.000297256
ENSMUSG00000056941	Commd7	0.303731	4.72894	23.6104	1.53e-05	0.000297443
ENSMUSG00000020647	Ncoa1	-0.455221	4.60384	23.6043	1.53e-05	0.000297731
ENSMUSG00000021711	Trappc13	0.423223	4.5375	23.5832	1.54e-05	0.00029921
ENSMUSG00000045410	Akr1e1	0.376069	5.35923	23.5791	1.55e-05	0.000299297
ENSMUSG00000079317	Trappc2	0.745665	2.35907	23.5713	1.55e-05	0.000299768
ENSMUSG00000019278	Dpep1	-1.08841	5.10233	23.708	1.55e-05	0.000299945
ENSMUSG00000066258	Trim12a	-0.571004	3.35315	23.5428	1.57e-05	0.000302014
ENSMUSG00000060317	Acnat2	3.25862	4.24951	23.746	1.57e-05	0.000302343
ENSMUSG00000044345	Marveld1	-0.47228	6.17186	23.5186	1.58e-05	0.000303839
ENSMUSG00000034729	Mrps10	0.365197	4.90212	23.5076	1.58e-05	0.000304652
ENSMUSG00000051950	B3galtl	0.786928	3.76043	23.5037	1.59e-05	0.000304727
ENSMUSG00000047222	Ear11	3.62284	0.220765	25.3639	1.6e-05	0.000306461
ENSMUSG00000001175	Calm1	0.415262	8.01951	23.4486	1.62e-05	0.000309795
ENSMUSG00000061306	Slc38a10	0.545195	7.58178	23.4314	1.63e-05	0.000311273
ENSMUSG00000021764	Ndufs4	0.474278	6.15081	23.4176	1.63e-05	0.000312401
ENSMUSG00000039640	Mrpl12	0.786733	6.91744	23.3816	1.65e-05	0.000315891
ENSMUSG00000029156	Sgcb	0.803034	4.00864	23.3737	1.66e-05	0.000316402
ENSMUSG00000029446	Psph	1.10435	3.48104	23.3786	1.66e-05	0.000316659
ENSMUSG00000026335	Pam	0.890583	6.07656	23.4091	1.67e-05	0.000317494
ENSMUSG00000032086	Bace1	0.469245	4.93927	23.3545	1.67e-05	0.000317494
ENSMUSG00000031489	Adrb3	-0.990949	8.8428	23.3387	1.68e-05	0.000318486
ENSMUSG00000026032	Ndufb3	0.595794	6.36993	23.3296	1.68e-05	0.000318862
ENSMUSG00000033499	Larp4b	0.377588	5.77528	23.3253	1.69e-05	0.000318862
ENSMUSG00000035314	Gdpd5	0.620562	3.50509	23.3227	1.69e-05	0.000318862
ENSMUSG00000040852	Plekhh2	1.00128	2.25008	23.3271	1.68e-05	0.000318862
ENSMUSG00000035325	Sec31a	0.366416	7.61147	23.3176	1.69e-05	0.000319076
ENSMUSG00000024359	Hspa9	0.518477	9.08579	23.2975	1.7e-05	0.000320932
ENSMUSG00000048578	Mlec	0.628561	7.50087	23.2892	1.71e-05	0.000321489
ENSMUSG00000019763	Rmnd1	0.378885	4.86173	23.2826	1.71e-05	0.00032188
ENSMUSG00000028785	Hpca	-3.86471	0.993709	23.4757	1.72e-05	0.000323356
ENSMUSG00000032942	Ucp3	1.07417	4.59132	23.3502	1.73e-05	0.000325238
ENSMUSG00000041117	Ccdc8	-1.02443	1.74773	23.2216	1.75e-05	0.000327236
ENSMUSG00000021550	2210016F16Rik	0.585663	5.28963	23.2074	1.75e-05	0.000328478
ENSMUSG00000016477	E2f3	0.525408	3.42788	23.1761	1.77e-05	0.000331139
ENSMUSG00000028145	Them4	0.556793	3.704	23.1745	1.77e-05	0.000331139
ENSMUSG00000029714	Gigyf1	-0.510448	5.98336	23.1757	1.77e-05	0.000331139
ENSMUSG00000040272	Accs	-0.868981	3.44392	23.1633	1.78e-05	0.00033205
ENSMUSG00000035517	Tdrd7	0.35269	5.68141	23.1269	1.8e-05	0.000335849
ENSMUSG00000029575	Mmab	0.762268	5.30528	23.1177	1.81e-05	0.000336544
ENSMUSG00000032301	Psma4	0.330527	6.76097	23.1144	1.81e-05	0.000336572
ENSMUSG00000017670	Elmo2	0.458792	4.87198	23.1009	1.82e-05	0.000337444
ENSMUSG00000042229	Rabif	0.434267	4.11677	23.1008	1.82e-05	0.000337444
ENSMUSG00000039037	St6galnac5	-1.88795	1.65987	26.1808	1.83e-05	0.00033823
ENSMUSG00000026413	Pkp1	3.45801	-1.16875	23.0693	1.84e-05	0.000340201
ENSMUSG00000085558	4930412C18Rik	-1.0956	2.60926	23.0678	1.84e-05	0.000340201
ENSMUSG00000037994	Slc9b2	-1.37026	0.678421	23.0604	1.84e-05	0.000340355
ENSMUSG00000063919	Srrm4	1.69844	2.24756	23.0615	1.84e-05	0.000340355
ENSMUSG00000071014	Ndufb6	0.551208	5.77141	23.0247	1.87e-05	0.00034416
ENSMUSG00000090523	Gypc	0.937338	4.57057	23.0621	1.87e-05	0.000344303
ENSMUSG00000038319	Kcnh2	1.47761	3.10078	23.0987	1.88e-05	0.000346426
ENSMUSG00000070730	Rmdn3	0.558971	6.22804	22.9936	1.89e-05	0.000346768
ENSMUSG00000029623	Pdap1	0.408184	6.23596	22.9875	1.89e-05	0.00034713
ENSMUSG00000001999	Blvra	0.470958	4.5259	22.9813	1.89e-05	0.000347507
ENSMUSG00000030738	Eif3c	0.340496	7.49248	22.9617	1.91e-05	0.000349121
ENSMUSG00000003420	Fcgrt	-0.5543	8.21504	22.9519	1.91e-05	0.000349939
ENSMUSG00000002068	Ccne1	1.32904	2.03449	22.9357	1.92e-05	0.000351505
ENSMUSG00000039196	Orm1	1.53425	9.02191	23.0715	1.93e-05	0.000351505
ENSMUSG00000032193	Ldlr	1.17845	7.36041	23.0561	1.93e-05	0.000352123
ENSMUSG00000030127	Cops7a	0.392236	6.2444	22.9133	1.94e-05	0.000353122
ENSMUSG00000097354	2310001H17Rik	-1.2531	3.26347	22.9144	1.94e-05	0.000353412
ENSMUSG00000038214	Bend3	0.537774	3.08427	22.8376	1.99e-05	0.000361291
ENSMUSG00000045216	Hs6st1	-0.584182	7.20372	22.8269	2e-05	0.000362249
ENSMUSG00000026509	Capn2	0.408699	7.3151	22.8095	2.01e-05	0.000363792
ENSMUSG00000028744	Pqlc2	0.509686	4.18308	22.8086	2.01e-05	0.000363792
ENSMUSG00000031600	Vps37a	0.386852	4.84696	22.7962	2.02e-05	0.000364972
ENSMUSG00000027274	Mkks	0.581773	2.89257	22.7849	2.03e-05	0.000366009
ENSMUSG00000038546	Ranbp9	0.475629	5.60943	22.7443	2.05e-05	0.000370393
ENSMUSG00000022817	Itgb5	0.659609	7.16442	22.714	2.08e-05	0.000373555
ENSMUSG00000036534	Slc38a7	-0.388174	4.87237	22.7136	2.08e-05	0.000373555
ENSMUSG00000036613	Tssc1	0.700565	3.68027	22.7081	2.08e-05	0.000373882
ENSMUSG00000024732	Ccdc86	0.776512	3.60975	22.6919	2.09e-05	0.000375587
ENSMUSG00000008450	Nutf2	0.590416	3.28728	22.673	2.11e-05	0.00037728
ENSMUSG00000044715	Gskip	0.5092	3.63229	22.6759	2.1e-05	0.00037728
ENSMUSG00000027286	Lrrc57	0.475536	3.49411	22.6581	2.12e-05	0.00037863
ENSMUSG00000027983	Cyp2u1	0.828175	4.88497	22.6567	2.12e-05	0.00037863
ENSMUSG00000030662	Ipo5	0.344756	6.20996	22.6523	2.12e-05	0.000378829
ENSMUSG00000032199	Polr2m	0.37171	5.64565	22.6476	2.12e-05	0.000379054
ENSMUSG00000035772	Mrps2	0.38092	5.36548	22.6314	2.14e-05	0.000380788
ENSMUSG00000020102	Slc16a7	-1.015	5.26908	22.7226	2.14e-05	0.000381202
ENSMUSG00000075467	Dnlz	0.619223	4.97952	22.6071	2.15e-05	0.000382846
ENSMUSG00000036528	Ppfibp2	0.754332	4.68765	22.5583	2.19e-05	0.000387874
ENSMUSG00000042116	Vwa1	-0.768059	3.9455	22.5547	2.19e-05	0.000387874
ENSMUSG00000042340	Ctf1	-1.02276	2.33456	22.5646	2.19e-05	0.000387874
ENSMUSG00000054312	Mrps21	0.549474	5.31785	22.5555	2.19e-05	0.000387874
ENSMUSG00000058624	Gda	0.866213	5.52714	22.5942	2.19e-05	0.000387874
ENSMUSG00000021902	Phf7	-0.61043	3.29516	22.5359	2.21e-05	0.00038961
ENSMUSG00000030560	Ctsc	-0.820377	6.34895	22.5496	2.21e-05	0.00038961
ENSMUSG00000042333	Tnfrsf14	-1.0889	1.48598	22.5233	2.22e-05	0.000390919
ENSMUSG00000022040	Ephx2	-0.727676	9.69631	22.5201	2.22e-05	0.00039097
ENSMUSG00000050174	Nudt6	-0.547403	3.34179	22.5147	2.22e-05	0.000391311
ENSMUSG00000018899	Irf1	-0.55784	5.56743	22.5048	2.23e-05	0.000391638
ENSMUSG00000020894	Vamp2	-0.380741	6.35629	22.5046	2.23e-05	0.000391638
ENSMUSG00000049086	Bmyc	1.05666	3.83503	22.5592	2.23e-05	0.000391638
ENSMUSG00000038539	Atf5	0.911269	8.65072	22.496	2.24e-05	0.000392286
ENSMUSG00000022905	Kpna1	0.52467	4.91404	22.471	2.26e-05	0.000394901
ENSMUSG00000038446	Cdc40	-0.442029	4.74167	22.4729	2.26e-05	0.000394901
ENSMUSG00000039414	Heatr5b	0.519188	4.40455	22.4534	2.27e-05	0.000396911
ENSMUSG00000007888	Crlf1	1.64292	1.24439	22.4454	2.28e-05	0.000397502
ENSMUSG00000051007	Pddc1	-0.504715	4.65005	22.4434	2.28e-05	0.000397502
ENSMUSG00000030879	Mrpl17	0.663094	5.93855	22.4138	2.3e-05	0.000401195
ENSMUSG00000031585	Gtf2e2	0.382928	3.38147	22.3557	2.35e-05	0.000408911
ENSMUSG00000058706	0610030E20Rik	-0.498513	5.05771	22.3074	2.39e-05	0.000415371
ENSMUSG00000003662	Ciao1	0.356842	5.47222	22.3028	2.39e-05	0.000415629
ENSMUSG00000054452	Aes	0.706913	9.17671	22.2842	2.41e-05	0.000417502
ENSMUSG00000097589	Dleu2	-0.589925	3.44364	22.279	2.41e-05	0.000417839
ENSMUSG00000024966	Stip1	0.529988	6.23753	22.2427	2.44e-05	0.000421888
ENSMUSG00000038910	Plcl2	-0.51139	3.99001	22.2471	2.44e-05	0.000421888
ENSMUSG00000042590	Ipo11	0.383907	4.04336	22.243	2.44e-05	0.000421888
ENSMUSG00000026087	Mrpl30	0.422224	5.87547	22.2374	2.45e-05	0.000422258
ENSMUSG00000028745	Capzb	0.371036	7.23319	22.2301	2.45e-05	0.000422911
ENSMUSG00000046961	Gpr156	1.44224	2.36708	25.0912	2.46e-05	0.00042418
ENSMUSG00000029247	Paics	0.314269	7.39408	22.212	2.47e-05	0.000424335
ENSMUSG00000079470	Utp14b	1.24179	1.89415	22.2133	2.47e-05	0.000424335
ENSMUSG00000024818	Slc25a45	-0.639977	4.87045	22.1717	2.5e-05	0.000429876
ENSMUSG00000033615	Cplx1	-2.25845	-1.54048	23.737	2.51e-05	0.000430206
ENSMUSG00000032396	Dis3l	0.4319	4.56022	22.1436	2.53e-05	0.000433247
ENSMUSG00000022241	Tars	0.413334	6.56828	22.1359	2.53e-05	0.000433986
ENSMUSG00000019795	Pcmt1	0.30565	5.34238	22.1284	2.54e-05	0.000434287
ENSMUSG00000030630	Fah	0.49275	9.42883	22.1291	2.54e-05	0.000434287
ENSMUSG00000020198	Ap3d1	0.411391	6.87931	22.1028	2.56e-05	0.000437738
ENSMUSG00000026176	Ctdsp1	-0.33006	7.43675	22.0952	2.57e-05	0.000438463
ENSMUSG00000058966	Fam57b	1.05987	3.98942	22.1441	2.59e-05	0.000440964
ENSMUSG00000024146	Cript	0.492883	4.55481	22.0585	2.6e-05	0.000442447
ENSMUSG00000039067	Psmd7	0.30536	6.37781	22.0581	2.6e-05	0.000442447
ENSMUSG00000061130	Ppm1b	-0.366195	6.36429	22.0589	2.6e-05	0.000442447
ENSMUSG00000021175	Cdca7l	1.59255	1.6043	22.0192	2.64e-05	0.000448034
ENSMUSG00000042660	Wdr55	0.481065	3.91099	22.0151	2.64e-05	0.000448194
ENSMUSG00000048537	Phldb1	-0.600527	7.52236	22.0127	2.64e-05	0.000448194
ENSMUSG00000021495	Fam193b	-0.538293	6.57721	21.9669	2.69e-05	0.000454605
ENSMUSG00000028458	Tesk1	0.669262	5.52869	21.9637	2.69e-05	0.000454605
ENSMUSG00000049739	Zfp646	-0.494753	4.31718	21.9636	2.69e-05	0.000454605
ENSMUSG00000039703	Nploc4	0.406005	6.71678	21.9552	2.7e-05	0.000455496
ENSMUSG00000085449	Gm15520	2.99369	-1.83932	26.7039	2.7e-05	0.000456078
ENSMUSG00000044573	Acp1	0.361388	5.55686	21.9342	2.72e-05	0.000457977
ENSMUSG00000022557	Bop1	0.578683	5.32605	21.9075	2.74e-05	0.000461669
ENSMUSG00000026112	Coa5	0.443676	6.62086	21.9056	2.74e-05	0.000461669
ENSMUSG00000004698	Hdac9	1.53117	1.50265	21.8922	2.76e-05	0.000462958
ENSMUSG00000041926	Rnpep	0.554063	6.13427	21.8948	2.75e-05	0.000462958
ENSMUSG00000059866	Tnip2	-0.492786	3.7252	21.8883	2.76e-05	0.00046315
ENSMUSG00000038827	BC026590	0.667004	2.82098	21.8495	2.8e-05	0.000468998
ENSMUSG00000021276	Cinp	0.375128	4.09514	21.843	2.8e-05	0.000469629
ENSMUSG00000038170	Pde4dip	-0.521875	5.79912	21.8128	2.83e-05	0.000474135
ENSMUSG00000024878	Cbwd1	0.642476	2.70933	21.7873	2.86e-05	0.000477919
ENSMUSG00000019872	Smpdl3a	0.520012	5.8105	21.7832	2.86e-05	0.000478122
ENSMUSG00000029397	Rchy1	-0.352437	4.80506	21.7807	2.87e-05	0.000478122
ENSMUSG00000038180	Spag4	0.967358	0.940784	21.7777	2.87e-05	0.000478182
ENSMUSG00000090610	Gm3571	3.3112	-0.970808	21.7521	2.89e-05	0.000482017
ENSMUSG00000022471	Xrcc6	0.38488	4.30037	21.7408	2.91e-05	0.000483474
ENSMUSG00000085795	Zfp703	-0.709395	5.45667	21.7362	2.91e-05	0.000483801
ENSMUSG00000039168	Dap	0.560066	7.7412	21.7057	2.94e-05	0.000488506
ENSMUSG00000001707	Eef1e1	0.743222	3.00983	21.6953	2.95e-05	0.000489372
ENSMUSG00000031618	Nr3c2	-0.767147	3.10375	21.6956	2.95e-05	0.000489372
ENSMUSG00000006784	Ttc25	2.24749	1.52707	21.729	2.98e-05	0.000494027
ENSMUSG00000020307	Cdc34	0.825891	5.98484	21.6788	3e-05	0.000495262
ENSMUSG00000025137	Pcyt2	0.637129	9.13168	21.6543	3e-05	0.000495262
ENSMUSG00000078622	Ccdc47	0.468636	6.16177	21.6504	3e-05	0.000495262
ENSMUSG00000060904	Arl1	0.391536	6.48944	21.6259	3.02e-05	0.000499059
ENSMUSG00000024997	Prdx3	0.461578	6.93048	21.6232	3.03e-05	0.000499064
ENSMUSG00000071553	Cpa2	1.73753	-0.223587	23.0932	3.06e-05	0.000503128
ENSMUSG00000024799	Tm7sf2	1.16072	6.8913	21.7246	3.07e-05	0.00050423
ENSMUSG00000025792	Slc25a10	1.27786	8.63038	21.6667	3.07e-05	0.00050423
ENSMUSG00000084880	Gm14872	-1.21107	1.31137	21.5569	3.1e-05	0.000508891
ENSMUSG00000021360	Gcnt2	0.750113	4.95754	21.5343	3.12e-05	0.000512449
ENSMUSG00000021930	Spryd7	0.531014	4.25717	21.5146	3.14e-05	0.000514587
ENSMUSG00000022111	Uchl3	0.449348	3.60087	21.5162	3.14e-05	0.000514587
ENSMUSG00000047866	Lonp2	0.448195	8.33686	21.5185	3.14e-05	0.000514587
ENSMUSG00000053411	Cbx7	-0.930315	4.93452	21.5701	3.15e-05	0.000515662
ENSMUSG00000027556	Car1	-1.2906	2.33799	21.5019	3.16e-05	0.00051594
ENSMUSG00000021290	2010107E04Rik	0.608001	6.11484	21.4637	3.2e-05	0.00052239
ENSMUSG00000019929	Dcn	-0.927755	8.32209	21.4404	3.23e-05	0.000526206
ENSMUSG00000043421	Hilpda	1.06919	2.94456	21.4364	3.23e-05	0.000526463
ENSMUSG00000031429	Psmd10	0.384193	3.5354	21.4286	3.24e-05	0.000527411
ENSMUSG00000096966	Gm18336	2.6384	-2.59013	25.9536	3.25e-05	0.000528832
ENSMUSG00000036473	Tbc1d24	0.468903	4.49653	21.4151	3.26e-05	0.000528962
ENSMUSG00000060600	Eno3	-0.734875	3.24732	21.3973	3.28e-05	0.000531291
ENSMUSG00000051234	Rnf7	0.40484	5.02663	21.3872	3.29e-05	0.000532703
ENSMUSG00000028049	Scamp3	0.529771	6.16184	21.3831	3.29e-05	0.000532975
ENSMUSG00000028719	Cmpk1	0.578407	5.99926	21.3569	3.32e-05	0.000537421
ENSMUSG00000086859	2810008D09Rik	-0.851348	3.44262	21.3504	3.33e-05	0.000538156
ENSMUSG00000023019	Gpd1	1.20247	9.94569	21.3316	3.35e-05	0.000540737
ENSMUSG00000028295	Smim8	0.526918	3.02575	21.3326	3.35e-05	0.000540737
ENSMUSG00000025869	Nop16	0.49017	4.63458	21.3193	3.37e-05	0.000542587
ENSMUSG00000052428	Tmco1	0.361303	6.07514	21.3166	3.37e-05	0.000542613
ENSMUSG00000036040	Adamtsl2	1.74992	3.81347	21.5434	3.39e-05	0.000544573
ENSMUSG00000002332	Dhrs1	0.455031	6.80656	21.2762	3.42e-05	0.000549375
ENSMUSG00000028466	Creb3	0.444788	5.54701	21.2687	3.43e-05	0.00055034
ENSMUSG00000028402	Mpdz	0.625513	5.24224	21.2134	3.5e-05	0.000559639
ENSMUSG00000030779	Rbbp6	-0.486087	5.58048	21.2183	3.49e-05	0.000559639
ENSMUSG00000041238	Rbbp8	0.571681	2.94322	21.2133	3.5e-05	0.000559639
ENSMUSG00000026111	Unc50	0.26809	4.96499	21.1673	3.55e-05	0.000568276
ENSMUSG00000024999	Noc3l	0.516448	3.15494	21.1457	3.58e-05	0.000571584
ENSMUSG00000026037	Orc2	0.589079	3.61249	21.1263	3.6e-05	0.000574983
ENSMUSG00000000056	Narf	0.464272	5.32305	21.113	3.62e-05	0.000577173
ENSMUSG00000020994	Pnn	-0.499778	6.12599	21.1092	3.63e-05	0.000577434
ENSMUSG00000028641	Lepre1	0.607513	4.9359	21.0973	3.64e-05	0.000579337
ENSMUSG00000085912	Trp53cor1	2.56986	-0.0947331	21.091	3.65e-05	0.000580102
ENSMUSG00000032577	Mapkapk3	0.700357	3.45096	21.086	3.66e-05	0.00058062
ENSMUSG00000029203	Ube2k	0.356207	5.72461	21.0788	3.66e-05	0.000581577
ENSMUSG00000025503	Taldo1	0.710719	8.16067	21.0684	3.68e-05	0.000582792
ENSMUSG00000059796	Eif4a1	0.456172	8.05345	21.0678	3.68e-05	0.000582792
ENSMUSG00000037363	Letm2	-0.677623	2.14521	21.0042	3.76e-05	0.000595184
ENSMUSG00000070436	Serpinh1	1.13055	7.98102	21.0761	3.76e-05	0.000595184
ENSMUSG00000028760	Eif4g3	0.482955	6.23475	20.9885	3.78e-05	0.000597725
ENSMUSG00000032085	Tagln	-1.32187	5.72907	21.198	3.79e-05	0.000597725
ENSMUSG00000038722	Bud31	0.420852	5.40498	20.9813	3.79e-05	0.00059821
ENSMUSG00000066232	Ipo7	0.559829	5.83903	20.9782	3.8e-05	0.000598345
ENSMUSG00000036655	Colec11	-1.15641	3.97479	21.0299	3.8e-05	0.00059892
ENSMUSG00000001021	S100a3	4.0199	-1.84413	25.3115	3.82e-05	0.000600815
ENSMUSG00000004508	Gab2	0.531716	4.51543	20.9487	3.84e-05	0.000602832
ENSMUSG00000073802	Cdkn2b	1.11854	2.24292	20.947	3.84e-05	0.000602832
ENSMUSG00000096956	0610007N19Rik	-0.837387	3.55202	20.9303	3.86e-05	0.000605884
ENSMUSG00000039308	Ndst2	-0.300984	4.98703	20.9033	3.9e-05	0.00061114
ENSMUSG00000021114	Atp6v1d	0.370819	5.42128	20.8961	3.91e-05	0.000612163
ENSMUSG00000032557	Uba5	0.439692	5.04302	20.8894	3.92e-05	0.000613086
ENSMUSG00000037172	E330009J07Rik	-0.647071	2.88577	20.8737	3.94e-05	0.000615962
ENSMUSG00000024889	Rce1	-0.534065	3.48813	20.855	3.97e-05	0.000619501
ENSMUSG00000039629	Strip2	-1.25737	1.61866	20.8519	3.97e-05	0.000619645
ENSMUSG00000005251	Ripk4	-1.91722	2.25898	20.9112	3.99e-05	0.000621971
ENSMUSG00000033405	Nudt15	1.11733	0.269624	20.8383	3.99e-05	0.000621971
ENSMUSG00000063684	Gm13910	0.920027	0.649105	20.8317	4e-05	0.000622452
ENSMUSG00000038777	Sema6c	-0.974832	1.8603	20.8266	4.01e-05	0.000623045
ENSMUSG00000034327	Kctd9	0.4855	3.61735	20.7983	4.05e-05	0.00062823
ENSMUSG00000042251	Pm20d1	0.837881	6.62217	20.8076	4.04e-05	0.00062823
ENSMUSG00000025558	Dock9	-0.546368	5.40031	20.7884	4.06e-05	0.000629891
ENSMUSG00000020075	Ddx21	0.397085	5.28434	20.7801	4.07e-05	0.000631192
ENSMUSG00000029335	Bmp3	1.34069	4.01302	20.9417	4.08e-05	0.000631579
ENSMUSG00000090486	BC035947	-1.35038	2.2435	20.7697	4.09e-05	0.000632431
ENSMUSG00000020472	Zkscan17	-0.549579	4.75907	20.7354	4.14e-05	0.000639619
ENSMUSG00000089715	Cbx6	-0.667392	4.99952	20.73	4.15e-05	0.000640272
ENSMUSG00000038267	Slc22a23	-0.53844	6.09646	20.7235	4.16e-05	0.000640642
ENSMUSG00000055900	Tmem69	0.518077	3.93566	20.7253	4.15e-05	0.000640642
ENSMUSG00000005469	Prkaca	0.553181	6.95062	20.696	4.2e-05	0.000646154
ENSMUSG00000031479	Vps36	0.33846	4.97603	20.6945	4.2e-05	0.000646154
ENSMUSG00000031799	Tpm4	0.627254	6.89951	20.6774	4.22e-05	0.000648966
ENSMUSG00000097249	Gm26889	-2.12783	-1.96908	24.9149	4.22e-05	0.000648966
ENSMUSG00000027332	Ivd	-0.48756	8.23993	20.6668	4.24e-05	0.000650655
ENSMUSG00000057606	Colq	2.55305	-1.45113	20.6505	4.26e-05	0.000653512
ENSMUSG00000058396	Gpr182	-0.662594	4.2472	20.6329	4.29e-05	0.000657051
ENSMUSG00000019731	Slc35e1	0.412588	5.63534	20.6144	4.32e-05	0.000660821
ENSMUSG00000079108	Srp54b	0.601234	2.48409	20.6115	4.32e-05	0.000660932
ENSMUSG00000003032	Klf4	-1.0632	4.7104	20.7132	4.34e-05	0.000662926
ENSMUSG00000027439	Gzf1	-0.433691	5.43695	20.5908	4.36e-05	0.000664672
ENSMUSG00000025786	Zdhhc3	0.301507	5.57661	20.5814	4.37e-05	0.000666343
ENSMUSG00000046062	Ppp1r15b	-0.373517	6.41038	20.5478	4.42e-05	0.000672613
ENSMUSG00000047187	Rab2a	0.307298	6.51399	20.5501	4.42e-05	0.000672613
ENSMUSG00000079555	Haus3	0.866202	2.36968	20.5487	4.42e-05	0.000672613
ENSMUSG00000028668	Tceb3	0.346356	5.76828	20.5141	4.48e-05	0.000680156
ENSMUSG00000021951	N6amt2	0.736787	3.25237	20.485	4.52e-05	0.00068666
ENSMUSG00000033379	Atp6v0b	0.477807	6.48595	20.4711	4.55e-05	0.000689467
ENSMUSG00000028150	Rorc	-1.39644	5.75413	20.6773	4.55e-05	0.000689837
ENSMUSG00000034377	Tulp4	0.266075	4.78534	20.4506	4.58e-05	0.000693361
ENSMUSG00000022099	Dmtn	0.717804	4.97611	20.4455	4.59e-05	0.000693489
ENSMUSG00000029447	Cct6a	0.407517	6.68538	20.4453	4.59e-05	0.000693489
ENSMUSG00000028124	Gclm	0.460412	6.88577	20.4298	4.61e-05	0.000696748
ENSMUSG00000025813	Homer2	0.917296	4.27663	20.4271	4.62e-05	0.000696837
ENSMUSG00000040370	Lyrm5	0.675689	5.52925	20.3968	4.67e-05	0.000703791
ENSMUSG00000071757	Zhx2	-0.354162	5.02167	20.3931	4.67e-05	0.000704132
ENSMUSG00000044712	Slc38a6	-0.51933	3.59787	20.3851	4.69e-05	0.000704971
ENSMUSG00000031891	Hsd11b2	-1.95386	-1.17124	21.7222	4.7e-05	0.000705664
ENSMUSG00000027217	Tspan18	0.905512	4.62674	20.4223	4.7e-05	0.000706232
ENSMUSG00000028284	Map3k7	0.359473	5.3656	20.3587	4.73e-05	0.000709842
ENSMUSG00000006418	Rnf114	-0.255244	6.15838	20.3483	4.75e-05	0.000710698
ENSMUSG00000021822	Plau	-0.728639	4.58844	20.351	4.74e-05	0.000710698
ENSMUSG00000045875	Adra1a	0.866993	2.67344	20.3484	4.75e-05	0.000710698
ENSMUSG00000025745	Hadha	0.46605	8.55393	20.324	4.79e-05	0.000715691
ENSMUSG00000026315	Serpinb8	-1.01073	2.69567	20.3243	4.79e-05	0.000715691
ENSMUSG00000022323	Hrsp12	0.631888	8.38398	20.3073	4.82e-05	0.000719172
ENSMUSG00000048076	Arf1	0.317928	7.97001	20.3021	4.83e-05	0.000719499
ENSMUSG00000030259	Rassf8	0.438675	4.90321	20.2968	4.84e-05	0.000720257
ENSMUSG00000079588	Tmem182	1.08262	5.81394	20.4357	4.84e-05	0.000720421
ENSMUSG00000020251	Glt8d2	-1.27225	1.61275	20.2773	4.87e-05	0.000724083
ENSMUSG00000042256	Ptchd4	1.6333	0.086575	24.3495	4.88e-05	0.000724882
ENSMUSG00000022255	Mtdh	0.468041	5.57986	20.2681	4.89e-05	0.000725264
ENSMUSG00000027380	Acoxl	2.55638	-1.23367	20.2618	4.9e-05	0.000726292
ENSMUSG00000042073	Abhd14b	-0.554939	7.75927	20.2513	4.92e-05	0.000728431
ENSMUSG00000034714	Ttyh2	0.417377	6.49588	20.2439	4.93e-05	0.000729766
ENSMUSG00000021037	Ahsa1	0.442966	6.10007	20.2361	4.94e-05	0.000730934
ENSMUSG00000036948	BC037034	-0.449517	4.6125	20.2348	4.95e-05	0.000730934
ENSMUSG00000087660	B230398E01Rik	-1.60813	-0.216556	20.1864	5.03e-05	0.00074309
ENSMUSG00000028367	Txn1	-0.349862	7.27321	20.1805	5.04e-05	0.000744044
ENSMUSG00000039599	Fam149b	0.304507	5.11133	20.1739	5.05e-05	0.000745179
ENSMUSG00000029048	Rer1	0.327634	6.8616	20.1664	5.07e-05	0.000746576
ENSMUSG00000032911	Cspg4	1.22789	5.09487	20.3328	5.08e-05	0.000748162
ENSMUSG00000056666	Retsat	-0.86098	8.55092	20.1454	5.11e-05	0.000750968
ENSMUSG00000024587	Nars	0.429579	6.80307	20.1288	5.14e-05	0.000754497
ENSMUSG00000029364	Wsb2	0.371672	6.13772	20.1254	5.14e-05	0.000754497
ENSMUSG00000039740	Alg2	0.526679	4.50439	20.1273	5.14e-05	0.000754497
ENSMUSG00000017686	Rhot1	0.377024	5.25404	20.1221	5.15e-05	0.000754521
ENSMUSG00000020349	Ppp2ca	0.465229	7.08491	20.1208	5.15e-05	0.000754521
ENSMUSG00000021824	Ap3m1	0.539891	6.08607	20.1162	5.16e-05	0.00075513
ENSMUSG00000034345	Gtf2h5	0.514103	5.48814	20.0979	5.19e-05	0.000759499
ENSMUSG00000046447	Camk2n1	-0.987889	6.24976	20.1986	5.2e-05	0.000759546
ENSMUSG00000072893	4933439C10Rik	-1.06917	3.37048	20.1008	5.2e-05	0.000759737
ENSMUSG00000029782	Tmem209	0.493781	3.85228	20.0784	5.23e-05	0.000762938
ENSMUSG00000024414	Mrpl27	0.460671	5.19063	20.0521	5.28e-05	0.000769538
ENSMUSG00000032584	Mst1r	-0.630342	4.54249	20.0412	5.3e-05	0.000771927
ENSMUSG00000028568	Btf3l4	0.377565	4.20672	20.0307	5.32e-05	0.000774217
ENSMUSG00000019880	Rspo3	-1.77341	1.36768	20.0278	5.33e-05	0.000774334
ENSMUSG00000066800	Rnasel	-0.937536	3.57384	20.0257	5.33e-05	0.000774334
ENSMUSG00000028600	Podn	-0.93513	6.53511	20.0479	5.44e-05	0.000787691
ENSMUSG00000038429	Usp5	0.513131	6.83514	19.9726	5.43e-05	0.000787691
ENSMUSG00000027091	Zc3h15	0.321896	5.49239	19.9591	5.46e-05	0.000790534
ENSMUSG00000021786	Oxsm	0.420653	4.97362	19.9466	5.48e-05	0.000792788
ENSMUSG00000031816	Mthfsd	0.430295	4.51494	19.9417	5.49e-05	0.000793558
ENSMUSG00000096935	1700113A16Rik	-0.949825	1.29787	19.9387	5.5e-05	0.000793759
ENSMUSG00000002102	Psmc3	0.366065	7.13457	19.9278	5.52e-05	0.000796233
ENSMUSG00000045160	Bola3	0.599071	5.58707	19.9145	5.55e-05	0.000799428
ENSMUSG00000038754	Elovl3	3.80613	6.83395	20.171	5.61e-05	0.000807248
ENSMUSG00000086868	Gm15883	-2.75482	0.185138	19.8735	5.63e-05	0.000809982
ENSMUSG00000050323	Ndufaf6	0.546472	3.28997	19.8663	5.64e-05	0.000811427
ENSMUSG00000058258	Idi1	1.34458	3.66842	19.9746	5.66e-05	0.000813082
ENSMUSG00000078812	Eif5a	0.591503	8.51047	19.8234	5.73e-05	0.000822762
ENSMUSG00000003810	Mast2	0.392849	5.40145	19.813	5.75e-05	0.000825169
ENSMUSG00000025981	Coq10b	0.598355	4.91611	19.7858	5.81e-05	0.000832445
ENSMUSG00000032356	Rasgrf1	-2.37613	-1.32357	21.0541	5.81e-05	0.000832445
ENSMUSG00000007458	M6pr	0.314203	7.09626	19.7813	5.82e-05	0.000832646
ENSMUSG00000029198	Grpel1	0.429842	6.98572	19.7686	5.85e-05	0.000835796
ENSMUSG00000024234	Mtpap	0.49271	4.26696	19.757	5.87e-05	0.000838629
ENSMUSG00000056133	Gm9992	-1.67798	1.04051	19.743	5.9e-05	0.000842202
ENSMUSG00000026456	Cyb5r1	0.571216	5.06724	19.7323	5.92e-05	0.000844809
ENSMUSG00000021771	Vdac2	0.305211	6.89563	19.6907	6.01e-05	0.000856881
ENSMUSG00000040987	Mill2	-0.906998	2.77741	19.6795	6.04e-05	0.000859682
ENSMUSG00000030888	Rrp8	0.523629	3.83814	19.6708	6.06e-05	0.000861687
ENSMUSG00000024012	Mtch1	0.4781	7.17636	19.6485	6.11e-05	0.000867331
ENSMUSG00000025358	Cdk2	-0.374127	4.45525	19.6418	6.12e-05	0.000867331
ENSMUSG00000030731	Syt3	-0.849253	2.40289	19.6437	6.12e-05	0.000867331
ENSMUSG00000036371	Serbp1	0.398396	7.2832	19.6439	6.12e-05	0.000867331
ENSMUSG00000040018	Cox15	0.43369	5.02604	19.6469	6.11e-05	0.000867331
ENSMUSG00000030301	Ccdc91	0.30864	5.10064	19.6282	6.15e-05	0.000870918
ENSMUSG00000036181	Hist1h1c	1.04611	6.09902	19.7532	6.16e-05	0.000871885
ENSMUSG00000021483	Cdk20	0.574652	3.07019	19.6183	6.17e-05	0.000872655
ENSMUSG00000030983	Bccip	0.326189	5.99847	19.6145	6.18e-05	0.000873141
ENSMUSG00000047539	Fbxo28	0.330324	4.17189	19.5796	6.26e-05	0.000882146
ENSMUSG00000034158	Lrrc58	0.668584	6.3134	19.5733	6.27e-05	0.000883483
ENSMUSG00000018796	Acsl1	0.768062	10.7332	19.5642	6.29e-05	0.0008857
ENSMUSG00000005417	Mprip	0.380419	7.8583	19.5482	6.33e-05	0.000889679
ENSMUSG00000040548	Tex2	0.309164	7.00962	19.5474	6.33e-05	0.000889679
ENSMUSG00000009207	Lnp	0.666324	1.515	19.5437	6.34e-05	0.000890172
ENSMUSG00000011254	Thg1l	0.688658	2.15875	19.5182	6.4e-05	0.000897746
ENSMUSG00000024560	Cxxc1	-0.434727	5.70508	19.5112	6.42e-05	0.000899326
ENSMUSG00000015970	Chdh	-1.31235	7.28694	19.6543	6.46e-05	0.000905175
ENSMUSG00000024914	Drap1	-0.53077	6.71943	19.4693	6.51e-05	0.000910933
ENSMUSG00000032860	P2ry2	0.673285	4.22446	19.4714	6.51e-05	0.000910933
ENSMUSG00000026344	Lypd1	-2.26477	0.0477478	19.4584	6.54e-05	0.000913803
ENSMUSG00000039199	Zdhhc1	-0.651689	4.31011	19.4432	6.58e-05	0.000918148
ENSMUSG00000025037	Maoa	0.503203	4.46621	19.4287	6.61e-05	0.000922291
ENSMUSG00000002064	Sdf2	0.305103	5.32825	19.4069	6.66e-05	0.0009269
ENSMUSG00000007039	Ddah2	-0.676292	3.77617	19.4063	6.67e-05	0.0009269
ENSMUSG00000012187	Mogat1	-1.26046	3.76268	19.5341	6.66e-05	0.0009269
ENSMUSG00000023873	1700010I14Rik	1.6215	-0.00881041	19.3837	6.72e-05	0.000931652
ENSMUSG00000028444	Cntfr	-1.55924	2.54529	19.4392	6.72e-05	0.000931652
ENSMUSG00000032513	Gorasp1	0.550654	5.42301	19.384	6.72e-05	0.000931652
ENSMUSG00000039515	Ppp2r4	0.527646	7.30117	19.3886	6.71e-05	0.000931652
ENSMUSG00000022965	Ifngr2	0.406162	4.83701	19.3787	6.73e-05	0.000931877
ENSMUSG00000038335	Tsr1	0.523529	4.2606	19.3806	6.73e-05	0.000931877
ENSMUSG00000004446	Bid	-0.454247	4.37985	19.3697	6.75e-05	0.000934211
ENSMUSG00000004849	Ap1s1	0.559413	5.68902	19.3572	6.79e-05	0.000937741
ENSMUSG00000015575	Atp6v0e	0.37314	5.85471	19.3484	6.81e-05	0.000940034
ENSMUSG00000028184	Lphn2	0.472341	4.88044	19.3412	6.82e-05	0.000941751
ENSMUSG00000034109	Golim4	0.533469	5.8803	19.3334	6.84e-05	0.000942245
ENSMUSG00000039512	Uhrf1bp1	0.501773	4.77937	19.3346	6.84e-05	0.000942245
ENSMUSG00000042429	Adora1	0.853855	6.35343	19.389	6.83e-05	0.000942245
ENSMUSG00000026374	Tsn	0.287641	5.45199	19.3277	6.86e-05	0.000942764
ENSMUSG00000097042	Gm17491	-0.86366	3.15404	19.3297	6.85e-05	0.000942764
ENSMUSG00000015697	Setdb1	-0.349549	4.85168	19.3203	6.88e-05	0.000943842
ENSMUSG00000020321	Mdh1	0.458428	9.34589	19.3215	6.87e-05	0.000943842
ENSMUSG00000032316	Clk3	-0.304883	5.89301	19.2927	6.95e-05	0.000952609
ENSMUSG00000028955	Vamp3	0.374306	5.55734	19.2868	6.96e-05	0.000953194
ENSMUSG00000041236	Vps41	0.314396	6.1138	19.2869	6.96e-05	0.000953194
ENSMUSG00000012405	Rpl15	0.348391	6.86755	19.2595	7.03e-05	0.000960502
ENSMUSG00000024099	Ndufv2	0.349113	6.72825	19.2598	7.03e-05	0.000960502
ENSMUSG00000017756	Slc12a7	-0.498099	6.99019	19.2437	7.07e-05	0.000965306
ENSMUSG00000011382	Dhdh	0.449381	7.51954	19.2247	7.12e-05	0.000971267
ENSMUSG00000037010	Apln	1.08287	3.23171	19.2279	7.14e-05	0.000972603
ENSMUSG00000028029	Aimp1	0.355036	4.86324	19.2011	7.18e-05	0.000978148
ENSMUSG00000036995	Asap3	-0.746817	3.95424	19.1809	7.23e-05	0.000984634
ENSMUSG00000038046	Rnmtl1	0.543286	3.20452	19.1771	7.24e-05	0.000985243
ENSMUSG00000006494	Pdk1	0.663393	6.27946	19.1669	7.27e-05	0.000988164
ENSMUSG00000056899	Immp2l	0.585574	4.38257	19.1648	7.28e-05	0.000988164
ENSMUSG00000034667	Xpot	0.299346	5.9589	19.1567	7.3e-05	0.00099036
ENSMUSG00000022257	Laptm4b	0.432356	5.81869	19.1504	7.32e-05	0.000991874
ENSMUSG00000090306	Adh6-ps1	1.70141	4.10004	19.1985	7.42e-05	0.00100574
ENSMUSG00000067586	S1pr3	-0.830158	3.4335	19.1014	7.45e-05	0.00100822
ENSMUSG00000030224	Strap	0.295472	6.23297	19.0908	7.48e-05	0.00101139
ENSMUSG00000000441	Raf1	0.517673	6.74957	19.0751	7.52e-05	0.00101642
ENSMUSG00000047777	Phf13	-0.582352	3.76827	19.0713	7.53e-05	0.00101706
ENSMUSG00000061032	Rrp1	0.335774	6.85126	19.064	7.55e-05	0.00101901
ENSMUSG00000070392	Gm20634	1.56816	-0.637267	19.058	7.57e-05	0.00102047
ENSMUSG00000009112	Bcl2l13	0.435378	6.13434	19.041	7.61e-05	0.00102606
ENSMUSG00000038459	Abhd17c	0.426223	5.30108	19.0256	7.66e-05	0.00103108
ENSMUSG00000028772	Zcchc17	0.46384	4.61218	19.0006	7.73e-05	0.00103973
ENSMUSG00000025528	2010106E10Rik	-4.22727	-1.85498	20.1598	7.77e-05	0.00104479
ENSMUSG00000031963	Bmper	-1.61869	3.30758	19.1327	7.78e-05	0.00104479
ENSMUSG00000055239	Kcmf1	0.390425	5.92899	18.9733	7.8e-05	0.0010478
ENSMUSG00000009614	Sardh	0.619033	9.78671	18.9661	7.82e-05	0.00104977
ENSMUSG00000018372	Cep95	-0.452986	3.31272	18.9527	7.86e-05	0.00105416
ENSMUSG00000028741	Mrto4	0.445881	4.5593	18.944	7.89e-05	0.00105671
ENSMUSG00000075023	Accsl	-1.94795	-0.334551	19.4348	7.91e-05	0.00105894
ENSMUSG00000031352	Hccs	0.540077	3.32333	18.9329	7.92e-05	0.00105945
ENSMUSG00000055972	2810407A14Rik	-1.77184	-0.00321017	18.9199	7.96e-05	0.0010637
ENSMUSG00000041775	Mapk1ip1	-0.499883	4.42419	18.9101	7.99e-05	0.00106672
ENSMUSG00000064267	Hvcn1	1.02344	3.84694	18.966	8e-05	0.00106758
ENSMUSG00000020708	Psmc5	0.461607	6.60947	18.9002	8.02e-05	0.00106835
ENSMUSG00000026283	Ing5	-0.438426	3.5382	18.8998	8.02e-05	0.00106835
ENSMUSG00000031154	Otud5	-0.281482	5.92806	18.8953	8.03e-05	0.0010693
ENSMUSG00000056124	B4galt6	0.911759	2.45093	18.8896	8.05e-05	0.00107076
ENSMUSG00000021368	Tbc1d7	0.46413	3.4273	18.8294	8.23e-05	0.00109383
ENSMUSG00000022474	Pmm1	0.801301	5.08082	18.8477	8.26e-05	0.0010972
ENSMUSG00000021967	Mrp63	0.625736	4.55397	18.8166	8.27e-05	0.00109735
ENSMUSG00000030061	Uba3	0.504574	5.0167	18.8089	8.29e-05	0.00109962
ENSMUSG00000019864	Rtn4ip1	0.530496	4.56994	18.785	8.36e-05	0.00110767
ENSMUSG00000067599	Klra7	-3.1004	-2.76176	19.2765	8.36e-05	0.00110767
ENSMUSG00000061904	Slc25a3	0.385659	8.42163	18.7797	8.38e-05	0.00110902
ENSMUSG00000030095	Tmem43	-0.583994	7.30932	18.7734	8.4e-05	0.00111004
ENSMUSG00000033965	Slc16a2	-0.989677	7.0879	18.8449	8.4e-05	0.00111004
ENSMUSG00000028426	Rad23b	0.37538	7.2271	18.7653	8.42e-05	0.00111242
ENSMUSG00000033088	Triobp	-0.499054	5.61666	18.7592	8.44e-05	0.00111406
ENSMUSG00000045996	Polr2k	0.503357	3.07596	18.7465	8.48e-05	0.00111816
ENSMUSG00000060961	Slc4a4	-1.17026	5.12853	18.8869	8.48e-05	0.00111816
ENSMUSG00000076435	Acsf2	0.525528	7.98682	18.7382	8.51e-05	0.00112025
ENSMUSG00000028248	Sfrs18	-0.624909	6.05852	18.7319	8.53e-05	0.00112199
ENSMUSG00000005882	Uqcc1	0.363692	5.59095	18.7205	8.56e-05	0.00112587
ENSMUSG00000022503	Nubp1	0.524187	4.57147	18.7078	8.6e-05	0.00112863
ENSMUSG00000028601	Echdc2	-0.857023	7.56224	18.7168	8.6e-05	0.00112863
ENSMUSG00000031129	Slc9a9	-0.915141	2.15944	18.7113	8.59e-05	0.00112863
ENSMUSG00000071335	G630090E17Rik	0.655439	2.63254	18.7034	8.62e-05	0.00112965
ENSMUSG00000037710	Cisd1	0.529735	7.05029	18.6894	8.66e-05	0.00113466
ENSMUSG00000020180	Snrpd3	0.422761	5.27076	18.6776	8.7e-05	0.00113792
ENSMUSG00000027296	Itpka	-1.18337	1.62096	18.6784	8.7e-05	0.00113792
ENSMUSG00000028751	Pla2g2e	1.56021	2.37519	20.8168	8.74e-05	0.00114246
ENSMUSG00000052151	Ppap2c	-0.716427	4.60693	18.6601	8.75e-05	0.0011436
ENSMUSG00000066456	Hmgn3	-0.649602	3.40125	18.6503	8.79e-05	0.00114688
ENSMUSG00000046415	B430212C06Rik	1.36864	1.6129	19.1234	8.82e-05	0.00115076
ENSMUSG00000030693	Klk10	-2.43421	-1.20836	22.099	8.84e-05	0.00115213
ENSMUSG00000021595	Nsun2	0.310043	6.27895	18.6278	8.86e-05	0.0011539
ENSMUSG00000038861	Pi4kb	-0.30591	5.65251	18.625	8.87e-05	0.00115423
ENSMUSG00000035372	1810055G02Rik	0.806691	6.07517	18.6501	8.9e-05	0.00115752
ENSMUSG00000032398	Snapc5	0.397222	4.30318	18.6132	8.91e-05	0.00115758
ENSMUSG00000024949	Sf1	-0.320371	7.23387	18.6086	8.92e-05	0.00115856
ENSMUSG00000035443	Thyn1	0.545502	3.80142	18.6069	8.93e-05	0.00115856
ENSMUSG00000052698	Tln2	0.655407	6.06319	18.5677	9.06e-05	0.00117459
ENSMUSG00000057982	Zfp809	-0.719815	4.20715	18.5592	9.09e-05	0.00117741
ENSMUSG00000021710	Nln	0.420969	5.39578	18.5523	9.11e-05	0.00117954
ENSMUSG00000042672	Dcst1	-0.8611	3.02028	18.5455	9.13e-05	0.00118165
ENSMUSG00000027257	Pacsin3	-0.600438	6.0532	18.5189	9.22e-05	0.00119245
ENSMUSG00000048240	Gng7	-0.747946	2.78748	18.4907	9.32e-05	0.00120405
ENSMUSG00000028133	Rwdd3	-1.57152	2.44413	18.522	9.37e-05	0.00120963
ENSMUSG00000028709	Mob3c	-0.372123	4.18963	18.4629	9.41e-05	0.00121382
ENSMUSG00000042719	Naa25	0.372594	4.16184	18.4634	9.41e-05	0.00121382
ENSMUSG00000030611	Mrps11	0.435049	4.09595	18.4526	9.45e-05	0.00121755
ENSMUSG00000006392	Med8	0.345325	5.15937	18.4384	9.5e-05	0.00122307
ENSMUSG00000018169	Mfng	0.903987	6.53352	18.4996	9.53e-05	0.00122576
ENSMUSG00000000827	Tpd52l2	0.284072	5.59714	18.4205	9.56e-05	0.0012294
ENSMUSG00000035049	Rrp12	0.853157	3.60506	18.4142	9.58e-05	0.00123141
ENSMUSG00000031534	Smim19	-0.43065	4.62304	18.405	9.62e-05	0.0012345
ENSMUSG00000018858	Ict1	0.482632	4.91631	18.379	9.71e-05	0.00124482
ENSMUSG00000024736	Tmem132a	1.09068	3.33194	18.4002	9.74e-05	0.00124755
ENSMUSG00000047547	Cltb	0.53251	6.44252	18.3692	9.75e-05	0.00124755
ENSMUSG00000031093	Dock11	-0.938745	3.58887	18.36	9.8e-05	0.00125381
ENSMUSG00000037058	Paip2	0.306606	6.41841	18.347	9.83e-05	0.00125606
ENSMUSG00000046756	Mrps7	0.546922	6.25496	18.3406	9.85e-05	0.00125812
ENSMUSG00000001924	Uba1	0.350792	7.91488	18.3296	9.89e-05	0.00125985
ENSMUSG00000022634	Yaf2	0.360862	4.27243	18.3346	9.87e-05	0.00125985
ENSMUSG00000024048	Myl12a	0.41374	7.30779	18.3304	9.89e-05	0.00125985
ENSMUSG00000046070	Igfals	1.2097	6.88013	18.4738	9.89e-05	0.00125985
ENSMUSG00000063558	Aox1	-0.598213	6.89455	18.3101	9.96e-05	0.00126789
ENSMUSG00000024892	Pcx	0.73527	10.27	18.3012	9.99e-05	0.00127118
ENSMUSG00000026385	Dbi	0.664948	10.2638	18.2825	0.000100631	0.00127909
ENSMUSG00000025499	Hras	0.577114	5.46785	18.2799	0.000100728	0.00127942
ENSMUSG00000024759	Atl3	0.491124	6.4947	18.2679	0.000101178	0.00128331
ENSMUSG00000027881	Prpf38b	-0.37916	5.99097	18.2626	0.000101376	0.00128491
ENSMUSG00000020747	2310067B10Rik	-0.39709	5.88043	18.2364	0.000102363	0.00129623
ENSMUSG00000057054	Inca1	-0.637919	4.57412	18.2351	0.000102414	0.00129623
ENSMUSG00000040310	Alx4	1.86628	0.870304	18.6932	0.000102664	0.00129847
ENSMUSG00000039231	Suv39h1	-0.403876	3.53407	18.225	0.0001028	0.00129868
ENSMUSG00000048406	B330016D10Rik	-0.827867	1.34989	18.2243	0.000102826	0.00129868
ENSMUSG00000029455	Aldh2	-0.511623	11.084	18.2222	0.000102904	0.00129876
ENSMUSG00000029534	St7	0.50018	3.2227	18.1999	0.000103759	0.00130862
ENSMUSG00000034645	Zyg11a	-1.37878	0.740973	18.191	0.000104103	0.00131203
ENSMUSG00000050608	Minos1	0.47059	5.7777	18.1876	0.000104235	0.00131277
ENSMUSG00000024581	Napg	0.309307	4.37511	18.1836	0.000104389	0.00131379
ENSMUSG00000028980	H6pd	-0.496409	9.20136	18.1661	0.000105068	0.00132047
ENSMUSG00000040234	Tm7sf3	-0.403355	5.88548	18.1534	0.000105564	0.00132578
ENSMUSG00000023079	Gtf2ird1	0.560151	4.36248	18.1439	0.000105938	0.00132954
ENSMUSG00000028837	Psmb2	0.34793	6.23497	18.125	0.000106683	0.00133795
ENSMUSG00000021277	Traf3	0.575218	3.82099	18.1051	0.000107477	0.00134697
ENSMUSG00000027936	Crtc2	-0.305108	6.03413	18.0959	0.000107845	0.00135063
ENSMUSG00000003235	Eif2b5	0.319886	5.71567	18.0893	0.00010811	0.00135248
ENSMUSG00000023832	Acat2	1.12127	6.2479	18.223	0.000108314	0.00135248
ENSMUSG00000032397	Tipin	0.435394	2.7439	18.0872	0.000108193	0.00135248
ENSMUSG00000056185	Snx32	-0.468425	3.49131	18.0809	0.000108446	0.00135248
ENSMUSG00000064294	Aox3	-1.35148	8.32715	18.1825	0.000108424	0.00135248
ENSMUSG00000072770	Acrbp	-0.756437	2.22453	18.0812	0.000108436	0.00135248
ENSMUSG00000026930	Gpsm1	-0.724577	2.85858	18.0783	0.000108553	0.00135286
ENSMUSG00000073758	Sh3d21	-0.756232	3.0365	18.0498	0.000109707	0.0013663
ENSMUSG00000026245	Farsb	0.549569	5.29411	18.0427	0.000109999	0.00136898
ENSMUSG00000020149	Rab1	0.399374	7.18144	18.0316	0.000110456	0.00137324
ENSMUSG00000039395	Mreg	1.25257	4.53112	18.0547	0.000110495	0.00137324
ENSMUSG00000073985	Gm10602	-0.823746	0.671304	18.0141	0.000111175	0.00138074
ENSMUSG00000027559	Car3	-0.789133	13.1762	17.996	0.000111927	0.00138911
ENSMUSG00000038696	Mapkap1	0.296928	5.58105	17.9776	0.000112696	0.00139671
ENSMUSG00000071662	Polr2g	0.53673	4.25322	17.9743	0.000112833	0.00139744
ENSMUSG00000031748	Gnao1	-1.10983	3.01497	17.9648	0.000113484	0.00140357
ENSMUSG00000056201	Cfl1	0.437786	8.07349	17.9605	0.000113416	0.00140357
ENSMUSG00000054517	Trim65	-0.38131	3.55765	17.956	0.000113608	0.00140412
ENSMUSG00000024338	Psmb8	-0.647583	5.13171	17.9435	0.000114135	0.00140966
ENSMUSG00000028691	Prdx1	0.312821	9.38546	17.9285	0.000114779	0.00141663
ENSMUSG00000024937	Ehbp1l1	0.630736	6.1339	17.9257	0.000114896	0.00141711
ENSMUSG00000022378	Fam49b	0.64649	3.82929	17.9189	0.000115189	0.00141974
ENSMUSG00000031216	Stard8	-0.535527	4.37804	17.9087	0.000115629	0.00142418
ENSMUSG00000028926	Cdk14	0.687206	3.67588	17.899	0.000116047	0.00142834
ENSMUSG00000015733	Capza2	0.466796	6.0946	17.8796	0.000116889	0.00143772
ENSMUSG00000035258	Abi3bp	-1.02904	3.70722	17.9084	0.000117828	0.00144827
ENSMUSG00000045438	Cox19	0.563979	5.42117	17.8518	0.000118107	0.00144971
ENSMUSG00000098178	Gm26924	-0.881837	9.46258	17.8519	0.000118105	0.00144971
ENSMUSG00000022636	Alcam	0.872549	5.25306	17.9048	0.000118308	0.0014508
ENSMUSG00000078941	Taf9	0.510878	2.65673	17.8461	0.000118358	0.0014508
ENSMUSG00000040990	Sh3kbp1	0.770438	4.35146	17.8311	0.000119024	0.00145796
ENSMUSG00000093930	Hmgcs1	1.35476	8.56521	17.9312	0.000119395	0.0014615
ENSMUSG00000022174	Dad1	0.443735	6.32993	17.7945	0.000120662	0.001475
ENSMUSG00000032412	Atp1b3	0.394329	6.10803	17.7961	0.00012059	0.001475
ENSMUSG00000022682	Rrn3	0.32456	4.61333	17.7733	0.000121623	0.00148572
ENSMUSG00000018509	Cenpv	-0.622957	4.3467	17.7592	0.000122264	0.00149152
ENSMUSG00000019863	Qrsl1	0.596829	2.69489	17.7428	0.000123021	0.00149769
ENSMUSG00000032265	Fam46a	-0.79385	3.69085	17.746	0.000122871	0.00149769
ENSMUSG00000050663	Trhde	1.43439	2.22148	17.7505	0.000122977	0.00149769
ENSMUSG00000079017	Ifi27l2a	-1.56855	8.08279	17.8987	0.000123273	0.00149974
ENSMUSG00000049532	Sall2	-0.701534	2.57656	17.7344	0.000123406	0.00150034
ENSMUSG00000000355	Mcts1	0.491721	4.31981	17.7294	0.000123639	0.00150214
ENSMUSG00000027680	Fxr1	0.374779	5.72573	17.7092	0.000124574	0.00151089
ENSMUSG00000030869	Ndufab1	0.473153	6.20835	17.7084	0.000124612	0.00151089
ENSMUSG00000020946	Gosr2	0.37624	6.48378	17.6886	0.000125538	0.00152108
ENSMUSG00000060152	Pop5	0.581575	4.88742	17.6805	0.000125921	0.00152469
ENSMUSG00000049299	Trappc1	0.386167	4.94603	17.6683	0.0001265	0.00152954
ENSMUSG00000058407	Txndc9	0.348844	5.08673	17.6666	0.000126578	0.00152954
ENSMUSG00000020150	Gamt	0.982882	7.53048	17.7207	0.000126725	0.00153029
ENSMUSG00000044881	Coa4	0.694127	2.16173	17.6567	0.00012705	0.00153318
ENSMUSG00000007670	Khsrp	-0.314801	6.17132	17.6529	0.000127229	0.00153344
ENSMUSG00000029338	Antxr2	-0.500993	5.2773	17.6526	0.000127244	0.00153344
ENSMUSG00000018841	Rad51d	-0.563021	4.71028	17.6331	0.000128175	0.00154363
ENSMUSG00000024069	Slc30a6	0.323279	3.27943	17.6301	0.000128321	0.00154435
ENSMUSG00000042354	Gnl3	0.553369	4.88606	17.6272	0.000128463	0.00154501
ENSMUSG00000086914	Gm16124	-0.71726	2.27539	17.6128	0.000129155	0.00155229
ENSMUSG00000022983	Scaf4	-0.347577	4.97623	17.6056	0.000129505	0.00155546
ENSMUSG00000085829	Gm4285	-0.772515	1.86867	17.6004	0.000129758	0.00155744
ENSMUSG00000045045	Lrfn4	-1.10783	1.94794	17.5944	0.000130053	0.00155994
ENSMUSG00000026623	Lpgat1	0.526036	7.5872	17.5775	0.00013088	0.00156775
ENSMUSG00000049939	Lrrc4	-1.72691	0.805633	18.013	0.000130827	0.00156775
ENSMUSG00000032565	Nudt16	-0.513191	3.45837	17.5709	0.000131201	0.00157054
ENSMUSG00000026305	Lrrfip1	0.369497	5.06734	17.5687	0.00013131	0.0015708
ENSMUSG00000009670	Tex11	3.05916	-2.20184	18.5802	0.000131555	0.00157268
ENSMUSG00000005683	Cs	0.623421	8.43245	17.5363	0.000132919	0.00158686
ENSMUSG00000043463	Rab9b	-1.98571	-0.692815	19.3715	0.000132898	0.00158686
ENSMUSG00000030726	Pold3	-0.370426	3.63283	17.5281	0.000133328	0.00159069
ENSMUSG00000022324	Matn2	0.870136	5.26349	17.5816	0.000133711	0.00159207
ENSMUSG00000038463	Olfml2b	-0.950128	3.10603	17.5239	0.000133537	0.00159207
ENSMUSG00000052934	Fbxo31	-0.738365	6.36449	17.5327	0.000133685	0.00159207
ENSMUSG00000027002	Nckap1	0.376325	6.76783	17.5077	0.000134351	0.00159863
ENSMUSG00000022843	Clcn2	-0.592178	5.66751	17.5029	0.000134594	0.00160045
ENSMUSG00000068740	Celsr2	-1.38438	2.67038	17.5431	0.000134748	0.00160121
ENSMUSG00000084883	Ccdc85c	0.541275	4.23643	17.4929	0.000135102	0.00160436
ENSMUSG00000014551	Mrps25	0.490298	4.17653	17.4784	0.000135839	0.00161183
ENSMUSG00000025428	Atp5a1	0.347166	10.1792	17.4758	0.000135975	0.00161183
ENSMUSG00000036585	Fgf1	0.967227	6.84241	17.5562	0.000136002	0.00161183
ENSMUSG00000002768	Mea1	0.47195	5.80037	17.45	0.000137299	0.00162505
ENSMUSG00000024800	Rpp30	0.533303	2.16879	17.4313	0.000138267	0.00163543
ENSMUSG00000003154	Foxj2	-0.336945	4.38998	17.4271	0.000138489	0.00163697
ENSMUSG00000020590	Snx13	0.438911	4.3038	17.4154	0.000139099	0.00164295
ENSMUSG00000028433	Ubap2	0.38699	5.89787	17.4138	0.000139181	0.00164295
ENSMUSG00000050335	Lgals3	0.947885	6.2309	17.5064	0.00013927	0.00164295
ENSMUSG00000036112	Metap2	0.356633	6.12793	17.4031	0.000139745	0.00164746
ENSMUSG00000008167	Fbxw9	-0.557325	4.59013	17.3928	0.000140287	0.00165277
ENSMUSG00000021376	Tpmt	0.4965	5.22912	17.391	0.000140384	0.00165282
ENSMUSG00000052395	Rft1	0.334558	4.53444	17.3796	0.000140986	0.00165881
ENSMUSG00000027809	Etfdh	0.379172	7.86546	17.3744	0.000141264	0.001661
ENSMUSG00000007564	Ppp2r1a	0.357903	7.27536	17.3659	0.000141715	0.0016652
ENSMUSG00000010048	Ifrd2	0.460897	5.51084	17.3593	0.000142069	0.00166827
ENSMUSG00000052337	Immt	0.358329	7.40733	17.3514	0.000142489	0.0016721
ENSMUSG00000047875	Gpr157	-0.673478	3.04311	17.3482	0.000142666	0.00167307
ENSMUSG00000014301	Pam16	0.675325	4.05468	17.3446	0.00014286	0.00167425
ENSMUSG00000027201	Myef2	0.486765	2.94708	17.3253	0.000143902	0.00168536
ENSMUSG00000070934	Rraga	0.243481	5.25077	17.318	0.000144298	0.00168889
ENSMUSG00000034891	Sncb	4.61551	-2.11534	20.3183	0.000144626	0.00169162
ENSMUSG00000024053	Emilin2	1.2532	5.30261	17.4627	0.000144906	0.00169379
ENSMUSG00000079505	Gm11131	-0.814859	1.47984	17.2944	0.000145587	0.00170064
ENSMUSG00000006638	Abhd1	0.622194	2.76457	17.2764	0.000146582	0.00170621
ENSMUSG00000029674	Limk1	-0.604475	3.24449	17.2759	0.000146606	0.00170621
ENSMUSG00000033417	Cacul1	0.314831	5.1691	17.28	0.000146379	0.00170621
ENSMUSG00000034295	Fhod3	1.09403	1.70589	17.2773	0.000146531	0.00170621
ENSMUSG00000045917	6330416G13Rik	0.681696	3.85983	17.2754	0.000146636	0.00170621
ENSMUSG00000095789	Nupr1l	-1.12079	0.76938	17.2791	0.000146433	0.00170621
ENSMUSG00000003228	Grk5	0.661463	4.0851	17.2651	0.000147204	0.0017117
ENSMUSG00000025873	Faf2	0.254785	5.74053	17.2615	0.000147407	0.00171294
ENSMUSG00000023030	Slc11a2	0.387018	5.02079	17.2433	0.000148423	0.00172143
ENSMUSG00000031683	Lsm6	0.448172	4.66298	17.2432	0.000148426	0.00172143
ENSMUSG00000075704	Txnrd2	0.406713	5.33619	17.2433	0.000148421	0.00172143
ENSMUSG00000022847	Thpo	-1.12544	4.19864	17.3289	0.000148551	0.00172176
ENSMUSG00000031996	Aplp2	0.440328	9.6372	17.2355	0.000148861	0.00172424
ENSMUSG00000029319	Coq2	0.447983	5.55302	17.1863	0.000151652	0.00175543
ENSMUSG00000031283	Chrdl1	-1.2629	4.99908	17.3351	0.000151957	0.00175782
ENSMUSG00000034041	Lyl1	-0.779911	2.69541	17.1711	0.000152525	0.00176326
ENSMUSG00000014599	Csf1	-0.462802	4.89255	17.1625	0.000153022	0.00176786
ENSMUSG00000053644	Aldh7a1	-0.288246	8.75717	17.1483	0.000153846	0.00177623
ENSMUSG00000026761	Orc4	0.731051	3.66968	17.1328	0.000154751	0.00178552
ENSMUSG00000038957	Edc3	-0.379828	4.35697	17.1142	0.000155849	0.00179703
ENSMUSG00000022887	Masp1	1.27328	5.06175	17.2289	0.00015647	0.00180304
ENSMUSG00000026192	Atic	0.360625	5.32936	17.0821	0.000157752	0.00181664
ENSMUSG00000005973	Rcn1	-0.46931	4.38578	17.0657	0.000158735	0.00182561
ENSMUSG00000022205	Sub1	0.532021	5.71275	17.0664	0.00015869	0.00182561
ENSMUSG00000059518	Znhit1	0.536462	5.28326	17.0621	0.000158953	0.00182694
ENSMUSG00000050762	Prss27	1.17124	0.593097	19.983	0.00015906	0.001827
ENSMUSG00000018868	Pnpla5	3.04712	0.744951	17.1354	0.000159725	0.00183346
ENSMUSG00000029610	Aimp2	0.467954	3.8366	17.0459	0.000159928	0.0018346
ENSMUSG00000062203	Gspt1	0.394353	6.15837	17.0407	0.000160247	0.00183709
ENSMUSG00000024845	Tmem134	-0.554238	7.10401	17.0233	0.000161308	0.00184268
ENSMUSG00000027327	1700037H04Rik	1.14409	6.04737	17.1644	0.000161179	0.00184268
ENSMUSG00000038349	Plcl1	-1.03894	1.24084	17.0225	0.000161353	0.00184268
ENSMUSG00000078584	AU022252	0.401393	5.60123	17.0281	0.00016101	0.00184268
ENSMUSG00000085028	Slc2a4rg-ps	-0.48561	3.53627	17.0231	0.000161319	0.00184268
ENSMUSG00000085881	Gm15912	-1.16157	1.47147	17.0292	0.000160948	0.00184268
ENSMUSG00000036120	Rfxank	0.380691	4.2523	17.0039	0.000162497	0.00185337
ENSMUSG00000042790	Rnf214	0.351562	4.30009	17.0055	0.000162398	0.00185337
ENSMUSG00000036918	Ttc7	0.455634	6.11599	17.002	0.000162616	0.00185356
ENSMUSG00000029617	Ccz1	0.31786	5.16994	16.9959	0.000162989	0.00185663
ENSMUSG00000032796	Lama1	-2.47082	1.27354	17.064	0.000163218	0.00185804
ENSMUSG00000079013	Serpina3j	-2.42604	-0.901701	16.978	0.000164102	0.00186692
ENSMUSG00000061882	Ccdc62	-0.817221	2.02173	16.96	0.000165229	0.00187855
ENSMUSG00000082361	Btc	-1.30335	1.6423	16.9562	0.000165467	0.00188006
ENSMUSG00000001445	Mrpl10	0.354253	5.99486	16.953	0.000165668	0.00188115
ENSMUSG00000001435	Col18a1	0.520763	10.1415	16.9498	0.000165867	0.00188221
ENSMUSG00000086782	E130102H24Rik	-0.965926	2.31053	16.9474	0.00016602	0.00188275
ENSMUSG00000060530	A930017M01Rik	3.12178	-2.06035	16.9431	0.000166291	0.00188463
ENSMUSG00000023723	Mrps23	0.367068	4.9508	16.9411	0.000166419	0.00188489
ENSMUSG00000015804	Med28	-0.423259	5.03432	16.9284	0.000167221	0.00189157
ENSMUSG00000053749	Gm9920	-1.08487	-0.510169	16.93	0.000167118	0.00189157
ENSMUSG00000032834	Pwp2	0.451201	3.85234	16.9252	0.000167422	0.00189265
ENSMUSG00000026073	Il1r2	2.47979	-1.66801	16.9222	0.000167616	0.00189365
ENSMUSG00000029270	Fam69a	0.562279	3.98139	16.9166	0.000167975	0.0018965
ENSMUSG00000031144	Syp	1.0573	3.79697	16.9743	0.000168786	0.00190446
ENSMUSG00000029272	Sult1e1	-2.22555	2.81076	17.0666	0.000168976	0.0019054
ENSMUSG00000027259	Adal	0.470261	3.20409	16.8869	0.000169879	0.00191437
ENSMUSG00000021756	Il6st	-0.327849	7.11081	16.8735	0.00017075	0.00192298
ENSMUSG00000013997	Nit1	0.240574	6.52742	16.8613	0.000171541	0.00193068
ENSMUSG00000029014	Dnajc2	0.304714	4.25863	16.8579	0.000171765	0.00193197
ENSMUSG00000021241	Isca2	0.427681	5.14659	16.8439	0.000172684	0.00194109
ENSMUSG00000028464	Tpm2	-1.03561	4.63627	16.9371	0.000172909	0.0019424
ENSMUSG00000026208	Des	-0.703746	4.45027	16.8293	0.000173643	0.00194942
ENSMUSG00000091510	Mtag2	-2.69011	-2.35544	19.6653	0.000174188	0.00195431
ENSMUSG00000022283	Pabpc1	0.373782	8.43512	16.8097	0.000174942	0.00196155
ENSMUSG00000026430	Rassf5	-0.652072	3.31884	16.7931	0.00017605	0.00197274
ENSMUSG00000037762	Slc16a9	-0.82258	1.8944	16.7907	0.000176211	0.0019733
ENSMUSG00000049241	Gpr81	-0.999735	5.56701	16.889	0.000176455	0.0019739
ENSMUSG00000097974	Gm10605	-0.985358	0.29433	16.7867	0.000176485	0.0019739
ENSMUSG00000049657	Zbtb5	-0.582479	3.90397	16.7784	0.000177043	0.0019789
ENSMUSG00000030428	Ttyh1	-1.56385	0.114476	16.7702	0.000177597	0.00198385
ENSMUSG00000051346	Spryd4	0.371965	4.56077	16.7664	0.000177855	0.0019855
ENSMUSG00000026617	Bpnt1	0.378554	5.9221	16.7547	0.00017865	0.00199312
ENSMUSG00000020196	Cabin1	-0.475502	5.47468	16.7491	0.00017903	0.00199514
ENSMUSG00000031015	Swap70	-0.322507	4.38226	16.7487	0.000179054	0.00199514
ENSMUSG00000020483	Dynll2	0.410312	7.78848	16.7448	0.000179325	0.00199692
ENSMUSG00000036214	Znrd1as	0.265917	3.47442	16.7377	0.00017981	0.00200107
ENSMUSG00000017466	Timp2	-0.786334	7.1599	16.7501	0.000179926	0.00200112
ENSMUSG00000001542	Ell2	0.522538	5.82099	16.7142	0.000181428	0.0020121
ENSMUSG00000037791	Phf12	-0.315416	5.33508	16.7135	0.000181476	0.0020121
ENSMUSG00000055065	Ddx17	-0.340536	7.58152	16.7139	0.000181445	0.0020121
ENSMUSG00000057716	Tmem178b	-1.40109	-0.418629	19.5252	0.00018135	0.0020121
ENSMUSG00000068917	Clk2	-0.337712	4.93023	16.7179	0.000181171	0.0020121
ENSMUSG00000038736	Nudcd1	0.558224	3.35368	16.6976	0.00018258	0.00202309
ENSMUSG00000051596	Otop1	2.65779	-1.19161	19.4993	0.000182706	0.00202322
ENSMUSG00000028149	Rap1gds1	0.328698	5.38019	16.6918	0.000182982	0.00202389
ENSMUSG00000031980	Agt	-0.750386	9.44446	16.6917	0.000182992	0.00202389
ENSMUSG00000038145	Snrk	-0.485749	6.50991	16.6827	0.00018362	0.00202958
ENSMUSG00000020160	Meis1	-0.563046	2.98564	16.6789	0.000183887	0.00203127
ENSMUSG00000096606	Gm4980	-0.664902	2.94193	16.6687	0.000184607	0.00203797
ENSMUSG00000024403	Atp6v1g2	-0.552456	2.0929	16.6581	0.000185352	0.00204493
ENSMUSG00000042379	Esm1	2.36043	1.31582	16.7224	0.000185797	0.00204858
ENSMUSG00000036309	Skp1a	0.359259	7.16151	16.6462	0.000186199	0.00205086
ENSMUSG00000038187	Btbd10	0.571797	3.12247	16.6441	0.000186348	0.00205086
ENSMUSG00000064345	mt-Nd2	0.871203	12.2088	16.6455	0.000186247	0.00205086
ENSMUSG00000024659	Anxa1	0.804053	7.24607	16.655	0.000187018	0.00205571
ENSMUSG00000097613	Gm17597	-1.4192	-0.474295	16.6354	0.000186968	0.00205571
ENSMUSG00000028207	Asph	-0.750429	6.14	16.6617	0.000187241	0.00205689
ENSMUSG00000021140	Pcnx	0.305494	5.57524	16.628	0.000187496	0.00205843
ENSMUSG00000024993	Fam45a	0.541175	3.97458	16.624	0.000187783	0.00205932
ENSMUSG00000037060	Prkcdbp	0.845576	7.22511	16.6589	0.000187808	0.00205932
ENSMUSG00000030861	Acadsb	-0.429464	7.13113	16.6068	0.000189022	0.0020701
ENSMUSG00000061461	Smim20	0.417684	4.65165	16.608	0.000188936	0.0020701
ENSMUSG00000022801	Lrch3	-0.349839	4.5106	16.5928	0.000190034	0.00207991
ENSMUSG00000026688	Mgst3	-0.843924	6.30828	16.6482	0.000190242	0.00208091
ENSMUSG00000031701	Dnaja2	0.345628	6.82513	16.5838	0.00019069	0.00208453
ENSMUSG00000029373	Pf4	-1.03235	3.05864	16.5831	0.000190888	0.00208543
ENSMUSG00000057497	Fam136a	0.339228	5.23032	16.5788	0.000191059	0.00208602
ENSMUSG00000029055	Plch2	2.09891	-0.50042	16.5637	0.000192161	0.00209677
ENSMUSG00000008859	Rala	0.381966	4.86408	16.5505	0.000193131	0.00210607
ENSMUSG00000061315	Naca	0.301278	7.66016	16.5403	0.000193893	0.0021118
ENSMUSG00000096971	4930556M19Rik	-0.779871	1.80548	16.5404	0.00019388	0.0021118
ENSMUSG00000090877	Hspa1b	-0.895018	2.44353	16.5198	0.000195418	0.00212712
ENSMUSG00000029416	Slc15a4	-0.546977	4.41885	16.5111	0.000196066	0.0021303
ENSMUSG00000031904	Slc7a6	0.636587	3.69284	16.5112	0.000196062	0.0021303
ENSMUSG00000054302	Eapp	0.287387	4.71771	16.5111	0.000196068	0.0021303
ENSMUSG00000039218	Srrm2	-0.533964	8.25492	16.4993	0.00019696	0.0021387
ENSMUSG00000029775	Klhdc10	0.313808	5.87038	16.4808	0.000198358	0.00215257
ENSMUSG00000030474	Siglece	-1.06372	0.913424	16.4788	0.000198509	0.0021529
ENSMUSG00000017715	Pgs1	0.472506	4.73408	16.4752	0.000198787	0.00215437
ENSMUSG00000095362	Gm14325	0.922589	2.21666	16.4739	0.000198886	0.00215437
ENSMUSG00000021033	Gstz1	0.414098	9.83829	16.4716	0.000199062	0.00215498
ENSMUSG00000025894	Aasdhppt	0.459882	4.32778	16.466	0.000199485	0.00215757
ENSMUSG00000074698	Csnk2a1	0.367423	5.99418	16.4653	0.000199543	0.00215757
ENSMUSG00000005354	Txn2	0.47526	7.63068	16.4629	0.000199725	0.00215823
ENSMUSG00000040351	Ankib1	0.40441	4.02331	16.4533	0.000200464	0.00216491
ENSMUSG00000044461	Shisa2	-1.45607	1.68482	16.4364	0.000201762	0.00217761
ENSMUSG00000021171	Esyt2	0.521383	5.19929	16.4241	0.000202718	0.00218637
ENSMUSG00000025184	R3hcc1l	-0.393189	4.30596	16.4228	0.000202818	0.00218637
ENSMUSG00000005442	Cic	-0.338668	6.2796	16.4162	0.000203335	0.00218931
ENSMUSG00000074656	Eif2s2	0.524196	6.00943	16.4165	0.000203311	0.00218931
ENSMUSG00000030327	Necap1	0.301643	5.16754	16.409	0.000203897	0.00219272
ENSMUSG00000083563	Gm13340	0.741743	2.72896	16.4095	0.000203856	0.00219272
ENSMUSG00000021248	Tmed10	0.281833	7.15131	16.4068	0.000204064	0.0021932
ENSMUSG00000024844	Banf1	0.573969	5.37457	16.3966	0.000204869	0.00220052
ENSMUSG00000045733	Sprn	-1.61399	0.0884933	16.3843	0.000205838	0.00220961
ENSMUSG00000032042	Srpr	0.338554	7.55476	16.3818	0.000206033	0.00221037
ENSMUSG00000038775	Vill	-0.724551	2.0317	16.371	0.00020689	0.00221824
ENSMUSG00000025228	Actr1a	0.367193	6.92548	16.3615	0.00020765	0.00222505
ENSMUSG00000020952	Scfd1	0.470287	5.07851	16.3501	0.000208557	0.00223344
ENSMUSG00000041891	Lman1	0.316855	7.24704	16.3279	0.000210341	0.00224985
ENSMUSG00000055980	Irs1	-0.557523	4.57861	16.3281	0.000210326	0.00224985
ENSMUSG00000090145	Ugt1a6b	0.639995	4.97861	16.3249	0.000210585	0.00225111
ENSMUSG00000033991	Ttc37	0.338023	3.67375	16.3126	0.000211587	0.00226047
ENSMUSG00000024218	Taf11	0.344056	4.17455	16.3107	0.000211737	0.00226072
ENSMUSG00000019087	Atp6ap1	0.27129	6.98498	16.3049	0.000212208	0.0022644
ENSMUSG00000055720	Ubl7	0.323203	5.67001	16.2973	0.000212835	0.00226974
ENSMUSG00000032883	Acsl3	1.13778	4.77073	16.407	0.000213089	0.00227108
ENSMUSG00000021559	Dapk1	0.481839	6.25543	16.2762	0.00021457	0.00228415
ENSMUSG00000073147	5031425E22Rik	-0.476309	3.89028	16.2766	0.000214531	0.00228415
ENSMUSG00000026927	Sdccag3	0.253187	5.84062	16.2668	0.000215346	0.00229105
ENSMUSG00000023004	Tuba1b	0.660701	7.26866	16.2455	0.000217119	0.00230579
ENSMUSG00000031568	Rwdd4a	0.369472	4.2432	16.2463	0.000217047	0.00230579
ENSMUSG00000033006	Sox10	-2.7078	-1.76786	16.617	0.000217423	0.00230765
ENSMUSG00000074280	Gm6166	2.86432	-1.08846	16.2325	0.000218209	0.00231462
ENSMUSG00000051331	Cacna1c	-1.03119	1.91445	16.2277	0.000218613	0.00231753
ENSMUSG00000018848	Rars	0.353928	5.37414	16.219	0.000219342	0.00232389
ENSMUSG00000035686	Thrsp	1.23886	10.0741	16.2328	0.00022102	0.00234027
ENSMUSG00000015947	Fcgr1	-1.1086	1.22321	16.1923	0.000221614	0.00234489
ENSMUSG00000082536	Gm13456	0.786613	2.57022	16.191	0.000221719	0.00234489
ENSMUSG00000004530	Coro1c	0.39525	5.89892	16.1709	0.000223446	0.00236177
ENSMUSG00000009549	Srp14	0.367419	5.48473	16.1499	0.00022526	0.00237953
ENSMUSG00000033845	Mrpl15	0.381929	5.67484	16.1427	0.000225888	0.00238476
ENSMUSG00000028223	Decr1	0.384085	7.91385	16.1402	0.000226103	0.00238562
ENSMUSG00000037606	Osbpl5	0.663714	4.65163	16.1271	0.000227252	0.00239633
ENSMUSG00000039128	Cdc123	0.272611	5.55635	16.125	0.000227436	0.00239686
ENSMUSG00000026674	Ddr2	-0.66943	4.62896	16.1192	0.000227943	0.00240079
ENSMUSG00000057729	Prtn3	-2.52401	2.36861	16.2665	0.000228241	0.00240251
ENSMUSG00000005610	Eif4g2	0.406212	8.69053	16.1133	0.000228468	0.00240348
ENSMUSG00000025223	Ldb1	-0.457818	6.6464	16.092	0.000230353	0.00241904
ENSMUSG00000025545	Clybl	0.342412	6.06971	16.0922	0.000230334	0.00241904
ENSMUSG00000020017	Hal	1.64714	7.89745	16.2133	0.000230763	0.00242193
ENSMUSG00000043467	Zbtb37	-0.380278	3.08254	16.08	0.00023142	0.0024274
ENSMUSG00000036639	Nudt1	0.559627	3.93037	16.0767	0.000231716	0.00242841
ENSMUSG00000064370	mt-Cytb	0.646376	13.4678	16.0759	0.000231788	0.00242841
ENSMUSG00000059751	Rps3a3	1.9293	-1.19081	16.0615	0.000233084	0.00244056
ENSMUSG00000035960	Apex1	0.535861	5.18074	16.0485	0.000234251	0.00245134
ENSMUSG00000028214	Gem	-0.96927	1.14063	16.0436	0.000234697	0.00245313
ENSMUSG00000055148	Klf2	-1.0416	4.95104	16.1484	0.000234587	0.00245313
ENSMUSG00000059119	Nap1l4	0.257593	6.36771	16.0346	0.000235513	0.00246023
ENSMUSG00000007656	Arpp19	0.375723	5.6635	16.0286	0.000236063	0.00246453
ENSMUSG00000020022	Ndufa12	0.397737	5.55432	16.0233	0.000236548	0.00246727
ENSMUSG00000038884	A230050P20Rik	-0.570684	6.56573	16.0227	0.000236601	0.00246727
ENSMUSG00000001018	Snapin	0.336784	5.06689	16.0078	0.000237964	0.00248004
ENSMUSG00000033386	Frrs1	0.43389	4.54636	16.006	0.000238137	0.0024804
ENSMUSG00000042289	Hsd3b7	-0.713518	3.32924	16.003	0.000238413	0.00248182
ENSMUSG00000054509	Parp4	-0.479083	4.32131	15.997	0.000238965	0.00248612
ENSMUSG00000035967	Ddx26b	-0.956204	3.00777	15.9912	0.000239496	0.00248875
ENSMUSG00000059743	Fdps	1.33097	3.24906	16.0284	0.000239451	0.00248875
ENSMUSG00000037461	Ints7	0.386797	4.60798	15.9896	0.000239649	0.00248889
ENSMUSG00000051232	Tmem199	0.412143	3.58128	15.9768	0.00024084	0.00249837
ENSMUSG00000029649	Pomp	0.440509	6.59436	15.9637	0.000242063	0.00250959
ENSMUSG00000072772	Grcc10	-0.547546	2.11502	15.9603	0.000242379	0.00251142
ENSMUSG00000026604	Ptpn14	-0.403906	4.59667	15.9526	0.000243103	0.00251746
ENSMUSG00000068036	Mllt4	0.426569	6.10139	15.9258	0.000245641	0.00254227
ENSMUSG00000040618	Pck2	-0.573164	4.34883	15.9156	0.000246611	0.00255083
ENSMUSG00000021806	Nid2	0.848767	6.15134	15.9782	0.000246802	0.00255133
ENSMUSG00000036578	Fxyd7	-1.48872	-0.664251	15.912	0.000246953	0.00255142
ENSMUSG00000026415	Fcamr	-2.76382	-1.67059	15.9102	0.000247129	0.00255176
ENSMUSG00000031513	Leprotl1	0.301683	4.53355	15.9013	0.000247986	0.00255914
ENSMUSG00000028121	Bcar3	0.725841	6.74416	15.909	0.000248172	0.00255957
ENSMUSG00000040111	Gramd1b	0.672721	4.60226	15.8968	0.000248415	0.0025606
ENSMUSG00000058246	Gm10037	-0.839809	0.80351	15.8934	0.000248746	0.00256255
ENSMUSG00000087370	Tmem170b	-0.430194	3.87605	15.8903	0.000249039	0.00256408
ENSMUSG00000068921	Dap3	0.356721	5.75055	15.888	0.000249261	0.00256489
ENSMUSG00000038323	1700066M21Rik	0.80519	3.53364	15.879	0.000250131	0.00257237
ENSMUSG00000000339	Rtca	0.430053	3.89295	15.8634	0.000251657	0.00258657
ENSMUSG00000038268	Ovca2	0.451767	3.10269	15.8608	0.000251904	0.00258763
ENSMUSG00000066026	Dhrs3	0.486606	7.69777	15.8483	0.000253126	0.00259868
ENSMUSG00000022892	App	0.537856	8.51376	15.8335	0.000254587	0.00261218
ENSMUSG00000050276	Mrgprg	4.91831	-1.1331	16.7543	0.000255268	0.00261767
ENSMUSG00000040928	S100pbp	-0.559791	4.26866	15.8175	0.000256174	0.00262546
ENSMUSG00000034243	Golgb1	-0.386857	6.45998	15.8028	0.000257635	0.00263892
ENSMUSG00000068220	Lgals1	0.822778	9.51458	15.7981	0.000258106	0.00264222
ENSMUSG00000024972	Lgals12	-0.783885	6.98671	15.8187	0.000258616	0.00264593
ENSMUSG00000097123	Gm6297	-0.989697	1.01393	15.7844	0.000259492	0.00265337
ENSMUSG00000034432	Cops8	0.327265	5.49669	15.7795	0.000259984	0.00265537
ENSMUSG00000033434	Gtpbp6	-0.517334	4.20594	15.7778	0.000260152	0.00265557
ENSMUSG00000026692	Fmo4	-0.909118	2.96763	15.7711	0.000260827	0.00266094
ENSMUSG00000031021	Tmem9b	0.259786	4.72193	15.7697	0.000260978	0.00266096
ENSMUSG00000038271	Iffo1	-0.429807	4.62365	15.7522	0.000262757	0.00267757
ENSMUSG00000021255	Esrrb	2.46661	-0.945778	15.7426	0.000263737	0.00268603
ENSMUSG00000032594	Ip6k1	-0.297373	6.18743	15.737	0.000264315	0.00269038
ENSMUSG00000086290	Snhg12	0.474	3.45647	15.7102	0.000267084	0.00271702
ENSMUSG00000027569	Mrgbp	-0.440877	3.67222	15.702	0.000267935	0.00272259
ENSMUSG00000073489	Ifi204	-0.762474	3.04017	15.703	0.00026783	0.00272259
ENSMUSG00000024507	Hsd17b4	0.403774	8.86187	15.689	0.000269294	0.00273329
ENSMUSG00000028653	Trit1	-0.524266	4.33643	15.6898	0.000269209	0.00273329
ENSMUSG00000022105	Rb1	0.524533	4.2068	15.6722	0.000271056	0.00274806
ENSMUSG00000047731	Wbp1l	0.402101	8.23773	15.6698	0.000271313	0.0027491
ENSMUSG00000031740	Mmp2	-0.833083	4.86392	15.7022	0.000272812	0.00276272
ENSMUSG00000026626	Ppp2r5a	0.599459	8.50786	15.6348	0.000275035	0.00278337
ENSMUSG00000042814	Mcts2	0.576068	2.43118	15.6336	0.000275162	0.00278337
ENSMUSG00000030105	Arl8b	0.36341	5.83319	15.6271	0.000275858	0.00278883
ENSMUSG00000029591	Ung	-0.772248	3.04894	15.6247	0.000276118	0.00278989
ENSMUSG00000053110	Yap1	0.297201	6.08557	15.6194	0.000276689	0.00279407
ENSMUSG00000097415	AU020206	-0.621891	3.59532	15.5961	0.000279213	0.00281797
ENSMUSG00000037999	Arap2	0.684397	3.42157	15.5923	0.000279626	0.00282055
ENSMUSG00000029535	Triap1	0.3544	4.317	15.5813	0.000280834	0.00283114
ENSMUSG00000004356	Utp20	0.39739	3.97149	15.5702	0.000282049	0.00284179
ENSMUSG00000031706	Rfx1	-0.443593	4.11868	15.5685	0.00028223	0.002842
ENSMUSG00000079654	Prrt4	1.20186	1.60149	15.5552	0.000283698	0.00285518
ENSMUSG00000031502	Col4a1	0.702889	9.62098	15.5477	0.000284537	0.00286047
ENSMUSG00000058076	Sdhc	0.360222	7.46384	15.5476	0.000284543	0.00286047
ENSMUSG00000008822	Acyp1	0.52693	2.97876	15.5428	0.000285076	0.00286421
ENSMUSG00000021079	Timm9	0.448064	4.74733	15.5321	0.000286272	0.00287167
ENSMUSG00000042305	Tmem183a	0.350213	6.43612	15.5318	0.0002863	0.00287167
ENSMUSG00000052516	Robo2	2.89566	-0.681059	15.5328	0.000286192	0.00287167
ENSMUSG00000031723	Txnl4b	0.402255	4.01377	15.5283	0.000286701	0.00287247
ENSMUSG00000064343	mt-Tq	2.37153	-0.796108	15.5284	0.000286687	0.00287247
ENSMUSG00000025630	Hprt	0.458132	5.9979	15.5068	0.000289116	0.00289489
ENSMUSG00000025737	Wdr24	-0.33697	4.3629	15.5055	0.000289262	0.00289489
ENSMUSG00000020390	Ube2b	0.371662	6.25235	15.4982	0.000290084	0.00290149
ENSMUSG00000028990	Lzic	0.412024	3.29723	15.4862	0.000291454	0.00291193
ENSMUSG00000066175	2510046G10Rik	-0.874819	0.759709	15.4862	0.000291447	0.00291193
ENSMUSG00000021327	Zkscan3	-0.371112	5.43083	15.4746	0.000292776	0.00292351
ENSMUSG00000022453	Naga	-0.472767	5.72433	15.4586	0.000294611	0.00293856
ENSMUSG00000055723	Rras2	0.475113	4.30699	15.4594	0.000294513	0.00293856
ENSMUSG00000041132	N4bp2l1	-0.424177	5.83466	15.4445	0.000296234	0.00294981
ENSMUSG00000044627	Swi5	0.39142	6.92626	15.4456	0.000296107	0.00294981
ENSMUSG00000061950	Ppp4r1	0.308183	4.93995	15.4471	0.000295933	0.00294981
ENSMUSG00000041328	Pcf11	-0.552761	4.68353	15.4396	0.00029681	0.00295061
ENSMUSG00000041548	Hspb8	0.624793	7.47569	15.4417	0.00029656	0.00295061
ENSMUSG00000080893	Gm15920	0.622434	1.93575	15.4403	0.000296723	0.00295061
ENSMUSG00000038206	Fbxo8	0.376184	5.38165	15.4358	0.000297244	0.00295165
ENSMUSG00000086924	Gm11766	2.28028	-1.67589	15.4268	0.000298294	0.00296043
ENSMUSG00000001123	Lgals9	0.382448	8.68583	15.4239	0.000298639	0.00296221
ENSMUSG00000027787	Nmd3	0.406318	4.33504	15.4201	0.000299079	0.00296493
ENSMUSG00000004359	Spic	-1.45626	-0.569467	15.4161	0.000299547	0.00296735
ENSMUSG00000024778	Fas	0.423196	4.32895	15.4152	0.000299655	0.00296735
ENSMUSG00000008035	Mid1ip1	1.11351	6.03514	15.5309	0.00030012	0.00296974
ENSMUSG00000031826	Usp10	0.317468	6.27314	15.4103	0.000300229	0.00296974
ENSMUSG00000031903	Pla2g15	0.466549	5.25875	15.3991	0.000301541	0.00298108
ENSMUSG00000036449	Lcn8	-3.47622	-2.13	15.3967	0.000301827	0.00298225
ENSMUSG00000029304	Spp1	-2.44197	4.43805	15.5688	0.000302535	0.00298759
ENSMUSG00000048482	Bdnf	1.67936	0.457027	15.3857	0.000303138	0.0029919
ENSMUSG00000001552	Jup	-0.430492	7.6754	15.3815	0.000303634	0.00299349
ENSMUSG00000022635	Zcrb1	0.344539	4.99615	15.382	0.000303569	0.00299349
ENSMUSG00000027907	S100a11	0.865643	7.36603	15.4159	0.000304293	0.00299834
ENSMUSG00000006221	Hspb7	1.29274	4.36121	15.4873	0.000306085	0.00301433
ENSMUSG00000020484	Xbp1	-0.491142	7.68994	15.3567	0.000306593	0.00301767
ENSMUSG00000030727	Rabep2	-0.47866	4.327	15.3531	0.000307029	0.0030203
ENSMUSG00000036087	Slain2	0.361616	5.06565	15.3471	0.000307748	0.00302571
ENSMUSG00000054484	Tmem62	0.371045	3.74034	15.3316	0.000309628	0.00304252
ENSMUSG00000027829	Ccnl1	-0.447402	5.21265	15.3248	0.00031045	0.00304893
ENSMUSG00000039683	Sdk1	1.03015	2.05254	15.3224	0.000310737	0.00305007
ENSMUSG00000024346	Pfdn1	0.359768	5.00607	15.3199	0.000311047	0.00305143
ENSMUSG00000063077	Kif1b	0.327044	7.1216	15.3045	0.000312935	0.00306827
ENSMUSG00000027751	Supt20	-0.362826	4.63232	15.2893	0.000314798	0.00308485
ENSMUSG00000048096	Lmod1	-1.51324	2.536	15.3477	0.000314989	0.00308503
ENSMUSG00000027669	Gnb4	-0.776204	3.9426	15.2859	0.000315772	0.00309101
ENSMUSG00000028945	Rheb	0.271368	5.68734	15.2722	0.000316919	0.00309884
ENSMUSG00000070873	Lilra5	-1.34525	0.21423	15.2734	0.00031677	0.00309884
ENSMUSG00000028518	Prkaa2	0.661485	4.97339	15.2623	0.000318161	0.00310928
ENSMUSG00000007721	Ccdc124	0.514208	5.43977	15.2576	0.000318738	0.00311323
ENSMUSG00000020268	Lyrm7	0.896913	1.44621	15.2559	0.000318949	0.00311358
ENSMUSG00000025939	Ube2w	0.590379	4.70592	15.2491	0.000319807	0.00312025
ENSMUSG00000030717	Nupr1	1.00676	5.70269	15.3422	0.000320377	0.00312255
ENSMUSG00000032733	Snx33	-0.38894	4.94122	15.2445	0.000320391	0.00312255
ENSMUSG00000031987	Egln1	0.304455	5.79388	15.2368	0.000321358	0.00313026
ENSMUSG00000018677	Slc25a39	0.528836	8.87606	15.2121	0.000324486	0.0031573
ENSMUSG00000022361	Zhx1	0.525711	5.03812	15.2069	0.000325157	0.00316211
ENSMUSG00000015759	Cnih1	0.316524	5.99491	15.1962	0.000326519	0.00317363
ENSMUSG00000059355	BC056474	0.427024	5.52285	15.1909	0.000327203	0.00317855
ENSMUSG00000041028	Ghitm	0.299014	8.16706	15.1802	0.000328583	0.00319022
ENSMUSG00000028127	Abcd3	0.457803	8.86635	15.1641	0.000330666	0.00320869
ENSMUSG00000064363	mt-Nd4	0.436535	11.9424	15.1585	0.000331399	0.00321407
ENSMUSG00000092564	BC051226	-0.688049	2.61288	15.1519	0.00033226	0.00322067
ENSMUSG00000022337	Emc2	0.456105	5.62073	15.1286	0.000335315	0.00324807
ENSMUSG00000022964	Tmem50b	0.461775	4.75406	15.1262	0.000335641	0.00324807
ENSMUSG00000037458	Azin1	0.575449	5.89573	15.1266	0.000335586	0.00324807
ENSMUSG00000091345	Col6a5	-2.03385	4.83387	15.2973	0.000335813	0.00324807
ENSMUSG00000035051	Dhx57	-0.302355	3.73786	15.122	0.000336188	0.00324818
ENSMUSG00000051169	Rpusd3	0.559997	4.29965	15.1233	0.000336019	0.00324818
ENSMUSG00000087611	4930458D05Rik	-1.00336	1.74916	15.1091	0.000337901	0.00326297
ENSMUSG00000038665	Dgki	1.70389	-1.55933	15.863	0.000339492	0.00327656
ENSMUSG00000030094	Xpc	-0.321264	5.01452	15.0951	0.000339771	0.00327747
ENSMUSG00000054321	Taf4b	0.658637	1.53728	15.093	0.000340055	0.00327747
ENSMUSG00000078652	Psme3	0.253379	6.29476	15.0924	0.000340135	0.00327747
ENSMUSG00000027643	Ghrh	2.95468	-2.47579	17.3984	0.000340374	0.003278
ENSMUSG00000020849	Ywhae	0.273608	7.9166	15.0745	0.000342532	0.00329523
ENSMUSG00000051413	Plagl2	-0.516645	2.721	15.0755	0.000342404	0.00329523
ENSMUSG00000015747	Vps45	0.393164	3.47857	15.0644	0.000343905	0.00330667
ENSMUSG00000004558	Ndrg2	-0.537735	10.1894	15.0599	0.000344517	0.00331077
ENSMUSG00000026895	Ndufa8	0.532507	6.809	15.0573	0.000344869	0.00331205
ENSMUSG00000029402	Snrnp35	0.537002	2.77285	15.0562	0.000345021	0.00331205
ENSMUSG00000024563	Smad2	0.337561	4.50463	15.0534	0.000345398	0.0033139
ENSMUSG00000042208	0610010F05Rik	0.469897	3.93318	15.0474	0.000346215	0.00331995
ENSMUSG00000022629	Kif21a	0.496332	4.78248	15.0418	0.000346975	0.00332062
ENSMUSG00000034903	Cobll1	-0.51242	5.60365	15.0453	0.000346504	0.00332062
ENSMUSG00000041161	Otud3	0.703136	2.61435	15.0414	0.000347028	0.00332062
ENSMUSG00000060992	Copz1	0.385025	7.29765	15.0418	0.000346986	0.00332062
ENSMUSG00000058638	Zfp110	-0.430154	4.99107	15.0285	0.000348805	0.00333585
ENSMUSG00000044709	Gemin7	0.543098	4.7719	15.0147	0.000350704	0.00335221
ENSMUSG00000001143	Lman2l	-0.290346	4.95839	15.0073	0.000351726	0.00336019
ENSMUSG00000025133	Ints4	0.261678	4.95762	15.0052	0.000352022	0.00336122
ENSMUSG00000018931	Gm16515	0.484416	4.96918	14.9995	0.00035281	0.00336694
ENSMUSG00000031858	Mau2	-0.353156	5.15321	14.9975	0.0003531	0.00336791
ENSMUSG00000031239	Itm2a	-1.4607	1.40966	14.9955	0.000353368	0.00336867
ENSMUSG00000026500	Cox20	0.503551	4.01149	14.9807	0.000355442	0.00338484
ENSMUSG00000087429	Gm16235	1.43716	-0.048658	15.727	0.000356529	0.00339338
ENSMUSG00000061540	Orm2	2.93293	3.51506	15.1408	0.000356723	0.00339342
ENSMUSG00000034810	Scn7a	-0.738074	5.1608	14.9968	0.000357001	0.00339426
ENSMUSG00000055862	Izumo4	-0.505095	4.44462	14.968	0.000357229	0.00339462
ENSMUSG00000044350	Lacc1	0.918642	3.30716	14.9637	0.000358231	0.00340234
ENSMUSG00000067818	Myl9	-1.22958	5.26228	15.0817	0.000359169	0.00340943
ENSMUSG00000078713	Tomm5	0.511289	4.3324	14.9481	0.000360048	0.00341597
ENSMUSG00000086216	Gm13610	1.93792	-0.844605	14.9447	0.000360535	0.00341697
ENSMUSG00000025736	Jmjd8	0.327984	6.07142	14.9406	0.000361115	0.00342065
ENSMUSG00000014769	Psmb1	0.290616	6.88711	14.9327	0.000362247	0.00342774
ENSMUSG00000026248	Mrpl44	0.326444	4.5482	14.9329	0.000362216	0.00342774
ENSMUSG00000021832	Psmc6	0.47014	5.95761	14.9286	0.000362832	0.00342965
ENSMUSG00000022370	Mrpl13	0.373178	5.07304	14.9294	0.00036272	0.00342965
ENSMUSG00000056131	Pgm3	-0.479385	3.913	14.9124	0.000365164	0.00344987
ENSMUSG00000044139	Prss53	-1.30916	-0.091055	14.9102	0.000365473	0.00345096
ENSMUSG00000023944	Hsp90ab1	0.389452	9.89669	14.8941	0.000367809	0.00346781
ENSMUSG00000028318	Polr1e	0.453662	2.54296	14.8939	0.000367839	0.00346781
ENSMUSG00000074361	C5ar2	-1.33837	0.136631	14.8952	0.000367652	0.00346781
ENSMUSG00000059273	Zc3h4	-0.335242	5.58528	14.8911	0.000368246	0.00346981
ENSMUSG00000024511	Rab27b	1.62708	-0.0686627	14.8884	0.000368636	0.00347166
ENSMUSG00000060802	B2m	0.413969	10.6762	14.8772	0.00037028	0.00348531
ENSMUSG00000021314	Amph	-1.74613	-0.311266	14.8698	0.000371363	0.00349366
ENSMUSG00000028671	Gale	0.976957	4.93177	14.9426	0.000372905	0.00350455
ENSMUSG00000095419	Gm14328	2.96967	-2.00645	14.8593	0.000372912	0.00350455
ENSMUSG00000015653	Steap2	-1.44831	2.54589	14.9058	0.000373199	0.00350541
ENSMUSG00000028264	Spaca1	1.2298	0.887382	14.8546	0.000373608	0.0035074
ENSMUSG00000039236	Isg20	-0.551318	3.11362	14.8502	0.000374255	0.00351164
ENSMUSG00000032898	Fbxo21	-0.980305	7.29877	14.9107	0.000375807	0.00352434
ENSMUSG00000021024	Psma6	0.276682	6.57568	14.8304	0.000377197	0.00353553
ENSMUSG00000051223	Bzw1	0.411544	6.70666	14.8262	0.000377833	0.00353963
ENSMUSG00000029417	Cxcl9	-1.06997	4.53669	14.9063	0.000379596	0.00355429
ENSMUSG00000024158	Hagh	0.480048	7.64267	14.8116	0.000380019	0.00355639
ENSMUSG00000018740	Slc25a35	0.723796	4.33384	14.8107	0.000380781	0.00356166
ENSMUSG00000062691	1110001A16Rik	0.423807	3.53855	14.7965	0.000382302	0.00357215
ENSMUSG00000003477	Inmt	-2.11658	9.46043	14.9377	0.000382863	0.00357366
ENSMUSG00000020263	Appl2	-0.435132	4.90753	14.7929	0.000382852	0.00357366
ENSMUSG00000002109	Ddb2	-0.529277	3.18832	14.7715	0.000386107	0.00360205
ENSMUSG00000019579	D17Wsu104e	0.408012	5.7953	14.766	0.000386946	0.00360612
ENSMUSG00000024177	Nme4	1.05588	1.70979	14.7669	0.000386813	0.00360612
ENSMUSG00000021095	Gsc	-2.28155	-2.37548	15.4911	0.000388291	0.00361638
ENSMUSG00000056708	Ier5	-0.816559	3.29491	14.7562	0.000388451	0.00361638
ENSMUSG00000053091	Lins	0.600486	2.3258	14.7522	0.000389072	0.00362028
ENSMUSG00000028339	Col15a1	0.941238	8.62876	14.7619	0.000390273	0.00362956
ENSMUSG00000026860	Sh3glb2	-0.457801	7.02293	14.7404	0.000390901	0.00363351
ENSMUSG00000036561	Ppp6r2	-0.287479	5.28005	14.7375	0.00039134	0.0036357
ENSMUSG00000031451	Gas6	-0.875165	7.2896	14.7814	0.00039168	0.00363697
ENSMUSG00000048138	Dmrt2	1.0174	5.1065	14.827	0.00039193	0.00363741
ENSMUSG00000017615	Tnfaip1	0.246236	5.72842	14.723	0.00039361	0.0036511
ENSMUSG00000040957	Cables1	0.703869	4.07666	14.7133	0.000395113	0.00366314
ENSMUSG00000079014	Serpina3i	-1.71796	-1.20349	14.7104	0.00039558	0.00366558
ENSMUSG00000009905	Kdsr	-0.403815	5.14653	14.7082	0.000395922	0.00366684
ENSMUSG00000074336	Apoc4	2.12213	8.00071	14.8524	0.000396433	0.00366967
ENSMUSG00000042626	Shc1	-0.235989	6.36269	14.7013	0.000397008	0.00367309
ENSMUSG00000022452	Smdt1	0.490453	6.2255	14.6951	0.000397991	0.00368028
ENSMUSG00000028664	Ephb2	1.09003	3.10396	14.7092	0.000400323	0.00369994
ENSMUSG00000052456	Asna1	0.384367	5.48753	14.6656	0.000402668	0.00371969
ENSMUSG00000062329	Cytl1	-1.64778	1.7013	14.9985	0.000403105	0.00372181
ENSMUSG00000029175	Slc35f6	0.348141	4.62312	14.6543	0.00040449	0.00373266
ENSMUSG00000061458	Nol10	0.414945	3.21904	14.652	0.000404859	0.00373414
ENSMUSG00000029221	Slc30a9	0.220933	5.93921	14.6493	0.000405291	0.0037362
ENSMUSG00000033767	D930015E06Rik	-0.450624	4.96143	14.6418	0.000406501	0.00374542
ENSMUSG00000079480	Pin4	0.457255	3.45235	14.633	0.000407932	0.00375667
ENSMUSG00000032615	Nt5m	0.647908	3.85736	14.6309	0.000408258	0.00375774
ENSMUSG00000016239	Lonrf3	1.28339	-0.0640728	14.6274	0.000408834	0.0037611
ENSMUSG00000070305	Mpzl3	0.633591	2.43986	14.6157	0.000410739	0.00377668
ENSMUSG00000028048	Gba	0.345608	5.25192	14.6077	0.000412053	0.00378682
ENSMUSG00000028779	Pef1	0.408513	6.07921	14.5959	0.000413989	0.00380266
ENSMUSG00000047330	Kcne4	-1.14815	1.36307	14.5934	0.000414398	0.00380446
ENSMUSG00000026254	Eif4e2	0.311293	5.78347	14.562	0.000419602	0.00384829
ENSMUSG00000036751	Cox6b1	0.495451	8.05827	14.5623	0.000419556	0.00384829
ENSMUSG00000001334	Fndc5	-2.70034	0.756049	14.6255	0.000419966	0.00384934
ENSMUSG00000033610	Pank1	0.748893	7.0994	14.5595	0.000420147	0.00384934
ENSMUSG00000001156	Mxd1	-0.529808	3.29247	14.5497	0.000421667	0.00385959
ENSMUSG00000026766	Mmadhc	0.322639	5.89846	14.5483	0.0004219	0.00385959
ENSMUSG00000013921	Clip3	-0.958171	2.77885	14.5424	0.000422896	0.00386477
ENSMUSG00000032526	Deb1	0.423917	4.30581	14.5423	0.000422912	0.00386477
ENSMUSG00000032409	Atr	0.520972	3.49039	14.5389	0.000423484	0.00386802
ENSMUSG00000052962	Mrpl35	0.407671	4.49173	14.5315	0.000424739	0.00387751
ENSMUSG00000001134	Uxt	0.453639	3.91508	14.5266	0.000425561	0.00388183
ENSMUSG00000027184	Caprin1	0.428632	7.10666	14.5261	0.000425647	0.00388183
ENSMUSG00000049760	2410015M20Rik	0.371591	6.27891	14.5241	0.000425993	0.003883
ENSMUSG00000029190	D5Ertd579e	0.451305	5.95005	14.5227	0.000426231	0.00388319
ENSMUSG00000027230	Creb3l1	0.647043	4.074	14.5186	0.000426918	0.00388747
ENSMUSG00000041438	Cirh1a	0.358172	4.65687	14.5159	0.000427384	0.00388974
ENSMUSG00000021615	Xrcc4	0.486968	2.58235	14.5066	0.000428971	0.0039022
ENSMUSG00000027384	Ndufaf5	0.51518	2.50711	14.5042	0.00042939	0.00390402
ENSMUSG00000038205	Prkab2	0.490791	3.27461	14.4817	0.000433259	0.0039372
ENSMUSG00000023909	Paqr4	-0.575224	4.33318	14.4704	0.000435215	0.0039506
ENSMUSG00000034157	2310044G17Rik	0.377443	5.31068	14.4681	0.000435612	0.0039506
ENSMUSG00000042426	Dhx29	0.412824	3.92636	14.468	0.000435618	0.0039506
ENSMUSG00000048782	Insc	1.49532	3.45542	14.5013	0.000435281	0.0039506
ENSMUSG00000006958	Chrd	-0.674565	4.00612	14.4489	0.00043895	0.00397881
ENSMUSG00000017428	Psmd11	0.264243	6.67612	14.4414	0.000440266	0.00398871
ENSMUSG00000028062	Lamtor2	0.456146	5.71074	14.4237	0.000443388	0.00401497
ENSMUSG00000022708	Zbtb20	-0.469129	6.23792	14.4137	0.000445168	0.00402904
ENSMUSG00000044465	Fam160a2	-0.225971	4.94657	14.4045	0.000446805	0.00404181
ENSMUSG00000028577	Plaa	0.358895	5.36981	14.4004	0.000447543	0.00404439
ENSMUSG00000063882	Uqcrh	0.441187	7.71874	14.4008	0.000447475	0.00404439
ENSMUSG00000078429	Ctdsp2	-0.305905	6.9272	14.3962	0.000448287	0.00404908
ENSMUSG00000005611	Mrvi1	-0.576929	2.75348	14.3942	0.000448653	0.00405033
ENSMUSG00000001750	Tcirg1	-0.412193	5.85556	14.3824	0.000450768	0.00406737
ENSMUSG00000027679	Dnajc19	0.350934	5.26137	14.3786	0.000451444	0.00407082
ENSMUSG00000032386	Trip4	0.41278	5.50077	14.3778	0.000451605	0.00407082
ENSMUSG00000020156	Mum1	-0.358824	5.77151	14.3539	0.000455931	0.00410774
ENSMUSG00000026034	Clk1	-0.595328	6.29259	14.3521	0.000456254	0.00410859
ENSMUSG00000027782	Kpna4	0.471278	5.40084	14.3441	0.000457713	0.0041188
ENSMUSG00000029370	Rassf6	-1.73684	3.00921	14.4298	0.000457849	0.0041188
ENSMUSG00000030591	Psmd8	0.269159	7.15614	14.3283	0.000460632	0.00414175
ENSMUSG00000026768	Itga8	-1.59924	1.66521	14.3276	0.000461927	0.00415131
ENSMUSG00000072640	Lyrm9	0.565125	2.5253	14.3198	0.000462191	0.00415159
ENSMUSG00000056121	Fez2	0.344156	5.64795	14.3162	0.000462852	0.00415544
ENSMUSG00000021022	Ppp2r3c	0.533506	3.0154	14.3123	0.000463585	0.00415993
ENSMUSG00000032080	Apoa4	3.82592	9.35441	14.4567	0.000465628	0.00417618
ENSMUSG00000039252	Lgi2	-1.38685	1.77828	14.2875	0.000468198	0.00419712
ENSMUSG00000030325	Klrb1c	-1.7677	-1.70293	14.285	0.000468679	0.00419933
ENSMUSG00000021215	Net1	-1.05316	6.73388	14.3737	0.000469373	0.00420344
ENSMUSG00000003031	Cdkn1b	-0.433856	4.53039	14.2651	0.000472418	0.00422496
ENSMUSG00000024538	Ppic	0.606321	4.92268	14.2635	0.000472721	0.00422496
ENSMUSG00000025533	Asl	-0.626431	9.03681	14.2647	0.0004725	0.00422496
ENSMUSG00000078784	1810022K09Rik	0.475726	3.58319	14.2609	0.000473213	0.00422653
ENSMUSG00000026177	Slc11a1	-0.834368	3.43422	14.2565	0.000474046	0.00423046
ENSMUSG00000025950	Idh1	0.478474	8.47622	14.2502	0.00047526	0.00423918
ENSMUSG00000077990	Gm23134	-2.6837	-1.53826	14.2432	0.000476585	0.00424747
ENSMUSG00000090841	Myl6	0.437503	8.80876	14.2367	0.000477835	0.00425578
ENSMUSG00000019977	Hbs1l	0.239894	5.71878	14.2309	0.000478935	0.00426345
ENSMUSG00000034639	Setmar	0.564064	1.96225	14.2263	0.000479819	0.00426909
ENSMUSG00000022758	P2rx6	0.908313	2.01825	14.2192	0.00048119	0.00427714
ENSMUSG00000028538	St3gal3	0.36742	6.83816	14.214	0.000482206	0.00428139
ENSMUSG00000030966	Trim21	-0.377978	3.02291	14.2115	0.000482687	0.00428139
ENSMUSG00000036097	Fam178a	-0.443328	3.6016	14.2111	0.000482767	0.00428139
ENSMUSG00000041598	Cdc42ep4	0.464012	6.38744	14.2105	0.000482865	0.00428139
ENSMUSG00000044786	Zfp36	-0.66404	6.93234	14.212	0.000482583	0.00428139
ENSMUSG00000056359	D830013O20Rik	3.09462	-2.58184	14.2051	0.000483921	0.00428862
ENSMUSG00000005609	Ctr9	0.258198	5.21193	14.1838	0.000488081	0.00432009
ENSMUSG00000025353	Ormdl2	0.300781	4.97992	14.1845	0.000487941	0.00432009
ENSMUSG00000031703	Itfg1	0.35189	5.96518	14.1832	0.000488196	0.00432009
ENSMUSG00000025420	Katnal2	-1.11201	1.45608	14.1818	0.000488473	0.0043204
ENSMUSG00000063564	Col23a1	-1.33136	1.69859	14.1694	0.000490908	0.00433979
ENSMUSG00000051934	Spats2	0.500563	3.41601	14.1669	0.000491389	0.0043419
ENSMUSG00000033825	Tpsb2	-1.70759	1.50512	14.1828	0.000491835	0.00434369
ENSMUSG00000024143	Rhoq	0.402456	5.82815	14.1606	0.000492646	0.00434871
ENSMUSG00000047502	Mroh7	-1.84526	-0.872821	14.1516	0.000494412	0.00435999
ENSMUSG00000055681	Cope	0.426848	6.90202	14.1517	0.000494405	0.00435999
ENSMUSG00000010453	Kansl3	-0.284059	6.27451	14.1476	0.000495213	0.00436491
ENSMUSG00000044086	Lmod3	2.40091	-1.17563	14.1413	0.000496463	0.00437351
ENSMUSG00000047528	Als2cr12	0.886629	2.957	14.1403	0.000496678	0.00437351
ENSMUSG00000022747	St3gal6	-0.841994	2.8473	14.1274	0.000499259	0.00439407
ENSMUSG00000087361	0610043K17Rik	-1.44893	0.336974	14.1189	0.000500957	0.00440684
ENSMUSG00000032399	Rpl4	0.267432	9.23506	14.1112	0.000502507	0.00441831
ENSMUSG00000042444	Fam63b	0.789418	4.34719	14.1332	0.000503337	0.00442343
ENSMUSG00000025175	Fn3k	-0.576656	3.81672	14.0879	0.00050723	0.00445545
ENSMUSG00000049409	Prokr1	-1.85132	-1.06342	14.7581	0.000507732	0.00445767
ENSMUSG00000024085	Man2a1	-0.529829	6.76624	14.0701	0.000510872	0.00448304
ENSMUSG00000028337	Coro2a	-0.948621	2.80586	14.0665	0.000511627	0.00448681
ENSMUSG00000053799	Exoc6	0.3649	4.41614	14.0656	0.000511804	0.00448681
ENSMUSG00000022792	Yars2	0.39706	3.63887	14.0622	0.000512502	0.00449073
ENSMUSG00000028443	Nudt2	0.462987	3.49731	14.0601	0.000512938	0.00449235
ENSMUSG00000025066	Sfr1	0.437195	5.92397	14.052	0.000514623	0.0045049
ENSMUSG00000021514	Zfp369	-0.39245	3.36749	14.0473	0.000515595	0.00451121
ENSMUSG00000026035	Ppil3	0.292835	3.56005	14.0433	0.000516417	0.00451619
ENSMUSG00000038482	Tfdp1	0.362191	4.74732	14.0398	0.000517147	0.00452036
ENSMUSG00000037419	Endod1	-0.659578	3.5235	14.0323	0.000518709	0.00453179
ENSMUSG00000030291	Med21	0.514236	3.55247	14.0278	0.000519655	0.00453784
ENSMUSG00000001366	Fbxo9	0.316539	5.88128	14.0244	0.000520366	0.00454183
ENSMUSG00000087138	Gm15545	-0.555634	2.16448	14.0148	0.000522381	0.0045572
ENSMUSG00000047702	Olfr1388	3.82007	-1.79783	16.0153	0.000522642	0.00455726
ENSMUSG00000078919	Dpm1	-0.49267	2.48463	14.0045	0.000524544	0.00457161
ENSMUSG00000040966	Slc22a2	1.27426	0.00936928	14.2797	0.000526534	0.00458555
ENSMUSG00000050541	Adra1b	-0.920247	6.11811	14.0246	0.000526657	0.00458555
ENSMUSG00000039988	Ankrd13c	0.356927	4.75746	13.9799	0.000529771	0.00461043
ENSMUSG00000055897	Ppp4r1l-ps	-0.31217	4.17223	13.9696	0.000531976	0.00462683
ENSMUSG00000068735	Trp53i11	0.662891	5.54663	13.979	0.000532173	0.00462683
ENSMUSG00000039345	Mettl22	0.473631	3.31028	13.963	0.000533402	0.00463526
ENSMUSG00000018865	Sult4a1	2.17327	-0.950475	13.9579	0.000534499	0.00464254
ENSMUSG00000019818	Cd164	0.622598	7.81264	13.9502	0.000536141	0.00465453
[truncated: 14,744 more rows]

## Sheet: Fig3Bi_ReactomePA_gKO_DE_genes
ID	Description	GeneRatio	BgRatio	pvalue	p.adjust	qvalue	geneID	Count
R-MMU-1430728	Metabolism	508/1964	1730/8828	5.99368e-15	6.42522e-12	5.28705e-12	76267/13106/269823/109857/110094/15446/59027/15484/20466/12350/70750/110695/269180/16971/13107/13179/218865/16832/22117/16993/75475/68631/56357/19125/54486/74551/14421/77582/109900/217119/51793/106861/73068/13850/104158/14042/66447/66885/671535/241447/77590/18010/18799/13076/17423/14696/104776/56045/171282/18682/14635/22166/223864/13190/74522/74637/68393/16913/18604/76969/21452/67092/97287/67260/…	508
R-MMU-9020702	Interleukin-1 signaling	55/1964	96/8828	8.47211e-14	4.54105e-11	3.73665e-11	231130/16913/93834/22187/16150/16912/11596/26441/69077/21762/23996/16175/67089/192656/16178/71966/66998/53380/19182/18412/19177/54473/19167/26409/59029/66413/108960/19184/21402/18036/23997/26445/19192/26399/93765/19166/69721/19181/16179/19170/19173/17463/70247/11820/66997/103554/26443/16151/20208/56438/57296/26440/26442/19185/19179	55
R-MMU-1236978	Cross-presentation of soluble exogenous antigens (endosomes)	35/1964	49/8828	2.65363e-13	9.48232e-11	7.80262e-11	16913/14129/17533/16912/26441/69077/21762/17534/23996/67089/66998/53380/19182/19177/19167/59029/66413/19184/23997/26445/19192/19166/19181/19170/19173/17463/70247/66997/103554/26443/57296/26440/26442/19185/19179	35
R-MMU-1234176	Oxygen-dependent proline hydroxylation of Hypoxia-inducible Factor Alpha	42/1964	66/8828	5.34659e-13	1.43289e-10	1.17906e-10	101543/16913/22187/16912/53417/26441/69077/21762/23996/67089/56550/66998/53380/19182/19177/19167/59029/66413/19184/112407/23997/26445/19192/112405/19166/19181/19170/19173/17463/70247/66997/15251/103554/26443/56438/57296/26440/22346/29806/26442/19185/19179	42
R-MMU-8951664	Neddylation	95/1964	219/8828	1.4116e-12	2.96126e-10	2.4367e-10	77113/242785/98733/74165/71393/16913/98193/142688/107986/69754/66515/233902/269529/65256/22187/231670/434130/16912/68628/53417/30843/230903/67731/76454/102323/26441/69077/66498/18002/21762/22192/26891/23996/27784/67089/56468/50933/56550/66998/71865/26754/53380/67455/19182/19177/19167/12449/12238/22200/26572/59029/108679/66413/69456/19184/21402/68842/23997/26445/26894/99311/19192/19166/19181/52245…	95
R-MMU-1234174	Cellular response to hypoxia	43/1964	70/8828	1.65742e-12	2.96126e-10	2.4367e-10	101543/16913/22187/17684/16912/53417/26441/69077/21762/23996/67089/56550/66998/53380/19182/19177/19167/59029/66413/19184/112407/23997/26445/19192/112405/19166/19181/19170/19173/17463/70247/66997/15251/103554/26443/56438/57296/26440/22346/29806/26442/19185/19179	43
R-MMU-195253	Degradation of beta-catenin by the destruction complex	46/1964	78/8828	2.22827e-12	3.41244e-10	2.80796e-10	21415/16913/22187/21416/16912/26441/69077/21762/19052/225849/23996/67089/66998/53380/19182/19177/19167/51792/26931/59029/66413/19184/21402/23997/26445/19192/12387/19166/19181/19170/19173/17463/70247/66997/103554/72345/26443/226849/56637/19053/56438/57296/26440/26442/19185/19179	46
R-MMU-392499	Metabolism of proteins	463/1964	1607/8828	5.12195e-12	6.45088e-10	5.30816e-10	319642/107652/20466/100216474/320311/236733/233744/17228/77113/242785/98733/22193/74165/17248/22658/239337/13480/17158/99683/216869/75705/53857/22260/20451/12977/104158/19128/11797/71393/18010/17342/171212/54601/20750/14696/19672/12558/231130/327942/22166/16913/26464/229595/212518/14456/98193/13032/21833/30941/53618/142688/239827/20442/57370/11555/72585/268977/24060/17283/107986/19671/29817/24622…	463
R-MMU-5610785	GLI3 is processed to GLI3R by the proteasome	37/1964	57/8828	5.41585e-12	6.45088e-10	5.30816e-10	16913/22187/16912/26441/69077/21762/23996/67089/66998/53380/19182/19177/19167/59029/66413/19184/21402/23997/26445/19192/19166/19181/19170/19173/17463/70247/66997/103554/18747/26443/56637/56438/57296/26440/26442/19185/19179	37
R-MMU-187577	SCF(Skp2)-mediated degradation of p27/p21	38/1964	60/8828	8.57944e-12	9.19716e-10	7.56797e-10	16913/12576/12566/22187/16912/12575/26441/69077/21762/23996/67089/66998/53380/19182/19177/19167/12448/59029/66413/19184/21402/23997/26445/19192/19166/19181/19170/19173/17463/70247/66997/26443/57296/26440/12447/26442/19185/19179	38
R-MMU-68827	CDT1 association with the CDC6:ORC:origin complex	37/1964	58/8828	1.17723e-11	1.14726e-09	9.44034e-10	16913/22187/16912/26441/69077/21762/23996/67089/66998/53380/19182/19177/19167/57441/59029/66413/19184/23997/26445/19192/19166/19181/26428/19170/19173/17463/70247/66997/103554/26443/26429/57296/26440/18393/26442/19185/19179	37
R-MMU-450408	AUF1 (hnRNP D0) binds and destabilizes mRNA	36/1964	56/8828	1.60695e-11	1.43554e-09	1.18125e-09	16913/22187/16912/15511/26441/69077/21762/23996/67089/66998/53380/19182/19177/19167/208643/59029/66413/19184/23997/26445/19192/18458/19166/19181/19170/19173/17463/70247/66997/103554/26443/57296/26440/26442/19185/19179	36
R-MMU-69615	G1/S DNA Damage Checkpoints	40/1964	66/8828	1.8367e-11	1.51457e-09	1.24628e-09	17248/16913/12576/12566/22187/16912/12575/26441/69077/21762/23996/67089/66998/53380/19182/19177/19167/12649/12448/59029/66413/19184/23997/26445/19192/19166/19181/19170/19173/17463/70247/66997/103554/26443/57296/26440/12447/26442/19185/19179	40
R-MMU-1168372	Downstream signaling events of B Cell Receptor (BCR)	43/1964	74/8828	2.32095e-11	1.57617e-09	1.29697e-09	18019/16913/22187/16150/16912/26441/69077/21762/23996/67089/66998/12314/53380/19182/19177/19167/59029/66413/19184/21402/18036/23997/26445/19192/19166/12313/19181/19058/19170/19173/17463/70247/66997/103554/26443/16151/15461/57296/26440/26442/19185/240354/19179	43
R-MMU-69563	p53-Dependent G1 DNA Damage Response	39/1964	64/8828	2.58956e-11	1.57617e-09	1.29697e-09	17248/16913/12576/12566/22187/16912/12575/26441/69077/21762/23996/67089/66998/53380/19182/19177/19167/12448/59029/66413/19184/23997/26445/19192/19166/19181/19170/19173/17463/70247/66997/103554/26443/57296/26440/12447/26442/19185/19179	39
R-MMU-69580	p53-Dependent G1/S DNA damage checkpoint	39/1964	64/8828	2.58956e-11	1.57617e-09	1.29697e-09	17248/16913/12576/12566/22187/16912/12575/26441/69077/21762/23996/67089/66998/53380/19182/19177/19167/12448/59029/66413/19184/23997/26445/19192/19166/19181/19170/19173/17463/70247/66997/103554/26443/57296/26440/12447/26442/19185/19179	39
R-MMU-69601	Ubiquitin Mediated Degradation of Phosphorylated Cdc25A	34/1964	52/8828	2.94062e-11	1.57617e-09	1.29697e-09	16913/22187/16912/26441/69077/21762/23996/67089/66998/53380/19182/19177/19167/12649/59029/66413/19184/23997/26445/19192/19166/19181/19170/19173/17463/70247/66997/103554/26443/57296/26440/26442/19185/19179	34
R-MMU-69610	p53-Independent DNA Damage Response	34/1964	52/8828	2.94062e-11	1.57617e-09	1.29697e-09	16913/22187/16912/26441/69077/21762/23996/67089/66998/53380/19182/19177/19167/12649/59029/66413/19184/23997/26445/19192/19166/19181/19170/19173/17463/70247/66997/103554/26443/57296/26440/26442/19185/19179	34
R-MMU-69613	p53-Independent G1/S DNA damage checkpoint	34/1964	52/8828	2.94062e-11	1.57617e-09	1.29697e-09	16913/22187/16912/26441/69077/21762/23996/67089/66998/53380/19182/19177/19167/12649/59029/66413/19184/23997/26445/19192/19166/19181/19170/19173/17463/70247/66997/103554/26443/57296/26440/26442/19185/19179	34
R-MMU-8939902	Regulation of RUNX2 expression and activity	34/1964	52/8828	2.94062e-11	1.57617e-09	1.29697e-09	16913/22187/16912/26441/69077/21762/23996/67089/66998/53380/19182/19177/19167/59029/66413/19184/21402/23997/26445/19192/19166/19181/19170/19173/17463/70247/66997/26443/56438/57296/26440/26442/19185/19179	34
R-MMU-5607761	Dectin-1 mediated noncanonical NF-kB signaling	36/1964	57/8828	3.43329e-11	1.67295e-09	1.3766e-09	16913/22187/16912/26441/69077/21762/22192/23996/67089/66998/53380/19182/19177/19167/22200/59029/66413/19184/21402/23997/26445/19192/19166/19181/19170/19173/17463/70247/66997/103554/26443/57296/26440/26442/19185/19179	36
R-MMU-5676590	NIK-->noncanonical NF-kB signaling	36/1964	57/8828	3.43329e-11	1.67295e-09	1.3766e-09	16913/22187/16912/26441/69077/21762/22192/23996/67089/66998/53380/19182/19177/19167/22200/59029/66413/19184/21402/23997/26445/19192/19166/19181/19170/19173/17463/70247/66997/103554/26443/57296/26440/26442/19185/19179	36
R-MMU-8852276	The role of GTSE1 in G2/M progression after G2 checkpoint	43/1964	75/8828	4.27943e-11	1.99459e-09	1.64127e-09	53857/16913/22187/16912/12575/26441/69077/227613/21762/23996/29870/67089/12534/22143/66998/53380/22142/19182/19177/15516/19167/13589/59029/66413/19184/23997/26445/19192/19166/19181/19170/19173/17463/70247/66997/103554/26443/22151/57296/26440/26442/19185/19179	43
R-MMU-8854050	FBXL7 down-regulates AURKA during mitotic entry and in early mitosis	35/1964	55/8828	4.72139e-11	2.03878e-09	1.67763e-09	16913/22187/16912/26441/69077/21762/23996/67089/66998/53380/19182/19177/19167/59029/66413/19184/21402/23997/26445/19192/19166/19181/19170/19173/17463/70247/66997/103554/26443/56438/57296/26440/26442/19185/19179	35
R-MMU-69202	Cyclin E associated events during G1/S transition	41/1964	70/8828	4.78442e-11	2.03878e-09	1.67763e-09	16913/12576/12566/22187/16912/12575/26441/69077/21762/63955/23996/67089/19645/66998/53380/19182/19177/19167/12448/59029/66413/19184/21402/23997/26445/19192/19166/19181/19170/19173/17463/70247/66997/26443/57296/26440/12447/26442/19185/66671/19179	41
R-MMU-446652	Interleukin-1 family signaling	55/1964	108/8828	4.94481e-11	2.03878e-09	1.67763e-09	231130/16913/93834/22187/16150/16912/11596/26441/69077/21762/23996/16175/67089/192656/16178/71966/66998/53380/19182/18412/19177/54473/19167/26409/59029/66413/108960/19184/21402/18036/23997/26445/19192/26399/93765/19166/69721/19181/16179/19170/19173/17463/70247/11820/66997/103554/26443/16151/20208/56438/57296/26440/26442/19185/19179	55
R-MMU-5607764	CLEC7A (Dectin-1) signaling	47/1964	86/8828	5.31294e-11	2.10943e-09	1.73577e-09	18019/20779/16913/22187/16150/16912/26441/69077/21762/22192/23996/67089/56550/66998/12314/53380/19182/19177/19167/26409/22200/59029/66413/19184/216150/21402/23997/26445/19192/19166/12313/19181/19058/19170/19173/17463/70247/66997/103554/26443/16151/57296/26440/26442/19185/240354/19179	47
R-MMU-1169091	Activation of NF-kappaB in B cells	38/1964	63/8828	7.22022e-11	2.76431e-09	2.27464e-09	16913/22187/16150/16912/26441/69077/21762/23996/67089/66998/53380/19182/19177/19167/59029/66413/19184/21402/18036/23997/26445/19192/19166/19181/19170/19173/17463/70247/66997/103554/26443/16151/57296/26440/26442/19185/240354/19179	38
R-MMU-350562	Regulation of ornithine decarboxylase (ODC)	33/1964	51/8828	8.78234e-11	3.13822e-09	2.58231e-09	16913/16912/26441/69077/21762/23996/67089/66998/53380/19182/19177/19167/59029/66413/19184/23997/26445/19192/19166/19181/19170/19173/17463/70247/66997/103554/54375/26443/57296/26440/26442/19185/19179	33
R-MMU-75815	Ubiquitin-dependent degradation of Cyclin D	33/1964	51/8828	8.78234e-11	3.13822e-09	2.58231e-09	16913/22187/16912/26441/69077/21762/23996/67089/66998/53380/19182/19177/19167/59029/66413/19184/23997/26445/19192/19166/19181/19170/19173/17463/70247/66997/103554/26443/57296/26440/26442/19185/19179	33
R-MMU-5610780	Degradation of GLI1 by the proteasome	35/1964	56/8828	9.91211e-11	3.42767e-09	2.82049e-09	16913/22187/16912/26441/69077/21762/23996/67089/66998/53380/19182/19177/19167/59029/66413/19184/21402/23997/26445/19192/19166/19181/19170/19173/17463/70247/66997/103554/26443/56438/57296/26440/26442/19185/19179	35
R-MMU-69017	CDK-mediated phosphorylation and removal of Cdc6	41/1964	72/8828	1.62824e-10	5.2893e-09	4.35235e-09	16913/12566/22187/16912/26441/69077/68999/21762/23996/67089/75430/66998/53380/19182/19177/19167/12448/59029/66413/19184/23997/26445/19192/19166/19181/19170/19173/17463/70247/66997/103554/26443/68612/52717/57296/26440/12447/26442/19185/69957/19179	41
R-MMU-69656	Cyclin A:Cdk2-associated events at S phase entry	41/1964	72/8828	1.62824e-10	5.2893e-09	4.35235e-09	16913/12576/12566/22187/16912/12575/26441/69077/21762/63955/23996/67089/19645/66998/53380/19182/19177/19167/12448/59029/66413/19184/21402/23997/26445/19192/19166/19181/19170/19173/17463/70247/66997/26443/57296/26440/12447/26442/19185/66671/19179	41
R-MMU-68867	Assembly of the pre-replicative complex	39/1964	67/8828	1.84555e-10	5.63648e-09	4.63803e-09	16913/22187/16912/242705/26441/69077/21762/23996/67089/66998/53380/19182/19177/19167/57441/59029/66413/19184/23997/26445/19192/19166/13557/19181/26428/19170/19173/17463/70247/66997/103554/26443/26429/57296/26440/18393/26442/19185/19179	39
R-MMU-8939236	RUNX1 regulates transcription of genes involved in differentiation of HSCs	39/1964	67/8828	1.84555e-10	5.63648e-09	4.63803e-09	16825/16909/16913/22187/16912/14461/214162/26441/69077/21762/23996/67089/66998/53380/19182/19177/19167/59029/66413/19184/23997/26445/19192/19166/19181/19170/19173/17463/70247/66997/103554/26443/22601/57296/26440/26442/19185/66671/19179	39
R-MMU-349425	Autodegradation of the E3 ubiquitin ligase COP1	33/1964	52/8828	1.89285e-10	5.63648e-09	4.63803e-09	16913/22187/16912/26441/69077/21762/23996/67089/66998/53380/19182/19177/19167/59029/66413/19184/23997/26445/19192/19166/19181/19170/19173/17463/70247/66997/103554/26443/57296/26440/26442/19185/19179	33
R-MMU-4641258	Degradation of DVL	35/1964	57/8828	2.02193e-10	5.85814e-09	4.82043e-09	16913/13543/22187/16912/26441/69077/21762/23996/67089/66998/53380/19182/19177/19167/59029/66413/19184/23997/26445/19192/19166/19181/19170/19173/17463/70247/66997/103554/26443/56438/57296/26440/26442/19185/19179	35
R-MMU-5621481	C-type lectin receptors (CLRs)	52/1964	103/8828	2.51599e-10	6.91575e-09	5.69069e-09	56620/18019/20779/16913/14127/22187/16150/16912/26441/69077/21762/22192/23996/67089/56550/66998/12314/53380/19182/19177/19167/26409/22200/59029/66413/19184/216150/21402/23997/26445/19192/110157/19166/12313/19181/19058/19170/19173/17463/70247/66997/103554/18747/26443/16151/15461/57296/26440/26442/19185/240354/19179	52
R-MMU-69206	G1/S Transition	52/1964	103/8828	2.51599e-10	6.91575e-09	5.69069e-09	18969/16913/12576/12566/22187/16912/12575/26441/69077/21762/19052/63955/23996/67089/19645/66998/53380/12544/19182/19177/19167/51792/66979/12448/57441/59029/66413/19184/21402/23997/26445/19192/19166/19181/26428/19170/19173/17463/70247/66997/27214/26443/26429/19053/57296/26440/12447/18393/26442/19185/66671/19179	52
R-MMU-2871837	FCERI mediated NF-kB activation	41/1964	73/8828	2.92281e-10	7.83314e-09	6.44557e-09	16913/14127/22187/16150/16912/26441/69077/21762/23996/67089/56550/66998/53380/19182/19177/19167/26409/59029/66413/19184/216150/21402/23997/26445/19192/19166/19181/19170/19173/17463/70247/66997/103554/26443/16151/57296/26440/26442/19185/240354/19179	41
R-MMU-174084	Autodegradation of Cdh1 by Cdh1:APC/C	37/1964	63/8828	3.80041e-10	9.93669e-09	8.1765e-09	16913/22187/16912/26441/69077/68999/21762/23996/67089/75430/66998/53380/19182/19177/19167/59029/66413/19184/23997/26445/19192/19166/19181/19170/19173/17463/70247/66997/26443/68612/52717/57296/26440/26442/19185/69957/19179	37
R-MMU-8941858	Regulation of RUNX3 expression and activity	33/1964	53/8828	3.9504e-10	1.00829e-08	8.29683e-09	20779/16913/22187/16912/26441/69077/21762/23996/67089/66998/53380/19182/19177/19167/59029/66413/19184/23997/26445/19192/19166/19181/19170/19173/17463/70247/66997/26443/57296/26440/26442/19185/19179	33
R-MMU-69002	DNA Replication Pre-Initiation	44/1964	82/8828	4.85018e-10	1.20916e-08	9.9497e-09	18969/16913/12566/22187/16912/242705/26441/69077/21762/23996/67089/66998/53380/12544/19182/19177/19167/66979/57441/59029/66413/19184/23997/26445/19192/19166/13557/19181/26428/19170/19173/17463/70247/66997/103554/27214/26443/26429/57296/26440/18393/26442/19185/19179	44
R-MMU-69541	Stabilization of p53	34/1964	56/8828	5.67592e-10	1.38286e-08	1.1379e-08	17248/16913/22187/16912/26441/69077/21762/23996/67089/66998/53380/19182/19177/19167/59029/66413/19184/23997/26445/19192/19166/19181/19170/19173/17463/70247/66997/103554/26443/57296/26440/26442/19185/19179	34
R-MMU-453279	Mitotic G1-G1/S phases	59/1964	126/8828	7.33818e-10	1.71515e-08	1.41133e-08	19646/18969/12577/20779/16913/12576/12566/22187/16912/12575/242705/26441/69077/21762/19052/63955/23996/67089/19645/66998/53380/12544/19182/19177/19167/51792/66979/12448/57441/59029/66413/19184/21402/23997/26445/19192/19166/13557/12444/19181/26428/19170/19173/17463/70247/66997/27214/26443/26429/19053/57296/26440/21781/12447/18393/26442/19185/66671/19179	59
R-MMU-174184	Cdc20:Phospho-APC/C mediated degradation of Cyclin A	40/1964	72/8828	7.51978e-10	1.71515e-08	1.41133e-08	16913/22187/16912/26441/69077/68999/21762/23996/67089/12534/75430/66998/53380/19182/19177/19167/12237/59029/66413/19184/23997/26445/19192/19166/19181/19170/19173/17463/70247/66997/103554/26443/68612/52717/57296/26440/26442/19185/69957/19179	40
R-MMU-5687128	MAPK6/MAPK4 signaling	40/1964	72/8828	7.51978e-10	1.71515e-08	1.41133e-08	16913/22187/16912/545156/26441/69077/21762/23996/67089/12534/66998/53380/19182/19177/19167/235072/18612/59029/66413/19184/23997/12540/26445/19192/19166/19181/19170/19173/17463/70247/66997/103554/18747/26443/50772/57296/26440/26442/19185/19179	40
R-MMU-174154	APC/C:Cdc20 mediated degradation of Securin	38/1964	67/8828	8.94297e-10	1.99726e-08	1.64347e-08	16913/22187/16912/26441/69077/68999/21762/23996/67089/75430/66998/53380/19182/19177/19167/59029/66413/19184/23997/26445/19192/19166/19181/19170/19173/17463/70247/66997/103554/26443/68612/52717/57296/26440/26442/19185/69957/19179	38
R-MMU-69052	Switching of origins to a post-replicative state	46/1964	89/8828	1.00903e-09	2.18958e-08	1.80172e-08	16913/12566/22187/16912/26441/69077/68999/21762/23996/67089/75430/66998/53380/19182/19177/19167/12448/59029/66413/19184/21402/23997/26445/19192/19166/19181/26428/19170/19173/17463/70247/66997/103554/26443/68612/52717/26429/56438/57296/26440/12447/18393/26442/19185/69957/19179	46
R-MMU-5358346	Hedgehog ligand biogenesis	36/1964	62/8828	1.02126e-09	2.18958e-08	1.80172e-08	214240/16913/22187/16912/26441/69077/21762/23996/269523/67089/66998/53380/19182/19177/19167/59029/66413/19184/23997/26445/19192/19166/19181/19170/19173/17463/70247/66997/103554/18453/26443/57296/26440/26442/19185/19179	36
R-MMU-68949	Orc1 removal from chromatin	39/1964	70/8828	1.09575e-09	2.30322e-08	1.89523e-08	16913/12566/22187/16912/26441/69077/21762/23996/67089/66998/53380/19182/19177/19167/59029/66413/19184/21402/23997/26445/19192/19166/19181/26428/19170/19173/17463/70247/66997/103554/26443/26429/56438/57296/26440/18393/26442/19185/19179	39
R-MMU-179419	APC:Cdc20 mediated degradation of cell cycle proteins prior to satisfation of the cell cycle checkpoint	40/1964	73/8828	1.30919e-09	2.69894e-08	2.22085e-08	16913/22187/16912/26441/69077/68999/21762/23996/67089/12534/75430/66998/53380/19182/19177/19167/12237/59029/66413/19184/23997/26445/19192/19166/19181/19170/19173/17463/70247/66997/103554/26443/68612/52717/57296/26440/26442/19185/69957/19179	40
R-MMU-4641257	Degradation of AXIN	33/1964	55/8828	1.57539e-09	3.18645e-08	2.622e-08	16913/22187/16912/26441/69077/21762/23996/67089/66998/53380/19182/19177/19167/59029/66413/19184/23997/26445/19192/19166/19181/19170/19173/17463/70247/66997/103554/26443/57296/26440/26442/19185/19179	33
R-MMU-176409	APC/C:Cdc20 mediated degradation of mitotic proteins	40/1964	75/8828	3.78244e-09	7.50885e-08	6.17873e-08	16913/22187/16912/26441/69077/68999/21762/23996/67089/12534/75430/66998/53380/19182/19177/19167/12237/59029/66413/19184/23997/26445/19192/19166/19181/19170/19173/17463/70247/66997/103554/26443/68612/52717/57296/26440/26442/19185/69957/19179	40
R-MMU-4608870	Asymmetric localization of PCP proteins	35/1964	62/8828	4.90647e-09	9.56317e-08	7.86914e-08	16913/14362/13543/22187/16912/26441/69077/21762/23996/67089/66998/53380/19182/19177/19167/59029/66413/19184/23997/26445/19192/19166/19181/19170/19173/17463/70247/66997/103554/26443/57296/26440/26442/19185/19179	35
R-MMU-176814	Activation of APC/C and APC/C:Cdc20 mediated degradation of mitotic proteins	40/1964	76/8828	6.28524e-09	1.20318e-07	9.90044e-08	16913/22187/16912/26441/69077/68999/21762/23996/67089/12534/75430/66998/53380/19182/19177/19167/12237/59029/66413/19184/23997/26445/19192/19166/19181/19170/19173/17463/70247/66997/103554/26443/68612/52717/57296/26440/26442/19185/69957/19179	40
R-MMU-351202	Metabolism of polyamines	34/1964	60/8828	7.12301e-09	1.33963e-07	1.10232e-07	16913/16912/26441/69077/21762/23996/67089/66998/53380/19182/19177/19167/59029/66413/19184/23997/26445/19192/20810/19166/19181/19170/19173/17463/70247/66997/103554/54375/26443/57296/26440/26442/19185/19179	34
R-MMU-8878166	Transcriptional regulation by RUNX2	35/1964	63/8828	8.69429e-09	1.60695e-07	1.32229e-07	16913/22187/16912/26441/69077/21762/23996/67089/12534/66998/53380/19182/19177/19167/59029/66413/19184/21402/23997/26445/19192/19166/19181/19170/19173/17463/70247/66997/26443/56438/57296/26440/26442/19185/19179	35
R-MMU-983169	Class I MHC mediated antigen processing & presentation	122/1964	345/8828	9.8869e-09	1.7964e-07	1.47818e-07	387524/75234/77113/242785/21355/19647/22193/68098/74165/17970/99683/80898/211007/19155/71393/14991/94091/16913/142688/21354/218215/69754/15015/208650/66515/233902/79263/269529/15040/65256/20437/14129/22187/231670/17533/16912/68628/81018/69807/30843/230903/76580/67731/76454/22195/26441/66397/69077/68999/110379/21762/17534/66663/22192/23996/67089/12010/22201/56550/66998/22209/100763/71865/53380/674…	122
R-MMU-174178	APC/C:Cdh1 mediated degradation of Cdc20 and other APC/C:Cdh1 targeted proteins in late mitosis/early G1	38/1964	72/8828	1.35976e-08	2.42944e-07	1.99909e-07	16913/22187/16912/26441/69077/68999/21762/23996/67089/75430/66998/53380/19182/19177/19167/59029/66413/19184/23997/26445/19192/19166/19181/19170/19173/17463/70247/66997/103554/26443/68612/52717/57296/26440/26442/19185/69957/19179	38
R-MMU-983705	Signaling by the B Cell Receptor (BCR)	47/1964	98/8828	1.52672e-08	2.68302e-07	2.20775e-07	18019/16913/83490/22187/16150/16912/20866/26441/69077/21762/23996/67089/66998/12314/17973/53380/19182/19177/19167/59029/66413/19184/21402/18036/23997/26445/19192/19166/58194/12313/19181/19058/19170/19173/17463/70247/66997/103554/26443/16151/15461/57296/26440/26442/19185/240354/19179	47
R-MMU-5658442	Regulation of RAS by GAPs	36/1964	67/8828	1.75735e-08	3.03852e-07	2.50027e-07	54153/16913/22187/16912/26441/69077/21762/23996/67089/66998/53380/19182/19177/19167/59029/66413/19184/23997/26445/19192/19166/19181/19170/19173/17463/70247/66997/103554/26443/15461/56438/57296/26440/26442/19185/19179	36
R-MMU-1236975	Antigen processing-Cross presentation	45/1964	93/8828	2.19046e-08	3.72727e-07	3.06702e-07	21355/17970/14991/16913/21354/15015/15040/14129/17533/16912/26441/69077/21762/17534/23996/67089/12010/66998/53380/19182/19177/19167/59029/66413/19184/23997/26445/19192/19166/19181/19170/19173/17463/20333/70247/66997/103554/26443/22319/57296/26440/16419/26442/19185/19179	45
R-MMU-174143	APC/C-mediated degradation of cell cycle proteins	41/1964	83/8828	4.4062e-08	7.15673e-07	5.88898e-07	16913/12566/22187/16912/26441/69077/68999/21762/23996/67089/12534/75430/66998/53380/19182/19177/19167/12237/59029/66413/19184/23997/26445/19192/19166/19181/19170/19173/17463/70247/66997/103554/26443/68612/52717/57296/26440/26442/19185/69957/19179	41
R-MMU-202424	Downstream TCR signaling	41/1964	83/8828	4.4062e-08	7.15673e-07	5.88898e-07	16913/22187/16150/16912/26441/69077/21762/23996/67089/192656/56550/66998/53380/19182/19177/19167/26409/59029/66413/19184/216150/21402/23997/26445/19192/19166/19181/19170/19173/17463/70247/66997/103554/26443/16151/57296/26440/26442/19185/240354/19179	41
R-MMU-453276	Regulation of mitotic cell cycle	41/1964	83/8828	4.4062e-08	7.15673e-07	5.88898e-07	16913/12566/22187/16912/26441/69077/68999/21762/23996/67089/12534/75430/66998/53380/19182/19177/19167/12237/59029/66413/19184/23997/26445/19192/19166/19181/19170/19173/17463/70247/66997/103554/26443/68612/52717/57296/26440/26442/19185/69957/19179	41
R-MMU-450531	Regulation of mRNA stability by proteins that bind AU-rich elements	42/1964	86/8828	4.59783e-08	7.24835e-07	5.96437e-07	16913/16549/22187/22695/16912/15511/26441/69077/66583/21762/23996/67089/66998/53380/19182/19177/19167/50911/208643/59029/66413/19184/23997/26445/19192/18458/19166/19181/19170/19173/17463/70247/66997/103554/17164/26443/56086/57296/26440/26442/19185/19179	42
R-MMU-5368287	Mitochondrial translation	42/1964	86/8828	4.59783e-08	7.24835e-07	5.96437e-07	67036/64655/67871/14548/66258/121022/69163/68611/64659/68537/64656/320806/66973/65111/27397/94063/94064/75398/66121/56282/67681/118451/66223/28030/107733/67270/69956/66230/50529/67212/68565/28028/19935/66292/107732/18120/27395/107734/64658/66448/66407/216767	42
R-MMU-2262752	Cellular responses to stress	143/1964	431/8828	5.80119e-08	9.01286e-07	7.41631e-07	101543/17248/17970/19646/14281/53857/104248/216805/66237/22166/16913/219158/15081/15361/12576/15512/21750/12566/22187/14775/17684/16912/53417/14778/15511/16476/268933/27060/12575/26441/12345/18141/69077/68999/20656/11973/26462/110379/22627/227613/21762/13627/23996/269523/67089/19645/22143/75430/12151/56550/66998/53380/66144/66403/22142/19182/19177/15516/56717/19167/80888/54130/11757/12448/59029/1…	143
R-MMU-69306	DNA Replication	54/1964	123/8828	6.13298e-08	9.39222e-07	7.72848e-07	18969/67967/16913/12566/22187/16912/242705/26441/69077/68999/21762/23996/67089/75430/66998/53380/12544/19182/19177/19167/66979/12448/57441/59029/66413/19184/21402/23997/26445/19192/19166/13557/19181/26428/19170/19173/17463/70247/66997/103554/27214/26443/68612/52717/26429/56438/57296/26440/12447/18393/26442/19185/69957/19179	54
R-MMU-8953897	Cellular responses to external stimuli	143/1964	433/8828	8.00903e-08	1.20925e-06	9.95043e-07	101543/17248/17970/19646/14281/53857/104248/216805/66237/22166/16913/219158/15081/15361/12576/15512/21750/12566/22187/14775/17684/16912/53417/14778/15511/16476/268933/27060/12575/26441/12345/18141/69077/68999/20656/11973/26462/110379/22627/227613/21762/13627/23996/269523/67089/19645/22143/75430/12151/56550/66998/53380/66144/66403/22142/19182/19177/15516/56717/19167/80888/54130/11757/12448/59029/1…	143
R-MMU-5419276	Mitochondrial translation termination	41/1964	85/8828	1.03051e-07	1.53431e-06	1.26252e-06	67036/64655/67871/14548/66258/121022/69163/68611/64659/68537/64656/320806/66973/65111/27397/94063/94064/75398/66121/56282/67681/118451/66223/107733/67270/69956/66230/50529/67212/68565/28028/19935/66292/107732/18120/27395/107734/64658/66448/66407/216767	41
R-MMU-8948751	Regulation of PTEN stability and activity	35/1964	68/8828	1.15797e-07	1.70048e-06	1.39925e-06	16913/22187/16912/26441/69077/21762/23996/67089/66998/53380/19182/19177/19167/59029/66413/19184/23997/26445/19192/19166/19181/19170/73162/19173/17463/12995/70247/66997/103554/26443/57296/26440/26442/19185/19179	35
R-MMU-597592	Post-translational protein modification	352/1964	1257/8828	1.31724e-07	1.90822e-06	1.5702e-06	319642/107652/20466/100216474/320311/236733/233744/77113/242785/98733/22193/74165/17248/22658/239337/13480/17158/99683/216869/53857/22260/20451/12977/19128/11797/71393/18010/17342/171212/54601/20750/19672/12558/231130/327942/16913/26464/229595/212518/14456/98193/13032/21833/30941/53618/142688/239827/20442/57370/11555/72585/268977/24060/17283/107986/19671/29817/246228/69754/109979/224139/15248/122…	352
R-MMU-5389840	Mitochondrial translation elongation	40/1964	83/8828	1.51772e-07	2.16933e-06	1.78505e-06	67036/64655/14548/66258/121022/69163/68611/64659/68537/64656/66973/65111/27397/94063/94064/75398/66121/56282/67681/118451/66223/28030/107733/67270/69956/66230/50529/67212/68565/28028/19935/66292/107732/18120/27395/107734/64658/66448/66407/216767	40
R-MMU-1428517	The citric acid (TCA) cycle and respiratory electron transport	56/1964	133/8828	1.98829e-07	2.80454e-06	2.30774e-06	16832/18604/20917/11957/66377/17993/66495/66108/26940/18597/68342/170718/68194/27402/14651/20916/76947/66916/22333/11949/227197/11947/407785/235339/13382/68263/17448/66925/67834/76916/12974/67876/68493/16828/66046/17436/595136/78330/27425/66841/66052/228026/22229/14874/68375/68349/230075/28080/67273/70316/66414/72900/69487/228033/20501/11946	56
R-MMU-983168	Antigen processing: Ubiquitination & Proteasome degradation	101/1964	286/8828	2.04829e-07	2.85165e-06	2.3465e-06	387524/75234/77113/242785/19647/22193/68098/74165/211007/19155/71393/94091/16913/142688/218215/69754/208650/66515/233902/79263/269529/65256/20437/22187/231670/16912/68628/81018/69807/30843/230903/76580/67731/76454/22195/26441/69077/68999/21762/66663/22192/23996/67089/22201/56550/66998/22209/100763/71865/53380/67455/19182/19177/19167/104184/12449/22200/59029/268291/66413/19184/216150/21402/98766/2…	101
R-MMU-8878159	Transcriptional regulation by RUNX3	38/1964	78/8828	2.16954e-07	2.98172e-06	2.45354e-06	21415/20779/16913/22187/21416/16912/26441/69077/21762/23996/67089/66998/53380/19182/19177/19167/59029/66413/19184/23997/26445/19192/12387/19166/19181/19170/19173/17463/70247/66997/26443/21679/22601/57296/26440/26442/19185/19179	38
R-MMU-446203	Asparagine N-linked glycosylation	93/1964	259/8828	2.63097e-07	3.57012e-06	2.93771e-06	107652/13480/17158/99683/53857/20451/18010/13032/53618/20442/57370/24060/224139/109785/54613/22187/218138/26938/20443/89867/214895/20440/12847/68581/12345/66397/29858/110379/227613/56418/269523/12764/52014/59042/22143/56494/381903/54128/67422/70349/99412/22142/245828/19359/21787/66248/54161/66676/60409/70361/108123/54130/193813/67857/13136/14067/56737/20334/235661/66050/56041/76983/56386/59288/22…	93
R-MMU-2454202	Fc epsilon receptor (FCERI) signaling	50/1964	115/8828	2.719e-07	3.64346e-06	2.99805e-06	14281/18019/16913/14127/20416/22187/16150/16912/16476/26441/69077/21762/23996/67089/56550/66998/12314/53380/19182/19177/19167/26409/59029/66413/19184/216150/21402/23997/26445/19192/19166/12313/19181/19058/19170/19173/17463/70247/66997/103554/26443/16151/26398/15461/57296/26440/26442/19185/240354/19179	50
R-MMU-168249	Innate Immune System	268/1964	928/8828	3.49923e-07	4.63108e-06	3.81073e-06	319642/22177/384309/12796/105245/628900/18733/19152/319430/16993/83382/19204/12512/76025/17970/18792/14281/12267/54131/241633/27007/19128/11797/18010/56620/19261/66237/216445/18019/54445/20779/231130/232801/14991/227753/22166/16913/14127/13032/109828/232413/83433/19271/246228/18173/17025/20416/12268/17882/15015/93834/217304/18806/18436/12475/102595/15040/14129/74012/19200/63986/22187/12263/20193/…	268
R-MMU-199977	ER to Golgi Anterograde Transport	59/1964	146/8828	5.14754e-07	6.72946e-06	5.5374e-06	99683/53857/13032/224139/89867/214895/12847/68581/12345/66397/110379/227613/56418/59042/22143/56494/70349/99412/22142/245828/21787/54161/66676/60409/70361/108123/54130/193813/67857/13136/14067/20334/235661/66050/56041/76983/59288/50797/69162/213827/12068/56334/11840/12343/69608/12793/11843/18195/66226/56444/20333/108124/67542/338366/68097/56447/22151/105522/74498	59
R-MMU-69239	Synthesis of DNA	49/1964	115/8828	7.45639e-07	9.63042e-06	7.92448e-06	18969/67967/16913/12566/22187/16912/26441/69077/68999/21762/23996/67089/75430/66998/53380/19182/19177/19167/66979/12448/59029/66413/19184/21402/23997/26445/19192/19166/19181/26428/19170/19173/17463/70247/66997/103554/26443/68612/52717/26429/56438/57296/26440/12447/18393/26442/19185/69957/19179	49
R-MMU-453274	Mitotic G2-G2/M phases	69/1964	181/8828	7.82363e-07	9.98444e-06	8.21579e-06	329251/236266/53857/18541/16913/12566/22187/76816/16912/27373/12575/26441/69077/22627/225659/227613/21762/19052/23996/29870/67089/12534/22143/66998/53380/22142/19182/19177/15516/19167/51792/51885/13589/54130/59029/231123/66413/19184/21402/23997/103733/26445/19192/19166/66296/13557/19181/76707/19170/19173/17463/70247/66997/103554/71648/18747/75296/26443/22151/22154/19053/56438/57296/26440/26442/19…	69
R-MMU-72766	Translation	81/1964	223/8828	9.12334e-07	1.15061e-05	9.46794e-06	75705/67036/64655/22121/67160/56347/67871/26905/13665/20813/13627/14548/66258/121022/69163/78655/665155/68611/64659/68537/20005/108067/64656/16898/320806/208643/66973/27979/65111/27397/67204/94063/94064/75398/66121/67941/56282/67891/13684/18458/67681/66661/118451/66223/28030/107733/16785/67270/69956/66230/50529/13669/209354/67212/13681/19951/68028/217869/68565/28028/19935/66292/19988/107732/22536…	81
R-MMU-202403	TCR signaling	44/1964	100/8828	9.39484e-07	1.15762e-05	9.52556e-06	23880/16913/19271/22187/16150/16912/26441/69077/21762/23996/67089/192656/56550/66998/17973/53380/19182/19177/19167/26409/59029/66413/19184/216150/21402/23997/26445/19192/19166/19181/19170/19173/17463/70247/66997/103554/26443/16151/57296/26440/26442/19185/240354/19179	44
R-MMU-382556	ABC-family proteins mediated transport	44/1964	100/8828	9.39484e-07	1.15762e-05	9.52556e-06	76184/16913/22187/16912/26441/69077/21762/26905/13665/23996/269523/67089/66998/53380/54197/19182/19177/19167/27409/67204/59029/66413/19184/23997/26445/19192/11307/19166/19181/19170/19173/17463/70247/66997/103554/26443/19299/56199/57296/26440/224742/26442/19185/19179	44
R-MMU-5668541	TNFR2 non-canonical NF-kB pathway	43/1964	97/8828	9.73209e-07	1.18555e-05	9.75537e-06	11797/16913/230979/22187/21934/16912/21940/26441/69077/21762/22192/23996/67089/66998/53380/19182/19177/19167/22031/22200/59029/66413/19184/21402/23997/26445/19192/19166/19181/18383/19170/19173/22030/17463/70247/66997/103554/26443/57296/26440/26442/19185/19179	43
R-MMU-69275	G2/M Transition	68/1964	179/8828	1.08878e-06	1.31143e-05	1.07912e-05	329251/236266/53857/18541/16913/12566/22187/76816/16912/27373/12575/26441/69077/22627/225659/227613/21762/19052/23996/29870/67089/12534/22143/66998/53380/22142/19182/19177/15516/19167/51792/51885/13589/54130/59029/231123/66413/19184/21402/23997/103733/26445/19192/19166/66296/19181/76707/19170/19173/17463/70247/66997/103554/71648/18747/75296/26443/22151/22154/19053/56438/57296/26440/26442/19185/66…	68
R-MMU-204005	COPII-mediated vesicle transport	33/1964	68/8828	1.51202e-06	1.80098e-05	1.48195e-05	99683/13032/89867/214895/68581/66397/110379/56418/56494/99412/245828/21787/60409/70361/108123/193813/67857/14067/20334/66050/56041/76983/69162/12068/56334/69608/12793/18195/66226/20333/108124/105522/74498	33
R-MMU-948021	Transport to the Golgi and subsequent modification	66/1964	174/8828	1.66315e-06	1.95922e-05	1.61217e-05	17158/99683/53857/20451/13032/53618/57370/224139/20443/89867/214895/20440/12847/68581/12345/66397/110379/227613/56418/59042/22143/56494/70349/99412/22142/245828/21787/54161/66676/60409/70361/108123/54130/193813/67857/13136/14067/20334/235661/66050/56041/76983/56386/59288/50797/69162/213827/12068/56334/11840/12343/69608/12793/11843/18195/66226/56444/20333/108124/67542/338366/68097/56447/22151/1055…	66
R-MMU-6807070	PTEN Regulation	47/1964	112/8828	2.10166e-06	2.44889e-05	2.01509e-05	19646/16913/23942/22187/16912/26441/69077/21762/23996/67089/12151/66998/53380/19182/19177/56717/19167/59029/66413/68441/66096/19184/23997/26445/19192/19166/19181/17192/66508/19170/73162/19173/17463/12995/70247/66997/103554/26443/68576/83409/54170/57296/26440/26442/19185/19179/19744	47
R-MMU-191273	Cholesterol biosynthesis	17/1964	26/8828	2.90595e-06	3.34966e-05	2.7563e-05	319554/208715/13360/18194/17855/20775/110460/68603/13121/13595/15490/192156/16987/73166/235293/74754/110196	17
R-MMU-5610787	Hedgehog 'off' state	44/1964	104/8828	3.40451e-06	3.88259e-05	3.19483e-05	16913/22187/16912/26441/69077/227613/21762/23996/67089/22143/66998/53380/22142/19182/19177/19167/59029/66413/19184/21402/23997/26445/19192/19166/19181/19170/19173/17463/70247/66997/103554/18747/271639/26443/22151/22158/56637/224129/56438/57296/26440/26442/19185/19179	44
R-MMU-9639288	Amino acids regulate mTORC1	27/1964	53/8828	4.18492e-06	4.72235e-05	3.88583e-05	216805/66237/268933/27060/11973/110379/66144/56717/108664/66290/68441/66096/73834/66508/319481/11964/11974/17168/11972/114143/72124/66335/68576/83409/54170/11966/19744	27
R-MMU-4086400	PCP/CE pathway	38/1964	86/8828	4.52496e-06	5.05287e-05	4.1578e-05	216869/16913/14362/13543/22187/16912/26441/69077/21762/23996/67089/66998/53380/19182/19177/19167/11771/59029/66413/19184/23997/26445/19192/19166/19181/19170/19173/17463/70247/66997/74325/103554/26443/57296/26440/26442/19185/19179	38
R-MMU-168256	Immune System	443/1964	1685/8828	7.06719e-06	7.81034e-05	6.42681e-05	319642/387524/75234/22177/384309/12796/13649/105245/77113/242785/628900/18576/14587/21355/22318/18733/19647/19152/16195/24014/70686/319430/22193/16993/68098/83382/19204/12512/74165/76025/17970/11600/99683/216869/18792/14281/23880/233046/53857/231474/80898/12267/54131/12977/241633/14173/27007/211007/19155/19128/54153/11797/71393/76089/18010/56620/13385/19261/66237/216445/18019/54445/20779/231130/2…	443
R-MMU-199991	Membrane Trafficking	162/1964	538/8828	7.37939e-06	8.07215e-05	6.64224e-05	319642/76954/228960/13649/105245/22318/13423/233204/72121/99683/216869/53857/227801/72318/319934/20779/229541/70785/13032/12223/11555/106628/80708/194590/224139/13543/22187/209773/74438/218038/69178/14269/89867/214895/12847/68581/12345/224617/66397/68299/110379/22627/11769/227613/18002/56085/26891/76895/56418/11782/56324/11465/59042/22143/56494/16562/269774/68953/105513/22088/70349/26754/67602/99…	162
R-MMU-5632684	Hedgehog 'on' state	36/1964	82/8828	9.58297e-06	0.000103767	8.53857e-05	216869/14451/16913/22187/16912/26441/69077/21762/23996/67089/66998/53380/19182/19177/19167/59029/66413/19184/23997/26445/19192/19166/19181/19170/19173/17463/70247/66997/103554/26443/56438/57296/26440/26442/19185/19179	36
R-MMU-69242	S Phase	54/1964	142/8828	1.31869e-05	0.000141363	0.000116322	18969/67967/16913/12576/12566/22187/16912/12575/26441/69077/68999/21762/63955/23996/67089/19645/75430/66998/53380/19182/19177/19167/66979/12448/59029/66413/19184/21402/23997/26445/19192/19166/19181/26428/19170/19173/17463/70247/66997/103554/26443/68612/52717/26429/56438/57296/26440/12447/18393/26442/19185/66671/69957/19179	54
R-MMU-5689603	UCH proteinases	40/1964	96/8828	1.4561e-05	0.000154548	0.000127171	16913/110962/22187/16912/26441/69077/18002/21762/23996/67089/50933/66998/53380/19182/19177/19167/59029/66413/19184/56207/23997/26445/19192/19166/19181/19170/19173/17463/11461/70247/66997/103554/26443/68837/57296/26440/225280/26442/19185/19179	40
R-MMU-3858494	Beta-catenin independent WNT signaling	48/1964	123/8828	1.77871e-05	0.000186939	0.000153825	216869/14696/16913/14362/13543/22187/21416/16912/14681/26441/69077/21762/23996/67089/66998/12314/53380/19182/19177/19167/26409/11771/59029/66413/19184/23997/26445/19192/12387/19166/12313/18099/19181/18795/19058/19170/19173/17463/70247/66997/74325/103554/26443/57296/26440/26442/19185/19179	48
R-MMU-71291	Metabolism of amino acids and derivatives	84/1964	251/8828	2.30303e-05	0.000239694	0.000197235	110695/218865/22117/56357/19125/109900/66885/104776/13190/16913/67092/434437/76238/12040/194237/16912/56752/12036/20768/26441/69077/100678/13180/74129/21762/23996/192166/67089/66902/66998/257635/210009/53380/14431/27376/19182/107869/19177/79464/18597/19167/27402/234967/59029/66413/12116/19184/23997/56551/26445/19192/20810/235339/19166/13382/68263/19181/15109/104816/19170/19173/13371/17463/68133/7…	84
R-MMU-5653656	Vesicle-mediated transport	167/1964	568/8828	2.38626e-05	0.000245968	0.000202397	319642/76954/16971/228960/13649/105245/22318/13423/233204/72121/99683/216869/53857/227801/72318/319934/20779/229541/70785/13032/12223/11555/106628/80708/194590/224139/13543/22187/209773/74438/218038/69178/14269/71693/89867/214895/12847/68581/12345/224617/66397/68299/110379/22627/11769/227613/18002/56085/26891/76895/56418/11782/56324/11465/59042/22143/56494/16562/269774/68953/105513/22088/70349/26…	167
R-MMU-5689880	Ub-specific processing proteases	64/1964	181/8828	3.30791e-05	0.000337722	0.000277897	236733/17248/216869/11797/54601/16913/30941/11555/107986/19671/22187/16912/170707/26441/74270/69077/21762/23996/56324/67089/22334/22217/66998/53380/19182/19177/67952/19167/26409/59029/66413/22333/19184/23997/74112/26445/217057/19192/19166/19181/19170/59040/19173/22030/17463/14479/70247/66997/17126/15251/103554/26443/16151/28185/22335/22224/57296/26440/329908/26442/19185/59025/22225/19179	64
R-MMU-5688426	Deubiquitination	82/1964	246/8828	3.37526e-05	0.000341347	0.000280881	236733/17248/216869/11797/54601/231130/16913/30941/11555/107986/19671/110962/22187/57783/16912/170707/26441/74270/69077/18002/21762/23996/269523/56324/67089/50933/192656/12534/22334/22217/66998/53380/19182/19359/19177/67952/19167/22031/26409/76630/59029/66413/22333/19184/56207/23997/74112/26445/217057/19192/19166/19181/19358/19170/73162/59040/19173/22030/17463/11461/14479/70247/66997/17126/15251/…	82
R-MMU-5683057	MAPK family signaling cascades	86/1964	262/8828	4.14933e-05	0.000415708	0.00034207	13649/14587/16195/70686/11600/216869/233046/231474/14173/54153/76089/13385/20779/16913/384783/16367/107971/12223/22371/19417/20416/18595/22187/16912/16194/545156/16185/83379/26441/69077/21762/19052/225849/23996/67089/12534/11465/66998/12314/53380/26395/19182/19177/19167/51792/235072/18612/26931/59029/66413/19184/23997/12540/14083/26445/19192/110157/19166/12313/19181/63953/19170/14164/19173/17463/…	86
R-MMU-5684996	MAPK1/MAPK3 signaling	80/1964	240/8828	4.19386e-05	0.000416279	0.000342539	13649/14587/16195/70686/11600/216869/233046/231474/14173/54153/76089/13385/20779/16913/384783/16367/107971/12223/22371/19417/20416/18595/22187/16912/16194/16185/83379/26441/69077/21762/19052/225849/23996/67089/12534/11465/66998/12314/53380/26395/19182/19177/19167/51792/26931/59029/66413/19184/23997/14083/26445/19192/110157/19166/12313/19181/63953/19170/14164/19173/17463/11461/70247/66997/103554/2…	80
R-MMU-1280218	Adaptive Immune System	187/1964	654/8828	4.71041e-05	0.000463262	0.000381199	387524/75234/77113/242785/21355/19647/22193/68098/83382/74165/17970/99683/23880/53857/80898/27007/211007/19155/71393/18019/20779/14991/223864/94091/16913/13032/142688/83433/19271/16149/21354/218215/69754/230979/83490/15015/208650/66515/233902/79263/217304/269529/229445/15040/65256/20437/14129/22187/231670/16150/17533/19041/16912/217303/20866/68628/81018/69807/30843/230903/12524/76580/67731/76454/…	187
R-MMU-449147	Signaling by Interleukins	86/1964	263/8828	4.84785e-05	0.000472445	0.000388756	22318/16195/14281/12977/231130/16913/384783/16367/12804/13019/20969/20416/93834/22187/50498/16150/12978/16912/20851/16194/11596/16332/16476/56708/16185/12931/26441/69077/21762/19052/23996/16175/67089/56468/192656/16178/71966/66998/53380/19182/18412/19177/54473/19167/51792/26409/59029/66413/108960/19184/21402/18036/23997/26445/19192/26399/93765/102626/19166/69721/19181/16179/19170/19173/17463/7024…	86
R-MMU-163200	Respiratory electron transport, ATP synthesis by chemiosmotic coupling, and heat production by uncoupling proteins.	34/1964	82/8828	7.05114e-05	0.000680975	0.000560347	11957/66377/17993/66495/66108/26940/68342/68194/76947/66916/11949/227197/11947/407785/76916/67876/68493/66046/595136/78330/27425/66841/22229/68375/68349/230075/28080/67273/70316/66414/72900/69487/228033/11946	34
R-MMU-917977	Transferrin endocytosis and recycling	17/1964	31/8828	7.74385e-05	0.000741197	0.000609901	66237/27060/74051/11973/54411/15216/66144/108664/66290/11975/73834/11964/11974/11972/114143/66335/11966	17
R-MMU-5673001	RAF/MAP kinase cascade	77/1964	234/8828	9.41532e-05	0.000885502	0.000728644	13649/14587/70686/11600/216869/233046/231474/14173/54153/76089/13385/20779/16913/384783/16367/107971/12223/22371/19417/20416/18595/22187/16912/16185/83379/26441/69077/21762/19052/225849/23996/67089/11465/66998/12314/53380/26395/19182/19177/19167/51792/26931/59029/66413/19184/23997/14083/26445/19192/110157/19166/12313/19181/63953/19170/14164/19173/17463/11461/70247/66997/103554/26443/56705/16706/1…	77
R-MMU-2467813	Separation of Sister Chromatids	63/1964	183/8828	9.41672e-05	0.000885502	0.000728644	53857/16913/22187/16912/26441/69077/68999/110379/227613/21762/19052/225849/23996/67089/22143/75430/66998/53380/22142/19387/19182/19177/19167/51792/56430/13589/16563/12237/26931/59029/66413/19184/235661/23997/26445/19192/19166/19181/76707/19170/19173/17463/70247/52696/66997/103554/68097/26443/72124/83815/22151/68612/226849/52717/19053/57296/26440/66442/26442/19185/69957/18472/19179	63
R-MMU-1632852	Macroautophagy	36/1964	90/8828	0.000106773	0.000995315	0.000819004	54636/20779/97287/22187/51897/108097/223696/72542/68953/105513/11793/18412/67952/56717/66700/68441/66096/22333/66795/93739/66508/11520/12995/52639/108079/68097/28185/78610/68576/245860/67841/83409/54170/67526/68512/19744	36
R-MMU-9612973	Autophagy	43/1964	114/8828	0.000120935	0.0011176	0.000919631	54636/18541/20779/97287/22187/51897/13627/108097/223696/72542/68953/105513/22088/11793/18412/15516/67952/56717/66700/68441/66096/22333/66795/52348/93739/66508/11520/22352/12995/52639/108079/68097/67123/28185/78610/68576/245860/67841/83409/54170/67526/68512/19744	43
R-MMU-5358351	Signaling by Hedgehog	49/1964	135/8828	0.000129019	0.00118212	0.000972718	214240/216869/14451/16913/22187/16912/26441/69077/227613/21762/23996/269523/67089/22143/66998/53380/22142/19182/19177/19167/59029/66413/19184/21402/23997/26445/19192/19166/19181/19170/19173/17463/70247/66997/103554/18747/271639/18453/26443/22151/22158/56637/224129/56438/57296/26440/26442/19185/19179	49
R-MMU-611105	Respiratory electron transport	26/1964	59/8828	0.000150357	0.00136596	0.00112399	66377/17993/66495/66108/26940/68342/68194/76947/66916/227197/407785/76916/67876/68493/66046/595136/78330/66841/68375/68349/230075/67273/70316/66414/72900/69487	26
R-MMU-77387	Insulin receptor recycling	15/1964	27/8828	0.000169042	0.0015228	0.00125305	66237/27060/11973/54411/66144/108664/66290/11975/73834/11964/11974/11972/114143/66335/11966	15
R-MMU-390471	Association of TriC/CCT with target proteins during biosynthesis	8/1964	10/8828	0.00017228	0.00153903	0.00126641	12461/12466/12468/12462/21454/12469/12464/12465	8
R-MMU-71387	Metabolism of carbohydrates	84/1964	266/8828	0.000224776	0.0019914	0.00163864	110094/13179/68631/74551/217119/73068/14042/77590/17423/18682/14635/74637/76969/20442/57370/15587/20544/20969/19139/328779/50785/18295/54613/13807/14447/13808/212032/74577/20443/56857/54710/18141/59031/18641/110379/74185/110095/269941/77559/102093/56421/12314/26877/13004/27376/14381/14433/14751/17449/21991/18746/121021/18648/232449/27029/21881/56386/66646/212898/12313/17448/231042/74246/15530/694…	84
R-MMU-6799198	Complex I biogenesis	24/1964	54/8828	0.000228264	0.00200573	0.00165043	66377/17993/66495/66108/26940/68342/68194/76947/66916/227197/407785/76916/68493/66046/595136/78330/68375/68349/230075/67273/70316/66414/72900/69487	24
R-MMU-9607240	FLT3 Signaling	79/1964	248/8828	0.000251966	0.00219599	0.001807	13649/18576/14587/70686/11600/216869/233046/231474/14173/54153/76089/13385/20779/16913/384783/16367/107971/12223/22371/19417/20416/18595/22187/16912/16185/83379/26441/69077/21762/19052/225849/23996/67089/11465/66998/12314/53380/26395/19182/19177/19167/51792/26931/59029/66413/19184/23997/14083/26445/75778/19192/110157/19166/12313/19181/63953/19170/14164/19173/17463/11461/70247/66997/103554/26443/5…	79
R-MMU-68882	Mitotic Anaphase	64/1964	193/8828	0.000280436	0.00242441	0.00199495	53857/16913/22187/16912/26441/69077/68999/110379/227613/21762/19052/225849/23996/67089/23825/22143/75430/66998/53380/22142/19387/19182/19177/19167/51792/56430/13589/16563/12237/26931/59029/66413/19184/235661/23997/26445/19192/19166/19181/76707/19170/19173/17463/70247/52696/66997/103554/68097/26443/72124/83815/22151/68612/226849/52717/19053/57296/26440/66442/26442/19185/69957/18472/19179	64
R-MMU-6807878	COPI-mediated anterograde transport	36/1964	94/8828	0.000297456	0.00255099	0.0020991	53857/224139/12847/68581/12345/227613/56418/59042/22143/56494/70349/99412/22142/54161/66676/108123/54130/13136/235661/56041/59288/50797/213827/12068/56334/11840/12343/11843/18195/56444/108124/67542/68097/56447/22151/74498	36
R-MMU-2555396	Mitotic Metaphase and Anaphase	64/1964	194/8828	0.000329399	0.00280251	0.00230607	53857/16913/22187/16912/26441/69077/68999/110379/227613/21762/19052/225849/23996/67089/23825/22143/75430/66998/53380/22142/19387/19182/19177/19167/51792/56430/13589/16563/12237/26931/59029/66413/19184/235661/23997/26445/19192/19166/19181/76707/19170/19173/17463/70247/52696/66997/103554/68097/26443/72124/83815/22151/68612/226849/52717/19053/57296/26440/66442/26442/19185/69957/18472/19179	64
R-MMU-917937	Iron uptake and transport	24/1964	56/8828	0.000444088	0.00374853	0.00308451	11428/66237/22187/53945/27060/74051/11973/18002/54411/15216/66144/108664/66290/21402/11975/73834/11964/11974/52466/11972/114143/66335/11966/18174	24
R-MMU-166166	MyD88-independent TLR4 cascade	34/1964	89/8828	0.000457016	0.00377465	0.00310601	14281/54131/11797/231130/12475/22187/16150/11596/54123/16476/19052/192656/71966/56550/14082/51792/22031/26409/108960/21402/18036/26399/93765/102626/69721/16179/11820/17164/72349/16151/26398/20208/19053/21353	34
R-MMU-937061	TRIF(TICAM1)-mediated TLR4 signaling	34/1964	89/8828	0.000457016	0.00377465	0.00310601	14281/54131/11797/231130/12475/22187/16150/11596/54123/16476/19052/192656/71966/56550/14082/51792/22031/26409/108960/21402/18036/26399/93765/102626/69721/16179/11820/17164/72349/16151/26398/20208/19053/21353	34
R-MMU-168164	Toll Like Receptor 3 (TLR3) Cascade	28/1964	69/8828	0.000457747	0.00377465	0.00310601	14281/54131/231130/22187/16150/11596/54123/16476/19052/192656/71966/51792/26409/108960/21402/18036/26399/93765/102626/69721/16179/11820/17164/72349/16151/26398/20208/19053	28
R-MMU-9006925	Intracellular signaling by second messengers	79/1964	255/8828	0.000653886	0.00535088	0.00440302	13649/18574/19646/14173/54601/20779/16913/384783/16367/12223/244650/23942/83490/18573/18595/12576/22187/16912/12524/83379/12575/26441/69077/21762/19052/225849/23996/67089/12151/66998/12314/53380/19182/19177/56717/19167/51792/26931/59029/66413/68441/66096/19184/23997/117150/26445/75778/19192/19166/12313/19181/17192/66508/16179/19170/14164/73162/19173/17463/12995/70247/66997/103554/18747/26443/2277…	79
R-MMU-71406	Pyruvate metabolism and Citric Acid (TCA) cycle	22/1964	51/8828	0.000682206	0.00554034	0.00455892	16832/18604/20917/18597/170718/27402/14651/20916/22333/235339/13382/68263/17448/66925/67834/12974/16828/17436/66052/228026/14874/20501	22
R-MMU-168142	Toll Like Receptor 10 (TLR10) Cascade	28/1964	71/8828	0.000787885	0.00625622	0.00514799	14281/231130/93834/22187/16150/11596/16476/19052/192656/71966/26940/51792/26409/108960/21402/18036/26399/93765/102626/69721/16179/11820/17164/72349/16151/26398/20208/19053	28
R-MMU-168176	Toll Like Receptor 5 (TLR5) Cascade	28/1964	71/8828	0.000787885	0.00625622	0.00514799	14281/231130/93834/22187/16150/11596/16476/19052/192656/71966/26940/51792/26409/108960/21402/18036/26399/93765/102626/69721/16179/11820/17164/72349/16151/26398/20208/19053	28
R-MMU-975871	MyD88 cascade initiated on plasma membrane	28/1964	71/8828	0.000787885	0.00625622	0.00514799	14281/231130/93834/22187/16150/11596/16476/19052/192656/71966/26940/51792/26409/108960/21402/18036/26399/93765/102626/69721/16179/11820/17164/72349/16151/26398/20208/19053	28
R-MMU-1222556	ROS and RNS production in phagocytes	17/1964	36/8828	0.000793699	0.00625622	0.00514799	17970/66237/18173/27060/11973/66144/108664/66290/11975/73834/74096/11964/11974/11972/114143/66335/11966	17
R-MMU-1257604	PIP3 activates AKT signaling	72/1964	230/8828	0.000807662	0.00631981	0.00520031	13649/19646/14173/54601/20779/16913/384783/16367/12223/244650/23942/83490/18595/12576/22187/16912/12524/83379/12575/26441/69077/21762/19052/225849/23996/67089/12151/66998/53380/19182/19177/56717/19167/51792/26931/59029/66413/68441/66096/19184/23997/117150/26445/75778/19192/19166/19181/17192/66508/16179/19170/14164/73162/19173/17463/12995/70247/66997/103554/26443/227743/68576/226849/83409/54170/19…	72
R-MMU-166058	MyD88:MAL(TIRAP) cascade initiated on plasma membrane	28/1964	72/8828	0.00101988	0.00775398	0.00638044	14281/231130/93834/22187/16150/11596/16476/19052/192656/71966/26940/51792/26409/108960/21402/18036/26399/93765/102626/69721/16179/11820/17164/72349/16151/26398/20208/19053	28
R-MMU-168179	Toll Like Receptor TLR1:TLR2 Cascade	28/1964	72/8828	0.00101988	0.00775398	0.00638044	14281/231130/93834/22187/16150/11596/16476/19052/192656/71966/26940/51792/26409/108960/21402/18036/26399/93765/102626/69721/16179/11820/17164/72349/16151/26398/20208/19053	28
R-MMU-168188	Toll Like Receptor TLR6:TLR2 Cascade	28/1964	72/8828	0.00101988	0.00775398	0.00638044	14281/231130/93834/22187/16150/11596/16476/19052/192656/71966/26940/51792/26409/108960/21402/18036/26399/93765/102626/69721/16179/11820/17164/72349/16151/26398/20208/19053	28
R-MMU-181438	Toll Like Receptor 2 (TLR2) Cascade	28/1964	72/8828	0.00101988	0.00775398	0.00638044	14281/231130/93834/22187/16150/11596/16476/19052/192656/71966/26940/51792/26409/108960/21402/18036/26399/93765/102626/69721/16179/11820/17164/72349/16151/26398/20208/19053	28
R-MMU-70268	Pyruvate metabolism	14/1964	28/8828	0.00113668	0.00858112	0.00706106	16832/18604/18597/27402/14651/22333/235339/13382/68263/16828/17436/228026/14874/20501	14
R-MMU-5673000	RAF activation	15/1964	31/8828	0.00117219	0.0087873	0.00723071	20779/19052/225849/12314/26395/51792/26931/110157/12313/16706/15461/226849/17169/19053/18673	15
R-MMU-8978868	Fatty acid metabolism	55/1964	169/8828	0.00120015	0.00893445	0.00735179	76267/269823/16993/54486/13850/13076/171282/74522/13078/13479/14775/71854/71985/15488/20250/12686/13117/106529/330260/71519/14104/108097/13119/20249/73724/74205/12896/68041/107476/75778/96979/67528/170439/11370/111175/74121/64292/108079/56348/17164/17001/13167/67460/20524/104112/231086/264895/109136/110821/97212/14081/70316/54325/13358/21835	55
R-MMU-1280215	Cytokine Signaling in Immune system	147/1964	532/8828	0.00152362	0.0112643	0.00926893	13649/18576/14587/22318/16195/24014/70686/11600/216869/14281/233046/231474/54131/12977/14173/54153/11797/76089/13385/20779/231130/16913/384783/16367/107971/12223/12804/22371/19417/13019/230979/20969/20416/18595/93834/19043/22187/50498/16150/12978/21934/16912/20851/16194/21940/11596/16332/56469/16476/56708/16185/83379/12931/26441/69077/21762/19052/225849/22192/23996/16175/13690/67089/56468/192656/…	147
R-MMU-166016	Toll Like Receptor 4 (TLR4) Cascade	37/1964	105/8828	0.00154024	0.0113092	0.00930586	14281/54131/11797/231130/93834/12475/22187/16150/11596/54123/16476/19052/192656/71966/56550/26940/14082/51792/22031/26409/108960/21402/18036/26399/93765/102626/69721/16179/11820/17164/72349/16151/26398/16803/20208/19053/21353	37
R-MMU-189451	Heme biosynthesis	7/1964	10/8828	0.00168464	0.0122853	0.0101091	17025/11656/19044/22276/226139/70383/15288	7
R-MMU-3000157	Laminin interactions	13/1964	26/8828	0.00170382	0.0123412	0.0101551	192897/16772/237759/16777/16773/18074/16403/12822/12827/18073/15530/12826/16412	13
R-MMU-70263	Gluconeogenesis	16/1964	35/8828	0.00173057	0.0124508	0.0102453	74551/13807/14447/13808/56857/27376/14433/14751/17449/21991/18648/17448/13806/11674/18655/13358	16
R-MMU-445989	TAK1 activates NFkB by phosphorylation and activation of IKKs complex	14/1964	29/8828	0.0017521	0.0125217	0.0103036	22187/16150/11596/192656/71966/26409/108960/18036/93765/69721/16179/11820/16151/20208	14
R-MMU-168181	Toll Like Receptor 7/8 (TLR7/8) Cascade	30/1964	82/8828	0.0021442	0.0151223	0.0124435	14281/231130/93834/12475/22187/16150/11596/54123/16476/19052/192656/71966/26940/51792/26409/108960/21402/18036/26399/93765/102626/69721/16179/11820/17164/72349/16151/26398/20208/19053	30
R-MMU-975155	MyD88 dependent cascade initiated on endosome	30/1964	82/8828	0.0021442	0.0151223	0.0124435	14281/231130/93834/12475/22187/16150/11596/54123/16476/19052/192656/71966/26940/51792/26409/108960/21402/18036/26399/93765/102626/69721/16179/11820/17164/72349/16151/26398/20208/19053	30
R-MMU-69481	G2/M Checkpoints	52/1964	163/8828	0.00260512	0.0182403	0.0150092	16913/231724/12566/22187/27223/16912/26441/69077/22627/21762/23996/29870/67089/12534/66998/53380/12544/19182/19177/19167/12649/59029/66413/19184/23997/19356/27354/22218/26445/19192/93765/19166/19181/19367/225182/26428/19170/19173/17463/70247/66997/103554/27214/26443/26429/57296/26440/18393/26442/19185/22630/19179	52
R-MMU-8866652	Synthesis of active ubiquitin: roles of E1 and E2 enzymes	14/1964	30/8828	0.00262034	0.0182403	0.0150092	22193/22187/22195/50933/22201/56550/22209/216150/53323/22210/68612/22213/66799/22225	14
R-MMU-196299	Beta-catenin phosphorylation cascade	9/1964	16/8828	0.00321415	0.0222295	0.0182918	19052/225849/51792/26931/12387/72345/226849/56637/19053	9
R-MMU-556833	Metabolism of lipids	161/1964	600/8828	0.00347991	0.0239132	0.0196772	76267/13106/269823/15446/15484/20466/70750/269180/16993/54486/14421/77582/106861/13850/241447/18010/13076/171282/74522/68393/97287/67260/215456/101502/19062/17977/107650/20397/109135/13078/18806/18782/69769/13479/14775/101540/74577/114664/71854/66826/71985/16332/114874/69772/81535/104086/22196/67512/15488/20250/105387/319554/12686/84095/237928/208715/13117/106529/330260/19384/71519/14104/14555/14…	161
R-MMU-8953854	Metabolism of RNA	149/1964	551/8828	0.00355752	0.0242908	0.0199879	51796/74320/83486/228140/75705/103677/71713/75956/16913/269061/103135/232791/53817/16549/22187/74737/19655/77134/20637/22695/16912/54196/353190/15511/27373/26441/18141/69077/22121/66878/66583/110379/21762/19052/23996/218343/213773/67089/17975/56422/54633/67197/66998/110816/66231/225348/53380/433702/19182/20005/19177/66249/19167/51792/67678/386612/67897/16898/50911/67332/208643/66877/231889/54364/…	149
R-MMU-975138	TRAF6 mediated induction of NFkB and MAP kinases upon TLR7/8 or 9 activation	29/1964	81/8828	0.00364137	0.0246951	0.0203206	14281/231130/93834/12475/22187/16150/11596/16476/19052/192656/71966/26940/51792/26409/108960/21402/18036/26399/93765/102626/69721/16179/11820/17164/72349/16151/26398/20208/19053	29
R-MMU-5694530	Cargo concentration in the ER	15/1964	34/8828	0.00366279	0.0246951	0.0203206	99683/13032/214895/68581/66397/56494/70361/193813/14067/20334/56334/69608/12793/20333/338366	15
R-MMU-3299685	Detoxification of Reactive Oxygen Species	14/1964	31/8828	0.00381294	0.0255467	0.0210214	17970/22166/14775/14778/20656/26462/11757/66401/56551/21672/11758/18453/18477/54683	14
R-MMU-69620	Cell Cycle Checkpoints	82/1964	282/8828	0.00390632	0.0260098	0.0214024	17248/16913/231724/12576/12566/22187/27223/16912/12575/26441/69077/68999/110379/22627/21762/19052/225849/23996/29870/67089/12534/75430/66998/53380/12544/19387/19182/19177/19167/51792/56430/12649/13589/16563/12237/12448/26931/59029/66413/19184/235661/23997/19356/27354/22218/26445/19192/93765/19166/19181/19367/76707/225182/26428/19170/19173/17463/70247/52696/66997/103554/68097/27214/26443/72124/838…	82
R-MMU-8856688	Golgi-to-ER retrograde transport	41/1964	126/8828	0.00477029	0.0315663	0.0259747	53857/12847/68581/12345/227613/76895/59042/22143/16562/70349/22142/54161/66676/16564/16563/108123/54130/224630/53357/71116/16561/235661/59288/50797/213827/16565/56334/11840/12343/11843/18195/56444/20333/108124/68097/14423/56447/22151/18475/16573/18472	41
R-MMU-168138	Toll Like Receptor 9 (TLR9) Cascade	30/1964	86/8828	0.00486255	0.0319795	0.0263146	14281/231130/93834/12475/22187/16150/11596/54123/16476/19052/192656/71966/26940/51792/26409/108960/21402/18036/26399/93765/102626/69721/16179/11820/17164/72349/16151/26398/20208/19053	30
R-MMU-6798695	Neutrophil degranulation	141/1964	524/8828	0.00545694	0.0356697	0.0293512	319642/22177/12796/105245/628900/18733/19152/16993/83382/19204/12512/76025/18792/12267/241633/18010/56620/19261/216445/232801/14991/227753/14127/13032/232413/19271/18173/17025/15015/18436/12475/102595/15040/74012/63986/16480/212032/20527/16970/16790/12273/19074/56615/14190/18636/50701/100561/15511/69537/15951/12514/70152/105855/27060/11537/56485/268373/76577/67512/69077/12461/18641/208795/227613/…	141
R-MMU-6811442	Intra-Golgi and retrograde Golgi-to-ER traffic	55/1964	180/8828	0.00556862	0.0361791	0.0297703	319642/228960/53857/72318/12847/68581/12345/68299/227613/76895/56418/59042/22143/56494/16562/70349/22142/232286/54161/66676/16564/16563/108123/54130/224630/53357/71116/16561/235661/59288/50797/213827/16565/56334/11840/104303/12343/11843/18195/56444/20333/108124/67542/17113/68097/14423/56447/22151/18475/16573/227746/56367/22319/22365/18472	55
R-MMU-389661	Glyoxylate metabolism and glycine degradation	13/1964	29/8828	0.00566788	0.0366022	0.0301185	434437/76238/12040/79464/18597/27402/235339/13382/68263/68133/70503/212647/70316	13
R-MMU-166208	mTORC1-mediated signalling	11/1964	23/8828	0.00592366	0.0380249	0.0312892	75705/56717/208643/68441/66096/13684/66508/68576/83409/54170/19744	11
R-MMU-382551	Transport of small molecules	172/1964	656/8828	0.00700573	0.0447032	0.0367845	65973/54403/27360/67972/214663/20499/20536/101488/11428/22260/63873/241633/331004/18821/170755/117591/110891/76184/66237/12724/72401/14696/16913/20538/12346/26457/24060/20503/18173/20512/20544/20516/57776/72961/24059/22187/11826/20527/16912/53945/18400/100561/20502/27060/57780/74051/63959/97086/226999/330836/225579/53881/11732/26441/66397/171504/246049/69077/212555/67547/11973/231549/18002/21762/…	172
R-MMU-75105	Fatty acyl-CoA biosynthesis	14/1964	33/8828	0.00750713	0.0476192	0.0391839	74522/20250/12686/106529/14104/20249/74205/107476/170439/56348/104112/14081/54325/13358	14

## Sheet: Fig3Bii_ReactomePA_gKO_DE_genes
ID	Description	GeneRatio	BgRatio	pvalue	p.adjust	qvalue	geneID	Count
R-MMU-1430728	Metabolism	508/508	1730/8828	0	0	0	76267/13106/269823/109857/110094/15446/59027/15484/20466/12350/70750/110695/269180/16971/13107/13179/218865/16832/22117/16993/75475/68631/56357/19125/54486/74551/14421/77582/109900/217119/51793/106861/73068/13850/104158/14042/66447/66885/671535/241447/77590/18010/18799/13076/17423/14696/104776/56045/171282/18682/14635/22166/223864/13190/74522/74637/68393/16913/18604/76969/21452/67092/97287/67260/…	508
R-MMU-556833	Metabolism of lipids	161/508	600/8828	5.9032e-70	1.73849e-67	1.09054e-67	76267/13106/269823/15446/15484/20466/70750/269180/16993/54486/14421/77582/106861/13850/241447/18010/13076/171282/74522/68393/97287/67260/215456/101502/19062/17977/107650/20397/109135/13078/18806/18782/69769/13479/14775/101540/74577/114664/71854/66826/71985/16332/114874/69772/81535/104086/22196/67512/15488/20250/105387/319554/12686/84095/237928/208715/13117/106529/330260/19384/71519/14104/14555/14…	161
R-MMU-71291	Metabolism of amino acids and derivatives	84/508	251/8828	2.96228e-43	5.81594e-41	3.64828e-41	110695/218865/22117/56357/19125/109900/66885/104776/13190/16913/67092/434437/76238/12040/194237/16912/56752/12036/20768/26441/69077/100678/13180/74129/21762/23996/192166/67089/66902/66998/257635/210009/53380/14431/27376/19182/107869/19177/79464/18597/19167/27402/234967/59029/66413/12116/19184/23997/56551/26445/19192/20810/235339/19166/13382/68263/19181/15109/104816/19170/19173/13371/17463/68133/7…	84
R-MMU-71387	Metabolism of carbohydrates	84/508	266/8828	5.0191e-41	7.39063e-39	4.63607e-39	110094/13179/68631/74551/217119/73068/14042/77590/17423/18682/14635/74637/76969/20442/57370/15587/20544/20969/19139/328779/50785/18295/54613/13807/14447/13808/212032/74577/20443/56857/54710/18141/59031/18641/110379/74185/110095/269941/77559/102093/56421/12314/26877/13004/27376/14381/14433/14751/17449/21991/18746/121021/18648/232449/27029/21881/56386/66646/212898/12313/17448/231042/74246/15530/694…	84
R-MMU-1428517	The citric acid (TCA) cycle and respiratory electron transport	56/508	133/8828	4.82621e-35	5.68528e-33	3.56632e-33	16832/18604/20917/11957/66377/17993/66495/66108/26940/18597/68342/170718/68194/27402/14651/20916/76947/66916/22333/11949/227197/11947/407785/235339/13382/68263/17448/66925/67834/76916/12974/67876/68493/16828/66046/17436/595136/78330/27425/66841/66052/228026/22229/14874/68375/68349/230075/28080/67273/70316/66414/72900/69487/228033/20501/11946	56
R-MMU-350562	Regulation of ornithine decarboxylase (ODC)	33/508	51/8828	4.6687e-29	4.58311e-27	2.87494e-27	16913/16912/26441/69077/21762/23996/67089/66998/53380/19182/19177/19167/59029/66413/19184/23997/26445/19192/19166/19181/19170/19173/17463/70247/66997/103554/54375/26443/57296/26440/26442/19185/19179	33
R-MMU-1236978	Cross-presentation of soluble exogenous antigens (endosomes)	32/508	49/8828	2.11886e-28	1.78287e-26	1.11838e-26	16913/16912/26441/69077/21762/23996/67089/66998/53380/19182/19177/19167/59029/66413/19184/23997/26445/19192/19166/19181/19170/19173/17463/70247/66997/103554/26443/57296/26440/26442/19185/19179	32
R-MMU-8978868	Fatty acid metabolism	55/508	169/8828	1.21947e-27	8.97838e-26	5.63205e-26	76267/269823/16993/54486/13850/13076/171282/74522/13078/13479/14775/71854/71985/15488/20250/12686/13117/106529/330260/71519/14104/108097/13119/20249/73724/74205/12896/68041/107476/75778/96979/67528/170439/11370/111175/74121/64292/108079/56348/17164/17001/13167/67460/20524/104112/231086/264895/109136/110821/97212/14081/70316/54325/13358/21835	55
R-MMU-75815	Ubiquitin-dependent degradation of Cyclin D	32/508	51/8828	1.41823e-27	9.28156e-26	5.82223e-26	16913/16912/26441/69077/21762/23996/67089/66998/53380/19182/19177/19167/59029/66413/19184/23997/26445/19192/19166/19181/19170/19173/17463/70247/66997/103554/26443/57296/26440/26442/19185/19179	32
R-MMU-349425	Autodegradation of the E3 ubiquitin ligase COP1	32/508	52/8828	3.4937e-27	1.58291e-25	9.92946e-26	16913/16912/26441/69077/21762/23996/67089/66998/53380/19182/19177/19167/59029/66413/19184/23997/26445/19192/19166/19181/19170/19173/17463/70247/66997/103554/26443/57296/26440/26442/19185/19179	32
R-MMU-69601	Ubiquitin Mediated Degradation of Phosphorylated Cdc25A	32/508	52/8828	3.4937e-27	1.58291e-25	9.92946e-26	16913/16912/26441/69077/21762/23996/67089/66998/53380/19182/19177/19167/59029/66413/19184/23997/26445/19192/19166/19181/19170/19173/17463/70247/66997/103554/26443/57296/26440/26442/19185/19179	32
R-MMU-69610	p53-Independent DNA Damage Response	32/508	52/8828	3.4937e-27	1.58291e-25	9.92946e-26	16913/16912/26441/69077/21762/23996/67089/66998/53380/19182/19177/19167/59029/66413/19184/23997/26445/19192/19166/19181/19170/19173/17463/70247/66997/103554/26443/57296/26440/26442/19185/19179	32
R-MMU-69613	p53-Independent G1/S DNA damage checkpoint	32/508	52/8828	3.4937e-27	1.58291e-25	9.92946e-26	16913/16912/26441/69077/21762/23996/67089/66998/53380/19182/19177/19167/59029/66413/19184/23997/26445/19192/19166/19181/19170/19173/17463/70247/66997/103554/26443/57296/26440/26442/19185/19179	32
R-MMU-351202	Metabolism of polyamines	34/508	60/8828	4.10947e-27	1.72891e-25	1.08453e-25	16913/16912/26441/69077/21762/23996/67089/66998/53380/19182/19177/19167/59029/66413/19184/23997/26445/19192/20810/19166/19181/19170/19173/17463/70247/66997/103554/54375/26443/57296/26440/26442/19185/19179	34
R-MMU-5610785	GLI3 is processed to GLI3R by the proteasome	33/508	57/8828	9.1085e-27	3.5766e-25	2.24357e-25	16913/16912/26441/69077/21762/23996/67089/66998/53380/19182/19177/19167/59029/66413/19184/23997/26445/19192/19166/19181/19170/19173/17463/70247/66997/103554/18747/26443/57296/26440/26442/19185/19179	33
R-MMU-4641257	Degradation of AXIN	32/508	55/8828	4.40182e-26	1.5251e-24	9.5668e-25	16913/16912/26441/69077/21762/23996/67089/66998/53380/19182/19177/19167/59029/66413/19184/23997/26445/19192/19166/19181/19170/19173/17463/70247/66997/103554/26443/57296/26440/26442/19185/19179	32
R-MMU-8854050	FBXL7 down-regulates AURKA during mitotic entry and in early mitosis	32/508	55/8828	4.40182e-26	1.5251e-24	9.5668e-25	16913/16912/26441/69077/21762/23996/67089/66998/53380/19182/19177/19167/59029/66413/19184/23997/26445/19192/19166/19181/19170/19173/17463/70247/66997/103554/26443/57296/26440/26442/19185/19179	32
R-MMU-8939902	Regulation of RUNX2 expression and activity	31/508	52/8828	9.29187e-26	2.72938e-24	1.71211e-24	16913/16912/26441/69077/21762/23996/67089/66998/53380/19182/19177/19167/59029/66413/19184/23997/26445/19192/19166/19181/19170/19173/17463/70247/66997/26443/57296/26440/26442/19185/19179	31
R-MMU-450408	AUF1 (hnRNP D0) binds and destabilizes mRNA	32/508	56/8828	9.73122e-26	2.72938e-24	1.71211e-24	16913/16912/26441/69077/21762/23996/67089/66998/53380/19182/19177/19167/59029/66413/19184/23997/26445/19192/19166/19181/19170/19173/17463/70247/66997/103554/26443/57296/26440/26442/19185/19179	32
R-MMU-5610780	Degradation of GLI1 by the proteasome	32/508	56/8828	9.73122e-26	2.72938e-24	1.71211e-24	16913/16912/26441/69077/21762/23996/67089/66998/53380/19182/19177/19167/59029/66413/19184/23997/26445/19192/19166/19181/19170/19173/17463/70247/66997/103554/26443/57296/26440/26442/19185/19179	32
R-MMU-69541	Stabilization of p53	32/508	56/8828	9.73122e-26	2.72938e-24	1.71211e-24	16913/16912/26441/69077/21762/23996/67089/66998/53380/19182/19177/19167/59029/66413/19184/23997/26445/19192/19166/19181/19170/19173/17463/70247/66997/103554/26443/57296/26440/26442/19185/19179	32
R-MMU-196854	Metabolism of vitamins and cofactors	55/508	183/8828	1.09193e-25	2.9234e-24	1.83382e-24	59027/16971/671535/21452/11761/328417/20969/170752/547253/20527/239393/11433/20509/17769/105387/14104/67283/14187/71883/108156/75735/12314/210009/109129/56075/27384/116852/107476/230027/106564/107747/19662/77697/12313/67287/15530/52466/14735/216134/67096/80285/72621/11813/109136/110821/54219/17252/26363/71743/67618/15926/14733/67795/15529/11808	55
R-MMU-4641258	Degradation of DVL	32/508	57/8828	2.10213e-25	4.80438e-24	3.01374e-24	16913/16912/26441/69077/21762/23996/67089/66998/53380/19182/19177/19167/59029/66413/19184/23997/26445/19192/19166/19181/19170/19173/17463/70247/66997/103554/26443/57296/26440/26442/19185/19179	32
R-MMU-5607761	Dectin-1 mediated noncanonical NF-kB signaling	32/508	57/8828	2.10213e-25	4.80438e-24	3.01374e-24	16913/16912/26441/69077/21762/23996/67089/66998/53380/19182/19177/19167/59029/66413/19184/23997/26445/19192/19166/19181/19170/19173/17463/70247/66997/103554/26443/57296/26440/26442/19185/19179	32
R-MMU-5676590	NIK-->noncanonical NF-kB signaling	32/508	57/8828	2.10213e-25	4.80438e-24	3.01374e-24	16913/16912/26441/69077/21762/23996/67089/66998/53380/19182/19177/19167/59029/66413/19184/23997/26445/19192/19166/19181/19170/19173/17463/70247/66997/103554/26443/57296/26440/26442/19185/19179	32
R-MMU-8941858	Regulation of RUNX3 expression and activity	31/508	53/8828	2.12078e-25	4.80438e-24	3.01374e-24	16913/16912/26441/69077/21762/23996/67089/66998/53380/19182/19177/19167/59029/66413/19184/23997/26445/19192/19166/19181/19170/19173/17463/70247/66997/26443/57296/26440/26442/19185/19179	31
R-MMU-68827	CDT1 association with the CDC6:ORC:origin complex	32/508	58/8828	4.44294e-25	9.69218e-24	6.07981e-24	16913/16912/26441/69077/21762/23996/67089/66998/53380/19182/19177/19167/59029/66413/19184/23997/26445/19192/19166/19181/19170/19173/17463/70247/66997/103554/26443/57296/26440/26442/19185/19179	32
R-MMU-4608870	Asymmetric localization of PCP proteins	32/508	62/8828	7.28727e-24	1.48007e-22	9.28432e-23	16913/16912/26441/69077/21762/23996/67089/66998/53380/19182/19177/19167/59029/66413/19184/23997/26445/19192/19166/19181/19170/19173/17463/70247/66997/103554/26443/57296/26440/26442/19185/19179	32
R-MMU-5358346	Hedgehog ligand biogenesis	32/508	62/8828	7.28727e-24	1.48007e-22	9.28432e-23	16913/16912/26441/69077/21762/23996/67089/66998/53380/19182/19177/19167/59029/66413/19184/23997/26445/19192/19166/19181/19170/19173/17463/70247/66997/103554/26443/57296/26440/26442/19185/19179	32
R-MMU-1169091	Activation of NF-kappaB in B cells	32/508	63/8828	1.40311e-23	2.75478e-22	1.72805e-22	16913/16912/26441/69077/21762/23996/67089/66998/53380/19182/19177/19167/59029/66413/19184/23997/26445/19192/19166/19181/19170/19173/17463/70247/66997/103554/26443/57296/26440/26442/19185/19179	32
R-MMU-8948751	Regulation of PTEN stability and activity	33/508	68/8828	1.84906e-23	3.51321e-22	2.2038e-22	16913/16912/26441/69077/21762/23996/67089/66998/53380/19182/19177/19167/59029/66413/19184/23997/26445/19192/19166/19181/19170/19173/17463/12995/70247/66997/103554/26443/57296/26440/26442/19185/19179	33
R-MMU-69563	p53-Dependent G1 DNA Damage Response	32/508	64/8828	2.65871e-23	4.7454e-22	2.97674e-22	16913/16912/26441/69077/21762/23996/67089/66998/53380/19182/19177/19167/59029/66413/19184/23997/26445/19192/19166/19181/19170/19173/17463/70247/66997/103554/26443/57296/26440/26442/19185/19179	32
R-MMU-69580	p53-Dependent G1/S DNA damage checkpoint	32/508	64/8828	2.65871e-23	4.7454e-22	2.97674e-22	16913/16912/26441/69077/21762/23996/67089/66998/53380/19182/19177/19167/59029/66413/19184/23997/26445/19192/19166/19181/19170/19173/17463/70247/66997/103554/26443/57296/26440/26442/19185/19179	32
R-MMU-187577	SCF(Skp2)-mediated degradation of p27/p21	31/508	60/8828	3.5951e-23	6.22798e-22	3.90675e-22	16913/16912/26441/69077/21762/23996/67089/66998/53380/19182/19177/19167/59029/66413/19184/23997/26445/19192/19166/19181/19170/19173/17463/70247/66997/26443/57296/26440/26442/19185/19179	31
R-MMU-1168372	Downstream signaling events of B Cell Receptor (BCR)	34/508	74/8828	3.79711e-23	6.39e-22	4.00838e-22	16913/16912/26441/69077/21762/23996/67089/66998/12314/53380/19182/19177/19167/59029/66413/19184/23997/26445/19192/19166/12313/19181/19170/19173/17463/70247/66997/103554/26443/57296/26440/26442/19185/19179	34
R-MMU-1234176	Oxygen-dependent proline hydroxylation of Hypoxia-inducible Factor Alpha	32/508	66/8828	9.1249e-23	1.45259e-21	9.11192e-22	16913/16912/26441/69077/21762/23996/67089/66998/53380/19182/19177/19167/59029/66413/19184/23997/26445/19192/19166/19181/19170/19173/17463/70247/66997/103554/26443/57296/26440/26442/19185/19179	32
R-MMU-69615	G1/S DNA Damage Checkpoints	32/508	66/8828	9.1249e-23	1.45259e-21	9.11192e-22	16913/16912/26441/69077/21762/23996/67089/66998/53380/19182/19177/19167/59029/66413/19184/23997/26445/19192/19166/19181/19170/19173/17463/70247/66997/103554/26443/57296/26440/26442/19185/19179	32
R-MMU-174154	APC/C:Cdc20 mediated degradation of Securin	32/508	67/8828	1.65493e-22	2.37744e-21	1.49135e-21	16913/16912/26441/69077/21762/23996/67089/66998/53380/19182/19177/19167/59029/66413/19184/23997/26445/19192/19166/19181/19170/19173/17463/70247/66997/103554/26443/57296/26440/26442/19185/19179	32
R-MMU-5658442	Regulation of RAS by GAPs	32/508	67/8828	1.65493e-22	2.37744e-21	1.49135e-21	16913/16912/26441/69077/21762/23996/67089/66998/53380/19182/19177/19167/59029/66413/19184/23997/26445/19192/19166/19181/19170/19173/17463/70247/66997/103554/26443/57296/26440/26442/19185/19179	32
R-MMU-68867	Assembly of the pre-replicative complex	32/508	67/8828	1.65493e-22	2.37744e-21	1.49135e-21	16913/16912/26441/69077/21762/23996/67089/66998/53380/19182/19177/19167/59029/66413/19184/23997/26445/19192/19166/19181/19170/19173/17463/70247/66997/103554/26443/57296/26440/26442/19185/19179	32
R-MMU-8939236	RUNX1 regulates transcription of genes involved in differentiation of HSCs	32/508	67/8828	1.65493e-22	2.37744e-21	1.49135e-21	16913/16912/26441/69077/21762/23996/67089/66998/53380/19182/19177/19167/59029/66413/19184/23997/26445/19192/19166/19181/19170/19173/17463/70247/66997/103554/26443/57296/26440/26442/19185/19179	32
R-MMU-5687128	MAPK6/MAPK4 signaling	33/508	72/8828	1.86377e-22	2.61371e-21	1.63955e-21	16913/16912/26441/69077/21762/23996/67089/66998/53380/19182/19177/19167/59029/66413/19184/23997/26445/19192/19166/19181/19170/19173/17463/70247/66997/103554/18747/26443/57296/26440/26442/19185/19179	33
R-MMU-174084	Autodegradation of Cdh1 by Cdh1:APC/C	31/508	63/8828	2.4475e-22	3.27632e-21	2.0552e-21	16913/16912/26441/69077/21762/23996/67089/66998/53380/19182/19177/19167/59029/66413/19184/23997/26445/19192/19166/19181/19170/19173/17463/70247/66997/26443/57296/26440/26442/19185/19179	31
R-MMU-8878166	Transcriptional regulation by RUNX2	31/508	63/8828	2.4475e-22	3.27632e-21	2.0552e-21	16913/16912/26441/69077/21762/23996/67089/66998/53380/19182/19177/19167/59029/66413/19184/23997/26445/19192/19166/19181/19170/19173/17463/70247/66997/26443/57296/26440/26442/19185/19179	31
R-MMU-1234174	Cellular response to hypoxia	32/508	70/8828	9.13214e-22	1.16845e-20	7.32955e-21	16913/16912/26441/69077/21762/23996/67089/66998/53380/19182/19177/19167/59029/66413/19184/23997/26445/19192/19166/19181/19170/19173/17463/70247/66997/103554/26443/57296/26440/26442/19185/19179	32
R-MMU-68949	Orc1 removal from chromatin	32/508	70/8828	9.13214e-22	1.16845e-20	7.32955e-21	16913/16912/26441/69077/21762/23996/67089/66998/53380/19182/19177/19167/59029/66413/19184/23997/26445/19192/19166/19181/19170/19173/17463/70247/66997/103554/26443/57296/26440/26442/19185/19179	32
R-MMU-8852276	The role of GTSE1 in G2/M progression after G2 checkpoint	33/508	75/8828	9.32377e-22	1.16845e-20	7.32955e-21	16913/16912/26441/69077/21762/23996/67089/66998/53380/19182/19177/15516/19167/59029/66413/19184/23997/26445/19192/19166/19181/19170/19173/17463/70247/66997/103554/26443/57296/26440/26442/19185/19179	33
R-MMU-163200	Respiratory electron transport, ATP synthesis by chemiosmotic coupling, and heat production by uncoupling proteins.	34/508	82/8828	2.32966e-21	2.85869e-20	1.79323e-20	11957/66377/17993/66495/66108/26940/68342/68194/76947/66916/11949/227197/11947/407785/76916/67876/68493/66046/595136/78330/27425/66841/22229/68375/68349/230075/28080/67273/70316/66414/72900/69487/228033/11946	34
R-MMU-174178	APC/C:Cdh1 mediated degradation of Cdc20 and other APC/C:Cdh1 targeted proteins in late mitosis/early G1	32/508	72/8828	2.68606e-21	3.10214e-20	1.94594e-20	16913/16912/26441/69077/21762/23996/67089/66998/53380/19182/19177/19167/59029/66413/19184/23997/26445/19192/19166/19181/19170/19173/17463/70247/66997/103554/26443/57296/26440/26442/19185/19179	32
R-MMU-174184	Cdc20:Phospho-APC/C mediated degradation of Cyclin A	32/508	72/8828	2.68606e-21	3.10214e-20	1.94594e-20	16913/16912/26441/69077/21762/23996/67089/66998/53380/19182/19177/19167/59029/66413/19184/23997/26445/19192/19166/19181/19170/19173/17463/70247/66997/103554/26443/57296/26440/26442/19185/19179	32
R-MMU-69017	CDK-mediated phosphorylation and removal of Cdc6	32/508	72/8828	2.68606e-21	3.10214e-20	1.94594e-20	16913/16912/26441/69077/21762/23996/67089/66998/53380/19182/19177/19167/59029/66413/19184/23997/26445/19192/19166/19181/19170/19173/17463/70247/66997/103554/26443/57296/26440/26442/19185/19179	32
R-MMU-179419	APC:Cdc20 mediated degradation of cell cycle proteins prior to satisfation of the cell cycle checkpoint	32/508	73/8828	4.53097e-21	5.03537e-20	3.15863e-20	16913/16912/26441/69077/21762/23996/67089/66998/53380/19182/19177/19167/59029/66413/19184/23997/26445/19192/19166/19181/19170/19173/17463/70247/66997/103554/26443/57296/26440/26442/19185/19179	32
R-MMU-2871837	FCERI mediated NF-kB activation	32/508	73/8828	4.53097e-21	5.03537e-20	3.15863e-20	16913/16912/26441/69077/21762/23996/67089/66998/53380/19182/19177/19167/59029/66413/19184/23997/26445/19192/19166/19181/19170/19173/17463/70247/66997/103554/26443/57296/26440/26442/19185/19179	32
R-MMU-176409	APC/C:Cdc20 mediated degradation of mitotic proteins	32/508	75/8828	1.24979e-20	1.36319e-19	8.55118e-20	16913/16912/26441/69077/21762/23996/67089/66998/53380/19182/19177/19167/59029/66413/19184/23997/26445/19192/19166/19181/19170/19173/17463/70247/66997/103554/26443/57296/26440/26442/19185/19179	32
R-MMU-69202	Cyclin E associated events during G1/S transition	31/508	70/8828	1.30657e-20	1.39921e-19	8.77712e-20	16913/16912/26441/69077/21762/23996/67089/66998/53380/19182/19177/19167/59029/66413/19184/23997/26445/19192/19166/19181/19170/19173/17463/70247/66997/26443/57296/26440/26442/19185/19179	31
R-MMU-5607764	CLEC7A (Dectin-1) signaling	34/508	86/8828	1.47268e-20	1.54894e-19	9.71636e-20	16913/16912/26441/69077/21762/23996/67089/66998/12314/53380/19182/19177/19167/59029/66413/19184/23997/26445/19192/19166/12313/19181/19170/19173/17463/70247/66997/103554/26443/57296/26440/26442/19185/19179	34
R-MMU-176814	Activation of APC/C and APC/C:Cdc20 mediated degradation of mitotic proteins	32/508	76/8828	2.04517e-20	2.11335e-19	1.32568e-19	16913/16912/26441/69077/21762/23996/67089/66998/53380/19182/19177/19167/59029/66413/19184/23997/26445/19192/19166/19181/19170/19173/17463/70247/66997/103554/26443/57296/26440/26442/19185/19179	32
R-MMU-69656	Cyclin A:Cdk2-associated events at S phase entry	31/508	72/8828	3.6552e-20	3.71192e-19	2.32845e-19	16913/16912/26441/69077/21762/23996/67089/66998/53380/19182/19177/19167/59029/66413/19184/23997/26445/19192/19166/19181/19170/19173/17463/70247/66997/26443/57296/26440/26442/19185/19179	31
R-MMU-195253	Degradation of beta-catenin by the destruction complex	32/508	78/8828	5.32608e-20	5.31705e-19	3.33533e-19	16913/16912/26441/69077/21762/23996/67089/66998/53380/19182/19177/19167/59029/66413/19184/23997/26445/19192/19166/19181/19170/19173/17463/70247/66997/103554/26443/57296/26440/26442/19185/19179	32
R-MMU-450531	Regulation of mRNA stability by proteins that bind AU-rich elements	33/508	86/8828	1.65228e-19	1.62199e-18	1.01746e-18	16913/16912/26441/69077/21762/23996/67089/66998/53380/19182/19177/19167/59029/66413/19184/23997/26445/19192/19166/19181/19170/19173/17463/70247/66997/103554/17164/26443/57296/26440/26442/19185/19179	33
R-MMU-5632684	Hedgehog 'on' state	32/508	82/8828	3.25858e-19	3.09565e-18	1.94187e-18	16913/16912/26441/69077/21762/23996/67089/66998/53380/19182/19177/19167/59029/66413/19184/23997/26445/19192/19166/19181/19170/19173/17463/70247/66997/103554/26443/57296/26440/26442/19185/19179	32
R-MMU-69002	DNA Replication Pre-Initiation	32/508	82/8828	3.25858e-19	3.09565e-18	1.94187e-18	16913/16912/26441/69077/21762/23996/67089/66998/53380/19182/19177/19167/59029/66413/19184/23997/26445/19192/19166/19181/19170/19173/17463/70247/66997/103554/26443/57296/26440/26442/19185/19179	32
R-MMU-174143	APC/C-mediated degradation of cell cycle proteins	32/508	83/8828	5.02412e-19	4.55263e-18	2.85582e-18	16913/16912/26441/69077/21762/23996/67089/66998/53380/19182/19177/19167/59029/66413/19184/23997/26445/19192/19166/19181/19170/19173/17463/70247/66997/103554/26443/57296/26440/26442/19185/19179	32
R-MMU-202424	Downstream TCR signaling	32/508	83/8828	5.02412e-19	4.55263e-18	2.85582e-18	16913/16912/26441/69077/21762/23996/67089/66998/53380/19182/19177/19167/59029/66413/19184/23997/26445/19192/19166/19181/19170/19173/17463/70247/66997/103554/26443/57296/26440/26442/19185/19179	32
R-MMU-453276	Regulation of mitotic cell cycle	32/508	83/8828	5.02412e-19	4.55263e-18	2.85582e-18	16913/16912/26441/69077/21762/23996/67089/66998/53380/19182/19177/19167/59029/66413/19184/23997/26445/19192/19166/19181/19170/19173/17463/70247/66997/103554/26443/57296/26440/26442/19185/19179	32
R-MMU-8878159	Transcriptional regulation by RUNX3	31/508	78/8828	6.32062e-19	5.64067e-18	3.53834e-18	16913/16912/26441/69077/21762/23996/67089/66998/53380/19182/19177/19167/59029/66413/19184/23997/26445/19192/19166/19181/19170/19173/17463/70247/66997/26443/57296/26440/26442/19185/19179	31
R-MMU-5621481	C-type lectin receptors (CLRs)	35/508	103/8828	1.27631e-18	1.12201e-17	7.03827e-18	16913/16912/26441/69077/21762/23996/67089/66998/12314/53380/19182/19177/19167/59029/66413/19184/23997/26445/19192/19166/12313/19181/19170/19173/17463/70247/66997/103554/18747/26443/57296/26440/26442/19185/19179	35
R-MMU-4086400	PCP/CE pathway	32/508	86/8828	1.76259e-18	1.52671e-17	9.5769e-18	16913/16912/26441/69077/21762/23996/67089/66998/53380/19182/19177/19167/59029/66413/19184/23997/26445/19192/19166/19181/19170/19173/17463/70247/66997/103554/26443/57296/26440/26442/19185/19179	32
R-MMU-211859	Biological oxidations	49/508	203/8828	1.80249e-18	1.53865e-17	9.65178e-18	13106/109857/13107/75475/54486/104158/66447/13076/14261/17977/13078/272428/14871/13479/109731/71854/56615/232087/14872/11669/104086/14863/26876/60525/13117/14630/71519/57344/18976/13119/210009/15516/29859/223337/213012/110175/13121/22017/17161/66427/23827/13122/14874/58810/13885/12846/394435/66112/18105	49
R-MMU-983705	Signaling by the B Cell Receptor (BCR)	34/508	98/8828	1.90597e-18	1.60374e-17	1.00601e-17	16913/16912/26441/69077/21762/23996/67089/66998/12314/53380/19182/19177/19167/59029/66413/19184/23997/26445/19192/19166/12313/19181/19170/19173/17463/70247/66997/103554/26443/57296/26440/26442/19185/19179	34
R-MMU-69052	Switching of origins to a post-replicative state	32/508	89/8828	5.81664e-18	4.77602e-17	2.99595e-17	16913/16912/26441/69077/21762/23996/67089/66998/53380/19182/19177/19167/59029/66413/19184/23997/26445/19192/19166/19181/19170/19173/17463/70247/66997/103554/26443/57296/26440/26442/19185/19179	32
R-MMU-8957322	Metabolism of steroids	38/508	127/8828	5.83826e-18	4.77602e-17	2.99595e-17	15484/101502/17977/114664/104086/22196/15488/105387/319554/208715/19384/14187/13360/18976/18194/67861/17855/170460/20775/27384/16211/110460/116852/170459/68603/13121/13595/15490/192156/56348/270669/11677/16987/73166/13122/235293/74754/110196	38
R-MMU-5610787	Hedgehog 'off' state	34/508	104/8828	1.59528e-17	1.28715e-16	8.07417e-17	16913/16912/26441/69077/21762/23996/67089/66998/53380/19182/19177/19167/59029/66413/19184/23997/26445/19192/19166/19181/19170/19173/17463/70247/66997/103554/18747/26443/224129/57296/26440/26442/19185/19179	34
R-MMU-611105	Respiratory electron transport	26/508	59/8828	2.06238e-17	1.64155e-16	1.02972e-16	66377/17993/66495/66108/26940/68342/68194/76947/66916/227197/407785/76916/67876/68493/66046/595136/78330/66841/68375/68349/230075/67273/70316/66414/72900/69487	26
R-MMU-1236975	Antigen processing-Cross presentation	32/508	93/8828	2.62134e-17	2.05863e-16	1.29135e-16	16913/16912/26441/69077/21762/23996/67089/66998/53380/19182/19177/19167/59029/66413/19184/23997/26445/19192/19166/19181/19170/19173/17463/70247/66997/103554/26443/57296/26440/26442/19185/19179	32
R-MMU-5689603	UCH proteinases	32/508	96/8828	7.64302e-17	5.84641e-16	3.6674e-16	16913/16912/26441/69077/21762/23996/67089/66998/53380/19182/19177/19167/59029/66413/19184/23997/26445/19192/19166/19181/19170/19173/17463/70247/66997/103554/26443/57296/26440/26442/19185/19179	32
R-MMU-9020702	Interleukin-1 signaling	32/508	96/8828	7.64302e-17	5.84641e-16	3.6674e-16	16913/16912/26441/69077/21762/23996/67089/66998/53380/19182/19177/19167/59029/66413/19184/23997/26445/19192/19166/19181/19170/19173/17463/70247/66997/103554/26443/57296/26440/26442/19185/19179	32
R-MMU-3858494	Beta-catenin independent WNT signaling	36/508	123/8828	9.9218e-17	7.49223e-16	4.6998e-16	14696/16913/16912/26441/69077/21762/23996/67089/66998/12314/53380/19182/19177/19167/59029/66413/19184/23997/26445/19192/19166/12313/19181/18795/19170/19173/17463/70247/66997/103554/26443/57296/26440/26442/19185/19179	36
R-MMU-5668541	TNFR2 non-canonical NF-kB pathway	32/508	97/8828	1.08052e-16	8.05601e-16	5.05345e-16	16913/16912/26441/69077/21762/23996/67089/66998/53380/19182/19177/19167/59029/66413/19184/23997/26445/19192/19166/19181/19170/19173/17463/70247/66997/103554/26443/57296/26440/26442/19185/19179	32
R-MMU-6799198	Complex I biogenesis	24/508	54/8828	2.84648e-16	2.09572e-15	1.31463e-15	66377/17993/66495/66108/26940/68342/68194/76947/66916/227197/407785/76916/68493/66046/595136/78330/68375/68349/230075/67273/70316/66414/72900/69487	24
R-MMU-202403	TCR signaling	32/508	100/8828	2.96403e-16	2.12904e-15	1.33553e-15	16913/16912/26441/69077/21762/23996/67089/66998/53380/19182/19177/19167/59029/66413/19184/23997/26445/19192/19166/19181/19170/19173/17463/70247/66997/103554/26443/57296/26440/26442/19185/19179	32
R-MMU-382556	ABC-family proteins mediated transport	32/508	100/8828	2.96403e-16	2.12904e-15	1.33553e-15	16913/16912/26441/69077/21762/23996/67089/66998/53380/19182/19177/19167/59029/66413/19184/23997/26445/19192/19166/19181/19170/19173/17463/70247/66997/103554/26443/57296/26440/26442/19185/19179	32
R-MMU-2454202	Fc epsilon receptor (FCERI) signaling	34/508	115/8828	5.16739e-16	3.66698e-15	2.30026e-15	16913/16912/26441/69077/21762/23996/67089/66998/12314/53380/19182/19177/19167/59029/66413/19184/23997/26445/19192/19166/12313/19181/19170/19173/17463/70247/66997/103554/26443/57296/26440/26442/19185/19179	34
R-MMU-191273	Cholesterol biosynthesis	17/508	26/8828	1.23792e-15	8.6802e-15	5.445e-15	319554/208715/13360/18194/17855/20775/110460/68603/13121/13595/15490/192156/16987/73166/235293/74754/110196	17
R-MMU-15869	Metabolism of nucleotides	31/508	98/8828	1.26413e-15	8.75971e-15	5.49488e-15	56045/22166/68556/27369/75686/14775/11565/55936/11637/15452/51797/75894/214254/108147/53893/20135/12497/22171/67054/66588/13178/56520/11534/18102/103850/17766/80914/14544/14450/93692/105446	31
R-MMU-6807070	PTEN Regulation	33/508	112/8828	1.57841e-15	1.08103e-14	6.78119e-15	16913/16912/26441/69077/21762/23996/67089/66998/53380/19182/19177/19167/59029/66413/19184/23997/26445/19192/19166/19181/19170/19173/17463/12995/70247/66997/103554/26443/57296/26440/26442/19185/19179	33
R-MMU-446652	Interleukin-1 family signaling	32/508	108/8828	3.5893e-15	2.43e-14	1.52431e-14	16913/16912/26441/69077/21762/23996/67089/66998/53380/19182/19177/19167/59029/66413/19184/23997/26445/19192/19166/19181/19170/19173/17463/70247/66997/103554/26443/57296/26440/26442/19185/19179	32
R-MMU-69206	G1/S Transition	31/508	103/8828	6.03345e-15	4.0383e-14	2.53318e-14	16913/16912/26441/69077/21762/23996/67089/66998/53380/19182/19177/19167/59029/66413/19184/23997/26445/19192/19166/19181/19170/19173/17463/70247/66997/26443/57296/26440/26442/19185/19179	31
R-MMU-196849	Metabolism of water-soluble vitamins and cofactors	33/508	118/8828	8.59625e-15	5.68898e-14	3.56864e-14	59027/671535/21452/11761/328417/547253/20527/11433/20509/17769/14104/67283/108156/75735/210009/109129/107476/106564/107747/77697/67287/52466/216134/67096/80285/72621/109136/110821/54219/26363/71743/67618/67795	33
R-MMU-1483257	Phospholipid metabolism	42/508	188/8828	1.06159e-14	6.94754e-14	4.35812e-14	269180/77582/106861/97287/215456/19062/107650/109135/18806/18782/69769/66826/16332/114874/67512/84095/237928/14555/14792/234729/68671/67073/18618/53357/271457/117150/26970/19679/11840/83493/52123/12995/79196/245532/192654/212862/226856/231086/97212/14712/67800/219135	42
R-MMU-71406	Pyruvate metabolism and Citric Acid (TCA) cycle	22/508	51/8828	1.09994e-14	7.1194e-14	4.46593e-14	16832/18604/20917/18597/170718/27402/14651/20916/22333/235339/13382/68263/17448/66925/67834/12974/16828/17436/66052/228026/14874/20501	22
R-MMU-1630316	Glycosaminoglycan metabolism	33/508	120/8828	1.4724e-14	9.42656e-14	5.91318e-14	13179/217119/14042/77590/17423/76969/20442/57370/15587/20544/20969/328779/50785/18295/54613/74577/20443/54710/59031/269941/13004/121021/27029/56386/212898/15530/20441/14735/218271/72727/56398/14733/15529	33
R-MMU-70326	Glucose metabolism	27/508	81/8828	2.10841e-14	1.33532e-13	8.37635e-14	74551/13807/14447/13808/212032/56857/18141/18641/110379/56421/27376/14433/14751/17449/21991/18746/18648/17448/231042/69482/13806/11674/72141/231103/72124/18655/13358	27
R-MMU-69239	Synthesis of DNA	32/508	115/8828	2.59307e-14	1.62481e-13	1.01923e-13	16913/16912/26441/69077/21762/23996/67089/66998/53380/19182/19177/19167/59029/66413/19184/23997/26445/19192/19166/19181/19170/19173/17463/70247/66997/103554/26443/57296/26440/26442/19185/19179	32
R-MMU-5358351	Signaling by Hedgehog	34/508	135/8828	9.9127e-14	6.14587e-13	3.85524e-13	16913/16912/26441/69077/21762/23996/67089/66998/53380/19182/19177/19167/59029/66413/19184/23997/26445/19192/19166/19181/19170/19173/17463/70247/66997/103554/18747/26443/224129/57296/26440/26442/19185/19179	34
R-MMU-69306	DNA Replication	32/508	123/8828	2.03761e-13	1.25016e-12	7.84212e-13	16913/16912/26441/69077/21762/23996/67089/66998/53380/19182/19177/19167/59029/66413/19184/23997/26445/19192/19166/19181/19170/19173/17463/70247/66997/103554/26443/57296/26440/26442/19185/19179	32
R-MMU-453279	Mitotic G1-G1/S phases	31/508	126/8828	2.46436e-12	1.4964e-11	9.38677e-12	16913/16912/26441/69077/21762/23996/67089/66998/53380/19182/19177/19167/59029/66413/19184/23997/26445/19192/19166/19181/19170/19173/17463/70247/66997/26443/57296/26440/26442/19185/19179	31
R-MMU-70171	Glycolysis	21/508	62/8828	1.22521e-11	7.36376e-11	4.61921e-11	13807/14447/13808/212032/18141/18641/110379/56421/14433/14751/21991/18746/18648/231042/69482/13806/11674/72141/231103/72124/18655	21
R-MMU-69242	S Phase	32/508	142/8828	1.37504e-11	8.1808e-11	5.13173e-11	16913/16912/26441/69077/21762/23996/67089/66998/53380/19182/19177/19167/59029/66413/19184/23997/26445/19192/19166/19181/19170/19173/17463/70247/66997/103554/26443/57296/26440/26442/19185/19179	32
R-MMU-70263	Gluconeogenesis	16/508	35/8828	1.68175e-11	9.9055e-11	6.21362e-11	74551/13807/14447/13808/56857/27376/14433/14751/17449/21991/18648/17448/13806/11674/18655/13358	16
R-MMU-70268	Pyruvate metabolism	14/508	28/8828	6.96581e-11	4.06224e-10	2.5482e-10	16832/18604/18597/27402/14651/22333/235339/13382/68263/16828/17436/228026/14874/20501	14
R-MMU-1483206	Glycerophospholipid biosynthesis	27/508	115/8828	2.09356e-10	1.20893e-09	7.58348e-10	77582/106861/215456/18806/18782/66826/114874/67512/237928/14555/14792/68671/18618/53357/26970/19679/52123/12995/79196/245532/192654/212862/226856/231086/97212/14712/67800	27
R-MMU-1638091	Heparan sulfate/heparin (HS-GAG) metabolism	18/508	52/8828	2.43696e-10	1.39356e-09	8.74166e-10	13179/217119/14042/17423/20969/328779/50785/74577/54710/13004/121021/27029/15530/14735/218271/72727/14733/15529	18
R-MMU-69275	G2/M Transition	34/508	179/8828	4.4456e-10	2.51775e-09	1.57936e-09	16913/16912/26441/69077/21762/23996/67089/66998/53380/19182/19177/15516/19167/59029/66413/19184/23997/26445/19192/19166/19181/19170/19173/17463/70247/66997/103554/18747/26443/57296/26440/26442/19185/19179	34
R-MMU-453274	Mitotic G2-G2/M phases	34/508	181/8828	6.05525e-10	3.38006e-09	2.12028e-09	16913/16912/26441/69077/21762/23996/67089/66998/53380/19182/19177/15516/19167/59029/66413/19184/23997/26445/19192/19166/19181/19170/19173/17463/70247/66997/103554/18747/26443/57296/26440/26442/19185/19179	34
R-MMU-156580	Phase II - Conjugation of compounds	23/508	89/8828	6.13356e-10	3.38006e-09	2.12028e-09	75475/54486/66447/272428/14871/56615/232087/14872/14863/14630/57344/210009/29859/223337/213012/110175/22017/23827/14874/58810/13885/12846/394435	23
R-MMU-69481	G2/M Checkpoints	32/508	163/8828	6.14034e-10	3.38006e-09	2.12028e-09	16913/16912/26441/69077/21762/23996/67089/66998/53380/19182/19177/19167/59029/66413/19184/23997/26445/19192/19166/19181/19170/19173/17463/70247/66997/103554/26443/57296/26440/26442/19185/19179	32
R-MMU-2467813	Separation of Sister Chromatids	34/508	183/8828	8.20586e-10	4.47523e-09	2.80727e-09	16913/16912/26441/69077/110379/21762/23996/67089/66998/53380/19182/19177/19167/59029/66413/19184/23997/26445/19192/19166/19181/19170/19173/17463/70247/66997/103554/26443/72124/57296/26440/26442/19185/19179	34
R-MMU-75105	Fatty acyl-CoA biosynthesis	14/508	33/8828	1.08756e-09	5.87682e-09	3.68647e-09	74522/20250/12686/106529/14104/20249/74205/107476/170439/56348/104112/14081/54325/13358	14
R-MMU-389661	Glyoxylate metabolism and glycine degradation	13/508	29/8828	1.89093e-09	1.01251e-08	6.35135e-09	434437/76238/12040/79464/18597/27402/235339/13382/68263/68133/70503/212647/70316	13
R-MMU-1483249	Inositol phosphate metabolism	16/508	46/8828	2.27141e-09	1.20528e-08	7.56058e-09	269180/18799/27399/228550/104759/16332/217837/327655/12314/212111/12313/18795/17330/269615/56409/71207	16
R-MMU-5689880	Ub-specific processing proteases	33/508	181/8828	2.42265e-09	1.27406e-08	7.99202e-09	16913/16912/26441/69077/21762/23996/67089/66998/53380/19182/19177/19167/59029/66413/22333/19184/23997/26445/19192/19166/19181/19170/19173/17463/70247/66997/103554/26443/57296/26440/26442/19185/19179	33
R-MMU-975634	Retinoid metabolism and transport	16/508	47/8828	3.26334e-09	1.70098e-08	1.06701e-08	16971/20969/170752/239393/105387/14187/27384/116852/19662/15530/14735/11813/17252/14733/15529/11808	16
R-MMU-68882	Mitotic Anaphase	34/508	193/8828	3.48931e-09	1.80281e-08	1.13088e-08	16913/16912/26441/69077/110379/21762/23996/67089/66998/53380/19182/19177/19167/59029/66413/19184/23997/26445/19192/19166/19181/19170/19173/17463/70247/66997/103554/26443/72124/57296/26440/26442/19185/19179	34
R-MMU-2555396	Mitotic Metaphase and Anaphase	34/508	194/8828	4.00748e-09	2.05253e-08	1.28753e-08	16913/16912/26441/69077/110379/21762/23996/67089/66998/53380/19182/19177/19167/59029/66413/19184/23997/26445/19192/19166/19181/19170/19173/17463/70247/66997/103554/26443/72124/57296/26440/26442/19185/19179	34
R-MMU-8878171	Transcriptional regulation by RUNX1	34/508	196/8828	5.26888e-09	2.67532e-08	1.6782e-08	20466/16913/16912/26441/69077/21762/23996/67089/66998/53380/19182/19177/19167/59029/66413/19184/23997/26445/19192/19166/19181/19170/19173/17463/12995/70247/66997/103554/26443/57296/26440/26442/19185/19179	34
R-MMU-211945	Phase I - Functionalization of compounds	24/508	108/8828	6.98771e-09	3.51774e-08	2.20664e-08	13106/109857/13107/104158/13076/14261/17977/13078/109731/11669/104086/26876/60525/13117/71519/18976/13119/15516/13121/17161/66427/13122/66112/18105	24
R-MMU-2142753	Arachidonic acid metabolism	17/508	57/8828	1.03862e-08	5.18432e-08	3.25207e-08	269823/16993/54486/13850/13076/13078/13479/14775/71854/13117/330260/71519/13119/96979/64292/17164/17001	17
R-MMU-6806667	Metabolism of fat-soluble vitamins	16/508	51/8828	1.25599e-08	6.21663e-08	3.89963e-08	16971/20969/170752/239393/105387/14187/27384/116852/19662/15530/14735/11813/17252/14733/15529/11808	16
R-MMU-9006925	Intracellular signaling by second messengers	39/508	255/8828	1.55285e-08	7.62192e-08	4.78115e-08	16913/16912/26441/69077/21762/23996/67089/66998/12314/53380/19182/19177/19167/59029/66413/19184/23997/117150/26445/75778/19192/19166/12313/19181/19170/19173/17463/12995/70247/66997/103554/18747/26443/224129/57296/26440/26442/19185/19179	39
R-MMU-1793185	Chondroitin sulfate/dermatan sulfate metabolism	15/508	48/8828	3.82681e-08	1.8628e-07	1.16852e-07	13179/217119/77590/20969/59031/269941/13004/121021/212898/15530/14735/218271/72727/14733/15529	15
R-MMU-1971475	A tetrasaccharide linker sequence is required for GAG synthesis	11/508	25/8828	4.3904e-08	2.11963e-07	1.32962e-07	13179/217119/20969/13004/121021/15530/14735/218271/72727/14733/15529	11
R-MMU-156590	Glutathione conjugation	12/508	31/8828	5.98264e-08	2.86486e-07	1.7971e-07	75475/54486/66447/14871/56615/14872/14863/14630/110175/14874/58810/13885	12
R-MMU-1257604	PIP3 activates AKT signaling	35/508	230/8828	9.90003e-08	4.70251e-07	2.94984e-07	16913/16912/26441/69077/21762/23996/67089/66998/53380/19182/19177/19167/59029/66413/19184/23997/117150/26445/75778/19192/19166/19181/19170/19173/17463/12995/70247/66997/103554/26443/57296/26440/26442/19185/19179	35
R-MMU-189451	Heme biosynthesis	7/508	10/8828	2.06933e-07	9.7507e-07	6.11652e-07	17025/11656/19044/22276/226139/70383/15288	7
R-MMU-201681	TCF dependent signaling in response to WNT	33/508	218/8828	2.6304e-07	1.22961e-06	7.7132e-07	16913/16912/26441/69077/21762/23996/67089/66998/53380/19182/19177/19167/59029/66413/19184/23997/26445/19192/19166/19181/19170/19173/17463/12995/70247/66997/103554/26443/57296/26440/26442/19185/19179	33
R-MMU-77289	Mitochondrial Fatty Acid Beta-Oxidation	12/508	36/8828	4.07009e-07	1.88763e-06	1.18409e-06	71985/73724/75778/11370/13167/67460/231086/264895/109136/110821/97212/70316	12
R-MMU-5673001	RAF/MAP kinase cascade	34/508	234/8828	4.6642e-07	2.14626e-06	1.34633e-06	16913/16912/26441/69077/21762/23996/67089/66998/12314/53380/19182/19177/19167/59029/66413/19184/23997/26445/19192/19166/12313/19181/19170/19173/17463/70247/66997/103554/26443/57296/26440/26442/19185/19179	34
R-MMU-189445	Metabolism of porphyrins	8/508	15/8828	5.1165e-07	2.30047e-06	1.44306e-06	17025/11656/19044/22276/226139/70383/109778/15288	8
R-MMU-70221	Glycogen breakdown (glycogenolysis)	8/508	15/8828	5.1165e-07	2.30047e-06	1.44306e-06	110094/18682/110095/77559/102093/12314/12313/27357	8
R-MMU-71336	Pentose phosphate pathway	8/508	15/8828	5.1165e-07	2.30047e-06	1.44306e-06	74637/19139/14381/232449/21881/66646/21351/110208	8
R-MMU-8982491	Glycogen metabolism	9/508	20/8828	6.12254e-07	2.73195e-06	1.71372e-06	110094/18682/74185/110095/77559/102093/12314/12313/27357	9
R-MMU-9607240	FLT3 Signaling	35/508	248/8828	6.41357e-07	2.8403e-06	1.78169e-06	16913/16912/26441/69077/21762/23996/67089/66998/12314/53380/19182/19177/19167/59029/66413/19184/23997/26445/75778/19192/19166/12313/19181/19170/19173/17463/70247/66997/103554/26443/57296/26440/26442/19185/19179	35
R-MMU-5684996	MAPK1/MAPK3 signaling	34/508	240/8828	8.51036e-07	3.74075e-06	2.34653e-06	16913/16912/26441/69077/21762/23996/67089/66998/12314/53380/19182/19177/19167/59029/66413/19184/23997/26445/19192/19166/12313/19181/19170/19173/17463/70247/66997/103554/26443/57296/26440/26442/19185/19179	34
R-MMU-8951664	Neddylation	32/508	219/8828	8.99837e-07	3.92595e-06	2.46271e-06	16913/16912/26441/69077/21762/23996/67089/66998/53380/19182/19177/19167/59029/66413/19184/23997/26445/19192/19166/19181/19170/19173/17463/70247/66997/103554/26443/57296/26440/26442/19185/19179	32
R-MMU-449147	Signaling by Interleukins	36/508	263/8828	9.37424e-07	4.05987e-06	2.54672e-06	16913/20969/16912/16332/26441/69077/21762/23996/67089/66998/53380/19182/19177/19167/59029/66413/19184/23997/26445/19192/19166/19181/19170/19173/17463/70247/66997/103554/18747/17164/26443/57296/26440/26442/19185/19179	36
R-MMU-204174	Regulation of pyruvate dehydrogenase (PDH) complex	8/508	16/8828	9.71946e-07	4.17866e-06	2.62123e-06	18604/18597/27402/235339/13382/68263/228026/14874	8
R-MMU-71403	Citric acid cycle (TCA cycle)	9/508	21/8828	1.01716e-06	4.34135e-06	2.72329e-06	20917/170718/20916/13382/17448/66925/67834/12974/66052	9
R-MMU-2187338	Visual phototransduction	19/508	94/8828	1.24722e-06	5.285e-06	3.31523e-06	16971/20969/170752/239393/105387/14187/12314/27384/116852/19662/12313/15530/245532/14735/11813/17252/14733/15529/11808	19
R-MMU-499943	Interconversion of nucleotide di- and triphosphates	10/508	27/8828	1.26388e-06	5.31734e-06	3.33551e-06	22166/55936/11637/51797/20135/22171/66588/56520/18102/93692	10
R-MMU-163685	Integration of energy metabolism	17/508	78/8828	1.50704e-06	6.29535e-06	3.94901e-06	14696/223864/12288/14104/108097/16500/74205/21881/107476/18795/21351/20526/108079/18747/104112/21428/224129	17
R-MMU-5683057	MAPK family signaling cascades	35/508	262/8828	2.36072e-06	9.79201e-06	6.14243e-06	16913/16912/26441/69077/21762/23996/67089/66998/12314/53380/19182/19177/19167/59029/66413/19184/23997/26445/19192/19166/12313/19181/19170/19173/17463/70247/66997/103554/18747/26443/57296/26440/26442/19185/19179	35
R-MMU-428157	Sphingolipid metabolism	17/508	81/8828	2.62676e-06	1.08193e-05	6.78684e-06	70750/14421/241447/18010/67260/20397/101540/74577/81535/67902/66844/52635/30960/14466/13244/56356/208449	17
R-MMU-2022928	HS-GAG biosynthesis	10/508	30/8828	3.84716e-06	1.5736e-05	9.87101e-06	14042/17423/20969/328779/50785/54710/15530/14735/14733/15529	10
R-MMU-5688426	Deubiquitination	33/508	246/8828	4.20682e-06	1.70884e-05	1.07194e-05	16913/16912/26441/69077/21762/23996/67089/66998/53380/19182/19177/19167/59029/66413/22333/19184/23997/26445/19192/19166/19181/19170/19173/17463/70247/66997/103554/26443/57296/26440/26442/19185/19179	33
R-MMU-195721	Signaling by WNT	37/508	295/8828	5.49202e-06	2.21562e-05	1.38983e-05	14696/16913/16912/26441/69077/21762/23996/67089/66998/12314/53380/19182/19177/19167/59029/66413/19184/23997/26445/19192/19166/12313/19181/18795/19170/19173/17463/12995/70247/66997/103554/26443/57296/26440/26442/19185/19179	37
R-MMU-1855204	Synthesis of IP3 and IP4 in the cytosol	9/508	27/8828	1.18792e-05	4.75975e-05	2.98574e-05	18799/228550/104759/16332/217837/12314/12313/18795/269615	9
R-MMU-1483255	PI Metabolism	15/508	74/8828	1.5886e-05	6.32219e-05	3.96584e-05	269180/97287/19062/107650/109135/69769/16332/84095/234729/67073/271457/117150/11840/83493/219135	15
R-MMU-70895	Branched-chain amino acid catabolism	7/508	17/8828	2.35114e-05	9.29409e-05	5.83009e-05	56357/66885/104776/12040/12036/13382/11992	7
R-MMU-69620	Cell Cycle Checkpoints	34/508	282/8828	3.06558e-05	0.000120375	7.55102e-05	16913/16912/26441/69077/110379/21762/23996/67089/66998/53380/19182/19177/19167/59029/66413/19184/23997/26445/19192/19166/19181/19170/19173/17463/70247/66997/103554/26443/72124/57296/26440/26442/19185/19179	34
R-MMU-163210	Formation of ATP by chemiosmotic coupling	7/508	18/8828	3.65758e-05	0.00013997	8.78018e-05	11957/11949/11947/27425/28080/228033/11946	7
R-MMU-193807	Synthesis of bile acids and bile salts via 27-hydroxycholesterol	7/508	18/8828	3.65758e-05	0.00013997	8.78018e-05	101502/17977/104086/105387/27384/116852/13122	7
R-MMU-8949613	Cristae formation	7/508	18/8828	3.65758e-05	0.00013997	8.78018e-05	11957/11949/11947/27425/28080/228033/11946	7
R-MMU-1614635	Sulfur amino acid metabolism	8/508	24/8828	3.68342e-05	0.00013997	8.78018e-05	22117/66902/210009/27376/107869/12116/56551/104923	8
R-MMU-8956321	Nucleotide salvage	8/508	24/8828	3.68342e-05	0.00013997	8.78018e-05	68556/27369/15452/75894/13178/11534/80914/105446	8
R-MMU-199220	Vitamin B5 (pantothenate) metabolism	6/508	13/8828	4.27406e-05	0.000161373	0.000101228	14104/75735/106564/72621/71743/67618	6
R-MMU-197264	Nicotinamide salvaging	7/508	19/8828	5.5058e-05	0.000206555	0.00012957	59027/671535/328417/547253/67287/80285/67795	7
R-MMU-1660499	Synthesis of PIPs at the plasma membrane	11/508	48/8828	6.63454e-05	0.000247326	0.000155145	269180/97287/19062/109135/16332/84095/67073/271457/117150/11840/219135	11
R-MMU-1592230	Mitochondrial biogenesis	8/508	26/8828	7.06313e-05	0.000258773	0.000162326	11957/60525/11949/11947/27425/28080/228033/11946	8
R-MMU-200425	Import of palmitoyl-CoA into the mitochondrial matrix	6/508	14/8828	7.11736e-05	0.000258773	0.000162326	108097/12896/68041/107476/108079/21835	6
R-MMU-74217	Purine salvage	6/508	14/8828	7.11736e-05	0.000258773	0.000162326	27369/15452/75894/13178/11534/105446	6
R-MMU-8978934	Metabolism of cofactors	6/508	14/8828	7.11736e-05	0.000258773	0.000162326	71883/12314/56075/230027/12313/15926	6
R-MMU-1638074	Keratan sulfate/keratin metabolism	9/508	33/8828	7.16682e-05	0.000258973	0.000162451	76969/20442/57370/18295/54613/74577/20443/56386/20441	9
R-MMU-193368	Synthesis of bile acids and bile salts via 7alpha-hydroxycholesterol	8/508	27/8828	9.5369e-05	0.000340439	0.000213554	101502/17977/104086/15488/105387/27384/116852/13122	8
R-MMU-2022854	Keratan sulfate biosynthesis	8/508	27/8828	9.5369e-05	0.000340439	0.000213554	76969/20442/57370/18295/54613/20443/56386/20441	8
R-MMU-1660661	Sphingolipid de novo biosynthesis	10/508	42/8828	0.000100758	0.000355369	0.000222919	70750/241447/67260/20397/101540/81535/66844/30960/13244/208449	10
R-MMU-5362517	Signaling by Retinoic Acid	10/508	42/8828	0.000100758	0.000355369	0.000222919	18604/26876/16592/18597/27402/235339/13382/68263/228026/17252	10
R-MMU-2024096	HS-GAG degradation	7/508	21/8828	0.000114859	0.000402689	0.000252603	20969/74577/27029/15530/14735/14733/15529	7
R-MMU-1855167	Synthesis of pyrophosphates in the cytosol	5/508	10/8828	0.00012244	0.000426727	0.000267682	27399/217837/327655/56409/71207	5
R-MMU-196741	Cobalamin (Cbl, vitamin B12) transport and metabolism	7/508	22/8828	0.000160179	0.000551729	0.000346094	21452/210009/109129/77697/67096/109136/54219	7
R-MMU-75876	Synthesis of very long-chain fatty acyl-CoAs	7/508	22/8828	0.000160179	0.000551729	0.000346094	12686/106529/74205/170439/56348/14081/54325	7
R-MMU-9018677	Biosynthesis of DHA-derived SPMs	6/508	16/8828	0.000171885	0.000588605	0.000369226	13106/15446/16993/13850/13076/17001	6
R-MMU-8956319	Nucleobase catabolism	9/508	37/8828	0.000188076	0.000640329	0.000401672	56045/75686/14775/214254/53893/12497/103850/17766/14544	9
R-MMU-983168	Antigen processing: Ubiquitination & Proteasome degradation	32/508	286/8828	0.000216988	0.000734517	0.000460755	16913/16912/26441/69077/21762/23996/67089/66998/53380/19182/19177/19167/59029/66413/19184/23997/26445/19192/19166/19181/19170/19173/17463/70247/66997/103554/26443/57296/26440/26442/19185/19179	32
R-MMU-8979227	Triglyceride metabolism	7/508	23/8828	0.00021895	0.000736922	0.000462264	68393/215456/16592/75772/12140/233549/67800	7
R-MMU-1483166	Synthesis of PA	9/508	38/8828	0.000234073	0.000783346	0.000491385	215456/18806/18782/114874/67512/14555/26970/52123/14712	9
R-MMU-1660514	Synthesis of PIPs at the Golgi membrane	6/508	17/8828	0.000252816	0.000836564	0.000524768	107650/84095/234729/67073/11840/83493	6
R-MMU-9018678	Biosynthesis of specialized proresolving mediators (SPMs)	6/508	17/8828	0.000252816	0.000836564	0.000524768	13106/15446/16993/13850/13076/17001	6
R-MMU-68886	M Phase	39/508	383/8828	0.000334617	0.00110106	0.000690683	16913/16912/26441/18141/69077/110379/21762/23996/67089/66998/53380/19182/19177/19167/59029/66413/19184/23997/26445/19192/19166/19181/231042/19170/19173/69482/17463/12995/70247/66997/103554/18747/26443/72124/57296/26440/26442/19185/19179	39
R-MMU-2142691	Synthesis of Leukotrienes (LT) and Eoxins (EX)	7/508	25/8828	0.000388234	0.00127039	0.000796901	16993/13479/71854/13117/13119/17164/17001	7
R-MMU-2022870	Chondroitin sulfate biosynthesis	6/508	19/8828	0.00050211	0.00162413	0.0010188	13179/77590/59031/269941/13004/121021	6
R-MMU-74259	Purine catabolism	6/508	19/8828	0.00050211	0.00162413	0.0010188	75686/14775/214254/53893/17766/14544	6
R-MMU-2262752	Cellular responses to stress	42/508	431/8828	0.000504611	0.00162413	0.0010188	22166/16913/14775/16912/26441/18141/69077/110379/21762/23996/67089/66998/53380/19182/19177/15516/19167/59029/66413/19184/23997/56551/26445/19192/19166/19181/231042/19170/19173/69482/17463/70247/66997/103554/17164/26443/72124/57296/26440/26442/19185/19179	42
R-MMU-8953897	Cellular responses to external stimuli	42/508	433/8828	0.000555252	0.00177741	0.00111495	22166/16913/14775/16912/26441/18141/69077/110379/21762/23996/67089/66998/53380/19182/19177/15516/19167/59029/66413/19184/23997/56551/26445/19192/19166/19181/231042/19170/19173/69482/17463/70247/66997/103554/17164/26443/72124/57296/26440/26442/19185/19179	42
R-MMU-211897	Cytochrome P450 - arranged by substrate type	12/508	71/8828	0.000658058	0.00209512	0.00131424	13106/13107/13076/17977/13078/104086/13117/71519/18976/13119/13121/13122	12
R-MMU-194068	Bile acid and bile salt metabolism	9/508	44/8828	0.000747852	0.0023682	0.00148555	101502/17977/104086/15488/105387/170460/27384/116852/13122	9
R-MMU-156581	Methylation	5/508	14/8828	0.000802051	0.00249951	0.00156792	232087/57344/210009/22017/12846	5
R-MMU-2046104	alpha-linolenic (omega3) and linoleic (omega6) acid metabolism	5/508	14/8828	0.000802051	0.00249951	0.00156792	76267/15488/12686/14081/54325	5
R-MMU-2046106	alpha-linolenic acid (ALA) metabolism	5/508	14/8828	0.000802051	0.00249951	0.00156792	76267/15488/12686/14081/54325	5
R-MMU-192105	Synthesis of bile acids and bile salts	8/508	36/8828	0.000821932	0.00254799	0.00159833	101502/17977/104086/15488/105387/27384/116852/13122	8
R-MMU-9037629	Lewis blood group biosynthesis	5/508	15/8828	0.00114664	0.00353596	0.00221807	73068/54613/20443/26877/20441	5
R-MMU-196807	Nicotinate metabolism	7/508	31/8828	0.00157233	0.00482346	0.00302571	59027/671535/328417/547253/67287/80285/67795	7
R-MMU-193775	Synthesis of bile acids and bile salts via 24-hydroxycholesterol	5/508	16/8828	0.0015897	0.00482647	0.0030276	101502/104086/105387/27384/116852	5
R-MMU-9033658	Blood group systems biosynthesis	5/508	16/8828	0.0015897	0.00482647	0.0030276	73068/54613/20443/26877/20441	5
R-MMU-196780	Biotin transport and metabolism	4/508	10/8828	0.0017223	0.00517568	0.00324665	107476/72621/110821/26363	4
R-MMU-2022923	Dermatan sulfate biosynthesis	4/508	10/8828	0.0017223	0.00517568	0.00324665	13179/13004/121021/212898	4
R-MMU-196757	Metabolism of folate and pterines	5/508	17/8828	0.00214674	0.00641843	0.00402621	20509/17769/108156/107747/52466	5
R-MMU-196071	Metabolism of steroid hormones	8/508	42/8828	0.00236591	0.00703799	0.00441486	15484/114664/14187/18976/67861/170459/56348/11677	8
R-MMU-983169	Class I MHC mediated antigen processing & presentation	33/508	345/8828	0.0026816	0.00793701	0.0049788	16913/16912/26441/69077/110379/21762/23996/67089/66998/53380/19182/19177/19167/59029/66413/19184/23997/26445/19192/19166/19181/19170/19173/17463/70247/66997/103554/26443/57296/26440/26442/19185/19179	33
R-MMU-211976	Endogenous sterols	6/508	27/8828	0.00369828	0.0106877	0.00670429	17977/13078/104086/18976/13121/13122	6
R-MMU-1614558	Degradation of cysteine and homocysteine	4/508	12/8828	0.00370168	0.0106877	0.00670429	22117/27376/107869/56551	4
R-MMU-203615	eNOS activation	4/508	12/8828	0.00370168	0.0106877	0.00670429	51793/18777/12314/12313	4
R-MMU-73817	Purine ribonucleoside monophosphate biosynthesis	4/508	12/8828	0.00370168	0.0106877	0.00670429	11565/108147/67054/14450	4
R-MMU-75109	Triglyceride biosynthesis	4/508	12/8828	0.00370168	0.0106877	0.00670429	68393/215456/233549/67800	4
R-MMU-390918	Peroxisomal lipid metabolism	6/508	28/8828	0.00448254	0.0128791	0.00807893	171282/15488/67528/111175/74121/20524	6
R-MMU-422356	Regulation of insulin secretion	9/508	59/8828	0.00616519	0.017575	0.0110246	14696/223864/12288/16500/74205/18795/20526/18747/224129	9
R-MMU-1660662	Glycosphingolipid metabolism	7/508	39/8828	0.00617662	0.017575	0.0110246	14421/18010/74577/67902/52635/14466/56356	7
R-MMU-170822	Regulation of Glucokinase by Glucokinase Regulatory Protein	6/508	30/8828	0.00640862	0.0181475	0.0113837	18141/110379/231042/69482/231103/72124	6
R-MMU-9609507	Protein localization	13/508	106/8828	0.0076005	0.0214196	0.0134363	13850/171282/15488/71883/228061/30960/11947/67528/111175/70503/20524/14712/15926	13
R-MMU-111931	PKA-mediated phosphorylation of CREB	4/508	15/8828	0.00889418	0.0245947	0.015428	12314/12313/18747/224129	4
R-MMU-163615	PKA activation	4/508	15/8828	0.00889418	0.0245947	0.015428	12314/12313/18747/224129	4
R-MMU-1660516	Synthesis of PIPs at the early endosome membrane	4/508	15/8828	0.00889418	0.0245947	0.015428	269180/84095/234729/67073	4
R-MMU-8956320	Nucleobase biosynthesis	4/508	15/8828	0.00889418	0.0245947	0.015428	11565/108147/67054/14450	4
R-MMU-4085377	SUMOylation of SUMOylation proteins	6/508	33/8828	0.0103326	0.0284388	0.0178394	22196/18141/110379/231042/69482/72124	6
R-MMU-9033241	Peroxisomal protein import	9/508	64/8828	0.0104889	0.0287347	0.018025	13850/171282/15488/228061/67528/111175/70503/14712/15926	9
R-MMU-1483191	Synthesis of PC	5/508	24/8828	0.0105671	0.0288149	0.0180753	106861/237928/18618/12995/212862	5
R-MMU-202131	Metabolism of nitric oxide: eNOS activation and regulation	4/508	16/8828	0.011329	0.0307502	0.0192893	51793/18777/12314/12313	4
R-MMU-71384	Ethanol oxidation	3/508	10/8828	0.0167732	0.0453183	0.0284277	11669/26876/60525	3
R-MMU-3232142	SUMOylation of ubiquitinylation proteins	6/508	37/8828	0.0178739	0.0480717	0.0301549	22196/18141/110379/231042/69482/72124	6

## Sheet: Fig3C_edgeR_adipoqCre_DEG_sigUP
GENEID	SYMBOL
ENSMUSG00000051527	Usp29
ENSMUSG00000002266	Zim1
ENSMUSG00000074063	Osgin1
ENSMUSG00000031204	Asb12
ENSMUSG00000056749	Nfil3
ENSMUSG00000025185	Loxl4
ENSMUSG00000055116	Arntl
ENSMUSG00000039982	Dtx4
ENSMUSG00000002265	Peg3
ENSMUSG00000023067	Cdkn1a
ENSMUSG00000058153	Sez6l
ENSMUSG00000054204	Fam150b
ENSMUSG00000023873	1700010I14Rik
ENSMUSG00000024600	Slc27a6
ENSMUSG00000021287	Xrcc3
ENSMUSG00000029195	Klb
ENSMUSG00000086460	Gm12236
ENSMUSG00000025375	Aatk
ENSMUSG00000074607	Tox2
ENSMUSG00000021591	Glrx
ENSMUSG00000081564	Gm13717
ENSMUSG00000001119	Col6a1
ENSMUSG00000018983	E2f2
ENSMUSG00000030353	Tead4
ENSMUSG00000020889	Nr1d1
ENSMUSG00000001436	Slc19a1
ENSMUSG00000046961	Gpr156
ENSMUSG00000039620	6430573F11Rik
ENSMUSG00000038793	Lefty1
ENSMUSG00000036913	Trim67
ENSMUSG00000004098	Col5a3
ENSMUSG00000052889	Prkcb
ENSMUSG00000007888	Crlf1
ENSMUSG00000089774	Slc5a3
ENSMUSG00000045094	Arhgef37
ENSMUSG00000020241	Col6a2
ENSMUSG00000029009	Mthfr
ENSMUSG00000031980	Agt
ENSMUSG00000053617	Sh3pxd2a
ENSMUSG00000067199	Frat1
ENSMUSG00000039384	Dusp10
ENSMUSG00000003949	Hlf
ENSMUSG00000020131	Pcsk4
ENSMUSG00000005268	Prlr
ENSMUSG00000032348	Gsta4
ENSMUSG00000079652	Fam71f2
ENSMUSG00000022840	Adcy5
ENSMUSG00000028179	Cth
ENSMUSG00000030878	Cdr2
ENSMUSG00000050556	Kcnb1
ENSMUSG00000050212	Eva1b
ENSMUSG00000055652	Klhl25
ENSMUSG00000022546	Gpt
ENSMUSG00000031903	Pla2g15
ENSMUSG00000042487	Leo1
ENSMUSG00000038587	Akap12
ENSMUSG00000095930	Nim1
ENSMUSG00000017692	Rhbdl3
ENSMUSG00000041025	Iffo2
ENSMUSG00000003273	Car11
ENSMUSG00000041653	Pnpla3
ENSMUSG00000001506	Col1a1
ENSMUSG00000032902	Slc16a1
ENSMUSG00000030256	Bhlhe41
ENSMUSG00000040852	Plekhh2
ENSMUSG00000090083	Rnf8
ENSMUSG00000027208	Fgf7
ENSMUSG00000030096	Slc6a6
ENSMUSG00000015002	Efr3a
ENSMUSG00000031904	Slc7a6
ENSMUSG00000051314	Ffar2
ENSMUSG00000032452	Clstn2
ENSMUSG00000021559	Dapk1
ENSMUSG00000002985	Apoe
ENSMUSG00000003617	Cp
ENSMUSG00000004947	Dtx2
ENSMUSG00000025978	Rftn2
ENSMUSG00000055254	Ntrk2
ENSMUSG00000044468	Fam46c
ENSMUSG00000032491	Nradd
ENSMUSG00000026249	Serpine2
ENSMUSG00000023044	Csad
ENSMUSG00000021286	Zfyve21
ENSMUSG00000020743	Mif4gd
ENSMUSG00000020300	Cpeb4
ENSMUSG00000029238	Clock
ENSMUSG00000023079	Gtf2ird1
ENSMUSG00000068742	Cry2
ENSMUSG00000097080	1700086O06Rik
ENSMUSG00000053580	Tanc2
ENSMUSG00000034194	R3hcc1
ENSMUSG00000046897	Zfp740
ENSMUSG00000002550	Uck1
ENSMUSG00000036120	Rfxank
ENSMUSG00000035620	Ric8b
ENSMUSG00000041852	Tcf20
ENSMUSG00000025372	Baiap2
ENSMUSG00000006356	Crip2
ENSMUSG00000031565	Fgfr1
ENSMUSG00000044864	Ankrd50
ENSMUSG00000022791	Tnk2
ENSMUSG00000006782	Cnp
ENSMUSG00000025732	Fam195a
ENSMUSG00000022517	Mgrn1
ENSMUSG00000055707	Klhl26
ENSMUSG00000031749	St3gal2
ENSMUSG00000053819	Camk2d
ENSMUSG00000034135	Sik3
ENSMUSG00000041390	Mdfic
ENSMUSG00000039515	Ppp2r4
ENSMUSG00000028458	Tesk1
ENSMUSG00000021497	Txndc15
ENSMUSG00000031985	Gnpat
ENSMUSG00000024866	Acy3
ENSMUSG00000022822	Abcc5
ENSMUSG00000033416	Gucd1
ENSMUSG00000023277	Twf2
ENSMUSG00000030067	Foxp1
ENSMUSG00000015357	Clpx
ENSMUSG00000032397	Tipin
ENSMUSG00000023886	Smoc2
ENSMUSG00000063870	Chd4
ENSMUSG00000030741	Spns1
ENSMUSG00000032383	Ppib
ENSMUSG00000036106	Prr5
ENSMUSG00000062762	Ei24
ENSMUSG00000040414	Slc25a28
ENSMUSG00000028796	Phc2

## Sheet: Fig3C_edgeR_adipoqCre_sigDOWN
GENEID	SYMBOL
ENSMUSG00000066364	Serpina3b
ENSMUSG00000040035	Disp2
ENSMUSG00000079017	Ifi27l2a
ENSMUSG00000052974	Cyp2f2
ENSMUSG00000051225	Fam83a
ENSMUSG00000092021	Gbp11
ENSMUSG00000050315	Synpo2
ENSMUSG00000026227	2810459M11Rik
ENSMUSG00000090122	Kcne1l
ENSMUSG00000062609	Kcnj15
ENSMUSG00000022510	Trp63
ENSMUSG00000023036	Pcdhga9
ENSMUSG00000042532	Golga7b
ENSMUSG00000032332	Col12a1
ENSMUSG00000003863	Ppfia3
ENSMUSG00000022665	Ccdc80
ENSMUSG00000031253	Srpx2
ENSMUSG00000040016	Ptger3
ENSMUSG00000032841	Prr5l
ENSMUSG00000030972	Acsm5
ENSMUSG00000029591	Ung
ENSMUSG00000030108	Slc6a13
ENSMUSG00000075296	Aldh3b2
ENSMUSG00000087611	4930458D05Rik
ENSMUSG00000005947	Itgae
ENSMUSG00000010311	Optc
ENSMUSG00000032131	Abcg4
ENSMUSG00000034258	Mfsd7c
ENSMUSG00000020627	Klhl29
ENSMUSG00000032586	Traip
ENSMUSG00000026670	Uap1
ENSMUSG00000079164	Tlr5
ENSMUSG00000004105	Angptl2
ENSMUSG00000026676	Ccdc3
ENSMUSG00000046215	Rprml
ENSMUSG00000025347	Mettl7b
ENSMUSG00000030095	Tmem43
ENSMUSG00000026315	Serpinb8
ENSMUSG00000029759	Pon3
ENSMUSG00000036395	Glb1l2
ENSMUSG00000024664	Fads3
ENSMUSG00000032584	Mst1r
ENSMUSG00000097494	4933406C10Rik
ENSMUSG00000038145	Snrk
ENSMUSG00000040511	Pvr
ENSMUSG00000010663	Fads1
ENSMUSG00000029843	Slc13a4
ENSMUSG00000045838	A430105I19Rik
ENSMUSG00000034312	Iqsec1
ENSMUSG00000028207	Asph
ENSMUSG00000066800	Rnasel
ENSMUSG00000029482	Aacs
ENSMUSG00000017144	Rnd3
ENSMUSG00000010651	Acaa1b
ENSMUSG00000039529	Atp8b1
ENSMUSG00000038608	Dock10
ENSMUSG00000018846	Pank3
ENSMUSG00000066571	4931406P16Rik
ENSMUSG00000020572	Nampt
ENSMUSG00000040339	Fam102b
ENSMUSG00000026104	Stat1
ENSMUSG00000018217	Pmp22
ENSMUSG00000030737	Slco2b1
ENSMUSG00000048126	Col6a3
ENSMUSG00000036867	Smad6
ENSMUSG00000034854	Mfsd12
ENSMUSG00000026749	Nek6
ENSMUSG00000035357	Pdzrn3
ENSMUSG00000028793	Rnf19b
ENSMUSG00000015243	Abca1
ENSMUSG00000033658	Ddx19b
ENSMUSG00000041773	Enc1
ENSMUSG00000031295	Phka2
ENSMUSG00000022364	Tbc1d31
ENSMUSG00000048537	Phldb1
ENSMUSG00000039081	Zfp503
ENSMUSG00000024900	Cpt1a
ENSMUSG00000024663	Rab3il1
ENSMUSG00000034903	Cobll1
ENSMUSG00000045211	Nudt18
ENSMUSG00000021493	Pdlim7
ENSMUSG00000021236	Entpd5
ENSMUSG00000024640	Psat1
ENSMUSG00000022969	Il10rb
ENSMUSG00000030852	Tacc2
ENSMUSG00000021240	Abcd4
ENSMUSG00000063268	Parp10
ENSMUSG00000034947	Tmem106a
ENSMUSG00000030341	Tnfrsf1a
ENSMUSG00000022946	Dopey2
ENSMUSG00000021136	Smoc1
ENSMUSG00000058756	Thra
ENSMUSG00000030094	Xpc
ENSMUSG00000021583	Erap1
ENSMUSG00000020802	Ube2o
ENSMUSG00000023022	Lima1
ENSMUSG00000046876	Atxn1
ENSMUSG00000032312	Csk
ENSMUSG00000028063	Lmna
ENSMUSG00000020282	Rhbdf1
ENSMUSG00000040007	Bahd1
ENSMUSG00000045374	Wdr81
ENSMUSG00000021224	Numb

## Sheet: Fig3C_edgeR_adipoqCre_all_genes
GENEID	SYMBOL	logFC	logCPM	F	PValue	FDR
ENSMUSG00000074063	Osgin1	2.83758	5.2673	351.643	1.16e-10	1.95e-06
ENSMUSG00000062609	Kcnj15	-1.48993	7.11243	307.592	2.64e-10	2.22e-06
ENSMUSG00000039982	Dtx4	2.3271	6.00028	258.97	7.57e-10	4.24e-06
ENSMUSG00000056749	Nfil3	2.5398	3.97151	198.402	3.8e-09	1.6e-05
ENSMUSG00000015002	Efr3a	0.807374	6.0213	153.169	1.78e-08	4.99e-05
ENSMUSG00000001436	Slc19a1	1.33293	5.3128	157.798	1.49e-08	4.99e-05
ENSMUSG00000029195	Klb	1.69725	5.19092	137.265	3.4e-08	8.16e-05
ENSMUSG00000018983	E2f2	1.42935	3.04456	111.722	1.13e-07	0.000236657
ENSMUSG00000002265	Peg3	2.32709	5.71018	114.588	1.43e-07	0.000266029
ENSMUSG00000029009	Mthfr	1.11988	5.13708	102.253	1.87e-07	0.000286168
ENSMUSG00000021286	Zfyve21	0.673188	5.1001	103.23	1.78e-07	0.000286168
ENSMUSG00000031903	Pla2g15	0.895021	5.96517	99.536	2.19e-07	0.000291757
ENSMUSG00000053617	Sh3pxd2a	1.09867	8.93934	98.2444	2.35e-07	0.000291757
ENSMUSG00000030108	Slc6a13	-0.947074	6.54058	97.6873	2.43e-07	0.000291757
ENSMUSG00000001119	Col6a1	1.43967	10.6389	93.5129	3.12e-07	0.000348896
ENSMUSG00000025375	Aatk	1.62917	6.64521	90.1859	4.34e-07	0.000389908
ENSMUSG00000023067	Cdkn1a	2.28998	6.40893	97.3068	3.93e-07	0.000389908
ENSMUSG00000050212	Eva1b	0.907407	5.68495	89.3575	4.03e-07	0.000389908
ENSMUSG00000021591	Glrx	1.53351	3.06768	87.1275	4.64e-07	0.000389908
ENSMUSG00000041025	Iffo2	0.862949	4.70642	87.6078	4.5e-07	0.000389908
ENSMUSG00000031904	Slc7a6	0.805746	4.45312	84.6351	5.46e-07	0.000436958
ENSMUSG00000055652	Klhl25	0.906378	3.3613	81.805	6.61e-07	0.000504345
ENSMUSG00000040035	Disp2	-3.00122	2.86064	82.0731	7.02e-07	0.000512227
ENSMUSG00000030353	Tead4	1.40712	3.62513	73.7143	1.18e-06	0.000822845
ENSMUSG00000023873	1700010I14Rik	2.01239	0.723109	68.6261	1.74e-06	0.00114128
ENSMUSG00000042487	Leo1	0.883344	4.8546	67.7619	1.86e-06	0.00114128
ENSMUSG00000025185	Loxl4	2.45058	3.47781	70.4372	1.82e-06	0.00114128
ENSMUSG00000066364	Serpina3b	-4.05597	1.98414	68.1248	2.04e-06	0.00114128
ENSMUSG00000021287	Xrcc3	1.69945	4.32581	68.1509	2.03e-06	0.00114128
ENSMUSG00000002266	Zim1	3.31037	2.28295	67.5898	2.02e-06	0.00114128
ENSMUSG00000003949	Hlf	1.04363	5.25919	65.9413	2.16e-06	0.00116992
ENSMUSG00000020889	Nr1d1	1.40184	9.85053	65.0933	2.32e-06	0.00121551
ENSMUSG00000004105	Angptl2	-0.829139	8.40371	64.4611	2.44e-06	0.00124241
ENSMUSG00000004098	Col5a3	1.23345	11.3122	60.5077	3.43e-06	0.00169356
ENSMUSG00000022665	Ccdc80	-1.16356	10.7153	58.4287	4.13e-06	0.00198178
ENSMUSG00000026670	Uap1	-0.847696	6.46821	57.7181	4.41e-06	0.00205592
ENSMUSG00000046897	Zfp740	0.577423	6.12372	57.0255	4.7e-06	0.00213236
ENSMUSG00000022517	Mgrn1	0.508861	7.25892	55.5846	5.38e-06	0.0023764
ENSMUSG00000031204	Asb12	2.55031	1.43604	55.0112	5.68e-06	0.00244525
ENSMUSG00000032348	Gsta4	0.972424	6.04037	53.9337	6.3e-06	0.00264483
ENSMUSG00000038587	Akap12	0.871779	7.33645	53.2725	6.72e-06	0.00267007
ENSMUSG00000020241	Col6a2	1.14032	10.5518	53.2032	6.77e-06	0.00267007
ENSMUSG00000038608	Dock10	-0.672588	4.99171	53.0965	6.84e-06	0.00267007
ENSMUSG00000036395	Glb1l2	-0.756966	7.97738	51.9595	7.65e-06	0.00292104
ENSMUSG00000021497	Txndc15	0.468013	5.73747	51.0274	8.41e-06	0.0031377
ENSMUSG00000029843	Slc13a4	-0.727054	4.57954	50.6665	8.72e-06	0.00318446
ENSMUSG00000022546	Gpt	0.903113	8.41054	49.9884	9.35e-06	0.00334164
ENSMUSG00000048126	Col6a3	-0.608847	7.43098	49.1165	1.02e-05	0.00350968
ENSMUSG00000020743	Mif4gd	0.634675	6.49576	49.1682	1.02e-05	0.00350968
ENSMUSG00000029238	Clock	0.625516	4.58232	48.4185	1.1e-05	0.00370214
ENSMUSG00000022822	Abcc5	0.458916	6.16549	47.2432	1.25e-05	0.00411636
ENSMUSG00000055116	Arntl	2.42548	4.11443	51.1663	1.28e-05	0.00413171
ENSMUSG00000031980	Agt	1.09913	9.08011	46.5113	1.35e-05	0.00421381
ENSMUSG00000034903	Cobll1	-0.490579	6.44859	46.4281	1.37e-05	0.00421381
ENSMUSG00000039620	6430573F11Rik	1.30038	3.19695	44.5704	1.68e-05	0.00503858
ENSMUSG00000004947	Dtx2	0.761864	7.14995	44.4161	1.71e-05	0.00503858
ENSMUSG00000034312	Iqsec1	-0.706249	8.82037	43.2521	1.95e-05	0.00565984
ENSMUSG00000022969	Il10rb	-0.454926	5.62161	42.5355	2.13e-05	0.00604968
ENSMUSG00000038145	Snrk	-0.735261	7.30924	42.346	2.17e-05	0.00608316
ENSMUSG00000095930	Nim1	0.871274	2.91048	42.0357	2.25e-05	0.00620728
ENSMUSG00000032584	Mst1r	-0.747985	5.50221	41.3469	2.45e-05	0.00663086
ENSMUSG00000045094	Arhgef37	1.1578	2.66743	41.0623	2.53e-05	0.00675346
ENSMUSG00000020627	Klhl29	-0.863876	2.82002	40.8404	2.6e-05	0.00682905
ENSMUSG00000050556	Kcnb1	0.916508	6.39232	40.6691	2.66e-05	0.00686551
ENSMUSG00000022840	Adcy5	0.953545	8.0971	40.1665	2.83e-05	0.0071905
ENSMUSG00000028793	Rnf19b	-0.56094	5.7189	39.5684	3.04e-05	0.00762713
ENSMUSG00000026749	Nek6	-0.566822	5.67194	39.3857	3.11e-05	0.00768806
ENSMUSG00000020300	Cpeb4	0.631592	4.42616	38.2447	3.6e-05	0.00828376
ENSMUSG00000068742	Cry2	0.618211	6.86918	38.3681	3.54e-05	0.00828376
ENSMUSG00000026315	Serpinb8	-0.771263	3.57543	38.387	3.53e-05	0.00828376
ENSMUSG00000041852	Tcf20	0.552573	5.7303	38.6002	3.44e-05	0.00828376
ENSMUSG00000028458	Tesk1	0.47912	6.45419	38.2332	3.6e-05	0.00828376
ENSMUSG00000051225	Fam83a	-1.95937	4.86893	40.4993	3.98e-05	0.00903029
ENSMUSG00000035620	Ric8b	0.553726	5.23213	37.0914	4.17e-05	0.00934531
ENSMUSG00000023044	Csad	0.675498	7.75154	36.7311	4.38e-05	0.00942105
ENSMUSG00000021236	Entpd5	-0.47857	5.59889	36.8329	4.32e-05	0.00942105
ENSMUSG00000023022	Lima1	-0.339142	6.57911	36.8126	4.33e-05	0.00942105
ENSMUSG00000010651	Acaa1b	-0.691784	5.92113	36.1409	4.73e-05	0.00993316
ENSMUSG00000053580	Tanc2	0.604684	4.72313	36.2188	4.68e-05	0.00993316
ENSMUSG00000025372	Baiap2	0.549563	7.32899	35.9825	4.83e-05	0.0100205
ENSMUSG00000054204	Fam150b	2.14699	3.42479	37.4756	4.98e-05	0.0101894
ENSMUSG00000034854	Mfsd12	-0.589845	5.38456	35.6703	5.04e-05	0.0101977
ENSMUSG00000031565	Fgfr1	0.524749	8.90306	35.4395	5.2e-05	0.0103953
ENSMUSG00000010311	Optc	-0.881371	1.86423	35.086	5.46e-05	0.0107322
ENSMUSG00000050315	Synpo2	-1.86672	7.49668	37.7195	5.5e-05	0.0107322
ENSMUSG00000040007	Bahd1	-0.304802	5.2983	34.8586	5.63e-05	0.0107725
ENSMUSG00000006782	Cnp	0.512321	4.47722	34.8367	5.65e-05	0.0107725
ENSMUSG00000036120	Rfxank	0.558227	4.5891	34.1894	6.17e-05	0.0116478
ENSMUSG00000040339	Fam102b	-0.615963	5.55337	34.0999	6.25e-05	0.0116628
ENSMUSG00000006356	Crip2	0.52601	7.83609	33.9255	6.4e-05	0.01178
ENSMUSG00000074607	Tox2	1.59953	2.11167	33.8711	6.45e-05	0.01178
ENSMUSG00000046961	Gpr156	1.31782	3.88968	33.2543	7.59e-05	0.0131994
ENSMUSG00000020572	Nampt	-0.621841	6.86262	32.7434	7.57e-05	0.0131994
ENSMUSG00000020282	Rhbdf1	-0.327323	6.80386	32.7859	7.53e-05	0.0131994
ENSMUSG00000030096	Slc6a6	0.808083	7.3264	32.9627	7.34e-05	0.0131994
ENSMUSG00000030741	Spns1	0.365623	5.42255	32.6968	7.62e-05	0.0131994
ENSMUSG00000079164	Tlr5	-0.835837	2.34322	32.5262	7.81e-05	0.0133901
ENSMUSG00000039515	Ppp2r4	0.479248	7.96892	32.4028	7.95e-05	0.0134934
ENSMUSG00000005947	Itgae	-0.904143	1.80663	32.2882	8.09e-05	0.0135823
ENSMUSG00000081564	Gm13717	1.47974	0.950276	31.8764	8.59e-05	0.0141406
ENSMUSG00000032491	Nradd	0.697413	2.78001	31.9178	8.54e-05	0.0141406
ENSMUSG00000063870	Chd4	0.381944	8.31827	31.4629	9.13e-05	0.0148826
ENSMUSG00000022510	Trp63	-1.38589	1.14136	31.3557	9.27e-05	0.0149754
ENSMUSG00000024900	Cpt1a	-0.518487	6.50368	30.9951	9.79e-05	0.0155039
ENSMUSG00000029591	Ung	-0.997387	3.51737	31.0065	9.77e-05	0.0155039
ENSMUSG00000001506	Col1a1	0.834408	9.51831	30.9289	9.88e-05	0.015512
ENSMUSG00000021559	Dapk1	0.78036	6.78592	30.7394	0.000101692	0.0155247
ENSMUSG00000062762	Ei24	0.333351	6.53994	30.8149	0.000100543	0.0155247
ENSMUSG00000035357	Pdzrn3	-0.563657	5.79924	30.7808	0.00010106	0.0155247
ENSMUSG00000055707	Klhl26	0.506911	5.06643	30.5575	0.000104522	0.0157676
ENSMUSG00000089774	Slc5a3	1.17439	5.45427	31.4006	0.000106377	0.0157676
ENSMUSG00000058756	Thra	-0.368298	7.24773	30.5066	0.000105329	0.0157676
ENSMUSG00000036913	Trim67	1.27964	4.12735	31.0721	0.000107039	0.0157676
ENSMUSG00000030067	Foxp1	0.42716	5.06349	30.1453	0.000111278	0.0161094
ENSMUSG00000018846	Pank3	-0.6718	7.16204	30.1817	0.000110661	0.0161094
ENSMUSG00000033416	Gucd1	0.43749	6.03119	30.0145	0.000113526	0.0162943
ENSMUSG00000003617	Cp	0.769406	8.08332	29.9067	0.000115419	0.0164256
ENSMUSG00000021493	Pdlim7	-0.482751	6.21729	29.477	0.000123336	0.0173155
ENSMUSG00000003863	Ppfia3	-1.18585	2.56423	29.4563	0.000123733	0.0173155
ENSMUSG00000067199	Frat1	1.06881	1.87938	29.0379	0.000132084	0.0183312
ENSMUSG00000021240	Abcd4	-0.451623	4.37749	28.8161	0.000136774	0.0188266
ENSMUSG00000024664	Fads3	-0.750127	9.2204	28.6767	0.00013982	0.0190895
ENSMUSG00000015243	Abca1	-0.552849	6.25158	28.0545	0.000154416	0.0205951
ENSMUSG00000063268	Parp10	-0.422072	5.16481	28.05	0.000154528	0.0205951
ENSMUSG00000040852	Plekhh2	0.817653	3.39517	28.0862	0.000153631	0.0205951
ENSMUSG00000032332	Col12a1	-1.25404	2.55648	27.6486	0.000164888	0.0214649
ENSMUSG00000042532	Golga7b	-1.26907	2.85152	27.7224	0.000162925	0.0214649
ENSMUSG00000029759	Pon3	-0.765163	5.77827	27.6647	0.000164459	0.0214649
ENSMUSG00000046215	Rprml	-0.817739	4.0707	27.5169	0.000168463	0.0216761
ENSMUSG00000030852	Tacc2	-0.454291	6.9342	27.494	0.000169092	0.0216761
ENSMUSG00000032452	Clstn2	0.781542	3.60872	27.3	0.000174545	0.0222056
ENSMUSG00000034194	R3hcc1	0.590652	5.76522	26.935	0.000185364	0.0234047
ENSMUSG00000052889	Prkcb	1.19708	2.65645	26.874	0.000187247	0.0234659
ENSMUSG00000026676	Ccdc3	-0.826403	5.43174	26.877	0.000189102	0.0235228
ENSMUSG00000007888	Crlf1	1.19698	1.80849	26.6479	0.000194424	0.0238681
ENSMUSG00000090083	Rnf8	0.814392	2.51537	26.6388	0.00019472	0.0238681
ENSMUSG00000026249	Serpine2	0.693604	5.79285	26.5735	0.000196853	0.0239547
ENSMUSG00000048537	Phldb1	-0.530782	9.10638	26.4957	0.000199434	0.0239941
ENSMUSG00000040511	Pvr	-0.734058	4.88041	26.4353	0.000201463	0.0239941
ENSMUSG00000021136	Smoc1	-0.37308	8.43195	26.4387	0.000201349	0.0239941
ENSMUSG00000025978	Rftn2	0.75839	2.39594	26.259	0.000207524	0.0245419
ENSMUSG00000055254	Ntrk2	0.753541	8.05446	26.1887	0.000210002	0.0246612
ENSMUSG00000041653	Pnpla3	0.849796	9.91286	26.1165	0.000212579	0.0247906
ENSMUSG00000020131	Pcsk4	0.990975	4.46631	26.2803	0.00021722	0.0249236
ENSMUSG00000034135	Sik3	0.494283	6.65043	26.0185	0.000216139	0.0249236
ENSMUSG00000029482	Aacs	-0.69357	7.76635	25.8148	0.000223759	0.025389
ENSMUSG00000044864	Ankrd50	0.515924	4.76275	25.5916	0.000232469	0.0260257
ENSMUSG00000028207	Asph	-0.705147	6.84029	25.6146	0.000231552	0.0260257
ENSMUSG00000097080	1700086O06Rik	0.613567	2.35423	25.4941	0.000236397	0.0262902
ENSMUSG00000003273	Car11	0.860489	4.19215	25.4081	0.000239927	0.026334
ENSMUSG00000079017	Ifi27l2a	-2.08916	8.02691	27.5782	0.000238367	0.026334
ENSMUSG00000028063	Lmna	-0.329627	7.64776	25.3258	0.00024336	0.0265373
ENSMUSG00000053819	Camk2d	0.50042	6.51037	25.198	0.000248805	0.0269561
ENSMUSG00000033658	Ddx19b	-0.545896	4.30966	25.0941	0.000253339	0.0272713
ENSMUSG00000092021	Gbp11	-1.92352	2.26201	25.1492	0.000258794	0.0275831
ENSMUSG00000017692	Rhbdl3	0.865422	4.93866	25.0782	0.000259521	0.0275831
ENSMUSG00000044468	Fam46c	0.723595	2.3246	24.849	0.000264414	0.0278774
ENSMUSG00000051314	Ffar2	0.789802	6.15934	24.9395	0.00026723	0.0278774
ENSMUSG00000027208	Fgf7	0.80899	2.21673	24.7174	0.00027059	0.0278774
ENSMUSG00000041390	Mdfic	0.488568	5.2594	24.7683	0.000268178	0.0278774
ENSMUSG00000032383	Ppib	0.351303	7.5951	24.7341	0.000269796	0.0278774
ENSMUSG00000066571	4931406P16Rik	-0.638737	6.36352	24.6138	0.000275572	0.0278776
ENSMUSG00000005268	Prlr	0.989995	4.12646	24.7844	0.000274784	0.0278776
ENSMUSG00000024663	Rab3il1	-0.503398	4.65734	24.6488	0.000273875	0.0278776
ENSMUSG00000031253	Srpx2	-1.10979	5.10669	25.2838	0.00027742	0.0278965
ENSMUSG00000032131	Abcg4	-0.86749	3.09769	24.4986	0.000281235	0.0281118
ENSMUSG00000030094	Xpc	-0.367834	5.70065	24.4398	0.000284174	0.0282375
ENSMUSG00000036106	Prr5	0.34686	6.24376	24.1743	0.000297914	0.0294286
ENSMUSG00000045374	Wdr81	-0.297012	5.15925	24.0126	0.000306661	0.0301155
ENSMUSG00000034258	Mfsd7c	-0.867412	1.79268	23.7744	0.00032009	0.0312516
ENSMUSG00000028179	Cth	0.944732	3.21312	23.6917	0.000324915	0.0315393
ENSMUSG00000028796	Phc2	0.301417	6.53172	23.2949	0.000349249	0.0335139
ENSMUSG00000075296	Aldh3b2	-0.910657	4.60127	23.4538	0.000353224	0.0336886
ENSMUSG00000052974	Cyp2f2	-2.03588	3.2464	24.2279	0.000358478	0.0336886
ENSMUSG00000030737	Slco2b1	-0.613129	6.8995	23.1973	0.000355555	0.0336886
ENSMUSG00000023277	Twf2	0.427998	4.59631	23.1434	0.000359093	0.0336886
ENSMUSG00000030878	Cdr2	0.919583	6.69647	23.546	0.000364163	0.0339744
ENSMUSG00000039384	Dusp10	1.0563	5.10887	23.6331	0.000366715	0.0340234
ENSMUSG00000002550	Uck1	0.559057	7.51903	22.9486	0.000372232	0.0341579
ENSMUSG00000039081	Zfp503	-0.520119	6.03757	22.9505	0.000372099	0.0341579
ENSMUSG00000097494	4933406C10Rik	-0.741847	1.95761	22.7207	0.000388307	0.0354393
ENSMUSG00000087611	4930458D05Rik	-0.905178	2.89879	22.5459	0.000401187	0.0362754
ENSMUSG00000045838	A430105I19Rik	-0.726661	6.15322	22.6004	0.000403006	0.0362754
ENSMUSG00000022791	Tnk2	0.513632	7.3261	22.5093	0.000403949	0.0362754
ENSMUSG00000002985	Apoe	0.776762	12.796	22.388	0.000413254	0.03687
ENSMUSG00000015357	Clpx	0.423682	5.91363	22.3661	0.000414961	0.03687
ENSMUSG00000022946	Dopey2	-0.381281	5.72176	22.2082	0.000427502	0.0376564
ENSMUSG00000040016	Ptger3	-1.04417	5.8971	22.9415	0.000428296	0.0376564
ENSMUSG00000026227	2810459M11Rik	-1.53124	2.09537	22.0537	0.000440207	0.0385021
ENSMUSG00000030972	Acsm5	-1.0281	4.06897	22.2233	0.000450684	0.038812
ENSMUSG00000024866	Acy3	0.460618	5.39646	21.9355	0.000450219	0.038812
ENSMUSG00000025732	Fam195a	0.511136	4.79836	21.9659	0.000447614	0.038812
ENSMUSG00000025347	Mettl7b	-0.776826	4.03547	21.7991	0.000462101	0.0395921
ENSMUSG00000040414	Slc25a28	0.327915	6.1357	21.7515	0.000466334	0.039752
ENSMUSG00000032312	Csk	-0.330966	6.24524	21.6458	0.000475899	0.0400306
ENSMUSG00000024640	Psat1	-0.470352	7.43207	21.6204	0.000478226	0.0400306
ENSMUSG00000032397	Tipin	0.399997	3.70453	21.6713	0.000473575	0.0400306
ENSMUSG00000030095	Tmem43	-0.776381	8.38449	21.6106	0.000479137	0.0400306
ENSMUSG00000039529	Atp8b1	-0.689198	2.2824	21.5178	0.000487781	0.0403513
ENSMUSG00000023886	Smoc2	0.387292	6.54787	21.5319	0.000486459	0.0403513
ENSMUSG00000046876	Atxn1	-0.334639	4.79416	21.3826	0.000500713	0.0409906
ENSMUSG00000031295	Phka2	-0.535221	6.23638	21.4014	0.00049889	0.0409906
ENSMUSG00000032586	Traip	-0.860664	2.27129	21.3608	0.000502833	0.0409906
ENSMUSG00000041773	Enc1	-0.545732	4.69167	21.2865	0.000510142	0.0411866
ENSMUSG00000030256	Bhlhe41	0.828823	5.65388	21.509	0.000515657	0.0414327
ENSMUSG00000038793	Lefty1	1.28526	2.01036	21.1716	0.000521688	0.0415199
ENSMUSG00000058153	Sez6l	2.2128	3.98984	22.9068	0.000520636	0.0415199
ENSMUSG00000079652	Fam71f2	0.963434	-0.0471624	21.0268	0.000536677	0.0419182
ENSMUSG00000090122	Kcne1l	-1.50822	1.75351	21.0498	0.000534269	0.0419182
ENSMUSG00000045211	Nudt18	-0.487986	6.97326	21.0625	0.000532934	0.0419182
ENSMUSG00000034947	Tmem106a	-0.392004	6.08799	20.8417	0.000556573	0.043271
ENSMUSG00000023079	Gtf2ird1	0.624638	4.88858	20.7894	0.000562342	0.043518
ENSMUSG00000021224	Numb	-0.240338	5.47259	20.7514	0.000566586	0.0436003
ENSMUSG00000032902	Slc16a1	0.829375	5.05709	20.9158	0.000568598	0.0436003
ENSMUSG00000031985	Gnpat	0.46412	8.05314	20.6998	0.000572405	0.0436927
ENSMUSG00000051527	Usp29	3.94707	-1.59672	20.5803	0.000586141	0.0445388
ENSMUSG00000036867	Smad6	-0.602139	4.31381	20.5415	0.000590684	0.0446818
ENSMUSG00000066800	Rnasel	-0.696527	4.74264	20.2857	0.000621672	0.0457884
ENSMUSG00000024600	Slc27a6	1.69982	1.81011	20.3738	0.000610786	0.0457884
ENSMUSG00000022364	Tbc1d31	-0.532467	3.95833	20.3167	0.000617811	0.0457884
ENSMUSG00000030341	Tnfrsf1a	-0.38234	8.40528	20.3116	0.000618439	0.0457884
ENSMUSG00000010663	Fads1	-0.730707	6.89178	20.2938	0.00063197	0.046142
ENSMUSG00000026104	Stat1	-0.615107	4.85756	20.2187	0.000630097	0.046142
ENSMUSG00000018217	Pmp22	-0.613203	8.13062	20.1684	0.000636508	0.0462722
ENSMUSG00000086460	Gm12236	1.64122	1.13088	19.9381	0.000666844	0.0482222
ENSMUSG00000023036	Pcdhga9	-1.30569	0.157858	19.9217	0.000669075	0.0482222
ENSMUSG00000017144	Rnd3	-0.692092	4.25853	19.8401	0.000680265	0.0488192
ENSMUSG00000021583	Erap1	-0.36434	5.25057	19.7904	0.000687184	0.0488978
ENSMUSG00000031749	St3gal2	0.500542	5.92466	19.7958	0.00068644	0.0488978
ENSMUSG00000032841	Prr5l	-1.03592	3.75165	19.9297	0.000692511	0.049069
ENSMUSG00000020802	Ube2o	-0.344041	5.48074	19.6835	0.000702366	0.0495581
ENSMUSG00000037735	2810032G03Rik	-1.04595	1.37306	19.563	0.000719935	0.0500156
ENSMUSG00000030088	Aldh1l1	-0.691775	7.84952	19.6075	0.000713381	0.0500156
ENSMUSG00000045215	Asxl3	1.49881	-0.630627	19.545	0.000722602	0.0500156
ENSMUSG00000027624	Epb4.1l1	-0.510742	8.03181	19.4975	0.000729698	0.0500156
ENSMUSG00000006344	Ggt5	0.400878	5.00712	19.5298	0.00072486	0.0500156
ENSMUSG00000032549	Rab6b	0.463607	5.38034	19.5288	0.000725012	0.0500156
ENSMUSG00000079013	Serpina3j	-1.68626	0.22705	19.3562	0.000751295	0.0512866
ENSMUSG00000031770	Herpud1	0.236202	6.78893	19.2884	0.000761913	0.0518008
ENSMUSG00000037411	Serpine1	-0.88288	6.39104	19.6745	0.000771414	0.0522353
ENSMUSG00000032191	Bcl2l10	0.782725	1.72067	19.0051	0.000808242	0.0545092
ENSMUSG00000015085	Entpd2	0.642768	4.93875	18.9602	0.000815869	0.0548036
ENSMUSG00000049076	Acap2	-0.335718	4.876	18.7856	0.000846374	0.0550515
ENSMUSG00000033096	Apmap	0.60432	8.43076	18.8492	0.000835117	0.0550515
ENSMUSG00000037686	Aspg	1.16118	1.32846	18.7342	0.000855621	0.0550515
ENSMUSG00000031214	Ophn1	0.54949	5.71905	18.7683	0.000849469	0.0550515
ENSMUSG00000029108	Pcdh7	-0.663642	4.86904	18.8995	0.00082634	0.0550515
ENSMUSG00000033065	Pfkm	0.297928	5.18764	18.8226	0.000839809	0.0550515
ENSMUSG00000016128	Stard13	-0.563222	4.88486	18.8638	0.000832562	0.0550515
ENSMUSG00000052698	Tln2	0.683618	7.24335	18.8985	0.000828852	0.0550515
ENSMUSG00000025995	Wdr75	0.330647	4.38945	18.8264	0.00083913	0.0550515
ENSMUSG00000034075	Zdhhc5	-0.241553	6.58824	18.7401	0.000854554	0.0550515
ENSMUSG00000043518	Rai2	-0.469728	5.3555	18.6833	0.000864866	0.055434
ENSMUSG00000024940	Ltbp3	-0.334093	9.27662	18.6308	0.000874537	0.0558407
ENSMUSG00000071655	Ubxn1	0.288427	8.03861	18.5983	0.00088058	0.0560136
ENSMUSG00000057766	Ankrd29	-0.696316	3.67634	18.4297	0.000912759	0.0576239
ENSMUSG00000020591	Ntsr2	0.63525	4.35722	18.4384	0.000911066	0.0576239
ENSMUSG00000025488	Cox8b	-1.48956	2.6021	18.51	0.000926172	0.0580343
ENSMUSG00000030203	Dusp16	-0.4554	3.68082	18.3682	0.000924836	0.0580343
ENSMUSG00000028461	Ccdc107	0.518699	4.06367	18.3141	0.000935599	0.0584071
ENSMUSG00000037493	Cib2	0.691852	7.89533	18.2731	0.000943865	0.0587049
ENSMUSG00000028865	Cd164l2	-0.634009	2.09069	18.2381	0.000950991	0.0589299
ENSMUSG00000038403	Hfe2	3.20157	0.913284	18.6012	0.000961087	0.0590037
ENSMUSG00000035226	Rims4	0.413637	3.96681	18.1929	0.000960262	0.0590037
ENSMUSG00000050379	Sept6	0.515108	4.4389	18.181	0.000962724	0.0590037
ENSMUSG00000047528	Als2cr12	0.583784	4.89932	18.0972	0.000980291	0.0597996
ENSMUSG00000050332	Amer1	0.603714	3.73968	18.0852	0.000982831	0.0597996
ENSMUSG00000029314	Agpat9	-0.83831	6.66578	18.2038	0.00103715	0.0628765
ENSMUSG00000057716	Tmem178b	-0.955067	1.16982	17.7977	0.00104612	0.0631922
ENSMUSG00000025887	Casp12	-0.691486	3.64162	17.7711	0.00105219	0.0633315
ENSMUSG00000003038	Hmgn2	0.284537	6.46384	17.7236	0.00106318	0.0637643
ENSMUSG00000032300	1700017B05Rik	0.508971	5.62075	17.7062	0.00106724	0.0637797
ENSMUSG00000001604	Tcea3	1.20978	3.46958	17.9663	0.00107524	0.0640301
ENSMUSG00000046337	Fam178b	0.769031	1.25238	17.5546	0.00110333	0.0650645
ENSMUSG00000051648	Kctd19	1.92922	0.763099	17.5572	0.00110271	0.0650645
ENSMUSG00000028359	Orm3	-0.748983	4.44209	17.5906	0.00110713	0.0650645
ENSMUSG00000038861	Pi4kb	-0.222251	5.88153	17.535	0.00110811	0.0650645
ENSMUSG00000027947	Il6ra	-0.539986	5.2222	17.5039	0.00111573	0.0652838
ENSMUSG00000024308	Tapbp	-0.482924	7.85065	17.44	0.00113157	0.0659806
ENSMUSG00000032911	Cspg4	-0.482835	6.70251	17.2751	0.00117369	0.0681997
ENSMUSG00000022893	Adamts1	-0.510221	5.43906	17.1605	0.00120402	0.0694812
ENSMUSG00000023909	Paqr4	-0.487958	5.80982	17.1728	0.00120072	0.0694812
ENSMUSG00000029313	Aff1	-0.320788	5.76596	17.103	0.00121958	0.0697365
ENSMUSG00000027933	Ints3	-0.243382	5.79267	17.0981	0.0012209	0.0697365
ENSMUSG00000031586	Rbpms	-0.201173	6.78519	17.1085	0.00121808	0.0697365
ENSMUSG00000039680	Mrps6	0.661614	6.32968	17.1442	0.00123243	0.0701566
ENSMUSG00000042672	Dcst1	-0.892	4.82852	17.3464	0.00124225	0.0702394
ENSMUSG00000030244	Gys2	-1.42743	4.49892	17.9513	0.00124204	0.0702394
ENSMUSG00000075703	Ept1	0.467937	4.34802	16.892	0.0012787	0.0720579
ENSMUSG00000025034	Trim8	-0.342334	6.57989	16.8687	0.00128544	0.072195
ENSMUSG00000024785	Rcl1	-0.44835	5.13493	16.8174	0.00130042	0.0725515
ENSMUSG00000002233	Rhoc	0.283002	7.38464	16.8197	0.00129973	0.0725515
ENSMUSG00000022096	Hr	-0.545193	7.6814	16.7851	0.00130995	0.072841
ENSMUSG00000024242	Map4k3	-0.272363	5.86886	16.7662	0.00131557	0.0729119
ENSMUSG00000001248	Gramd1a	-0.306404	6.61813	16.7308	0.00132614	0.0730161
ENSMUSG00000028980	H6pd	-0.567058	9.32431	16.7433	0.00132239	0.0730161
ENSMUSG00000033855	Ston1	0.653009	3.84692	16.7081	0.00133299	0.0731531
ENSMUSG00000035283	Adrb1	-1.2684	3.40705	16.9897	0.0013477	0.0734804
ENSMUSG00000025584	Pde8a	-0.299149	4.88307	16.6643	0.00134632	0.0734804
ENSMUSG00000027546	Atp9a	-0.468452	8.17993	16.6322	0.00135617	0.0735659
ENSMUSG00000024038	Ndufv3	0.410347	7.59632	16.6262	0.00135803	0.0735659
ENSMUSG00000046312	AI464131	-0.496693	5.96777	16.5719	0.00137491	0.0742408
ENSMUSG00000049047	Armcx3	-0.390104	3.74586	16.5342	0.00138678	0.0746418
ENSMUSG00000024747	Aldh1a7	-0.424829	7.28655	16.4404	0.00141688	0.0758589
ENSMUSG00000037664	Cdkn1c	0.523362	5.73654	16.4356	0.00141843	0.0758589
ENSMUSG00000004040	Stat3	-0.358849	7.13231	16.4141	0.00142544	0.0759917
ENSMUSG00000040957	Cables1	0.59614	5.02226	16.3585	0.00144373	0.0767235
ENSMUSG00000041577	Prelp	-0.778048	10.6676	16.3114	0.00145944	0.0773137
ENSMUSG00000019944	Rhobtb1	-0.468088	5.54691	16.2301	0.00148704	0.0783978
ENSMUSG00000018651	Tada2a	0.338951	3.91343	16.2237	0.00148924	0.0783978
ENSMUSG00000038936	Sccpdh	-0.339787	5.10791	16.1717	0.00150728	0.0790992
ENSMUSG00000041729	Coro2b	0.344026	6.08839	16.1425	0.00151748	0.0792192
ENSMUSG00000039254	Pomt1	0.344281	6.02366	16.1382	0.001519	0.0792192
ENSMUSG00000025279	Dnase1l3	0.683144	2.07198	16.0678	0.001544	0.0802736
ENSMUSG00000019189	Rnf145	-0.206065	5.95935	16.0075	0.0015658	0.0811557
ENSMUSG00000015957	Wnt11	0.849606	2.61441	15.9922	0.00157141	0.0811957
ENSMUSG00000009216	Fam163b	1.89317	-0.197201	15.8986	0.00160609	0.0814273
ENSMUSG00000062785	Kcnc3	-0.628301	5.07376	15.8981	0.00160626	0.0814273
ENSMUSG00000005417	Mprip	0.262169	8.39307	15.9014	0.00160503	0.0814273
ENSMUSG00000017774	Myo1c	-0.550047	9.43097	15.8886	0.00160983	0.0814273
ENSMUSG00000030545	Pex11a	-0.53213	6.20418	15.9018	0.00160489	0.0814273
ENSMUSG00000002871	Tpra1	0.316849	5.22403	15.9294	0.00159456	0.0814273
ENSMUSG00000014418	Hps5	-0.250793	4.92366	15.8575	0.00162159	0.081776
ENSMUSG00000036611	Eepd1	-0.711032	8.79103	15.8107	0.00163947	0.0821839
ENSMUSG00000029674	Limk1	-0.279642	4.53937	15.8185	0.00163648	0.0821839
ENSMUSG00000031227	Magee1	-0.342849	4.05191	15.7043	0.001681	0.0840148
ENSMUSG00000078866	Gm14420	-0.84957	4.09288	15.806	0.00170151	0.0847664
ENSMUSG00000066361	Serpina3c	-0.645008	8.002	15.6413	0.00170613	0.0847664
ENSMUSG00000054843	Atrnl1	-0.385347	4.7068	15.578	0.00173184	0.0857898
ENSMUSG00000018481	Appbp2	-0.372783	5.19896	15.4726	0.00177569	0.0871904
ENSMUSG00000034522	Zfp395	-0.373169	6.53686	15.4942	0.00176659	0.0871904
ENSMUSG00000066278	Vps37b	0.43843	3.62349	15.4276	0.00179477	0.0878705
ENSMUSG00000037348	Paqr7	-0.327871	5.34277	15.3728	0.00181836	0.0885091
ENSMUSG00000026504	Sdccag8	-0.328586	4.25443	15.3824	0.00181417	0.0885091
ENSMUSG00000036534	Slc38a7	-0.354158	5.34147	15.3152	0.00184351	0.0894743
ENSMUSG00000001520	Nrip2	0.529582	2.66813	15.2671	0.00186486	0.0902495
ENSMUSG00000022181	C6	-1.25812	5.32819	16.0292	0.00187131	0.0903016
ENSMUSG00000042251	Pm20d1	-0.517811	3.44879	15.1239	0.0019301	0.0915599
ENSMUSG00000036894	Rap2b	-0.379042	4.85627	15.1647	0.00191124	0.0915599
ENSMUSG00000069835	Sat2	0.344155	3.4997	15.14	0.00192264	0.0915599
ENSMUSG00000026062	Slc9a2	1.79043	0.540126	15.1275	0.00192844	0.0915599
ENSMUSG00000054850	6330419J24Rik	-1.04868	0.748383	15.0363	0.00197131	0.091956
ENSMUSG00000094786	Gm14403	-0.800114	2.21459	15.0508	0.00196442	0.091956
ENSMUSG00000023191	Leprel2	0.419021	4.33685	15.0697	0.00195547	0.091956
ENSMUSG00000025764	Phf17	0.386275	5.47042	15.0387	0.00197015	0.091956
ENSMUSG00000039611	Tmem246	0.657559	2.2729	15.0493	0.00196514	0.091956
ENSMUSG00000048040	Arxes2	-0.680076	4.46576	15.0156	0.001997	0.0928967
ENSMUSG00000060477	Irak2	0.527509	6.22592	14.9395	0.00201803	0.0936153
ENSMUSG00000085151	1110018N20Rik	0.69222	3.02288	14.9121	0.00203152	0.0937232
ENSMUSG00000097994	Gm26982	0.652333	1.2733	14.9177	0.00202876	0.0937232
ENSMUSG00000097730	Gm26588	0.700347	3.14495	14.8564	0.00205917	0.0947162
ENSMUSG00000073460	Pnldc1	1.14557	3.64173	15.1517	0.00206432	0.0947162
ENSMUSG00000030257	Srgap3	1.1466	2.5457	14.8142	0.00208043	0.0951954
ENSMUSG00000028015	Ctso	-0.348408	5.70898	14.7798	0.00209799	0.0955863
ENSMUSG00000021481	Zfp346	0.292993	3.94607	14.7752	0.00210036	0.0955863
ENSMUSG00000026353	Ubxn4	-0.218694	6.52208	14.6958	0.00214153	0.0969346
ENSMUSG00000056602	Fry	-0.583977	7.31922	14.6765	0.00215167	0.0971319
ENSMUSG00000022884	Eif4a2	0.525126	8.11905	14.573	0.00220705	0.0993644
ENSMUSG00000039697	Ncoa7	0.64295	3.0642	14.4974	0.00224856	0.100963
ENSMUSG00000036478	Btg1	0.493835	6.56501	14.4544	0.00227253	0.101767
ENSMUSG00000009905	Kdsr	-0.347751	5.44487	14.4425	0.00227924	0.101796
ENSMUSG00000055972	2810407A14Rik	-0.88507	1.16263	14.2469	0.00239267	0.10407
ENSMUSG00000075277	6720416L17Rik	1.58945	0.118564	14.2439	0.00239445	0.10407
ENSMUSG00000029722	Agfg2	-0.278809	5.85735	14.2834	0.00237104	0.10407
ENSMUSG00000007827	Ankrd26	0.586227	1.45341	14.3034	0.00235924	0.10407
ENSMUSG00000030630	Fah	0.448014	8.05376	14.2991	0.00236179	0.10407
ENSMUSG00000000127	Fer	-0.372775	4.29293	14.297	0.002363	0.10407
ENSMUSG00000008734	Gprc5b	-0.409831	7.53466	14.3164	0.00235163	0.10407
ENSMUSG00000060981	Hist1h4h	-0.829787	3.29806	14.2374	0.00239833	0.10407
ENSMUSG00000009281	Rarres2	-0.559116	8.17317	14.2571	0.00238659	0.10407
ENSMUSG00000053559	Smagp	0.296525	4.34942	14.3383	0.00233887	0.10407
ENSMUSG00000024962	Vegfb	-0.432154	7.76709	14.2555	0.00238757	0.10407
ENSMUSG00000020777	Acox1	-0.35965	9.19552	14.1472	0.00245301	0.104809
ENSMUSG00000028487	Bnc2	-0.583972	3.21414	14.1685	0.00244001	0.104809
ENSMUSG00000024912	Fosl1	-2.16018	1.14731	14.2408	0.00247916	0.104809
ENSMUSG00000030530	Furin	0.295819	7.19348	14.1155	0.00247259	0.104809
ENSMUSG00000095007	Igkv12-41	-6.82024	-0.505969	14.5288	0.00245118	0.104809
ENSMUSG00000041423	Paqr6	1.13439	0.889792	14.1327	0.00246196	0.104809
ENSMUSG00000055485	Soga1	-0.4999	4.48829	14.1799	0.00243302	0.104809
ENSMUSG00000030796	Tead2	0.284282	3.89824	14.0971	0.002484	0.104809
ENSMUSG00000002489	Tiam1	-0.668128	3.66343	14.1192	0.00247031	0.104809
ENSMUSG00000010307	Tmem86a	0.518527	5.86442	14.1144	0.00247329	0.104809
ENSMUSG00000039367	Sec24c	-0.224623	6.89058	14.0618	0.0025061	0.105476
ENSMUSG00000034285	Nipsnap1	0.908796	3.88278	14.2222	0.00251687	0.105665
ENSMUSG00000030528	Blm	0.570554	1.27554	14.0109	0.00253842	0.106303
ENSMUSG00000039568	Ubald1	0.387617	7.20108	13.9964	0.00254766	0.106425
ENSMUSG00000053644	Aldh7a1	-0.244647	6.40499	13.8898	0.00261718	0.108931
ENSMUSG00000041765	Ubac2	0.195493	4.84982	13.8846	0.00262063	0.108931
ENSMUSG00000022184	Fbxo4	-0.387949	4.69496	13.8349	0.0026538	0.109664
ENSMUSG00000043673	Kcns3	-0.586081	5.54995	13.8537	0.00265785	0.109664
ENSMUSG00000020580	Rock2	-0.507466	7.00692	13.8305	0.00265677	0.109664
ENSMUSG00000000532	Acvr1b	-0.30306	5.32662	13.8164	0.00266631	0.109743
ENSMUSG00000030930	Chst15	-0.534393	5.68728	13.7042	0.00274347	0.111838
ENSMUSG00000022744	Cldn25	-0.225156	4.0758	13.6941	0.0027505	0.111838
ENSMUSG00000001138	Cnnm3	0.281501	5.25661	13.7097	0.00273961	0.111838
ENSMUSG00000093930	Hmgcs1	0.74446	7.62569	13.8596	0.0027404	0.111838
ENSMUSG00000019054	Fis1	0.292659	6.79071	13.6664	0.00277006	0.111842
ENSMUSG00000097829	MYADM	-0.441842	4.38854	13.6724	0.00276577	0.111842
ENSMUSG00000026202	Tuba4a	0.626998	4.70826	13.6857	0.00277057	0.111842
ENSMUSG00000020788	Atp2a3	0.524495	6.29942	13.6037	0.00281482	0.113084
ENSMUSG00000021483	Cdk20	0.509389	3.17094	13.5695	0.00283953	0.113776
ENSMUSG00000067786	Nnat	-0.678674	11.3274	13.5612	0.00284558	0.113776
ENSMUSG00000031885	Cbfb	-0.31087	3.90257	13.4997	0.00289093	0.115115
ENSMUSG00000004508	Gab2	0.318503	6.00197	13.4696	0.00291335	0.115115
ENSMUSG00000036892	Prodh2	4.48523	-1.76649	13.482	0.00290412	0.115115
ENSMUSG00000042626	Shc1	-0.233718	6.61659	13.4746	0.00290965	0.115115
ENSMUSG00000020538	Srebf1	-0.429833	8.93792	13.4826	0.00290365	0.115115
ENSMUSG00000000838	Fmr1	0.838864	7.11723	13.7655	0.00292708	0.115386
ENSMUSG00000060681	Slc9a6	-0.469942	4.86497	13.4395	0.00293602	0.115467
ENSMUSG00000039361	Picalm	-0.389394	7.52842	13.4194	0.00295131	0.115798
ENSMUSG00000061130	Ppm1b	-0.297579	6.01761	13.3923	0.00297201	0.116338
ENSMUSG00000028295	Smim8	0.369021	4.27581	13.3147	0.00303225	0.11842
ENSMUSG00000002307	Daxx	-0.298022	5.71052	13.3048	0.00304003	0.118448
ENSMUSG00000037095	Lrg1	-0.795777	8.03384	13.4282	0.00307201	0.119417
ENSMUSG00000035355	Kcnh4	-1.03215	1.62431	13.2478	0.00308541	0.119661
ENSMUSG00000028430	Nol6	-0.374019	7.06642	13.2063	0.00311888	0.120681
ENSMUSG00000042041	2010003K11Rik	-0.433488	4.52891	13.1062	0.00320136	0.123587
ENSMUSG00000037270	4932438A13Rik	0.310594	5.11177	13.0508	0.00324814	0.125105
ENSMUSG00000041132	N4bp2l1	-0.466449	5.39047	13.0336	0.00326278	0.125382
ENSMUSG00000005360	Slc1a3	-0.868855	7.73328	13.2721	0.00328791	0.126059
ENSMUSG00000025854	Fam20c	-0.600299	6.95617	13.0108	0.00333011	0.127386
ENSMUSG00000039886	Tmem120a	-0.518389	8.62727	12.9424	0.00334194	0.127548
ENSMUSG00000025231	Sufu	-0.324182	6.25836	12.9277	0.00335488	0.127752
ENSMUSG00000097139	Gm26626	-1.06465	1.14317	12.8906	0.00338784	0.128715
ENSMUSG00000040111	Gramd1b	1.28598	6.61022	13.5892	0.00340109	0.128927
ENSMUSG00000034158	Lrrc58	0.480392	7.38338	12.8259	0.00344627	0.130345
ENSMUSG00000022307	Oxr1	-0.247896	5.79905	12.813	0.00345804	0.130496
ENSMUSG00000061535	C1qtnf7	0.336051	3.67696	12.7912	0.00347807	0.130665
ENSMUSG00000035105	Egln3	0.534154	2.4167	12.7995	0.00347046	0.130665
ENSMUSG00000016239	Lonrf3	1.49702	-0.461461	12.7404	0.00352522	0.13185
ENSMUSG00000050276	Mrgprg	3.06964	-0.530122	12.7356	0.00352972	0.13185
ENSMUSG00000056427	Slit3	0.294038	7.535	12.7319	0.00353316	0.13185
ENSMUSG00000024143	Rhoq	-0.535172	6.73229	12.7305	0.00354521	0.132006
ENSMUSG00000047875	Gpr157	-0.459687	3.71412	12.6557	0.00360555	0.13249
ENSMUSG00000019528	Gyg	0.414955	6.33365	12.6636	0.00359797	0.13249
ENSMUSG00000027223	Mapk8ip1	0.432686	5.66049	12.6668	0.00359491	0.13249
ENSMUSG00000032038	St3gal4	-0.532952	5.07716	12.6793	0.00358302	0.13249
ENSMUSG00000031711	Zfp330	-0.251194	4.58538	12.6685	0.00359325	0.13249
ENSMUSG00000056592	Zfp658	0.529466	2.41523	12.6812	0.00358117	0.13249
ENSMUSG00000028041	Adam15	-0.245987	8.71245	12.6103	0.0036495	0.133485
ENSMUSG00000024039	Cbs	1.2884	3.74494	13.0438	0.00365131	0.133485
ENSMUSG00000035385	Ccl2	-1.27571	3.31434	12.8797	0.00367236	0.133485
ENSMUSG00000002329	Mdp1	0.379792	5.58522	12.5948	0.00366462	0.133485
ENSMUSG00000059248	Sept9	0.620401	7.03437	12.6765	0.00366607	0.133485
ENSMUSG00000032083	Apoa1	2.83936	0.819725	12.8336	0.00369293	0.1338
ENSMUSG00000041696	Rasl12	-0.800965	5.33049	12.8246	0.00369696	0.1338
ENSMUSG00000026896	Ifih1	-0.438166	4.37671	12.5199	0.00373886	0.135025
ENSMUSG00000017897	Eya2	0.656334	4.16836	12.5174	0.00375865	0.135449
ENSMUSG00000030966	Trim21	-0.378471	3.29882	12.486	0.00377302	0.135675
ENSMUSG00000035275	Raver2	-0.411913	5.05085	12.4682	0.00379113	0.136035
ENSMUSG00000039629	Strip2	-0.689229	2.28173	12.4186	0.00384203	0.137568
ENSMUSG00000037225	Fgf2	-0.842264	5.74697	12.7317	0.00385922	0.137615
ENSMUSG00000042308	Setd1a	-0.313314	4.9914	12.4015	0.00385973	0.137615
ENSMUSG00000042348	Arl15	0.275471	3.76803	12.2949	0.00397258	0.140721
ENSMUSG00000057729	Prtn3	-0.732979	3.07379	12.3079	0.00395854	0.140721
ENSMUSG00000038068	Rnf144b	-0.49543	5.29546	12.3029	0.00396396	0.140721
ENSMUSG00000025006	Sorbs1	-0.569388	8.36018	12.2876	0.00398037	0.140721
ENSMUSG00000036620	Mgat4b	-0.2185	7.2637	12.2485	0.00402285	0.141626
ENSMUSG00000021922	Itih4	-1.1891	2.20407	12.2309	0.00404214	0.141767
ENSMUSG00000045392	Olfr1033	-1.05332	1.13763	12.2294	0.00404374	0.141767
ENSMUSG00000057982	Zfp809	-0.469712	4.52887	12.2195	0.00405462	0.141853
ENSMUSG00000026519	Tmem63a	0.353539	5.5111	12.1752	0.0041038	0.143275
ENSMUSG00000036596	Cpz	0.639012	3.50559	12.1674	0.00411253	0.143282
ENSMUSG00000078952	Gm2373	-1.26778	-0.813981	12.1401	0.00414326	0.144053
ENSMUSG00000031613	Hpgd	-0.766914	5.17983	12.3263	0.00417404	0.144251
ENSMUSG00000024913	Lrp5	0.304018	7.81254	12.1102	0.00417711	0.144251
ENSMUSG00000016664	Pacsin2	-0.223957	6.86536	12.1048	0.00418332	0.144251
ENSMUSG00000026387	Sctr	0.672782	3.67196	12.1217	0.00416402	0.144251
ENSMUSG00000034842	Art3	-0.386359	8.25289	12.0898	0.00420049	0.144494
ENSMUSG00000006611	Hfe	-0.458717	6.95333	12.0762	0.00421615	0.144494
ENSMUSG00000050148	Ubqln2	-0.331594	6.0356	12.0834	0.00420785	0.144494
ENSMUSG00000056267	Cep70	-0.439203	3.78835	12.0556	0.00423991	0.144702
ENSMUSG00000038515	Grtp1	0.73604	4.33794	12.1777	0.00423872	0.144702
ENSMUSG00000004591	Pkn2	-0.255693	5.11689	12.0486	0.00424809	0.144702
ENSMUSG00000039450	Dcxr	0.259959	5.07964	12.0318	0.00426764	0.145074
ENSMUSG00000021589	Rhobtb3	0.537523	1.91072	11.9724	0.00433776	0.14716
ENSMUSG00000007122	Casq1	-0.994169	0.4213	11.9384	0.00437856	0.148197
ENSMUSG00000044465	Fam160a2	-0.220574	5.32841	11.9322	0.00438598	0.148197
ENSMUSG00000043079	Synpo	-0.251809	5.74746	11.9147	0.00440719	0.148316
ENSMUSG00000046962	Zbtb21	-0.242528	4.05132	11.9203	0.00440041	0.148316
ENSMUSG00000037406	Htra4	-0.770895	1.73948	11.8995	0.00442564	0.148639
ENSMUSG00000022947	Cbr3	-0.550646	3.71744	11.8632	0.00447026	0.148652
ENSMUSG00000004187	Kifc2	0.25958	4.59891	11.8668	0.00446583	0.148652
ENSMUSG00000000753	Serpinf1	0.442498	7.97425	11.8811	0.00444817	0.148652
ENSMUSG00000045973	Slc25a51	-0.334091	6.43132	11.8712	0.0044604	0.148652
ENSMUSG00000020484	Xbp1	-0.57702	7.68786	11.8848	0.00445361	0.148652
ENSMUSG00000031217	Efnb1	0.360595	6.43484	11.8415	0.00449709	0.148661
ENSMUSG00000036053	Fmnl2	-0.42491	3.52391	11.8446	0.00449327	0.148661
ENSMUSG00000043463	Rab9b	-1.50738	0.184998	11.8506	0.00448579	0.148661
ENSMUSG00000015850	Adamtsl4	-0.302565	5.88685	11.8132	0.00453246	0.149036
ENSMUSG00000022425	Enpp2	-0.371942	8.07489	11.8111	0.00453506	0.149036
ENSMUSG00000035473	Galm	-0.276386	5.914	11.8138	0.00453174	0.149036
ENSMUSG00000001348	Acp5	-0.661077	8.5104	11.7574	0.00462706	0.149715
ENSMUSG00000023087	Ccrn4l	0.614734	5.43972	11.8341	0.00462194	0.149715
ENSMUSG00000036136	Fam110c	0.559744	3.53956	11.7479	0.00461523	0.149715
ENSMUSG00000056493	Foxk1	-0.230694	5.86108	11.7613	0.00459809	0.149715
ENSMUSG00000036073	Galt	0.266726	4.71053	11.7432	0.00462121	0.149715
ENSMUSG00000013033	Lphn1	0.278405	5.35302	11.7389	0.00462676	0.149715
ENSMUSG00000039911	Spsb1	-0.47217	5.64211	11.7568	0.00460381	0.149715
ENSMUSG00000041143	Tmco4	-0.296892	4.37346	11.755	0.00460616	0.149715
ENSMUSG00000032737	Inppl1	-0.190936	7.19362	11.7275	0.00464144	0.149892
ENSMUSG00000001473	Tubb6	-0.440849	5.43127	11.7133	0.00465981	0.149908
ENSMUSG00000070604	Vsig10l	-0.394319	3.96356	11.7134	0.0046597	0.149908
ENSMUSG00000024302	Dtna	-0.403916	3.48344	11.6579	0.0047322	0.151946
ENSMUSG00000029095	Ablim2	-0.368965	5.3051	11.5856	0.00482866	0.152899
ENSMUSG00000033576	Apol6	-0.514982	9.13031	11.6219	0.00478	0.152899
ENSMUSG00000030161	Gabarapl1	-0.251765	8.21742	11.5856	0.00482869	0.152899
ENSMUSG00000090235	Gm16244	0.975376	0.0162068	11.6102	0.00479552	0.152899
ENSMUSG00000045569	Mc2r	0.767639	5.6441	11.8311	0.00483471	0.152899
ENSMUSG00000055660	Mettl4	-0.643038	0.941128	11.5928	0.00481892	0.152899
ENSMUSG00000002733	Plekha3	-0.21693	5.25705	11.5926	0.00481925	0.152899
ENSMUSG00000032280	Tle3	-0.331702	7.45619	11.5939	0.00481747	0.152899
ENSMUSG00000034361	Cpne2	0.371606	7.11971	11.553	0.00487293	0.152974
ENSMUSG00000029547	Ints1	-0.336471	5.79165	11.5706	0.00484898	0.152974
ENSMUSG00000031880	Rrad	0.652505	2.10904	11.56	0.00486344	0.152974
ENSMUSG00000042333	Tnfrsf14	-0.7036	1.10113	11.5526	0.00487352	0.152974
ENSMUSG00000039103	Nexn	0.38001	4.11834	11.5354	0.00489703	0.153425
ENSMUSG00000028496	Mllt3	-0.376713	3.90844	11.4869	0.00496412	0.155237
ENSMUSG00000028273	Pdlim5	-0.242741	5.25272	11.4663	0.00499291	0.155847
ENSMUSG00000000275	Trim25	-0.271711	5.16024	11.4595	0.00500242	0.155855
ENSMUSG00000071649	B3gat3	0.237158	6.0036	11.4524	0.00501253	0.15588
ENSMUSG00000097537	2610020C07Rik	2.49471	-1.56646	11.4198	0.00505862	0.156958
ENSMUSG00000029659	Medag	-0.635287	4.33526	11.4519	0.00506586	0.156958
ENSMUSG00000012640	Zfp715	-0.409492	3.19006	11.4059	0.00507861	0.157063
ENSMUSG00000035069	Oma1	-0.287327	4.21163	11.3968	0.00509159	0.157175
ENSMUSG00000066026	Dhrs3	0.38394	8.31705	11.387	0.00510574	0.157322
ENSMUSG00000041915	Ammecr1l	-0.186805	4.80799	11.3527	0.00515544	0.157706
ENSMUSG00000029622	Arpc1b	-0.257164	7.80034	11.355	0.00515207	0.157706
ENSMUSG00000022469	Rapgef3	-0.253837	6.829	11.365	0.00513756	0.157706
ENSMUSG00000035713	Usp35	-0.4121	5.26256	11.3525	0.00515576	0.157706
ENSMUSG00000029403	Cdkl2	-0.384934	3.6023	11.3259	0.00519461	0.158318
ENSMUSG00000042622	Maff	-0.688687	3.58326	11.3289	0.00519016	0.158318
ENSMUSG00000032715	Trib3	0.552137	2.83604	11.314	0.00521214	0.158564
ENSMUSG00000031343	Gabra3	0.518337	3.01751	11.2391	0.00532404	0.160514
ENSMUSG00000005413	Hmox1	-0.455267	5.34	11.2478	0.00531091	0.160514
ENSMUSG00000027276	Jag1	-0.228517	5.21745	11.2454	0.00531462	0.160514
ENSMUSG00000032419	Tbx18	-0.831568	1.47426	11.2531	0.00530291	0.160514
ENSMUSG00000037257	Aagab	0.259514	5.84073	11.2174	0.00535708	0.161066
ENSMUSG00000020696	Rffl	-0.370688	4.39325	11.2144	0.00536152	0.161066
ENSMUSG00000031530	Dusp4	-0.594429	4.89256	11.2479	0.00537578	0.161206
ENSMUSG00000020806	Rhbdf2	-0.270509	4.43539	11.1656	0.00543659	0.162739
ENSMUSG00000057963	Itpk1	0.787231	6.7776	11.4265	0.00544749	0.162775
ENSMUSG00000031959	Wdr59	-0.249472	3.62646	11.1074	0.00552774	0.16488
ENSMUSG00000052934	Fbxo31	-0.205501	5.86841	11.0782	0.00557411	0.165968
ENSMUSG00000028405	Aco1	-0.386132	8.08792	11.0567	0.00560853	0.166697
ENSMUSG00000029190	D5Ertd579e	0.306098	6.41789	11.0374	0.00563961	0.166894
ENSMUSG00000020248	Nfyb	0.274821	4.02377	11.0443	0.00562847	0.166894
ENSMUSG00000025137	Pcyt2	-0.248726	6.08446	11.0341	0.00564497	0.166894
ENSMUSG00000038058	Nod1	-0.275448	5.61735	11.0212	0.0056659	0.167219
ENSMUSG00000026883	Dab2ip	-0.333478	7.8745	11.0049	0.00569247	0.167636
ENSMUSG00000020963	Tshr	0.484614	7.86293	11.0003	0.0057	0.167636
ENSMUSG00000022742	Cpox	-0.335108	3.72077	10.9879	0.0057204	0.167649
ENSMUSG00000037885	Stk35	-0.239182	4.81505	10.9907	0.00571588	0.167649
ENSMUSG00000031209	Heph	-0.455265	6.03399	10.9497	0.00578371	0.168657
ENSMUSG00000096833	Igkv4-55	-6.69437	-0.0375877	11.4103	0.00578494	0.168657
ENSMUSG00000022906	Parp9	0.466208	6.29828	10.9574	0.00577088	0.168657
ENSMUSG00000034295	Fhod3	1.12952	2.97148	11.0084	0.00588473	0.171269
ENSMUSG00000022385	Gtse1	-0.725862	0.832216	10.8797	0.00590168	0.171465
ENSMUSG00000026077	Npas2	2.11823	2.42393	11.2425	0.00595635	0.172457
ENSMUSG00000055447	Cd47	-0.274042	5.96621	10.8374	0.00597437	0.172681
ENSMUSG00000036961	Wnt8b	-1.42417	-1.15869	10.8267	0.00599293	0.17292
ENSMUSG00000058022	Adtrp	-0.486466	2.72337	10.817	0.00600985	0.17311
ENSMUSG00000012187	Mogat1	-0.570488	4.86034	10.8234	0.00605069	0.173988
ENSMUSG00000045327	6330549D23Rik	0.795494	-0.109106	10.7586	0.00611249	0.174274
ENSMUSG00000024981	Acsl5	-0.234977	6.12832	10.7702	0.00609197	0.174274
ENSMUSG00000045975	C2cd2	-0.29172	5.28435	10.7694	0.00609341	0.174274
ENSMUSG00000020108	Ddit4	0.584097	5.58673	10.849	0.00609874	0.174274
ENSMUSG00000050552	Lamtor4	0.3811	6.11883	10.7607	0.00610873	0.174274
ENSMUSG00000041920	Slc16a6	-0.547928	3.20487	10.7424	0.00614131	0.174798
ENSMUSG00000060560	Ces4a	-2.31602	-1.56548	10.6888	0.00623812	0.176358
ENSMUSG00000054966	Ifltd1	-0.552366	2.46775	10.6908	0.00623441	0.176358
ENSMUSG00000006412	Pfdn2	0.245048	5.50856	10.6965	0.00622411	0.176358
ENSMUSG00000022180	Slc7a8	0.603976	5.38242	10.7632	0.00625868	0.176642
ENSMUSG00000028412	Slc44a1	0.200878	5.88192	10.66	0.00629075	0.177249
ENSMUSG00000021585	Cast	-0.371972	7.24945	10.6108	0.00638181	0.179514
ENSMUSG00000026944	Abca2	-0.265398	6.63727	10.5595	0.00647854	0.17959
ENSMUSG00000068250	Amn1	-0.406059	3.29048	10.6003	0.00640145	0.17959
ENSMUSG00000062444	Ap3b2	-0.784056	0.882098	10.5817	0.00643656	0.17959
ENSMUSG00000022031	Elp3	-0.254846	5.92812	10.5594	0.0064787	0.17959
ENSMUSG00000020605	Hs1bp3	-0.189685	5.47853	10.5917	0.00641771	0.17959
ENSMUSG00000027665	Pik3ca	-0.253199	5.5216	10.5527	0.00649146	0.17959
ENSMUSG00000026586	Prrx1	-0.363915	4.19186	10.5567	0.006484	0.17959
ENSMUSG00000074743	Thbd	-0.55656	7.89693	10.5627	0.00648302	0.17959
ENSMUSG00000056498	Tmem154	-0.640553	2.08927	10.5672	0.00646397	0.17959
ENSMUSG00000055633	Zfp580	0.319082	4.14153	10.5585	0.00648051	0.17959
ENSMUSG00000061414	Efcab4b	0.731747	0.880564	10.5411	0.00651363	0.179907
ENSMUSG00000022663	Atg3	0.315846	6.50982	10.5234	0.00654769	0.180551
ENSMUSG00000021185	9030617O03Rik	-0.351887	4.79802	10.5011	0.00659075	0.181143
[truncated: 15,328 more rows]

## Sheet: Fig3D_Venn_DEGs
DEGs_AdipoqCre_only	DEGs_both	DEGs_gKO_only
Kcnj15	Osgin1	Tmem38b
[truncated: 4,036 more rows]

## Sheet: Fig3E_ReactomePA_intersect_DEGs
ID	Description	GeneRatio	BgRatio	pvalue	p.adjust	qvalue	geneID	Count
[truncated: 10 more rows]
