# Supplementary material for: Adipocyte NR1D1 dictates adipose tissue expansion during obesity
Source: eLife. 2021 Aug 5;10:e63324. doi: 10.7554/eLife.63324 (PMC8360653; doi:10.7554/eLife.63324)
Supplement: Figure 5—source data 1. [file elife-63324-fig5-data1.xlsx]

## Sheet: Fig5A_edgeR_Cre-HFDvsNC_sigUP
GENEID	SYMBOL
ENSMUSG00000035540	Gc
ENSMUSG00000037798	Mat1a
ENSMUSG00000020609	Apob
ENSMUSG00000032083	Apoa1
ENSMUSG00000028715	Cyp4a14
ENSMUSG00000059908	Mug1
ENSMUSG00000069922	Ces3a
ENSMUSG00000032080	Apoa4
ENSMUSG00000027249	F2
ENSMUSG00000054422	Fabp1
ENSMUSG00000066072	Cyp4a10
ENSMUSG00000028001	Fga
ENSMUSG00000061808	Ttr
ENSMUSG00000056035	Cyp3a11
ENSMUSG00000092009	Myh15
ENSMUSG00000056758	Hmga2
ENSMUSG00000022875	Kng1
ENSMUSG00000033860	Fgg
ENSMUSG00000074768	Bhmt
ENSMUSG00000079015	Serpina1c
ENSMUSG00000028307	Aldob
ENSMUSG00000037780	Mbl1
ENSMUSG00000029304	Spp1
ENSMUSG00000079049	Serpinb1c
ENSMUSG00000028186	Uox
ENSMUSG00000030359	Pzp
ENSMUSG00000097083	D930019O06Rik
ENSMUSG00000070366	Ppapdc1a
ENSMUSG00000028825	Rhd
ENSMUSG00000052485	Tmem171
ENSMUSG00000092517	Art2a-ps
ENSMUSG00000026228	Htr2b
ENSMUSG00000084890	A830036E02Rik
ENSMUSG00000074505	Fat3
ENSMUSG00000029158	Yipf7
ENSMUSG00000049719	Prss46
ENSMUSG00000059481	Plg
ENSMUSG00000028356	Ambp
ENSMUSG00000069805	Fbp1
ENSMUSG00000037053	Azgp1
ENSMUSG00000035183	Slc24a5
ENSMUSG00000085081	A430071A18Rik
ENSMUSG00000025582	Nptx1
ENSMUSG00000034226	Rhov
ENSMUSG00000091055	Siglec15
ENSMUSG00000027359	Slc27a2
ENSMUSG00000005681	Apoa2
ENSMUSG00000094797	Igkv6-15
ENSMUSG00000033634	Cml2
ENSMUSG00000029816	Gpnmb
ENSMUSG00000090675	Olfr111
ENSMUSG00000036086	Zranb3
ENSMUSG00000000049	Apoh
ENSMUSG00000085295	4930430E12Rik
ENSMUSG00000056071	S100a9
ENSMUSG00000074973	Gm11382
ENSMUSG00000096459	Ighv9-3
ENSMUSG00000039092	Sptlc3
ENSMUSG00000024806	Mlana
ENSMUSG00000030895	Hpx
ENSMUSG00000031438	Rnf128
ENSMUSG00000038754	Elovl3
ENSMUSG00000023070	Rgn
ENSMUSG00000079625	Tm4sf19
ENSMUSG00000059049	Frem1
ENSMUSG00000070369	Itgad
ENSMUSG00000041552	Ptchd1
ENSMUSG00000028238	Atp6v0d2
ENSMUSG00000095210	Ighv5-9-1
ENSMUSG00000028459	Cd72
ENSMUSG00000037482	Erv3
ENSMUSG00000027022	Xirp2
ENSMUSG00000093896	Ighv1-76
ENSMUSG00000073274	Gm14636
ENSMUSG00000030117	Gdf3
ENSMUSG00000032262	Elovl4
ENSMUSG00000029377	Ereg
ENSMUSG00000054510	Gm14461
ENSMUSG00000025991	Cps1
ENSMUSG00000045912	C2cd4c
ENSMUSG00000011154	1700026D08Rik
ENSMUSG00000072601	Ear1
ENSMUSG00000097111	Gm26589
ENSMUSG00000026358	Rgs1
ENSMUSG00000020051	Pah
ENSMUSG00000043613	Mmp3
ENSMUSG00000023992	Trem2
ENSMUSG00000063779	Chi3l4
ENSMUSG00000051048	P4ha3
ENSMUSG00000027398	Il1b
ENSMUSG00000047904	Sstr2
ENSMUSG00000029189	Sel1l3
ENSMUSG00000029814	Igf2bp3
ENSMUSG00000031098	Syt8
ENSMUSG00000050967	Creg2
ENSMUSG00000029819	Npy
ENSMUSG00000047495	Dlgap2
ENSMUSG00000031710	Ucp1
ENSMUSG00000056888	Glipr1
ENSMUSG00000073242	Gm10485
ENSMUSG00000030077	Chl1
ENSMUSG00000027068	Dhrs9
ENSMUSG00000033777	Tlr13
ENSMUSG00000093388	Gm22655
ENSMUSG00000033740	St18
ENSMUSG00000032122	Slc37a2
ENSMUSG00000030789	Itgax
ENSMUSG00000024598	Fbn2
ENSMUSG00000000982	Ccl3
ENSMUSG00000025473	Adam8
ENSMUSG00000017767	Spata25
ENSMUSG00000084932	Gm15156
ENSMUSG00000029919	Hpgds
ENSMUSG00000003882	Il7r
ENSMUSG00000057465	Saa2
ENSMUSG00000046323	Dppa3
ENSMUSG00000001334	Fndc5
ENSMUSG00000035448	Ccr3
ENSMUSG00000022868	Ahsg
ENSMUSG00000059089	Fcgr4
ENSMUSG00000020598	Nrcam
ENSMUSG00000094117	Igkv3-12
ENSMUSG00000021403	Serpinb9b
ENSMUSG00000086109	Gm13391
ENSMUSG00000026874	Hc
ENSMUSG00000028327	1300002K09Rik
ENSMUSG00000026023	Cdk15
ENSMUSG00000029254	Stap1
ENSMUSG00000026442	Nfasc
ENSMUSG00000089929	Bcl2a1b
ENSMUSG00000027386	Fbln7
ENSMUSG00000046593	Tmem215
ENSMUSG00000022494	Shisa9
ENSMUSG00000030142	Clec4e
ENSMUSG00000050445	Cyp8b1
ENSMUSG00000032076	Cadm1
ENSMUSG00000040314	Ctsg
ENSMUSG00000051435	Fhad1
ENSMUSG00000027737	Slc7a11
ENSMUSG00000049723	Mmp12
ENSMUSG00000096960	A230028O05Rik
ENSMUSG00000001131	Timp1
ENSMUSG00000024737	Slc15a3
ENSMUSG00000005716	Pvalb
ENSMUSG00000058952	Cfi
ENSMUSG00000078780	Gm5150
ENSMUSG00000026628	Atf3
ENSMUSG00000014602	Kif1a
ENSMUSG00000036949	Slc39a12
ENSMUSG00000030329	Pianp
ENSMUSG00000026981	Il1rn
ENSMUSG00000051029	Serpinb1b
ENSMUSG00000018930	Ccl4
ENSMUSG00000024672	Ms4a7
ENSMUSG00000066510	Ankdd1a
ENSMUSG00000037280	Galnt6
ENSMUSG00000026715	Serpinc1
ENSMUSG00000015112	Slc25a13
ENSMUSG00000016239	Lonrf3
ENSMUSG00000038370	Pcp4l1
ENSMUSG00000031849	Comp
ENSMUSG00000019876	Pkib
ENSMUSG00000087282	Gm15317
ENSMUSG00000040552	C3ar1
ENSMUSG00000044164	Rnf182
ENSMUSG00000053063	Clec12a
ENSMUSG00000021451	Sema4d
ENSMUSG00000031138	F9
ENSMUSG00000058427	Cxcl2
ENSMUSG00000059956	Serpinb12
ENSMUSG00000036526	Card11
ENSMUSG00000035186	Ubd
ENSMUSG00000026437	Cdk18
ENSMUSG00000024365	Cyp21a1
ENSMUSG00000076525	Igkv1-99
ENSMUSG00000028785	Hpca
ENSMUSG00000090054	Gm15629
ENSMUSG00000001510	Dlx3
ENSMUSG00000074109	Mrgprx2
ENSMUSG00000027698	Nceh1
ENSMUSG00000028111	Ctsk
ENSMUSG00000040522	Tlr8
ENSMUSG00000026220	Slc16a14
ENSMUSG00000018774	Cd68
ENSMUSG00000090125	Pou3f1
ENSMUSG00000089722	Gm11711
ENSMUSG00000033825	Tpsb2
ENSMUSG00000055541	Lair1
ENSMUSG00000045551	Fpr1
ENSMUSG00000001865	Cpa3
ENSMUSG00000025017	Pik3ap1
ENSMUSG00000042498	D330045A20Rik
ENSMUSG00000025877	Hk3
ENSMUSG00000049598	Vsig8
ENSMUSG00000066154	Mup3
ENSMUSG00000022225	Cma1
ENSMUSG00000073492	Gm10521
ENSMUSG00000028463	Car9
ENSMUSG00000021095	Gsc
ENSMUSG00000019987	Arg1
ENSMUSG00000061578	Ksr2
ENSMUSG00000071324	Armc2
ENSMUSG00000021624	Cd180
ENSMUSG00000069607	Cd300lh
ENSMUSG00000004730	Emr1
ENSMUSG00000024173	Tpsab1
ENSMUSG00000014686	Ceacam16
ENSMUSG00000015947	Fcgr1
ENSMUSG00000038147	Cd84
ENSMUSG00000031886	Ces2e
ENSMUSG00000022148	Fyb
ENSMUSG00000086150	BC024582
ENSMUSG00000044811	AF251705
ENSMUSG00000050578	Mmp13
ENSMUSG00000025128	Bhlhe22
ENSMUSG00000007594	Hapln4
ENSMUSG00000030162	Olr1
ENSMUSG00000054932	Afp
ENSMUSG00000032220	Myo1e
ENSMUSG00000026204	Ptprn
ENSMUSG00000038642	Ctss
ENSMUSG00000032081	Apoc3
ENSMUSG00000061068	Mcpt4
ENSMUSG00000030144	Clec4d
ENSMUSG00000074115	Saa1
ENSMUSG00000022303	Dcstamp
ENSMUSG00000020399	Havcr2
ENSMUSG00000085069	Gm13111
ENSMUSG00000032496	Ltf
ENSMUSG00000025044	Msr1
ENSMUSG00000032530	Lyzl4
ENSMUSG00000017417	Plxdc1
ENSMUSG00000093838	Ighv3-1
ENSMUSG00000040751	Lat2
ENSMUSG00000037868	Egr2
ENSMUSG00000040046	Tph1
ENSMUSG00000046805	Mpeg1
ENSMUSG00000009654	Oit3
ENSMUSG00000005339	Fcer1a
ENSMUSG00000003283	Hck
ENSMUSG00000023993	Treml1
ENSMUSG00000052026	Slc6a7
ENSMUSG00000098320	VIS1
ENSMUSG00000061132	Blnk
ENSMUSG00000024770	Lipn
ENSMUSG00000016349	Eef1a2
ENSMUSG00000071178	Serpina1b
ENSMUSG00000024300	Myo1f
ENSMUSG00000079227	Ccr5
ENSMUSG00000006764	Tph2
ENSMUSG00000063193	Cd300lb
ENSMUSG00000030047	Arhgap25
ENSMUSG00000041842	Fhdc1
ENSMUSG00000027761	Aadac
ENSMUSG00000022415	Syngr1
ENSMUSG00000060131	Atp8b4
ENSMUSG00000034652	Cd300a
ENSMUSG00000040133	Gpr176
ENSMUSG00000090230	Gm16315
ENSMUSG00000021998	Lcp1
ENSMUSG00000035041	Creb3l3
ENSMUSG00000074677	Sirpb1c
ENSMUSG00000096464	Ighv2-2
ENSMUSG00000074802	Gas2l3
ENSMUSG00000027408	Cpxm1
ENSMUSG00000098055	Gm26947
ENSMUSG00000022488	Nckap1l
ENSMUSG00000037341	Slc9a7
ENSMUSG00000030579	Tyrobp
ENSMUSG00000052270	Fpr2
ENSMUSG00000016283	H2-M2
ENSMUSG00000045763	Basp1
ENSMUSG00000070547	Mrgprb1
ENSMUSG00000047746	Fbxo40
ENSMUSG00000044827	Tlr1
ENSMUSG00000039062	Anpep
ENSMUSG00000079293	Clec7a
ENSMUSG00000011148	Adssl1
ENSMUSG00000091387	Gcnt4
ENSMUSG00000031443	F7
ENSMUSG00000028197	Col24a1
ENSMUSG00000073568	Arl14epl
ENSMUSG00000021886	Gpr65
ENSMUSG00000034883	Lrr1
ENSMUSG00000039774	Galnt12
ENSMUSG00000097816	Gm26811
ENSMUSG00000024679	Ms4a6d
ENSMUSG00000065599	Mir23b
ENSMUSG00000005800	Mmp8
ENSMUSG00000054342	Kcnn4
ENSMUSG00000025154	Arhgap19
ENSMUSG00000056399	Prss34
ENSMUSG00000020120	Plek
ENSMUSG00000051107	Gm15440
ENSMUSG00000089809	A930011G23Rik
ENSMUSG00000043740	B430306N03Rik
ENSMUSG00000004933	Matk
ENSMUSG00000029602	Rasal1
ENSMUSG00000043157	Arl11
ENSMUSG00000000031	H19
ENSMUSG00000025574	Tk1
ENSMUSG00000081665	Gm15922
ENSMUSG00000022667	Cd200r1
ENSMUSG00000018341	Il12rb2
ENSMUSG00000068696	Gpr88
ENSMUSG00000050425	Mrgprb2
ENSMUSG00000081723	Gm15931
ENSMUSG00000027748	Trpc4
ENSMUSG00000050335	Lgals3
ENSMUSG00000089647	Gm2245
ENSMUSG00000028278	Rragd
ENSMUSG00000062082	Cd200r4
ENSMUSG00000027379	Bub1
ENSMUSG00000049130	C5ar1
ENSMUSG00000041827	Oasl1
ENSMUSG00000026065	Slc9a4
ENSMUSG00000085448	Gm13963
ENSMUSG00000053687	Dpep2
ENSMUSG00000047298	Kcnv2
ENSMUSG00000038508	Gdf15
ENSMUSG00000052688	5430435G22Rik
ENSMUSG00000024696	Lpxn
ENSMUSG00000048216	Gpr85
ENSMUSG00000049848	Ceacam19
ENSMUSG00000085184	4933439K11Rik
ENSMUSG00000072844	G530011O06Rik
ENSMUSG00000045903	Npas4
ENSMUSG00000040528	Milr1
ENSMUSG00000056737	Capg
ENSMUSG00000045065	9930022D16Rik
ENSMUSG00000037254	Itih2
ENSMUSG00000040026	Saa3
ENSMUSG00000040613	Apobec1
ENSMUSG00000026600	Soat1
ENSMUSG00000034641	Cd300ld
ENSMUSG00000032783	Troap
ENSMUSG00000049871	Nlrc3
ENSMUSG00000058755	Osm
ENSMUSG00000032661	Oas3
ENSMUSG00000022408	Fam83f
ENSMUSG00000038179	Slamf7
ENSMUSG00000035004	Igsf6
ENSMUSG00000006522	Itih3
ENSMUSG00000005045	Chd5
ENSMUSG00000098050	Gm5345
ENSMUSG00000027239	Mdk
ENSMUSG00000044162	Tnip3
ENSMUSG00000095788	Sirpb1a
ENSMUSG00000030785	Cox6a2
ENSMUSG00000021262	Evl
ENSMUSG00000034116	Vav1
ENSMUSG00000074361	C5ar2
ENSMUSG00000017400	Stac2
ENSMUSG00000035459	Stab2
ENSMUSG00000000290	Itgb2
ENSMUSG00000056380	Gpr50
ENSMUSG00000004707	Ly9
ENSMUSG00000020901	Pik3r5
ENSMUSG00000021190	Lgmn
ENSMUSG00000016529	Il10
ENSMUSG00000097142	Gm26778
ENSMUSG00000085058	8030453O22Rik
ENSMUSG00000064065	Ipcef1
ENSMUSG00000032355	Mlip
ENSMUSG00000020658	Efr3b
ENSMUSG00000087352	Gm12999
ENSMUSG00000075707	Dio3
ENSMUSG00000031262	Cenpi
ENSMUSG00000080115	Mettl21b
ENSMUSG00000037636	Slc25a43
ENSMUSG00000028678	Kif2c
ENSMUSG00000075027	4631405J19Rik
ENSMUSG00000049988	Lrrc25
ENSMUSG00000031898	Dpep3
ENSMUSG00000011008	Mcoln2
ENSMUSG00000015968	Cacna1d
ENSMUSG00000049985	Ankrd55
ENSMUSG00000017146	Brca1
ENSMUSG00000078249	Hmga1-rs1
ENSMUSG00000058818	Pirb
ENSMUSG00000072621	Slfn10-ps
ENSMUSG00000048621	Gm6377
ENSMUSG00000054702	Ap1s3
ENSMUSG00000020330	Hmmr
ENSMUSG00000015396	Cd83
ENSMUSG00000020143	Dock2
ENSMUSG00000024781	Lipa
ENSMUSG00000032174	Icam5
ENSMUSG00000029925	Tbxas1
ENSMUSG00000026360	Rgs2
ENSMUSG00000091175	9130204L05Rik
ENSMUSG00000097224	Gm26716
ENSMUSG00000000202	Btbd17
ENSMUSG00000051596	Otop1
ENSMUSG00000039748	Exo1
ENSMUSG00000044042	Fmn1
ENSMUSG00000002111	Spi1
ENSMUSG00000015854	Cd5l
ENSMUSG00000047592	Nxpe5
ENSMUSG00000074622	Mafb
ENSMUSG00000048779	P2ry6
ENSMUSG00000018008	Cyth4
ENSMUSG00000022033	Pbk
ENSMUSG00000026601	Axdnd1
ENSMUSG00000062184	Hs6st2
ENSMUSG00000036330	Slc18a1
ENSMUSG00000026357	Rgs18
ENSMUSG00000026321	Tnfrsf11a
ENSMUSG00000040373	Cacng5
ENSMUSG00000029322	Plac8
ENSMUSG00000026077	Npas2
ENSMUSG00000027956	Tmem144
ENSMUSG00000054293	A630033H20Rik
ENSMUSG00000032323	Cyp11a1
ENSMUSG00000031740	Mmp2
ENSMUSG00000072812	Ahnak2
ENSMUSG00000024965	Fermt3
ENSMUSG00000045404	Kcnk13
ENSMUSG00000087263	Gm15726
ENSMUSG00000046711	Hmga1
ENSMUSG00000030774	Pak1
ENSMUSG00000031838	Ifi30
ENSMUSG00000042476	Abcb4
ENSMUSG00000039476	Prrx2
ENSMUSG00000056054	S100a8
ENSMUSG00000054520	Sh3bp2
ENSMUSG00000036905	C1qb
ENSMUSG00000040747	Cd53
ENSMUSG00000020256	Aldh1l2
ENSMUSG00000037946	Fgd3
ENSMUSG00000017716	Birc5
ENSMUSG00000030523	Trpm1
ENSMUSG00000070354	Gm21975
ENSMUSG00000097694	G730013B05Rik
ENSMUSG00000085152	Gm11496
ENSMUSG00000022322	Shcbp1
ENSMUSG00000031827	Cotl1
ENSMUSG00000059498	Fcgr3
ENSMUSG00000078771	Evi2a
ENSMUSG00000031659	Adcy7
ENSMUSG00000015880	Ncapg
ENSMUSG00000021702	Thbs4
ENSMUSG00000066861	Oas1g
ENSMUSG00000023940	Sgol1
ENSMUSG00000003363	Pld3
ENSMUSG00000062585	Cnr2
ENSMUSG00000097134	1110002J07Rik
ENSMUSG00000034854	Mfsd12
ENSMUSG00000095028	Sirpb1b
ENSMUSG00000025094	Slc18a2
ENSMUSG00000031266	Gla
ENSMUSG00000033207	Mamdc2
ENSMUSG00000038379	Ttk
ENSMUSG00000037902	Sirpa
ENSMUSG00000020042	Btbd11
ENSMUSG00000021250	Fos
ENSMUSG00000035455	Fignl1
ENSMUSG00000075334	Rprm
ENSMUSG00000024124	Prss30
ENSMUSG00000006519	Cyba
ENSMUSG00000053318	Slamf8
ENSMUSG00000030206	Gsg1
ENSMUSG00000063646	Jakmip1
ENSMUSG00000087052	Gm8093
ENSMUSG00000013707	Tnfaip8l2
ENSMUSG00000039057	Myo16
ENSMUSG00000097352	C920009B18Rik
ENSMUSG00000005087	Cd44
ENSMUSG00000026480	Ncf2
ENSMUSG00000042489	Clspn
ENSMUSG00000053040	Aph1c
ENSMUSG00000069910	Spdl1
ENSMUSG00000002769	Gnmt
ENSMUSG00000028581	Laptm5
ENSMUSG00000038304	Cd160
ENSMUSG00000019942	Cdk1
ENSMUSG00000069893	9930111J21Rik1
ENSMUSG00000044313	Mab21l3
ENSMUSG00000040345	Arhgap9
ENSMUSG00000034416	Pkd1l2
ENSMUSG00000004266	Ptpn6
ENSMUSG00000043036	Ccdc63
ENSMUSG00000015340	Cybb
ENSMUSG00000084616	Gm25047
ENSMUSG00000046997	Spsb4
ENSMUSG00000092283	Gm20412
ENSMUSG00000021965	Ska3
ENSMUSG00000044201	Cdc25c
ENSMUSG00000056569	Mpz
ENSMUSG00000084989	E030010N08Rik
ENSMUSG00000027326	Casc5
ENSMUSG00000042607	Asb4
ENSMUSG00000043811	Rtn4r
ENSMUSG00000027469	Tpx2
ENSMUSG00000034738	Nostrin
ENSMUSG00000001750	Tcirg1
ENSMUSG00000004267	Eno2
ENSMUSG00000059493	Nhs
ENSMUSG00000066975	Cryba4
ENSMUSG00000026177	Slc11a1
ENSMUSG00000050010	Shisa3
ENSMUSG00000042684	Npl
ENSMUSG00000021457	Syk
ENSMUSG00000037544	Dlgap5
ENSMUSG00000026683	Nuf2
ENSMUSG00000092060	Bend4
ENSMUSG00000058715	Fcer1g
ENSMUSG00000000204	Slfn4
ENSMUSG00000047793	Sned1
ENSMUSG00000020312	Shc2
ENSMUSG00000038843	Gcnt1
ENSMUSG00000026582	Sele
ENSMUSG00000030148	Clec4a2
ENSMUSG00000079419	Ms4a6c
ENSMUSG00000051498	Tlr6
ENSMUSG00000042724	Map3k9
ENSMUSG00000028716	Pdzk1ip1
ENSMUSG00000027506	Tpd52
ENSMUSG00000052776	Oas1a
ENSMUSG00000031264	Btk
ENSMUSG00000006731	B4galnt1
ENSMUSG00000085316	D330050G23Rik
ENSMUSG00000021423	Ly86
ENSMUSG00000046179	E2f8
ENSMUSG00000074785	Plxnc1
ENSMUSG00000073490	AI607873
ENSMUSG00000031387	Renbp
ENSMUSG00000032532	Cck
ENSMUSG00000072620	Slfn2
ENSMUSG00000096976	Gm26882
ENSMUSG00000048865	Arhgap30
ENSMUSG00000032218	Ccnb2
ENSMUSG00000060044	Tmem26
ENSMUSG00000011171	Vipr2
ENSMUSG00000060029	4930473A02Rik
ENSMUSG00000039193	Nlrc4
ENSMUSG00000039187	Fanci
ENSMUSG00000020914	Top2a
ENSMUSG00000048612	Myof
ENSMUSG00000040276	Pacsin1
ENSMUSG00000091345	Col6a5
ENSMUSG00000019122	Ccl9
ENSMUSG00000031506	Ptpn7
ENSMUSG00000071715	Ncf4
ENSMUSG00000078945	Naip2
ENSMUSG00000022237	Ankrd33b
ENSMUSG00000028927	Padi2
ENSMUSG00000043895	S1pr2
ENSMUSG00000015829	Tnr
ENSMUSG00000036172	Cd200r3
ENSMUSG00000047798	Cd300lf
ENSMUSG00000039208	Metrnl
ENSMUSG00000026395	Ptprc
ENSMUSG00000078452	Raet1d
ENSMUSG00000048677	Tpcn2
ENSMUSG00000097715	Gpr137b-ps
ENSMUSG00000022788	Fgd4
ENSMUSG00000030218	Mgp
ENSMUSG00000037370	Enpp1
ENSMUSG00000028068	Iqgap3
ENSMUSG00000074206	Adh6b
ENSMUSG00000028832	Stmn1
ENSMUSG00000046295	Ankle1
ENSMUSG00000027323	Rad51
ENSMUSG00000086813	Gm13657
ENSMUSG00000031004	Mki67
ENSMUSG00000052889	Prkcb
ENSMUSG00000033453	Adamts15
ENSMUSG00000098112	Bin2
ENSMUSG00000024084	Qpct
ENSMUSG00000003812	Dnase2a
ENSMUSG00000024617	Camk2a
ENSMUSG00000090564	A430057M04Rik
ENSMUSG00000006585	Cdt1
ENSMUSG00000027331	Knstrn
ENSMUSG00000041498	Kif14
ENSMUSG00000022871	Fetub
ENSMUSG00000029414	Kntc1
ENSMUSG00000036446	Lum
ENSMUSG00000030223	Ptpro
ENSMUSG00000032589	Bsn
ENSMUSG00000008496	Pou2f2
ENSMUSG00000021306	Gpr137b
ENSMUSG00000068697	Myoz1
ENSMUSG00000027715	Ccna2
ENSMUSG00000023982	Guca1a
ENSMUSG00000027004	Frzb
ENSMUSG00000067714	Lpar5
ENSMUSG00000023169	Slc38a1
ENSMUSG00000004347	Pde1c
ENSMUSG00000031444	F10
ENSMUSG00000028587	Orc1
ENSMUSG00000026259	Ngef
ENSMUSG00000019874	Fabp7
ENSMUSG00000036896	C1qc
ENSMUSG00000092550	Gm20496
ENSMUSG00000044788	Fads6
ENSMUSG00000027199	Gatm
ENSMUSG00000021697	Depdc1b
ENSMUSG00000026956	Uap1l1
ENSMUSG00000086330	1700007J10Rik
ENSMUSG00000026627	Tmem206
ENSMUSG00000016498	Pdcd1lg2
ENSMUSG00000035683	Melk
ENSMUSG00000022021	Diap3
ENSMUSG00000033031	C330027C09Rik
ENSMUSG00000047534	Mis18bp1
ENSMUSG00000032020	Ubash3b
ENSMUSG00000030342	Cd9
ENSMUSG00000026564	Dusp27
ENSMUSG00000033581	Igf2bp2
ENSMUSG00000035891	Cerk
ENSMUSG00000005470	Asf1b
ENSMUSG00000070323	Mmp27
ENSMUSG00000024680	Ms4a2
ENSMUSG00000083307	AA414768
ENSMUSG00000031608	Galnt7
ENSMUSG00000042759	Apobr
ENSMUSG00000048922	Cdca2
ENSMUSG00000067889	Sptbn2
ENSMUSG00000040659	Efhd2
ENSMUSG00000002055	Spag5
ENSMUSG00000028702	Rad54l
ENSMUSG00000024768	Lipf
ENSMUSG00000023045	Soat2
ENSMUSG00000085425	Gm15648
ENSMUSG00000038276	Asic3
ENSMUSG00000038390	Gpr162
ENSMUSG00000030798	Cd37
ENSMUSG00000058248	Kcnh1
ENSMUSG00000020340	Cyfip2
ENSMUSG00000017754	Pltp
ENSMUSG00000030867	Plk1
ENSMUSG00000036768	Kif15
ENSMUSG00000021508	Cxcl14
ENSMUSG00000065422	Mir221
ENSMUSG00000039474	Wfs1
ENSMUSG00000048327	Ckap2l
ENSMUSG00000039055	Eme1
ENSMUSG00000050751	Pgbd5
ENSMUSG00000030096	Slc6a6
ENSMUSG00000022372	Sla
ENSMUSG00000026073	Il1r2
ENSMUSG00000027208	Fgf7
ENSMUSG00000024056	Ndc80
ENSMUSG00000000562	Adora3
ENSMUSG00000054640	Slc8a1
ENSMUSG00000041362	4930506M07Rik
ENSMUSG00000039981	Zc3h12d
ENSMUSG00000070390	Nlrp1b
ENSMUSG00000039809	Gabbr2
ENSMUSG00000086564	Cd101
ENSMUSG00000006411	Pvrl4
ENSMUSG00000058099	Nfam1
ENSMUSG00000050721	Plekho2
ENSMUSG00000015222	Map2
ENSMUSG00000038943	Prc1
ENSMUSG00000020234	4930404N11Rik
ENSMUSG00000033952	Aspm
ENSMUSG00000003282	Plag1
ENSMUSG00000028859	Csf3r
ENSMUSG00000022945	Chaf1b
ENSMUSG00000042385	Gzmk
ENSMUSG00000022422	Dscc1
ENSMUSG00000027220	Syt13
ENSMUSG00000006219	Fblim1
ENSMUSG00000061175	Fnip2
ENSMUSG00000078773	Rad54b
ENSMUSG00000078521	Aunip
ENSMUSG00000022831	Hcls1
ENSMUSG00000030134	Rasgef1a
ENSMUSG00000036931	Nfkbid
ENSMUSG00000024401	Tnf
ENSMUSG00000031165	Was
ENSMUSG00000036943	Rab8b
ENSMUSG00000017929	B4galt5
ENSMUSG00000072082	Ccnf
ENSMUSG00000015950	Ncf1
ENSMUSG00000033685	Ucp2
ENSMUSG00000032322	Pstpip1
ENSMUSG00000030793	Pycard
ENSMUSG00000036109	Mbnl3
ENSMUSG00000036381	P2ry14
ENSMUSG00000040204	2810417H13Rik
ENSMUSG00000020808	Fam64a
ENSMUSG00000021720	Rnf180
ENSMUSG00000000682	Cd52
ENSMUSG00000029822	Osbpl3
ENSMUSG00000043091	Tuba1c
ENSMUSG00000090458	Gm17122
ENSMUSG00000053706	B430305J03Rik
ENSMUSG00000031558	Slit2
ENSMUSG00000026809	1700026L06Rik
ENSMUSG00000085894	Gm15832
ENSMUSG00000097471	5830432E09Rik
ENSMUSG00000052180	Serpinb6c
ENSMUSG00000025194	Abcc2
ENSMUSG00000039519	Cyp7b1
ENSMUSG00000030351	Tspan11
ENSMUSG00000031662	Snx20
ENSMUSG00000049134	Nrap
ENSMUSG00000030263	Lrmp
ENSMUSG00000029923	Rab19
ENSMUSG00000005413	Hmox1
ENSMUSG00000041695	Kcnj2
ENSMUSG00000021384	Susd3
ENSMUSG00000031101	Sash3
ENSMUSG00000044583	Tlr7
ENSMUSG00000029771	Irf5
ENSMUSG00000026288	Inpp5d
ENSMUSG00000028718	Stil
ENSMUSG00000034311	Kif4
ENSMUSG00000029204	Rhoh
ENSMUSG00000095385	D630033O11Rik
ENSMUSG00000015355	Cd48
ENSMUSG00000051235	Gen1
ENSMUSG00000028362	Tnfsf8
ENSMUSG00000082676	Gm11843
ENSMUSG00000036606	Plxnb2
ENSMUSG00000060572	Mfap2
ENSMUSG00000086712	AI427809
ENSMUSG00000024087	Cyp1b1
ENSMUSG00000036887	C1qa
ENSMUSG00000020848	Doc2b
ENSMUSG00000049709	Nlrp10
ENSMUSG00000030786	Itgam
ENSMUSG00000041064	Pif1
ENSMUSG00000040907	Atp1a3
ENSMUSG00000040855	Reps2
ENSMUSG00000076940	Iglv2
ENSMUSG00000026796	Fam129b
ENSMUSG00000022357	Klhl38
ENSMUSG00000027832	Ptx3
ENSMUSG00000086763	B230378P21Rik
ENSMUSG00000027843	Ptpn22
ENSMUSG00000085030	2810455O05Rik
ENSMUSG00000074336	Apoc4
ENSMUSG00000045273	Cenph
ENSMUSG00000043085	Tmem82
ENSMUSG00000034773	BC030867
ENSMUSG00000031289	Il13ra2
ENSMUSG00000034853	Acot11
ENSMUSG00000026429	Ube2t
ENSMUSG00000018927	Ccl6
ENSMUSG00000083161	Gm11427
ENSMUSG00000051517	Arhgef39
ENSMUSG00000030147	Clec4b1
ENSMUSG00000086291	Gm15513
ENSMUSG00000072437	Nanos1
ENSMUSG00000048163	Selplg
ENSMUSG00000032691	Nlrp3
ENSMUSG00000066366	Serpina1a
ENSMUSG00000000957	Mmp14
ENSMUSG00000028773	Fabp3
ENSMUSG00000025020	Slit1
ENSMUSG00000030674	Qprt
ENSMUSG00000037568	Vash2
ENSMUSG00000041449	Serpina3h
ENSMUSG00000039621	Prex1
ENSMUSG00000085048	Gm15537
ENSMUSG00000033066	Gas7
ENSMUSG00000012443	Kif11
ENSMUSG00000035561	Aldh1b1
ENSMUSG00000035020	Epgn
ENSMUSG00000073412	Lst1
ENSMUSG00000034764	1700006J14Rik
ENSMUSG00000032890	Rims3
ENSMUSG00000020218	Wif1
ENSMUSG00000040229	Gpr34
ENSMUSG00000069516	Lyz2
ENSMUSG00000023349	Clec4n
ENSMUSG00000026928	Card9
ENSMUSG00000050022	Amz1
ENSMUSG00000039206	Daglb
ENSMUSG00000042331	Specc1
ENSMUSG00000030760	Acer3
ENSMUSG00000037217	Syn1
ENSMUSG00000032089	Il10ra
ENSMUSG00000052142	Rasal3
ENSMUSG00000097840	Gm26756
ENSMUSG00000028873	Cdca8
ENSMUSG00000031609	Sap30
ENSMUSG00000057132	Rpgrip1
ENSMUSG00000074220	Zfp382
ENSMUSG00000020635	Fkbp1b
ENSMUSG00000026548	Slamf9
ENSMUSG00000026605	Cenpf
ENSMUSG00000071714	Csf2rb2
ENSMUSG00000061666	Gdpd1
ENSMUSG00000026669	Mcm10
ENSMUSG00000028843	Sh3bgrl3
ENSMUSG00000022270	Fam134b
ENSMUSG00000030745	Il21r
ENSMUSG00000052760	A630001G21Rik
ENSMUSG00000020649	Rrm2
ENSMUSG00000015745	Plekho1
ENSMUSG00000028931	Kcnab2
ENSMUSG00000030200	Bcl2l14
ENSMUSG00000033220	Rac2
ENSMUSG00000045328	Cenpe
ENSMUSG00000097680	Gm26642
ENSMUSG00000074570	Cass4
ENSMUSG00000085126	Gm12589
ENSMUSG00000051506	Wdfy4
ENSMUSG00000028591	Pramef12
ENSMUSG00000006398	Cdc20
ENSMUSG00000023913	Pla2g7
ENSMUSG00000024397	Aif1
ENSMUSG00000091119	Ccdc152
ENSMUSG00000057191	AB124611
ENSMUSG00000076612	Ighg2c
ENSMUSG00000040212	Emp3
ENSMUSG00000031933	Folr4
ENSMUSG00000025161	Slc16a3
ENSMUSG00000057337	Chst3
ENSMUSG00000005233	Spc25
ENSMUSG00000059326	Csf2ra
ENSMUSG00000022659	Gcsam
ENSMUSG00000087060	2810442I21Rik
ENSMUSG00000041515	Irf8
ENSMUSG00000024989	Cep55
ENSMUSG00000048988	Elfn1
ENSMUSG00000034206	Polq
ENSMUSG00000030844	Rgs10
ENSMUSG00000039252	Lgi2
ENSMUSG00000019845	Tube1
ENSMUSG00000006589	Aprt
ENSMUSG00000039396	Neil3
ENSMUSG00000068744	Psrc1
ENSMUSG00000079685	Ulbp1
ENSMUSG00000084796	A430104N18Rik
ENSMUSG00000078942	Naip6
ENSMUSG00000029082	Bst1
ENSMUSG00000020191	4930415F15Rik
ENSMUSG00000050107	Gsg2
ENSMUSG00000056529	Ptafr
ENSMUSG00000034023	Fancd2
ENSMUSG00000007041	Clic1
ENSMUSG00000030677	Kif22
ENSMUSG00000079553	Kifc1
ENSMUSG00000087107	AI662270
ENSMUSG00000036469	March1
ENSMUSG00000064330	Pde6h
ENSMUSG00000074577	Fam65c
ENSMUSG00000027360	Hdc
ENSMUSG00000019558	Slc6a8
ENSMUSG00000020661	Dnmt3a
ENSMUSG00000031099	Smarca1
ENSMUSG00000079845	Xlr4a
ENSMUSG00000027322	Siglec1
ENSMUSG00000030041	M1ap
ENSMUSG00000059994	Fcrl1
ENSMUSG00000064109	Hcst
ENSMUSG00000058163	Gm5431
ENSMUSG00000051439	Cd14
ENSMUSG00000029177	Cenpa
ENSMUSG00000020897	Aurkb
ENSMUSG00000090881	Gm6904
ENSMUSG00000024677	Ms4a6b
ENSMUSG00000055368	Slc6a2
ENSMUSG00000021636	Marveld2
ENSMUSG00000010461	Eya4
ENSMUSG00000001021	S100a3
ENSMUSG00000041431	Ccnb1
ENSMUSG00000024795	Kif20b
ENSMUSG00000087327	Gm15884
ENSMUSG00000067768	Xlr4b
ENSMUSG00000039936	Pik3cd
ENSMUSG00000026126	Ptpn18
ENSMUSG00000021458	2010111I01Rik
ENSMUSG00000066363	Serpina3f
ENSMUSG00000037466	4930427A07Rik
ENSMUSG00000024791	Cdca5
ENSMUSG00000050390	C77080
ENSMUSG00000030707	Coro1a
ENSMUSG00000026779	Mastl
ENSMUSG00000053930	Shisa6
ENSMUSG00000051242	Pcdhb9
ENSMUSG00000028599	Tnfrsf1b
ENSMUSG00000046182	Gsg1l
ENSMUSG00000024030	Abcg1
ENSMUSG00000001270	Ckb
ENSMUSG00000026979	Psd4
ENSMUSG00000027423	Snx5
ENSMUSG00000034917	Tjp3
ENSMUSG00000020437	Myo1g
ENSMUSG00000025888	Casp1
ENSMUSG00000069830	Nlrp1a
ENSMUSG00000018752	BC096441
ENSMUSG00000025534	Gusb
ENSMUSG00000022952	Runx1
ENSMUSG00000039126	Prune2
ENSMUSG00000040809	Chi3l3
ENSMUSG00000079547	H2-DMb1
ENSMUSG00000036046	5031439G07Rik
ENSMUSG00000046591	Ticrr
ENSMUSG00000031504	Rab20
ENSMUSG00000026807	Ak8
ENSMUSG00000051212	Gpr183
ENSMUSG00000029468	P2rx7
ENSMUSG00000074899	Sptbn5
ENSMUSG00000021665	Hexb
ENSMUSG00000041406	BC055324
ENSMUSG00000038540	Tmc3
ENSMUSG00000005124	Wisp1
ENSMUSG00000051378	Kif18b
ENSMUSG00000032261	Sh3bgrl2
ENSMUSG00000086514	Gm11747
ENSMUSG00000025743	Sdc3
ENSMUSG00000021281	Tnfaip2
ENSMUSG00000053113	Socs3
ENSMUSG00000046456	Tmem150b
ENSMUSG00000093622	Gm20703
ENSMUSG00000036246	Gmip
ENSMUSG00000057948	Unc13d
ENSMUSG00000092349	BC033916
ENSMUSG00000022602	Arc
ENSMUSG00000023945	Slc5a7
ENSMUSG00000052384	Nrros
ENSMUSG00000096140	Ankrd66
ENSMUSG00000047180	Neurl3
ENSMUSG00000031543	Ank1
ENSMUSG00000089901	Gm8113
ENSMUSG00000028494	Plin2
ENSMUSG00000071068	Treml2
ENSMUSG00000030577	Cd22
ENSMUSG00000037725	Ckap2
ENSMUSG00000025314	Ptprj
ENSMUSG00000058046	4933430I17Rik
ENSMUSG00000032725	Folr2
ENSMUSG00000024660	Incenp
ENSMUSG00000035914	Cd276
ENSMUSG00000001517	Foxm1
ENSMUSG00000002699	Lcp2
ENSMUSG00000026344	Lypd1
ENSMUSG00000019775	Rgs17
ENSMUSG00000032207	Lipc
ENSMUSG00000026573	Xcl1
ENSMUSG00000030742	Lat
ENSMUSG00000034792	Gna15
ENSMUSG00000058486	Wdr91
ENSMUSG00000026317	Cln8
ENSMUSG00000003779	Kif20a
ENSMUSG00000035279	Ssc5d
ENSMUSG00000078783	Gm9733
ENSMUSG00000030217	Art4
ENSMUSG00000042129	Rassf4
ENSMUSG00000018500	Adora2b
ENSMUSG00000039982	Dtx4
ENSMUSG00000033200	Tpsg1
ENSMUSG00000021728	Emb
ENSMUSG00000061288	Taok3
ENSMUSG00000031355	Arhgap6
ENSMUSG00000039814	Xkr5
ENSMUSG00000026712	Mrc1
ENSMUSG00000054555	Adam12
ENSMUSG00000044966	Fbxo48
ENSMUSG00000035228	Ccdc106
ENSMUSG00000037196	Pacrg
ENSMUSG00000062510	Nsl1
ENSMUSG00000024347	Psd2
ENSMUSG00000035711	Dok3
ENSMUSG00000043832	Clec4a3
ENSMUSG00000055069	Rab39
ENSMUSG00000040964	Arhgef10l
ENSMUSG00000053977	Cd8a
ENSMUSG00000043939	A530064D06Rik
ENSMUSG00000081998	Gm13245
ENSMUSG00000043664	Tmem221
ENSMUSG00000055976	Cldn23
ENSMUSG00000033949	Trim36
ENSMUSG00000067206	Lrrc66
ENSMUSG00000031963	Bmper
ENSMUSG00000026271	Gpr35
ENSMUSG00000052512	Nav2
ENSMUSG00000050370	Ch25h
ENSMUSG00000048497	Mmgt2
ENSMUSG00000047407	Tgif1
ENSMUSG00000027009	Itga4
ENSMUSG00000032344	Mb21d1
ENSMUSG00000021575	Ahrr
ENSMUSG00000096606	Gm4980
ENSMUSG00000087135	Gm16096
ENSMUSG00000044206	Vsig4
ENSMUSG00000048905	4930539E08Rik
ENSMUSG00000032698	Lmo2
ENSMUSG00000069793	Slfn9
ENSMUSG00000034786	Gpsm3
ENSMUSG00000009185	Ccl8
ENSMUSG00000040274	Cdk6
ENSMUSG00000049625	Tifab
ENSMUSG00000001228	Uhrf1
ENSMUSG00000034959	5031414D18Rik
ENSMUSG00000096965	3300005D01Rik
ENSMUSG00000032113	Chek1
ENSMUSG00000038331	Satb2
ENSMUSG00000056130	Ticam2
ENSMUSG00000030346	Rad51ap1
ENSMUSG00000085278	Gm12841
ENSMUSG00000027339	Rassf2
ENSMUSG00000023505	Cdca3
ENSMUSG00000042349	Ikbke
ENSMUSG00000036908	Unc93b1
ENSMUSG00000030154	Klrb1f
ENSMUSG00000029762	Akr1b8
ENSMUSG00000019935	Slc17a8
ENSMUSG00000027293	Ehd4
ENSMUSG00000049109	Themis
ENSMUSG00000009687	Fxyd5
ENSMUSG00000073018	Gm1070
ENSMUSG00000037306	Man1c1
ENSMUSG00000030657	Xylt1
ENSMUSG00000021483	Cdk20
ENSMUSG00000046688	Tifa
ENSMUSG00000029553	Tfec
ENSMUSG00000019464	Ptger1
ENSMUSG00000034330	Plcg2
ENSMUSG00000025938	Slco5a1
ENSMUSG00000046719	Nxph3
ENSMUSG00000033792	Atp7a
ENSMUSG00000026435	Slc45a3
ENSMUSG00000032812	Arap1
ENSMUSG00000042842	Serpinb6b
ENSMUSG00000020493	Prr11
ENSMUSG00000025058	5430427O19Rik
ENSMUSG00000095609	Gm21188
ENSMUSG00000024621	Csf1r
ENSMUSG00000029470	P2rx4
ENSMUSG00000071203	Naip5
ENSMUSG00000018920	Cxcl16
ENSMUSG00000056494	Cngb3
ENSMUSG00000035109	Shc4
ENSMUSG00000005410	Mcm5
ENSMUSG00000021948	Prkcd
ENSMUSG00000067591	Klra3
ENSMUSG00000098090	2700099C18Rik
ENSMUSG00000004473	Clec11a
ENSMUSG00000079671	2610203C22Rik
ENSMUSG00000027699	Ect2
ENSMUSG00000041216	Clvs1
ENSMUSG00000028175	Depdc1a
ENSMUSG00000038932	Tcfl5
ENSMUSG00000005054	Cstb
ENSMUSG00000029560	Snx8
ENSMUSG00000021569	Trip13
ENSMUSG00000026355	Mcm6
ENSMUSG00000026786	Apbb1ip
ENSMUSG00000031554	Adam5
ENSMUSG00000087196	Gm13373
ENSMUSG00000029552	Tes
ENSMUSG00000031595	Pdgfrl
ENSMUSG00000068101	Cenpm
ENSMUSG00000056124	B4galt6
ENSMUSG00000004415	Col26a1
ENSMUSG00000000958	Slc7a7
ENSMUSG00000041757	Plekha6
ENSMUSG00000002100	Mybpc3
ENSMUSG00000046410	Kcnk6
ENSMUSG00000040740	Slc25a34
ENSMUSG00000039873	Neurl2
ENSMUSG00000042451	Mybph
ENSMUSG00000038233	Fam198a
ENSMUSG00000082088	Gm15753
ENSMUSG00000057135	Scimp
ENSMUSG00000060512	0610040J01Rik
ENSMUSG00000021822	Plau
ENSMUSG00000027994	Ccdc109b
ENSMUSG00000044303	Cdkn2a
ENSMUSG00000070802	Pnmal2
ENSMUSG00000026536	Mnda
ENSMUSG00000034317	Trim59
ENSMUSG00000032436	Cmtm7
ENSMUSG00000049643	2310022A10Rik
ENSMUSG00000063594	Gng8
ENSMUSG00000026458	Ppfia4
ENSMUSG00000039145	Camk1d
ENSMUSG00000060459	Kng2
ENSMUSG00000008136	Fhl2
ENSMUSG00000047810	Ccdc88b
ENSMUSG00000064147	Rab44
ENSMUSG00000002076	Hsf2bp
ENSMUSG00000022876	Samsn1
ENSMUSG00000026822	Lcn2
ENSMUSG00000056394	Lig1
ENSMUSG00000044350	Lacc1
ENSMUSG00000068699	Flnc
ENSMUSG00000078502	Gm13212
ENSMUSG00000000881	Dlg3
ENSMUSG00000074476	Spc24
ENSMUSG00000056069	Fam105a
ENSMUSG00000051497	Kcnj16
ENSMUSG00000039153	Runx2
ENSMUSG00000054115	Skp2
ENSMUSG00000037852	Cpe
ENSMUSG00000085584	Rgag1
ENSMUSG00000079105	C7
ENSMUSG00000097993	Ptprv
ENSMUSG00000034310	Tmem132d
ENSMUSG00000032717	Mdfi
ENSMUSG00000037731	Themis2
ENSMUSG00000054400	Cklf
ENSMUSG00000049001	Ndnf
ENSMUSG00000024810	Il33
ENSMUSG00000094845	Tmem95
ENSMUSG00000017861	Mybl2
ENSMUSG00000050914	Ankrd37
ENSMUSG00000040713	Creg1
ENSMUSG00000022504	Ciita
ENSMUSG00000020573	Pik3cg
ENSMUSG00000051220	Ercc6l
ENSMUSG00000024691	Fam111a
ENSMUSG00000044701	Il27
ENSMUSG00000050592	Fam78a
ENSMUSG00000005447	Pafah1b3
ENSMUSG00000049526	Tmem202
ENSMUSG00000073678	Pgap1
ENSMUSG00000045733	Sprn
ENSMUSG00000001763	Tspan33
ENSMUSG00000037628	Cdkn3
ENSMUSG00000024912	Fosl1
ENSMUSG00000025328	Padi3
ENSMUSG00000042404	Dennd4b
ENSMUSG00000032643	Fhl3
ENSMUSG00000024742	Fen1
ENSMUSG00000017760	Ctsa
ENSMUSG00000031971	Ccsap
ENSMUSG00000097245	Gm5421
ENSMUSG00000027496	Aurka
ENSMUSG00000022034	Esco2
ENSMUSG00000004633	Chn2
ENSMUSG00000062380	Tubb3
ENSMUSG00000007646	Rad51c
ENSMUSG00000020778	Ten1
ENSMUSG00000056515	Rab31
ENSMUSG00000027380	Acoxl
ENSMUSG00000071708	Sms
ENSMUSG00000021176	Efcab11
ENSMUSG00000039934	Gsap
ENSMUSG00000026955	Sapcd2
ENSMUSG00000031596	Slc7a2
ENSMUSG00000037995	Igsf9
ENSMUSG00000060063	Alox5ap
ENSMUSG00000097461	Gm26735
ENSMUSG00000036223	Ska1
ENSMUSG00000027995	Tlr2
ENSMUSG00000038623	Tm6sf1
ENSMUSG00000034708	Grn
ENSMUSG00000031389	Arhgap4
ENSMUSG00000041481	Serpina3g
ENSMUSG00000003206	Ebi3
ENSMUSG00000034156	Bzrap1
ENSMUSG00000021549	Rasa1
ENSMUSG00000026039	Sgol2
ENSMUSG00000033721	Vav3
ENSMUSG00000072572	Slc39a2
ENSMUSG00000054247	Gm9939
ENSMUSG00000020723	Cacng4
ENSMUSG00000031756	Cenpn
ENSMUSG00000022014	Epsti1
ENSMUSG00000026012	Cd28
ENSMUSG00000031875	Cmtm3
ENSMUSG00000097328	Tnfsf12
ENSMUSG00000024059	Clip4
ENSMUSG00000004207	Psap
ENSMUSG00000049307	Fut4
ENSMUSG00000034591	Slc41a2
ENSMUSG00000097057	Gm17638
ENSMUSG00000059901	Adamts14
ENSMUSG00000028864	Hgf
ENSMUSG00000024644	Cndp2
ENSMUSG00000020592	Sdc1
ENSMUSG00000029718	Pcolce
ENSMUSG00000002266	Zim1
ENSMUSG00000038059	Smim3
ENSMUSG00000053044	Cd8b1
ENSMUSG00000037860	Aim2
ENSMUSG00000038910	Plcl2
ENSMUSG00000026069	Il1rl1
ENSMUSG00000097467	Gm26737
ENSMUSG00000005824	Tnfsf14
ENSMUSG00000055809	Dnaaf3
ENSMUSG00000022102	Dok2
ENSMUSG00000046432	Ngfrap1
ENSMUSG00000064043	Trerf1
ENSMUSG00000047462	A530099J19Rik
ENSMUSG00000097357	Gm16793
ENSMUSG00000024268	Celf4
ENSMUSG00000000278	Scpep1
ENSMUSG00000026196	Bard1
ENSMUSG00000035439	Haus8
ENSMUSG00000050493	Fam167b
ENSMUSG00000024521	Pmaip1
ENSMUSG00000040441	Slc26a10
ENSMUSG00000024903	Lao1
ENSMUSG00000031722	Hp
ENSMUSG00000029217	Tec
ENSMUSG00000026737	Pip4k2a
ENSMUSG00000025232	Hexa
ENSMUSG00000027381	Bcl2l11
ENSMUSG00000032254	Kif23
ENSMUSG00000038244	Mical2
ENSMUSG00000043557	Mdga1
ENSMUSG00000051682	Treml4
ENSMUSG00000053158	Fes
ENSMUSG00000058290	Espl1
ENSMUSG00000061119	Prcp
ENSMUSG00000030167	Klrc1
ENSMUSG00000041219	Arhgap11a
ENSMUSG00000024675	Ms4a4c
ENSMUSG00000031903	Pla2g15
ENSMUSG00000018654	Ikzf1
ENSMUSG00000027750	Postn
ENSMUSG00000040084	Bub1b
ENSMUSG00000016256	Ctsz
ENSMUSG00000036622	Atp13a2
ENSMUSG00000019982	Myb
ENSMUSG00000063506	Arhgap22
ENSMUSG00000016179	Camk1g
ENSMUSG00000022548	Apod
ENSMUSG00000069609	Gm11710
ENSMUSG00000006715	Gmnn
ENSMUSG00000030536	Iqgap1
ENSMUSG00000026043	Col3a1
ENSMUSG00000041859	Mcm3
ENSMUSG00000021003	Galc
ENSMUSG00000034993	Vat1
ENSMUSG00000079523	Tmsb10
ENSMUSG00000040061	Plcb2
ENSMUSG00000034947	Tmem106a
ENSMUSG00000079173	Zan
ENSMUSG00000035934	Pknox2
ENSMUSG00000032359	Ctsh
ENSMUSG00000060216	Arrb2
ENSMUSG00000031385	Plxnb3
ENSMUSG00000035697	Hmha1
ENSMUSG00000028555	Ttc39a
ENSMUSG00000058571	Gpc6
ENSMUSG00000097705	Gm26740
ENSMUSG00000022657	Cd96
ENSMUSG00000039699	Batf2
ENSMUSG00000027883	Gpsm2
ENSMUSG00000090939	Gm17147
ENSMUSG00000001473	Tubb6
ENSMUSG00000049916	2610318N02Rik
ENSMUSG00000004612	Nkg7
ENSMUSG00000021701	Plk2
ENSMUSG00000075028	Prdm11
ENSMUSG00000024910	Ctsw
ENSMUSG00000042286	Stab1
ENSMUSG00000052087	Rgs14
ENSMUSG00000034265	Zdhhc14
ENSMUSG00000051457	Spn
ENSMUSG00000021939	Ctsb
ENSMUSG00000068758	Il3ra
ENSMUSG00000035208	Slfn8
ENSMUSG00000019992	Mtfr2
ENSMUSG00000098318	RP23-45G16.5
ENSMUSG00000027306	Nusap1
ENSMUSG00000001020	S100a4
ENSMUSG00000073705	Apitd1
ENSMUSG00000037907	Ankrd13b
ENSMUSG00000035158	Mitf
ENSMUSG00000086283	2810433D01Rik
ENSMUSG00000024180	Tmem8
ENSMUSG00000027670	Ocstamp
ENSMUSG00000038352	Arl5c
ENSMUSG00000045322	Tlr9
ENSMUSG00000072949	Acot1
ENSMUSG00000030641	4632434I11Rik
ENSMUSG00000035274	Tpbg
ENSMUSG00000068606	Gm4841
ENSMUSG00000027544	Nfatc2
ENSMUSG00000029910	Mad2l1
ENSMUSG00000063286	Gm8995
ENSMUSG00000050075	Gpr171
ENSMUSG00000052407	Ccdc171
ENSMUSG00000033192	Lpcat2
ENSMUSG00000017943	Gdap1l1
ENSMUSG00000019088	Dnase1l1
ENSMUSG00000029153	Ociad2
ENSMUSG00000031129	Slc9a9
ENSMUSG00000097974	Gm10605
ENSMUSG00000030623	1700019G06Rik
ENSMUSG00000020216	Jsrp1
ENSMUSG00000002668	Dennd1c
ENSMUSG00000070056	Mfhas1
ENSMUSG00000052336	Cx3cr1
ENSMUSG00000021591	Glrx
ENSMUSG00000039116	Gpr126
ENSMUSG00000049866	Arl4c
ENSMUSG00000060594	Layn
ENSMUSG00000028071	Sh2d2a
ENSMUSG00000026586	Prrx1
ENSMUSG00000071669	Snx29
ENSMUSG00000030156	Cd69
ENSMUSG00000085129	5031425F14Rik
ENSMUSG00000030361	Klrb1a
ENSMUSG00000042766	Trim46
ENSMUSG00000005465	Il27ra
ENSMUSG00000074818	Pdzd7
ENSMUSG00000004891	Nes
ENSMUSG00000051735	Rinl
ENSMUSG00000030220	Arhgdib
ENSMUSG00000006403	Adamts4
ENSMUSG00000048234	Rnf149
ENSMUSG00000054196	Cthrc1
ENSMUSG00000097582	Gm26527
ENSMUSG00000007107	Atp1a4
ENSMUSG00000040658	Dnph1
ENSMUSG00000036634	Mag
ENSMUSG00000078439	2210404O07Rik
ENSMUSG00000002870	Mcm2
ENSMUSG00000086552	A730090H04Rik
ENSMUSG00000020695	Mrc2
ENSMUSG00000073405	C920025E04Rik
ENSMUSG00000020644	Id2
ENSMUSG00000030325	Klrb1c
ENSMUSG00000046031	Fam26f
ENSMUSG00000037418	Best1
ENSMUSG00000074342	I830077J02Rik
ENSMUSG00000032094	Cd3d
ENSMUSG00000066595	Mfsd7b
ENSMUSG00000010142	Tnfrsf13b
ENSMUSG00000017631	Abr
ENSMUSG00000034765	Dusp5
ENSMUSG00000029716	Tfr2
ENSMUSG00000067344	Rps25-ps1
ENSMUSG00000021477	Ctsl
ENSMUSG00000075269	Bex6
ENSMUSG00000054203	Ifi205
ENSMUSG00000031375	Bgn
ENSMUSG00000030720	Cln3
ENSMUSG00000045136	Tubb2b
ENSMUSG00000024827	Gldc
ENSMUSG00000034906	Ncaph
ENSMUSG00000006273	Atp6v1b2
ENSMUSG00000028451	1700022I11Rik
ENSMUSG00000023067	Cdkn1a
ENSMUSG00000089961	Gm16567
ENSMUSG00000071552	Tigit
ENSMUSG00000002847	Pla1a
ENSMUSG00000022584	Ly6c2
ENSMUSG00000070891	Gm12689
ENSMUSG00000001506	Col1a1
ENSMUSG00000040490	Lrfn2
ENSMUSG00000027342	Pcna
ENSMUSG00000043051	Disc1
ENSMUSG00000020275	Rel
ENSMUSG00000045672	Col27a1
ENSMUSG00000049687	Fam109b
ENSMUSG00000089942	Pira2
ENSMUSG00000025001	Hells
ENSMUSG00000031877	Ces2g
ENSMUSG00000028312	Smc2
ENSMUSG00000035365	Parpbp
ENSMUSG00000040430	Pitpnc1
ENSMUSG00000024298	Zfp871
ENSMUSG00000025190	Got1
ENSMUSG00000048498	Cd300e
ENSMUSG00000030064	Frmd4b
ENSMUSG00000046841	Ckap4
ENSMUSG00000035042	Ccl5
ENSMUSG00000019779	Frk
ENSMUSG00000052837	Junb
ENSMUSG00000035458	Tnni3
ENSMUSG00000027253	Lrp4
ENSMUSG00000026207	Speg
ENSMUSG00000027514	Zbp1
ENSMUSG00000068335	Dok1
ENSMUSG00000090084	Srpx
ENSMUSG00000022221	Ripk3
ENSMUSG00000071379	Hpcal1
ENSMUSG00000021684	Pde8b
ENSMUSG00000080364	Gm25777
ENSMUSG00000034855	Cxcl10
ENSMUSG00000097649	Gm10561
ENSMUSG00000031548	Sfrp1
ENSMUSG00000032870	Smap2
ENSMUSG00000046223	Plaur
ENSMUSG00000031312	Itgb1bp2
ENSMUSG00000073489	Ifi204
ENSMUSG00000024413	Npc1
ENSMUSG00000038917	3930402G23Rik
ENSMUSG00000033386	Frrs1
ENSMUSG00000021725	Parp8
ENSMUSG00000057219	Armc7
ENSMUSG00000048897	Zfp710
ENSMUSG00000036875	Dna2
ENSMUSG00000043004	Gng2
ENSMUSG00000041654	Slc39a11
ENSMUSG00000078190	Dnm3os
ENSMUSG00000029661	Col1a2
ENSMUSG00000032046	Abhd12
ENSMUSG00000047045	Tmem164
ENSMUSG00000027368	Dusp2
ENSMUSG00000022440	C1qtnf6
ENSMUSG00000043671	Dpy19l3
ENSMUSG00000040711	Sh3pxd2b
ENSMUSG00000050708	Ftl1
ENSMUSG00000028167	Bdh2
ENSMUSG00000086742	Gm16201
ENSMUSG00000090399	Nav1
ENSMUSG00000034006	Pqlc1
ENSMUSG00000093445	Lrch4
ENSMUSG00000029275	Gfi1
ENSMUSG00000028917	Plekhm2
ENSMUSG00000049119	Fam110b
ENSMUSG00000034266	Batf
ENSMUSG00000043850	Clrn1
ENSMUSG00000002297	Dbf4
ENSMUSG00000038543	BC028528
ENSMUSG00000003824	Syce2
ENSMUSG00000026547	Tagln2
ENSMUSG00000022305	Lrp12
ENSMUSG00000021536	Adcy2
ENSMUSG00000023015	Racgap1
ENSMUSG00000026475	Rgs16
ENSMUSG00000075122	Cd80
ENSMUSG00000028328	Tmod1
ENSMUSG00000034059	Ypel4
ENSMUSG00000047511	Olfr1396
ENSMUSG00000078763	Slfn1
ENSMUSG00000034656	Cacna1a
ENSMUSG00000007891	Ctsd
ENSMUSG00000087362	Gm13710
ENSMUSG00000024548	Setbp1
ENSMUSG00000036743	Psma8
ENSMUSG00000027978	Prss12
ENSMUSG00000079563	Pglyrp2
ENSMUSG00000037313	Tacc3
ENSMUSG00000019853	Hebp2
ENSMUSG00000039316	Rftn1
ENSMUSG00000036594	H2-Aa
ENSMUSG00000017652	Cd40
ENSMUSG00000056290	Ms4a4b
ENSMUSG00000004099	Dnmt1
ENSMUSG00000000409	Lck
ENSMUSG00000004952	Rasa4
ENSMUSG00000044703	Phf11a
ENSMUSG00000042425	Frmpd3
ENSMUSG00000050157	Gm867
ENSMUSG00000032816	Igdcc4
ENSMUSG00000059674	Cdh24
ENSMUSG00000031362	Xlr4c
ENSMUSG00000024663	Rab3il1
ENSMUSG00000085327	Gm16104
ENSMUSG00000028613	Lrp8
ENSMUSG00000028246	Faxc
ENSMUSG00000004709	Cd244
ENSMUSG00000033730	Egr3
ENSMUSG00000036587	Fut7
ENSMUSG00000037337	Map4k1
ENSMUSG00000076433	BC100451
ENSMUSG00000015437	Gzmb
ENSMUSG00000082286	Pisd-ps1
ENSMUSG00000076928	Trac
ENSMUSG00000028031	Dkk2
ENSMUSG00000049097	Ankrd34a
ENSMUSG00000049775	Tmsb4x
ENSMUSG00000060586	H2-Eb1
ENSMUSG00000025932	Eya1
ENSMUSG00000057058	Skap1
ENSMUSG00000081603	Gm14681
ENSMUSG00000062939	Stat4
ENSMUSG00000074480	Mex3a
ENSMUSG00000031934	Panx1
ENSMUSG00000026068	Il18rap
ENSMUSG00000026648	Dclre1c
ENSMUSG00000031907	Zfp90
ENSMUSG00000022769	Sdf2l1
ENSMUSG00000020654	Adcy3
ENSMUSG00000068129	Cst7
ENSMUSG00000001095	Slc13a2
ENSMUSG00000029175	Slc35f6
ENSMUSG00000021596	Mctp1
ENSMUSG00000032446	Eomes
ENSMUSG00000025969	Nrp2
ENSMUSG00000049037	Clec4a1
ENSMUSG00000026832	Cytip
ENSMUSG00000041731	Pgm5
ENSMUSG00000033467	Crlf2
ENSMUSG00000000318	Clec10a
ENSMUSG00000032221	Mns1
ENSMUSG00000028249	Sdcbp
ENSMUSG00000021485	Mxd3
ENSMUSG00000037572	Wdhd1
ENSMUSG00000079442	St6galnac4
ENSMUSG00000021322	Aoah
ENSMUSG00000045349	Sh2d5
ENSMUSG00000023994	Nfya
ENSMUSG00000056145	AI504432
ENSMUSG00000024610	Cd74
ENSMUSG00000096351	Samd11
ENSMUSG00000047654	Tssk6
ENSMUSG00000027962	Vcam1
ENSMUSG00000011256	Adam19
ENSMUSG00000033161	Atp1a1
ENSMUSG00000047415	Gpr68
ENSMUSG00000042029	Ncapg2
ENSMUSG00000051343	Rab11fip5
ENSMUSG00000035181	Heatr5a
ENSMUSG00000089988	Gm16238
ENSMUSG00000027351	Spred1
ENSMUSG00000097249	Gm26889
ENSMUSG00000071547	Nt5dc2
ENSMUSG00000000386	Mx1
ENSMUSG00000023830	Igf2r
ENSMUSG00000055612	Cdca7
ENSMUSG00000031367	Ap1s2
ENSMUSG00000028457	Atp8b5
ENSMUSG00000043421	Hilpda
ENSMUSG00000047696	Ccdc144b
ENSMUSG00000022385	Gtse1
ENSMUSG00000029231	Pdgfra
ENSMUSG00000037849	Gm4955
ENSMUSG00000073421	H2-Ab1
ENSMUSG00000085604	Gm11547
ENSMUSG00000003644	Rps6ka1
ENSMUSG00000022360	Atad2
ENSMUSG00000032815	Fanca
ENSMUSG00000028337	Coro2a
ENSMUSG00000002341	Ncan
ENSMUSG00000052459	Atp6v1a
ENSMUSG00000049112	Oxtr
ENSMUSG00000043419	A030009H04Rik
ENSMUSG00000006435	Neurl1a
ENSMUSG00000024590	Lmnb1
ENSMUSG00000031342	Gpm6b
ENSMUSG00000026708	Cenpl
ENSMUSG00000073491	Pydc4
ENSMUSG00000061414	Efcab4b
ENSMUSG00000070605	Gm13251
ENSMUSG00000017697	Ada
ENSMUSG00000068196	Col8a1
ENSMUSG00000036894	Rap2b
ENSMUSG00000028369	Svep1
ENSMUSG00000042097	Zfp239
ENSMUSG00000032374	Plod2
ENSMUSG00000086606	Gm13205
ENSMUSG00000004677	Myo9b
ENSMUSG00000053175	Bcl3
ENSMUSG00000063535	Zfp773
ENSMUSG00000079445	B3gnt7
ENSMUSG00000035273	Hpse
ENSMUSG00000078485	Plekhn1
ENSMUSG00000063388	BC023105
ENSMUSG00000040972	Igsf21
ENSMUSG00000018167	Stard3
ENSMUSG00000038151	Prdm1
ENSMUSG00000003665	Has1
ENSMUSG00000044309	Apol7c
ENSMUSG00000075502	Zbtbd6
ENSMUSG00000020422	Tns3
ENSMUSG00000040829	Zmynd15
ENSMUSG00000074607	Tox2
ENSMUSG00000039899	Fgl2
ENSMUSG00000020818	Mfsd11
ENSMUSG00000075284	Wipf1
ENSMUSG00000036022	Fam122b
ENSMUSG00000030761	Myo7a
ENSMUSG00000007888	Crlf1
ENSMUSG00000074277	Phldb3
ENSMUSG00000026341	Actr3
ENSMUSG00000035385	Ccl2
ENSMUSG00000030562	Nox4
ENSMUSG00000019132	BC005537
ENSMUSG00000028838	Extl1
ENSMUSG00000040675	Mthfd1l
ENSMUSG00000022150	Dab2
ENSMUSG00000040710	St8sia4
ENSMUSG00000020871	Dlx4
ENSMUSG00000037944	Ccr7
ENSMUSG00000037846	Rtkn2
ENSMUSG00000031709	Tbc1d9
ENSMUSG00000073016	Uprt
ENSMUSG00000049422	Chchd10
ENSMUSG00000087249	Gm16062
ENSMUSG00000091421	Gm4202
ENSMUSG00000026873	Phf19
ENSMUSG00000019214	Chtf18
ENSMUSG00000026285	Pdcd1
ENSMUSG00000029561	Oasl2
ENSMUSG00000045216	Hs6st1
ENSMUSG00000080374	Gm22953
ENSMUSG00000017718	Afmid
ENSMUSG00000050394	Armcx6
ENSMUSG00000029516	Cit
ENSMUSG00000031097	Tnni2
ENSMUSG00000020395	Itk
ENSMUSG00000059401	Mamld1
ENSMUSG00000043903	Gm22
ENSMUSG00000020974	Pole2
ENSMUSG00000024011	Pi16
ENSMUSG00000084783	Gm15419
ENSMUSG00000053749	Gm9920
ENSMUSG00000087213	2810408I11Rik
ENSMUSG00000056481	Cd248
ENSMUSG00000036718	Micall2
ENSMUSG00000031142	Cacna1f
ENSMUSG00000025351	Cd63
ENSMUSG00000036067	Slc2a6
ENSMUSG00000051354	Samd3
ENSMUSG00000034780	B3galt1
ENSMUSG00000052160	Pld4
ENSMUSG00000040687	Madd
ENSMUSG00000059555	Tor4a
ENSMUSG00000031629	Mlf1ip
ENSMUSG00000018168	Ikzf3
ENSMUSG00000069892	9930111J21Rik2
ENSMUSG00000053038	Gm6180
ENSMUSG00000020773	Trim47
ENSMUSG00000021038	Vipas39
ENSMUSG00000054428	Atpif1
ENSMUSG00000019823	Mical1
ENSMUSG00000036565	Ttyh3
ENSMUSG00000030978	Rrm1
ENSMUSG00000073982	Rhog
ENSMUSG00000040479	Dgkz
ENSMUSG00000009772	Nuak2
ENSMUSG00000026806	Ddx31
ENSMUSG00000042804	Gpr153
ENSMUSG00000025789	St8sia2
ENSMUSG00000044770	Scml4
ENSMUSG00000045625	Pigz
ENSMUSG00000097101	1810034E14Rik
ENSMUSG00000010021	Kif19a
ENSMUSG00000050232	Cxcr3
ENSMUSG00000001525	Tubb5
ENSMUSG00000035299	Mid1
ENSMUSG00000061878	Sphk1
ENSMUSG00000072109	A530040E14Rik
ENSMUSG00000023919	Cenpq
ENSMUSG00000038178	Slc43a2
ENSMUSG00000000901	Mmp11
ENSMUSG00000027087	Itgav
ENSMUSG00000018474	Chd3
ENSMUSG00000049891	Gm7984
ENSMUSG00000071855	Ccdc112
ENSMUSG00000028072	Ntrk1
ENSMUSG00000024669	Cd5
ENSMUSG00000023367	Tmem176a
ENSMUSG00000019979	Apaf1
ENSMUSG00000005142	Man2b1
ENSMUSG00000020021	Fgd6
ENSMUSG00000028528	Dnajc6
ENSMUSG00000009292	Trpm2
ENSMUSG00000041836	Ptpre
ENSMUSG00000000693	Loxl3
ENSMUSG00000052102	Gnpda1
ENSMUSG00000026657	Frmd4a
ENSMUSG00000030592	Ryr1
ENSMUSG00000024909	Efemp2
ENSMUSG00000002602	Axl
ENSMUSG00000030055	Rab43
ENSMUSG00000046402	Rbp1
ENSMUSG00000089542	Gm25835
ENSMUSG00000098557	KCTD12
ENSMUSG00000026365	Cfh
ENSMUSG00000024270	Slc39a6
ENSMUSG00000021260	Hhipl1
ENSMUSG00000036832	Lpar3
ENSMUSG00000044702	Palb2
ENSMUSG00000025163	Cd7
ENSMUSG00000032915	Emr4
ENSMUSG00000093514	Gm9320
ENSMUSG00000037148	Arhgap10
ENSMUSG00000034353	Ramp1
ENSMUSG00000052105	Soga2
ENSMUSG00000091649	Phf11b
ENSMUSG00000043931	Gimap7
ENSMUSG00000021768	Dusp13
ENSMUSG00000052821	Cysltr1
ENSMUSG00000033826	Dnah8
ENSMUSG00000052593	Adam17
ENSMUSG00000027505	Fam209
ENSMUSG00000062661	Ncs1
ENSMUSG00000029163	Emilin1
ENSMUSG00000089762	Ier5l
ENSMUSG00000022885	St6gal1
ENSMUSG00000004530	Coro1c
ENSMUSG00000034902	Pip5k1c
ENSMUSG00000030257	Srgap3
ENSMUSG00000026211	Obsl1
ENSMUSG00000045799	Gm9800
ENSMUSG00000015133	Lrrk1
ENSMUSG00000037405	Icam1
ENSMUSG00000068587	Mgam
ENSMUSG00000056708	Ier5
ENSMUSG00000037686	Aspg
ENSMUSG00000026389	Steap3
ENSMUSG00000037894	H2afz
ENSMUSG00000020810	Cygb
ENSMUSG00000025395	Prim1
ENSMUSG00000074782	4833422C13Rik
ENSMUSG00000042225	Ammecr1
ENSMUSG00000036995	Asap3
ENSMUSG00000037474	Dtl
ENSMUSG00000054051	Ercc6
ENSMUSG00000021175	Cdca7l
ENSMUSG00000035246	Pcyt1b
ENSMUSG00000052566	Hook2
ENSMUSG00000023191	Leprel2
ENSMUSG00000026656	Fcgr2b
ENSMUSG00000039883	Lrrc17
ENSMUSG00000039747	Orai2
ENSMUSG00000024516	Sec11c
ENSMUSG00000029373	Pf4
ENSMUSG00000003134	Tbc1d8
ENSMUSG00000055116	Arntl
ENSMUSG00000044595	Dnd1
ENSMUSG00000020152	Actr2
ENSMUSG00000024334	H2-Oa
ENSMUSG00000003355	Fkbp11
ENSMUSG00000024905	Mtl5
ENSMUSG00000007613	Tgfbr1
ENSMUSG00000025986	Slc39a10
ENSMUSG00000074141	Il4i1
ENSMUSG00000030091	Nup210
ENSMUSG00000029622	Arpc1b
ENSMUSG00000024014	Pim1
ENSMUSG00000019970	Sgk1
ENSMUSG00000046080	Clec9a
ENSMUSG00000030178	Klra13-ps
ENSMUSG00000021062	Rab15
ENSMUSG00000006360	Crip1
ENSMUSG00000028159	Dapp1
ENSMUSG00000091534	Gm17195
ENSMUSG00000033697	Arhgap39
ENSMUSG00000017390	Aldoc
ENSMUSG00000097391	Mirg
ENSMUSG00000056749	Nfil3
ENSMUSG00000072972	Adam4
ENSMUSG00000023087	Ccrn4l
ENSMUSG00000045382	Cxcr4
ENSMUSG00000036334	Igsf10
ENSMUSG00000096768	Erdr1
ENSMUSG00000097004	4731419I09Rik
ENSMUSG00000039115	Itga9
ENSMUSG00000064179	Tnnt1
ENSMUSG00000031833	Mast3
ENSMUSG00000058672	Tubb2a
ENSMUSG00000019564	Arid3a
ENSMUSG00000031779	Ccl22
ENSMUSG00000026546	Ccdc19
ENSMUSG00000052949	Rnf157
ENSMUSG00000041075	Fzd7
ENSMUSG00000020059	Sycp3
ENSMUSG00000021932	Rnaseh2b
ENSMUSG00000030748	Il4ra
ENSMUSG00000058470	Gm8369
ENSMUSG00000046463	5930403N24Rik
ENSMUSG00000027955	Fam198b
ENSMUSG00000004317	Clcn5
ENSMUSG00000040249	Lrp1
ENSMUSG00000028028	Alpk1
ENSMUSG00000078122	F630028O10Rik
ENSMUSG00000021108	Prkch
ENSMUSG00000022436	Sh3bp1
ENSMUSG00000025192	Entpd7
ENSMUSG00000028497	Ptplad2
ENSMUSG00000010830	Kdelr3
ENSMUSG00000041112	Elmo1
ENSMUSG00000020733	Slc9a3r1
ENSMUSG00000039977	Ccdc67
ENSMUSG00000076498	Trbc2
ENSMUSG00000032788	Pdxk
ENSMUSG00000024349	Tmem173
ENSMUSG00000041180	Hectd2
ENSMUSG00000055805	Fmnl1
ENSMUSG00000022439	Parvg
ENSMUSG00000000555	Itga5
ENSMUSG00000002603	Tgfb1
ENSMUSG00000097417	Gm26669
ENSMUSG00000085939	Cd63-ps
ENSMUSG00000075555	Gm10863
ENSMUSG00000046157	Tmem229b
ENSMUSG00000024210	Ip6k3
ENSMUSG00000019027	Dnah1
ENSMUSG00000031885	Cbfb
ENSMUSG00000002835	Chaf1a
ENSMUSG00000076431	Sox4
ENSMUSG00000058454	Dhcr7
ENSMUSG00000015766	Eps8
ENSMUSG00000017057	Il13ra1
ENSMUSG00000042345	Ubash3a
ENSMUSG00000019539	Rcn3
ENSMUSG00000024164	C3
ENSMUSG00000022816	Fstl1
ENSMUSG00000024121	Atp6v0c
ENSMUSG00000038204	Asb10
ENSMUSG00000032750	Gab3
ENSMUSG00000002033	Cd3g
ENSMUSG00000021280	Exoc3l4
ENSMUSG00000027797	Dclk1
ENSMUSG00000030605	Mfge8
ENSMUSG00000093327	Mir5107
ENSMUSG00000024013	Fgd2
ENSMUSG00000049744	Arhgap15
ENSMUSG00000041642	Kif21b
ENSMUSG00000027639	Samhd1
ENSMUSG00000059182	Skap2
ENSMUSG00000020668	Kif3c
ENSMUSG00000074671	Tspyl3
ENSMUSG00000022656	Pvrl3
ENSMUSG00000031343	Gabra3
ENSMUSG00000029994	Anxa4
ENSMUSG00000026193	Fn1
ENSMUSG00000043008	Klhl6
ENSMUSG00000020097	Sgpl1
ENSMUSG00000064373	Sepp1
ENSMUSG00000029366	Dck
ENSMUSG00000038650	Rnh1
ENSMUSG00000087142	Gm12454
ENSMUSG00000017466	Timp2
ENSMUSG00000025747	Tyms
ENSMUSG00000039232	Stx11
ENSMUSG00000096950	Gm9530
ENSMUSG00000041774	Ydjc
ENSMUSG00000038173	Enpp6
ENSMUSG00000046245	Pilra
ENSMUSG00000021268	Meg3
ENSMUSG00000028214	Gem
ENSMUSG00000001555	Fkbp10
ENSMUSG00000028434	Epb4.1l4b
ENSMUSG00000062524	Ncr1
ENSMUSG00000021983	Atp8a2
ENSMUSG00000027654	Fam83d
ENSMUSG00000015312	Gadd45b
ENSMUSG00000024174	Pot1b
ENSMUSG00000075702	Selm
ENSMUSG00000039942	Ptger4
ENSMUSG00000070034	Sp110
ENSMUSG00000024871	Doc2g
ENSMUSG00000048120	Entpd1
ENSMUSG00000036560	Lgi4
ENSMUSG00000008475	Arpc5
ENSMUSG00000045980	Tmem104
ENSMUSG00000028385	Snx30
ENSMUSG00000048388	Fam171b
ENSMUSG00000029291	Rufy3
ENSMUSG00000040722	Scamp5
ENSMUSG00000023990	Tfeb
ENSMUSG00000082044	Gm14284
ENSMUSG00000035493	Tgfbi
ENSMUSG00000048852	Gm12185
ENSMUSG00000017830	Dhx58
ENSMUSG00000085761	4930455G09Rik
ENSMUSG00000015027	Galns
ENSMUSG00000031216	Stard8
ENSMUSG00000027340	Slc23a2
ENSMUSG00000037990	Sh3rf3
ENSMUSG00000041831	Sytl3
ENSMUSG00000037295	Ldlrap1
ENSMUSG00000027533	Fabp5
ENSMUSG00000004626	Stxbp2
ENSMUSG00000048285	Frmd6
ENSMUSG00000029299	Abcg3
ENSMUSG00000032400	Zwilch
ENSMUSG00000057069	Ero1lb
ENSMUSG00000030737	Slco2b1
ENSMUSG00000037593	BC030499
ENSMUSG00000078956	Gm14221
ENSMUSG00000028689	Ccdc163
ENSMUSG00000023274	Cd4
ENSMUSG00000003873	Bax
ENSMUSG00000000791	Il12rb1
ENSMUSG00000022094	Slc39a14
ENSMUSG00000022335	Zfat
ENSMUSG00000078794	Dact3
ENSMUSG00000023143	Nagpa
ENSMUSG00000022957	Itsn1
ENSMUSG00000051413	Plagl2
ENSMUSG00000027959	Sass6
ENSMUSG00000085156	Gm11974
ENSMUSG00000005107	Slc2a9
ENSMUSG00000045246	Kcng4
ENSMUSG00000020611	Gna13
ENSMUSG00000039298	Cdk5rap2
ENSMUSG00000010307	Tmem86a
ENSMUSG00000026117	Zap70
ENSMUSG00000025402	Nab2
ENSMUSG00000031028	Tub
ENSMUSG00000030268	Bcat1
ENSMUSG00000032724	Abtb2
ENSMUSG00000070942	Il1rl2
ENSMUSG00000038463	Olfml2b
ENSMUSG00000093594	Gm20707
ENSMUSG00000026778	Prkcq
ENSMUSG00000062127	Cttnbp2nl
ENSMUSG00000025178	Pi4k2a
ENSMUSG00000033033	Calhm2
ENSMUSG00000031486	Gpr124
ENSMUSG00000022754	Tmem45a
ENSMUSG00000002007	Srpk3
ENSMUSG00000024535	Snx24
ENSMUSG00000032802	Srxn1
ENSMUSG00000097415	AU020206
ENSMUSG00000028133	Rwdd3
ENSMUSG00000033355	Rtp4
ENSMUSG00000029108	Pcdh7
ENSMUSG00000038024	Dennd4c
ENSMUSG00000069792	Wfdc17
ENSMUSG00000079343	Gm5077
ENSMUSG00000019773	Fbxo5
ENSMUSG00000096544	Gm4617
ENSMUSG00000028139	Riiad1
ENSMUSG00000087943	Gm24245
ENSMUSG00000039431	Mtmr7
ENSMUSG00000030116	Mfap5
ENSMUSG00000001403	Ube2c
ENSMUSG00000024330	Col11a2
ENSMUSG00000004113	Cacna1b
ENSMUSG00000023809	Rps6ka2
ENSMUSG00000001768	Rin2
ENSMUSG00000047945	Marcksl1
ENSMUSG00000048732	Klhl11
ENSMUSG00000054000	Tusc1
ENSMUSG00000029206	Nsun7
ENSMUSG00000020553	Pctp
ENSMUSG00000025007	Aldh18a1
ENSMUSG00000036412	Arsi
ENSMUSG00000029915	Clec5a
ENSMUSG00000089991	Gm16332
ENSMUSG00000020458	Rtn4
ENSMUSG00000002233	Rhoc
ENSMUSG00000068227	Il2rb
ENSMUSG00000009731	Kcnd1
ENSMUSG00000022479	Vdr
ENSMUSG00000047986	Palm3
ENSMUSG00000022514	Il1rap
ENSMUSG00000006304	Arpc2
ENSMUSG00000037580	Gch1
ENSMUSG00000030726	Pold3
ENSMUSG00000026875	Traf1
ENSMUSG00000038034	Igsf8
ENSMUSG00000005667	Mthfd2
ENSMUSG00000041058	Wwp1
ENSMUSG00000042254	Cilp
ENSMUSG00000026430	Rassf5
ENSMUSG00000048376	F2r
ENSMUSG00000041797	Abca9
ENSMUSG00000044847	Lsm11
ENSMUSG00000070691	Runx3
ENSMUSG00000043587	Acpl2
ENSMUSG00000024399	Ltb
ENSMUSG00000028341	Nr4a3
ENSMUSG00000020886	Dlg4
ENSMUSG00000024818	Slc25a45
ENSMUSG00000071713	Csf2rb
ENSMUSG00000091492	Gm17025
ENSMUSG00000031647	Mfap3l
ENSMUSG00000035305	Ror1
ENSMUSG00000017499	Cdc6
ENSMUSG00000067599	Klra7
ENSMUSG00000046169	Adamts6
ENSMUSG00000048965	Mrgpre
ENSMUSG00000007035	Msh5
ENSMUSG00000026620	Mark1
ENSMUSG00000025283	Sat1
ENSMUSG00000033538	Casp4
ENSMUSG00000028063	Lmna
ENSMUSG00000047747	Rnf150
ENSMUSG00000098183	Gm27010
ENSMUSG00000004151	Etv1
ENSMUSG00000016206	H2-M3
ENSMUSG00000037649	H2-DMa
ENSMUSG00000001128	Cfp
ENSMUSG00000036636	Clcn7
ENSMUSG00000042712	Wbp5
ENSMUSG00000045075	Gm9796
ENSMUSG00000027035	Cers6
ENSMUSG00000025612	Bach1
ENSMUSG00000029174	Tbc1d1
ENSMUSG00000031432	Prps1
ENSMUSG00000051278	4930422G04Rik
ENSMUSG00000003546	Klc4
ENSMUSG00000007833	Aldh16a1
ENSMUSG00000037095	Lrg1
ENSMUSG00000025930	Msc
ENSMUSG00000048126	Col6a3
ENSMUSG00000038451	Spsb2
ENSMUSG00000042228	Lyn
ENSMUSG00000026443	Lrrn2
ENSMUSG00000009585	Apobec3
ENSMUSG00000021054	Sgpp1
ENSMUSG00000022575	Gsdmd
ENSMUSG00000038811	Gngt2
ENSMUSG00000052681	Rap1b
ENSMUSG00000043263	Pyhin1
ENSMUSG00000001986	Gria3
ENSMUSG00000024544	Ldlrad4
ENSMUSG00000047878	A4galt
ENSMUSG00000084797	Gm14321
ENSMUSG00000009569	Mkl2
ENSMUSG00000042500	Ago4
ENSMUSG00000034612	Chst11
ENSMUSG00000018293	Pfn1
ENSMUSG00000059479	B3gnt8
ENSMUSG00000036438	Calm2
[truncated: 2,223 more rows]

## Sheet: Fig5A_edgeR_Cre-HFDvsNC_sigDOWN
GENEID	SYMBOL
ENSMUSG00000022056	Adam7
ENSMUSG00000003051	Elf3
ENSMUSG00000031449	Atp4b
ENSMUSG00000027376	Prom2
ENSMUSG00000047021	Ccdc108
ENSMUSG00000040205	Cuzd1
ENSMUSG00000027568	Ntsr1
ENSMUSG00000031881	Cdh16
ENSMUSG00000025479	Cyp2e1
ENSMUSG00000018623	Mmp7
ENSMUSG00000028359	Orm3
ENSMUSG00000050276	Mrgprg
ENSMUSG00000060311	Mucl1
ENSMUSG00000029420	Rimbp2
ENSMUSG00000087638	Gm11773
ENSMUSG00000061780	Cfd
ENSMUSG00000016200	Syt14
ENSMUSG00000031489	Adrb3
ENSMUSG00000042096	Dao
ENSMUSG00000091575	2010016I18Rik
ENSMUSG00000047222	Ear11
ENSMUSG00000058147	Xlr3c
ENSMUSG00000030935	Acsm3
ENSMUSG00000031204	Asb12
ENSMUSG00000030317	Timp4
ENSMUSG00000028020	Glrb
ENSMUSG00000033615	Cplx1
ENSMUSG00000038064	Cldn22
ENSMUSG00000032034	Kcnj5
ENSMUSG00000022449	Adamts20
ENSMUSG00000047129	1700113H08Rik
ENSMUSG00000006345	Ggt1
ENSMUSG00000076540	Igkv4-80
ENSMUSG00000076587	Igkv6-20
ENSMUSG00000042750	Bex2
ENSMUSG00000086149	Gm15598
ENSMUSG00000007034	Slc44a4
ENSMUSG00000034227	Foxj1
ENSMUSG00000073680	Tmem88b
ENSMUSG00000086587	Gm11837
ENSMUSG00000005251	Ripk4
ENSMUSG00000075023	Accsl
ENSMUSG00000048899	Rimkla
ENSMUSG00000034467	Dynlrb2
ENSMUSG00000030757	Zkscan2
ENSMUSG00000021416	Eci3
ENSMUSG00000026227	2810459M11Rik
ENSMUSG00000046215	Rprml
ENSMUSG00000088307	Gm24505
ENSMUSG00000079654	Prrt4
ENSMUSG00000048442	Smim5
ENSMUSG00000057000	Nxf3
ENSMUSG00000022376	Adcy8
ENSMUSG00000013643	Lypd8
ENSMUSG00000027556	Car1
ENSMUSG00000039257	Vstm2b
ENSMUSG00000028177	1810013D15Rik
ENSMUSG00000050447	Lypd6
ENSMUSG00000076676	Ighv12-3
ENSMUSG00000079462	Gm15737
ENSMUSG00000035686	Thrsp
ENSMUSG00000022803	Popdc2
ENSMUSG00000021991	Cacna2d3
ENSMUSG00000081441	Gm6161
ENSMUSG00000038167	Plekhg6
ENSMUSG00000012705	Retn
ENSMUSG00000076526	Igkv12-98
ENSMUSG00000055027	Smyd1
ENSMUSG00000090486	BC035947
ENSMUSG00000027559	Car3
ENSMUSG00000031980	Agt
ENSMUSG00000048424	Ranbp3l
ENSMUSG00000022783	Spag6
ENSMUSG00000060093	Hist1h4a
ENSMUSG00000009216	Fam163b
ENSMUSG00000017300	Tnnc2
ENSMUSG00000031298	Gpr64
ENSMUSG00000025934	Gsta3
ENSMUSG00000022762	Ncam2
ENSMUSG00000031972	Acta1
ENSMUSG00000045394	Epcam
ENSMUSG00000079457	Gm7609
ENSMUSG00000056133	Gm9992
ENSMUSG00000020125	Elane
ENSMUSG00000027513	Pck1
ENSMUSG00000022949	Clic6
ENSMUSG00000023047	Amhr2
ENSMUSG00000037709	Fam13a
ENSMUSG00000089783	Gm454
ENSMUSG00000024842	Cabp4
ENSMUSG00000022039	Adam2
ENSMUSG00000025318	Jph3
ENSMUSG00000039323	Igfbp2
ENSMUSG00000067736	Gm10222
ENSMUSG00000012187	Mogat1
ENSMUSG00000032348	Gsta4
ENSMUSG00000047344	Lancl3
ENSMUSG00000033590	Myo5c
ENSMUSG00000091199	Gm2619
ENSMUSG00000090039	Gm15894
ENSMUSG00000024302	Dtna
ENSMUSG00000026387	Sctr
ENSMUSG00000029712	Actl6b
ENSMUSG00000018126	Baiap2l2
ENSMUSG00000018566	Slc2a4
ENSMUSG00000031853	BC021891
ENSMUSG00000045776	Lrtm1
ENSMUSG00000076550	Igkv4-63
ENSMUSG00000085185	BC028777
ENSMUSG00000050587	Lrrc4c
ENSMUSG00000040035	Disp2
ENSMUSG00000097613	Gm17597
ENSMUSG00000024990	Rbp4
ENSMUSG00000037490	Slc2a12
ENSMUSG00000072624	Gm5460
ENSMUSG00000068522	Aard
ENSMUSG00000024935	Slc1a1
ENSMUSG00000001773	Folh1
ENSMUSG00000085213	Gm13091
ENSMUSG00000067786	Nnat
ENSMUSG00000068762	Gstm6
ENSMUSG00000074472	Zfp872
ENSMUSG00000071847	Apcdd1
ENSMUSG00000031170	Slc38a5
ENSMUSG00000028865	Cd164l2
ENSMUSG00000035275	Raver2
ENSMUSG00000029431	B3gnt4
ENSMUSG00000019817	Plagl1
ENSMUSG00000072884	Gm10433
ENSMUSG00000030972	Acsm5
ENSMUSG00000043463	Rab9b
ENSMUSG00000003526	Prodh
ENSMUSG00000033419	Snap91
ENSMUSG00000076583	Igkv8-24
ENSMUSG00000037994	Slc9b2
ENSMUSG00000097702	Gm26739
ENSMUSG00000086726	Gm9458
ENSMUSG00000081189	Gm12725
ENSMUSG00000026525	Opn3
ENSMUSG00000078487	Ankrd65
ENSMUSG00000074461	Gm10699
ENSMUSG00000097098	9330111N05Rik
ENSMUSG00000056973	Ces1d
ENSMUSG00000055972	2810407A14Rik
ENSMUSG00000012396	Nanog
ENSMUSG00000026415	Fcamr
ENSMUSG00000052974	Cyp2f2
ENSMUSG00000044330	Gm9790
ENSMUSG00000074264	Amy1
ENSMUSG00000086417	Gm12996
ENSMUSG00000004328	Hif3a
ENSMUSG00000068748	Ptprz1
ENSMUSG00000005360	Slc1a3
ENSMUSG00000020303	Stc2
ENSMUSG00000040950	Mgl2
ENSMUSG00000053398	Phgdh
ENSMUSG00000066364	Serpina3b
ENSMUSG00000062785	Kcnc3
ENSMUSG00000069227	Gprin1
ENSMUSG00000052273	Dnah3
ENSMUSG00000015090	Ptgds
ENSMUSG00000034623	Prss55
ENSMUSG00000041202	Pla2g2d
ENSMUSG00000043633	Fam221b
ENSMUSG00000087336	Gm15860
ENSMUSG00000087648	E130018N17Rik
ENSMUSG00000036611	Eepd1
ENSMUSG00000006542	Prkag3
ENSMUSG00000025013	Tll2
ENSMUSG00000061100	Retnla
ENSMUSG00000072594	Gm16439
ENSMUSG00000057766	Ankrd29
ENSMUSG00000030087	Klf15
ENSMUSG00000049670	Morn4
ENSMUSG00000045259	Klhdc9
ENSMUSG00000042672	Dcst1
ENSMUSG00000030483	Cyp2b10
ENSMUSG00000073460	Pnldc1
ENSMUSG00000024039	Cbs
ENSMUSG00000046378	Asphd1
ENSMUSG00000025815	Dhtkd1
ENSMUSG00000029499	Pxmp2
ENSMUSG00000081824	BC002163
ENSMUSG00000090667	Gm765
ENSMUSG00000043088	Il17re
ENSMUSG00000027901	Dennd2d
ENSMUSG00000045709	1700023L04Rik
ENSMUSG00000078952	Gm2373
ENSMUSG00000025537	Phkg1
ENSMUSG00000027792	Bche
ENSMUSG00000034258	Mfsd7c
ENSMUSG00000039518	Cdsn
ENSMUSG00000051504	Siglech
ENSMUSG00000078915	Hsp25-ps1
ENSMUSG00000027221	Chst1
ENSMUSG00000001420	Tmem79
ENSMUSG00000020532	Acaca
ENSMUSG00000040136	Abcc8
ENSMUSG00000000296	Tpd52l1
ENSMUSG00000097527	1700112J16Rik
ENSMUSG00000044694	2010007H06Rik
ENSMUSG00000084960	B430010I23Rik
ENSMUSG00000050640	Tmem150c
ENSMUSG00000048142	Nat8l
ENSMUSG00000016194	Hsd11b1
ENSMUSG00000068740	Celsr2
ENSMUSG00000029370	Rassf6
ENSMUSG00000079410	Gm2897
ENSMUSG00000090145	Ugt1a6b
ENSMUSG00000085881	Gm15912
ENSMUSG00000055771	Gm7936
ENSMUSG00000022763	Aifm3
ENSMUSG00000035504	Reep6
ENSMUSG00000004558	Ndrg2
ENSMUSG00000034918	Cdhr2
ENSMUSG00000039628	Hs3st6
ENSMUSG00000086677	Gm12284
ENSMUSG00000031780	Ccl17
ENSMUSG00000054200	Ffar4
ENSMUSG00000053441	Adamts19
ENSMUSG00000028976	Slc2a5
ENSMUSG00000027446	9230104L09Rik
ENSMUSG00000085532	B430319H21Rik
ENSMUSG00000031351	Zfp185
ENSMUSG00000048138	Dmrt2
ENSMUSG00000097021	4933433G15Rik
ENSMUSG00000081967	Gm14017
ENSMUSG00000044361	BC024139
ENSMUSG00000033059	Pygb
ENSMUSG00000097383	1500026H17Rik
ENSMUSG00000042379	Esm1
ENSMUSG00000028024	Enpep
ENSMUSG00000074219	Gm10644
ENSMUSG00000039347	Atp6v0e2
ENSMUSG00000078866	Gm14420
ENSMUSG00000030800	Prss8
ENSMUSG00000063415	Cyp26b1
ENSMUSG00000052221	Ppp1r36
ENSMUSG00000075590	Nrbp2
ENSMUSG00000030664	1110006G14Rik
ENSMUSG00000058934	Gm16176
ENSMUSG00000086332	4930480G23Rik
ENSMUSG00000083424	Rpl35a-ps4
ENSMUSG00000071540	3425401B19Rik
ENSMUSG00000094910	D430019H16Rik
ENSMUSG00000085998	AW822252
ENSMUSG00000044349	Snhg11
ENSMUSG00000074743	Thbd
ENSMUSG00000050994	Adgb
ENSMUSG00000027796	Smad9
ENSMUSG00000043673	Kcns3
ENSMUSG00000039629	Strip2
ENSMUSG00000028654	Mycl
ENSMUSG00000030735	Gm9755
ENSMUSG00000027257	Pacsin3
ENSMUSG00000031725	Ces1f
ENSMUSG00000087405	Gm14232
ENSMUSG00000021069	Pygl
ENSMUSG00000087597	Gm15345
ENSMUSG00000050663	Trhde
ENSMUSG00000052629	Gm9885
ENSMUSG00000086602	Gm15609
ENSMUSG00000086679	Gm15551
ENSMUSG00000087120	Gm12279
ENSMUSG00000082068	Gm2673
ENSMUSG00000006641	Slc5a6
ENSMUSG00000097416	Gm26670
ENSMUSG00000085990	Gm16731
ENSMUSG00000021136	Smoc1
ENSMUSG00000078868	Gm14412
ENSMUSG00000025813	Homer2
ENSMUSG00000058905	Gm10051
ENSMUSG00000085095	Gm15635
ENSMUSG00000031283	Chrdl1
ENSMUSG00000055733	Nap1l3
ENSMUSG00000085211	B430219N15Rik
ENSMUSG00000084168	Atp5l2
ENSMUSG00000033022	Cdo1
ENSMUSG00000021238	Aldh6a1
ENSMUSG00000025175	Fn3k
ENSMUSG00000059027	9630013D21Rik
ENSMUSG00000054966	Ifltd1
ENSMUSG00000090785	Gm17116
ENSMUSG00000049571	9330101J02Rik
ENSMUSG00000024972	Lgals12
ENSMUSG00000062609	Kcnj15
ENSMUSG00000069917	Hba-a2
ENSMUSG00000085914	Gm14320
ENSMUSG00000042616	Oscp1
ENSMUSG00000054162	Spock3
ENSMUSG00000044724	Gpr152
ENSMUSG00000006784	Ttc25
ENSMUSG00000037735	2810032G03Rik
ENSMUSG00000039063	Echdc3
ENSMUSG00000097187	Gm19426
ENSMUSG00000040197	Cd209e
ENSMUSG00000027075	Slc43a1
ENSMUSG00000043639	Rbm20
ENSMUSG00000095159	Tubb4b-ps1
ENSMUSG00000029633	Gm5578
ENSMUSG00000085207	Gm11767
ENSMUSG00000055323	Gm9967
ENSMUSG00000025270	Alas2
ENSMUSG00000031775	Pllp
ENSMUSG00000087611	4930458D05Rik
ENSMUSG00000057729	Prtn3
ENSMUSG00000021265	Slc25a29
ENSMUSG00000025911	Adhfe1
ENSMUSG00000021255	Esrrb
ENSMUSG00000043623	4933412A08Rik
ENSMUSG00000020607	Fam84a
ENSMUSG00000083626	Gm4459
ENSMUSG00000019326	Aoc3
ENSMUSG00000074771	Ankef1
ENSMUSG00000067649	Mageb18
ENSMUSG00000025153	Fasn
ENSMUSG00000035948	Acss3
ENSMUSG00000093405	Gm20684
ENSMUSG00000029482	Aacs
ENSMUSG00000073940	Hbb-bt
ENSMUSG00000035277	Arx
ENSMUSG00000097773	Gm10614
ENSMUSG00000048240	Gng7
ENSMUSG00000097379	Gm26873
ENSMUSG00000069515	Lyz1
ENSMUSG00000042515	Mum1l1
ENSMUSG00000022878	Adipoq
ENSMUSG00000097016	Gm26708
ENSMUSG00000060445	Sycp2
ENSMUSG00000052305	Hbb-bs
ENSMUSG00000004035	Gstm7
ENSMUSG00000054619	Mettl7a1
ENSMUSG00000022987	Zfp641
ENSMUSG00000085956	4930481B07Rik
ENSMUSG00000083443	Gm15519
ENSMUSG00000024968	Rcor2
ENSMUSG00000083701	Gm4912
ENSMUSG00000089941	Gm16168
ENSMUSG00000052852	Reep1
ENSMUSG00000079559	Gm684
ENSMUSG00000085289	Gm15337
ENSMUSG00000084865	Gm15723
ENSMUSG00000039865	Slc44a3
ENSMUSG00000028601	Echdc2
ENSMUSG00000021478	Drd1a
ENSMUSG00000079364	Gm3558
ENSMUSG00000031700	Gpt2
ENSMUSG00000043999	Gpr75
ENSMUSG00000035829	Ppp1r26
ENSMUSG00000085913	Gm15601
ENSMUSG00000085151	1110018N20Rik
ENSMUSG00000085445	Gm16348
ENSMUSG00000038496	Slc19a3
ENSMUSG00000072769	Gm10419
ENSMUSG00000051844	B230319C09Rik
ENSMUSG00000050737	Ptges
ENSMUSG00000046329	Slc25a23
ENSMUSG00000009376	Met
ENSMUSG00000068706	Gm10250
ENSMUSG00000001657	Hoxc8
ENSMUSG00000057880	Abat
ENSMUSG00000022485	Hoxc5
ENSMUSG00000080836	Gm6444
ENSMUSG00000013928	Thap8
ENSMUSG00000097124	A530020G20Rik
ENSMUSG00000041750	Cd1d2
ENSMUSG00000050035	Fhl4
ENSMUSG00000079669	Gm17396
ENSMUSG00000097643	A130051J06Rik
ENSMUSG00000026567	Adcy10
ENSMUSG00000095789	Nupr1l
ENSMUSG00000040213	Ccbl2
ENSMUSG00000024371	C2
ENSMUSG00000032131	Abcg4
ENSMUSG00000030739	Myh14
ENSMUSG00000028681	Ptch2
ENSMUSG00000054556	Gm4876
ENSMUSG00000073295	Nudt11
ENSMUSG00000032531	Amotl2
ENSMUSG00000085929	Gm13421
ENSMUSG00000037071	Scd1
ENSMUSG00000040037	Negr1
ENSMUSG00000031373	Car5b
ENSMUSG00000056899	Immp2l
ENSMUSG00000030513	Pcsk6
ENSMUSG00000064202	4430402I18Rik
ENSMUSG00000086460	Gm12236
ENSMUSG00000031490	Eif4ebp1
ENSMUSG00000020010	Vnn3
ENSMUSG00000027332	Ivd
ENSMUSG00000043488	Gm9783
ENSMUSG00000042873	Lhfpl4
ENSMUSG00000097146	Gm4211
ENSMUSG00000044378	Slc15a5
ENSMUSG00000031910	Has3
ENSMUSG00000097462	9530026P05Rik
ENSMUSG00000030246	Ldhb
ENSMUSG00000041220	Elovl6
ENSMUSG00000027364	Usp50
ENSMUSG00000092124	B930094E09Rik
ENSMUSG00000048772	Tmem53
ENSMUSG00000026765	Lypd6b
ENSMUSG00000097574	C920006O11Rik
ENSMUSG00000087373	Gm15892
ENSMUSG00000060402	Chst8
ENSMUSG00000073758	Sh3d21
ENSMUSG00000097123	Gm6297
ENSMUSG00000069919	Hba-a1
ENSMUSG00000012819	Cdh23
ENSMUSG00000059173	Pde1a
ENSMUSG00000035773	Kiss1r
ENSMUSG00000036395	Glb1l2
ENSMUSG00000075225	Ccdc162
ENSMUSG00000020672	Sntg2
ENSMUSG00000054863	Fam19a5
ENSMUSG00000027762	Sucnr1
ENSMUSG00000039037	St6galnac5
ENSMUSG00000023951	Vegfa
ENSMUSG00000028150	Rorc
ENSMUSG00000006221	Hspb7
ENSMUSG00000057092	Fxyd3
ENSMUSG00000026834	Acvr1c
ENSMUSG00000036962	Gm101
ENSMUSG00000048794	Ccdc37
ENSMUSG00000038060	Dlec1
ENSMUSG00000078234	Klhdc7a
ENSMUSG00000021209	Ppp4r4
ENSMUSG00000032492	Pth1r
ENSMUSG00000032311	Nrg4
ENSMUSG00000032387	Rbpms2
ENSMUSG00000021340	Gpld1
ENSMUSG00000092569	Gm20544
ENSMUSG00000010660	Plcd1
ENSMUSG00000014503	Pkd2l2
ENSMUSG00000058297	Spock2
ENSMUSG00000038259	Gdf5
ENSMUSG00000037086	1110059M19Rik
ENSMUSG00000054659	Pm20d2
ENSMUSG00000074284	Gm10658
ENSMUSG00000025069	Gsto2
ENSMUSG00000032898	Fbxo21
ENSMUSG00000037225	Fgf2
ENSMUSG00000040165	Cd209c
ENSMUSG00000018740	Slc25a35
ENSMUSG00000029086	Prom1
ENSMUSG00000049241	Gpr81
ENSMUSG00000079465	Col4a3
ENSMUSG00000033849	B3galt2
ENSMUSG00000055980	Irs1
ENSMUSG00000069670	Nkain2
ENSMUSG00000025271	Pfkfb1
ENSMUSG00000012428	Steap4
ENSMUSG00000024646	Cyb5
ENSMUSG00000070806	Zmynd12
ENSMUSG00000034842	Art3
ENSMUSG00000022512	Cldn1
ENSMUSG00000087307	Gm12925
ENSMUSG00000097047	1110020A21Rik
ENSMUSG00000044716	Dok7
ENSMUSG00000003123	Lipe
ENSMUSG00000021763	BC067074
ENSMUSG00000018554	Ybx2
ENSMUSG00000048814	Lonrf2
ENSMUSG00000001672	Marveld3
ENSMUSG00000057068	Fam47e
ENSMUSG00000043873	Chi3l7
ENSMUSG00000031434	Morc4
ENSMUSG00000053279	Aldh1a1
ENSMUSG00000087429	Gm16235
ENSMUSG00000020431	Adcy1
ENSMUSG00000086350	B230369F24Rik
ENSMUSG00000032978	Guca2b
ENSMUSG00000085776	5430402O13Rik
ENSMUSG00000097863	1010001B22Rik
ENSMUSG00000022853	Ehhadh
ENSMUSG00000068874	Selenbp1
ENSMUSG00000020889	Nr1d1
ENSMUSG00000056602	Fry
ENSMUSG00000087397	Gm16256
ENSMUSG00000083284	Gm13688
ENSMUSG00000032584	Mst1r
ENSMUSG00000025509	Pnpla2
ENSMUSG00000078350	Smim1
ENSMUSG00000021215	Net1
ENSMUSG00000055782	Abcd2
ENSMUSG00000020251	Glt8d2
ENSMUSG00000026827	Gpd2
ENSMUSG00000087445	Gm14286
ENSMUSG00000042251	Pm20d1
ENSMUSG00000035936	Aldh5a1
ENSMUSG00000022018	Rgcc
ENSMUSG00000057614	Gnai1
ENSMUSG00000087412	Gm15501
ENSMUSG00000041878	8430432A02Rik
ENSMUSG00000086881	Gm13594
ENSMUSG00000001918	Slc1a5
ENSMUSG00000058740	Kcnt1
ENSMUSG00000031111	Igsf1
ENSMUSG00000014776	Nol3
ENSMUSG00000032500	Dclk3
ENSMUSG00000020591	Ntsr2
ENSMUSG00000084384	Gm12251
ENSMUSG00000030671	Pde3b
ENSMUSG00000086216	Gm13610
ENSMUSG00000074521	Gm14327
ENSMUSG00000085084	4930570G19Rik
ENSMUSG00000018509	Cenpv
ENSMUSG00000052392	Acot4
ENSMUSG00000022996	Wnt10b
ENSMUSG00000045802	Hsf3
ENSMUSG00000032251	Irak1bp1
ENSMUSG00000042962	Gm5436
ENSMUSG00000056214	Pard6g
ENSMUSG00000039976	Tbc1d16
ENSMUSG00000085962	Gm16984
ENSMUSG00000086448	9330162012Rik
ENSMUSG00000028551	Cdkn2c
ENSMUSG00000028393	Alad
ENSMUSG00000038522	AI317395
ENSMUSG00000098221	Gm27030
ENSMUSG00000040181	Fmo1
ENSMUSG00000044405	Adig
ENSMUSG00000032338	Hcn4
ENSMUSG00000031495	Cd209d
ENSMUSG00000022197	Pdzd2
ENSMUSG00000063628	Gm7665
ENSMUSG00000040978	Gm11992
ENSMUSG00000021474	Sfxn1
ENSMUSG00000067158	Col4a4
ENSMUSG00000032268	Tmprss5
ENSMUSG00000020566	Atp6v1c2
ENSMUSG00000029095	Ablim2
ENSMUSG00000084512	Gm22482
ENSMUSG00000051910	Sox6
ENSMUSG00000036863	Syde2
ENSMUSG00000097236	4831440E17Rik
ENSMUSG00000031605	Klhl2
ENSMUSG00000047702	Olfr1388
ENSMUSG00000064263	Gm1631
ENSMUSG00000092192	Dyx1c1
ENSMUSG00000061815	Rufy4
ENSMUSG00000040650	Cyp2b23
ENSMUSG00000033308	Dpyd
ENSMUSG00000027316	Gfra4
ENSMUSG00000073929	Trim30e-ps1
ENSMUSG00000074466	Gm15417
ENSMUSG00000097970	Gm27028
ENSMUSG00000083563	Gm13340
ENSMUSG00000021214	Akr1c18
ENSMUSG00000051166	Eml5
ENSMUSG00000019831	Wasf1
ENSMUSG00000028399	Ptprd
ENSMUSG00000000142	Axin2
ENSMUSG00000085558	4930412C18Rik
ENSMUSG00000017737	Mmp9
ENSMUSG00000079355	Ackr4
ENSMUSG00000085891	Gm14634
ENSMUSG00000043687	1190005I06Rik
ENSMUSG00000037112	Sik2
ENSMUSG00000046607	Hrk
ENSMUSG00000020090	Npffr1
ENSMUSG00000037259	Dzank1
ENSMUSG00000046532	Ar
ENSMUSG00000041426	Hibch
ENSMUSG00000081249	Gm11517
ENSMUSG00000079941	Gm11273
ENSMUSG00000075389	2810410L24Rik
ENSMUSG00000025279	Dnase1l3
ENSMUSG00000079163	Gm15498
ENSMUSG00000020930	Ccdc103
ENSMUSG00000083518	Gm9429
ENSMUSG00000052396	Mogat2
ENSMUSG00000087390	Gm7598
ENSMUSG00000024065	Ehd3
ENSMUSG00000003949	Hlf
ENSMUSG00000020867	Spata20
ENSMUSG00000021579	Lrrc14b
ENSMUSG00000029869	Ephb6
ENSMUSG00000035355	Kcnh4
ENSMUSG00000056486	Chn1
ENSMUSG00000028794	A3galt2
ENSMUSG00000028631	Kcnq4
ENSMUSG00000087221	BC037032
ENSMUSG00000027861	Casq2
ENSMUSG00000063430	Wscd2
ENSMUSG00000051652	Lrrc3
ENSMUSG00000097617	Gm10687
ENSMUSG00000093394	Gm20621
ENSMUSG00000063428	Ddo
ENSMUSG00000057265	Ccdc176
ENSMUSG00000071103	1700029J07Rik
ENSMUSG00000006378	Gcat
ENSMUSG00000057054	Inca1
ENSMUSG00000034687	Fras1
ENSMUSG00000045064	Zc2hc1c
ENSMUSG00000087020	Gm16283
ENSMUSG00000026226	Spata3
ENSMUSG00000055137	5033411D12Rik
ENSMUSG00000028789	Adc
ENSMUSG00000086268	Gm11670
ENSMUSG00000020131	Pcsk4
ENSMUSG00000085615	A330035P11Rik
ENSMUSG00000035509	Fbxl21
ENSMUSG00000044122	Proca1
ENSMUSG00000051146	Camk2n2
ENSMUSG00000008090	Fgfrl1
ENSMUSG00000046056	Sbsn
ENSMUSG00000050556	Kcnb1
ENSMUSG00000027784	Ppm1l
ENSMUSG00000087216	E130111B04Rik
ENSMUSG00000019768	Esr1
ENSMUSG00000038576	Susd4
ENSMUSG00000018411	Mapt
ENSMUSG00000097385	Gm26814
ENSMUSG00000028076	Cd1d1
ENSMUSG00000069972	Rps13-ps2
ENSMUSG00000049791	Fzd4
ENSMUSG00000086432	B430119L08Rik
ENSMUSG00000060002	Chpt1
ENSMUSG00000092021	Gbp11
ENSMUSG00000028488	Sh3gl2
ENSMUSG00000022847	Thpo
ENSMUSG00000005373	Mlxipl
ENSMUSG00000022707	Gbe1
ENSMUSG00000035283	Adrb1
ENSMUSG00000033805	Ephx4
ENSMUSG00000080904	Gm11966
ENSMUSG00000097523	1700022N22Rik
ENSMUSG00000034818	Celf5
ENSMUSG00000034532	Fbxo16
ENSMUSG00000042797	Aqp11
ENSMUSG00000035407	Kank4
ENSMUSG00000097572	Gm26797
ENSMUSG00000056476	Med12l
ENSMUSG00000021033	Gstz1
ENSMUSG00000001661	Hoxc6
ENSMUSG00000027890	Gstm4
ENSMUSG00000018868	Pnpla5
ENSMUSG00000034810	Scn7a
ENSMUSG00000033377	Palmd
ENSMUSG00000092035	Peg10
ENSMUSG00000086914	Gm16124
ENSMUSG00000097292	A230107N01Rik
ENSMUSG00000032051	Fdx1
ENSMUSG00000075394	Hoxc4
ENSMUSG00000036504	Phpt1
ENSMUSG00000015850	Adamtsl4
ENSMUSG00000085218	BB218582
ENSMUSG00000087266	Gm15991
ENSMUSG00000085315	A430018G15Rik
ENSMUSG00000053030	Spink2
ENSMUSG00000070997	1700055D18Rik
ENSMUSG00000065592	Mir145
ENSMUSG00000003872	Lin7b
ENSMUSG00000085449	Gm15520
ENSMUSG00000025610	Map3k7cl
ENSMUSG00000055737	Ghr
ENSMUSG00000055493	Epm2a
ENSMUSG00000097222	1010001N08Rik
ENSMUSG00000039196	Orm1
ENSMUSG00000085260	1700013G23Rik
ENSMUSG00000052928	Ctif
ENSMUSG00000001520	Nrip2
ENSMUSG00000040543	Pitpnm3
ENSMUSG00000046314	Stxbp6
ENSMUSG00000022223	Sdr39u1
ENSMUSG00000024845	Tmem134
ENSMUSG00000084863	Gm12523
ENSMUSG00000043993	2900052L18Rik
ENSMUSG00000014791	Elmo3
ENSMUSG00000019178	Styxl1
ENSMUSG00000011382	Dhdh
ENSMUSG00000056598	Lrrc48
ENSMUSG00000040147	Maob
ENSMUSG00000064367	mt-Nd5
ENSMUSG00000086495	Gm13778
ENSMUSG00000087252	Gm14379
ENSMUSG00000070867	Trabd2b
ENSMUSG00000065947	mt-Nd4l
ENSMUSG00000001552	Jup
ENSMUSG00000054423	Cadps
ENSMUSG00000058135	Gstm1
ENSMUSG00000030806	Stx1b
ENSMUSG00000024962	Vegfb
ENSMUSG00000030209	Grin2b
ENSMUSG00000085984	1700001G11Rik
ENSMUSG00000097276	4930525G20Rik
ENSMUSG00000061848	Gm5805
ENSMUSG00000031230	Fgf16
ENSMUSG00000030546	Plin1
ENSMUSG00000097413	A830052D11Rik
ENSMUSG00000078566	Bnip3
ENSMUSG00000037989	Wnk2
ENSMUSG00000045569	Mc2r
ENSMUSG00000086119	Gm2415
ENSMUSG00000079168	Cd209g
ENSMUSG00000046694	Fam46b
ENSMUSG00000022510	Trp63
ENSMUSG00000054181	A930012O16Rik
ENSMUSG00000024901	Peli3
ENSMUSG00000085923	Gm12781
ENSMUSG00000020704	Asic2
ENSMUSG00000087057	Gm11730
ENSMUSG00000026688	Mgst3
ENSMUSG00000040649	Rimklb
ENSMUSG00000054474	Thnsl2
ENSMUSG00000019732	Calr3
ENSMUSG00000091498	Mpc1-ps
ENSMUSG00000029752	Asns
ENSMUSG00000021957	Tkt
ENSMUSG00000034768	Asb16
ENSMUSG00000047182	Irs3
ENSMUSG00000038236	Hoxa7
ENSMUSG00000045838	A430105I19Rik
ENSMUSG00000086287	Gm15972
ENSMUSG00000085793	Lin52
ENSMUSG00000028980	H6pd
ENSMUSG00000041957	Pkp2
ENSMUSG00000024973	Hrasls5
ENSMUSG00000082396	Zfp389
ENSMUSG00000039496	Cdnf
ENSMUSG00000084830	Gm14539
ENSMUSG00000074517	Gm10710
ENSMUSG00000009394	Syn2
ENSMUSG00000026185	Igfbp5
ENSMUSG00000020331	Hcn2
ENSMUSG00000058254	Tspan7
ENSMUSG00000079659	Tmem243
ENSMUSG00000044320	1700001O22Rik
ENSMUSG00000097345	AA543186
ENSMUSG00000021061	Sptb
ENSMUSG00000028487	Bnc2
ENSMUSG00000037139	Myom3
ENSMUSG00000058966	Fam57b
ENSMUSG00000026384	Ptpn4
ENSMUSG00000005268	Prlr
ENSMUSG00000035642	Aamdc
ENSMUSG00000022099	Dmtn
ENSMUSG00000057657	Rps18-ps3
ENSMUSG00000030861	Acadsb
ENSMUSG00000022129	Dct
ENSMUSG00000038569	Rad9b
ENSMUSG00000046733	Gprc5a
ENSMUSG00000025420	Katnal2
ENSMUSG00000073209	Klf14
ENSMUSG00000066687	Zbtb16
ENSMUSG00000040729	AK129341
ENSMUSG00000049092	Gpr137c
ENSMUSG00000096988	A930029G22Rik
ENSMUSG00000004814	Ccl24
ENSMUSG00000027071	P2rx3
ENSMUSG00000040006	Ginm1
ENSMUSG00000020917	Acly
ENSMUSG00000038387	Rras
ENSMUSG00000052135	Foxo6
ENSMUSG00000055313	Pgbd1
ENSMUSG00000030499	Kctd15
ENSMUSG00000097013	Gm26710
ENSMUSG00000007655	Cav1
ENSMUSG00000054434	Tmem120b
ENSMUSG00000021411	Pxdc1
ENSMUSG00000083674	Zfp133-ps
ENSMUSG00000051851	Cxx1c
ENSMUSG00000035828	Pim3
ENSMUSG00000027489	Necab3
ENSMUSG00000030711	Sult1a1
ENSMUSG00000041794	Myrip
ENSMUSG00000059146	Ntrk3
ENSMUSG00000062456	Rpl9-ps6
ENSMUSG00000034520	Gjc1
ENSMUSG00000097867	1110054M08Rik
ENSMUSG00000079588	Tmem182
ENSMUSG00000026463	Atp2b4
ENSMUSG00000028841	Cnksr1
ENSMUSG00000028532	Cachd1
ENSMUSG00000042010	Acacb
ENSMUSG00000002831	Plin4
ENSMUSG00000017740	Slc12a5
ENSMUSG00000042340	Ctf1
ENSMUSG00000041423	Paqr6
ENSMUSG00000033882	Rbm46
ENSMUSG00000030905	Crym
ENSMUSG00000002475	Abhd3
ENSMUSG00000032482	Cspg5
ENSMUSG00000097893	1700034P13Rik
ENSMUSG00000060675	Pla2g16
ENSMUSG00000046312	AI464131
ENSMUSG00000048636	A730049H05Rik
ENSMUSG00000087129	Gm16316
ENSMUSG00000038618	Rassf7
ENSMUSG00000082031	Gm8097
ENSMUSG00000020836	Coro6
ENSMUSG00000029001	Fbxo44
ENSMUSG00000048078	Tenm4
ENSMUSG00000054978	Kbtbd13
ENSMUSG00000020096	Tbata
ENSMUSG00000097885	5031434O11Rik
ENSMUSG00000017774	Myo1c
ENSMUSG00000086006	Gm13293
ENSMUSG00000097494	4933406C10Rik
ENSMUSG00000020325	Fstl3
ENSMUSG00000031494	Cd209a
ENSMUSG00000025375	Aatk
ENSMUSG00000005947	Itgae
ENSMUSG00000085408	C530005A16Rik
ENSMUSG00000022257	Laptm4b
ENSMUSG00000067787	Blcap
ENSMUSG00000085085	1700086P04Rik
ENSMUSG00000082361	Btc
ENSMUSG00000097207	6030443J06Rik
ENSMUSG00000000340	Dbt
ENSMUSG00000091275	Gm3248
ENSMUSG00000028782	Bai2
ENSMUSG00000094628	Gm3252
ENSMUSG00000064370	mt-Cytb
ENSMUSG00000034361	Cpne2
ENSMUSG00000030095	Tmem43
ENSMUSG00000067719	Gm10221
ENSMUSG00000074171	Gm6658
ENSMUSG00000029772	Ahcyl2
ENSMUSG00000025347	Mettl7b
ENSMUSG00000018648	Dusp14
ENSMUSG00000050052	Tdrp
ENSMUSG00000037493	Cib2
ENSMUSG00000085133	B930095G15Rik
ENSMUSG00000040152	Thbs1
ENSMUSG00000040105	Ppapdc2
ENSMUSG00000004032	Gstm5
ENSMUSG00000035713	Usp35
ENSMUSG00000097177	9330159M07Rik
ENSMUSG00000021573	Tppp
ENSMUSG00000025766	D3Ertd751e
ENSMUSG00000068747	Sort1
ENSMUSG00000029864	Gstk1
ENSMUSG00000028836	Slc30a2
ENSMUSG00000038936	Sccpdh
ENSMUSG00000021466	Ptch1
ENSMUSG00000086247	Gm15787
ENSMUSG00000035342	Lzts2
ENSMUSG00000000154	Slc22a18
ENSMUSG00000038267	Slc22a23
ENSMUSG00000038816	Ctnnal1
ENSMUSG00000098076	Gm6981
ENSMUSG00000021097	Clmn
ENSMUSG00000081434	Gm14165
ENSMUSG00000006462	A530013C23Rik
ENSMUSG00000042826	Fgf11
ENSMUSG00000035615	Frmpd1
ENSMUSG00000034285	Nipsnap1
ENSMUSG00000086382	Gm13705
ENSMUSG00000029314	Agpat9
ENSMUSG00000020580	Rock2
ENSMUSG00000046764	A530053G22Rik
ENSMUSG00000069806	Cacng7
ENSMUSG00000048647	Exd1
ENSMUSG00000090622	A930033H14Rik
ENSMUSG00000003865	Gys1
ENSMUSG00000003153	Slc2a3
ENSMUSG00000060579	Fhit
ENSMUSG00000037110	Ralgapa2
ENSMUSG00000087579	1500017E21Rik
ENSMUSG00000044986	Tst
ENSMUSG00000028017	Egf
ENSMUSG00000092564	BC051226
ENSMUSG00000023064	Sncg
ENSMUSG00000090150	Acad11
ENSMUSG00000024558	Mapk4
ENSMUSG00000020682	Mmp28
ENSMUSG00000097787	2700046G09Rik
ENSMUSG00000026883	Dab2ip
ENSMUSG00000086784	Isoc2a
ENSMUSG00000061816	Myl1
ENSMUSG00000002688	Prkd1
ENSMUSG00000097339	Gm26671
ENSMUSG00000040919	4930505A04Rik
ENSMUSG00000054252	Fgfr3
ENSMUSG00000074467	Gm10702
ENSMUSG00000040570	Rundc3b
ENSMUSG00000060429	Sntb1
ENSMUSG00000032527	Pccb
ENSMUSG00000062093	Gm10110
ENSMUSG00000028182	Lrriq3
ENSMUSG00000025545	Clybl
ENSMUSG00000045007	Tubg2
ENSMUSG00000022665	Ccdc80
ENSMUSG00000064363	mt-Nd4
ENSMUSG00000023921	Mut
ENSMUSG00000072852	2310040G07Rik
ENSMUSG00000049303	Syt12
ENSMUSG00000039004	Bmp6
ENSMUSG00000064354	mt-Co2
ENSMUSG00000032135	Mcam
ENSMUSG00000032671	A930018P22Rik
ENSMUSG00000026664	Phyh
ENSMUSG00000087222	E030042O20Rik
ENSMUSG00000003070	Efna2
ENSMUSG00000042751	Nmnat2
ENSMUSG00000047905	Gm8566
ENSMUSG00000029121	Crmp1
ENSMUSG00000021414	Fam217a
ENSMUSG00000055676	Gm5069
ENSMUSG00000066361	Serpina3c
ENSMUSG00000025555	Farp1
ENSMUSG00000071181	3830408C21Rik
ENSMUSG00000097378	B230208H11Rik
ENSMUSG00000050103	Agmo
ENSMUSG00000028391	Wdr31
ENSMUSG00000034829	Nxnl1
ENSMUSG00000037003	Tenc1
ENSMUSG00000087377	AV099323
ENSMUSG00000027709	Mccc1
ENSMUSG00000057246	BC051142
ENSMUSG00000023092	Fhl1
ENSMUSG00000053353	2310001K24Rik
ENSMUSG00000022546	Gpt
ENSMUSG00000031958	Ldhd
ENSMUSG00000057098	Ebf1
ENSMUSG00000039958	Mettl20
ENSMUSG00000039246	Lyplal1
ENSMUSG00000039236	Isg20
ENSMUSG00000027223	Mapk8ip1
ENSMUSG00000038967	Pdk2
ENSMUSG00000020364	Zfp354a
ENSMUSG00000008540	Mgst1
ENSMUSG00000042073	Abhd14b
ENSMUSG00000031951	Tmem231
ENSMUSG00000037362	Nov
ENSMUSG00000021013	Ttc8
ENSMUSG00000035944	Ttc38
ENSMUSG00000038807	Rap1gap2
ENSMUSG00000042417	Ccno
ENSMUSG00000005514	Por
ENSMUSG00000019796	Lrp11
ENSMUSG00000050965	Prkca
ENSMUSG00000030278	Cidec
ENSMUSG00000020190	Mknk2
ENSMUSG00000028347	Tmeff1
ENSMUSG00000029195	Klb
ENSMUSG00000038700	Hoxb5
ENSMUSG00000054057	A930004D18Rik
ENSMUSG00000004631	Sgce
ENSMUSG00000032289	Thsd4
ENSMUSG00000086765	Gm11827
ENSMUSG00000005803	Sqrdl
ENSMUSG00000023336	Wfdc1
ENSMUSG00000041548	Hspb8
ENSMUSG00000030826	Bcat2
ENSMUSG00000056870	Gulp1
ENSMUSG00000053617	Sh3pxd2a
ENSMUSG00000090952	Gm17251
ENSMUSG00000097587	4930578M01Rik
ENSMUSG00000039903	Eva1c
ENSMUSG00000074093	Svip
ENSMUSG00000035783	Acta2
ENSMUSG00000019851	Perp
ENSMUSG00000036298	Slc2a13
ENSMUSG00000042532	Golga7b
ENSMUSG00000032827	Ppp1r9a
ENSMUSG00000017639	Rab11fip4
ENSMUSG00000021798	Ldb3
ENSMUSG00000030495	Slc7a10
ENSMUSG00000085433	Gm16001
ENSMUSG00000084880	Gm14872
ENSMUSG00000033361	Prrg3
ENSMUSG00000097747	Gm26534
ENSMUSG00000033208	S100b
ENSMUSG00000030029	Lrig1
ENSMUSG00000032942	Ucp3
ENSMUSG00000095040	1700001J03Rik
ENSMUSG00000027488	Snta1
ENSMUSG00000081485	Gm12338
ENSMUSG00000038347	Tcte2
ENSMUSG00000043122	A530016L24Rik
ENSMUSG00000022629	Kif21a
ENSMUSG00000094985	Topaz1
ENSMUSG00000079429	Mroh2a
ENSMUSG00000049858	Suox
ENSMUSG00000024376	Epb4.1l4a
ENSMUSG00000021273	Fdft1
ENSMUSG00000060981	Hist1h4h
ENSMUSG00000041189	Chrnb1
ENSMUSG00000059811	Atl2
ENSMUSG00000023861	Mpc1
ENSMUSG00000041653	Pnpla3
ENSMUSG00000030669	Calca
ENSMUSG00000087535	Zmiz1os1
ENSMUSG00000020963	Tshr
ENSMUSG00000043644	0610009L18Rik
ENSMUSG00000047528	Als2cr12
ENSMUSG00000002781	Tmem143
ENSMUSG00000000440	Pparg
ENSMUSG00000020988	L2hgdh
ENSMUSG00000020151	Ptprr
ENSMUSG00000026489	Adck3
ENSMUSG00000020656	Grhl1
ENSMUSG00000003410	Elavl3
ENSMUSG00000039670	Oxld1
ENSMUSG00000027510	Rbm38
ENSMUSG00000041650	Pcca
ENSMUSG00000051041	Olfml1
ENSMUSG00000051890	Klhdc1
ENSMUSG00000071226	Cecr2
ENSMUSG00000047821	Trim16
ENSMUSG00000028469	Npr2
ENSMUSG00000037712	Fermt2
ENSMUSG00000028088	Fmo5
ENSMUSG00000020044	Timp3
ENSMUSG00000049939	Lrrc4
ENSMUSG00000022838	Eaf2
ENSMUSG00000049404	Rarres1
ENSMUSG00000029384	2010109A12Rik
ENSMUSG00000028600	Podn
ENSMUSG00000045257	Morn2
ENSMUSG00000078716	Tmem8b
ENSMUSG00000004110	Cacna1e
ENSMUSG00000047409	Ctdspl
ENSMUSG00000056856	Jakmip3
ENSMUSG00000068742	Cry2
ENSMUSG00000034872	Gipc3
ENSMUSG00000052563	D930048N14Rik
ENSMUSG00000035863	Palm
ENSMUSG00000015653	Steap2
ENSMUSG00000029828	4921507P07Rik
ENSMUSG00000075463	4930594M22Rik
ENSMUSG00000035764	Fbxo45
ENSMUSG00000097150	Gm26513
ENSMUSG00000035878	Hykk
ENSMUSG00000055704	Gm9978
ENSMUSG00000043155	Hpdl
ENSMUSG00000022231	Sema5a
ENSMUSG00000062444	Ap3b2
ENSMUSG00000031551	Ido1
ENSMUSG00000056666	Retsat
ENSMUSG00000017314	Mpp2
ENSMUSG00000048489	8430408G22Rik
ENSMUSG00000046761	Fam83h
ENSMUSG00000027536	Chmp4c
ENSMUSG00000034903	Cobll1
ENSMUSG00000027016	Zfp385b
ENSMUSG00000000058	Cav2
ENSMUSG00000087660	B230398E01Rik
ENSMUSG00000075514	Gm13375
ENSMUSG00000086709	Gm16263
ENSMUSG00000048537	Phldb1
ENSMUSG00000022206	Npr3
ENSMUSG00000045555	Mettl24
ENSMUSG00000028518	Prkaa2
ENSMUSG00000040410	Fbxl4
ENSMUSG00000045954	Sdpr
ENSMUSG00000079164	Tlr5
ENSMUSG00000022383	Ppara
ENSMUSG00000037316	Bag4
ENSMUSG00000027314	Dll4
ENSMUSG00000050545	Fam228b
ENSMUSG00000064357	mt-Atp6
ENSMUSG00000085711	Gm15163
ENSMUSG00000029776	Hibadh
ENSMUSG00000041737	Tmem45b
ENSMUSG00000024978	Gpam
ENSMUSG00000027858	Tspan2
ENSMUSG00000038152	5033430I15Rik
ENSMUSG00000004105	Angptl2
ENSMUSG00000020639	Pfn4
ENSMUSG00000029669	Tspan12
ENSMUSG00000075706	Gpx4
ENSMUSG00000018846	Pank3
ENSMUSG00000075277	6720416L17Rik
ENSMUSG00000039103	Nexn
ENSMUSG00000063558	Aox1
ENSMUSG00000097327	E030030I06Rik
ENSMUSG00000033763	Mtss1l
ENSMUSG00000074384	AI429214
ENSMUSG00000096995	2810029C07Rik
ENSMUSG00000051984	Sec31b
ENSMUSG00000073888	Ccl27a
ENSMUSG00000038836	Agbl3
ENSMUSG00000074793	Hspa12b
ENSMUSG00000046991	Wdr27
ENSMUSG00000030170	Wnt5b
ENSMUSG00000048960	Prex2
ENSMUSG00000032392	Parp16
ENSMUSG00000074826	Gm10767
ENSMUSG00000031299	Pdha1
ENSMUSG00000086308	G630016G05Rik
ENSMUSG00000035860	Cdhr3
ENSMUSG00000096946	Gm10474
ENSMUSG00000085658	Gm15704
ENSMUSG00000074364	Ehd2
ENSMUSG00000029403	Cdkl2
ENSMUSG00000079467	Gm14966
ENSMUSG00000025407	Gli1
ENSMUSG00000040714	Klc3
ENSMUSG00000024395	Lims2
ENSMUSG00000040896	Kcnd3
ENSMUSG00000085828	Gm15612
ENSMUSG00000092335	Gm7221
ENSMUSG00000097015	Gm26705
ENSMUSG00000028573	Fggy
ENSMUSG00000042320	Prox2
ENSMUSG00000006958	Chrd
ENSMUSG00000019820	Utrn
ENSMUSG00000001558	Klhl10
ENSMUSG00000047246	Hist1h2be
ENSMUSG00000040856	Dlk1
ENSMUSG00000031534	Smim19
ENSMUSG00000097115	1810019N24Rik
ENSMUSG00000097162	2310010J17Rik
ENSMUSG00000083061	Gm12191
ENSMUSG00000093908	Gm5784
ENSMUSG00000026175	Vil1
ENSMUSG00000072653	Zfp783
ENSMUSG00000056698	Elmod3
ENSMUSG00000085945	2310014F06Rik
ENSMUSG00000051586	Mical3
ENSMUSG00000089889	0610040B10Rik
ENSMUSG00000039137	Whrn
ENSMUSG00000083621	Gm14586
ENSMUSG00000021708	Rasgrf2
ENSMUSG00000048731	Ggnbp1
ENSMUSG00000022555	Dgat1
ENSMUSG00000061601	Pclo
ENSMUSG00000033707	Lrrc24
ENSMUSG00000025359	Pmel
ENSMUSG00000092241	Gm20522
ENSMUSG00000078202	Nrarp
ENSMUSG00000087413	Gm11266
ENSMUSG00000031523	Dlc1
ENSMUSG00000042165	Gm9774
ENSMUSG00000086212	Mkln1os
ENSMUSG00000097797	Gm26901
ENSMUSG00000001761	Smo
ENSMUSG00000028758	Kif17
ENSMUSG00000033278	Ptprm
ENSMUSG00000017167	Cntnap1
ENSMUSG00000063873	Slc24a3
ENSMUSG00000078865	Gm14406
ENSMUSG00000030255	Sspn
ENSMUSG00000003531	Dgcr6
ENSMUSG00000068079	Tcf15
ENSMUSG00000018822	Sfrp5
ENSMUSG00000022096	Hr
ENSMUSG00000020150	Gamt
ENSMUSG00000026986	Hnmt
ENSMUSG00000033715	Akr1c14
ENSMUSG00000071253	Slc25a16
ENSMUSG00000019809	Pex3
ENSMUSG00000022843	Clcn2
ENSMUSG00000038344	Txlng
ENSMUSG00000099034	RP24-289J12.1
ENSMUSG00000047205	Dusp18
ENSMUSG00000038453	Srcin1
ENSMUSG00000061882	Ccdc62
ENSMUSG00000028862	Map3k6
ENSMUSG00000092675	Gm25262
ENSMUSG00000049521	Cdc42ep1
ENSMUSG00000037999	Arap2
ENSMUSG00000025791	Pgm2
ENSMUSG00000075324	Fign
ENSMUSG00000043366	Olfr78
ENSMUSG00000009905	Kdsr
ENSMUSG00000031119	Gpc4
ENSMUSG00000022181	C6
ENSMUSG00000078143	Gm17344
ENSMUSG00000078451	Ppil6
ENSMUSG00000096932	5033403F01Rik
ENSMUSG00000072553	Gm525
ENSMUSG00000000628	Hk2
ENSMUSG00000086877	A230072C01Rik
ENSMUSG00000097103	Gm2885
ENSMUSG00000036667	Fam115a
ENSMUSG00000072494	Ppp1r3e
ENSMUSG00000037315	Phf16
ENSMUSG00000029335	Bmp3
ENSMUSG00000034910	Pygo1
ENSMUSG00000027371	Fahd2a
ENSMUSG00000030532	Hddc3
ENSMUSG00000033486	Catsper2
ENSMUSG00000084844	Hoxb3os
ENSMUSG00000087626	Gm15050
ENSMUSG00000042641	Rgsl1
ENSMUSG00000026773	Pfkfb3
ENSMUSG00000036106	Prr5
ENSMUSG00000041343	Ankrd42
ENSMUSG00000087381	Gm16008
ENSMUSG00000026527	Rgs7
ENSMUSG00000078154	Gm12184
ENSMUSG00000062980	Cped1
ENSMUSG00000030498	Gas2
ENSMUSG00000054676	1600014C10Rik
ENSMUSG00000024667	Tmem216
ENSMUSG00000000811	Txnrd3
ENSMUSG00000040473	A330021E22Rik
ENSMUSG00000067878	Mtap7d3
ENSMUSG00000025170	Rab40b
ENSMUSG00000044252	Osbpl1a
ENSMUSG00000039166	Akap7
ENSMUSG00000030086	Chchd6
ENSMUSG00000023966	Rsph9
ENSMUSG00000037060	Prkcdbp
ENSMUSG00000033256	Shf
ENSMUSG00000030849	Fgfr2
ENSMUSG00000074912	Gm14207
ENSMUSG00000056900	Usp13
ENSMUSG00000086584	Gm12002
ENSMUSG00000029130	Rnf32
ENSMUSG00000001348	Acp5
ENSMUSG00000041736	Tspo
ENSMUSG00000019856	Fam184a
ENSMUSG00000074646	6430550D23Rik
ENSMUSG00000034957	Cebpa
ENSMUSG00000059395	Nkapl
ENSMUSG00000042293	Gm5617
ENSMUSG00000055560	Zfp459
ENSMUSG00000042256	Ptchd4
ENSMUSG00000087500	Gm12426
ENSMUSG00000032841	Prr5l
ENSMUSG00000035637	Grhpr
ENSMUSG00000087385	AA415398
ENSMUSG00000044676	Zfp612
ENSMUSG00000026860	Sh3glb2
ENSMUSG00000026604	Ptpn14
ENSMUSG00000042647	Acad12
ENSMUSG00000003721	Insig2
ENSMUSG00000048478	Spata33
ENSMUSG00000041930	Fam222a
ENSMUSG00000073633	Fbxo36
ENSMUSG00000043068	Fam89a
ENSMUSG00000021646	Mccc2
ENSMUSG00000030319	Cand2
ENSMUSG00000024601	Isoc1
ENSMUSG00000063060	Sox7
ENSMUSG00000085287	4833418N02Rik
ENSMUSG00000015094	Npdc1
ENSMUSG00000040043	Rbms2
ENSMUSG00000048330	Ric3
ENSMUSG00000018378	Cuedc1
ENSMUSG00000020098	Pcbd1
ENSMUSG00000023960	Enpp5
ENSMUSG00000035476	Tab3
ENSMUSG00000028085	Pet112
ENSMUSG00000051906	Cd209f
ENSMUSG00000097509	B230322F03Rik
ENSMUSG00000005951	Shpk
ENSMUSG00000060376	Bckdha
ENSMUSG00000049907	Rasl11b
ENSMUSG00000049892	Rasd1
ENSMUSG00000065987	Cd209b
ENSMUSG00000030281	Il17rc
ENSMUSG00000071723	Gspt2
ENSMUSG00000024228	Nudt12
ENSMUSG00000050014	Apol10b
ENSMUSG00000027961	Lrrc39
ENSMUSG00000044477	Zfand3
ENSMUSG00000062352	Itgb1bp1
ENSMUSG00000042041	2010003K11Rik
ENSMUSG00000075289	Carns1
ENSMUSG00000020627	Klhl29
ENSMUSG00000051590	Map3k19
ENSMUSG00000027327	1700037H04Rik
ENSMUSG00000028407	2010003O02Rik
ENSMUSG00000024892	Pcx
ENSMUSG00000005952	Trpv1
ENSMUSG00000055254	Ntrk2
ENSMUSG00000054320	Lrrc36
ENSMUSG00000043794	D830025C05Rik
ENSMUSG00000018169	Mfng
ENSMUSG00000036854	Hspb6
ENSMUSG00000055653	Gpc3
ENSMUSG00000000126	Wnt9a
ENSMUSG00000035849	Krt222
ENSMUSG00000086604	Gm15510
ENSMUSG00000092593	Gm20492
ENSMUSG00000021376	Tpmt
ENSMUSG00000030401	Rtn2
ENSMUSG00000053214	Gm9899
ENSMUSG00000028445	Enho
ENSMUSG00000022235	Cmbl
ENSMUSG00000032125	Robo4
ENSMUSG00000064358	mt-Co3
ENSMUSG00000002550	Uck1
ENSMUSG00000057716	Tmem178b
ENSMUSG00000013523	Bcas1
ENSMUSG00000041577	Prelp
ENSMUSG00000020354	Sgcd
ENSMUSG00000014245	Pigl
ENSMUSG00000029859	Epha1
ENSMUSG00000020674	Pxdn
ENSMUSG00000057751	Megf6
ENSMUSG00000094786	Gm14403
ENSMUSG00000041734	Kirrel
ENSMUSG00000062312	Erbb2
ENSMUSG00000038319	Kcnh2
ENSMUSG00000022389	Tef
ENSMUSG00000025477	Inpp5a
ENSMUSG00000034308	Sdr42e1
ENSMUSG00000051225	Fam83a
ENSMUSG00000067279	Ppp1r3c
ENSMUSG00000038886	Man2a2
ENSMUSG00000006241	Ccdc159
ENSMUSG00000038570	Fam154b
ENSMUSG00000047866	Lonp2
ENSMUSG00000033900	Map9
ENSMUSG00000028496	Mllt3
ENSMUSG00000037971	1110032A03Rik
ENSMUSG00000020014	Gm872
ENSMUSG00000070583	Fv1
ENSMUSG00000045160	Bola3
ENSMUSG00000033917	Gde1
ENSMUSG00000027378	Nphp1
ENSMUSG00000045636	Mtus1
ENSMUSG00000021662	Arhgef28
ENSMUSG00000057315	Arhgap24
ENSMUSG00000047786	Lix1
ENSMUSG00000033576	Apol6
ENSMUSG00000015970	Chdh
ENSMUSG00000036091	Hyal3
ENSMUSG00000027439	Gzf1
ENSMUSG00000085696	2700086A05Rik
ENSMUSG00000038894	Irs2
ENSMUSG00000063698	Sfxn4
ENSMUSG00000007097	Atp1a2
ENSMUSG00000086773	Gm16192
ENSMUSG00000097093	C330013E15Rik
ENSMUSG00000097055	Gm4419
ENSMUSG00000035473	Galm
ENSMUSG00000025064	Col17a1
ENSMUSG00000055546	Timd4
ENSMUSG00000020593	Lpin1
ENSMUSG00000024430	Cabyr
ENSMUSG00000097579	Gm26799
ENSMUSG00000032418	Me1
ENSMUSG00000030494	Rhpn2
ENSMUSG00000039563	2210406O10Rik
ENSMUSG00000028427	Aqp7
ENSMUSG00000032554	Trf
ENSMUSG00000032946	Rasgrp2
ENSMUSG00000059824	Dbp
ENSMUSG00000037573	Tob1
ENSMUSG00000019818	Cd164
ENSMUSG00000005763	Cd247
ENSMUSG00000046070	Igfals
ENSMUSG00000039693	Msantd3
ENSMUSG00000096935	1700113A16Rik
ENSMUSG00000046908	Ltb4r1
ENSMUSG00000050762	Prss27
ENSMUSG00000022836	Mylk
ENSMUSG00000038587	Akap12
ENSMUSG00000026617	Bpnt1
ENSMUSG00000087651	1500009L16Rik
ENSMUSG00000021835	Bmp4
ENSMUSG00000045896	Paip2b
ENSMUSG00000024664	Fads3
ENSMUSG00000033170	Card10
ENSMUSG00000030753	Prkrir
ENSMUSG00000086328	2700033N17Rik
ENSMUSG00000040938	Slc16a11
ENSMUSG00000030877	4933427G17Rik
ENSMUSG00000002059	Rab34
ENSMUSG00000031379	Pir
ENSMUSG00000022469	Rapgef3
ENSMUSG00000047454	Gphn
ENSMUSG00000032047	Acat1
ENSMUSG00000031327	Chic1
ENSMUSG00000046324	Ermp1
ENSMUSG00000022040	Ephx2
ENSMUSG00000015843	Rxrg
ENSMUSG00000048490	Nrip1
ENSMUSG00000023571	Fam132a
ENSMUSG00000023262	Acy1
ENSMUSG00000028957	Per3
ENSMUSG00000034781	Gna11
ENSMUSG00000019235	Rps6kl1
ENSMUSG00000047033	Pcdhb15
ENSMUSG00000048603	Gm9828
ENSMUSG00000036960	Clca5
ENSMUSG00000029126	Nsg1
ENSMUSG00000024866	Acy3
ENSMUSG00000064351	mt-Co1
ENSMUSG00000025262	Fam120c
ENSMUSG00000055320	Tead1
ENSMUSG00000045106	Ccdc73
ENSMUSG00000023044	Csad
ENSMUSG00000037216	Lipt1
ENSMUSG00000041609	Ccdc64
ENSMUSG00000021974	Fgf9
ENSMUSG00000071252	2210408I21Rik
ENSMUSG00000038286	Bphl
ENSMUSG00000031024	St5
ENSMUSG00000028470	Hint2
ENSMUSG00000062563	Cys1
ENSMUSG00000028125	Abca4
ENSMUSG00000030672	Mylpf
ENSMUSG00000063568	Jazf1
ENSMUSG00000042976	9930038B18Rik
ENSMUSG00000032352	Lrrc1
ENSMUSG00000001948	Spa17
ENSMUSG00000031985	Gnpat
ENSMUSG00000025006	Sorbs1
ENSMUSG00000071537	Klrg2
ENSMUSG00000030584	Dpf1
ENSMUSG00000029438	Bcl7a
ENSMUSG00000024782	Ak3
ENSMUSG00000028538	St3gal3
ENSMUSG00000073565	Prr16
ENSMUSG00000042246	Tmc7
ENSMUSG00000045467	Ttll13
ENSMUSG00000055322	Tns1
ENSMUSG00000020741	Cluh
ENSMUSG00000086644	Gm13470
ENSMUSG00000073158	9030624G23Rik
ENSMUSG00000033068	Entpd6
ENSMUSG00000023959	Clic5
ENSMUSG00000014773	Dll1
ENSMUSG00000020538	Srebf1
ENSMUSG00000051648	Kctd19
ENSMUSG00000037972	Snn
ENSMUSG00000036306	Lzts1
ENSMUSG00000075296	Aldh3b2
ENSMUSG00000001666	Ddt
ENSMUSG00000022340	Sybu
ENSMUSG00000025465	Echs1
ENSMUSG00000002908	Kcnn1
ENSMUSG00000032060	Cryab
ENSMUSG00000049807	Arhgap23
ENSMUSG00000073600	Prob1
ENSMUSG00000001583	Tnk1
ENSMUSG00000032313	AI118078
ENSMUSG00000064307	Lrrc51
ENSMUSG00000028565	Nfia
ENSMUSG00000078607	1810010H24Rik
ENSMUSG00000022236	Ropn1l
ENSMUSG00000021792	Fam213a
ENSMUSG00000034165	Ccnd3
ENSMUSG00000041429	Nthl1
ENSMUSG00000085655	Gm15952
ENSMUSG00000002997	Prkar2b
ENSMUSG00000074918	5430417L22Rik
ENSMUSG00000022037	Clu
ENSMUSG00000022490	Ppp1r1a
ENSMUSG00000072704	2700089E24Rik
ENSMUSG00000028444	Cntfr
ENSMUSG00000025092	Hspa12a
ENSMUSG00000052698	Tln2
ENSMUSG00000054582	Pabpc1l
ENSMUSG00000073609	D2hgdh
ENSMUSG00000027165	B230118H07Rik
ENSMUSG00000022425	Enpp2
ENSMUSG00000097343	9030407P20Rik
ENSMUSG00000039253	Fn3krp
ENSMUSG00000097284	4930480K23Rik
ENSMUSG00000021678	F2rl1
ENSMUSG00000032609	Klhdc8b
ENSMUSG00000044317	Gpr4
ENSMUSG00000047022	Mipol1
ENSMUSG00000075031	Hist1h2bb
ENSMUSG00000024143	Rhoq
ENSMUSG00000035835	BC005764
ENSMUSG00000000686	Abhd15
ENSMUSG00000097290	1300002E11Rik
ENSMUSG00000033585	Ndn
ENSMUSG00000026278	Bok
ENSMUSG00000000876	Pxmp4
ENSMUSG00000020434	4921536K21Rik
ENSMUSG00000020156	Mum1
ENSMUSG00000046727	Cystm1
ENSMUSG00000097324	Mir143hg
ENSMUSG00000028949	Smarcd3
ENSMUSG00000045100	Slc25a26
ENSMUSG00000030545	Pex11a
ENSMUSG00000049086	Bmyc
ENSMUSG00000062929	Cfl2
ENSMUSG00000045790	Ccdc149
ENSMUSG00000023828	Slc22a3
ENSMUSG00000051951	Xkr4
ENSMUSG00000033577	Myo6
ENSMUSG00000033029	1700088E04Rik
ENSMUSG00000037833	Sh2d4b
ENSMUSG00000021253	Tgfb3
ENSMUSG00000071658	Gng3
ENSMUSG00000037010	Apln
ENSMUSG00000074824	Rslcan18
ENSMUSG00000023348	Trip6
ENSMUSG00000060487	Samd5
ENSMUSG00000020154	Ptprb
ENSMUSG00000061130	Ppm1b
ENSMUSG00000051627	Hist1h1e
ENSMUSG00000047446	Arl4a
ENSMUSG00000005836	Gata6
ENSMUSG00000031545	Agpat6
ENSMUSG00000027999	Pla2g12a
ENSMUSG00000022994	Adcy6
ENSMUSG00000096959	4930509G22Rik
ENSMUSG00000094840	A630081J09Rik
ENSMUSG00000085171	D830026I12Rik
ENSMUSG00000039646	Vasn
ENSMUSG00000092683	Gm25747
ENSMUSG00000020926	Adam11
ENSMUSG00000087644	Gm14703
ENSMUSG00000022964	Tmem50b
ENSMUSG00000044937	BC030307
ENSMUSG00000040594	Ranbp17
ENSMUSG00000024340	Btnl2
ENSMUSG00000031750	Il34
ENSMUSG00000029469	Ift81
ENSMUSG00000053329	D10Jhu81e
ENSMUSG00000039461	Tcta
ENSMUSG00000029673	Auts2
ENSMUSG00000036492	Rnf39
ENSMUSG00000031723	Txnl4b
ENSMUSG00000019082	Slc25a22
ENSMUSG00000066456	Hmgn3
ENSMUSG00000022622	Acr
ENSMUSG00000048371	Pdp2
ENSMUSG00000028944	Prkag2
ENSMUSG00000035640	Dos
ENSMUSG00000098882	mmu-mir-6392
ENSMUSG00000020847	Rph3al
ENSMUSG00000086003	B230206L02Rik
ENSMUSG00000036144	Meox2
ENSMUSG00000028996	Rbp7
ENSMUSG00000033722	BC034090
ENSMUSG00000037787	Apopt1
ENSMUSG00000004098	Col5a3
ENSMUSG00000097431	Gm26782
ENSMUSG00000026203	Dnajb2
ENSMUSG00000030747	Dgat2
ENSMUSG00000086158	Gm5918
ENSMUSG00000085829	Gm4285
ENSMUSG00000031563	Wwc2
ENSMUSG00000024640	Psat1
ENSMUSG00000051236	Msrb3
ENSMUSG00000038594	Cep85l
ENSMUSG00000004947	Dtx2
ENSMUSG00000037710	Cisd1
ENSMUSG00000049811	Fam161a
ENSMUSG00000020083	2010107G23Rik
ENSMUSG00000027713	1810062G17Rik
ENSMUSG00000058246	Gm10037
ENSMUSG00000052125	F730043M19Rik
ENSMUSG00000016128	Stard13
ENSMUSG00000062515	Fabp4
ENSMUSG00000078816	Prkcg
ENSMUSG00000032850	Rnft2
ENSMUSG00000058690	Ccser2
ENSMUSG00000058317	Ube2e2
ENSMUSG00000026107	Nabp1
ENSMUSG00000041679	Lrrc29
ENSMUSG00000030313	Dennd5b
ENSMUSG00000023150	Ivns1abp
ENSMUSG00000047617	BC029214
ENSMUSG00000027984	Hadh
ENSMUSG00000028871	Rspo1
ENSMUSG00000038180	Spag4
ENSMUSG00000007989	Fzd3
ENSMUSG00000062646	Ganc
ENSMUSG00000035121	Neil2
ENSMUSG00000048218	Amigo2
ENSMUSG00000026385	Dbi
ENSMUSG00000020135	Apc2
ENSMUSG00000043770	Gm12481
ENSMUSG00000006445	Epha2
ENSMUSG00000021597	Ankrd32
ENSMUSG00000025260	Hsd17b10
ENSMUSG00000036570	Fxyd1
ENSMUSG00000086610	Gm15408
ENSMUSG00000097616	1110019D14Rik
ENSMUSG00000049038	Mterfd3
ENSMUSG00000020335	Zfp354b
ENSMUSG00000010911	Apip
ENSMUSG00000028383	Hsdl2
ENSMUSG00000054083	Capn12
ENSMUSG00000030787	Lyve1
ENSMUSG00000026670	Uap1
ENSMUSG00000057176	Gm166
ENSMUSG00000032702	Kank1
ENSMUSG00000035105	Egln3
ENSMUSG00000097316	Gm10516
ENSMUSG00000047656	Trpt1
ENSMUSG00000051502	Ufsp1
ENSMUSG00000025510	Cd151
ENSMUSG00000031357	Syap1
ENSMUSG00000041625	Ggact
ENSMUSG00000053358	Gm9905
ENSMUSG00000018339	Gpx3
ENSMUSG00000089984	Fbxo24
ENSMUSG00000018906	P4ha2
ENSMUSG00000001143	Lman2l
ENSMUSG00000071757	Zhx2
ENSMUSG00000032826	Ank2
ENSMUSG00000025257	Ribc1
ENSMUSG00000001864	Aif1l
ENSMUSG00000097658	Gm16755
ENSMUSG00000024899	Papss2
ENSMUSG00000036214	Znrd1as
ENSMUSG00000079499	6530402F18Rik
ENSMUSG00000085042	2010001M06Rik
ENSMUSG00000026558	Uck2
ENSMUSG00000052565	Hist1h1d
ENSMUSG00000020467	Efemp1
ENSMUSG00000021732	Fgf10
ENSMUSG00000040562	Gstm2
ENSMUSG00000029456	Acad10
ENSMUSG00000086392	A330050B17Rik
ENSMUSG00000018678	Sp2
ENSMUSG00000029851	Fam115c
ENSMUSG00000044968	Napepld
ENSMUSG00000036278	Macrod1
ENSMUSG00000055866	Per2
ENSMUSG00000035085	1700020L24Rik
ENSMUSG00000028792	Ak2
ENSMUSG00000096974	Gm26881
ENSMUSG00000022324	Matn2
ENSMUSG00000021094	Dhrs7
ENSMUSG00000035413	Tmem98
ENSMUSG00000087138	Gm15545
ENSMUSG00000036879	Phkb
ENSMUSG00000098132	Rassf10
ENSMUSG00000030337	Vamp1
ENSMUSG00000040841	Six5
ENSMUSG00000097487	Ptges3l
ENSMUSG00000026879	Gsn
ENSMUSG00000026858	Fam73b
ENSMUSG00000015957	Wnt11
ENSMUSG00000032965	Ift57
ENSMUSG00000048486	Fitm2
ENSMUSG00000023826	Park2
ENSMUSG00000086657	4921530L18Rik
ENSMUSG00000066057	Gm1976
ENSMUSG00000025656	Arhgef9
ENSMUSG00000079037	Prnp
ENSMUSG00000030630	Fah
ENSMUSG00000074227	Spint2
ENSMUSG00000021070	Bdkrb2
ENSMUSG00000039652	Cpeb3
ENSMUSG00000021748	Pdhb
ENSMUSG00000064105	Cnnm2
ENSMUSG00000091994	E130317F20Rik
ENSMUSG00000070476	Fam217b
ENSMUSG00000022982	Sod1
ENSMUSG00000064120	Mocs1
ENSMUSG00000026692	Fmo4
ENSMUSG00000022893	Adamts1
ENSMUSG00000028701	Lurap1
ENSMUSG00000038022	Fam188b
ENSMUSG00000090118	Gm16163
ENSMUSG00000032375	Aph1b
ENSMUSG00000032452	Clstn2
ENSMUSG00000039682	Lap3
ENSMUSG00000022365	Derl1
ENSMUSG00000057802	Gm10030
ENSMUSG00000036111	Lmo1
ENSMUSG00000022199	Slc22a17
ENSMUSG00000078695	Cisd3
ENSMUSG00000037455	Slc18b1
ENSMUSG00000021806	Nid2
ENSMUSG00000026064	Ptp4a1
ENSMUSG00000097566	A930024N18Rik
ENSMUSG00000001663	Gstt1
ENSMUSG00000027377	Mall
ENSMUSG00000024158	Hagh
ENSMUSG00000028690	Mmachc
ENSMUSG00000033526	Ppip5k1
ENSMUSG00000029312	Klhl8
ENSMUSG00000035441	Myo1d
ENSMUSG00000091243	Vgll3
ENSMUSG00000050064	Zfp697
ENSMUSG00000032309	Fbxo22
ENSMUSG00000020900	Myh10
ENSMUSG00000033152	Podxl2
ENSMUSG00000024913	Lrp5
ENSMUSG00000039741	Bahcc1
ENSMUSG00000006526	Tmem110
ENSMUSG00000048402	Gli2
ENSMUSG00000040370	Lyrm5
ENSMUSG00000043487	Acot6
ENSMUSG00000089665	Fcor
ENSMUSG00000044167	Foxo1
ENSMUSG00000036782	Klhl13
ENSMUSG00000022671	Mzt2
ENSMUSG00000033060	Lmo7
ENSMUSG00000070527	Mkrn3
ENSMUSG00000022217	Emc9
ENSMUSG00000023328	Ache
ENSMUSG00000026626	Ppp2r5a
ENSMUSG00000001891	Ugp2
ENSMUSG00000035245	Eogt
ENSMUSG00000048550	Thnsl1
ENSMUSG00000027428	Rbbp9
ENSMUSG00000055862	Izumo4
ENSMUSG00000054945	Gm9958
ENSMUSG00000042485	Mustn1
ENSMUSG00000032714	Syde1
ENSMUSG00000038914	Dido1
ENSMUSG00000086889	Gm8619
ENSMUSG00000072875	Gpr27
ENSMUSG00000068270	Shroom4
ENSMUSG00000061838	Suclg2
ENSMUSG00000097121	D130020L05Rik
ENSMUSG00000020183	Cpm
ENSMUSG00000024053	Emilin2
ENSMUSG00000022579	Gpihbp1
ENSMUSG00000070280	Slc22a14
ENSMUSG00000054021	Sirt5
ENSMUSG00000051977	Prdm9
ENSMUSG00000020698	Cct6b
ENSMUSG00000002308	Cd320
ENSMUSG00000031093	Dock11
ENSMUSG00000022323	Hrsp12
ENSMUSG00000064345	mt-Nd2
ENSMUSG00000032058	Ppp2r1b
ENSMUSG00000037406	Htra4
ENSMUSG00000026826	Nr4a2
ENSMUSG00000053070	9230110C19Rik
ENSMUSG00000034194	R3hcc1
ENSMUSG00000039910	Cited2
ENSMUSG00000029190	D5Ertd579e
ENSMUSG00000097730	Gm26588
ENSMUSG00000024132	Eci1
ENSMUSG00000013150	Gfod2
ENSMUSG00000022466	Rpap3
ENSMUSG00000043542	Zc2hc1a
ENSMUSG00000053080	2700081O15Rik
ENSMUSG00000036817	Sun1
ENSMUSG00000036533	Cdc42ep3
ENSMUSG00000021785	Ngly1
ENSMUSG00000024727	Trpm6
ENSMUSG00000013076	Amotl1
ENSMUSG00000026576	Atp1b1
ENSMUSG00000031955	Bcar1
ENSMUSG00000029094	Afap1
ENSMUSG00000038422	Hdhd3
ENSMUSG00000020357	Flt4
ENSMUSG00000043153	Ispd
ENSMUSG00000026096	Osgepl1
ENSMUSG00000027177	Hipk3
ENSMUSG00000089875	Etohd2
ENSMUSG00000000184	Ccnd2
ENSMUSG00000039943	Plcb4
ENSMUSG00000097000	Gm17435
ENSMUSG00000044068	Zrsr1
ENSMUSG00000018428	Akap1
ENSMUSG00000044033	Ccdc141
ENSMUSG00000028603	Scp2
ENSMUSG00000039197	Adk
ENSMUSG00000030516	Tjp1
ENSMUSG00000062960	Kdr
ENSMUSG00000026893	Gca
ENSMUSG00000051243	Islr2
ENSMUSG00000030782	Tgfb1i1
ENSMUSG00000078861	Zfp931
ENSMUSG00000014077	Chp1
ENSMUSG00000033773	Rpap2
ENSMUSG00000028080	Lrba
ENSMUSG00000093661	Eif4e3
ENSMUSG00000085704	4921531C22Rik
ENSMUSG00000083863	Gm13341
ENSMUSG00000039620	6430573F11Rik
ENSMUSG00000010476	Ebf3
ENSMUSG00000026701	Prdx6
ENSMUSG00000042745	Id1
ENSMUSG00000039763	Dnajc28
ENSMUSG00000027187	Cat
ENSMUSG00000025762	Larp1b
ENSMUSG00000026678	Rgs5
ENSMUSG00000005981	Trap1
ENSMUSG00000015016	Acsf3
ENSMUSG00000046798	Cldn12
ENSMUSG00000070371	Prss36
ENSMUSG00000051391	Ywhag
ENSMUSG00000000197	Nalcn
ENSMUSG00000060803	Gstp1
ENSMUSG00000040511	Pvr
ENSMUSG00000026398	Nr5a2
ENSMUSG00000044792	Isca1
ENSMUSG00000046714	Foxc2
ENSMUSG00000045620	Odf3l1
ENSMUSG00000051169	Rpusd3
ENSMUSG00000025558	Dock9
ENSMUSG00000022337	Emc2
ENSMUSG00000075511	1700001L05Rik
ENSMUSG00000032184	Lysmd2
ENSMUSG00000035000	Dpp4
ENSMUSG00000070509	Rgma
ENSMUSG00000029020	Mfn2
ENSMUSG00000002980	Bcam
ENSMUSG00000032413	Rasa2
ENSMUSG00000049321	Zfp2
ENSMUSG00000017493	Igfbp4
ENSMUSG00000045211	Nudt18
ENSMUSG00000025525	Apool
ENSMUSG00000018750	Zbtb4
ENSMUSG00000030108	Slc6a13
ENSMUSG00000038253	Hoxa5
ENSMUSG00000066175	2510046G10Rik
ENSMUSG00000031292	Cdkl5
ENSMUSG00000026649	1700009P17Rik
ENSMUSG00000035900	Gramd4
ENSMUSG00000087165	2010001A14Rik
ENSMUSG00000025231	Sufu
ENSMUSG00000003863	Ppfia3
ENSMUSG00000027546	Atp9a
ENSMUSG00000054920	Klhl5
ENSMUSG00000045031	Cetn4
ENSMUSG00000017309	Cd300lg
ENSMUSG00000027313	Chac1
ENSMUSG00000025939	Ube2w
ENSMUSG00000027357	Crls1
ENSMUSG00000020380	Rad50
ENSMUSG00000046230	Vps13a
ENSMUSG00000027605	Acss2
ENSMUSG00000030088	Aldh1l1
ENSMUSG00000054074	Skida1
ENSMUSG00000046603	Tcaim
ENSMUSG00000048915	Efna5
ENSMUSG00000029228	Lnx1
ENSMUSG00000021846	Peli2
ENSMUSG00000030103	Bhlhe40
ENSMUSG00000032263	Bckdhb
ENSMUSG00000031144	Syp
ENSMUSG00000037606	Osbpl5
ENSMUSG00000037887	Dusp8
ENSMUSG00000032036	Kirrel3
ENSMUSG00000068686	Cd59b
ENSMUSG00000020427	Igfbp3
ENSMUSG00000067924	Cxx1b
ENSMUSG00000019791	Hint3
ENSMUSG00000032606	Nicn1
ENSMUSG00000043140	Tmem186
ENSMUSG00000030189	Ybx3
ENSMUSG00000038065	2410066E13Rik
ENSMUSG00000038663	Fsd2
ENSMUSG00000066235	Pomgnt2
ENSMUSG00000031196	F8
ENSMUSG00000025504	Eps8l2
ENSMUSG00000022354	Ndufb9
ENSMUSG00000021779	Thrb
ENSMUSG00000097251	5033417F24Rik
ENSMUSG00000087305	A430035B10Rik
ENSMUSG00000000632	Sez6
ENSMUSG00000091050	9330020H09Rik
ENSMUSG00000035885	Cox8a
ENSMUSG00000054939	Zfp174
ENSMUSG00000097397	Gm16861
ENSMUSG00000026471	Mr1
ENSMUSG00000038550	Gm129
ENSMUSG00000029386	Tctn2
ENSMUSG00000084925	1810062O18Rik
ENSMUSG00000022894	Adamts5
ENSMUSG00000030411	Nova2
ENSMUSG00000026421	Csrp1
ENSMUSG00000032285	Dnaja4
ENSMUSG00000033174	Mgll
ENSMUSG00000038984	Tspyl5
ENSMUSG00000020284	1810043G02Rik
ENSMUSG00000025736	Jmjd8
ENSMUSG00000053886	Sh2d4a
ENSMUSG00000033955	Tnks1bp1
ENSMUSG00000018659	Pnpo
ENSMUSG00000059970	Hspa2
ENSMUSG00000025764	Phf17
ENSMUSG00000039701	Usp53
ENSMUSG00000053411	Cbx7
ENSMUSG00000015224	Cyp2j9
ENSMUSG00000031530	Dusp4
ENSMUSG00000030340	Scnn1a
ENSMUSG00000087578	Gm15605
ENSMUSG00000034858	Fam214a
ENSMUSG00000025732	Fam195a
ENSMUSG00000033906	Zdhhc15
ENSMUSG00000035126	Wdr78
ENSMUSG00000021241	Isca2
ENSMUSG00000087574	C030037D09Rik
ENSMUSG00000059060	Rad51b
ENSMUSG00000071856	Mcc
ENSMUSG00000020315	Sptbn1
ENSMUSG00000055407	Map6
ENSMUSG00000021611	Tert
ENSMUSG00000062619	2310039H08Rik
ENSMUSG00000020846	Fam101b
ENSMUSG00000097320	C630016N16Rik
ENSMUSG00000027030	Stk39
ENSMUSG00000030979	Uros
ENSMUSG00000020334	Slc22a4
ENSMUSG00000027002	Nckap1
ENSMUSG00000001507	Itga3
ENSMUSG00000046275	Tusc5
ENSMUSG00000026923	Notch1
ENSMUSG00000032192	Gnb5
ENSMUSG00000025893	Kbtbd3
ENSMUSG00000064341	mt-Nd1
ENSMUSG00000009614	Sardh
ENSMUSG00000030917	Tmem159
ENSMUSG00000000439	Mkrn2
ENSMUSG00000026189	Pecr
ENSMUSG00000039713	Plekhg5
ENSMUSG00000029830	Svopl
ENSMUSG00000064215	Ifi27
ENSMUSG00000042190	Cmklr1
ENSMUSG00000038489	Polr2l
ENSMUSG00000003534	Ddr1
ENSMUSG00000039826	Trub2
ENSMUSG00000000934	Top1mt
ENSMUSG00000086714	0610009E02Rik
ENSMUSG00000070643	Sox13
ENSMUSG00000035064	Eef2k
ENSMUSG00000040339	Fam102b
ENSMUSG00000076617	Ighm
ENSMUSG00000031790	Mmp15
ENSMUSG00000026027	Stradb
ENSMUSG00000039018	Mtg1
ENSMUSG00000032649	Colgalt2
ENSMUSG00000024645	Timm21
ENSMUSG00000020085	Aifm2
ENSMUSG00000022053	Ebf2
ENSMUSG00000097080	1700086O06Rik
ENSMUSG00000020696	Rffl
ENSMUSG00000062012	Zfp13
ENSMUSG00000015846	Rxra
ENSMUSG00000032340	Neo1
ENSMUSG00000025277	Abhd6
ENSMUSG00000005534	Insr
ENSMUSG00000032010	Usp2
ENSMUSG00000029455	Aldh2
ENSMUSG00000020534	Shmt1
ENSMUSG00000037440	Vnn1
ENSMUSG00000058756	Thra
ENSMUSG00000022562	Oplah
ENSMUSG00000025738	Fbxl16
ENSMUSG00000031286	Glt28d2
ENSMUSG00000030410	Dmwd
ENSMUSG00000025817	Nudt5
ENSMUSG00000089682	Bcl2l2
ENSMUSG00000042524	Sun2
ENSMUSG00000087403	2900056M20Rik
ENSMUSG00000070495	Ctcfl
ENSMUSG00000045333	Zfp423
ENSMUSG00000062054	Iah1
ENSMUSG00000039917	Rhbdd2
ENSMUSG00000039081	Zfp503
ENSMUSG00000022941	Ripply3
ENSMUSG00000027806	Tsc22d2
ENSMUSG00000074024	4632427E13Rik
ENSMUSG00000050945	Zfp438
ENSMUSG00000024421	Lama3
ENSMUSG00000042857	Gm9776
ENSMUSG00000030094	Xpc
ENSMUSG00000038949	Cnst
ENSMUSG00000022564	Grina
ENSMUSG00000016493	Cd46
ENSMUSG00000025486	Sirt3
ENSMUSG00000053110	Yap1
ENSMUSG00000027495	Fam210b
ENSMUSG00000028683	Eif2b3
ENSMUSG00000031137	Fgf13
ENSMUSG00000052371	1700109F18Rik
ENSMUSG00000044080	S100a1
ENSMUSG00000035376	Ptplb
ENSMUSG00000073700	Klhl21
ENSMUSG00000025780	Itih5
ENSMUSG00000054723	Vmac
ENSMUSG00000050248	Evc2
ENSMUSG00000003464	Pex19
ENSMUSG00000027618	Nfs1
ENSMUSG00000038637	Lrrc56
ENSMUSG00000070315	4930581F22Rik
ENSMUSG00000025608	Podxl
ENSMUSG00000078867	Gm14418
ENSMUSG00000089829	Gm16565
ENSMUSG00000084808	9430091E24Rik
ENSMUSG00000063382	Bcl9l
ENSMUSG00000069237	C78339
ENSMUSG00000032038	St3gal4
ENSMUSG00000022178	Ajuba
ENSMUSG00000053907	Mat2a
ENSMUSG00000052934	Fbxo31
ENSMUSG00000030309	Caprin2
ENSMUSG00000047242	Taf9b
ENSMUSG00000050677	Ccdc96
ENSMUSG00000020634	Ubxn2a
ENSMUSG00000051703	Tmem198
ENSMUSG00000024654	Asrgl1
ENSMUSG00000042942	Greb1l
ENSMUSG00000030409	Dmpk
ENSMUSG00000020937	Plcd3
ENSMUSG00000002346	Slc25a42
ENSMUSG00000031782	Coq9
ENSMUSG00000015536	Mocs2
ENSMUSG00000007872	Id3
ENSMUSG00000022940	Pigp
ENSMUSG00000056162	Cndp1
ENSMUSG00000087380	2210408F21Rik
ENSMUSG00000044328	Trp53i13
ENSMUSG00000021294	Kif26a
ENSMUSG00000051736	Fam229b
ENSMUSG00000038425	Poli
ENSMUSG00000033096	Apmap
ENSMUSG00000021552	Gkap1
ENSMUSG00000033182	Kbtbd12
ENSMUSG00000028910	Mecr
[truncated: 2,381 more rows]

## Sheet: Fig5A_edgeR_Creneg_HFDvsNC_all
GENEID	SYMBOL	logFC	logCPM	F	PValue	FDR
ENSMUSG00000021306	Gpr137b	2.20777	5.88841	252.592	1.13739e-12	9.24492e-09
ENSMUSG00000034854	Mfsd12	2.45621	7.31311	242.659	1.64033e-12	9.24492e-09
ENSMUSG00000018167	Stard3	1.22345	5.29178	266.048	7.07191e-13	9.24492e-09
ENSMUSG00000026437	Cdk18	3.57911	5.84094	231.896	3.15064e-12	1.06542e-08
ENSMUSG00000031266	Gla	2.44937	5.03468	227.468	2.95272e-12	1.06542e-08
ENSMUSG00000033467	Crlf2	1.26729	5.31758	216.972	4.52893e-12	1.10755e-08
ENSMUSG00000046711	Hmga1	2.53117	5.6133	218.722	4.58533e-12	1.10755e-08
ENSMUSG00000026956	Uap1l1	2.1875	5.96902	210.867	5.86003e-12	1.23852e-08
ENSMUSG00000052688	5430435G22Rik	2.88118	6.76007	208.024	7.72578e-12	1.29459e-08
ENSMUSG00000072812	Ahnak2	2.5486	6.1568	183.476	2.33139e-11	1.29459e-08
ENSMUSG00000050022	Amz1	1.97468	3.6825	205.978	7.23881e-12	1.29459e-08
ENSMUSG00000032076	Cadm1	3.85454	5.56043	184.91	2.39289e-11	1.29459e-08
ENSMUSG00000001270	Ckb	1.8327	7.40302	187.06	1.7167e-11	1.29459e-08
ENSMUSG00000028111	Ctsk	3.53399	7.28532	189.763	1.87408e-11	1.29459e-08
ENSMUSG00000000881	Dlg3	1.61721	4.80669	180.58	2.35034e-11	1.29459e-08
ENSMUSG00000003812	Dnase2a	2.22079	6.07987	188.285	1.66738e-11	1.29459e-08
ENSMUSG00000020661	Dnmt3a	1.88139	6.7666	182.646	2.12401e-11	1.29459e-08
ENSMUSG00000026796	Fam129b	2.0181	8.14856	191.212	1.41098e-11	1.29459e-08
ENSMUSG00000032643	Fhl3	1.5886	4.494	191.771	1.37463e-11	1.29459e-08
ENSMUSG00000022831	Hcls1	2.08221	6.52444	180.291	2.38417e-11	1.29459e-08
ENSMUSG00000029919	Hpgds	4.0549	6.06841	201.883	1.10253e-11	1.29459e-08
ENSMUSG00000027239	Mdk	2.76488	2.72529	180.881	2.31585e-11	1.29459e-08
ENSMUSG00000030218	Mgp	2.24297	7.71196	181.505	2.24587e-11	1.29459e-08
ENSMUSG00000003363	Pld3	2.45896	8.18332	184.383	1.95223e-11	1.29459e-08
ENSMUSG00000050721	Plekho2	2.10468	7.35908	178.29	2.63284e-11	1.29459e-08
ENSMUSG00000017754	Pltp	2.14196	9.62135	181.232	2.27619e-11	1.29459e-08
ENSMUSG00000043895	S1pr2	2.25461	5.3217	185.694	1.88864e-11	1.29459e-08
ENSMUSG00000019558	Slc6a8	1.88344	6.41799	194.699	1.20026e-11	1.29459e-08
ENSMUSG00000032870	Smap2	1.36818	6.19853	178.192	2.64571e-11	1.29459e-08
ENSMUSG00000061288	Taok3	1.75827	5.88226	181.748	2.21932e-11	1.29459e-08
ENSMUSG00000001750	Tcirg1	2.34792	7.64586	181.658	2.22917e-11	1.29459e-08
ENSMUSG00000026627	Tmem206	2.18316	4.29444	193.024	1.29679e-11	1.29459e-08
ENSMUSG00000026321	Tnfrsf11a	2.56244	5.08947	180.605	2.67983e-11	1.29459e-08
ENSMUSG00000021038	Vipas39	1.17879	5.67989	179.582	2.46915e-11	1.29459e-08
ENSMUSG00000039474	Wfs1	2.13715	6.90447	194.616	1.20482e-11	1.29459e-08
ENSMUSG00000021458	2010111I01Rik	1.85005	5.77505	174.669	3.15884e-11	1.30267e-08
ENSMUSG00000041362	4930506M07Rik	2.11442	5.64594	175.204	3.15303e-11	1.30267e-08
ENSMUSG00000071714	Csf2rb2	1.95538	6.29237	175.301	3.05928e-11	1.30267e-08
ENSMUSG00000040035	Disp2	-2.61508	2.536	175.575	3.01711e-11	1.30267e-08
ENSMUSG00000000278	Scpep1	1.53265	7.10307	177	2.80825e-11	1.30267e-08
ENSMUSG00000034993	Vat1	1.49828	8.57622	175.075	3.09455e-11	1.30267e-08
ENSMUSG00000045216	Hs6st1	1.19906	6.17165	173.458	3.35979e-11	1.35255e-08
ENSMUSG00000037894	H2afz	1.12551	6.0789	171.007	3.8112e-11	1.47813e-08
ENSMUSG00000078485	Plekhn1	1.22486	5.75657	170.828	3.84657e-11	1.47813e-08
ENSMUSG00000024696	Lpxn	2.88059	5.05846	173.884	4.03801e-11	1.51721e-08
ENSMUSG00000042759	Apobr	2.16699	5.73175	167.623	4.89791e-11	1.56253e-08
ENSMUSG00000015396	Cd83	2.60867	5.50015	169.951	4.81832e-11	1.56253e-08
ENSMUSG00000031740	Mmp2	2.5498	7.45669	169.544	4.53236e-11	1.56253e-08
ENSMUSG00000025582	Nptx1	5.31371	1.89363	166.579	4.80575e-11	1.56253e-08
ENSMUSG00000029470	P2rx4	1.66969	7.05347	167.429	4.59456e-11	1.56253e-08
ENSMUSG00000034006	Pqlc1	1.33745	5.11487	168.303	4.38804e-11	1.56253e-08
ENSMUSG00000071708	Sms	1.57868	3.91795	168.153	4.4228e-11	1.56253e-08
ENSMUSG00000022415	Syngr1	3.12314	4.33977	170.37	4.71099e-11	1.56253e-08
ENSMUSG00000036046	5031439G07Rik	1.80942	7.34051	165.472	5.09723e-11	1.596e-08
ENSMUSG00000028789	Adc	-1.43891	4.39511	163.748	5.59021e-11	1.71853e-08
ENSMUSG00000029552	Tes	1.6521	4.57034	161.653	6.26144e-11	1.89051e-08
ENSMUSG00000018008	Cyth4	2.57029	7.63311	162.863	6.4894e-11	1.92496e-08
ENSMUSG00000035914	Cd276	1.77699	3.53844	157.857	7.71615e-11	1.97674e-08
ENSMUSG00000053063	Clec12a	3.61271	6.63804	162.66	7.33554e-11	1.97674e-08
ENSMUSG00000026317	Cln8	1.77039	6.01425	159.11	7.19849e-11	1.97674e-08
ENSMUSG00000027408	Cpxm1	3.08105	6.76993	162.904	7.16401e-11	1.97674e-08
ENSMUSG00000055541	Lair1	3.46629	5.16148	162.905	7.2401e-11	1.97674e-08
ENSMUSG00000024781	Lipa	2.60726	8.81598	158.034	7.64037e-11	1.97674e-08
ENSMUSG00000030329	Pianp	3.71177	5.31155	163.594	6.97941e-11	1.97674e-08
ENSMUSG00000048899	Rimkla	-3.52295	-0.500008	158.104	7.61092e-11	1.97674e-08
ENSMUSG00000029254	Stap1	3.91084	4.32799	162.194	7.52041e-11	1.97674e-08
ENSMUSG00000022788	Fgd4	2.2433	4.56593	157.152	8.22021e-11	2.04393e-08
ENSMUSG00000025743	Sdc3	1.79846	8.3364	156.925	8.12752e-11	2.04393e-08
ENSMUSG00000050390	C77080	1.84713	5.39213	155.716	8.6978e-11	2.1012e-08
ENSMUSG00000021466	Ptch1	-1.24404	5.0783	155.714	8.69906e-11	2.1012e-08
ENSMUSG00000037295	Ldlrap1	1.00685	6.05441	154.914	9.10069e-11	2.16725e-08
ENSMUSG00000062585	Cnr2	2.45811	3.18172	154.643	9.24121e-11	2.17014e-08
ENSMUSG00000038650	Rnh1	1.03244	7.26594	154.306	9.41954e-11	2.18172e-08
ENSMUSG00000037907	Ankrd13b	1.4755	4.06173	154.053	9.55576e-11	2.18336e-08
ENSMUSG00000049643	2310022A10Rik	1.62968	5.19669	153.258	9.99851e-11	2.25255e-08
ENSMUSG00000040345	Arhgap9	2.38061	5.53511	155.09	1.03915e-10	2.25255e-08
ENSMUSG00000039982	Dtx4	1.76201	6.64956	152.758	1.02889e-10	2.25255e-08
ENSMUSG00000004267	Eno2	2.34603	4.21818	153.172	1.02056e-10	2.25255e-08
ENSMUSG00000036086	Zranb3	5.02565	6.09908	158.411	1.06499e-10	2.27935e-08
ENSMUSG00000022408	Fam83f	2.78216	3.30501	149.74	1.22491e-10	2.55833e-08
ENSMUSG00000032827	Ppp1r9a	-1.1625	4.43528	149.52	1.24073e-10	2.55833e-08
ENSMUSG00000043091	Tuba1c	2.06512	5.72893	150.84	1.23648e-10	2.55833e-08
ENSMUSG00000030342	Cd9	2.1729	6.87332	149.902	1.30755e-10	2.60228e-08
ENSMUSG00000068335	Dok1	1.37654	4.88596	148.642	1.3061e-10	2.60228e-08
ENSMUSG00000026357	Rgs18	2.56376	3.63504	148.615	1.30822e-10	2.60228e-08
ENSMUSG00000034810	Scn7a	-1.39552	6.58801	147.636	1.38583e-10	2.72461e-08
ENSMUSG00000006585	Cdt1	2.21533	3.67629	146.616	1.47206e-10	2.86088e-08
ENSMUSG00000028917	Plekhm2	1.33638	6.52546	146	1.52705e-10	2.90105e-08
ENSMUSG00000017417	Plxdc1	3.21885	4.47724	149.323	1.51493e-10	2.90105e-08
ENSMUSG00000059811	Atl2	-1.14669	6.09687	145.72	1.5528e-10	2.9172e-08
ENSMUSG00000040713	Creg1	1.6033	7.38199	144.779	1.64279e-10	3.05234e-08
ENSMUSG00000032046	Abhd12	1.34943	7.96809	144.154	1.70577e-10	3.1349e-08
ENSMUSG00000040613	Apobec1	2.82202	7.17045	146.714	1.7631e-10	3.20543e-08
ENSMUSG00000033207	Mamdc2	2.44918	4.54517	144.965	1.82535e-10	3.28129e-08
ENSMUSG00000021384	Susd3	2.04581	3.24687	142.87	1.84364e-10	3.28129e-08
ENSMUSG00000025888	Casp1	1.82504	5.19643	141.839	1.96335e-10	3.31946e-08
ENSMUSG00000016256	Ctsz	1.5094	8.98815	141.504	2.00393e-10	3.31946e-08
ENSMUSG00000006519	Cyba	2.43246	7.21364	143.783	1.96751e-10	3.31946e-08
ENSMUSG00000016239	Lonrf3	3.65461	1.87505	142.012	1.94266e-10	3.31946e-08
ENSMUSG00000056515	Rab31	1.5804	6.58178	141.719	1.97776e-10	3.31946e-08
ENSMUSG00000031387	Renbp	2.29157	5.32768	144.055	1.96685e-10	3.31946e-08
ENSMUSG00000041654	Slc39a11	1.35286	5.16751	141.421	2.01422e-10	3.31946e-08
ENSMUSG00000074743	Thbd	-1.98866	7.25661	142.467	2.02215e-10	3.31946e-08
ENSMUSG00000026355	Mcm6	1.65778	5.31315	140.659	2.11083e-10	3.41934e-08
ENSMUSG00000058486	Wdr91	1.77071	5.74631	140.562	2.12343e-10	3.41934e-08
ENSMUSG00000042616	Oscp1	-1.89572	3.48417	140.323	2.15497e-10	3.43737e-08
ENSMUSG00000015112	Slc25a13	3.66266	3.62262	143.027	2.19379e-10	3.46659e-08
ENSMUSG00000037225	Fgf2	-1.61464	4.75843	139.839	2.22057e-10	3.47642e-08
ENSMUSG00000024030	Abcg1	1.83318	6.79875	139.36	2.28746e-10	3.54829e-08
ENSMUSG00000022365	Derl1	-0.826673	7.57593	139.134	2.31981e-10	3.56576e-08
ENSMUSG00000097715	Gpr137b-ps	2.24379	5.22587	140.956	2.34501e-10	3.57019e-08
ENSMUSG00000032220	Myo1e	3.27579	6.99902	141.747	2.40254e-10	3.57019e-08
ENSMUSG00000020312	Shc2	2.32363	4.49538	139.969	2.40715e-10	3.57019e-08
ENSMUSG00000022372	Sla	2.12475	4.53888	138.984	2.39944e-10	3.57019e-08
ENSMUSG00000004207	Psap	1.54871	12.3808	137.81	2.51993e-10	3.69879e-08
ENSMUSG00000034947	Tmem106a	1.49763	7.40382	137.699	2.53761e-10	3.69879e-08
ENSMUSG00000035891	Cerk	2.17048	6.61896	139.055	2.61163e-10	3.77414e-08
ENSMUSG00000034902	Pip5k1c	1.13626	7.08369	137.005	2.65083e-10	3.79832e-08
ENSMUSG00000053040	Aph1c	2.39438	4.28689	137.242	2.85172e-10	4.0255e-08
ENSMUSG00000045763	Basp1	3.06354	5.41949	138.503	2.92801e-10	4.0255e-08
ENSMUSG00000041827	Oasl1	2.89808	3.18052	135.53	2.92841e-10	4.0255e-08
ENSMUSG00000079049	Serpinb1c	6.61919	0.988988	175.901	2.8742e-10	4.0255e-08
ENSMUSG00000037490	Slc2a12	-2.60698	2.26156	135.663	2.88599e-10	4.0255e-08
ENSMUSG00000043157	Arl11	2.96704	4.21628	137.874	3.00267e-10	4.07285e-08
ENSMUSG00000025534	Gusb	1.82342	8.05721	134.998	3.01104e-10	4.07285e-08
ENSMUSG00000040212	Emp3	1.92145	6.67548	133.43	3.41583e-10	4.5121e-08
ENSMUSG00000027883	Gpsm2	1.48548	3.1991	133.222	3.37513e-10	4.5121e-08
ENSMUSG00000028581	Laptm5	2.39057	8.66813	133.278	3.40679e-10	4.5121e-08
ENSMUSG00000021262	Evl	2.74567	6.73474	135.289	3.54266e-10	4.64335e-08
ENSMUSG00000048779	P2ry6	2.57242	5.69818	134.901	3.61615e-10	4.70322e-08
ENSMUSG00000074361	C5ar2	2.73042	3.08117	131.975	3.65955e-10	4.72333e-08
ENSMUSG00000036622	Atp13a2	1.50804	7.13344	131.629	3.74317e-10	4.78196e-08
ENSMUSG00000005054	Cstb	1.66057	7.29606	131.548	3.76318e-10	4.78196e-08
ENSMUSG00000027423	Snx5	1.83012	7.84466	131.44	3.78982e-10	4.78196e-08
ENSMUSG00000078945	Naip2	2.26142	4.21514	131.127	4.02694e-10	4.85577e-08
ENSMUSG00000027698	Nceh1	3.5357	6.41851	133.874	3.91112e-10	4.85577e-08
ENSMUSG00000030223	Ptpro	2.21107	4.89961	132.111	4.04935e-10	4.85577e-08
ENSMUSG00000033059	Pygb	-2.05667	8.18605	131.232	3.9368e-10	4.85577e-08
ENSMUSG00000021451	Sema4d	3.60679	5.03453	133.418	4.02629e-10	4.85577e-08
ENSMUSG00000054520	Sh3bp2	2.52213	5.77612	133.663	3.91134e-10	4.85577e-08
ENSMUSG00000030579	Tyrobp	3.07733	7.57749	133.5	4.0054e-10	4.85577e-08
ENSMUSG00000031827	Cotl1	2.48699	7.98552	131.969	4.08669e-10	4.86604e-08
ENSMUSG00000031700	Gpt2	-1.76209	7.40345	130.008	4.16372e-10	4.92308e-08
ENSMUSG00000039976	Tbc1d16	-1.52361	5.09261	129.849	4.2077e-10	4.94054e-08
ENSMUSG00000041202	Pla2g2d	-2.3047	2.94134	128.557	4.58474e-10	5.34612e-08
ENSMUSG00000040479	Dgkz	1.17541	7.14099	128.195	4.69674e-10	5.43921e-08
ENSMUSG00000034708	Grn	1.56654	9.77075	128.007	4.75644e-10	5.47088e-08
ENSMUSG00000089809	A930011G23Rik	2.9724	3.86167	129.541	5.01403e-10	5.64164e-08
ENSMUSG00000031875	Cmtm3	1.55128	6.68429	127.167	5.03225e-10	5.64164e-08
ENSMUSG00000052776	Oas1a	2.31004	3.63868	126.954	5.1051e-10	5.64164e-08
ENSMUSG00000050737	Ptges	-1.74708	6.43935	127.897	5.10297e-10	5.64164e-08
ENSMUSG00000029925	Tbxas1	2.60199	5.90075	129.702	5.08692e-10	5.64164e-08
ENSMUSG00000031165	Was	2.07583	4.69747	128.388	4.9497e-10	5.64164e-08
ENSMUSG00000032492	Pth1r	-1.63109	4.91726	126.639	5.21458e-10	5.72521e-08
ENSMUSG00000047180	Neurl3	1.78669	5.46211	126.87	5.25748e-10	5.73506e-08
ENSMUSG00000017760	Ctsa	1.58707	8.59392	126.105	5.40662e-10	5.82262e-08
ENSMUSG00000039208	Metrnl	2.24665	6.20934	128.557	5.39285e-10	5.82262e-08
ENSMUSG00000019817	Plagl1	-2.5335	5.75386	128.723	5.45489e-10	5.83743e-08
ENSMUSG00000040964	Arhgef10l	1.74396	4.75808	125.417	5.6658e-10	6.02499e-08
ENSMUSG00000004530	Coro1c	1.13644	7.77909	124.608	5.98773e-10	6.32753e-08
ENSMUSG00000037902	Sirpa	2.44766	8.67988	125.161	6.11239e-10	6.41915e-08
ENSMUSG00000071324	Armc2	3.40788	1.87847	123.506	6.45921e-10	6.7415e-08
ENSMUSG00000001768	Rin2	0.965305	6.92662	122.815	6.77605e-10	7.0288e-08
ENSMUSG00000079559	Gm684	-1.7671	3.15386	122.583	6.88614e-10	7.09944e-08
ENSMUSG00000056758	Hmga2	7.19467	2.21199	124.66	7.0601e-10	7.23468e-08
ENSMUSG00000021003	Galc	1.5008	5.84478	122.087	7.12787e-10	7.26012e-08
ENSMUSG00000061132	Blnk	3.16488	5.9427	124.231	7.36191e-10	7.45361e-08
ENSMUSG00000022945	Chaf1b	2.09808	2.39356	121.225	7.57096e-10	7.54245e-08
ENSMUSG00000007041	Clic1	1.8892	7.2561	121.526	7.5428e-10	7.54245e-08
ENSMUSG00000000957	Mmp14	1.99371	7.07634	122.147	7.58349e-10	7.54245e-08
ENSMUSG00000054342	Kcnn4	2.98748	5.21339	123.63	7.6689e-10	7.5828e-08
ENSMUSG00000031907	Zfp90	1.27748	4.21953	120.605	7.909e-10	7.77473e-08
ENSMUSG00000027342	Pcna	1.40382	6.22877	120.435	8.00409e-10	7.82272e-08
ENSMUSG00000034216	Vps18	0.870892	5.42106	120.11	8.19031e-10	7.95872e-08
ENSMUSG00000071379	Hpcal1	1.37335	6.0064	119.937	8.29133e-10	8.01085e-08
ENSMUSG00000056888	Glipr1	4.15681	4.86071	122.678	8.53618e-10	8.15422e-08
ENSMUSG00000026669	Mcm10	1.95472	2.3559	119.093	8.80368e-10	8.36251e-08
ENSMUSG00000002111	Spi1	2.57721	6.30089	121.47	8.89348e-10	8.40061e-08
ENSMUSG00000004814	Ccl24	-1.30991	3.01779	118.846	8.95999e-10	8.41642e-08
ENSMUSG00000038543	BC028528	1.3285	3.90985	118.642	9.09148e-10	8.44384e-08
ENSMUSG00000034641	Cd300ld	2.80168	6.1771	121.077	9.139e-10	8.44384e-08
ENSMUSG00000039774	Galnt12	3.01772	3.15877	119.68	9.12151e-10	8.44384e-08
ENSMUSG00000030263	Lrmp	2.04978	5.14507	119.759	9.31105e-10	8.5176e-08
ENSMUSG00000092009	Myh15	7.27739	3.67507	121.668	9.36996e-10	8.5176e-08
ENSMUSG00000068747	Sort1	-1.248	8.50497	118.258	9.3453e-10	8.5176e-08
ENSMUSG00000031838	Ifi30	2.52741	7.11665	120.021	9.7136e-10	8.78276e-08
ENSMUSG00000037110	Ralgapa2	-1.23016	5.9036	117.343	9.98154e-10	8.97701e-08
ENSMUSG00000039206	Daglb	1.97451	6.99141	118.21	1.0156e-09	9.07376e-08
ENSMUSG00000053158	Fes	1.51815	6.25569	117.048	1.01964e-09	9.07376e-08
ENSMUSG00000074505	Fat3	5.66413	2.90282	119.3	1.03451e-09	9.0945e-08
ENSMUSG00000003546	Klc4	0.93444	5.10806	116.8	1.03811e-09	9.0945e-08
ENSMUSG00000041859	Mcm3	1.5012	4.84102	116.854	1.03406e-09	9.0945e-08
ENSMUSG00000026360	Rgs2	2.59873	5.59602	119.132	1.04679e-09	9.12324e-08
ENSMUSG00000015745	Plekho1	1.95062	6.44817	117.874	1.0641e-09	9.19758e-08
ENSMUSG00000021701	Plk2	1.48312	6.19747	116.432	1.0662e-09	9.19758e-08
ENSMUSG00000079685	Ulbp1	1.89973	3.53369	116.249	1.08055e-09	9.27409e-08
ENSMUSG00000079293	Clec7a	3.03976	6.12712	118.445	1.09869e-09	9.38213e-08
ENSMUSG00000022295	Atp6v1c1	0.852973	6.66521	115.872	1.11065e-09	9.43664e-08
ENSMUSG00000021998	Lcp1	3.10288	9.01123	118.04	1.11674e-09	9.44088e-08
ENSMUSG00000029994	Anxa4	1.03845	6.95983	115.545	1.1375e-09	9.56862e-08
ENSMUSG00000074570	Cass4	1.94251	3.05889	115.47	1.14371e-09	9.57322e-08
ENSMUSG00000004933	Matk	2.9706	4.78414	117.461	1.17813e-09	9.80238e-08
ENSMUSG00000028843	Sh3bgrl3	1.9532	7.87654	115.117	1.18269e-09	9.80238e-08
ENSMUSG00000023994	Nfya	1.25557	5.64455	113.826	1.29099e-09	1.06478e-07
ENSMUSG00000059089	Fcgr4	3.98519	3.81588	116.087	1.29985e-09	1.06688e-07
ENSMUSG00000021822	Plau	1.63737	7.66143	113.24	1.34844e-09	1.10142e-07
ENSMUSG00000034738	Nostrin	2.34824	3.0772	113.151	1.35742e-09	1.10342e-07
ENSMUSG00000025232	Hexa	1.52236	8.44071	112.512	1.42375e-09	1.15181e-07
ENSMUSG00000035713	Usp35	-1.25308	4.84047	112.3	1.44653e-09	1.16467e-07
ENSMUSG00000034652	Cd300a	3.12075	6.21009	114.496	1.45833e-09	1.1686e-07
ENSMUSG00000007833	Aldh16a1	0.934132	5.14873	111.959	1.48407e-09	1.17255e-07
ENSMUSG00000026387	Sctr	-2.671	2.62083	112.049	1.47409e-09	1.17255e-07
ENSMUSG00000036908	Unc93b1	1.70472	7.9681	111.981	1.48166e-09	1.17255e-07
ENSMUSG00000032589	Bsn	2.2096	2.02716	111.338	1.5552e-09	1.20621e-07
ENSMUSG00000024644	Cndp2	1.54521	7.79917	111.422	1.54529e-09	1.20621e-07
ENSMUSG00000019088	Dnase1l1	1.46072	5.90657	111.364	1.55212e-09	1.20621e-07
ENSMUSG00000027439	Gzf1	-0.964053	5.51781	111.351	1.55364e-09	1.20621e-07
ENSMUSG00000078771	Evi2a	2.48251	5.3693	113.178	1.60586e-09	1.23981e-07
ENSMUSG00000019132	BC005537	1.21164	8.39293	110.698	1.63238e-09	1.25456e-07
ENSMUSG00000035275	Raver2	-2.55307	4.26481	112.844	1.64586e-09	1.25919e-07
ENSMUSG00000001473	Tubb6	1.48492	6.40696	110.53	1.65335e-09	1.25922e-07
ENSMUSG00000030774	Pak1	2.5288	4.34686	112.209	1.70431e-09	1.29222e-07
ENSMUSG00000024646	Cyb5	-1.59849	8.49565	110.004	1.72092e-09	1.29276e-07
ENSMUSG00000037306	Man1c1	1.69463	6.60654	110.168	1.73561e-09	1.29276e-07
ENSMUSG00000062510	Nsl1	1.74849	1.97573	109.943	1.72897e-09	1.29276e-07
ENSMUSG00000030096	Slc6a6	2.12563	8.63211	110.155	1.71765e-09	1.29276e-07
ENSMUSG00000030720	Cln3	1.416	5.07215	109.676	1.7646e-09	1.29965e-07
ENSMUSG00000041842	Fhdc1	3.13226	2.21855	109.652	1.76792e-09	1.29965e-07
ENSMUSG00000070056	Mfhas1	1.45543	5.1909	109.672	1.76515e-09	1.29965e-07
ENSMUSG00000048897	Zfp710	1.35624	5.70421	109.285	1.81835e-09	1.33093e-07
ENSMUSG00000001525	Tubb5	1.16958	8.57747	108.893	1.87403e-09	1.36578e-07
ENSMUSG00000073490	AI607873	2.29414	6.35446	110.62	1.91875e-09	1.39237e-07
ENSMUSG00000024965	Fermt3	2.5432	6.34649	110.616	1.94218e-09	1.40335e-07
ENSMUSG00000040552	C3ar1	3.62134	7.54264	110.517	1.9566e-09	1.40775e-07
ENSMUSG00000091055	Siglec15	5.23627	0.482362	108.19	1.97852e-09	1.41749e-07
ENSMUSG00000031609	Sap30	1.96068	2.62627	108.126	1.98828e-09	1.41847e-07
ENSMUSG00000020458	Rtn4	0.959456	9.11623	108.043	2.00111e-09	1.42163e-07
ENSMUSG00000020778	Ten1	1.58178	3.30827	107.646	2.06374e-09	1.45999e-07
ENSMUSG00000020988	L2hgdh	-1.14097	3.40237	107.545	2.08012e-09	1.46545e-07
ENSMUSG00000079654	Prrt4	-3.31066	2.58038	108.319	2.12479e-09	1.49004e-07
ENSMUSG00000029175	Slc35f6	1.27424	5.90954	107.225	2.13265e-09	1.49004e-07
ENSMUSG00000025017	Pik3ap1	3.46473	5.64295	109.61	2.15588e-09	1.50007e-07
ENSMUSG00000031506	Ptpn7	2.2691	4.75333	108.831	2.19637e-09	1.52197e-07
ENSMUSG00000085793	Lin52	-1.33736	3.93009	106.755	2.21234e-09	1.52678e-07
ENSMUSG00000021474	Sfxn1	-1.51272	6.54303	106.7	2.24697e-09	1.54438e-07
ENSMUSG00000063193	Cd300lb	3.14859	6.3928	108.615	2.25906e-09	1.54641e-07
ENSMUSG00000048612	Myof	2.27748	7.0498	108.302	2.28685e-09	1.55912e-07
ENSMUSG00000018774	Cd68	3.51655	8.79619	108.146	2.3414e-09	1.58989e-07
ENSMUSG00000096960	A230028O05Rik	3.77837	1.66033	105.934	2.35984e-09	1.59601e-07
ENSMUSG00000026737	Pip4k2a	1.52246	6.01096	105.856	2.37442e-09	1.59947e-07
ENSMUSG00000030798	Cd37	2.1479	6.21071	107.461	2.43911e-09	1.63006e-07
ENSMUSG00000034910	Pygo1	-1.03619	2.77584	105.559	2.43077e-09	1.63006e-07
ENSMUSG00000040751	Lat2	3.20826	6.16542	107.526	2.45528e-09	1.63441e-07
ENSMUSG00000039062	Anpep	3.04041	7.955	106.778	2.60084e-09	1.72451e-07
ENSMUSG00000002603	Tgfb1	1.06824	6.52775	104.628	2.61714e-09	1.72854e-07
ENSMUSG00000027068	Dhrs9	4.1357	4.53419	106.946	2.68283e-09	1.76503e-07
ENSMUSG00000009905	Kdsr	-1.04437	5.53375	104.256	2.69602e-09	1.76683e-07
ENSMUSG00000021549	Rasa1	1.55953	6.49689	104.091	2.73183e-09	1.78339e-07
ENSMUSG00000089929	Bcl2a1b	3.8881	1.35805	104.003	2.75095e-09	1.78897e-07
ENSMUSG00000020818	Mfsd11	1.21543	5.67422	103.86	2.78267e-09	1.80266e-07
ENSMUSG00000049719	Prss46	5.64339	0.820577	103.667	2.82613e-09	1.82383e-07
ENSMUSG00000074577	Fam65c	1.88466	3.13988	103.496	2.86527e-09	1.84194e-07
ENSMUSG00000040528	Milr1	2.86432	3.4522	104.874	2.87599e-09	1.84194e-07
ENSMUSG00000048865	Arhgap30	2.28821	6.35734	105.223	2.90169e-09	1.85139e-07
ENSMUSG00000049985	Ankrd55	2.64183	0.402818	103.019	2.97747e-09	1.8926e-07
ENSMUSG00000032114	Slc37a4	-0.706612	4.53736	102.935	2.99781e-09	1.89839e-07
ENSMUSG00000025555	Farp1	-1.20085	5.04793	102.796	3.03174e-09	1.91271e-07
ENSMUSG00000071715	Ncf4	2.26151	4.63575	104.43	3.08814e-09	1.94105e-07
ENSMUSG00000034226	Rhov	5.28087	1.87909	103.282	3.13532e-09	1.9634e-07
ENSMUSG00000006273	Atp6v1b2	1.41112	8.46407	102.16	3.19222e-09	1.96414e-07
ENSMUSG00000036636	Clcn7	0.936416	6.74539	102.203	3.18094e-09	1.96414e-07
ENSMUSG00000038064	Cldn22	-3.74073	1.09755	102.269	3.16398e-09	1.96414e-07
ENSMUSG00000022488	Nckap1l	3.07934	7.65047	104.223	3.1749e-09	1.96414e-07
ENSMUSG00000010660	Plcd1	-1.62551	4.97658	102.878	3.19457e-09	1.96414e-07
ENSMUSG00000040659	Efhd2	2.16461	7.38845	103.636	3.21167e-09	1.9675e-07
ENSMUSG00000029560	Snx8	1.66053	6.03071	102.685	3.23022e-09	1.97171e-07
ENSMUSG00000019876	Pkib	3.63706	3.20933	103.799	3.24611e-09	1.97429e-07
ENSMUSG00000028927	Padi2	2.25721	3.25632	101.867	3.26913e-09	1.98116e-07
ENSMUSG00000017929	B4galt5	2.07553	5.94484	103.601	3.29754e-09	1.99124e-07
ENSMUSG00000026480	Ncf2	2.40659	6.09219	103.596	3.33651e-09	2.0076e-07
ENSMUSG00000038910	Plcl2	1.54044	4.71211	101.529	3.36051e-09	2.01488e-07
ENSMUSG00000049709	Nlrp10	2.02151	1.73229	101.369	3.40469e-09	2.03415e-07
ENSMUSG00000026786	Apbb1ip	1.656	6.08593	101.965	3.42363e-09	2.03826e-07
ENSMUSG00000054702	Ap1s3	2.61691	1.5355	101.199	3.45267e-09	2.04834e-07
ENSMUSG00000026177	Slc11a1	2.34138	6.64408	102.911	3.50574e-09	2.07255e-07
ENSMUSG00000026827	Gpd2	-1.55189	5.14384	101.217	3.60863e-09	2.12595e-07
ENSMUSG00000037994	Slc9b2	-2.44864	2.00548	100.431	3.67753e-09	2.15229e-07
ENSMUSG00000004626	Stxbp2	1.00657	6.15883	100.427	3.6788e-09	2.15229e-07
ENSMUSG00000013707	Tnfaip8l2	2.42073	4.78253	102.066	3.72746e-09	2.17324e-07
ENSMUSG00000026525	Opn3	-2.42496	4.15512	101.966	3.75748e-09	2.18321e-07
ENSMUSG00000038167	Plekhg6	-3.14719	2.71211	101.241	3.80103e-09	2.20095e-07
ENSMUSG00000024672	Ms4a7	3.69421	5.83461	103.255	3.82442e-09	2.20694e-07
ENSMUSG00000035686	Thrsp	-3.19341	9.00708	101.794	3.85288e-09	2.2158e-07
ENSMUSG00000048240	Gng7	-1.79826	3.21008	99.764	3.88614e-09	2.21983e-07
ENSMUSG00000029420	Rimbp2	-4.52791	0.0555567	99.7667	3.88527e-09	2.21983e-07
ENSMUSG00000006219	Fblim1	2.09315	5.94651	101.44	3.92021e-09	2.22426e-07
ENSMUSG00000024901	Peli3	-1.35154	2.62776	99.6593	3.92007e-09	2.22426e-07
ENSMUSG00000057219	Armc7	1.35992	3.54738	99.5031	3.97126e-09	2.23076e-07
ENSMUSG00000005142	Man2b1	1.15904	8.48083	99.5637	3.95132e-09	2.23076e-07
ENSMUSG00000024845	Tmem134	-1.37634	7.0834	99.5153	3.96722e-09	2.23076e-07
ENSMUSG00000072082	Ccnf	2.07478	2.87236	99.3019	4.03828e-09	2.2609e-07
ENSMUSG00000083307	AA414768	2.16858	1.44195	99.1557	4.08779e-09	2.26883e-07
ENSMUSG00000034786	Gpsm3	1.72305	4.3473	99.1576	4.08712e-09	2.26883e-07
ENSMUSG00000021069	Pygl	-1.97351	7.92038	100.247	4.09269e-09	2.26883e-07
ENSMUSG00000029468	P2rx7	1.80342	5.41751	100.023	4.16833e-09	2.3032e-07
ENSMUSG00000021624	Cd180	3.39919	5.79661	101.263	4.19552e-09	2.31068e-07
ENSMUSG00000026600	Soat1	2.80222	6.43414	100.507	4.2756e-09	2.33954e-07
ENSMUSG00000036817	Sun1	-0.799156	5.97369	98.6347	4.26967e-09	2.33954e-07
ENSMUSG00000048677	Tpcn2	2.24455	6.3122	100.297	4.31537e-09	2.35369e-07
ENSMUSG00000009569	Mkl2	0.926312	5.31652	98.4455	4.33793e-09	2.35838e-07
ENSMUSG00000050708	Ftl1	1.34009	11.0423	98.3787	4.3623e-09	2.36403e-07
ENSMUSG00000030760	Acer3	1.97195	4.89916	99.2685	4.50726e-09	2.39535e-07
ENSMUSG00000026023	Cdk15	3.92118	1.75194	98.052	4.48374e-09	2.39535e-07
ENSMUSG00000020886	Dlg4	0.947363	3.95165	97.9766	4.51227e-09	2.39535e-07
ENSMUSG00000044042	Fmn1	2.58206	3.79648	99.5132	4.51927e-09	2.39535e-07
ENSMUSG00000049791	Fzd4	-1.42435	8.82891	98.0243	4.4942e-09	2.39535e-07
ENSMUSG00000028931	Kcnab2	1.95004	5.12017	99.5463	4.46336e-09	2.39535e-07
ENSMUSG00000018965	Ywhah	0.862624	7.11155	98.0127	4.49859e-09	2.39535e-07
ENSMUSG00000028459	Cd72	4.59433	5.14691	101.093	4.54154e-09	2.39964e-07
ENSMUSG00000051498	Tlr6	2.31581	3.11525	97.8599	4.55686e-09	2.40023e-07
ENSMUSG00000034807	Colgalt1	0.842563	7.66141	97.6837	4.62511e-09	2.42861e-07
ENSMUSG00000049526	Tmem202	1.59761	2.04838	97.4602	4.7133e-09	2.46726e-07
ENSMUSG00000037112	Sik2	-1.4878	6.97427	97.4984	4.73002e-09	2.46837e-07
ENSMUSG00000025764	Phf17	-0.75315	5.92596	97.2645	4.79207e-09	2.49305e-07
ENSMUSG00000059173	Pde1a	-1.65236	4.60466	97.7983	4.82823e-09	2.50416e-07
ENSMUSG00000022841	Ap2m1	0.905864	7.43119	96.9079	4.93928e-09	2.55393e-07
ENSMUSG00000066510	Ankdd1a	3.68485	2.29792	96.8484	5.08343e-09	2.60456e-07
ENSMUSG00000020476	Dbnl	0.705868	6.41992	96.5772	5.08029e-09	2.60456e-07
ENSMUSG00000060572	Mfap2	2.03031	3.75553	96.8005	5.05946e-09	2.60456e-07
ENSMUSG00000021457	Syk	2.33852	7.05117	98.1698	5.12446e-09	2.61765e-07
ENSMUSG00000027293	Ehd4	1.70047	7.66737	96.1804	5.25539e-09	2.67645e-07
ENSMUSG00000057948	Unc13d	1.7929	2.85289	95.9879	5.34271e-09	2.71275e-07
ENSMUSG00000036438	Calm2	0.924421	8.07392	95.7461	5.45469e-09	2.75307e-07
ENSMUSG00000022197	Pdzd2	-1.51544	6.98956	95.9896	5.44504e-09	2.75307e-07
ENSMUSG00000022707	Gbe1	-1.40958	6.05885	95.7884	5.49167e-09	2.76349e-07
ENSMUSG00000036905	C1qb	2.52087	9.15209	96.5968	5.54605e-09	2.77434e-07
ENSMUSG00000031885	Cbfb	1.06104	5.46373	95.5659	5.5398e-09	2.77434e-07
ENSMUSG00000038843	Gcnt1	2.32086	4.19747	97.0077	5.62147e-09	2.80377e-07
ENSMUSG00000025815	Dhtkd1	-2.22405	3.81987	96.7705	5.64571e-09	2.80758e-07
ENSMUSG00000024413	Npc1	1.36336	6.31693	95.174	5.73003e-09	2.84115e-07
ENSMUSG00000033386	Frrs1	1.36154	5.25451	95.0528	5.79029e-09	2.86264e-07
ENSMUSG00000046410	Kcnk6	1.64527	4.47509	94.9761	5.82882e-09	2.87329e-07
ENSMUSG00000042476	Abcb4	2.52739	2.9463	94.9333	5.85043e-09	2.87556e-07
ENSMUSG00000024617	Camk2a	2.21744	2.87189	94.7503	5.94384e-09	2.913e-07
ENSMUSG00000008475	Arpc5	1.01717	7.56536	94.5422	6.05202e-09	2.92364e-07
ENSMUSG00000038508	Gdf15	2.88158	1.95718	94.5942	6.02478e-09	2.92364e-07
ENSMUSG00000021190	Lgmn	2.7006	8.90813	96.3086	5.98857e-09	2.92364e-07
ENSMUSG00000045903	Npas4	2.86529	3.27029	95.8316	6.01108e-09	2.92364e-07
ENSMUSG00000004266	Ptpn6	2.37522	5.88841	96.3159	6.04977e-09	2.92364e-07
ENSMUSG00000037946	Fgd3	2.51105	4.50086	96.1056	6.12913e-09	2.93573e-07
ENSMUSG00000023990	Tfeb	1.01423	4.91627	94.4262	6.11326e-09	2.93573e-07
ENSMUSG00000079659	Tmem243	-1.32797	4.71222	94.3988	6.12788e-09	2.93573e-07
ENSMUSG00000046675	Tmem251	0.912219	3.66949	94.3285	6.1654e-09	2.93909e-07
ENSMUSG00000059866	Tnip2	0.920317	5.0937	94.3183	6.1709e-09	2.93909e-07
ENSMUSG00000030707	Coro1a	1.84633	6.73305	95.3029	6.23419e-09	2.96089e-07
ENSMUSG00000030844	Rgs10	1.90868	5.32646	95.6614	6.28856e-09	2.97835e-07
ENSMUSG00000049988	Lrrc25	2.65816	4.95495	95.811	6.3135e-09	2.98181e-07
ENSMUSG00000022987	Zfp641	-1.7738	2.87948	94.0152	6.33588e-09	2.98404e-07
ENSMUSG00000031355	Arhgap6	1.7573	3.86716	93.8862	6.40759e-09	3.00109e-07
ENSMUSG00000038387	Rras	-1.30625	7.20132	93.9139	6.39214e-09	3.00109e-07
ENSMUSG00000031608	Galnt7	2.16772	4.15418	94.9193	6.4467e-09	3.00373e-07
ENSMUSG00000056529	Ptafr	1.89312	6.42681	95.2455	6.44874e-09	3.00373e-07
ENSMUSG00000026548	Slamf9	1.95631	4.64572	94.8686	6.47045e-09	3.00556e-07
ENSMUSG00000006304	Arpc2	0.95598	8.24027	93.6473	6.54275e-09	3.02785e-07
ENSMUSG00000003526	Prodh	-2.46719	4.66427	95.37	6.55426e-09	3.02785e-07
ENSMUSG00000027379	Bub1	2.90461	2.06637	93.4633	6.64903e-09	3.04666e-07
ENSMUSG00000059326	Csf2ra	1.91603	7.15133	94.5638	6.64215e-09	3.04666e-07
ENSMUSG00000048163	Selplg	1.99565	5.91035	95.0394	6.66978e-09	3.04791e-07
ENSMUSG00000039236	Isg20	-1.19129	3.57171	93.3916	6.69092e-09	3.04933e-07
ENSMUSG00000024516	Sec11c	1.11055	5.66477	93.2122	6.79706e-09	3.08937e-07
ENSMUSG00000034361	Cpne2	-1.26244	6.15998	93.141	6.83972e-09	3.09332e-07
ENSMUSG00000026126	Ptpn18	1.85067	4.46023	93.8703	6.84234e-09	3.09332e-07
ENSMUSG00000060131	Atp8b4	3.12197	4.24051	94.6546	6.96663e-09	3.14112e-07
ENSMUSG00000005410	Mcm5	1.66562	4.63029	93.1139	6.98552e-09	3.14125e-07
ENSMUSG00000047534	Mis18bp1	2.17802	1.96683	92.6309	7.15404e-09	3.2085e-07
ENSMUSG00000056602	Fry	-1.56175	6.96884	93.1468	7.20554e-09	3.22305e-07
ENSMUSG00000001420	Tmem79	-2.18333	2.71404	92.5009	7.23664e-09	3.22842e-07
ENSMUSG00000037316	Bag4	-1.10431	5.08535	92.3674	7.32256e-09	3.2547e-07
ENSMUSG00000025877	Hk3	3.45987	6.10981	95.032	7.3533e-09	3.2547e-07
ENSMUSG00000079523	Tmsb10	1.49824	7.27624	92.3353	7.3434e-09	3.2547e-07
ENSMUSG00000036526	Card11	3.58399	4.44621	94.152	7.37817e-09	3.25718e-07
ENSMUSG00000044349	Snhg11	-1.98976	6.37532	93.8676	7.41917e-09	3.26676e-07
ENSMUSG00000022803	Popdc2	-3.18574	2.95113	93.7033	7.48053e-09	3.28521e-07
ENSMUSG00000021939	Ctsb	1.48026	12.318	92.0379	7.53955e-09	3.30256e-07
ENSMUSG00000004730	Emr1	3.38311	7.98699	93.5048	7.69077e-09	3.32572e-07
ENSMUSG00000021108	Prkch	1.07687	5.51159	91.85	7.66638e-09	3.32572e-07
ENSMUSG00000038623	Tm6sf1	1.5666	5.93103	92.4925	7.61793e-09	3.32572e-07
ENSMUSG00000027956	Tmem144	2.55529	2.24175	91.8277	7.68163e-09	3.32572e-07
ENSMUSG00000074472	Zfp872	-2.57568	0.696245	91.8382	7.67445e-09	3.32572e-07
ENSMUSG00000033161	Atp1a1	1.25375	7.87276	91.7009	7.76875e-09	3.34736e-07
ENSMUSG00000035004	Igsf6	2.77403	5.45406	93.3708	7.78042e-09	3.34736e-07
ENSMUSG00000054200	Ffar4	-2.08525	4.29674	93.1511	7.84687e-09	3.36738e-07
ENSMUSG00000026228	Htr2b	5.99557	2.89852	93.1583	7.92499e-09	3.3923e-07
ENSMUSG00000006731	B4galnt1	2.30418	5.2631	93.0677	7.98754e-09	3.41044e-07
ENSMUSG00000028980	H6pd	-1.33696	8.95221	91.2389	8.09565e-09	3.44789e-07
ENSMUSG00000024742	Fen1	1.58834	3.9795	91.2092	8.11715e-09	3.44836e-07
ENSMUSG00000039461	Tcta	-0.885588	5.68053	91.1152	8.18568e-09	3.46876e-07
ENSMUSG00000074622	Mafb	2.57496	7.27436	92.4535	8.42612e-09	3.56172e-07
ENSMUSG00000028599	Tnfrsf1b	1.84446	6.80179	91.7706	8.5438e-09	3.60246e-07
ENSMUSG00000020143	Dock2	2.60758	6.57022	92.1806	8.62942e-09	3.6205e-07
ENSMUSG00000032584	Mst1r	-1.5589	5.2637	91.5121	8.60995e-09	3.6205e-07
ENSMUSG00000059923	Grb2	0.843793	7.00118	90.4581	8.68304e-09	3.62501e-07
ENSMUSG00000052889	Prkcb	2.22543	3.97618	91.5801	8.66784e-09	3.62501e-07
ENSMUSG00000033777	Tlr13	4.11638	5.68555	93.2346	8.71758e-09	3.63046e-07
ENSMUSG00000026628	Atf3	3.73936	6.62154	93.0689	8.8426e-09	3.65552e-07
ENSMUSG00000031490	Eif4ebp1	-1.6918	7.62373	90.9917	8.83464e-09	3.65552e-07
ENSMUSG00000033256	Shf	-1.02012	2.79422	90.2593	8.84003e-09	3.65552e-07
ENSMUSG00000068699	Flnc	1.61841	5.10604	90.783	8.90118e-09	3.66262e-07
ENSMUSG00000033066	Gas7	1.98748	7.51686	91.2774	8.9031e-09	3.66262e-07
ENSMUSG00000032312	Csk	0.81988	6.85189	90.1372	8.93794e-09	3.66803e-07
ENSMUSG00000032344	Mb21d1	1.73129	2.26072	89.8862	9.14309e-09	3.73409e-07
ENSMUSG00000029416	Slc15a4	0.906928	4.74396	89.905	9.12756e-09	3.73409e-07
ENSMUSG00000024660	Incenp	1.77762	4.80054	90.7454	9.17403e-09	3.7377e-07
ENSMUSG00000037995	Igsf9	1.56984	3.25774	89.7834	9.22862e-09	3.74191e-07
ENSMUSG00000024270	Slc39a6	1.14683	4.65518	89.7948	9.21907e-09	3.74191e-07
ENSMUSG00000006589	Aprt	1.9016	5.47014	91.2641	9.25636e-09	3.74418e-07
ENSMUSG00000030095	Tmem43	-1.26109	8.25199	89.6918	9.30558e-09	3.7551e-07
ENSMUSG00000041075	Fzd7	1.0809	4.95603	89.6028	9.38097e-09	3.77651e-07
ENSMUSG00000031489	Adrb3	-4.07034	8.49975	92.0529	9.65403e-09	3.85887e-07
ENSMUSG00000040907	Atp1a3	2.01948	6.66761	90.8013	9.64333e-09	3.85887e-07
ENSMUSG00000039917	Rhbdd2	-0.729312	5.10851	89.331	9.61555e-09	3.85887e-07
ENSMUSG00000086291	Gm15513	1.99829	2.00471	89.0749	9.84246e-09	3.90649e-07
ENSMUSG00000029291	Rufy3	1.01495	5.13554	89.0795	9.83839e-09	3.90649e-07
ENSMUSG00000026670	Uap1	-0.854022	6.35203	89.0771	9.84053e-09	3.90649e-07
ENSMUSG00000027506	Tpd52	2.31057	6.45674	90.6105	9.90979e-09	3.924e-07
ENSMUSG00000004633	Chn2	1.58375	3.32524	88.9737	9.93377e-09	3.9243e-07
ENSMUSG00000025246	Tbl1x	-0.626308	7.13587	88.9101	9.99165e-09	3.93797e-07
ENSMUSG00000014602	Kif1a	3.7358	2.44105	89.6588	1.01588e-08	3.99455e-07
ENSMUSG00000073460	Pnldc1	-2.23629	3.37796	89.4291	1.02327e-08	4.01424e-07
ENSMUSG00000083161	Gm11427	2.00304	2.54737	88.5927	1.02859e-08	4.01651e-07
ENSMUSG00000037731	Themis2	1.60632	5.62948	89.3925	1.02623e-08	4.01651e-07
ENSMUSG00000011148	Adssl1	3.0391	4.9907	90.0878	1.03815e-08	4.01914e-07
ENSMUSG00000015027	Galns	1.00921	5.53831	88.5528	1.03237e-08	4.01914e-07
ENSMUSG00000033581	Igf2bp2	2.17077	4.76162	90.0143	1.03429e-08	4.01914e-07
ENSMUSG00000032251	Irak1bp1	-1.52635	3.09979	88.4852	1.03878e-08	4.01914e-07
ENSMUSG00000038344	Txlng	-1.04969	4.97041	88.3918	1.04772e-08	4.04448e-07
ENSMUSG00000085151	1110018N20Rik	-1.7569	2.1533	88.3562	1.05115e-08	4.04849e-07
ENSMUSG00000034792	Gna15	1.77185	2.63778	88.3011	1.05649e-08	4.05873e-07
ENSMUSG00000031903	Pla2g15	1.51278	7.00904	88.3222	1.05861e-08	4.05873e-07
ENSMUSG00000030671	Pde3b	-1.53513	7.40563	88.398	1.06692e-08	4.08135e-07
ENSMUSG00000049969	Plekhf2	0.637508	5.1206	88.1032	1.07589e-08	4.10634e-07
ENSMUSG00000056737	Capg	2.86197	7.99657	89.6125	1.0832e-08	4.12496e-07
ENSMUSG00000046841	Ckap4	1.38244	5.86703	87.9244	1.09375e-08	4.1477e-07
ENSMUSG00000026657	Frmd4a	1.15428	5.32516	87.9211	1.09408e-08	4.1477e-07
ENSMUSG00000042404	Dennd4b	1.5891	5.77904	88.5709	1.10426e-08	4.17691e-07
ENSMUSG00000023982	Guca1a	2.20511	1.5937	87.6932	1.11734e-08	4.20756e-07
ENSMUSG00000030978	Rrm1	1.17697	5.103	87.713	1.11529e-08	4.20756e-07
ENSMUSG00000041870	Ankrd13a	0.590119	6.73891	87.6246	1.12443e-08	4.22487e-07
ENSMUSG00000030220	Arhgdib	1.43754	6.85572	87.5004	1.13743e-08	4.25297e-07
ENSMUSG00000005470	Asf1b	2.16949	2.88584	87.4812	1.13946e-08	4.25297e-07
ENSMUSG00000056394	Lig1	1.61987	4.39333	87.5232	1.13503e-08	4.25297e-07
ENSMUSG00000074802	Gas2l3	3.08441	3.91818	88.9823	1.14629e-08	4.26905e-07
ENSMUSG00000035944	Ttc38	-1.1833	5.02035	87.2239	1.16695e-08	4.33644e-07
ENSMUSG00000028463	Car9	3.42481	1.32272	87.148	1.1752e-08	4.35753e-07
ENSMUSG00000038644	Pold1	0.889464	4.2114	87.0894	1.18161e-08	4.37088e-07
ENSMUSG00000025574	Tk1	2.96166	3.98963	88.624	1.18397e-08	4.37088e-07
ENSMUSG00000031605	Klhl2	-1.50795	6.17756	87.8484	1.19193e-08	4.39066e-07
ENSMUSG00000049670	Morn4	-2.27003	0.947373	86.9678	1.19505e-08	4.39258e-07
ENSMUSG00000048424	Ranbp3l	-3.01931	0.888987	86.8591	1.2072e-08	4.42761e-07
ENSMUSG00000062646	Ganc	-0.862919	5.0788	86.8165	1.212e-08	4.43562e-07
ENSMUSG00000028873	Cdca8	1.96483	3.31505	86.6234	1.23401e-08	4.50642e-07
ENSMUSG00000040006	Ginm1	-1.30746	7.54345	86.5544	1.24199e-08	4.51604e-07
ENSMUSG00000044350	Lacc1	1.61933	5.54666	87.4006	1.24196e-08	4.51604e-07
ENSMUSG00000011382	Dhdh	-1.37175	7.02821	86.4784	1.25084e-08	4.53845e-07
ENSMUSG00000051735	Rinl	1.438	3.91857	86.3328	1.26799e-08	4.59084e-07
ENSMUSG00000000439	Mkrn2	-0.74248	5.00216	86.2774	1.27458e-08	4.60484e-07
ENSMUSG00000086679	Gm15551	-1.96102	3.77327	86.8996	1.29392e-08	4.64494e-07
ENSMUSG00000020901	Pik3r5	2.70086	5.7938	87.6763	1.29037e-08	4.64494e-07
ENSMUSG00000034116	Vav1	2.74187	5.13725	87.647	1.29383e-08	4.64494e-07
ENSMUSG00000073489	Ifi204	1.36543	5.19003	86.0081	1.30717e-08	4.66281e-07
ENSMUSG00000049871	Nlrc3	2.79487	2.35907	86.0262	1.30496e-08	4.66281e-07
ENSMUSG00000039981	Zc3h12d	2.11315	3.22774	86.0317	1.30428e-08	4.66281e-07
ENSMUSG00000030536	Iqgap1	1.50212	8.21819	85.9196	1.31809e-08	4.69184e-07
ENSMUSG00000036611	Eepd1	-2.29198	7.89759	87.3207	1.33298e-08	4.72496e-07
ENSMUSG00000003283	Hck	3.18525	4.64303	87.3256	1.33238e-08	4.72496e-07
ENSMUSG00000063015	Ccni	-0.657992	7.55752	85.7367	1.34095e-08	4.73334e-07
ENSMUSG00000048497	Mmgt2	1.73411	2.74337	85.7446	1.33995e-08	4.73334e-07
ENSMUSG00000031659	Adcy7	2.48107	6.79131	87.1718	1.35128e-08	4.7548e-07
ENSMUSG00000059498	Fcgr3	2.48283	7.22166	87.1608	1.35265e-08	4.7548e-07
ENSMUSG00000038886	Man2a2	-0.972722	7.77042	85.56	1.36345e-08	4.78283e-07
ENSMUSG00000066595	Mfsd7b	1.42527	4.39991	85.4647	1.37577e-08	4.81606e-07
ENSMUSG00000057134	Ado	0.734552	5.00166	85.3688	1.38828e-08	4.84982e-07
ENSMUSG00000041695	Kcnj2	2.04629	4.36894	86.509	1.3927e-08	4.85523e-07
ENSMUSG00000038936	Sccpdh	-1.24454	4.86119	85.0977	1.42434e-08	4.93498e-07
ENSMUSG00000047407	Tgif1	1.73334	4.50556	85.6646	1.42184e-08	4.93498e-07
ENSMUSG00000032020	Ubash3b	2.17612	4.38983	86.5304	1.41911e-08	4.93498e-07
ENSMUSG00000060586	H2-Eb1	1.28502	9.21902	85.062	1.42916e-08	4.94157e-07
ENSMUSG00000040133	Gpr176	3.11924	2.61192	85.6215	1.43956e-08	4.96735e-07
ENSMUSG00000079426	Arpc4	0.616816	6.69293	84.9314	1.44696e-08	4.98274e-07
ENSMUSG00000026806	Ddx31	1.17523	3.14229	84.8954	1.45191e-08	4.98961e-07
ENSMUSG00000028494	Plin2	1.78491	10.3484	84.8644	1.4562e-08	4.99419e-07
ENSMUSG00000057672	Pkn1	0.736989	7.49688	84.8199	1.46235e-08	5.00515e-07
ENSMUSG00000006958	Chrd	-1.07615	3.88003	84.7578	1.47101e-08	5.0145e-07
ENSMUSG00000022223	Sdr39u1	-1.37728	4.27107	84.7599	1.47072e-08	5.0145e-07
ENSMUSG00000006641	Slc5a6	-1.95403	5.35115	86.2092	1.47651e-08	5.02312e-07
ENSMUSG00000031007	Atp6ap2	0.764589	6.55353	84.6149	1.49113e-08	5.04364e-07
ENSMUSG00000004952	Rasa4	1.30411	6.18826	84.6123	1.4915e-08	5.04364e-07
ENSMUSG00000046688	Tifa	1.69023	4.13941	84.6913	1.48942e-08	5.04364e-07
ENSMUSG00000085184	4933439K11Rik	2.86779	0.230866	84.5046	1.50687e-08	5.07296e-07
ENSMUSG00000061313	Ddhd2	-0.649472	5.99622	84.4886	1.50917e-08	5.07296e-07
ENSMUSG00000020375	Rufy1	0.890699	5.23911	84.5005	1.50746e-08	5.07296e-07
ENSMUSG00000039316	Rftn1	1.31059	5.48626	84.4648	1.51259e-08	5.07438e-07
ENSMUSG00000035279	Ssc5d	1.76792	5.62409	85.6382	1.52119e-08	5.09313e-07
ENSMUSG00000029622	Arpc1b	1.10028	8.67773	84.3748	1.52562e-08	5.09594e-07
ENSMUSG00000005045	Chd5	2.76705	1.79904	84.2963	1.5371e-08	5.09594e-07
ENSMUSG00000075394	Hoxc4	-1.39191	4.08283	84.3077	1.53542e-08	5.09594e-07
ENSMUSG00000058818	Pirb	2.63581	6.98981	85.7991	1.53371e-08	5.09594e-07
ENSMUSG00000026979	Psd4	1.83048	4.81845	85.3468	1.53147e-08	5.09594e-07
ENSMUSG00000067787	Blcap	-1.26893	6.93811	84.1396	1.56027e-08	5.15254e-07
ENSMUSG00000025934	Gsta3	-2.96392	6.08693	86.6738	1.55819e-08	5.15254e-07
ENSMUSG00000038900	Rpl12	0.917139	8.0793	84.094	1.56709e-08	5.16498e-07
ENSMUSG00000024737	Slc15a3	3.75112	6.22499	86.5824	1.57125e-08	5.16863e-07
ENSMUSG00000043140	Tmem186	-0.762251	4.47984	84.0247	1.57752e-08	5.17915e-07
ENSMUSG00000024816	Frmd8	0.832581	5.71348	83.9898	1.5828e-08	5.18643e-07
ENSMUSG00000055027	Smyd1	-3.09944	2.3325	84.798	1.5896e-08	5.19863e-07
ENSMUSG00000037280	Galnt6	3.67477	4.68744	86.2072	1.60046e-08	5.22405e-07
ENSMUSG00000054428	Atpif1	1.17865	5.86746	83.7823	1.61458e-08	5.25998e-07
ENSMUSG00000026207	Speg	1.37711	4.95226	83.7535	1.61905e-08	5.2644e-07
ENSMUSG00000033220	Rac2	1.94733	5.8745	84.7736	1.67122e-08	5.4236e-07
ENSMUSG00000003882	Il7r	4.05079	5.55884	85.8061	1.68717e-08	5.46487e-07
ENSMUSG00000097574	C920006O11Rik	-1.66315	2.28766	83.03	1.73586e-08	5.61184e-07
ENSMUSG00000062082	Cd200r4	2.90591	2.75828	83.6497	1.74098e-08	5.61764e-07
ENSMUSG00000026341	Actr3	1.21298	8.20241	82.4234	1.84098e-08	5.92769e-07
ENSMUSG00000036943	Rab8b	2.07558	6.64057	83.7882	1.84408e-08	5.92769e-07
ENSMUSG00000046432	Ngfrap1	1.53538	3.52543	82.2077	1.88003e-08	6.03179e-07
ENSMUSG00000003573	Homer3	0.673744	4.82242	82.0687	1.90568e-08	6.09098e-07
ENSMUSG00000068874	Selenbp1	-1.56465	6.75021	82.8946	1.9052e-08	6.09098e-07
ENSMUSG00000003721	Insig2	-1.00901	6.19865	82.0272	1.91342e-08	6.10416e-07
ENSMUSG00000020808	Fam64a	2.0705	2.53202	81.9427	1.92926e-08	6.12853e-07
ENSMUSG00000006715	Gmnn	1.50255	3.14631	81.9605	1.92591e-08	6.12853e-07
ENSMUSG00000020668	Kif3c	1.0404	3.62234	81.9286	1.93193e-08	6.12853e-07
ENSMUSG00000026928	Card9	1.97523	3.70154	82.255	1.96033e-08	6.14888e-07
ENSMUSG00000052928	Ctif	-1.37776	5.89465	82.2512	1.9618e-08	6.14888e-07
ENSMUSG00000073609	D2hgdh	-0.91063	4.67744	81.8007	1.95623e-08	6.14888e-07
ENSMUSG00000043004	Gng2	1.35427	5.56079	81.8174	1.95305e-08	6.14888e-07
ENSMUSG00000021948	Prkcd	1.66549	6.94945	82.582	1.9595e-08	6.14888e-07
ENSMUSG00000026238	Ptma	0.828652	8.13799	81.7679	1.96252e-08	6.14888e-07
ENSMUSG00000026384	Ptpn4	-1.32297	4.44232	81.7612	1.9638e-08	6.14888e-07
ENSMUSG00000056899	Immp2l	-1.69881	3.30746	81.6037	1.99433e-08	6.22638e-07
ENSMUSG00000000958	Slc7a7	1.64802	4.10237	81.5956	1.99592e-08	6.22638e-07
ENSMUSG00000069910	Spdl1	2.39339	2.22604	81.5194	2.01088e-08	6.2615e-07
ENSMUSG00000027843	Ptpn22	2.01263	3.70377	82.0032	2.01649e-08	6.26744e-07
ENSMUSG00000030047	Arhgap25	3.14682	6.52413	83.3301	2.02597e-08	6.28533e-07
ENSMUSG00000019942	Cdk1	2.38879	3.68156	82.5104	2.04522e-08	6.31093e-07
ENSMUSG00000027221	Chst1	-2.1856	7.14767	82.7729	2.03985e-08	6.31093e-07
ENSMUSG00000033685	Ucp2	2.07384	9.77746	81.3544	2.04542e-08	6.31093e-07
ENSMUSG00000026458	Ppfia4	1.62953	3.57289	81.1832	2.07842e-08	6.40108e-07
ENSMUSG00000044788	Fads6	2.19181	2.86088	81.1008	2.09535e-08	6.44148e-07
ENSMUSG00000098055	Gm26947	3.07958	1.77368	81.0502	2.10584e-08	6.46198e-07
ENSMUSG00000030148	Clec4a2	2.31796	5.18845	82.3973	2.11461e-08	6.47715e-07
ENSMUSG00000023992	Trem2	4.35369	7.62384	83.1338	2.16459e-08	6.6168e-07
ENSMUSG00000029364	Wsb2	0.646	6.82675	80.7553	2.16803e-08	6.6168e-07
ENSMUSG00000054051	Ercc6	1.11805	4.18414	80.7179	2.17607e-08	6.61744e-07
ENSMUSG00000036594	H2-Aa	1.31017	9.70648	80.7351	2.17236e-08	6.61744e-07
ENSMUSG00000015340	Cybb	2.37397	7.19771	82.0727	2.18166e-08	6.62254e-07
ENSMUSG00000036879	Phkb	-0.838876	5.7021	80.6229	2.19661e-08	6.65596e-07
ENSMUSG00000030793	Pycard	2.07229	4.5306	81.8369	2.21056e-08	6.68626e-07
ENSMUSG00000060216	Arrb2	1.49542	6.26775	81.0226	2.22308e-08	6.71212e-07
ENSMUSG00000028337	Coro2a	1.23705	4.577	80.4403	2.2367e-08	6.72776e-07
ENSMUSG00000005514	Por	-1.17955	8.40085	80.4499	2.23459e-08	6.72776e-07
ENSMUSG00000075028	Prdm11	1.48287	2.72572	80.4246	2.2402e-08	6.72776e-07
ENSMUSG00000049130	C5ar1	2.9001	6.5291	81.9547	2.25387e-08	6.75682e-07
ENSMUSG00000030313	Dennd5b	-0.866039	3.81125	80.311	2.26559e-08	6.76326e-07
ENSMUSG00000058715	Fcer1g	2.32809	6.99352	81.6705	2.26802e-08	6.76326e-07
ENSMUSG00000019809	Pex3	-1.0503	5.54361	80.3329	2.26066e-08	6.76326e-07
ENSMUSG00000000555	Itga5	1.06909	6.82147	80.1935	2.2922e-08	6.82335e-07
ENSMUSG00000036246	Gmip	1.79292	5.67357	81.3614	2.31474e-08	6.87831e-07
ENSMUSG00000036606	Plxnb2	2.0309	7.55934	81.3087	2.32662e-08	6.90148e-07
ENSMUSG00000002728	Naa20	0.720985	5.13766	79.8766	2.36568e-08	7.00508e-07
ENSMUSG00000059401	Mamld1	1.19405	3.91267	79.8371	2.37502e-08	7.00816e-07
ENSMUSG00000020156	Mum1	-0.900954	6.43929	79.8411	2.37406e-08	7.00816e-07
ENSMUSG00000039166	Akap7	-1.02226	5.26769	79.7697	2.39106e-08	7.03096e-07
ENSMUSG00000004631	Sgce	-1.17352	6.07006	79.7836	2.38773e-08	7.03096e-07
ENSMUSG00000025351	Cd63	1.18601	8.41968	79.7082	2.40579e-08	7.062e-07
ENSMUSG00000024621	Csf1r	1.66993	8.65877	79.6626	2.41678e-08	7.08196e-07
ENSMUSG00000027386	Fbln7	3.87565	4.18014	81.4001	2.43634e-08	7.12505e-07
ENSMUSG00000067212	H2-T23	0.784667	6.76776	79.5673	2.43991e-08	7.12505e-07
ENSMUSG00000031434	Morc4	-1.58478	5.87487	80.5491	2.47001e-08	7.20049e-07
ENSMUSG00000030147	Clec4b1	2.00103	3.6834	79.7871	2.51148e-08	7.21366e-07
ENSMUSG00000017561	Crlf3	0.903858	4.59784	79.2393	2.52145e-08	7.21366e-07
ENSMUSG00000021094	Dhrs7	-0.839653	6.22373	79.311	2.50337e-08	7.21366e-07
ENSMUSG00000024456	Diap1	0.764488	6.97838	79.2766	2.51203e-08	7.21366e-07
ENSMUSG00000068758	Il3ra	1.47833	5.18714	79.706	2.51794e-08	7.21366e-07
ENSMUSG00000030499	Kctd15	-1.3019	4.17802	79.2432	2.52047e-08	7.21366e-07
ENSMUSG00000025044	Msr1	3.22368	5.37737	81.5526	2.51629e-08	7.21366e-07
ENSMUSG00000029204	Rhoh	2.03671	2.81692	79.3153	2.5023e-08	7.21366e-07
ENSMUSG00000022964	Tmem50b	-0.886868	6.05357	79.2969	2.50691e-08	7.21366e-07
ENSMUSG00000034265	Zdhhc14	1.48137	3.89442	79.3316	2.49819e-08	7.21366e-07
ENSMUSG00000029190	D5Ertd579e	-0.801448	7.051	79.062	2.56677e-08	7.3309e-07
ENSMUSG00000029822	Osbpl3	2.06623	3.51854	79.4721	2.58335e-08	7.34106e-07
ENSMUSG00000025537	Phkg1	-2.2043	3.08498	79.6632	2.57964e-08	7.34106e-07
ENSMUSG00000069793	Slfn9	1.72305	3.30458	79.0238	2.57666e-08	7.34106e-07
ENSMUSG00000036446	Lum	2.21269	7.58971	80.2198	2.58774e-08	7.34119e-07
ENSMUSG00000032436	Cmtm7	1.63061	4.31859	79.1304	2.59353e-08	7.3453e-07
ENSMUSG00000020399	Havcr2	3.23483	2.21429	79.093	2.60158e-08	7.35578e-07
ENSMUSG00000005107	Slc2a9	0.993409	3.01203	78.9014	2.60859e-08	7.36328e-07
ENSMUSG00000031534	Smim19	-1.07307	4.88897	78.8802	2.61418e-08	7.36677e-07
ENSMUSG00000031833	Mast3	1.08443	5.59511	78.8137	2.63176e-08	7.3678e-07
ENSMUSG00000024300	Myo1f	3.15185	7.23907	80.3782	2.63198e-08	7.3678e-07
ENSMUSG00000025402	Nab2	0.99025	5.33014	78.8458	2.62326e-08	7.3678e-07
ENSMUSG00000052485	Tmem171	6.05416	0.202675	78.8131	2.63192e-08	7.3678e-07
ENSMUSG00000073492	Gm10521	3.42624	1.94932	78.6778	2.66809e-08	7.45655e-07
ENSMUSG00000021965	Ska3	2.36724	1.11982	78.5941	2.69074e-08	7.50742e-07
ENSMUSG00000064109	Hcst	1.8752	1.75544	78.5744	2.69611e-08	7.51002e-07
ENSMUSG00000031662	Snx20	2.05176	3.79404	79.1198	2.75681e-08	7.66648e-07
ENSMUSG00000040543	Pitpnm3	-1.37736	3.38008	78.237	2.7898e-08	7.74546e-07
ENSMUSG00000020658	Efr3b	2.68035	5.45366	79.5019	2.8037e-08	7.77129e-07
ENSMUSG00000029771	Irf5	2.04213	6.1271	79.4551	2.81668e-08	7.79451e-07
ENSMUSG00000054293	A630033H20Rik	2.55404	2.48157	78.1208	2.82291e-08	7.79898e-07
ENSMUSG00000032698	Lmo2	1.72593	5.862	79.2459	2.84887e-08	7.84508e-07
ENSMUSG00000024084	Qpct	2.22121	4.75247	79.3463	2.84719e-08	7.84508e-07
ENSMUSG00000035158	Mitf	1.47456	4.69281	78.0275	2.88628e-08	7.93515e-07
ENSMUSG00000059555	Tor4a	1.18164	4.89535	77.6771	2.95333e-08	8.1063e-07
ENSMUSG00000033773	Rpap2	-0.785577	4.19436	77.5008	3.00697e-08	8.22683e-07
ENSMUSG00000042608	Stk40	-0.70903	6.31147	77.5028	3.00636e-08	8.22683e-07
ENSMUSG00000062604	Srpk2	-0.653627	5.89102	77.4443	3.02438e-08	8.26111e-07
ENSMUSG00000020610	Amz2	-0.553821	5.635	77.3373	3.05767e-08	8.29113e-07
ENSMUSG00000046323	Dppa3	4.03438	1.04374	77.3581	3.05118e-08	8.29113e-07
ENSMUSG00000060594	Layn	1.45306	3.48035	77.3146	3.0648e-08	8.29113e-07
ENSMUSG00000037972	Snn	-0.922	5.77381	77.3245	3.06168e-08	8.29113e-07
ENSMUSG00000007613	Tgfbr1	1.10556	5.54902	77.319	3.06342e-08	8.29113e-07
ENSMUSG00000073680	Tmem88b	-3.55723	2.94104	78.6516	3.05066e-08	8.29113e-07
ENSMUSG00000030094	Xpc	-0.727045	5.13859	77.2849	3.07414e-08	8.30313e-07
ENSMUSG00000039873	Neurl2	1.6427	3.62392	77.2258	3.09281e-08	8.34024e-07
ENSMUSG00000015850	Adamtsl4	-1.38978	5.21225	77.6514	3.13117e-08	8.43024e-07
ENSMUSG00000039055	Eme1	2.13436	1.05104	77.0604	3.14574e-08	8.45599e-07
ENSMUSG00000021416	Eci3	-3.42839	3.08116	78.2957	3.1611e-08	8.48379e-07
ENSMUSG00000021886	Gpr65	3.02278	3.63543	78.0728	3.2325e-08	8.64796e-07
ENSMUSG00000075590	Nrbp2	-2.02612	6.37001	78.0776	3.23095e-08	8.64796e-07
ENSMUSG00000024909	Efemp2	1.15193	5.21939	76.7091	3.26151e-08	8.68434e-07
ENSMUSG00000041515	Irf8	1.91121	6.09422	77.9045	3.25737e-08	8.68434e-07
ENSMUSG00000061119	Prcp	1.51781	6.17375	77.4386	3.25158e-08	8.68434e-07
ENSMUSG00000086763	B230378P21Rik	2.01335	0.923314	76.6083	3.29559e-08	8.73383e-07
ENSMUSG00000030172	Erc1	-0.685074	4.96625	76.6228	3.29066e-08	8.73383e-07
ENSMUSG00000046157	Tmem229b	1.06497	4.9418	76.6175	3.29245e-08	8.73383e-07
ENSMUSG00000024302	Dtna	-2.68365	2.76073	77.4532	3.30395e-08	8.74229e-07
ENSMUSG00000032661	Oas3	2.78584	1.98056	76.4891	3.33638e-08	8.80054e-07
ENSMUSG00000025178	Pi4k2a	0.986297	6.7098	76.4999	3.33268e-08	8.80054e-07
ENSMUSG00000002870	Mcm2	1.42916	4.25275	76.434	3.35544e-08	8.83704e-07
ENSMUSG00000032122	Slc37a2	4.08954	7.15769	78.567	3.36599e-08	8.85104e-07
ENSMUSG00000073421	H2-Ab1	1.24069	9.12152	76.3193	3.39547e-08	8.9147e-07
ENSMUSG00000022148	Fyb	3.33005	5.47972	78.4591	3.40213e-08	8.91833e-07
ENSMUSG00000027306	Nusap1	1.47691	3.06846	76.1252	3.46445e-08	9.06765e-07
ENSMUSG00000029922	Mkrn1	0.585024	6.06553	76.0327	3.49784e-08	9.1387e-07
ENSMUSG00000040105	Ppapdc2	-1.25402	5.23521	76.0542	3.50241e-08	9.1387e-07
ENSMUSG00000003814	Calr	0.77556	9.44264	75.9372	3.5327e-08	9.18936e-07
ENSMUSG00000064043	Trerf1	1.53486	4.86269	76.4402	3.52968e-08	9.18936e-07
ENSMUSG00000044477	Zfand3	-0.996677	7.68843	75.8789	3.55417e-08	9.23101e-07
ENSMUSG00000084932	Gm15156	4.06363	-0.117744	75.8593	3.56145e-08	9.23574e-07
ENSMUSG00000031264	Btk	2.30527	4.66502	77.049	3.58417e-08	9.28042e-07
ENSMUSG00000052384	Nrros	1.78872	6.46317	76.916	3.59978e-08	9.30658e-07
ENSMUSG00000020303	Stc2	-2.36419	4.85821	76.9191	3.63172e-08	9.37482e-07
ENSMUSG00000041736	Tspo	-1.017	7.59986	75.4685	3.70948e-08	9.56096e-07
ENSMUSG00000020635	Fkbp1b	1.95721	2.28127	75.3902	3.73991e-08	9.62331e-07
ENSMUSG00000031930	Wwp2	0.862932	5.63322	75.3771	3.74505e-08	9.62331e-07
ENSMUSG00000031563	Wwc2	-0.876541	6.00665	75.2733	3.78595e-08	9.71364e-07
ENSMUSG00000031980	Agt	-3.0633	6.90133	77.3115	3.81435e-08	9.77168e-07
ENSMUSG00000032652	Crebl2	-0.709796	5.15516	75.1435	3.83774e-08	9.81671e-07
ENSMUSG00000019768	Esr1	-1.43208	4.7065	75.5262	3.85646e-08	9.8497e-07
ENSMUSG00000028068	Iqgap3	2.23342	3.1991	75.377	3.92537e-08	1.00106e-06
ENSMUSG00000037868	Egr2	3.20512	4.84569	76.5085	3.97115e-08	1.01121e-06
ENSMUSG00000072620	Slfn2	2.29005	5.44393	75.9671	4.00226e-08	1.0176e-06
ENSMUSG00000029718	Pcolce	1.54223	7.13979	75.0612	4.06354e-08	1.03163e-06
ENSMUSG00000044827	Tlr1	3.05074	4.59881	75.9104	4.08191e-08	1.03474e-06
ENSMUSG00000028656	Cap1	0.867413	8.36445	74.5361	4.0908e-08	1.03544e-06
ENSMUSG00000026065	Slc9a4	2.89752	2.57399	74.8179	4.16118e-08	1.05168e-06
ENSMUSG00000039294	BC017643	0.783736	5.40582	74.356	4.16932e-08	1.05216e-06
ENSMUSG00000044694	2010007H06Rik	-2.15079	2.04948	74.3338	4.17913e-08	1.05276e-06
ENSMUSG00000001334	Fndc5	4.00455	1.96824	74.9878	4.18413e-08	1.05276e-06
ENSMUSG00000091498	Mpc1-ps	-1.34372	4.2059	74.2486	4.21694e-08	1.05944e-06
ENSMUSG00000047454	Gphn	-0.94765	5.18315	74.1866	4.2447e-08	1.06218e-06
ENSMUSG00000025477	Inpp5a	-0.975858	6.39166	74.1918	4.24236e-08	1.06218e-06
ENSMUSG00000034591	Slc41a2	1.54793	4.70051	74.5803	4.26611e-08	1.06546e-06
ENSMUSG00000022952	Runx1	1.81987	4.4626	74.948	4.27369e-08	1.06577e-06
ENSMUSG00000050103	Agmo	-1.19954	5.13768	74.0455	4.30867e-08	1.07291e-06
ENSMUSG00000032812	Arap1	1.67902	6.74749	74.9068	4.34003e-08	1.07914e-06
ENSMUSG00000031438	Rnf128	4.68672	5.30643	76.0178	4.34646e-08	1.07915e-06
ENSMUSG00000024610	Cd74	1.25464	10.4283	73.9239	4.36458e-08	1.08206e-06
ENSMUSG00000023143	Nagpa	0.996753	5.19212	73.8767	4.38651e-08	1.0859e-06
ENSMUSG00000035561	Aldh1b1	1.98546	1.7325	73.8566	4.39592e-08	1.08664e-06
ENSMUSG00000025283	Sat1	0.940298	6.85026	73.829	4.40882e-08	1.08824e-06
ENSMUSG00000038147	Cd84	3.35374	6.91204	75.7719	4.45657e-08	1.09842e-06
ENSMUSG00000032531	Amotl2	-1.70998	7.65005	74.5669	4.49654e-08	1.10554e-06
ENSMUSG00000027890	Gstm4	-1.39898	4.89579	74.0761	4.49854e-08	1.10554e-06
ENSMUSG00000073700	Klhl21	-0.723219	5.04619	73.6138	4.51096e-08	1.10699e-06
ENSMUSG00000060038	Dhps	0.567786	4.26726	73.5687	4.53266e-08	1.1107e-06
ENSMUSG00000037860	Aim2	1.54045	3.37502	73.4667	4.58226e-08	1.12123e-06
ENSMUSG00000031373	Car5b	-1.7059	7.78302	74.2467	4.59869e-08	1.1226e-06
ENSMUSG00000086587	Gm11837	-3.5457	0.617366	73.4281	4.60115e-08	1.1226e-06
ENSMUSG00000092517	Art2a-ps	6.00736	0.57191	73.3423	4.6435e-08	1.12796e-06
ENSMUSG00000022021	Diap3	2.17882	2.30884	73.3296	4.6498e-08	1.12796e-06
ENSMUSG00000063646	Jakmip1	2.42941	0.642846	73.3385	4.64541e-08	1.12796e-06
ENSMUSG00000024807	Syvn1	-0.66181	6.51245	73.3153	4.65691e-08	1.12807e-06
ENSMUSG00000006423	C330007P06Rik	-0.639672	6.03888	73.1664	4.73171e-08	1.14149e-06
ENSMUSG00000048216	Gpr85	2.87726	1.32116	73.1727	4.72853e-08	1.14149e-06
ENSMUSG00000085295	4930430E12Rik	4.91931	1.96468	74.1559	4.7854e-08	1.14816e-06
ENSMUSG00000020810	Cygb	1.12481	7.36323	73.0635	4.78413e-08	1.14816e-06
ENSMUSG00000051977	Prdm9	-0.806082	3.21115	73.0871	4.77205e-08	1.14816e-06
ENSMUSG00000039865	Slc44a3	-1.76449	3.92205	73.7423	4.78741e-08	1.14816e-06
ENSMUSG00000036863	Syde2	-1.50937	3.43351	72.9074	4.86491e-08	1.1651e-06
ENSMUSG00000005442	Cic	0.83109	7.45044	72.8082	4.91705e-08	1.17592e-06
ENSMUSG00000028063	Lmna	0.939271	8.09636	72.7393	4.95362e-08	1.18299e-06
ENSMUSG00000026604	Ptpn14	-1.01011	5.76952	72.6866	4.98176e-08	1.18731e-06
ENSMUSG00000079442	St6galnac4	1.25769	5.21034	72.6792	4.98573e-08	1.18731e-06
ENSMUSG00000020889	Nr1d1	-1.56229	8.56965	72.7351	4.99762e-08	1.18846e-06
ENSMUSG00000036894	Rap2b	1.22978	5.6948	72.6295	5.0125e-08	1.18994e-06
ENSMUSG00000028832	Stmn1	2.23096	4.75182	73.788	5.01792e-08	1.18994e-06
ENSMUSG00000023452	Pisd	0.593367	5.15758	72.5521	5.05446e-08	1.19693e-06
ENSMUSG00000026664	Phyh	-1.20589	6.80052	72.5317	5.06556e-08	1.19788e-06
ENSMUSG00000002668	Dennd1c	1.45572	4.55094	72.608	5.08492e-08	1.20078e-06
ENSMUSG00000052760	A630001G21Rik	1.95123	3.90194	73.1317	5.10741e-08	1.20302e-06
ENSMUSG00000042672	Dcst1	-2.23988	3.75089	73.5064	5.13662e-08	1.20302e-06
ENSMUSG00000027199	Gatm	2.19175	4.60842	73.5776	5.13017e-08	1.20302e-06
ENSMUSG00000026288	Inpp5d	2.04154	5.90743	73.5801	5.12881e-08	1.20302e-06
ENSMUSG00000032322	Pstpip1	2.07264	4.52173	73.481	5.13709e-08	1.20302e-06
ENSMUSG00000018566	Slc2a4	-2.63784	7.06886	73.9346	5.11044e-08	1.20302e-06
ENSMUSG00000016559	H3f3b	0.812588	7.74233	72.373	5.1531e-08	1.20373e-06
ENSMUSG00000030246	Ldhb	-1.67674	5.43969	73.4475	5.15524e-08	1.20373e-06
ENSMUSG00000022558	Mroh1	0.920419	6.21418	72.3478	5.16709e-08	1.20373e-06
ENSMUSG00000074785	Plxnc1	2.29443	4.02009	73.4196	5.17044e-08	1.20373e-06
ENSMUSG00000026547	Tagln2	1.32715	8.36073	72.3324	5.17574e-08	1.20373e-06
ENSMUSG00000037805	Rpl10a	0.748375	7.5975	72.2862	5.20161e-08	1.20809e-06
ENSMUSG00000002233	Rhoc	0.959425	7.67634	72.2527	5.2205e-08	1.21081e-06
ENSMUSG00000030861	Acadsb	-1.31753	6.80182	72.4045	5.25081e-08	1.21285e-06
ENSMUSG00000047810	Ccdc88b	1.62471	3.98019	72.326	5.24176e-08	1.21285e-06
ENSMUSG00000023505	Cdca3	1.70615	3.47712	72.208	5.24582e-08	1.21285e-06
ENSMUSG00000021241	Isca2	-0.74986	5.60499	72.1765	5.26369e-08	1.21417e-06
ENSMUSG00000015133	Lrrk1	1.1301	5.14066	72.1389	5.28519e-08	1.21581e-06
ENSMUSG00000036381	P2ry14	2.07218	2.90066	72.1505	5.27854e-08	1.21581e-06
ENSMUSG00000024691	Fam111a	1.60102	5.65802	73.0115	5.30081e-08	1.21775e-06
ENSMUSG00000046034	Fam105b	0.745238	4.87361	72.0348	5.34511e-08	1.22626e-06
ENSMUSG00000021280	Exoc3l4	1.04583	2.74682	72.002	5.36413e-08	1.22895e-06
ENSMUSG00000043673	Kcns3	-1.98651	5.054	73.1239	5.38173e-08	1.23132e-06
ENSMUSG00000044147	Arf6	0.803237	5.90993	71.9273	5.4078e-08	1.23394e-06
ENSMUSG00000017861	Mybl2	1.60435	1.75828	71.9388	5.40104e-08	1.23394e-06
ENSMUSG00000009687	Fxyd5	1.70027	6.85337	72.8538	5.42565e-08	1.23635e-06
ENSMUSG00000005360	Slc1a3	-2.37138	6.34492	73.183	5.4532e-08	1.24095e-06
ENSMUSG00000061130	Ppm1b	-0.891581	5.9043	71.737	5.52074e-08	1.25333e-06
ENSMUSG00000024990	Rbp4	-2.60814	8.64344	72.8803	5.52241e-08	1.25333e-06
ENSMUSG00000011832	Evi5l	-0.683918	5.60623	71.6822	5.55375e-08	1.25726e-06
ENSMUSG00000004891	Nes	1.43944	6.69656	72.099	5.55462e-08	1.25726e-06
ENSMUSG00000004677	Myo9b	1.22705	6.76293	71.661	5.56663e-08	1.2583e-06
ENSMUSG00000044811	AF251705	3.32323	5.2943	73.5412	5.60947e-08	1.2646e-06
ENSMUSG00000024121	Atp6v0c	1.04858	5.9189	71.594	5.60739e-08	1.2646e-06
ENSMUSG00000021340	Gpld1	-1.63041	3.31501	71.429	5.70917e-08	1.27906e-06
ENSMUSG00000002833	Hdgfrp2	0.775972	5.05055	71.4565	5.69207e-08	1.27906e-06
ENSMUSG00000027332	Ivd	-1.68985	7.36741	72.4815	5.71144e-08	1.27906e-06
ENSMUSG00000027940	Tpm3	0.824636	8.23598	71.4283	5.70961e-08	1.27906e-06
ENSMUSG00000038949	Cnst	-0.72676	5.03941	71.3473	5.76031e-08	1.2883e-06
ENSMUSG00000057614	Gnai1	-1.54642	7.89445	71.7563	5.80629e-08	1.29687e-06
ENSMUSG00000028496	Mllt3	-0.969522	4.06482	71.2459	5.82448e-08	1.29921e-06
ENSMUSG00000014686	Ceacam16	3.37025	1.42413	71.1672	5.87487e-08	1.30667e-06
ENSMUSG00000019433	Gipc1	0.823302	5.37491	71.1575	5.88111e-08	1.30667e-06
ENSMUSG00000040229	Gpr34	1.97687	3.84686	71.8765	5.87476e-08	1.30667e-06
ENSMUSG00000040410	Fbxl4	-1.10504	5.48731	71.0841	5.92855e-08	1.31548e-06
ENSMUSG00000044792	Isca1	-0.778808	5.78031	70.9928	5.98819e-08	1.32618e-06
ENSMUSG00000040522	Tlr8	3.5292	4.85154	72.9108	5.99242e-08	1.32618e-06
ENSMUSG00000038594	Cep85l	-0.87456	3.80268	70.968	6.0045e-08	1.32711e-06
ENSMUSG00000024858	Adrbk1	0.755013	7.11087	70.9096	6.04306e-08	1.33389e-06
ENSMUSG00000032359	Ctsh	1.49557	7.01385	71.3733	6.05947e-08	1.33577e-06
ENSMUSG00000030317	Timp4	-3.78366	8.01683	72.7699	6.08189e-08	1.33897e-06
ENSMUSG00000051851	Cxx1c	-1.29779	4.23958	70.7208	6.1698e-08	1.35655e-06
ENSMUSG00000050965	Prkca	-1.17844	4.24862	70.7005	6.18354e-08	1.35781e-06
ENSMUSG00000026617	Bpnt1	-0.951018	5.68741	70.6647	6.20799e-08	1.36141e-06
ENSMUSG00000021494	Ddx41	0.638373	5.26053	70.6179	6.24006e-08	1.36667e-06
ENSMUSG00000039936	Pik3cd	1.85068	5.77763	71.6141	6.29819e-08	1.37611e-06
ENSMUSG00000001228	Uhrf1	1.71666	3.96427	70.9084	6.29944e-08	1.37611e-06
ENSMUSG00000041084	Ostc	0.85822	5.4546	70.5066	6.31705e-08	1.37818e-06
ENSMUSG00000020152	Actr2	1.10783	7.71843	70.4938	6.32598e-08	1.37835e-06
ENSMUSG00000035697	Hmha1	1.49479	6.67458	71.103	6.33442e-08	1.37841e-06
ENSMUSG00000040859	Bsdc1	-0.581812	6.01078	70.3585	6.42114e-08	1.39548e-06
ENSMUSG00000062929	Cfl2	-0.899332	6.24993	70.3164	6.45109e-08	1.40019e-06
ENSMUSG00000020848	Doc2b	2.02341	2.45409	70.2963	6.46544e-08	1.40151e-06
ENSMUSG00000015950	Ncf1	2.07453	5.87056	71.3688	6.49134e-08	1.40532e-06
ENSMUSG00000039748	Exo1	2.58924	0.782203	70.2307	6.51244e-08	1.40809e-06
ENSMUSG00000025525	Apool	-0.77401	4.63168	70.1566	6.56611e-08	1.41788e-06
ENSMUSG00000020580	Rock2	-1.23693	7.30716	70.113	6.59789e-08	1.42292e-06
ENSMUSG00000029762	Akr1b8	1.70417	5.64491	71.121	6.61029e-08	1.42378e-06
ENSMUSG00000020773	Trim47	1.17896	5.854	70.0366	6.65398e-08	1.43137e-06
ENSMUSG00000027715	Ccna2	2.20731	3.96183	71.0179	6.68457e-08	1.43612e-06
ENSMUSG00000027323	Rad51	2.22805	2.20984	69.8942	6.75987e-08	1.44678e-06
ENSMUSG00000040710	St8sia4	1.20894	4.82224	69.9047	6.75206e-08	1.44678e-06
ENSMUSG00000058317	Ube2e2	-0.869439	4.59621	69.9029	6.75338e-08	1.44678e-06
ENSMUSG00000079227	Ccr5	3.15183	6.09337	71.7542	6.77234e-08	1.44762e-06
ENSMUSG00000026683	Nuf2	2.33325	2.37622	69.844	6.79771e-08	1.45121e-06
ENSMUSG00000097415	AU020206	0.978242	5.49409	69.8169	6.81819e-08	1.45375e-06
ENSMUSG00000017400	Stac2	2.71751	4.02604	70.8469	6.86837e-08	1.4626e-06
ENSMUSG00000035936	Aldh5a1	-1.54822	4.63804	70.3388	6.9479e-08	1.46844e-06
ENSMUSG00000019564	Arid3a	1.08304	3.3368	69.6815	6.92163e-08	1.46844e-06
ENSMUSG00000091345	Col6a5	2.27703	7.64993	70.7772	6.92055e-08	1.46844e-06
ENSMUSG00000055493	Epm2a	-1.37864	3.9433	69.6772	6.92492e-08	1.46844e-06
ENSMUSG00000025190	Got1	1.38937	4.25567	69.6532	6.94352e-08	1.46844e-06
ENSMUSG00000021013	Ttc8	-1.18485	3.7397	69.6513	6.94495e-08	1.46844e-06
ENSMUSG00000022033	Pbk	2.56899	2.17131	69.6208	6.96854e-08	1.47096e-06
ENSMUSG00000035212	Leprot	0.575603	6.70967	69.503	7.06069e-08	1.48856e-06
ENSMUSG00000063428	Ddo	-1.45037	3.26622	69.4533	7.09992e-08	1.49163e-06
ENSMUSG00000062352	Itgb1bp1	-0.996161	6.09824	69.4707	7.08613e-08	1.49163e-06
ENSMUSG00000022322	Shcbp1	2.49926	1.66513	69.451	7.10172e-08	1.49163e-06
ENSMUSG00000020284	1810043G02Rik	-0.754527	4.4636	69.4186	7.12747e-08	1.49518e-06
ENSMUSG00000071713	Csf2rb	0.946193	6.65794	69.4035	7.13949e-08	1.49584e-06
ENSMUSG00000057766	Ankrd29	-2.2784	3.78544	70.4731	7.1532e-08	1.49686e-06
ENSMUSG00000071847	Apcdd1	-2.57542	7.00418	70.6552	7.24437e-08	1.51406e-06
ENSMUSG00000036995	Asap3	1.11932	4.36126	69.2472	7.26528e-08	1.51656e-06
ENSMUSG00000015355	Cd48	2.03557	5.02208	70.2868	7.30003e-08	1.52193e-06
ENSMUSG00000015947	Fcgr1	3.36113	4.86572	71.0105	7.33286e-08	1.5269e-06
ENSMUSG00000017716	Birc5	2.50822	3.56757	70.1177	7.37319e-08	1.53341e-06
ENSMUSG00000038179	Slamf7	2.7806	4.67529	70.1335	7.46632e-08	1.54896e-06
ENSMUSG00000078350	Smim1	-1.55414	5.23391	70.0057	7.46428e-08	1.54896e-06
ENSMUSG00000027513	Pck1	-2.90584	10.2414	70.0267	7.51065e-08	1.55625e-06
ENSMUSG00000051212	Gpr183	1.8035	2.99127	68.9307	7.52761e-08	1.55774e-06
ENSMUSG00000060445	Sycp2	-1.78156	0.740961	68.9204	7.53628e-08	1.55774e-06
ENSMUSG00000020935	Dcakd	0.889354	5.19936	68.8541	7.59262e-08	1.56747e-06
ENSMUSG00000081723	Gm15931	2.94504	2.62935	69.4616	7.60612e-08	1.56834e-06
ENSMUSG00000075284	Wipf1	1.21502	6.14559	68.776	7.65958e-08	1.57744e-06
ENSMUSG00000025289	Prdx4	0.645282	5.20494	68.7523	7.67998e-08	1.57972e-06
ENSMUSG00000022494	Shisa9	3.86251	1.81673	69.1491	7.72993e-08	1.58806e-06
ENSMUSG00000031299	Pdha1	-1.08744	8.16343	68.6567	7.76312e-08	1.59295e-06
ENSMUSG00000052459	Atp6v1a	1.23702	7.72279	68.468	7.92996e-08	1.62521e-06
ENSMUSG00000056201	Cfl1	0.886091	9.48172	68.359	8.02821e-08	1.6365e-06
ENSMUSG00000070738	Dgkd	-0.585831	7.36533	68.3848	8.00482e-08	1.6365e-06
ENSMUSG00000085095	Gm15635	-1.93717	0.995597	68.3863	8.00351e-08	1.6365e-06
ENSMUSG00000060803	Gstp1	-0.779994	5.87784	68.3533	8.03343e-08	1.6365e-06
ENSMUSG00000009654	Oit3	3.1974	1.07074	68.3731	8.01547e-08	1.6365e-06
ENSMUSG00000025375	Aatk	-1.27033	5.63905	68.6866	8.05844e-08	1.63962e-06
ENSMUSG00000068329	Htra2	0.720293	5.53077	68.2053	8.16895e-08	1.65811e-06
ENSMUSG00000032788	Pdxk	1.07094	7.50555	68.2086	8.16597e-08	1.65811e-06
ENSMUSG00000018572	Phf23	0.648687	5.83666	68.1848	8.18801e-08	1.65999e-06
ENSMUSG00000031298	Gpr64	-2.97045	3.92714	69.3757	8.23535e-08	1.6636e-06
ENSMUSG00000060036	Rpl3	0.625527	8.64672	68.134	8.23525e-08	1.6636e-06
ENSMUSG00000032802	Srxn1	0.979159	6.14892	68.1443	8.22562e-08	1.6636e-06
ENSMUSG00000029712	Actl6b	-2.6665	-0.515287	68.0874	8.27877e-08	1.66666e-06
ENSMUSG00000032348	Gsta4	-2.74924	4.58071	69.4306	8.28009e-08	1.66666e-06
ENSMUSG00000024056	Ndc80	2.11604	2.27838	68.1046	8.26272e-08	1.66666e-06
ENSMUSG00000059182	Skap2	1.04124	6.33514	68.065	8.29986e-08	1.66866e-06
ENSMUSG00000040370	Lyrm5	-0.816127	5.73576	68.038	8.32527e-08	1.67178e-06
ENSMUSG00000029482	Aacs	-1.80557	6.96743	69.0681	8.34666e-08	1.67408e-06
ENSMUSG00000003873	Bax	0.998519	4.76832	67.988	8.37266e-08	1.67731e-06
ENSMUSG00000021665	Hexb	1.80175	6.97121	68.9445	8.39099e-08	1.67899e-06
ENSMUSG00000040701	Ap1g2	0.573617	5.10782	67.9438	8.41479e-08	1.68176e-06
ENSMUSG00000054619	Mettl7a1	-1.7772	7.58009	68.8148	8.51274e-08	1.69933e-06
ENSMUSG00000022667	Cd200r1	2.95756	4.49122	68.9217	8.64199e-08	1.7231e-06
ENSMUSG00000047881	Rell1	0.89418	5.01462	67.671	8.67995e-08	1.72863e-06
ENSMUSG00000051146	Camk2n2	-1.4349	2.2624	67.6289	8.72162e-08	1.73488e-06
ENSMUSG00000030117	Gdf3	4.47148	2.90828	68.6614	8.73201e-08	1.73491e-06
ENSMUSG00000046761	Fam83h	-1.1149	2.74882	67.4495	8.90198e-08	1.76502e-06
ENSMUSG00000073982	Rhog	1.17637	6.50622	67.4471	8.90443e-08	1.76502e-06
ENSMUSG00000023940	Sgol1	2.47066	1.04885	67.3758	8.97723e-08	1.77737e-06
ENSMUSG00000045980	Tmem104	1.01691	6.18745	67.2778	9.07847e-08	1.79531e-06
ENSMUSG00000038244	Mical2	1.52128	5.67435	67.9818	9.09704e-08	1.79688e-06
ENSMUSG00000015143	Actn1	0.890234	7.32482	67.2308	9.12741e-08	1.80077e-06
ENSMUSG00000054555	Adam12	1.75469	5.76471	68.0355	9.28647e-08	1.83002e-06
ENSMUSG00000040043	Rbms2	-1.0052	6.60673	67.0572	9.31081e-08	1.83268e-06
ENSMUSG00000005087	Cd44	2.40778	7.02061	68.0574	9.34096e-08	1.83648e-06
ENSMUSG00000029095	Ablim2	-1.51094	4.64777	67.6458	9.37031e-08	1.84011e-06
ENSMUSG00000022449	Adamts20	-3.72202	-0.651629	66.9544	9.42132e-08	1.84798e-06
ENSMUSG00000034165	Ccnd3	-0.91539	7.00747	66.8721	9.51083e-08	1.86134e-06
ENSMUSG00000026259	Ngef	2.1961	1.15596	66.8716	9.51146e-08	1.86134e-06
ENSMUSG00000048307	Ankrd46	-0.645127	6.17728	66.6323	9.77716e-08	1.91112e-06
ENSMUSG00000016283	H2-M2	3.0713	1.24706	66.6178	9.79348e-08	1.9121e-06
ENSMUSG00000038034	Igsf8	0.953387	6.23022	66.5265	9.89713e-08	1.92789e-06
ENSMUSG00000050587	Lrrc4c	-2.61721	3.54988	67.5474	9.89177e-08	1.92789e-06
ENSMUSG00000021376	Tpmt	-0.981788	3.79735	66.5055	9.9212e-08	1.93035e-06
ENSMUSG00000024268	Celf4	1.53273	1.88208	66.4351	1.00022e-07	1.9372e-06
ENSMUSG00000008136	Fhl2	1.62663	2.69783	66.4506	9.98428e-08	1.9372e-06
ENSMUSG00000070003	Ssbp4	0.742875	5.7098	66.4207	1.00189e-07	1.93821e-06
ENSMUSG00000005103	Wdr1	0.857405	7.98923	66.3938	1.00501e-07	1.94202e-06
ENSMUSG00000008540	Mgst1	-1.18972	8.98749	66.3323	1.01218e-07	1.95365e-06
ENSMUSG00000021265	Slc25a29	-1.84274	1.78199	66.2948	1.01659e-07	1.95992e-06
ENSMUSG00000008682	Rpl10	0.646119	8.87541	66.2156	1.02595e-07	1.97571e-06
ENSMUSG00000022102	Dok2	1.53597	5.84247	67.0123	1.0273e-07	1.97607e-06
ENSMUSG00000017631	Abr	1.4237	5.65037	66.725	1.03494e-07	1.97851e-06
ENSMUSG00000022270	Fam134b	1.95208	2.94987	66.106	1.03907e-07	1.97851e-06
ENSMUSG00000074219	Gm10644	-2.05015	1.6104	66.127	1.03654e-07	1.97851e-06
ENSMUSG00000052512	Nav2	1.73723	3.04748	66.148	1.03402e-07	1.97851e-06
ENSMUSG00000021785	Ngly1	-0.798516	5.49552	66.1177	1.03766e-07	1.97851e-06
ENSMUSG00000052160	Pld4	1.18312	6.41495	66.1057	1.0391e-07	1.97851e-06
ENSMUSG00000026395	Ptprc	2.24603	6.79658	67.1738	1.0318e-07	1.97851e-06
ENSMUSG00000047793	Sned1	2.326	6.54044	67.1346	1.03639e-07	1.97851e-06
ENSMUSG00000019790	Stxbp5	0.681494	5.24206	66.1529	1.03343e-07	1.97851e-06
ENSMUSG00000029772	Ahcyl2	-1.25722	6.95291	66.1821	1.04549e-07	1.9862e-06
ENSMUSG00000026536	Mnda	1.63495	3.06332	66.0585	1.04481e-07	1.9862e-06
ENSMUSG00000050556	Kcnb1	-1.43262	5.93368	66.8147	1.04794e-07	1.98638e-06
ENSMUSG00000028334	Nans	0.695331	5.3446	66.0348	1.04769e-07	1.98638e-06
ENSMUSG00000045160	Bola3	-0.968293	5.23434	66.0048	1.05135e-07	1.99062e-06
ENSMUSG00000035948	Acss3	-1.81142	5.76841	66.9796	1.05476e-07	1.99485e-06
ENSMUSG00000047904	Sstr2	4.28323	0.180724	65.9113	1.06284e-07	2.00787e-06
ENSMUSG00000033917	Gde1	-0.968155	6.07401	65.7558	1.08225e-07	2.04226e-06
ENSMUSG00000029910	Mad2l1	1.4655	3.453	65.7066	1.08847e-07	2.0517e-06
ENSMUSG00000048371	Pdp2	-0.881728	4.14019	65.6954	1.08989e-07	2.05211e-06
ENSMUSG00000037062	Sh3glb1	-0.646073	8.79519	65.6464	1.09613e-07	2.06156e-06
ENSMUSG00000096606	Gm4980	1.72997	3.90203	66.0758	1.09893e-07	2.06223e-06
ENSMUSG00000046456	Tmem150b	1.79724	1.06165	65.6268	1.09864e-07	2.06223e-06
ENSMUSG00000093661	Eif4e3	-0.785166	5.60229	65.4834	1.1172e-07	2.09188e-06
ENSMUSG00000051242	Pcdhb9	1.84559	1.3852	65.4879	1.11661e-07	2.09188e-06
ENSMUSG00000022708	Zbtb20	-0.698321	6.4397	65.3968	1.12857e-07	2.11082e-06
ENSMUSG00000062753	AI413582	0.912183	4.05513	65.3654	1.13273e-07	2.11402e-06
ENSMUSG00000020176	Grb10	-0.687237	5.78062	65.3556	1.13403e-07	2.11402e-06
ENSMUSG00000029923	Rab19	2.04791	1.07365	65.3608	1.13334e-07	2.11402e-06
ENSMUSG00000035642	Aamdc	-1.32023	5.16953	65.8025	1.13857e-07	2.12015e-06
ENSMUSG00000054474	Thnsl2	-1.34417	4.48966	65.3556	1.15097e-07	2.14088e-06
ENSMUSG00000055805	Fmnl1	1.06946	5.95848	65.0983	1.16876e-07	2.17158e-06
ENSMUSG00000030761	Myo7a	1.21492	5.46463	65.127	1.17065e-07	2.17271e-06
ENSMUSG00000004099	Dnmt1	1.30744	5.59474	65.321	1.18523e-07	2.19254e-06
ENSMUSG00000023277	Twf2	0.794962	5.23132	64.9892	1.18383e-07	2.19254e-06
ENSMUSG00000006411	Pvrl4	2.1101	1.88442	64.9667	1.18697e-07	2.19336e-06
ENSMUSG00000052142	Rasal3	1.96818	3.49813	65.4908	1.19302e-07	2.20215e-06
ENSMUSG00000031262	Cenpi	2.67481	1.65103	64.8492	1.2035e-07	2.21519e-06
ENSMUSG00000063146	Clip2	0.735142	5.57638	64.8455	1.20402e-07	2.21519e-06
ENSMUSG00000062785	Kcnc3	-2.33763	3.75902	65.8366	1.20182e-07	2.21519e-06
ENSMUSG00000038816	Ctnnal1	-1.24238	4.68099	64.8473	1.20753e-07	2.2173e-06
ENSMUSG00000046230	Vps13a	-0.768423	4.68554	64.819	1.20779e-07	2.2173e-06
ENSMUSG00000034520	Gjc1	-1.29343	4.48699	64.8525	1.21236e-07	2.22086e-06
ENSMUSG00000024725	Ostf1	0.701719	6.93496	64.7878	1.21223e-07	2.22086e-06
ENSMUSG00000030346	Rad51ap1	1.70866	2.11075	64.7756	1.21398e-07	2.22142e-06
ENSMUSG00000050335	Lgals3	2.92912	9.82879	65.7057	1.22006e-07	2.22823e-06
ENSMUSG00000033577	Myo6	-0.898584	5.29145	64.7313	1.22033e-07	2.22823e-06
ENSMUSG00000026489	Adck3	-1.13946	5.22728	64.6618	1.23038e-07	2.24282e-06
ENSMUSG00000030062	Rpn1	0.763398	7.17782	64.6577	1.23098e-07	2.24282e-06
ENSMUSG00000046805	Mpeg1	3.1981	8.66512	65.5862	1.23698e-07	2.25133e-06
ENSMUSG00000062075	Lmnb2	0.896585	4.00416	64.5975	1.23976e-07	2.25397e-06
ENSMUSG00000047205	Dusp18	-1.04926	3.51554	64.5466	1.24725e-07	2.26514e-06
ENSMUSG00000058934	Gm16176	-2.01205	0.428927	64.5188	1.25135e-07	2.26873e-06
ENSMUSG00000002055	Spag5	2.15768	2.71529	64.515	1.25191e-07	2.26873e-06
ENSMUSG00000038642	Ctss	3.26721	9.14648	65.3973	1.26426e-07	2.28867e-06
ENSMUSG00000001143	Lman2l	-0.849296	5.03821	64.387	1.27102e-07	2.29844e-06
ENSMUSG00000031375	Bgn	1.41603	9.64096	64.3724	1.27322e-07	2.29996e-06
ENSMUSG00000040213	Ccbl2	-1.71723	3.75687	64.912	1.27623e-07	2.30293e-06
ENSMUSG00000039246	Lyplal1	-1.19136	4.65564	64.2904	1.28566e-07	2.31747e-06
ENSMUSG00000026174	Rqcd1	0.592393	5.04588	64.1966	1.30004e-07	2.34091e-06
ENSMUSG00000032437	Stt3b	-0.59593	7.96421	64.1549	1.30649e-07	2.35001e-06
ENSMUSG00000028059	Arhgef2	0.80404	6.69731	64.116	1.31254e-07	2.35838e-06
ENSMUSG00000020941	Map3k14	0.861954	4.2982	64.0619	1.32101e-07	2.36856e-06
ENSMUSG00000023348	Trip6	-0.892589	5.57845	63.9924	1.33197e-07	2.3857e-06
ENSMUSG00000079553	Kifc1	1.88665	2.60835	63.9494	1.33882e-07	2.39289e-06
ENSMUSG00000090125	Pou3f1	3.50838	0.597456	63.8747	1.35077e-07	2.4117e-06
ENSMUSG00000035828	Pim3	-1.29747	7.0819	64.1355	1.36049e-07	2.42139e-06
ENSMUSG00000036565	Ttyh3	1.17831	6.63679	63.8157	1.36032e-07	2.42139e-06
ENSMUSG00000033031	C330027C09Rik	2.17837	2.74789	63.7583	1.36965e-07	2.43513e-06
ENSMUSG00000056476	Med12l	-1.4036	3.31634	63.7259	1.37497e-07	2.43945e-06
ENSMUSG00000038379	Ttk	2.44837	1.34349	63.7291	1.37444e-07	2.43945e-06
ENSMUSG00000026834	Acvr1c	-1.63857	6.07755	64.6563	1.37784e-07	2.43974e-06
ENSMUSG00000023169	Slc38a1	2.20309	4.20397	64.6552	1.37802e-07	2.43974e-06
ENSMUSG00000019820	Utrn	-1.07591	7.32029	63.6588	1.38602e-07	2.45134e-06
ENSMUSG00000071757	Zhx2	-0.849198	5.08475	63.6293	1.39092e-07	2.45743e-06
ENSMUSG00000056708	Ier5	1.12851	5.10912	63.6066	1.3947e-07	2.46155e-06
ENSMUSG00000046719	Nxph3	1.68413	1.86429	63.5176	1.40963e-07	2.4853e-06
ENSMUSG00000029426	Scarb2	0.606501	7.64045	63.4583	1.41968e-07	2.50042e-06
ENSMUSG00000079547	H2-DMb1	1.80985	6.26988	64.3054	1.43552e-07	2.52105e-06
ENSMUSG00000032413	Rasa2	-0.774949	4.9543	63.375	1.43392e-07	2.52105e-06
ENSMUSG00000033721	Vav3	1.55735	4.60655	63.9095	1.43587e-07	2.52105e-06
ENSMUSG00000018659	Pnpo	-0.753266	4.88402	63.2604	1.45377e-07	2.54719e-06
ENSMUSG00000048234	Rnf149	1.43665	5.42787	63.854	1.45271e-07	2.54719e-06
ENSMUSG00000089762	Ier5l	1.13681	3.8056	63.2399	1.45735e-07	2.55081e-06
ENSMUSG00000003348	Mob3a	0.625285	5.79235	63.1954	1.46516e-07	2.56183e-06
ENSMUSG00000034243	Golgb1	-0.514669	6.78443	63.1756	1.46865e-07	2.56528e-06
ENSMUSG00000029177	Cenpa	1.871	3.81284	63.6959	1.48016e-07	2.58271e-06
ENSMUSG00000007891	Ctsd	1.31883	10.7499	63.0636	1.48857e-07	2.59471e-06
ENSMUSG00000071359	Tbpl1	0.746721	4.46349	63.0324	1.49417e-07	2.6018e-06
ENSMUSG00000001657	Hoxc8	-1.73236	6.5384	63.9195	1.50204e-07	2.61281e-06
ENSMUSG00000025766	D3Ertd751e	-1.24858	4.24709	62.9783	1.50394e-07	2.61343e-06
ENSMUSG00000021238	Aldh6a1	-1.92037	8.16465	63.8157	1.50856e-07	2.61877e-06
ENSMUSG00000097290	1300002E11Rik	-0.903106	3.83013	62.8729	1.52318e-07	2.63132e-06
ENSMUSG00000007950	Abhd8	0.875802	3.33552	62.8641	1.5248e-07	2.63132e-06
ENSMUSG00000027901	Dennd2d	-2.20984	3.53947	63.7899	1.52513e-07	2.63132e-06
ENSMUSG00000017493	Igfbp4	-0.774647	9.30324	62.8831	1.5213e-07	2.63132e-06
ENSMUSG00000028678	Kif2c	2.6625	2.30698	62.9563	1.5211e-07	2.63132e-06
ENSMUSG00000073678	Pgap1	1.59702	3.59422	62.886	1.52076e-07	2.63132e-06
ENSMUSG00000052298	Cdc42se2	0.885232	6.36604	62.8398	1.52928e-07	2.63578e-06
ENSMUSG00000033697	Arhgap39	1.09446	4.99957	62.8175	1.53338e-07	2.64017e-06
ENSMUSG00000066861	Oas1g	2.47147	1.53476	62.7887	1.53873e-07	2.64668e-06
ENSMUSG00000038943	Prc1	2.10215	3.80741	63.6195	1.54393e-07	2.65292e-06
ENSMUSG00000042349	Ikbke	1.70489	5.31214	63.4753	1.57048e-07	2.6958e-06
ENSMUSG00000017740	Slc12a5	-1.28801	2.11425	62.6072	1.57287e-07	2.69718e-06
ENSMUSG00000049687	Fam109b	1.39892	2.02989	62.5852	1.57706e-07	2.70162e-06
ENSMUSG00000097471	5830432E09Rik	2.05647	1.9369	62.5514	1.58354e-07	2.70432e-06
ENSMUSG00000033022	Cdo1	-1.92682	9.84027	63.0831	1.58405e-07	2.70432e-06
ENSMUSG00000051166	Eml5	-1.49619	2.83011	62.5436	1.58504e-07	2.70432e-06
ENSMUSG00000046329	Slc25a23	-1.74293	6.58462	63.4682	1.5842e-07	2.70432e-06
ENSMUSG00000069607	Cd300lh	3.38346	0.836295	62.4965	1.59411e-07	2.71619e-06
ENSMUSG00000020372	Gnb2l1	0.694673	8.81721	62.4908	1.5952e-07	2.71619e-06
ENSMUSG00000040274	Cdk6	1.71851	4.94722	63.2835	1.60661e-07	2.73285e-06
ENSMUSG00000005534	Insr	-0.734049	6.52083	62.4151	1.60993e-07	2.73574e-06
ENSMUSG00000023951	Vegfa	-1.64365	7.68286	63.2309	1.61668e-07	2.74445e-06
ENSMUSG00000036372	Tmem258	0.59754	5.06235	62.3479	1.62311e-07	2.75261e-06
ENSMUSG00000022503	Nubp1	0.694178	4.78568	62.3313	1.62639e-07	2.7554e-06
ENSMUSG00000032392	Parp16	-1.09001	4.2839	62.3219	1.62824e-07	2.75578e-06
ENSMUSG00000023191	Leprel2	1.11375	4.68493	62.3105	1.63048e-07	2.75682e-06
ENSMUSG00000018509	Cenpv	-1.52899	3.67313	62.3681	1.6424e-07	2.76867e-06
ENSMUSG00000045404	Kcnk13	2.53802	3.33874	63.114	1.63929e-07	2.76867e-06
ENSMUSG00000029189	Sel1l3	4.24907	3.50801	63.7023	1.64223e-07	2.76867e-06
ENSMUSG00000019823	Mical1	1.17839	5.07064	62.2271	1.64711e-07	2.77384e-06
ENSMUSG00000027994	Ccdc109b	1.63584	4.15589	62.603	1.67524e-07	2.81564e-06
ENSMUSG00000038524	Fchsd1	0.862414	3.55435	62.0878	1.67526e-07	2.81564e-06
ENSMUSG00000030064	Frmd4b	1.38648	5.98182	62.5471	1.68922e-07	2.83629e-06
ENSMUSG00000054021	Sirt5	-0.806102	3.33681	61.9539	1.70284e-07	2.85632e-06
ENSMUSG00000021423	Ly86	2.30086	5.42367	62.7297	1.72954e-07	2.89822e-06
ENSMUSG00000009376	Met	-1.73853	4.6108	62.6744	1.73148e-07	2.89859e-06
ENSMUSG00000078866	Gm14420	-2.04545	4.32181	62.7106	1.7335e-07	2.89912e-06
ENSMUSG00000025192	Entpd7	1.07542	3.62855	61.7695	1.74164e-07	2.90985e-06
ENSMUSG00000020654	Adcy3	1.27733	6.14016	62.0405	1.75097e-07	2.91669e-06
ENSMUSG00000022485	Hoxc5	-1.72933	4.15198	62.5682	1.74964e-07	2.91669e-06
ENSMUSG00000034258	Mfsd7c	-2.20066	0.758404	61.7181	1.75263e-07	2.91669e-06
ENSMUSG00000050663	Trhde	-1.96878	3.16227	62.2572	1.74926e-07	2.91669e-06
ENSMUSG00000035439	Haus8	1.53102	3.57757	61.6824	1.76029e-07	2.92655e-06
ENSMUSG00000022390	Zc3h7b	-0.654372	6.53026	61.6662	1.76379e-07	2.92949e-06
ENSMUSG00000026490	Cdc42bpa	-0.696128	6.14735	61.6266	1.77238e-07	2.9359e-06
ENSMUSG00000035455	Fignl1	2.43796	2.21876	61.629	1.77186e-07	2.9359e-06
ENSMUSG00000061175	Fnip2	2.08366	5.16015	62.5228	1.77286e-07	2.9359e-06
ENSMUSG00000036896	C1qc	2.19285	8.74751	62.4279	1.77929e-07	2.93775e-06
ENSMUSG00000034707	Gns	0.770941	8.38909	61.5873	1.78093e-07	2.93775e-06
ENSMUSG00000035683	Melk	2.18064	2.0611	61.5927	1.77975e-07	2.93775e-06
ENSMUSG00000017300	Tnnc2	-2.97682	-0.246574	61.6055	1.77696e-07	2.93775e-06
ENSMUSG00000036820	Amdhd2	0.907762	4.85895	61.5587	1.78719e-07	2.94234e-06
ENSMUSG00000021932	Rnaseh2b	1.08049	3.7071	61.535	1.7924e-07	2.94805e-06
ENSMUSG00000068762	Gstm6	-2.58294	3.06421	62.3951	1.80019e-07	2.9561e-06
ENSMUSG00000041426	Hibch	-1.47825	6.46481	62.3278	1.80079e-07	2.9561e-06
ENSMUSG00000042607	Asb4	2.35877	1.30223	61.4668	1.80746e-07	2.95903e-06
ENSMUSG00000026883	Dab2ip	-1.22554	7.29796	61.5141	1.80801e-07	2.95903e-06
ENSMUSG00000022014	Epsti1	1.55252	3.83116	61.567	1.80958e-07	2.95903e-06
ENSMUSG00000027257	Pacsin3	-1.98139	4.37808	62.3632	1.8071e-07	2.95903e-06
ENSMUSG00000026779	Mastl	1.84627	1.67524	61.4488	1.81146e-07	2.95924e-06
ENSMUSG00000063077	Kif1b	-0.476487	7.65985	61.4205	1.81776e-07	2.96668e-06
ENSMUSG00000040747	Cd53	2.51568	6.44363	62.4861	1.82716e-07	2.97054e-06
ENSMUSG00000006398	Cdc20	1.93217	2.88022	61.3802	1.8268e-07	2.97054e-06
ENSMUSG00000058099	Nfam1	2.10763	5.6045	62.2855	1.82402e-07	2.97054e-06
ENSMUSG00000031226	Pbdc1	0.770836	4.14961	61.3792	1.82702e-07	2.97054e-06
ENSMUSG00000004394	Tmed4	-0.547871	6.23456	61.3256	1.8391e-07	2.98707e-06
ENSMUSG00000026708	Cenpl	1.23098	2.51661	61.302	1.84443e-07	2.99287e-06
ENSMUSG00000034636	Zyg11b	-0.460897	5.70295	61.2279	1.86133e-07	3.01738e-06
ENSMUSG00000051391	Ywhag	-0.780607	9.37038	61.1977	1.86828e-07	3.02575e-06
ENSMUSG00000024613	Tcof1	0.553612	5.3363	61.1785	1.87269e-07	3.03e-06
ENSMUSG00000017767	Spata25	4.06725	0.332013	61.1366	1.88238e-07	3.04276e-06
ENSMUSG00000058254	Tspan7	-1.32891	6.66542	61.6263	1.88827e-07	3.04937e-06
ENSMUSG00000026893	Gca	-0.78725	3.09183	61.071	1.89769e-07	3.06166e-06
ENSMUSG00000069237	C78339	-0.717191	6.27252	61.0575	1.90084e-07	3.06381e-06
ENSMUSG00000061666	Gdpd1	1.9549	2.62707	61.0314	1.90697e-07	3.07077e-06
ENSMUSG00000025260	Hsd17b10	-0.858308	5.95146	60.9799	1.91915e-07	3.08451e-06
ENSMUSG00000061455	Stx17	-0.520125	5.5804	60.9873	1.91739e-07	3.08451e-06
ENSMUSG00000003062	Stard3nl	0.708159	4.73236	60.9637	1.923e-07	3.08776e-06
ENSMUSG00000075702	Selm	1.0201	5.03664	60.9211	1.93313e-07	3.10108e-06
ENSMUSG00000021483	Cdk20	1.69274	4.14461	61.4036	1.94201e-07	3.11238e-06
ENSMUSG00000051517	Arhgef39	2.00279	1.7877	60.8547	1.94909e-07	3.12076e-06
ENSMUSG00000017466	Timp2	1.02984	9.50076	60.821	1.95723e-07	3.13084e-06
ENSMUSG00000034853	Acot11	2.0052	3.0519	60.9732	1.96191e-07	3.13535e-06
ENSMUSG00000031379	Pir	-0.948177	3.16446	60.7739	1.96867e-07	3.14317e-06
ENSMUSG00000031447	Lamp1	0.639058	10.1625	60.7463	1.97542e-07	3.14981e-06
ENSMUSG00000056214	Pard6g	-1.52455	3.16758	60.7417	1.97655e-07	3.14981e-06
ENSMUSG00000064202	4430402I18Rik	-1.69738	2.86201	60.6644	1.99558e-07	3.17715e-06
ENSMUSG00000031558	Slit2	2.06178	2.79375	60.6461	2.00011e-07	3.17878e-06
ENSMUSG00000026389	Steap3	1.12632	6.82698	60.6451	2.00036e-07	3.17878e-06
ENSMUSG00000037313	Tacc3	1.31421	3.98586	60.6147	2.00791e-07	3.18776e-06
ENSMUSG00000037259	Dzank1	-1.47916	1.36837	60.5976	2.01217e-07	3.19154e-06
ENSMUSG00000052566	Hook2	1.11382	3.25874	60.5886	2.01443e-07	3.19213e-06
ENSMUSG00000020042	Btbd11	2.44159	1.84358	60.4753	2.04298e-07	3.23093e-06
ENSMUSG00000050627	Gpd1l	-0.669873	5.79883	60.4688	2.04465e-07	3.23093e-06
ENSMUSG00000001552	Jup	-1.36506	8.02906	60.5846	2.04369e-07	3.23093e-06
ENSMUSG00000052593	Adam17	1.13836	6.08286	60.4471	2.05016e-07	3.23662e-06
ENSMUSG00000025817	Nudt5	-0.732031	5.08691	60.3995	2.06233e-07	3.24975e-06
ENSMUSG00000015312	Gadd45b	1.02113	4.42282	60.3613	2.07218e-07	3.26223e-06
ENSMUSG00000060519	Tor3a	0.489073	5.48441	60.336	2.07872e-07	3.26948e-06
ENSMUSG00000019467	Arhgef25	0.618549	4.87845	60.287	2.09143e-07	3.28642e-06
ENSMUSG00000025647	Shisa5	0.64622	7.86001	60.235	2.10503e-07	3.30472e-06
ENSMUSG00000031378	Abcd1	0.81589	6.03109	60.1571	2.12559e-07	3.33391e-06
ENSMUSG00000045636	Mtus1	-0.967021	6.85882	60.0934	2.14257e-07	3.35742e-06
ENSMUSG00000070354	Gm21975	2.50741	1.33507	60.0808	2.14595e-07	3.3596e-06
ENSMUSG00000037709	Fam13a	-2.85101	5.47227	61.5384	2.14957e-07	3.36216e-06
ENSMUSG00000070476	Fam217b	-0.830416	4.7471	60.0236	2.16135e-07	3.3688e-06
ENSMUSG00000024978	Gpam	-1.1001	6.0236	60.0592	2.16179e-07	3.3688e-06
ENSMUSG00000000290	Itgb2	2.70815	7.95453	60.8947	2.15869e-07	3.3688e-06
ENSMUSG00000029363	Rfc5	0.872846	3.56095	60.0254	2.16087e-07	3.3688e-06
ENSMUSG00000021250	Fos	2.43805	5.52743	61.0048	2.16968e-07	3.37799e-06
ENSMUSG00000021375	Kif13a	-0.680088	5.70133	59.9708	2.17565e-07	3.38417e-06
ENSMUSG00000022636	Alcam	0.896633	6.39631	59.9588	2.17893e-07	3.38616e-06
ENSMUSG00000002871	Tpra1	0.750154	5.84349	59.8792	2.20075e-07	3.41693e-06
ENSMUSG00000019326	Aoc3	-1.83014	10.7325	59.8889	2.20967e-07	3.42135e-06
ENSMUSG00000056698	Elmod3	-1.06924	5.11174	59.852	2.20828e-07	3.42135e-06
ENSMUSG00000035109	Shc4	1.66577	1.05649	59.8535	2.20784e-07	3.42135e-06
ENSMUSG00000028327	1300002K09Rik	3.92485	2.9018	60.6774	2.21685e-07	3.42722e-06
ENSMUSG00000001729	Akt1	0.546212	7.38058	59.8186	2.21752e-07	3.42722e-06
ENSMUSG00000002103	Acp2	0.77723	6.7824	59.806	2.22105e-07	3.42954e-06
ENSMUSG00000003644	Rps6ka1	1.23881	5.24452	59.9594	2.22581e-07	3.43376e-06
ENSMUSG00000084960	B430010I23Rik	-2.14941	3.72448	60.6294	2.22995e-07	3.43606e-06
ENSMUSG00000039063	Echdc3	-1.88164	4.27115	60.6242	2.23136e-07	3.43606e-06
ENSMUSG00000056133	Gm9992	-2.91834	-0.404428	59.7473	2.23744e-07	3.43915e-06
ENSMUSG00000053907	Mat2a	-0.715752	8.10629	59.7526	2.23595e-07	3.43915e-06
ENSMUSG00000025153	Fasn	-1.81235	11.9049	59.7176	2.24582e-07	3.44853e-06
ENSMUSG00000020120	Plek	2.97432	6.05851	61.162	2.2493e-07	3.44853e-06
ENSMUSG00000040722	Scamp5	1.01438	5.64845	59.704	2.24966e-07	3.44853e-06
ENSMUSG00000026069	Il1rl1	1.53982	3.72158	59.7191	2.25897e-07	3.45653e-06
ENSMUSG00000036931	Nfkbid	2.07941	2.93102	59.7909	2.2586e-07	3.45653e-06
ENSMUSG00000031545	Agpat6	-0.889651	7.05674	59.5892	2.28232e-07	3.48764e-06
ENSMUSG00000029126	Nsg1	-0.940496	3.27523	59.5854	2.28342e-07	3.48764e-06
ENSMUSG00000031351	Zfp185	-2.07287	4.58519	60.3953	2.29496e-07	3.50209e-06
ENSMUSG00000042647	Acad12	-1.00956	4.75424	59.4964	2.30914e-07	3.52055e-06
ENSMUSG00000034781	Gna11	-0.942929	6.85097	59.4345	2.32719e-07	3.54488e-06
ENSMUSG00000053318	Slamf8	2.43167	3.85174	60.2207	2.34482e-07	3.56852e-06
ENSMUSG00000085558	4930412C18Rik	-1.49111	2.39373	59.3501	2.35209e-07	3.57636e-06
ENSMUSG00000052026	Slc6a7	3.17433	3.03335	60.1836	2.35559e-07	3.57846e-06
ENSMUSG00000012187	Mogat1	-2.76016	3.37654	60.1758	2.35784e-07	3.57867e-06
ENSMUSG00000030789	Itgax	4.088	7.61275	60.722	2.37241e-07	3.59755e-06
ENSMUSG00000029465	Arpc3	0.858321	7.50376	59.2605	2.37885e-07	3.59764e-06
ENSMUSG00000039621	Prex1	1.98928	5.92263	60.1067	2.37805e-07	3.59764e-06
ENSMUSG00000028538	St3gal3	-0.925766	6.2497	59.2613	2.37861e-07	3.59764e-06
ENSMUSG00000062312	Erbb2	-0.976117	4.0443	59.2397	2.38509e-07	3.60385e-06
ENSMUSG00000097773	Gm10614	-1.8027	0.41599	59.2301	2.38801e-07	3.60504e-06
ENSMUSG00000039616	Mocos	0.855758	5.12704	59.1955	2.39847e-07	3.61438e-06
ENSMUSG00000025231	Sufu	-0.771482	5.61821	59.2022	2.39643e-07	3.61438e-06
ENSMUSG00000026429	Ube2t	2.00418	0.986434	59.1696	2.4063e-07	3.62296e-06
ENSMUSG00000024795	Kif20b	1.85666	2.21289	59.0112	2.45503e-07	3.68986e-06
ENSMUSG00000028702	Rad54l	2.15735	1.93788	59.011	2.45511e-07	3.68986e-06
ENSMUSG00000001661	Hoxc6	-1.4006	4.84802	59.5735	2.45836e-07	3.69146e-06
ENSMUSG00000033949	Trim36	1.73914	2.52544	58.9824	2.46401e-07	3.69667e-06
ENSMUSG00000017774	Myo1c	-1.27316	8.97932	58.974	2.46664e-07	3.69729e-06
ENSMUSG00000039193	Nlrc4	2.28137	2.2954	58.9671	2.4688e-07	3.69729e-06
ENSMUSG00000004032	Gstm5	-1.25368	4.67661	59.1165	2.47443e-07	3.70245e-06
ENSMUSG00000016200	Syt14	-4.12343	0.406845	58.9605	2.49607e-07	3.73153e-06
ENSMUSG00000026102	Inpp1	-0.652705	4.46101	58.8651	2.50095e-07	3.73552e-06
ENSMUSG00000042724	Map3k9	2.31519	1.19791	58.8091	2.51878e-07	3.75882e-06
ENSMUSG00000057729	Prtn3	-1.85497	1.78302	58.7841	2.52681e-07	3.76749e-06
ENSMUSG00000028551	Cdkn2c	-1.52027	6.65237	59.5207	2.53815e-07	3.78106e-06
ENSMUSG00000052419	2610001J05Rik	0.571503	5.77556	58.7039	2.55271e-07	3.7963e-06
ENSMUSG00000032089	Il10ra	1.96842	5.52161	59.534	2.55287e-07	3.7963e-06
ENSMUSG00000022602	Arc	1.79018	1.93587	58.6888	2.55761e-07	3.80001e-06
ENSMUSG00000040268	Plekha1	0.491243	6.03916	58.665	2.56536e-07	3.80818e-06
ENSMUSG00000028278	Rragd	2.9111	1.59142	58.653	2.56927e-07	3.81064e-06
ENSMUSG00000030029	Lrig1	-1.15709	5.56656	58.8704	2.57573e-07	3.81687e-06
ENSMUSG00000013663	Pten	-0.608709	6.82822	58.6071	2.58434e-07	3.82628e-06
ENSMUSG00000039116	Gpr126	1.45389	3.26407	58.4987	2.62029e-07	3.85955e-06
ENSMUSG00000035878	Hykk	-1.12027	3.34099	58.5008	2.61958e-07	3.85955e-06
ENSMUSG00000038451	Spsb2	0.931568	4.04269	58.4989	2.62022e-07	3.85955e-06
ENSMUSG00000049858	Suox	-1.14865	4.34687	58.5265	2.61101e-07	3.85955e-06
ENSMUSG00000027469	Tpx2	2.35258	3.83596	59.324	2.62051e-07	3.85955e-06
ENSMUSG00000030035	Wbp1	-0.709364	5.1964	58.4997	2.61995e-07	3.85955e-06
ENSMUSG00000071253	Slc25a16	-1.05129	5.47634	58.4619	2.63261e-07	3.87063e-06
ENSMUSG00000054676	1600014C10Rik	-1.02643	6.98585	58.4536	2.6354e-07	3.87136e-06
ENSMUSG00000038005	2700029M09Rik	0.619126	4.48347	58.4169	2.64779e-07	3.88333e-06
ENSMUSG00000031101	Sash3	2.0449	4.82544	59.2329	2.65044e-07	3.88333e-06
ENSMUSG00000022769	Sdf2l1	1.27737	4.70258	58.5115	2.6487e-07	3.88333e-06
ENSMUSG00000020598	Nrcam	3.98408	4.63086	59.7696	2.66523e-07	3.90163e-06
ENSMUSG00000028944	Prkag2	-0.881642	5.69166	58.3478	2.67123e-07	3.90497e-06
ENSMUSG00000023942	Slc29a1	0.828865	6.13414	58.3452	2.67214e-07	3.90497e-06
ENSMUSG00000027510	Rbm38	-1.13531	4.05631	58.2867	2.69221e-07	3.9309e-06
ENSMUSG00000079625	Tm4sf19	4.64339	3.79488	59.6275	2.71224e-07	3.95673e-06
ENSMUSG00000021281	Tnfaip2	1.79814	6.27886	59.0253	2.72014e-07	3.96484e-06
ENSMUSG00000044583	Tlr7	2.0444	4.29139	58.9716	2.73848e-07	3.98813e-06
ENSMUSG00000040276	Pacsin1	2.27736	-0.145586	58.0927	2.7599e-07	4.01588e-06
ENSMUSG00000039682	Lap3	-0.826687	6.35192	58.0622	2.77073e-07	4.02816e-06
ENSMUSG00000005951	Shpk	-1.00069	4.00501	57.954	2.80945e-07	4.08094e-06
ENSMUSG00000031543	Ank1	1.7855	1.57374	57.918	2.82248e-07	4.09635e-06
ENSMUSG00000034959	5031414D18Rik	1.71638	1.82545	57.8816	2.83574e-07	4.11207e-06
ENSMUSG00000026211	Obsl1	1.13223	3.42075	57.8254	2.85629e-07	4.13831e-06
ENSMUSG00000021957	Tkt	-1.34355	9.59369	57.7621	2.87964e-07	4.16858e-06
ENSMUSG00000074918	5430417L22Rik	-0.913543	4.96602	57.7278	2.8924e-07	4.17632e-06
ENSMUSG00000051652	Lrrc3	-1.45297	4.1976	58.1823	2.88851e-07	4.17632e-06
ENSMUSG00000051343	Rab11fip5	1.25254	7.1277	57.8274	2.89089e-07	4.17632e-06
ENSMUSG00000044724	Gpr152	-1.89094	-0.787456	57.6977	2.90363e-07	4.18896e-06
ENSMUSG00000007038	Neu1	0.673992	5.88442	57.5832	2.94685e-07	4.24406e-06
ENSMUSG00000033740	St18	4.09569	0.926345	57.5704	2.95173e-07	4.24748e-06
ENSMUSG00000026077	Npas2	2.55656	1.77415	57.5593	2.95594e-07	4.24991e-06
ENSMUSG00000021591	Glrx	1.45406	3.94482	57.5676	2.97624e-07	4.27546e-06
ENSMUSG00000054181	A930012O16Rik	-1.35179	1.44458	57.491	2.98214e-07	4.27677e-06
ENSMUSG00000039518	Cdsn	-2.19775	7.40101	58.2872	2.98473e-07	4.27677e-06
ENSMUSG00000001918	Slc1a5	-1.54326	10.8299	57.4864	2.98393e-07	4.27677e-06
ENSMUSG00000012705	Retn	-3.1382	9.40195	58.489	2.98743e-07	4.277e-06
ENSMUSG00000039496	Cdnf	-1.33614	3.26349	57.4634	2.99281e-07	4.28108e-06
ENSMUSG00000036887	C1qa	2.02596	8.48954	58.1681	3.00799e-07	4.29916e-06
ENSMUSG00000068744	Psrc1	1.90068	1.26889	57.3864	3.02274e-07	4.31659e-06
ENSMUSG00000085058	8030453O22Rik	2.68683	1.23266	57.284	3.0631e-07	4.37054e-06
ENSMUSG00000020251	Glt8d2	-1.55268	2.69843	57.2706	3.06844e-07	4.37447e-06
ENSMUSG00000020914	Top2a	2.27854	4.86736	58.0448	3.0777e-07	4.38398e-06
ENSMUSG00000044465	Fam160a2	-0.443003	5.23309	57.2383	3.08132e-07	4.38543e-06
ENSMUSG00000022848	Dirc2	-0.575218	5.55633	57.2197	3.08876e-07	4.39232e-06
ENSMUSG00000020682	Mmp28	-1.22643	6.17462	57.6098	3.10756e-07	4.41164e-06
ENSMUSG00000051041	Olfml1	-1.13389	5.32152	57.3306	3.10657e-07	4.41164e-06
ENSMUSG00000039018	Mtg1	-0.736536	4.63087	57.0782	3.14601e-07	4.46247e-06
ENSMUSG00000001891	Ugp2	-0.813523	6.68957	57.0175	3.17093e-07	4.49406e-06
ENSMUSG00000017830	Dhx58	1.01088	3.83598	56.9949	3.18027e-07	4.50352e-06
ENSMUSG00000021222	Dcaf4	-0.475857	4.44716	56.9785	3.18703e-07	4.50932e-06
ENSMUSG00000052852	Reep1	-1.7677	3.31906	57.284	3.24041e-07	4.58101e-06
ENSMUSG00000049807	Arhgap23	-0.918052	7.01671	56.832	3.24842e-07	4.58849e-06
ENSMUSG00000037787	Apopt1	-0.878084	5.28629	56.797	3.2633e-07	4.60567e-06
ENSMUSG00000036395	Glb1l2	-1.65213	8.26446	57.3973	3.30386e-07	4.65902e-06
ENSMUSG00000030067	Foxp1	0.704785	5.60482	56.6556	3.32408e-07	4.67583e-06
ENSMUSG00000003134	Tbc1d8	1.10976	3.77315	56.6563	3.3238e-07	4.67583e-06
ENSMUSG00000005374	Tbl2	-0.58404	5.6595	56.6669	3.31919e-07	4.67583e-06
ENSMUSG00000022489	Pde1b	0.760884	5.09398	56.6323	3.33425e-07	4.68624e-06
ENSMUSG00000027339	Rassf2	1.70673	6.32414	57.3976	3.34205e-07	4.69331e-06
ENSMUSG00000039476	Prrx2	2.52704	2.01739	56.6062	3.34562e-07	4.69442e-06
ENSMUSG00000031971	Ccsap	1.58605	2.00379	56.5789	3.35758e-07	4.7073e-06
ENSMUSG00000027009	Itga4	1.73153	4.77035	57.286	3.3658e-07	4.71491e-06
ENSMUSG00000055737	Ghr	-1.3798	9.94972	56.5513	3.36973e-07	4.7165e-06
ENSMUSG00000069516	Lyz2	1.97622	10.5183	56.6583	3.38736e-07	4.73726e-06
ENSMUSG00000020573	Pik3cg	1.60292	4.31808	56.9883	3.41255e-07	4.76855e-06
ENSMUSG00000004558	Ndrg2	-2.09577	7.69325	57.2254	3.41657e-07	4.77022e-06
ENSMUSG00000050592	Fam78a	1.59996	2.95142	56.4327	3.4225e-07	4.77455e-06
ENSMUSG00000037852	Cpe	1.61056	6.40324	57.1375	3.43054e-07	4.78183e-06
ENSMUSG00000012443	Kif11	1.98613	3.32193	56.8565	3.43533e-07	4.78456e-06
ENSMUSG00000030766	Arhgap17	0.863145	6.17631	56.3611	3.45475e-07	4.79144e-06
ENSMUSG00000057098	Ebf1	-1.19272	6.69473	56.6601	3.44818e-07	4.79144e-06
ENSMUSG00000051235	Gen1	2.03357	1.03982	56.3572	3.45655e-07	4.79144e-06
ENSMUSG00000020437	Myo1g	1.82558	5.74211	57.1382	3.45498e-07	4.79144e-06
ENSMUSG00000060126	Tpt1	0.830531	10.0599	56.3589	3.45576e-07	4.79144e-06
ENSMUSG00000021969	Zdhhc20	0.792287	5.4732	56.3556	3.45727e-07	4.79144e-06
ENSMUSG00000019261	Map1s	0.640669	5.54835	56.3184	3.47416e-07	4.8109e-06
ENSMUSG00000019831	Wasf1	-1.4954	2.34872	56.2255	3.51684e-07	4.86601e-06
ENSMUSG00000020190	Mknk2	-1.17766	9.07499	56.2169	3.5208e-07	4.86751e-06
ENSMUSG00000003865	Gys1	-1.2327	6.68303	56.5819	3.52663e-07	4.87159e-06
ENSMUSG00000039599	Fam149b	-0.541765	5.39272	56.1756	3.53995e-07	4.886e-06
ENSMUSG00000017146	Brca1	2.63941	2.72435	56.6693	3.55628e-07	4.90454e-06
ENSMUSG00000029776	Hibadh	-1.10059	7.4916	56.0898	3.58015e-07	4.93343e-06
ENSMUSG00000040472	Rabggta	0.507152	4.47456	56.0761	3.58663e-07	4.93833e-06
ENSMUSG00000032826	Ank2	-0.849088	4.70461	56.047	3.6004e-07	4.95326e-06
ENSMUSG00000092060	Bend4	2.33039	2.6464	56.2925	3.60836e-07	4.96017e-06
ENSMUSG00000050471	Fam118b	0.835748	3.81438	56.0037	3.62102e-07	4.97353e-06
ENSMUSG00000027792	Bche	-2.20308	6.38294	57.0039	3.62615e-07	4.97654e-06
ENSMUSG00000023047	Amhr2	-2.86119	1.7742	56.2574	3.63416e-07	4.98349e-06
ENSMUSG00000020649	Rrm2	1.95087	3.56536	56.5615	3.64061e-07	4.98828e-06
ENSMUSG00000049288	Lix1l	-0.471373	6.30708	55.9358	3.65358e-07	5.002e-06
ENSMUSG00000026223	Itm2c	0.67462	7.62315	55.9247	3.65892e-07	5.00526e-06
ENSMUSG00000029673	Auts2	-0.885556	4.28491	55.8405	3.69985e-07	5.05715e-06
ENSMUSG00000000982	Ccl3	4.0789	1.94974	56.501	3.72399e-07	5.0821e-06
ENSMUSG00000039629	Strip2	-1.9849	2.47403	55.791	3.72411e-07	5.0821e-06
ENSMUSG00000043059	Zfp513	0.579866	4.62674	55.7365	3.75105e-07	5.11473e-06
ENSMUSG00000036545	Adamts2	0.595496	7.7145	55.6659	3.78626e-07	5.14263e-06
ENSMUSG00000040339	Fam102b	-0.737715	6.42702	55.6851	3.77668e-07	5.14263e-06
ENSMUSG00000021684	Pde8b	1.37271	1.41745	55.6659	3.78628e-07	5.14263e-06
ENSMUSG00000040855	Reps2	2.0192	4.28487	56.4401	3.7803e-07	5.14263e-06
ENSMUSG00000020390	Ube2b	-0.448544	6.5347	55.665	3.78671e-07	5.14263e-06
ENSMUSG00000021763	BC067074	-1.58989	3.34282	55.7284	3.82015e-07	5.18387e-06
ENSMUSG00000014776	Nol3	-1.53953	5.39687	56.3349	3.83219e-07	5.19604e-06
ENSMUSG00000000440	Pparg	-1.14103	7.4486	55.478	3.88177e-07	5.25695e-06
ENSMUSG00000027639	Samhd1	1.04205	7.42843	55.475	3.88333e-07	5.25695e-06
ENSMUSG00000001517	Foxm1	1.77694	3.42243	55.7651	3.89969e-07	5.27101e-06
ENSMUSG00000048772	Tmem53	-1.67014	3.06603	55.5154	3.89995e-07	5.27101e-06
ENSMUSG00000073758	Sh3d21	-1.65615	3.02785	55.4101	3.91693e-07	5.28974e-06
ENSMUSG00000051378	Kif18b	1.80013	1.90531	55.4016	3.92138e-07	5.29151e-06
ENSMUSG00000038236	Hoxa7	-1.34102	4.36424	55.7474	3.92672e-07	5.29449e-06
ENSMUSG00000042225	Ammecr1	1.12141	3.04483	55.3719	3.93688e-07	5.30397e-06
ENSMUSG00000018293	Pfn1	0.924815	9.18689	55.3471	3.94988e-07	5.31724e-06
ENSMUSG00000028048	Gba	0.686076	6.24987	55.3405	3.95336e-07	5.31769e-06
ENSMUSG00000070369	Itgad	4.61638	4.1875	56.5878	3.97392e-07	5.34109e-06
ENSMUSG00000027381	Bcl2l11	1.52226	4.44744	55.7237	4.00616e-07	5.38015e-06
ENSMUSG00000026421	Csrp1	-0.755347	7.63123	55.1929	4.03183e-07	5.41033e-06
ENSMUSG00000033416	Gucd1	-0.610948	5.46024	55.1817	4.03783e-07	5.41408e-06
ENSMUSG00000015222	Map2	2.1043	1.32764	55.1552	4.05216e-07	5.42899e-06
ENSMUSG00000055980	Irs1	-1.60657	4.90184	55.8924	4.05927e-07	5.43153e-06
ENSMUSG00000031004	Mki67	2.22797	5.257	55.9107	4.06369e-07	5.43153e-06
ENSMUSG00000067825	Pex26	-0.507584	3.9317	55.1393	4.06076e-07	5.43153e-06
ENSMUSG00000053398	Phgdh	-2.35234	8.13811	55.8609	4.07599e-07	5.44367e-06
ENSMUSG00000046186	Cd109	0.740428	3.79185	55.0712	4.09778e-07	5.45983e-06
ENSMUSG00000049775	Tmsb4x	1.28503	10.6138	55.0742	4.09617e-07	5.45983e-06
ENSMUSG00000033088	Triobp	-0.673094	5.86403	55.0819	4.09197e-07	5.45983e-06
ENSMUSG00000025271	Pfkfb1	-1.60369	5.10307	55.781	4.11878e-07	5.48349e-06
ENSMUSG00000028631	Kcnq4	-1.45576	4.36181	55.4485	4.17134e-07	5.5491e-06
ENSMUSG00000053279	Aldh1a1	-1.58471	7.76671	55.594	4.19126e-07	5.56684e-06
ENSMUSG00000032898	Fbxo21	-1.61479	6.81185	55.6518	4.18895e-07	5.56684e-06
ENSMUSG00000041650	Pcca	-1.13475	6.77637	54.9878	4.19716e-07	5.5703e-06
ENSMUSG00000020340	Cyfip2	2.14621	3.94493	55.586	4.22519e-07	5.58663e-06
ENSMUSG00000041625	Ggact	-0.851282	3.53112	54.8266	4.23404e-07	5.58663e-06
ENSMUSG00000058163	Gm5431	1.87462	2.39068	54.8463	4.22289e-07	5.58663e-06
ENSMUSG00000029387	Gtf2h3	-0.619526	4.0499	54.8354	4.22906e-07	5.58663e-06
ENSMUSG00000003779	Kif20a	1.76816	3.3799	55.0952	4.2359e-07	5.58663e-06
ENSMUSG00000051586	Mical3	-1.06656	6.60752	54.8329	4.23049e-07	5.58663e-06
ENSMUSG00000030726	Pold3	0.954754	4.64786	54.8581	4.21622e-07	5.58663e-06
ENSMUSG00000023993	Treml1	3.17572	0.760528	54.8289	4.23275e-07	5.58663e-06
ENSMUSG00000033361	Prrg3	-1.16009	6.11694	55.1404	4.23926e-07	5.5867e-06
ENSMUSG00000032309	Fbxo22	-0.817584	6.06386	54.7668	4.26811e-07	5.61598e-06
ENSMUSG00000028573	Fggy	-1.07646	5.12301	54.7908	4.26731e-07	5.61598e-06
ENSMUSG00000040669	Phc1	-0.608783	4.36207	54.7279	4.29045e-07	5.64097e-06
ENSMUSG00000039298	Cdk5rap2	0.991909	3.95455	54.7021	4.30529e-07	5.65609e-06
ENSMUSG00000002475	Abhd3	-1.28328	2.87109	54.6781	4.31918e-07	5.66993e-06
ENSMUSG00000062980	Cped1	-1.02768	6.43791	54.6373	4.34294e-07	5.6967e-06
ENSMUSG00000022221	Ripk3	1.37543	3.92341	54.6263	4.34935e-07	5.70068e-06
ENSMUSG00000059956	Serpinb12	3.59202	-0.260017	54.5764	4.37858e-07	5.73455e-06
ENSMUSG00000036330	Slc18a1	2.56472	1.25966	54.5123	4.4165e-07	5.77973e-06
ENSMUSG00000029661	Col1a2	1.35031	10.1617	54.5045	4.42117e-07	5.78137e-06
ENSMUSG00000022994	Adcy6	-0.889047	7.57762	54.4875	4.43129e-07	5.79013e-06
ENSMUSG00000047409	Ctdspl	-1.12798	6.81533	54.5577	4.44588e-07	5.80456e-06
ENSMUSG00000020257	Wdr82	0.486451	5.90629	54.4575	4.4492e-07	5.80456e-06
ENSMUSG00000001555	Fkbp10	1.02506	5.3887	54.4177	4.47312e-07	5.83126e-06
ENSMUSG00000023830	Igf2r	1.24689	7.36063	54.4901	4.48177e-07	5.83804e-06
ENSMUSG00000068740	Celsr2	-2.13399	3.17573	55.0575	4.49786e-07	5.85448e-06
ENSMUSG00000039715	Wdr34	-0.610279	3.55581	54.3475	4.51562e-07	5.87308e-06
ENSMUSG00000046179	E2f8	2.29858	2.06763	54.3359	4.52273e-07	5.8778e-06
ENSMUSG00000028458	Tesk1	0.563248	6.06326	54.3261	4.52869e-07	5.88104e-06
ENSMUSG00000031523	Dlc1	-1.06079	8.32906	54.3136	4.53635e-07	5.88646e-06
ENSMUSG00000037098	Rab11fip3	-0.583613	5.15154	54.3055	4.54126e-07	5.88831e-06
ENSMUSG00000046532	Ar	-1.47826	5.15415	54.9575	4.55768e-07	5.90507e-06
ENSMUSG00000079669	Gm17396	-1.7253	1.34365	54.2362	4.58393e-07	5.93455e-06
ENSMUSG00000021720	Rnf180	2.06857	2.26285	54.2167	4.59607e-07	5.94571e-06
ENSMUSG00000020592	Sdc1	1.54406	6.16731	54.8738	4.60844e-07	5.95715e-06
ENSMUSG00000044252	Osbpl1a	-1.02339	5.40177	54.1738	4.62274e-07	5.97107e-06
ENSMUSG00000035441	Myo1d	-0.819652	5.76351	54.0957	4.67183e-07	6.02988e-06
ENSMUSG00000026112	Coa5	-0.470067	7.19298	54.0821	4.68046e-07	6.0364e-06
ENSMUSG00000027962	Vcam1	1.25404	5.30968	54.4657	4.68614e-07	6.03911e-06
ENSMUSG00000039187	Fanci	2.281	1.27579	54.0454	4.70375e-07	6.05541e-06
ENSMUSG00000026510	Trp53bp2	-0.700872	4.67754	54.042	4.70594e-07	6.05541e-06
ENSMUSG00000040466	Blvrb	0.585701	5.79838	54.0042	4.73008e-07	6.08184e-06
ENSMUSG00000085316	D330050G23Rik	2.3013	-0.291079	53.9883	4.74025e-07	6.08566e-06
ENSMUSG00000016206	H2-M3	0.937712	4.07953	53.9907	4.73875e-07	6.08566e-06
ENSMUSG00000026043	Col3a1	1.50187	11.3141	53.9395	4.77171e-07	6.12141e-06
ENSMUSG00000026442	Nfasc	3.90609	2.46734	54.6545	4.7774e-07	6.12405e-06
ENSMUSG00000069806	Cacng7	-1.23592	4.92129	54.256	4.79522e-07	6.14225e-06
ENSMUSG00000090486	BC035947	-3.09556	2.00336	54.5121	4.83512e-07	6.18657e-06
ENSMUSG00000050107	Gsg2	1.89332	1.41084	53.8392	4.83715e-07	6.18657e-06
ENSMUSG00000028587	Orc1	2.19706	-0.11412	53.814	4.85373e-07	6.20309e-06
ENSMUSG00000041220	Elovl6	-1.67639	5.8999	54.5262	4.85954e-07	6.20582e-06
ENSMUSG00000035773	Kiss1r	-1.65223	2.01036	53.7937	4.86712e-07	6.21082e-06
ENSMUSG00000026807	Ak8	1.8052	1.50376	53.7543	4.89326e-07	6.23946e-06
ENSMUSG00000071723	Gspt2	-0.998205	2.35938	53.7407	4.90231e-07	6.24629e-06
ENSMUSG00000042129	Rassf4	1.76266	6.4672	54.448	4.91032e-07	6.25179e-06
ENSMUSG00000030162	Olr1	3.29025	1.62786	53.7918	4.93152e-07	6.27405e-06
ENSMUSG00000056486	Chn1	-1.45697	3.87479	53.9176	5.00207e-07	6.35902e-06
ENSMUSG00000051439	Cd14	1.87431	5.30411	54.2694	5.02856e-07	6.3879e-06
ENSMUSG00000005354	Txn2	-0.621485	6.97876	53.5444	5.03506e-07	6.39135e-06
ENSMUSG00000015094	Npdc1	-1.00547	6.8378	53.4946	5.06943e-07	6.43015e-06
ENSMUSG00000029633	Gm5578	-1.86699	1.47527	53.4839	5.07678e-07	6.43465e-06
ENSMUSG00000027411	Vps16	0.366781	5.64983	53.4663	5.089e-07	6.44531e-06
ENSMUSG00000025479	Cyp2e1	-5.59976	8.40306	54.6469	5.11365e-07	6.47168e-06
ENSMUSG00000024972	Lgals12	-1.90649	7.48754	54.1195	5.13029e-07	6.48788e-06
ENSMUSG00000061758	Akr1b10	0.545091	5.15268	53.375	5.15287e-07	6.5067e-06
ENSMUSG00000041552	Ptchd1	4.60333	1.1532	53.7908	5.15126e-07	6.5067e-06
ENSMUSG00000034349	Smc4	0.856124	5.36726	53.3695	5.15678e-07	6.50678e-06
ENSMUSG00000057789	Bak1	0.648137	5.64155	53.2905	5.21277e-07	6.57253e-06
ENSMUSG00000090145	Ugt1a6b	-2.12997	3.80783	53.9906	5.2195e-07	6.5761e-06
ENSMUSG00000046314	Stxbp6	-1.37732	3.61004	53.2495	5.24208e-07	6.59964e-06
ENSMUSG00000040147	Maob	-1.37039	5.50283	53.8899	5.25443e-07	6.61027e-06
ENSMUSG00000020493	Prr11	1.67165	2.36489	53.2115	5.26942e-07	6.62419e-06
ENSMUSG00000020150	Gamt	-1.05153	5.774	53.2727	5.2743e-07	6.6254e-06
ENSMUSG00000021991	Cacna2d3	-3.15969	-0.589513	53.1824	5.29046e-07	6.63584e-06
ENSMUSG00000026358	Rgs1	4.37297	5.42765	54.3582	5.31215e-07	6.65811e-06
ENSMUSG00000027351	Spred1	1.24982	6.01002	53.5106	5.35011e-07	6.70071e-06
ENSMUSG00000006782	Cnp	0.618076	5.08032	53.0889	5.3588e-07	6.70166e-06
ENSMUSG00000046215	Rprml	-3.36902	2.25126	53.7965	5.35719e-07	6.70166e-06
ENSMUSG00000026972	Arrdc1	0.682169	5.00949	53.0774	5.36724e-07	6.70727e-06
ENSMUSG00000041836	Ptpre	1.1576	5.41383	53.1988	5.41562e-07	6.76273e-06
ENSMUSG00000029153	Ociad2	1.46051	2.46693	53.0044	5.42129e-07	6.76481e-06
ENSMUSG00000027331	Knstrn	2.21483	3.05057	53.5066	5.43883e-07	6.77669e-06
ENSMUSG00000015880	Ncapg	2.47956	2.29037	53.0753	5.43594e-07	6.77669e-06
ENSMUSG00000035504	Reep6	-2.10872	6.01844	53.8673	5.44591e-07	6.78052e-06
ENSMUSG00000027968	Larp7	0.701408	4.65435	52.9422	5.46787e-07	6.80285e-06
ENSMUSG00000028518	Prkaa2	-1.1068	3.09365	52.9321	5.47541e-07	6.80722e-06
ENSMUSG00000022018	Rgcc	-1.54724	7.52207	53.5705	5.4851e-07	6.81426e-06
ENSMUSG00000032340	Neo1	-0.73409	5.19196	52.9012	5.49876e-07	6.82622e-06
ENSMUSG00000003500	Impdh1	-0.565665	6.42597	52.8572	5.53216e-07	6.86264e-06
ENSMUSG00000037337	Map4k1	1.29022	4.4991	52.987	5.53737e-07	6.86407e-06
ENSMUSG00000028693	Nasp	0.726956	4.41394	52.8164	5.56334e-07	6.88945e-06
ENSMUSG00000025969	Nrp2	1.27002	6.84735	53.1461	5.56599e-07	6.88945e-06
ENSMUSG00000085615	A330035P11Rik	-1.43681	1.60245	52.8002	5.57574e-07	6.89646e-06
ENSMUSG00000018654	Ikzf1	1.51142	4.71276	53.4306	5.58964e-07	6.90859e-06
ENSMUSG00000054115	Skp2	1.61058	2.35318	52.7651	5.60281e-07	6.91981e-06
ENSMUSG00000030087	Klf15	-2.27224	5.43564	53.9393	5.6155e-07	6.92537e-06
ENSMUSG00000039396	Neil3	1.90137	1.66597	52.7527	5.61238e-07	6.92537e-06
ENSMUSG00000059883	Irak4	0.887414	4.62902	52.7276	5.63184e-07	6.94046e-06
ENSMUSG00000030257	Srgap3	1.13351	2.46432	52.7152	5.64147e-07	6.94727e-06
ENSMUSG00000042489	Clspn	2.39639	2.3494	52.7972	5.64753e-07	6.94966e-06
ENSMUSG00000024818	Slc25a45	0.946988	4.87535	52.6883	5.66246e-07	6.96233e-06
ENSMUSG00000043085	Tmem82	2.00723	0.757431	52.6837	5.66605e-07	6.96233e-06
ENSMUSG00000027303	Ptpra	0.505019	7.39228	52.672	5.67517e-07	6.96847e-06
ENSMUSG00000022853	Ehhadh	-1.56525	5.54186	53.3269	5.70708e-07	6.99749e-06
ENSMUSG00000047123	Ticam1	0.75067	4.47914	52.6366	5.70303e-07	6.99749e-06
ENSMUSG00000029158	Yipf7	5.66258	-0.921197	52.6168	5.71864e-07	7.00658e-06
ENSMUSG00000032244	Fem1b	0.867498	5.24022	52.5289	5.78851e-07	7.08705e-06
ENSMUSG00000035764	Fbxo45	-1.12105	5.30951	52.7619	5.80489e-07	7.10195e-06
ENSMUSG00000030134	Rasgef1a	2.0798	1.6346	52.4779	5.8295e-07	7.12691e-06
ENSMUSG00000004043	Stat5a	-0.700085	5.89207	52.455	5.84801e-07	7.14437e-06
ENSMUSG00000040037	Negr1	-1.70629	4.26014	53.1112	5.85888e-07	7.14733e-06
ENSMUSG00000039844	Rapgef1	-0.630241	7.3007	52.4419	5.85865e-07	7.14733e-06
ENSMUSG00000005465	Il27ra	1.44063	3.54417	52.4204	5.87613e-07	7.1632e-06
ENSMUSG00000027514	Zbp1	1.37695	3.39717	52.383	5.90664e-07	7.19521e-06
ENSMUSG00000045100	Slc25a26	-0.900095	3.97058	52.3467	5.93644e-07	7.22311e-06
ENSMUSG00000020741	Cluh	-0.924848	8.12053	52.3196	5.95881e-07	7.23789e-06
ENSMUSG00000037544	Dlgap5	2.33478	2.35577	52.3849	5.95731e-07	7.23789e-06
ENSMUSG00000022337	Emc2	-0.777335	6.54522	52.3032	5.9724e-07	7.24261e-06
ENSMUSG00000029499	Pxmp2	-2.21964	4.59266	53.0976	5.97554e-07	7.24261e-06
ENSMUSG00000020289	Nprl3	-0.490717	4.7672	52.2776	5.99359e-07	7.25929e-06
ENSMUSG00000014791	Elmo3	-1.37404	4.23237	52.6282	6.03404e-07	7.30304e-06
ENSMUSG00000028399	Ptprd	-1.49395	4.71563	52.8287	6.06529e-07	7.33324e-06
ENSMUSG00000042331	Specc1	1.97372	5.11721	52.8752	6.06766e-07	7.33324e-06
ENSMUSG00000033307	Mif	0.674709	5.07369	52.1723	6.0819e-07	7.33996e-06
ENSMUSG00000025314	Ptprj	1.78112	5.54713	52.8631	6.0776e-07	7.33996e-06
ENSMUSG00000071103	1700029J07Rik	-1.44852	1.47978	52.1592	6.09302e-07	7.34313e-06
ENSMUSG00000053835	H2-T24	0.809034	2.93464	52.159	6.09321e-07	7.34313e-06
ENSMUSG00000027223	Mapk8ip1	-1.19112	4.2672	52.1637	6.10498e-07	7.35206e-06
ENSMUSG00000025237	Parp6	-0.557437	5.14728	52.0984	6.14479e-07	7.38949e-06
ENSMUSG00000023224	Serping1	0.908418	9.02329	52.1006	6.14288e-07	7.38949e-06
ENSMUSG00000078780	Gm5150	3.74724	2.03978	52.7247	6.15188e-07	7.39275e-06
ENSMUSG00000055782	Abcd2	-1.55277	8.75433	52.4804	6.15782e-07	7.39463e-06
ENSMUSG00000072704	2700089E24Rik	-0.913267	6.87462	51.9793	6.24751e-07	7.49702e-06
ENSMUSG00000029094	Afap1	-0.796412	6.01319	51.9649	6.26007e-07	7.50675e-06
ENSMUSG00000035208	Slfn8	1.4783	3.67168	51.9695	6.33214e-07	7.5878e-06
ENSMUSG00000047866	Lonp2	-0.971185	7.48123	51.8652	6.34779e-07	7.60116e-06
ENSMUSG00000035711	Dok3	1.74714	4.12368	52.3678	6.45968e-07	7.72421e-06
ENSMUSG00000006360	Crip1	1.09521	7.73299	51.7107	6.48631e-07	7.75057e-06
ENSMUSG00000050967	Creg2	4.17848	1.85005	52.3314	6.49204e-07	7.75194e-06
ENSMUSG00000028249	Sdcbp	1.2636	8.19793	51.6834	6.51113e-07	7.76925e-06
ENSMUSG00000022191	Drosha	-0.574214	5.74891	51.6567	6.53551e-07	7.79284e-06
ENSMUSG00000022199	Slc22a17	-0.824587	4.72152	51.6423	6.54873e-07	7.8031e-06
ENSMUSG00000013076	Amotl1	-0.798398	7.44756	51.5665	6.61869e-07	7.87535e-06
ENSMUSG00000054966	Ifltd1	-1.90903	2.44585	51.5683	6.61704e-07	7.87535e-06
ENSMUSG00000074973	Gm11382	4.90585	-1.58286	59.7834	6.68575e-07	7.94357e-06
ENSMUSG00000032254	Kif23	1.52196	3.30204	51.495	6.68541e-07	7.94357e-06
ENSMUSG00000026027	Stradb	-0.736573	5.31101	51.49	6.69011e-07	7.94357e-06
ENSMUSG00000051504	Siglech	-2.19383	1.05966	51.439	6.7382e-07	7.99505e-06
ENSMUSG00000053617	Sh3pxd2a	-1.16803	8.70248	51.4301	6.74662e-07	7.99942e-06
ENSMUSG00000031389	Arhgap4	1.56613	4.48495	52.0168	6.77905e-07	8.03225e-06
ENSMUSG00000043557	Mdga1	1.52007	1.62873	51.3783	6.79594e-07	8.04663e-06
ENSMUSG00000057069	Ero1lb	1.00336	3.85184	51.3525	6.82057e-07	8.07013e-06
ENSMUSG00000036327	Qsox2	-0.594921	4.56843	51.3115	6.86001e-07	8.11112e-06
ENSMUSG00000086784	Isoc2a	-1.22475	6.19358	51.709	6.90608e-07	8.15419e-06
ENSMUSG00000051890	Klhdc1	-1.13304	3.03956	51.1651	7.00305e-07	8.26291e-06
ENSMUSG00000063952	Brpf3	-0.667577	6.21227	51.0771	7.09056e-07	8.35481e-06
ENSMUSG00000019254	Ppp1r12c	0.476874	7.16554	51.0768	7.09082e-07	8.35481e-06
ENSMUSG00000022969	Il10rb	0.787883	6.02166	51.0384	7.12939e-07	8.39006e-06
ENSMUSG00000032783	Troap	2.79863	1.53136	51.0371	7.13066e-07	8.39006e-06
ENSMUSG00000045896	Paip2b	-0.950466	5.52158	51.0276	7.14027e-07	8.39552e-06
ENSMUSG00000018740	Slc25a35	-1.61107	4.69282	51.6767	7.1522e-07	8.40371e-06
ENSMUSG00000029687	Ezh2	0.840372	3.72274	51.0048	7.16327e-07	8.4092e-06
ENSMUSG00000022358	Fbxo32	0.794436	4.34106	50.9992	7.16903e-07	8.4092e-06
ENSMUSG00000033585	Ndn	-0.902034	5.03079	50.9964	7.17179e-07	8.4092e-06
ENSMUSG00000090150	Acad11	-1.22713	6.79401	51.3358	7.21648e-07	8.45574e-06
ENSMUSG00000039934	Gsap	1.57211	3.69136	51.2236	7.23231e-07	8.46735e-06
ENSMUSG00000021140	Pcnx	-0.524117	6.14669	50.933	7.23641e-07	8.46735e-06
ENSMUSG00000039253	Fn3krp	-0.909336	4.42383	50.9219	7.24781e-07	8.47146e-06
ENSMUSG00000020330	Hmmr	2.6098	2.48919	51.3027	7.24994e-07	8.47146e-06
ENSMUSG00000025154	Arhgap19	2.98408	4.87238	52.0288	7.26461e-07	8.47147e-06
ENSMUSG00000035342	Lzts2	-1.24304	6.65137	51.3278	7.26499e-07	8.47147e-06
ENSMUSG00000026039	Sgol2	1.55744	2.41027	50.9136	7.25633e-07	8.47147e-06
ENSMUSG00000030785	Cox6a2	2.75203	0.776525	50.8234	7.34967e-07	8.54664e-06
ENSMUSG00000034330	Plcg2	1.68689	4.6402	51.449	7.3474e-07	8.54664e-06
ENSMUSG00000027784	Ppm1l	-1.43238	3.6551	51.0112	7.3355e-07	8.54664e-06
ENSMUSG00000042842	Serpinb6b	1.67797	4.6336	51.4211	7.36174e-07	8.5548e-06
ENSMUSG00000028138	Adh5	-0.548632	6.59887	50.7899	7.38456e-07	8.56953e-06
ENSMUSG00000022466	Rpap3	-0.80043	4.76121	50.79	7.38448e-07	8.56953e-06
ENSMUSG00000024900	Cpt1a	0.832596	7.47873	50.7756	7.39958e-07	8.58107e-06
ENSMUSG00000027177	Hipk3	-0.792952	6.92899	50.767	7.4086e-07	8.5832e-06
ENSMUSG00000038252	Ncapd2	0.70845	5.0773	50.7642	7.41156e-07	8.5832e-06
ENSMUSG00000028565	Nfia	-0.91681	6.11681	50.744	7.43288e-07	8.60007e-06
ENSMUSG00000070034	Sp110	1.01942	4.76293	50.7407	7.4363e-07	8.60007e-06
ENSMUSG00000002781	Tmem143	-1.14128	5.22209	51.0423	7.44366e-07	8.6027e-06
ENSMUSG00000029438	Bcl7a	-0.927283	3.54069	50.6519	7.53073e-07	8.69182e-06
ENSMUSG00000045328	Cenpe	1.94684	2.81371	50.7324	7.53106e-07	8.69182e-06
ENSMUSG00000037405	Icam1	1.12911	5.3653	50.8068	7.54546e-07	8.7025e-06
ENSMUSG00000006784	Ttc25	-1.89006	0.981915	50.6316	7.55245e-07	8.70462e-06
ENSMUSG00000042606	Hirip3	0.713326	3.75941	50.6038	7.58236e-07	8.73314e-06
ENSMUSG00000021477	Ctsl	1.42045	10.4895	50.5929	7.59415e-07	8.73482e-06
ENSMUSG00000027601	Mtfr1	-0.561032	4.66358	50.5935	7.59345e-07	8.73482e-06
ENSMUSG00000026923	Notch1	-0.742816	6.54512	50.5683	7.6207e-07	8.7594e-06
ENSMUSG00000075289	Carns1	-0.994503	3.19589	50.5379	7.65379e-07	8.78895e-06
ENSMUSG00000034206	Polq	1.909	0.715348	50.5351	7.6568e-07	8.78895e-06
ENSMUSG00000082286	Pisd-ps1	1.28867	3.04416	50.4944	7.7013e-07	8.82803e-06
ENSMUSG00000041488	Stx3	0.90452	3.93494	50.4488	7.75143e-07	8.87949e-06
ENSMUSG00000079168	Cd209g	-1.35312	3.5858	50.4654	7.76422e-07	8.88811e-06
ENSMUSG00000022440	C1qtnf6	1.34449	5.21822	50.8932	7.81824e-07	8.93785e-06
ENSMUSG00000079419	Ms4a6c	2.31762	5.05426	51.2091	7.81351e-07	8.93785e-06
ENSMUSG00000060147	Serpinb6a	0.912002	8.28064	50.3541	7.85687e-07	8.97594e-06
ENSMUSG00000022231	Sema5a	-1.1187	4.5644	50.3451	7.916e-07	9.03207e-06
ENSMUSG00000020802	Ube2o	-0.62049	5.30863	50.301	7.91669e-07	9.03207e-06
ENSMUSG00000000693	Loxl3	1.15757	4.48263	50.2882	7.93109e-07	9.04241e-06
ENSMUSG00000044847	Lsm11	0.95114	3.12255	50.2581	7.9653e-07	9.07529e-06
ENSMUSG00000030532	Hddc3	-1.0336	2.88261	50.1891	8.04434e-07	9.15917e-06
ENSMUSG00000000340	Dbt	-1.26581	5.91459	50.7181	8.10007e-07	9.20963e-06
ENSMUSG00000040022	Rab11fip2	-0.683305	3.92819	50.1366	8.105e-07	9.20963e-06
ENSMUSG00000024590	Lmnb1	1.23195	4.10762	50.0812	8.16949e-07	9.27668e-06
ENSMUSG00000032965	Ift57	-0.837384	3.68161	50.0522	8.2035e-07	9.30904e-06
ENSMUSG00000037999	Arap2	-1.04533	3.95475	50.0473	8.20932e-07	9.3094e-06
ENSMUSG00000048277	Syngr2	0.811369	6.59454	50.024	8.23671e-07	9.3342e-06
ENSMUSG00000034194	R3hcc1	-0.801934	5.04625	50.0151	8.24729e-07	9.33993e-06
ENSMUSG00000036469	March1	1.88472	3.80746	50.5788	8.2822e-07	9.37319e-06
ENSMUSG00000036768	Kif15	2.14106	2.07382	49.956	8.31753e-07	9.39431e-06
ENSMUSG00000071203	Naip5	1.66739	3.91368	50.4588	8.30654e-07	9.39431e-06
ENSMUSG00000030788	Rnf141	-0.512021	6.23667	49.9575	8.31572e-07	9.39431e-06
ENSMUSG00000081189	Gm12725	-2.42565	3.95349	50.5714	8.4176e-07	9.50027e-06
ENSMUSG00000025816	Sec61a2	-0.616317	4.87928	49.8686	8.42258e-07	9.50027e-06
ENSMUSG00000062661	Ncs1	1.13735	3.13271	49.8613	8.43147e-07	9.50395e-06
ENSMUSG00000029759	Pon3	-0.646533	5.83654	49.7715	8.54109e-07	9.6211e-06
ENSMUSG00000037788	Vopp1	0.729974	4.71078	49.7623	8.55233e-07	9.62735e-06
ENSMUSG00000030753	Prkrir	-0.949504	6.35529	49.7537	8.5629e-07	9.63284e-06
ENSMUSG00000039763	Dnajc28	-0.783862	3.12826	49.7351	8.58594e-07	9.65088e-06
ENSMUSG00000029234	Tmem165	0.886848	6.33854	49.7315	8.59036e-07	9.65088e-06
ENSMUSG00000057342	Sphk2	0.73343	5.59717	49.6355	8.71e-07	9.77231e-06
ENSMUSG00000020644	Id2	1.42711	4.24406	49.9702	8.75045e-07	9.81118e-06
ENSMUSG00000025911	Adhfe1	-1.83775	7.20805	50.1954	8.79901e-07	9.8471e-06
ENSMUSG00000009681	Bcr	-0.622233	5.55107	49.5678	8.79555e-07	9.8471e-06
ENSMUSG00000000682	Cd52	2.06824	5.82108	50.256	8.79995e-07	9.8471e-06
ENSMUSG00000027544	Nfatc2	1.46551	4.57574	50.0339	8.8396e-07	9.88492e-06
ENSMUSG00000035722	Abca7	0.573673	5.46797	49.5236	8.85183e-07	9.89205e-06
ENSMUSG00000046295	Ankle1	2.23081	1.8721	49.4615	8.93167e-07	9.97469e-06
ENSMUSG00000022389	Tef	-0.975966	7.54617	49.4562	8.93846e-07	9.97568e-06
ENSMUSG00000032890	Rims3	1.98318	1.22806	49.4053	9.00455e-07	1.00362e-05
ENSMUSG00000046324	Ermp1	-0.945875	7.54386	49.3804	9.03712e-07	1.00659e-05
ENSMUSG00000056130	Ticam2	1.70921	2.58293	49.3699	9.0508e-07	1.00744e-05
ENSMUSG00000023087	Ccrn4l	1.09118	5.95842	49.3598	9.17022e-07	1.0194e-05
ENSMUSG00000008683	Rps15a	0.711108	7.7114	49.2814	9.16766e-07	1.0194e-05
ENSMUSG00000034111	Tmed8	-0.511074	4.38878	49.2633	9.19165e-07	1.02111e-05
ENSMUSG00000074466	Gm15417	-1.50036	3.4762	49.4818	9.21568e-07	1.0231e-05
ENSMUSG00000028785	Hpca	3.5689	2.10804	49.7796	9.27439e-07	1.02895e-05
ENSMUSG00000026203	Dnajb2	-0.877157	5.43189	49.1817	9.30115e-07	1.02989e-05
ENSMUSG00000087638	Gm11773	-4.25644	-1.2336	49.1848	9.29701e-07	1.02989e-05
ENSMUSG00000021054	Sgpp1	0.928939	5.39737	49.183	9.29944e-07	1.02989e-05
ENSMUSG00000040430	Pitpnc1	1.39229	5.46013	49.7352	9.33324e-07	1.03276e-05
ENSMUSG00000028088	Fmo5	-1.13221	5.39572	49.4851	9.35268e-07	1.03424e-05
ENSMUSG00000030516	Tjp1	-0.788602	6.55718	49.1123	9.39535e-07	1.03828e-05
ENSMUSG00000074771	Ankef1	-1.82626	6.69075	49.7202	9.41283e-07	1.03953e-05
ENSMUSG00000002279	Lmf1	-0.475305	4.65452	49.0091	9.53748e-07	1.05192e-05
ENSMUSG00000057135	Scimp	1.63928	0.574309	49.0111	9.53469e-07	1.05192e-05
ENSMUSG00000039145	Camk1d	1.62894	4.45931	49.5573	9.57313e-07	1.05517e-05
ENSMUSG00000029816	Gpnmb	5.09585	10.3441	50.0274	9.5872e-07	1.05603e-05
ENSMUSG00000064065	Ipcef1	2.68565	1.44031	48.9672	9.5959e-07	1.0563e-05
ENSMUSG00000027496	Aurka	1.58473	2.58954	48.9407	9.63301e-07	1.05969e-05
ENSMUSG00000061589	Dot1l	0.911201	6.72062	48.9348	9.64127e-07	1.05991e-05
ENSMUSG00000035459	Stab2	2.71116	3.15604	49.5347	9.66521e-07	1.06185e-05
ENSMUSG00000038481	Cdk19	0.755826	5.04499	48.9081	9.67889e-07	1.06267e-05
ENSMUSG00000031667	Aktip	-0.572262	5.73554	48.897	9.69451e-07	1.06369e-05
ENSMUSG00000025473	Adam8	4.07407	7.86781	49.9376	9.70914e-07	1.06461e-05
ENSMUSG00000037580	Gch1	0.955761	3.1104	48.8674	9.73646e-07	1.06565e-05
ENSMUSG00000021144	Mta1	-0.456922	5.79623	48.8666	9.73759e-07	1.06565e-05
ENSMUSG00000030806	Stx1b	-1.36234	4.44874	49.2927	9.76014e-07	1.06687e-05
ENSMUSG00000047045	Tmem164	1.34689	5.78206	49.4211	9.76136e-07	1.06687e-05
ENSMUSG00000071252	2210408I21Rik	-0.934194	2.58889	48.839	9.77685e-07	1.06763e-05
ENSMUSG00000006019	Dhx34	0.58855	4.73891	48.8269	9.79414e-07	1.06763e-05
ENSMUSG00000028017	Egf	-1.2297	1.19219	48.8225	9.80047e-07	1.06763e-05
ENSMUSG00000023015	Racgap1	1.32529	4.24846	49.0473	9.78653e-07	1.06763e-05
ENSMUSG00000037563	Rps16	0.662079	7.7079	48.8141	9.8125e-07	1.06763e-05
ENSMUSG00000025939	Ube2w	-0.770008	6.18106	48.8303	9.78934e-07	1.06763e-05
ENSMUSG00000050732	Vamp8	0.7027	6.2604	48.8155	9.81049e-07	1.06763e-05
ENSMUSG00000000346	Dazap2	0.507515	7.91001	48.7971	9.83691e-07	1.0696e-05
ENSMUSG00000030189	Ybx3	-0.761755	7.25248	48.7903	9.84671e-07	1.06997e-05
ENSMUSG00000069662	Marcks	0.746139	7.54573	48.7739	9.87032e-07	1.07185e-05
ENSMUSG00000040687	Madd	1.18209	5.05832	49.0222	9.87884e-07	1.07209e-05
ENSMUSG00000058446	Znrf2	-0.548154	6.88369	48.7375	9.92297e-07	1.07619e-05
ENSMUSG00000020097	Sgpl1	1.03421	7.72366	48.7291	9.93512e-07	1.07681e-05
ENSMUSG00000049119	Fam110b	1.33576	2.32745	48.697	9.98188e-07	1.08119e-05
ENSMUSG00000029616	Erp29	0.686463	7.26452	48.6818	1.0004e-06	1.08289e-05
ENSMUSG00000041319	Thoc6	0.619822	4.08084	48.6747	1.00145e-06	1.08333e-05
ENSMUSG00000013622	Atraid	-0.70401	6.66373	48.6464	1.0056e-06	1.08643e-05
ENSMUSG00000027618	Nfs1	-0.721284	5.63245	48.6506	1.00498e-06	1.08643e-05
ENSMUSG00000074264	Amy1	-2.39564	7.47488	49.6668	1.00874e-06	1.08913e-05
ENSMUSG00000026986	Hnmt	-1.05152	4.59368	48.5992	1.01258e-06	1.09258e-05
ENSMUSG00000022548	Apod	1.50523	3.99436	48.9407	1.01451e-06	1.09396e-05
ENSMUSG00000078773	Rad54b	2.0833	0.571513	48.5782	1.01569e-06	1.09454e-05
ENSMUSG00000027018	Hat1	0.704987	4.36696	48.5611	1.01824e-06	1.09658e-05
ENSMUSG00000037370	Enpp1	2.23383	3.35227	49.1098	1.02263e-06	1.10061e-05
ENSMUSG00000035199	Arl6ip5	0.503621	6.87112	48.5117	1.02564e-06	1.10315e-05
ENSMUSG00000027208	Fgf7	2.11656	2.17375	48.4908	1.0288e-06	1.10584e-05
ENSMUSG00000079671	2610203C22Rik	1.66447	2.7105	48.4825	1.03004e-06	1.10648e-05
ENSMUSG00000012396	Nanog	-2.40506	-0.884592	48.4542	1.03433e-06	1.11038e-05
ENSMUSG00000079499	6530402F18Rik	-0.847536	3.87064	48.4301	1.038e-06	1.11361e-05
ENSMUSG00000043832	Clec4a3	1.7465	4.94669	48.9949	1.04429e-06	1.11965e-05
ENSMUSG00000017167	Cntnap1	-1.05875	3.47888	48.3615	1.04851e-06	1.12346e-05
ENSMUSG00000027367	Stard7	-0.498854	6.20449	48.3511	1.05011e-06	1.12446e-05
ENSMUSG00000060568	Fam78b	0.842021	3.97553	48.3125	1.05609e-06	1.12872e-05
ENSMUSG00000043008	Klhl6	1.03731	3.40739	48.3131	1.05601e-06	1.12872e-05
ENSMUSG00000030744	Rps3	0.58222	8.59629	48.3178	1.05527e-06	1.12872e-05
ENSMUSG00000024143	Rhoq	-0.905173	7.48876	48.3043	1.05736e-06	1.12937e-05
ENSMUSG00000030742	Lat	1.77208	1.84637	48.287	1.06006e-06	1.13153e-05
ENSMUSG00000029869	Ephb6	-1.46143	3.80812	48.621	1.06269e-06	1.13362e-05
ENSMUSG00000019122	Ccl9	2.2726	8.09846	48.8583	1.06506e-06	1.13472e-05
ENSMUSG00000003206	Ebi3	1.56414	2.28256	48.2552	1.06503e-06	1.13472e-05
ENSMUSG00000033590	Myo5c	-2.74369	0.233035	48.2412	1.06724e-06	1.13632e-05
ENSMUSG00000020733	Slc9a3r1	1.07352	5.34583	48.3053	1.06936e-06	1.13786e-05
ENSMUSG00000032383	Ppib	0.47501	7.56001	48.2218	1.07028e-06	1.13814e-05
ENSMUSG00000021557	Agtpbp1	-0.491401	5.48211	48.2	1.07373e-06	1.14105e-05
ENSMUSG00000067203	H2-K2	0.824056	3.38021	48.1959	1.07437e-06	1.14105e-05
ENSMUSG00000023921	Mut	-1.21518	6.67609	48.582	1.0753e-06	1.14132e-05
ENSMUSG00000002325	Irf9	0.670139	5.15823	48.1854	1.07604e-06	1.14138e-05
ENSMUSG00000071226	Cecr2	-1.13296	2.9643	48.181	1.07674e-06	1.14141e-05
ENSMUSG00000052087	Rgs14	1.48142	3.1204	48.1652	1.07926e-06	1.14336e-05
ENSMUSG00000043088	Il17re	-2.21492	3.11457	48.7389	1.08357e-06	1.14721e-05
ENSMUSG00000030255	Sspn	-1.05789	6.34488	48.2971	1.08866e-06	1.15188e-05
ENSMUSG00000032300	1700017B05Rik	0.631593	5.20894	48.08	1.0929e-06	1.15564e-05
ENSMUSG00000087445	Gm14286	-1.55167	2.12583	48.0663	1.09511e-06	1.15655e-05
ENSMUSG00000002550	Uck1	-0.97901	6.43087	48.0662	1.09513e-06	1.15655e-05
ENSMUSG00000031403	Dkc1	-0.501366	4.60624	48.0481	1.09806e-06	1.15892e-05
ENSMUSG00000086712	AI427809	2.02885	2.0885	48.0336	1.10042e-06	1.16069e-05
ENSMUSG00000087107	AI662270	1.88599	2.95553	48.2322	1.10354e-06	1.16326e-05
ENSMUSG00000029752	Asns	-1.34367	5.11533	48.555	1.10588e-06	1.165e-05
ENSMUSG00000034105	Tldc1	0.712581	3.49696	47.9929	1.10706e-06	1.16551e-05
ENSMUSG00000038425	Poli	-0.711438	2.99415	47.9659	1.11148e-06	1.16944e-05
ENSMUSG00000010721	Lmbr1	-0.475972	4.32907	47.9564	1.11303e-06	1.16962e-05
ENSMUSG00000032067	Pts	-0.678031	5.31038	47.9597	1.11249e-06	1.16962e-05
ENSMUSG00000024948	Map4k2	-0.697911	5.76589	47.9465	1.11467e-06	1.17061e-05
ENSMUSG00000047617	BC029214	-0.865434	4.21479	47.9413	1.11554e-06	1.17079e-05
ENSMUSG00000025510	Cd151	-0.851374	8.76962	47.9241	1.11838e-06	1.17305e-05
ENSMUSG00000038352	Arl5c	1.4696	2.19961	47.8745	1.12661e-06	1.17948e-05
ENSMUSG00000019302	Atp6v0a1	0.864766	8.95161	47.8751	1.12652e-06	1.17948e-05
ENSMUSG00000028864	Hgf	1.54566	2.60849	47.8752	1.12649e-06	1.17948e-05
ENSMUSG00000024424	Ttc39c	-0.638318	4.46985	47.8693	1.12747e-06	1.17966e-05
ENSMUSG00000021273	Fdft1	-1.14719	5.69303	48.147	1.1388e-06	1.1905e-05
ENSMUSG00000073702	Rpl31	0.65356	7.74136	47.7951	1.13995e-06	1.1905e-05
ENSMUSG00000049672	Zbtb14	-0.593333	4.68216	47.7967	1.13967e-06	1.1905e-05
ENSMUSG00000056211	R3hdm1	0.596291	5.84703	47.7729	1.1437e-06	1.19294e-05
ENSMUSG00000040511	Pvr	-0.779185	5.35169	47.7588	1.14609e-06	1.19471e-05
ENSMUSG00000040084	Bub1b	1.51074	3.58629	47.9417	1.14705e-06	1.19497e-05
ENSMUSG00000037315	Phf16	-1.03769	3.26888	47.7346	1.15022e-06	1.19746e-05
ENSMUSG00000046402	Rbp1	1.14769	4.23457	47.7308	1.15086e-06	1.19746e-05
ENSMUSG00000000154	Slc22a18	-1.24272	2.7719	47.7156	1.15347e-06	1.19944e-05
ENSMUSG00000041762	Gpr155	0.731717	4.58011	47.7039	1.15547e-06	1.20078e-05
ENSMUSG00000022257	Laptm4b	-1.26917	6.7177	48.1828	1.1578e-06	1.20102e-05
ENSMUSG00000020184	Mdm2	0.59077	5.95041	47.6901	1.15784e-06	1.20102e-05
ENSMUSG00000059493	Nhs	2.34477	1.22693	47.6941	1.15715e-06	1.20102e-05
ENSMUSG00000034612	Chst11	0.925407	5.45194	47.6684	1.16158e-06	1.20417e-05
ENSMUSG00000049191	Rgag4	0.855935	3.60031	47.654	1.16407e-06	1.20601e-05
ENSMUSG00000073412	Lst1	1.98424	2.90909	47.8995	1.17114e-06	1.21259e-05
ENSMUSG00000024962	Vegfb	-1.36174	6.38837	48.1549	1.17216e-06	1.21291e-05
ENSMUSG00000041841	Rpl37	0.606402	7.21817	47.5995	1.17354e-06	1.21359e-05
ENSMUSG00000027995	Tlr2	1.56681	4.16607	48.1189	1.17434e-06	1.21367e-05
ENSMUSG00000030036	Mogs	0.634792	4.97565	47.5626	1.18e-06	1.21878e-05
ENSMUSG00000029819	Npy	4.17689	0.278397	47.5528	1.18171e-06	1.2198e-05
ENSMUSG00000001211	Agpat3	-0.544204	7.67046	47.4782	1.19492e-06	1.22788e-05
ENSMUSG00000002835	Chaf1a	1.06085	3.65633	47.4876	1.19324e-06	1.22788e-05
ENSMUSG00000045594	Glb1	0.749476	6.1819	47.4909	1.19266e-06	1.22788e-05
ENSMUSG00000085207	Gm11767	-1.86503	0.0362762	47.4829	1.19408e-06	1.22788e-05
ENSMUSG00000042570	Mier2	0.508301	4.77323	47.4864	1.19345e-06	1.22788e-05
ENSMUSG00000028923	Necap2	0.684182	6.6568	47.495	1.19193e-06	1.22788e-05
ENSMUSG00000046223	Plaur	1.36606	4.49293	47.823	1.19431e-06	1.22788e-05
ENSMUSG00000097328	Tnfsf12	1.55001	4.6322	48.0208	1.19534e-06	1.22788e-05
ENSMUSG00000048327	Ckap2l	2.13544	2.77918	47.7784	1.19887e-06	1.23076e-05
ENSMUSG00000042228	Lyn	0.931257	6.18209	47.4251	1.2044e-06	1.23568e-05
ENSMUSG00000030281	Il17rc	-0.998319	4.64683	47.3516	1.21769e-06	1.24822e-05
ENSMUSG00000025509	Pnpla2	-1.5553	10.6819	47.3493	1.2181e-06	1.24822e-05
ENSMUSG00000042379	Esm1	-2.05579	1.86876	47.3177	1.22386e-06	1.25321e-05
ENSMUSG00000037003	Tenc1	-1.19747	8.29996	47.3188	1.22445e-06	1.25321e-05
ENSMUSG00000091575	2010016I18Rik	-3.96732	3.60457	48.3019	1.22593e-06	1.25397e-05
ENSMUSG00000056054	S100a8	2.52227	3.98394	47.8828	1.22725e-06	1.25456e-05
ENSMUSG00000020261	Slc36a1	0.886136	5.76018	47.2906	1.22882e-06	1.25541e-05
ENSMUSG00000022656	Pvrl3	1.03898	3.68766	47.2744	1.23181e-06	1.25769e-05
ENSMUSG00000001763	Tspan33	1.59547	2.86427	47.2575	1.23492e-06	1.26011e-05
ENSMUSG00000043154	Ppp2r3a	-0.678814	4.23864	47.2381	1.2385e-06	1.26224e-05
ENSMUSG00000058672	Tubb2a	1.08388	6.85458	47.28	1.23801e-06	1.26224e-05
ENSMUSG00000034557	Zfyve9	-0.552911	4.68224	47.2094	1.24384e-06	1.26692e-05
ENSMUSG00000019214	Chtf18	1.20083	2.30149	47.192	1.24708e-06	1.26932e-05
ENSMUSG00000028359	Orm3	-5.22479	4.10222	48.1759	1.24845e-06	1.26932e-05
ENSMUSG00000021403	Serpinb9b	3.96852	2.26864	47.7689	1.24791e-06	1.26932e-05
ENSMUSG00000031898	Dpep3	2.64553	0.786107	47.1281	1.25906e-06	1.27933e-05
ENSMUSG00000024677	Ms4a6b	1.86801	4.50565	47.6601	1.26801e-06	1.28766e-05
ENSMUSG00000042500	Ago4	0.925921	3.64219	47.0639	1.27122e-06	1.29015e-05
ENSMUSG00000045672	Col27a1	1.40138	3.71155	47.1317	1.27252e-06	1.29069e-05
ENSMUSG00000056069	Fam105a	1.61501	4.62215	47.5864	1.27399e-06	1.2914e-05
ENSMUSG00000090272	Mndal	0.83997	5.51425	47.0367	1.27643e-06	1.2931e-05
ENSMUSG00000017781	Pitpna	0.657841	7.55414	46.9738	1.28853e-06	1.30458e-05
ENSMUSG00000048922	Cdca2	2.16634	1.76915	46.9662	1.28999e-06	1.30528e-05
ENSMUSG00000046798	Cldn12	-0.782409	4.15458	46.9449	1.29413e-06	1.30868e-05
ENSMUSG00000029456	Acad10	-0.845169	3.65998	46.9354	1.29598e-06	1.30899e-05
ENSMUSG00000095115	Itpripl2	0.817727	6.65879	46.9373	1.2956e-06	1.30899e-05
ENSMUSG00000032387	Rbpms2	-1.63047	5.17081	47.4967	1.29884e-06	1.31109e-05
ENSMUSG00000068742	Cry2	-1.12746	6.65874	47.1805	1.30311e-06	1.31384e-05
ENSMUSG00000030513	Pcsk6	-1.69825	6.03352	47.4755	1.30291e-06	1.31384e-05
ENSMUSG00000074671	Tspyl3	1.04039	2.45921	46.8941	1.30404e-06	1.31399e-05
ENSMUSG00000048120	Entpd1	1.01916	5.83705	46.8839	1.31095e-06	1.32016e-05
ENSMUSG00000038884	A230050P20Rik	0.859663	4.81127	46.8542	1.31189e-06	1.32033e-05
ENSMUSG00000028024	Enpep	-2.05365	7.70666	47.3984	1.31781e-06	1.3247e-05
ENSMUSG00000025318	Jph3	-2.76585	-0.651765	46.8273	1.31721e-06	1.3247e-05
ENSMUSG00000059796	Eif4a1	0.650925	8.72855	46.8099	1.32067e-06	1.32521e-05
ENSMUSG00000075705	Msrb1	-0.684978	6.92799	46.8158	1.31949e-06	1.32521e-05
ENSMUSG00000016946	Kctd5	0.459718	4.4754	46.79	1.32463e-06	1.3284e-05
ENSMUSG00000008226	Scrn3	-0.588515	4.8748	46.7803	1.32656e-06	1.32955e-05
ENSMUSG00000011256	Adam19	1.25393	5.45275	47.1471	1.33376e-06	1.33518e-05
ENSMUSG00000030282	Cmas	0.548931	5.29437	46.7449	1.33366e-06	1.33518e-05
ENSMUSG00000030657	Xylt1	1.69384	4.13124	47.2471	1.3394e-06	1.34003e-05
ENSMUSG00000020634	Ubxn2a	-0.714657	4.92644	46.6964	1.34345e-06	1.34329e-05
ENSMUSG00000029851	Fam115c	-0.844407	4.29166	46.6624	1.35035e-06	1.34939e-05
ENSMUSG00000024158	Hagh	-0.820884	5.80282	46.6566	1.35152e-06	1.34976e-05
ENSMUSG00000032375	Aph1b	-0.827083	3.96508	46.6421	1.35449e-06	1.35193e-05
ENSMUSG00000056124	B4galt6	1.65027	5.73759	47.1902	1.35897e-06	1.3556e-05
ENSMUSG00000004105	Angptl2	-1.09827	7.72363	46.5947	1.36422e-06	1.36004e-05
ENSMUSG00000012428	Steap4	-1.60318	8.67509	47.0963	1.36966e-06	1.36465e-05
ENSMUSG00000021866	Anxa11	0.41804	5.49314	46.5342	1.37674e-06	1.37091e-05
ENSMUSG00000027075	Slc43a1	-1.8745	4.51965	47.0941	1.37843e-06	1.37177e-05
ENSMUSG00000030301	Ccdc91	-0.682815	5.46785	46.4769	1.38873e-06	1.38048e-05
ENSMUSG00000058290	Espl1	1.51782	2.98797	46.4765	1.3888e-06	1.38048e-05
ENSMUSG00000034595	Ppp1r18	0.560506	6.88402	46.4097	1.40292e-06	1.39287e-05
ENSMUSG00000041431	Ccnb1	1.85703	2.74134	46.4075	1.40664e-06	1.39575e-05
ENSMUSG00000060739	Nsa2	0.56441	5.76861	46.3172	1.42272e-06	1.41004e-05
ENSMUSG00000048550	Thnsl1	-0.812216	2.98438	46.3194	1.42225e-06	1.41004e-05
ENSMUSG00000025656	Arhgef9	-0.834819	3.23091	46.3077	1.42476e-06	1.41124e-05
ENSMUSG00000028718	Stil	2.04064	1.5703	46.3032	1.42575e-06	1.4114e-05
ENSMUSG00000005732	Ranbp1	0.479522	5.48359	46.2978	1.42691e-06	1.41171e-05
ENSMUSG00000092203	1110038B12Rik	0.663768	3.92254	46.276	1.43164e-06	1.41557e-05
ENSMUSG00000035476	Tab3	-1.0034	4.4626	46.2652	1.43399e-06	1.4163e-05
ENSMUSG00000022634	Yaf2	-0.656086	4.70052	46.2649	1.43406e-06	1.4163e-05
ENSMUSG00000025268	Maged2	0.663103	5.58509	46.2538	1.43647e-06	1.41785e-05
ENSMUSG00000072494	Ppp1r3e	-1.04146	3.92897	46.2492	1.43749e-06	1.41803e-05
ENSMUSG00000004460	Dnajb11	0.53815	6.31948	46.2322	1.44119e-06	1.4192e-05
ENSMUSG00000053687	Dpep2	2.88868	1.42039	46.2327	1.44109e-06	1.4192e-05
ENSMUSG00000022800	Fyttd1	-0.47002	5.64731	46.2386	1.4398e-06	1.4192e-05
ENSMUSG00000045709	1700023L04Rik	-2.20961	1.34772	46.2153	1.44489e-06	1.42202e-05
ENSMUSG00000026158	Ogfrl1	0.748444	3.63923	46.1591	1.4573e-06	1.43256e-05
ENSMUSG00000028369	Svep1	1.22891	7.08869	46.4493	1.45668e-06	1.43256e-05
ENSMUSG00000019539	Rcn3	1.05158	6.33668	46.2248	1.45872e-06	1.43312e-05
ENSMUSG00000005447	Pafah1b3	1.59843	2.73807	46.1363	1.46235e-06	1.43585e-05
ENSMUSG00000086109	Gm13391	3.95033	0.00930214	46.1322	1.46326e-06	1.43592e-05
ENSMUSG00000062867	Impdh2	0.460312	5.61114	46.1209	1.46578e-06	1.43756e-05
ENSMUSG00000059901	Adamts14	1.54583	3.76739	46.4162	1.47243e-06	1.4424e-05
ENSMUSG00000029322	Plac8	2.56077	2.98688	46.6536	1.47173e-06	1.4424e-05
ENSMUSG00000033033	Calhm2	0.985268	3.53774	46.0807	1.47476e-06	1.44321e-05
ENSMUSG00000034308	Sdr42e1	-0.974573	4.10349	46.0799	1.47496e-06	1.44321e-05
ENSMUSG00000097462	9530026P05Rik	-1.67763	1.52066	46.0759	1.47584e-06	1.44323e-05
ENSMUSG00000021209	Ppp4r4	-1.63114	1.89847	46.0712	1.47691e-06	1.44345e-05
ENSMUSG00000035041	Creb3l3	3.10259	1.01087	46.0672	1.4778e-06	1.44348e-05
ENSMUSG00000089682	Bcl2l2	-0.731102	6.54029	46.0507	1.48153e-06	1.44629e-05
ENSMUSG00000021508	Cxcl14	2.14015	4.20848	46.5991	1.48376e-06	1.4468e-05
ENSMUSG00000024645	Timm21	-0.736151	3.99287	46.0214	1.48815e-06	1.45024e-05
ENSMUSG00000030935	Acsm3	-3.8701	1.86446	46.5707	1.49007e-06	1.45044e-05
ENSMUSG00000049625	Tifab	1.71774	4.75963	46.5713	1.48993e-06	1.45044e-05
ENSMUSG00000050394	Armcx6	1.19717	1.39888	46.0022	1.49251e-06	1.4514e-05
ENSMUSG00000021136	Smoc1	-1.94643	7.52266	46.5585	1.49277e-06	1.4514e-05
ENSMUSG00000042705	Commd10	0.431876	4.99298	45.9879	1.49578e-06	1.45348e-05
ENSMUSG00000097572	Gm26797	-1.40362	2.3103	45.9612	1.50187e-06	1.45856e-05
ENSMUSG00000037993	Dhx38	0.428235	5.68796	45.905	1.5148e-06	1.47028e-05
ENSMUSG00000024968	Rcor2	-1.76881	3.85401	46.4316	1.52138e-06	1.47581e-05
ENSMUSG00000028085	Pet112	-1.00271	4.67313	45.8692	1.52311e-06	1.47664e-05
ENSMUSG00000021156	Zmynd11	-0.391669	6.64466	45.8514	1.52725e-06	1.47981e-05
ENSMUSG00000039178	Tbc1d19	-0.598069	4.46398	45.7962	1.5402e-06	1.49151e-05
ENSMUSG00000024780	Cdc37l1	-0.401277	5.43136	45.792	1.54118e-06	1.49161e-05
ENSMUSG00000025871	4833439L19Rik	-0.549661	6.87758	45.7164	1.55911e-06	1.50723e-05
ENSMUSG00000097885	5031434O11Rik	-1.27475	2.30325	45.6992	1.56323e-06	1.51035e-05
ENSMUSG00000029377	Ereg	4.4541	-1.03101	45.6794	1.56797e-06	1.5132e-05
ENSMUSG00000008090	Fgfrl1	-1.4343	8.00788	46.1692	1.56749e-06	1.5132e-05
ENSMUSG00000000934	Top1mt	-0.738954	3.60822	45.6528	1.57436e-06	1.5185e-05
ENSMUSG00000051457	Spn	1.481	3.62053	45.8228	1.58192e-06	1.52492e-05
ENSMUSG00000029833	Trim24	-0.690382	5.63393	45.6078	1.58527e-06	1.52728e-05
ENSMUSG00000051107	Gm15440	2.97273	-0.165393	45.5998	1.58722e-06	1.52829e-05
ENSMUSG00000021411	Pxdc1	-1.30058	5.17561	46.0748	1.59559e-06	1.53547e-05
ENSMUSG00000031596	Slc7a2	1.57117	2.94195	45.5593	1.59712e-06	1.53607e-05
ENSMUSG00000000876	Pxmp4	-0.901624	6.46529	45.5535	1.59852e-06	1.53655e-05
ENSMUSG00000026554	Dcaf8	-0.469192	7.36018	45.5458	1.60042e-06	1.53749e-05
ENSMUSG00000013997	Nit1	-0.632332	5.49546	45.5301	1.60428e-06	1.54033e-05
ENSMUSG00000037148	Arhgap10	1.14129	5.38262	45.8057	1.6105e-06	1.54542e-05
ENSMUSG00000034773	BC030867	2.00678	1.20824	45.4838	1.61573e-06	1.54869e-05
ENSMUSG00000020460	Rps27a	0.786202	8.16012	45.438	1.62715e-06	1.55874e-05
ENSMUSG00000033952	Aspm	2.09976	2.12386	45.4343	1.62808e-06	1.55875e-05
ENSMUSG00000022303	Dcstamp	3.24058	2.38074	45.8621	1.65741e-06	1.58504e-05
ENSMUSG00000035863	Palm	-1.12432	7.14797	45.5163	1.66433e-06	1.59075e-05
ENSMUSG00000058147	Xlr3c	-3.88236	-1.39033	45.2142	1.68422e-06	1.60886e-05
ENSMUSG00000086742	Gm16201	1.3389	1.20724	45.201	1.68764e-06	1.61122e-05
ENSMUSG00000022940	Pigp	-0.712624	4.8071	45.1717	1.69529e-06	1.6176e-05
ENSMUSG00000045273	Cenph	2.00809	0.959302	45.1563	1.69934e-06	1.62056e-05
ENSMUSG00000040841	Six5	-0.83834	4.07897	45.1478	1.70158e-06	1.62178e-05
ENSMUSG00000061815	Rufy4	-1.50432	3.14084	45.213	1.70273e-06	1.62195e-05
ENSMUSG00000085156	Gm11974	0.993863	2.26301	45.1288	1.70658e-06	1.62471e-05
ENSMUSG00000043671	Dpy19l3	1.34396	3.8924	45.2437	1.70905e-06	1.62615e-05
ENSMUSG00000018906	P4ha2	-0.84984	5.4011	45.1021	1.71361e-06	1.62957e-05
ENSMUSG00000095788	Sirpb1a	2.75411	1.33573	45.0821	1.71893e-06	1.63279e-05
ENSMUSG00000038178	Slc43a2	1.1673	6.64139	45.3789	1.71878e-06	1.63279e-05
ENSMUSG00000032872	Cyb5r4	0.59023	5.19634	45.0399	1.7302e-06	1.64257e-05
ENSMUSG00000042712	Wbp5	0.935949	5.01713	45.0135	1.73728e-06	1.64837e-05
ENSMUSG00000030681	Mvp	0.56619	7.23198	45.0085	1.73861e-06	1.64871e-05
ENSMUSG00000022885	St6gal1	1.13645	5.33763	45.2904	1.74221e-06	1.65119e-05
ENSMUSG00000052273	Dnah3	-2.31627	0.451301	44.9736	1.74803e-06	1.65578e-05
ENSMUSG00000097867	1110054M08Rik	-1.29323	3.00648	44.9495	1.75457e-06	1.66104e-05
ENSMUSG00000056973	Ces1d	-2.40784	9.06833	45.4797	1.75629e-06	1.66158e-05
ENSMUSG00000005803	Sqrdl	-1.17188	5.97373	45.3581	1.75711e-06	1.66158e-05
ENSMUSG00000025132	Arhgdia	0.532367	9.37394	44.9299	1.75992e-06	1.66332e-05
ENSMUSG00000027495	Fam210b	-0.725839	4.47255	44.9107	1.76516e-06	1.66547e-05
ENSMUSG00000059005	Hnrnpa3	0.612816	7.75591	44.9131	1.76451e-06	1.66547e-05
ENSMUSG00000036985	Zdhhc9	0.631538	6.00741	44.9109	1.7651e-06	1.66547e-05
ENSMUSG00000097124	A530020G20Rik	-1.72718	5.4448	45.4255	1.77082e-06	1.66871e-05
ENSMUSG00000060002	Chpt1	-1.42353	9.75845	44.9237	1.77148e-06	1.66871e-05
ENSMUSG00000020280	Pus10	-0.595873	4.60458	44.8838	1.77254e-06	1.66871e-05
ENSMUSG00000002059	Rab34	-0.948567	6.33957	44.8849	1.77224e-06	1.66871e-05
ENSMUSG00000032218	Ccnb2	2.28757	3.10161	45.3529	1.78004e-06	1.67484e-05
ENSMUSG00000035299	Mid1	1.16857	2.28742	44.8526	1.78115e-06	1.67495e-05
ENSMUSG00000029674	Limk1	0.61632	4.70388	44.8397	1.78471e-06	1.67737e-05
ENSMUSG00000005583	Mef2c	0.797523	5.28324	44.8345	1.78615e-06	1.67779e-05
ENSMUSG00000018920	Cxcl16	1.66639	5.51428	45.3539	1.7902e-06	1.68066e-05
ENSMUSG00000033970	Rfc3	0.763163	3.22414	44.8037	1.79471e-06	1.68396e-05
ENSMUSG00000059851	Suv420h2	0.814564	5.3169	44.794	1.79741e-06	1.68556e-05
ENSMUSG00000025145	Lrrc45	0.628707	4.94811	44.78	1.80133e-06	1.6883e-05
ENSMUSG00000021771	Vdac2	0.400351	7.55824	44.7428	1.81177e-06	1.6966e-05
ENSMUSG00000001844	Zdhhc4	-0.504131	5.07318	44.7413	1.81219e-06	1.6966e-05
ENSMUSG00000025007	Aldh18a1	0.96089	4.31479	44.7314	1.815e-06	1.69785e-05
ENSMUSG00000028159	Dapp1	1.09479	3.74036	44.7295	1.81554e-06	1.69785e-05
ENSMUSG00000028745	Capzb	0.582742	8.3532	44.7095	1.8212e-06	1.70126e-05
ENSMUSG00000063698	Sfxn4	-0.962415	2.84241	44.7101	1.82101e-06	1.70126e-05
ENSMUSG00000004707	Ly9	2.70223	4.42198	45.6106	1.82273e-06	1.70175e-05
ENSMUSG00000029326	Enoph1	0.505992	3.97525	44.6445	1.83971e-06	1.71666e-05
ENSMUSG00000028238	Atp6v0d2	4.59628	7.4131	45.5342	1.84383e-06	1.71956e-05
ENSMUSG00000027330	Cdc25b	0.676361	4.65052	44.6204	1.84663e-06	1.72093e-05
ENSMUSG00000025940	Tmem70	-0.706809	5.50734	44.6179	1.84735e-06	1.72093e-05
ENSMUSG00000042797	Aqp11	-1.40583	2.34665	44.5971	1.85334e-06	1.72556e-05
ENSMUSG00000020154	Ptprb	-0.891844	7.45122	44.5929	1.85455e-06	1.72574e-05
ENSMUSG00000025171	Ubtd1	0.69076	5.34235	44.5684	1.86166e-06	1.7314e-05
ENSMUSG00000019082	Slc25a22	-0.882396	6.35709	44.5221	1.87515e-06	1.74299e-05
ENSMUSG00000031513	Leprotl1	0.390936	5.71561	44.5044	1.88033e-06	1.74685e-05
ENSMUSG00000063568	Jazf1	-0.929386	3.86002	44.4664	1.89152e-06	1.75628e-05
ENSMUSG00000031709	Tbc1d9	1.20585	4.15754	44.5114	1.89317e-06	1.75684e-05
ENSMUSG00000029312	Klhl8	-0.819749	3.99369	44.4262	1.90342e-06	1.76539e-05
ENSMUSG00000040857	Erf	0.66073	5.00982	44.3953	1.91264e-06	1.77297e-05
ENSMUSG00000026463	Atp2b4	-1.29218	7.33171	44.8135	1.91644e-06	1.77551e-05
ENSMUSG00000002847	Pla1a	1.40853	6.07633	44.8446	1.92399e-06	1.78154e-05
ENSMUSG00000086448	9330162012Rik	-1.52131	0.68947	44.2875	1.94516e-06	1.80015e-05
ENSMUSG00000059939	9430015G10Rik	0.656203	3.39302	44.2763	1.94858e-06	1.80091e-05
ENSMUSG00000075023	Accsl	-3.53448	-0.820039	44.2754	1.94885e-06	1.80091e-05
ENSMUSG00000038286	Bphl	-0.933924	4.97807	44.2673	1.95134e-06	1.80091e-05
ENSMUSG00000018474	Chd3	1.16503	6.55167	44.5733	1.95075e-06	1.80091e-05
ENSMUSG00000022404	Slc25a17	-0.48094	5.81335	44.2719	1.94993e-06	1.80091e-05
ENSMUSG00000046603	Tcaim	-0.76634	3.60551	44.2639	1.95237e-06	1.80091e-05
ENSMUSG00000024899	Papss2	-0.847976	6.17496	44.2456	1.95799e-06	1.80511e-05
ENSMUSG00000026096	Osgepl1	-0.794301	3.42046	44.2245	1.96446e-06	1.81009e-05
ENSMUSG00000042292	Mkl1	0.875542	5.44828	44.1656	1.98271e-06	1.82591e-05
ENSMUSG00000022884	Eif4a2	-0.589516	8.3189	44.1444	1.9893e-06	1.83098e-05
ENSMUSG00000075254	Heg1	-0.584817	7.75048	44.1337	1.99266e-06	1.83307e-05
ENSMUSG00000029174	Tbc1d1	0.935496	5.06599	44.1297	1.9939e-06	1.83322e-05
ENSMUSG00000025736	Jmjd8	-0.75421	6.01776	44.1257	1.99517e-06	1.83339e-05
ENSMUSG00000050994	Adgb	-1.98848	1.51256	44.1009	2.00293e-06	1.83852e-05
ENSMUSG00000024791	Cdca5	1.84743	1.72726	44.1037	2.00207e-06	1.83852e-05
ENSMUSG00000059027	9630013D21Rik	-1.91263	3.73399	44.5915	2.01202e-06	1.84486e-05
ENSMUSG00000046312	AI464131	-1.2821	5.40013	44.5572	2.01107e-06	1.84486e-05
ENSMUSG00000005667	Mthfd2	0.953332	3.89423	44.0517	2.01847e-06	1.84978e-05
ENSMUSG00000027253	Lrp4	1.3782	2.33883	44.0268	2.0264e-06	1.85593e-05
ENSMUSG00000017314	Mpp2	-1.11634	3.99865	44.0181	2.02917e-06	1.85593e-05
ENSMUSG00000051344	Plekhm3	0.873343	4.97683	44.0188	2.02897e-06	1.85593e-05
ENSMUSG00000047821	Trim16	-1.13289	5.03863	44.3181	2.02958e-06	1.85593e-05
ENSMUSG00000028047	Thbs3	0.631884	5.03043	44.0072	2.03267e-06	1.85775e-05
ENSMUSG00000048915	Efna5	-0.76622	4.08957	43.9868	2.03918e-06	1.86269e-05
ENSMUSG00000004947	Dtx2	-0.874088	6.10047	43.9651	2.04617e-06	1.86807e-05
ENSMUSG00000039347	Atp6v0e2	-2.04982	5.92284	44.8399	2.04835e-06	1.86905e-05
ENSMUSG00000037649	H2-DMa	0.937054	5.66586	43.9538	2.04983e-06	1.86939e-05
ENSMUSG00000067714	Lpar5	2.20423	1.61964	43.9407	2.05403e-06	1.87222e-05
ENSMUSG00000097643	A130051J06Rik	-1.72465	0.817832	43.9075	2.06482e-06	1.88103e-05
ENSMUSG00000027276	Jag1	-0.603705	5.78186	43.8878	2.07123e-06	1.88585e-05
ENSMUSG00000027357	Crls1	-0.769662	5.00157	43.8715	2.07656e-06	1.88766e-05
ENSMUSG00000028601	Echdc2	-1.76407	4.65501	44.3881	2.07619e-06	1.88766e-05
ENSMUSG00000029602	Rasal1	2.9699	0.367117	43.8754	2.07528e-06	1.88766e-05
ENSMUSG00000029463	Fam216a	-0.547677	3.46479	43.8221	2.09282e-06	1.90142e-05
ENSMUSG00000034903	Cobll1	-1.1141	5.80662	44.1367	2.09618e-06	1.90345e-05
ENSMUSG00000022575	Gsdmd	0.928465	5.30161	43.8068	2.09785e-06	1.90395e-05
ENSMUSG00000030867	Plk1	2.1418	2.77807	44.1044	2.10398e-06	1.90848e-05
ENSMUSG00000078439	2210404O07Rik	1.42989	2.46487	43.7432	2.11904e-06	1.9203e-05
ENSMUSG00000022665	Ccdc80	-1.21571	9.9873	43.7425	2.11928e-06	1.9203e-05
ENSMUSG00000025403	Shmt2	0.400169	5.04147	43.7311	2.12309e-06	1.92273e-05
ENSMUSG00000073664	Nbeal1	-0.541884	5.32663	43.7188	2.12723e-06	1.92544e-05
ENSMUSG00000009394	Syn2	-1.33452	3.0489	43.7128	2.12925e-06	1.92624e-05
ENSMUSG00000035473	Galm	-0.960335	5.37686	43.7674	2.13126e-06	1.92702e-05
ENSMUSG00000039826	Trub2	-0.739062	4.80867	43.6996	2.1337e-06	1.9282e-05
ENSMUSG00000024065	Ehd3	-1.46254	5.67373	44.2077	2.135e-06	1.92834e-05
ENSMUSG00000043613	Mmp3	4.35547	4.23664	44.5577	2.13854e-06	1.93051e-05
ENSMUSG00000079164	Tlr5	-1.10492	3.18005	43.6767	2.14143e-06	1.93209e-05
ENSMUSG00000050188	Lsm10	-0.578864	4.10878	43.6714	2.14324e-06	1.93269e-05
ENSMUSG00000012535	Tnpo3	-0.407883	6.6822	43.6572	2.14805e-06	1.93599e-05
ENSMUSG00000038205	Prkab2	-0.50663	4.91553	43.6429	2.15291e-06	1.93831e-05
ENSMUSG00000037523	Mavs	-0.513212	5.8882	43.631	2.15697e-06	1.94093e-05
ENSMUSG00000053553	3110082I17Rik	0.907525	3.09077	43.5728	2.17694e-06	1.95785e-05
ENSMUSG00000020993	Trappc6b	-0.681718	6.56297	43.5208	2.19494e-06	1.973e-05
ENSMUSG00000050697	Prkaa1	-0.658008	5.62388	43.4913	2.20525e-06	1.98121e-05
ENSMUSG00000035245	Eogt	-0.812801	4.78308	43.4849	2.20749e-06	1.98217e-05
ENSMUSG00000041354	Rgl2	0.581667	6.85622	43.4308	2.22652e-06	1.99819e-05
ENSMUSG00000024989	Cep55	1.90972	2.25121	43.3956	2.23901e-06	2.00834e-05
ENSMUSG00000033068	Entpd6	-0.923671	5.60683	43.3812	2.24414e-06	2.01072e-05
ENSMUSG00000095609	Gm21188	1.67086	3.73296	43.8543	2.24288e-06	2.01072e-05
ENSMUSG00000045658	Pid1	0.674915	6.44959	43.3781	2.24523e-06	2.01072e-05
ENSMUSG00000011008	Mcoln2	2.64495	3.0724	43.8764	2.24788e-06	2.01203e-05
ENSMUSG00000006378	Gcat	-1.44818	2.96966	43.3618	2.25106e-06	2.01381e-05
ENSMUSG00000001506	Col1a1	1.40549	10.2671	43.3516	2.25471e-06	2.01494e-05
ENSMUSG00000068923	Syt11	0.576713	4.09274	43.3543	2.25376e-06	2.01494e-05
ENSMUSG00000031146	Plp2	0.608459	6.34994	43.3411	2.2585e-06	2.01726e-05
ENSMUSG00000041219	Arhgap11a	1.51619	3.86003	43.6706	2.26115e-06	2.01856e-05
ENSMUSG00000033767	D930015E06Rik	0.803946	4.52084	43.3182	2.26674e-06	2.02248e-05
ENSMUSG00000020091	Eif4ebp2	-0.473774	7.75821	43.3041	2.27181e-06	2.02594e-05
ENSMUSG00000063286	Gm8995	1.46373	5.15061	43.7793	2.28222e-06	2.03394e-05
ENSMUSG00000066441	Rdh11	0.59517	4.23234	43.2727	2.28319e-06	2.03394e-05
ENSMUSG00000029388	Eif2b1	-0.464917	5.24193	43.2459	2.29295e-06	2.04156e-05
ENSMUSG00000029401	Rilpl2	0.777861	4.7635	43.2334	2.29752e-06	2.04455e-05
ENSMUSG00000059049	Frem1	4.63408	0.208016	43.2766	2.30453e-06	2.04971e-05
ENSMUSG00000047789	Slc38a9	0.550803	4.59858	43.1818	2.3165e-06	2.05927e-05
ENSMUSG00000004789	Dlst	-0.542585	7.64895	43.1633	2.32336e-06	2.0632e-05
ENSMUSG00000026558	Uck2	-0.846246	4.47264	43.1654	2.32258e-06	2.0632e-05
ENSMUSG00000031591	Asah1	0.907831	7.34231	43.1045	2.34524e-06	2.07935e-05
ENSMUSG00000021725	Parp8	1.36066	3.78364	43.2742	2.34507e-06	2.07935e-05
ENSMUSG00000039153	Runx2	1.61109	3.09735	43.1748	2.34308e-06	2.07935e-05
ENSMUSG00000024601	Isoc1	-1.00684	7.02745	43.1326	2.35271e-06	2.08489e-05
ENSMUSG00000016541	Atxn10	-0.536829	7.43666	43.0213	2.37662e-06	2.10387e-05
ENSMUSG00000054434	Tmem120b	-1.30143	7.03179	43.4859	2.37605e-06	2.10387e-05
ENSMUSG00000086149	Gm15598	-3.5783	-0.632132	42.9856	2.39024e-06	2.11482e-05
ENSMUSG00000029283	Cdc7	0.809561	2.8284	42.9728	2.39512e-06	2.11803e-05
ENSMUSG00000026765	Lypd6b	-1.66468	0.857504	42.9274	2.41258e-06	2.13235e-05
ENSMUSG00000030337	Vamp1	-0.838347	4.38342	42.8946	2.42532e-06	2.14249e-05
ENSMUSG00000034906	Ncaph	1.41141	3.31824	42.8863	2.42852e-06	2.1442e-05
ENSMUSG00000039530	Tusc3	0.721248	4.83058	42.8815	2.43039e-06	2.14473e-05
ENSMUSG00000029001	Fbxo44	-1.2785	2.32068	42.8737	2.43343e-06	2.14517e-05
ENSMUSG00000018846	Pank3	-1.09701	7.88686	42.8588	2.45236e-06	2.16074e-05
ENSMUSG00000031133	Arhgef6	0.791077	6.1867	42.7851	2.46827e-06	2.17249e-05
ENSMUSG00000033705	Stard9	0.889924	5.28272	42.7856	2.46804e-06	2.17249e-05
ENSMUSG00000025465	Echs1	-0.920687	7.41874	42.76	2.47822e-06	2.18011e-05
ENSMUSG00000028541	B4galt2	-0.676052	3.91418	42.7326	2.48915e-06	2.18859e-05
ENSMUSG00000025395	Prim1	1.12328	2.49071	42.719	2.49458e-06	2.19222e-05
ENSMUSG00000025791	Pgm2	-1.04531	7.52298	42.7145	2.505e-06	2.20023e-05
ENSMUSG00000049307	Fut4	1.54862	1.29496	42.684	2.50868e-06	2.20232e-05
ENSMUSG00000000142	Axin2	-1.4932	4.59116	43.1721	2.51041e-06	2.2027e-05
ENSMUSG00000087385	AA415398	-1.01147	2.48477	42.6637	2.51688e-06	2.20723e-05
ENSMUSG00000045136	Tubb2b	1.41586	3.75844	42.8807	2.52288e-06	2.21134e-05
ENSMUSG00000095789	Nupr1l	-1.71749	0.541425	42.6287	2.53109e-06	2.21739e-05
ENSMUSG00000047182	Irs3	-1.3435	6.04717	43.1062	2.53663e-06	2.22109e-05
ENSMUSG00000021597	Ankrd32	-0.858422	3.8387	42.6073	2.5398e-06	2.22157e-05
ENSMUSG00000084512	Gm22482	-1.51058	1.84878	42.6093	2.53897e-06	2.22157e-05
ENSMUSG00000033857	Engase	0.874123	5.21326	42.5995	2.54298e-06	2.2232e-05
ENSMUSG00000098112	Bin2	2.22278	4.25345	43.0339	2.5658e-06	2.24199e-05
ENSMUSG00000078234	Klhdc7a	-1.6319	8.15385	43.0054	2.5774e-06	2.25096e-05
ENSMUSG00000032527	Pccb	-1.21777	7.23011	42.8325	2.58497e-06	2.25641e-05
ENSMUSG00000056481	Cd248	1.18983	7.27665	42.731	2.58666e-06	2.25672e-05
ENSMUSG00000074461	Gm10699	-2.42349	0.603415	42.4794	2.59267e-06	2.2608e-05
ENSMUSG00000032051	Fdx1	-1.39301	4.48761	42.9212	2.59747e-06	2.26381e-05
ENSMUSG00000035835	BC005764	-0.904431	3.86672	42.4474	2.60611e-06	2.27018e-05
ENSMUSG00000025150	Cbr2	-0.68048	5.80746	42.4067	2.6233e-06	2.28397e-05
ENSMUSG00000010911	Apip	-0.855087	5.00935	42.3525	2.64635e-06	2.30286e-05
ENSMUSG00000024640	Psat1	-0.874958	7.47408	42.3267	2.6574e-06	2.31129e-05
ENSMUSG00000039637	Coro7	0.710277	5.98033	42.2648	2.68416e-06	2.33336e-05
ENSMUSG00000005947	Itgae	-1.26976	1.40903	42.2369	2.69631e-06	2.34151e-05
ENSMUSG00000029217	Tec	1.52414	4.28726	42.6866	2.69607e-06	2.34151e-05
ENSMUSG00000030677	Kif22	1.88718	2.95991	42.4978	2.70517e-06	2.348e-05
ENSMUSG00000039252	Lgi2	1.90638	4.53136	42.6958	2.70707e-06	2.34844e-05
ENSMUSG00000031877	Ces2g	1.39627	4.1035	42.4994	2.71407e-06	2.35211e-05
ENSMUSG00000038914	Dido1	-0.810142	5.96962	42.1994	2.71273e-06	2.35211e-05
ENSMUSG00000097702	Gm26739	-2.4426	-0.703439	42.1817	2.72053e-06	2.35408e-05
ENSMUSG00000001761	Smo	-1.05997	5.89622	42.4662	2.71887e-06	2.35408e-05
ENSMUSG00000040560	Wdr7	0.568653	5.2246	42.1821	2.72036e-06	2.35408e-05
ENSMUSG00000029036	Atad3a	-0.528811	5.56239	42.1591	2.73054e-06	2.36033e-05
ENSMUSG00000021752	Kctd6	-0.53884	3.82441	42.1607	2.72982e-06	2.36033e-05
ENSMUSG00000031775	Pllp	-1.85565	3.18605	42.5896	2.73804e-06	2.3656e-05
ENSMUSG00000064354	mt-Co2	-1.21303	2.40023	42.1176	2.74897e-06	2.37383e-05
ENSMUSG00000071547	Nt5dc2	1.24837	4.14788	42.2708	2.75381e-06	2.3768e-05
ENSMUSG00000022313	Utp23	0.595281	3.20402	42.0778	2.76676e-06	2.38554e-05
ENSMUSG00000034957	Cebpa	-1.01527	9.35744	42.0715	2.7696e-06	2.38676e-05
ENSMUSG00000068696	Gpr88	2.95013	-0.0955576	42.0665	2.77187e-06	2.38751e-05
ENSMUSG00000061838	Suclg2	-0.808327	5.54582	42.0393	2.78412e-06	2.39684e-05
ENSMUSG00000021009	Ptpn21	-0.661014	4.69689	42.0278	2.78932e-06	2.4001e-05
ENSMUSG00000016194	Hsd11b1	-2.13762	6.74274	42.8003	2.80947e-06	2.41374e-05
ENSMUSG00000005268	Prlr	-1.32094	3.13708	41.9836	2.80946e-06	2.41374e-05
ENSMUSG00000028312	Smc2	1.39533	3.72475	42.1826	2.80924e-06	2.41374e-05
ENSMUSG00000031985	Gnpat	-0.92835	7.97857	41.9787	2.81167e-06	2.41441e-05
ENSMUSG00000021728	Emb	1.7608	4.45352	42.4369	2.82105e-06	2.42123e-05
ENSMUSG00000020627	Klhl29	-0.99336	3.17511	41.939	2.8299e-06	2.42679e-05
ENSMUSG00000042766	Trim46	1.44272	2.05754	41.938	2.8304e-06	2.42679e-05
ENSMUSG00000038612	Mcl1	0.722796	8.20514	41.928	2.83498e-06	2.42949e-05
ENSMUSG00000021823	Vcl	-0.662045	7.55612	41.9139	2.8415e-06	2.43261e-05
ENSMUSG00000041548	Hspb8	-1.17054	7.02994	42.2178	2.84834e-06	2.43626e-05
ENSMUSG00000033565	Rbfox2	-0.600955	6.18973	41.8985	2.84865e-06	2.43626e-05
ENSMUSG00000048142	Nat8l	-2.14558	6.00129	42.7068	2.85116e-06	2.43718e-05
ENSMUSG00000050052	Tdrp	-1.25521	6.72971	42.3308	2.8536e-06	2.43803e-05
ENSMUSG00000055137	5033411D12Rik	-1.44218	2.54182	41.8386	2.87658e-06	2.45395e-05
ENSMUSG00000052681	Rap1b	0.928053	7.76087	41.8401	2.87588e-06	2.45395e-05
ENSMUSG00000062031	Athl1	-0.406027	5.5979	41.833	2.87919e-06	2.45493e-05
ENSMUSG00000026526	Fh1	-0.653362	6.6803	41.8133	2.88848e-06	2.46161e-05
ENSMUSG00000037296	Lsm1	-0.581558	4.39686	41.7949	2.89714e-06	2.46775e-05
ENSMUSG00000027198	Ext2	-0.438226	6.28627	41.7845	2.90206e-06	2.47069e-05
ENSMUSG00000014503	Pkd2l2	-1.62144	1.71589	41.744	2.92129e-06	2.48582e-05
ENSMUSG00000000538	Tom1l2	-0.631936	6.51805	41.7253	2.93023e-06	2.49217e-05
ENSMUSG00000022555	Dgat1	-1.06419	7.77289	41.729	2.93964e-06	2.49891e-05
ENSMUSG00000029233	Srd5a3	0.589978	5.31259	41.6783	2.95286e-06	2.50763e-05
ENSMUSG00000016128	Stard13	-0.872066	5.16675	41.6804	2.95183e-06	2.50763e-05
ENSMUSG00000001865	Cpa3	3.46529	4.28579	42.4528	2.968e-06	2.51877e-05
ENSMUSG00000028430	Nol6	-0.700705	6.69089	41.645	2.96896e-06	2.51877e-05
ENSMUSG00000078566	Bnip3	-1.35718	8.21703	41.965	2.97066e-06	2.51895e-05
ENSMUSG00000048807	Slc35e4	0.731607	4.32909	41.621	2.98064e-06	2.52615e-05
ENSMUSG00000026492	Tfb2m	-0.697078	3.9955	41.6123	2.98489e-06	2.52848e-05
ENSMUSG00000019518	Ap4m1	-0.380005	5.40101	41.5984	2.99166e-06	2.5297e-05
ENSMUSG00000010048	Ifrd2	-0.457552	4.65485	41.5972	2.99226e-06	2.5297e-05
ENSMUSG00000098557	KCTD12	1.14735	7.05607	41.823	2.99381e-06	2.5297e-05
ENSMUSG00000048537	Phldb1	-1.11106	8.14508	41.6189	2.99259e-06	2.5297e-05
ENSMUSG00000035934	Pknox2	1.49619	2.03805	41.5948	2.99342e-06	2.5297e-05
ENSMUSG00000049866	Arl4c	1.45365	4.59084	41.987	3.01552e-06	2.54677e-05
ENSMUSG00000023571	Fam132a	-0.944732	5.30324	41.575	3.03199e-06	2.5594e-05
ENSMUSG00000010914	Pdhx	-0.65631	5.41019	41.4547	3.06298e-06	2.58428e-05
ENSMUSG00000060063	Alox5ap	1.56939	5.88172	41.8995	3.07499e-06	2.59312e-05
ENSMUSG00000020740	Gga3	0.830159	5.34928	41.4213	3.07978e-06	2.59586e-05
ENSMUSG00000045257	Morn2	-1.12869	2.1666	41.4058	3.08764e-06	2.60119e-05
ENSMUSG00000023104	Rfc2	0.599854	4.94952	41.3815	3.09997e-06	2.61028e-05
ENSMUSG00000051220	Ercc6l	1.6014	1.89091	41.376	3.1028e-06	2.61136e-05
ENSMUSG00000037466	4930427A07Rik	1.84901	1.99455	41.3656	3.1081e-06	2.61451e-05
ENSMUSG00000017670	Elmo2	0.680369	6.33889	41.353	3.11455e-06	2.61847e-05
ENSMUSG00000003123	Lipe	-1.59	10.7021	41.4563	3.1159e-06	2.61847e-05
ENSMUSG00000029163	Emilin1	1.13682	5.82701	41.6121	3.13177e-06	2.6305e-05
ENSMUSG00000029864	Gstk1	-1.24733	5.26976	41.7436	3.13628e-06	2.63298e-05
ENSMUSG00000044167	Foxo1	-0.815704	6.45901	41.3026	3.14048e-06	2.6352e-05
ENSMUSG00000030757	Zkscan2	-3.42936	-0.0520555	41.297	3.14334e-06	2.63629e-05
ENSMUSG00000086677	Gm12284	-2.09054	1.50875	41.2729	3.15584e-06	2.64382e-05
ENSMUSG00000020674	Pxdn	-0.977152	8.28382	41.273	3.15578e-06	2.64382e-05
ENSMUSG00000033965	Slc16a2	0.907971	4.13635	41.2707	3.15701e-06	2.64382e-05
ENSMUSG00000095567	Noc2l	0.514689	6.22377	41.2577	3.16377e-06	2.64817e-05
ENSMUSG00000028803	Nipal3	0.497716	4.40031	41.2489	3.16834e-06	2.65068e-05
ENSMUSG00000033849	B3galt2	-1.60683	7.06199	41.7031	3.174e-06	2.65279e-05
ENSMUSG00000032245	Cln6	0.647658	4.99963	41.2382	3.17393e-06	2.65279e-05
ENSMUSG00000034285	Nipsnap1	-1.23829	3.7342	41.2826	3.18201e-06	2.65817e-05
ENSMUSG00000004455	Ppp1cc	0.543246	5.68707	41.1901	3.19917e-06	2.66987e-05
ENSMUSG00000059409	Ppp2r5d	-0.601682	6.33495	41.1929	3.19768e-06	2.66987e-05
ENSMUSG00000043487	Acot6	-0.81609	2.65017	41.183	3.2029e-06	2.67167e-05
ENSMUSG00000074384	AI429214	-1.09397	2.44584	41.1561	3.21717e-06	2.68224e-05
ENSMUSG00000022639	5330426P16Rik	0.604452	3.97847	41.1153	3.2389e-06	2.69903e-05
ENSMUSG00000085315	A430018G15Rik	-1.38575	2.39313	41.1062	3.24377e-06	2.70176e-05
ENSMUSG00000015290	Ubl4	-0.357608	5.57742	41.0959	3.24928e-06	2.70502e-05
ENSMUSG00000022353	Mtss1	0.549416	6.36305	41.0798	3.25792e-06	2.70554e-05
ENSMUSG00000024431	Nr3c1	-0.590596	6.84589	41.0801	3.25774e-06	2.70554e-05
ENSMUSG00000006542	Prkag3	-2.28958	3.59416	41.5466	3.25545e-06	2.70554e-05
ENSMUSG00000036944	Tmem71	0.84253	3.07766	41.091	3.25192e-06	2.70554e-05
ENSMUSG00000005882	Uqcc1	-0.671323	5.7145	41.0814	3.25707e-06	2.70554e-05
ENSMUSG00000070997	1700055D18Rik	-1.38355	1.52705	41.0609	3.2681e-06	2.71267e-05
ENSMUSG00000021432	Slc35b3	0.503649	4.38775	41.0515	3.27317e-06	2.71555e-05
ENSMUSG00000022089	Bin3	0.709508	4.66816	41.0438	3.27734e-06	2.71767e-05
[truncated: 13,919 more rows]

## Sheet: Fig5A_edgeR_Cre+HFDvsNC_sigUP
GENEID	SYMBOL
ENSMUSG00000094652	Ighv1-42
ENSMUSG00000079049	Serpinb1c
ENSMUSG00000032532	Cck
ENSMUSG00000076655	Ighv4-1
ENSMUSG00000092009	Myh15
ENSMUSG00000076614	Ighg1
ENSMUSG00000085081	A430071A18Rik
ENSMUSG00000063779	Chi3l4
ENSMUSG00000096688	Mup17
ENSMUSG00000070369	Itgad
ENSMUSG00000095753	Igkv4-53
ENSMUSG00000090675	Olfr111
ENSMUSG00000096074	Ighv1-72
ENSMUSG00000039092	Sptlc3
ENSMUSG00000056380	Gpr50
ENSMUSG00000059956	Serpinb12
ENSMUSG00000005716	Pvalb
ENSMUSG00000092517	Art2a-ps
ENSMUSG00000035186	Ubd
ENSMUSG00000033740	St18
ENSMUSG00000052485	Tmem171
ENSMUSG00000097083	D930019O06Rik
ENSMUSG00000030310	Slc6a1
ENSMUSG00000056758	Hmga2
ENSMUSG00000091055	Siglec15
ENSMUSG00000090054	Gm15629
ENSMUSG00000032262	Elovl4
ENSMUSG00000037780	Mbl1
ENSMUSG00000049719	Prss46
ENSMUSG00000006764	Tph2
ENSMUSG00000076576	Igkv6-32
ENSMUSG00000087282	Gm15317
ENSMUSG00000085295	4930430E12Rik
ENSMUSG00000025582	Nptx1
ENSMUSG00000031138	F9
ENSMUSG00000030785	Cox6a2
ENSMUSG00000054932	Afp
ENSMUSG00000074973	Gm11382
ENSMUSG00000028238	Atp6v0d2
ENSMUSG00000023992	Trem2
ENSMUSG00000034226	Rhov
ENSMUSG00000000982	Ccl3
ENSMUSG00000074505	Fat3
ENSMUSG00000040809	Chi3l3
ENSMUSG00000029304	Spp1
ENSMUSG00000031710	Ucp1
ENSMUSG00000029816	Gpnmb
ENSMUSG00000026228	Htr2b
ENSMUSG00000049109	Themis
ENSMUSG00000057465	Saa2
ENSMUSG00000026358	Rgs1
ENSMUSG00000047746	Fbxo40
ENSMUSG00000079625	Tm4sf19
ENSMUSG00000025473	Adam8
ENSMUSG00000076615	Ighg3
ENSMUSG00000029378	Areg
ENSMUSG00000032122	Slc37a2
ENSMUSG00000026100	Mstn
ENSMUSG00000036086	Zranb3
ENSMUSG00000059089	Fcgr4
ENSMUSG00000030117	Gdf3
ENSMUSG00000028459	Cd72
ENSMUSG00000024806	Mlana
ENSMUSG00000024365	Cyp21a1
ENSMUSG00000051107	Gm15440
ENSMUSG00000070366	Ppapdc1a
ENSMUSG00000086109	Gm13391
ENSMUSG00000045065	9930022D16Rik
ENSMUSG00000026981	Il1rn
ENSMUSG00000091175	9130204L05Rik
ENSMUSG00000078780	Gm5150
ENSMUSG00000033777	Tlr13
ENSMUSG00000068697	Myoz1
ENSMUSG00000054510	Gm14461
ENSMUSG00000051596	Otop1
ENSMUSG00000073242	Gm10485
ENSMUSG00000029919	Hpgds
ENSMUSG00000056888	Glipr1
ENSMUSG00000050578	Mmp13
ENSMUSG00000026628	Atf3
ENSMUSG00000095788	Sirpb1a
ENSMUSG00000031438	Rnf128
ENSMUSG00000086150	BC024582
ENSMUSG00000007594	Hapln4
ENSMUSG00000069607	Cd300lh
ENSMUSG00000026204	Ptprn
ENSMUSG00000022494	Shisa9
ENSMUSG00000009654	Oit3
ENSMUSG00000045903	Npas4
ENSMUSG00000024672	Ms4a7
ENSMUSG00000029819	Npy
ENSMUSG00000046323	Dppa3
ENSMUSG00000030789	Itgax
ENSMUSG00000024737	Slc15a3
ENSMUSG00000041552	Ptchd1
ENSMUSG00000014686	Ceacam16
ENSMUSG00000050967	Creg2
ENSMUSG00000003882	Il7r
ENSMUSG00000017767	Spata25
ENSMUSG00000018774	Cd68
ENSMUSG00000024912	Fosl1
ENSMUSG00000027068	Dhrs9
ENSMUSG00000029158	Yipf7
ENSMUSG00000030329	Pianp
ENSMUSG00000029254	Stap1
ENSMUSG00000093388	Gm22655
ENSMUSG00000037341	Slc9a7
ENSMUSG00000029189	Sel1l3
ENSMUSG00000066363	Serpina3f
ENSMUSG00000025017	Pik3ap1
ENSMUSG00000053063	Clec12a
ENSMUSG00000040552	C3ar1
ENSMUSG00000072601	Ear1
ENSMUSG00000031098	Syt8
ENSMUSG00000087477	Gm13822
ENSMUSG00000016349	Eef1a2
ENSMUSG00000021624	Cd180
ENSMUSG00000095028	Sirpb1b
ENSMUSG00000038304	Cd160
ENSMUSG00000028327	1300002K09Rik
ENSMUSG00000098055	Gm26947
ENSMUSG00000089722	Gm11711
ENSMUSG00000097111	Gm26589
ENSMUSG00000036526	Card11
ENSMUSG00000026822	Lcn2
ENSMUSG00000073568	Arl14epl
ENSMUSG00000035448	Ccr3
ENSMUSG00000007682	Dio2
ENSMUSG00000040026	Saa3
ENSMUSG00000049723	Mmp12
ENSMUSG00000019848	Popdc3
ENSMUSG00000096960	A230028O05Rik
ENSMUSG00000044811	AF251705
ENSMUSG00000032530	Lyzl4
ENSMUSG00000015947	Fcgr1
ENSMUSG00000079017	Ifi27l2a
ENSMUSG00000001334	Fndc5
ENSMUSG00000018930	Ccl4
ENSMUSG00000029814	Igf2bp3
ENSMUSG00000059049	Frem1
ENSMUSG00000056054	S100a8
ENSMUSG00000036109	Mbnl3
ENSMUSG00000049598	Vsig8
ENSMUSG00000019876	Pkib
ENSMUSG00000003283	Hck
ENSMUSG00000047904	Sstr2
ENSMUSG00000085152	Gm11496
ENSMUSG00000062082	Cd200r4
ENSMUSG00000044162	Tnip3
ENSMUSG00000004730	Emr1
ENSMUSG00000046805	Mpeg1
ENSMUSG00000047495	Dlgap2
ENSMUSG00000026023	Cdk15
ENSMUSG00000047298	Kcnv2
ENSMUSG00000038147	Cd84
ENSMUSG00000063193	Cd300lb
ENSMUSG00000032076	Cadm1
ENSMUSG00000048216	Gpr85
ENSMUSG00000031443	F7
ENSMUSG00000021998	Lcp1
ENSMUSG00000024300	Myo1f
ENSMUSG00000007107	Atp1a4
ENSMUSG00000040522	Tlr8
ENSMUSG00000025877	Hk3
ENSMUSG00000080115	Mettl21b
ENSMUSG00000040751	Lat2
ENSMUSG00000037868	Egr2
ENSMUSG00000089929	Bcl2a1b
ENSMUSG00000037280	Galnt6
ENSMUSG00000038642	Ctss
ENSMUSG00000044827	Tlr1
ENSMUSG00000027698	Nceh1
ENSMUSG00000026582	Sele
ENSMUSG00000054555	Adam12
ENSMUSG00000022148	Fyb
ENSMUSG00000049130	C5ar1
ENSMUSG00000030579	Tyrobp
ENSMUSG00000007122	Casq1
ENSMUSG00000025154	Arhgap19
ENSMUSG00000020598	Nrcam
ENSMUSG00000028463	Car9
ENSMUSG00000078674	Mup18
ENSMUSG00000030047	Arhgap25
ENSMUSG00000074802	Gas2l3
ENSMUSG00000085184	4933439K11Rik
ENSMUSG00000021886	Gpr65
ENSMUSG00000026065	Slc9a4
ENSMUSG00000000202	Btbd17
ENSMUSG00000021451	Sema4d
ENSMUSG00000025044	Msr1
ENSMUSG00000025574	Tk1
ENSMUSG00000028785	Hpca
ENSMUSG00000072621	Slfn10-ps
ENSMUSG00000051029	Serpinb1b
ENSMUSG00000054342	Kcnn4
ENSMUSG00000053687	Dpep2
ENSMUSG00000087135	Gm16096
ENSMUSG00000084932	Gm15156
ENSMUSG00000022488	Nckap1l
ENSMUSG00000047654	Tssk6
ENSMUSG00000089647	Gm2245
ENSMUSG00000017146	Brca1
ENSMUSG00000015112	Slc25a13
ENSMUSG00000061132	Blnk
ENSMUSG00000029377	Ereg
ENSMUSG00000049988	Lrrc25
ENSMUSG00000005233	Spc25
ENSMUSG00000060131	Atp8b4
ENSMUSG00000034652	Cd300a
ENSMUSG00000074361	C5ar2
ENSMUSG00000027408	Cpxm1
ENSMUSG00000086564	Cd101
ENSMUSG00000074206	Adh6b
ENSMUSG00000021403	Serpinb9b
ENSMUSG00000022667	Cd200r1
ENSMUSG00000032661	Oas3
ENSMUSG00000019874	Fabp7
ENSMUSG00000093726	Gm20667
ENSMUSG00000035183	Slc24a5
ENSMUSG00000055541	Lair1
ENSMUSG00000040204	2810417H13Rik
ENSMUSG00000014602	Kif1a
ENSMUSG00000026437	Cdk18
ENSMUSG00000035041	Creb3l3
ENSMUSG00000001131	Timp1
ENSMUSG00000035459	Stab2
ENSMUSG00000079227	Ccr5
ENSMUSG00000074677	Sirpb1c
ENSMUSG00000070354	Gm21975
ENSMUSG00000034641	Cd300ld
ENSMUSG00000038754	Elovl3
ENSMUSG00000000031	H19
ENSMUSG00000040613	Apobec1
ENSMUSG00000026321	Tnfrsf11a
ENSMUSG00000020399	Havcr2
ENSMUSG00000032220	Myo1e
ENSMUSG00000090024	Gm16350
ENSMUSG00000030895	Hpx
ENSMUSG00000028111	Ctsk
ENSMUSG00000009185	Ccl8
ENSMUSG00000030206	Gsg1
ENSMUSG00000079293	Clec7a
ENSMUSG00000026360	Rgs2
ENSMUSG00000035004	Igsf6
ENSMUSG00000016283	H2-M2
ENSMUSG00000004933	Matk
ENSMUSG00000061578	Ksr2
ENSMUSG00000005413	Hmox1
ENSMUSG00000024696	Lpxn
ENSMUSG00000026442	Nfasc
ENSMUSG00000043157	Arl11
ENSMUSG00000027379	Bub1
ENSMUSG00000011148	Adssl1
ENSMUSG00000033685	Ucp2
ENSMUSG00000093445	Lrch4
ENSMUSG00000040528	Milr1
ENSMUSG00000049848	Ceacam19
ENSMUSG00000023993	Treml1
ENSMUSG00000028825	Rhd
ENSMUSG00000002111	Spi1
ENSMUSG00000030148	Clec4a2
ENSMUSG00000050211	Pla2g4e
ENSMUSG00000090458	Gm17122
ENSMUSG00000030144	Clec4d
ENSMUSG00000050335	Lgals3
ENSMUSG00000037636	Slc25a43
ENSMUSG00000016498	Pdcd1lg2
ENSMUSG00000056737	Capg
ENSMUSG00000041498	Kif14
ENSMUSG00000025328	Padi3
ENSMUSG00000051435	Fhad1
ENSMUSG00000064039	Ccr1l1
ENSMUSG00000081723	Gm15931
ENSMUSG00000039062	Anpep
ENSMUSG00000021250	Fos
ENSMUSG00000034854	Mfsd12
ENSMUSG00000091345	Col6a5
ENSMUSG00000027386	Fbln7
ENSMUSG00000097694	G730013B05Rik
ENSMUSG00000046031	Fam26f
ENSMUSG00000026573	Xcl1
ENSMUSG00000047696	Ccdc144b
ENSMUSG00000024679	Ms4a6d
ENSMUSG00000087327	Gm15884
ENSMUSG00000000290	Itgb2
ENSMUSG00000092386	Gm20536
ENSMUSG00000044313	Mab21l3
ENSMUSG00000028278	Rragd
ENSMUSG00000041827	Oasl1
ENSMUSG00000021262	Evl
ENSMUSG00000039774	Galnt12
ENSMUSG00000028718	Stil
ENSMUSG00000024768	Lipf
ENSMUSG00000074622	Mafb
ENSMUSG00000070291	Ddx43
ENSMUSG00000071552	Tigit
ENSMUSG00000048779	P2ry6
ENSMUSG00000045273	Cenph
ENSMUSG00000034116	Vav1
ENSMUSG00000034773	BC030867
ENSMUSG00000004707	Ly9
ENSMUSG00000068696	Gpr88
ENSMUSG00000036961	Wnt8b
ENSMUSG00000018341	Il12rb2
ENSMUSG00000041449	Serpina3h
ENSMUSG00000070390	Nlrp1b
ENSMUSG00000038390	Gpr162
ENSMUSG00000028678	Kif2c
ENSMUSG00000038508	Gdf15
ENSMUSG00000036931	Nfkbid
ENSMUSG00000018008	Cyth4
ENSMUSG00000032174	Icam5
ENSMUSG00000059493	Nhs
ENSMUSG00000052516	Robo2
ENSMUSG00000097249	Gm26889
ENSMUSG00000024781	Lipa
ENSMUSG00000053977	Cd8a
ENSMUSG00000020901	Pik3r5
ENSMUSG00000046711	Hmga1
ENSMUSG00000053318	Slamf8
ENSMUSG00000073492	Gm10521
ENSMUSG00000017417	Plxdc1
ENSMUSG00000097889	Gm26541
ENSMUSG00000031506	Ptpn7
ENSMUSG00000053930	Shisa6
ENSMUSG00000002100	Mybpc3
ENSMUSG00000078771	Evi2a
ENSMUSG00000021965	Ska3
ENSMUSG00000036905	C1qb
ENSMUSG00000017716	Birc5
ENSMUSG00000027380	Acoxl
ENSMUSG00000025094	Slc18a2
ENSMUSG00000056399	Prss34
ENSMUSG00000045763	Basp1
ENSMUSG00000024965	Fermt3
ENSMUSG00000093765	Gm20658
ENSMUSG00000097770	Gm26776
ENSMUSG00000058715	Fcer1g
ENSMUSG00000054520	Sh3bp2
ENSMUSG00000020330	Hmmr
ENSMUSG00000072109	A530040E14Rik
ENSMUSG00000078773	Rad54b
ENSMUSG00000020120	Plek
ENSMUSG00000037902	Sirpa
ENSMUSG00000001021	S100a3
ENSMUSG00000056494	Cngb3
ENSMUSG00000037946	Fgd3
ENSMUSG00000060044	Tmem26
ENSMUSG00000031827	Cotl1
ENSMUSG00000037544	Dlgap5
ENSMUSG00000022408	Fam83f
ENSMUSG00000052688	5430435G22Rik
ENSMUSG00000085058	8030453O22Rik
ENSMUSG00000022303	Dcstamp
ENSMUSG00000011008	Mcoln2
ENSMUSG00000039748	Exo1
ENSMUSG00000026600	Soat1
ENSMUSG00000021190	Lgmn
ENSMUSG00000089809	A930011G23Rik
ENSMUSG00000033825	Tpsb2
ENSMUSG00000025932	Eya1
ENSMUSG00000030774	Pak1
ENSMUSG00000024209	1700061G19Rik
ENSMUSG00000016529	Il10
ENSMUSG00000037217	Syn1
ENSMUSG00000028581	Laptm5
ENSMUSG00000024617	Camk2a
ENSMUSG00000027956	Tmem144
ENSMUSG00000041216	Clvs1
ENSMUSG00000071324	Armc2
ENSMUSG00000034311	Kif4
ENSMUSG00000031838	Ifi30
ENSMUSG00000049985	Ankrd55
ENSMUSG00000039187	Fanci
ENSMUSG00000020143	Dock2
ENSMUSG00000006731	B4galnt1
ENSMUSG00000028555	Ttc39a
ENSMUSG00000005470	Asf1b
ENSMUSG00000079014	Serpina3i
ENSMUSG00000043740	B430306N03Rik
ENSMUSG00000058818	Pirb
ENSMUSG00000038179	Slamf7
ENSMUSG00000013707	Tnfaip8l2
ENSMUSG00000022225	Cma1
ENSMUSG00000066510	Ankdd1a
ENSMUSG00000040747	Cd53
ENSMUSG00000028132	Tmem56
ENSMUSG00000015880	Ncapg
ENSMUSG00000044042	Fmn1
ENSMUSG00000032446	Eomes
ENSMUSG00000011154	1700026D08Rik
ENSMUSG00000002076	Hsf2bp
ENSMUSG00000061068	Mcpt4
ENSMUSG00000038370	Pcp4l1
ENSMUSG00000040345	Arhgap9
ENSMUSG00000004266	Ptpn6
ENSMUSG00000045404	Kcnk13
ENSMUSG00000020897	Aurkb
ENSMUSG00000027323	Rad51
ENSMUSG00000035683	Melk
ENSMUSG00000028591	Pramef12
ENSMUSG00000085278	Gm12841
ENSMUSG00000029553	Tfec
ENSMUSG00000017754	Pltp
ENSMUSG00000085596	Gm11476
ENSMUSG00000098112	Bin2
ENSMUSG00000019122	Ccl9
ENSMUSG00000004415	Col26a1
ENSMUSG00000026357	Rgs18
ENSMUSG00000079419	Ms4a6c
ENSMUSG00000035020	Epgn
ENSMUSG00000015968	Cacna1d
ENSMUSG00000024770	Lipn
ENSMUSG00000006519	Cyba
ENSMUSG00000029925	Tbxas1
ENSMUSG00000042684	Npl
ENSMUSG00000040133	Gpr176
ENSMUSG00000040373	Cacng5
ENSMUSG00000054293	A630033H20Rik
ENSMUSG00000031722	Hp
ENSMUSG00000055555	4930502E18Rik
ENSMUSG00000078452	Raet1d
ENSMUSG00000034762	Glis1
ENSMUSG00000058542	Gm15590
ENSMUSG00000030147	Clec4b1
ENSMUSG00000032261	Sh3bgrl2
ENSMUSG00000031289	Il13ra2
ENSMUSG00000026809	1700026L06Rik
ENSMUSG00000097471	5830432E09Rik
ENSMUSG00000079547	H2-DMb1
ENSMUSG00000066975	Cryba4
ENSMUSG00000026480	Ncf2
ENSMUSG00000036223	Ska1
ENSMUSG00000023349	Clec4n
ENSMUSG00000024401	Tnf
ENSMUSG00000015437	Gzmb
ENSMUSG00000001750	Tcirg1
ENSMUSG00000039981	Zc3h12d
ENSMUSG00000072620	Slfn2
ENSMUSG00000006585	Cdt1
ENSMUSG00000020256	Aldh1l2
ENSMUSG00000005045	Chd5
ENSMUSG00000020042	Btbd11
ENSMUSG00000062585	Cnr2
ENSMUSG00000046179	E2f8
ENSMUSG00000045912	C2cd4c
ENSMUSG00000052026	Slc6a7
ENSMUSG00000031004	Mki67
ENSMUSG00000049422	Chchd10
ENSMUSG00000059498	Fcgr3
ENSMUSG00000042607	Asb4
ENSMUSG00000006411	Pvrl4
ENSMUSG00000030867	Plk1
ENSMUSG00000075707	Dio3
ENSMUSG00000073412	Lst1
ENSMUSG00000054702	Ap1s3
ENSMUSG00000038932	Tcfl5
ENSMUSG00000063646	Jakmip1
ENSMUSG00000041842	Fhdc1
ENSMUSG00000025020	Slit1
ENSMUSG00000011171	Vipr2
ENSMUSG00000042489	Clspn
ENSMUSG00000048865	Arhgap30
ENSMUSG00000070323	Mmp27
ENSMUSG00000037095	Lrg1
ENSMUSG00000085069	Gm13111
ENSMUSG00000031898	Dpep3
ENSMUSG00000005339	Fcer1a
ENSMUSG00000034883	Lrr1
ENSMUSG00000027843	Ptpn22
ENSMUSG00000026177	Slc11a1
ENSMUSG00000015396	Cd83
ENSMUSG00000029685	Asb15
ENSMUSG00000032355	Mlip
ENSMUSG00000015340	Cybb
ENSMUSG00000032496	Ltf
ENSMUSG00000003363	Pld3
ENSMUSG00000052776	Oas1a
ENSMUSG00000029771	Irf5
ENSMUSG00000024989	Cep55
ENSMUSG00000050157	Gm867
ENSMUSG00000055567	Unc80
ENSMUSG00000078945	Naip2
ENSMUSG00000028927	Padi2
ENSMUSG00000035385	Ccl2
ENSMUSG00000020658	Efr3b
ENSMUSG00000033200	Tpsg1
ENSMUSG00000024791	Cdca5
ENSMUSG00000053024	Cntn2
ENSMUSG00000051354	Samd3
ENSMUSG00000051497	Kcnj16
ENSMUSG00000031264	Btk
ENSMUSG00000033952	Aspm
ENSMUSG00000005087	Cd44
ENSMUSG00000037466	4930427A07Rik
ENSMUSG00000041064	Pif1
ENSMUSG00000043613	Mmp3
ENSMUSG00000000682	Cd52
ENSMUSG00000058099	Nfam1
ENSMUSG00000020914	Top2a
ENSMUSG00000019942	Cdk1
ENSMUSG00000044583	Tlr7
ENSMUSG00000031659	Adcy7
ENSMUSG00000027715	Ccna2
ENSMUSG00000029716	Tfr2
ENSMUSG00000032218	Ccnb2
ENSMUSG00000024056	Ndc80
ENSMUSG00000027469	Tpx2
ENSMUSG00000041431	Ccnb1
ENSMUSG00000022322	Shcbp1
ENSMUSG00000044201	Cdc25c
ENSMUSG00000026683	Nuf2
ENSMUSG00000035455	Fignl1
ENSMUSG00000032020	Ubash3b
ENSMUSG00000022788	Fgd4
ENSMUSG00000031266	Gla
ENSMUSG00000040855	Reps2
ENSMUSG00000064109	Hcst
ENSMUSG00000027670	Ocstamp
ENSMUSG00000041515	Irf8
ENSMUSG00000036896	C1qc
ENSMUSG00000039720	Got1l1
ENSMUSG00000036768	Kif15
ENSMUSG00000028873	Cdca8
ENSMUSG00000061397	Krt79
ENSMUSG00000085584	Rgag1
ENSMUSG00000095105	Edaradd
ENSMUSG00000068606	Gm4841
ENSMUSG00000028702	Rad54l
ENSMUSG00000061666	Gdpd1
ENSMUSG00000074577	Fam65c
ENSMUSG00000051220	Ercc6l
ENSMUSG00000050425	Mrgprb2
ENSMUSG00000031101	Sash3
ENSMUSG00000049928	Glp2r
ENSMUSG00000004612	Nkg7
ENSMUSG00000030162	Olr1
ENSMUSG00000085316	D330050G23Rik
ENSMUSG00000028832	Stmn1
ENSMUSG00000090939	Gm17147
ENSMUSG00000039193	Nlrc4
ENSMUSG00000037411	Serpine1
ENSMUSG00000031432	Prps1
ENSMUSG00000046591	Ticrr
ENSMUSG00000031444	F10
ENSMUSG00000022033	Pbk
ENSMUSG00000030096	Slc6a6
ENSMUSG00000030523	Trpm1
ENSMUSG00000032783	Troap
ENSMUSG00000021728	Emb
ENSMUSG00000043091	Tuba1c
ENSMUSG00000046295	Ankle1
ENSMUSG00000071633	Gm4952
ENSMUSG00000048163	Selplg
ENSMUSG00000016179	Camk1g
ENSMUSG00000097142	Gm26778
ENSMUSG00000001228	Uhrf1
ENSMUSG00000042425	Frmpd3
ENSMUSG00000028133	Rwdd3
ENSMUSG00000075269	Bex6
ENSMUSG00000021423	Ly86
ENSMUSG00000074785	Plxnc1
ENSMUSG00000039873	Neurl2
ENSMUSG00000029414	Kntc1
ENSMUSG00000030223	Ptpro
ENSMUSG00000012443	Kif11
ENSMUSG00000069516	Lyz2
ENSMUSG00000031165	Was
ENSMUSG00000038943	Prc1
ENSMUSG00000001865	Cpa3
ENSMUSG00000001517	Foxm1
ENSMUSG00000017400	Stac2
ENSMUSG00000026778	Prkcq
ENSMUSG00000066861	Oas1g
ENSMUSG00000060560	Ces4a
ENSMUSG00000039396	Neil3
ENSMUSG00000020059	Sycp3
ENSMUSG00000027761	Aadac
ENSMUSG00000083524	Mup-ps21
ENSMUSG00000020808	Fam64a
ENSMUSG00000051439	Cd14
ENSMUSG00000023982	Guca1a
ENSMUSG00000037196	Pacrg
ENSMUSG00000040659	Efhd2
ENSMUSG00000036949	Slc39a12
ENSMUSG00000092349	BC033916
ENSMUSG00000019992	Mtfr2
ENSMUSG00000050721	Plekho2
ENSMUSG00000078249	Hmga1-rs1
ENSMUSG00000047534	Mis18bp1
ENSMUSG00000076612	Ighg2c
ENSMUSG00000071715	Ncf4
ENSMUSG00000048327	Ckap2l
ENSMUSG00000022021	Diap3
ENSMUSG00000027199	Gatm
ENSMUSG00000022237	Ankrd33b
ENSMUSG00000030793	Pycard
ENSMUSG00000015355	Cd48
ENSMUSG00000039809	Gabbr2
ENSMUSG00000091573	Serpina3d-ps
ENSMUSG00000069910	Spdl1
ENSMUSG00000021457	Syk
ENSMUSG00000015829	Tnr
ENSMUSG00000053044	Cd8b1
ENSMUSG00000031963	Bmper
ENSMUSG00000059326	Csf2ra
ENSMUSG00000034738	Nostrin
ENSMUSG00000022372	Sla
ENSMUSG00000030844	Rgs10
ENSMUSG00000097461	Gm26735
ENSMUSG00000092283	Gm20412
ENSMUSG00000039208	Metrnl
ENSMUSG00000003812	Dnase2a
ENSMUSG00000027331	Knstrn
ENSMUSG00000085425	Gm15648
ENSMUSG00000028068	Iqgap3
ENSMUSG00000028972	Car6
ENSMUSG00000096965	3300005D01Rik
ENSMUSG00000057135	Scimp
ENSMUSG00000027506	Tpd52
ENSMUSG00000064342	mt-Ti
ENSMUSG00000035373	Ccl7
ENSMUSG00000006567	Atp7b
ENSMUSG00000028843	Sh3bgrl3
ENSMUSG00000022034	Esco2
ENSMUSG00000026395	Ptprc
ENSMUSG00000015745	Plekho1
ENSMUSG00000049871	Nlrc3
ENSMUSG00000002055	Spag5
ENSMUSG00000019935	Slc17a8
ENSMUSG00000042476	Abcb4
ENSMUSG00000027322	Siglec1
ENSMUSG00000031387	Renbp
ENSMUSG00000016239	Lonrf3
ENSMUSG00000095609	Gm21188
ENSMUSG00000026627	Tmem206
ENSMUSG00000028587	Orc1
ENSMUSG00000043903	Gm22
ENSMUSG00000097134	1110002J07Rik
ENSMUSG00000085327	Gm16104
ENSMUSG00000039055	Eme1
ENSMUSG00000030263	Lrmp
ENSMUSG00000001510	Dlx3
ENSMUSG00000030798	Cd37
ENSMUSG00000035896	Rnase1
ENSMUSG00000074109	Mrgprx2
ENSMUSG00000074731	Zfp345
ENSMUSG00000029322	Plac8
ENSMUSG00000067591	Klra3
ENSMUSG00000031662	Snx20
ENSMUSG00000038204	Asb10
ENSMUSG00000022831	Hcls1
ENSMUSG00000048677	Tpcn2
ENSMUSG00000048922	Cdca2
ENSMUSG00000031262	Cenpi
ENSMUSG00000051506	Wdfy4
ENSMUSG00000039057	Myo16
ENSMUSG00000031756	Cenpn
ENSMUSG00000079685	Ulbp1
ENSMUSG00000027326	Casc5
ENSMUSG00000064065	Ipcef1
ENSMUSG00000078521	Aunip
ENSMUSG00000020437	Myo1g
ENSMUSG00000046456	Tmem150b
ENSMUSG00000043850	Clrn1
ENSMUSG00000074570	Cass4
ENSMUSG00000032089	Il10ra
ENSMUSG00000026979	Psd4
ENSMUSG00000030786	Itgam
ENSMUSG00000030178	Klra13-ps
ENSMUSG00000090564	A430057M04Rik
ENSMUSG00000026220	Slc16a14
ENSMUSG00000011305	Plin5
ENSMUSG00000074476	Spc24
ENSMUSG00000053693	Mast1
ENSMUSG00000030677	Kif22
ENSMUSG00000031740	Mmp2
ENSMUSG00000078942	Naip6
ENSMUSG00000030244	Gys2
ENSMUSG00000017929	B4galt5
ENSMUSG00000005054	Cstb
ENSMUSG00000043895	S1pr2
ENSMUSG00000032322	Pstpip1
ENSMUSG00000039621	Prex1
ENSMUSG00000032643	Fhl3
ENSMUSG00000029204	Rhoh
ENSMUSG00000042306	S100a14
ENSMUSG00000020649	Rrm2
ENSMUSG00000072082	Ccnf
ENSMUSG00000051498	Tlr6
ENSMUSG00000097352	C920009B18Rik
ENSMUSG00000044309	Apol7c
ENSMUSG00000032589	Bsn
ENSMUSG00000057191	AB124611
ENSMUSG00000040471	Ggt6
ENSMUSG00000028931	Kcnab2
ENSMUSG00000054247	Gm9939
ENSMUSG00000027239	Mdk
ENSMUSG00000097840	Gm26756
ENSMUSG00000018927	Ccl6
ENSMUSG00000026429	Ube2t
ENSMUSG00000023913	Pla2g7
ENSMUSG00000022952	Runx1
ENSMUSG00000026458	Ppfia4
ENSMUSG00000024910	Ctsw
ENSMUSG00000041695	Kcnj2
ENSMUSG00000041362	4930506M07Rik
ENSMUSG00000034853	Acot11
ENSMUSG00000049625	Tifab
ENSMUSG00000048612	Myof
ENSMUSG00000021697	Depdc1b
ENSMUSG00000097715	Gpr137b-ps
ENSMUSG00000034394	Lif
ENSMUSG00000027514	Zbp1
ENSMUSG00000005410	Mcm5
ENSMUSG00000053040	Aph1c
ENSMUSG00000036887	C1qa
ENSMUSG00000045328	Cenpe
ENSMUSG00000032691	Nlrp3
ENSMUSG00000036381	P2ry14
ENSMUSG00000026288	Inpp5d
ENSMUSG00000024660	Incenp
ENSMUSG00000026928	Card9
ENSMUSG00000025888	Casp1
ENSMUSG00000015950	Ncf1
ENSMUSG00000043832	Clec4a3
ENSMUSG00000050107	Gsg2
ENSMUSG00000026548	Slamf9
ENSMUSG00000025648	Pfkfb4
ENSMUSG00000006219	Fblim1
ENSMUSG00000072437	Nanos1
ENSMUSG00000026271	Gpr35
ENSMUSG00000026669	Mcm10
ENSMUSG00000049037	Clec4a1
ENSMUSG00000033220	Rac2
ENSMUSG00000098320	VIS1
ENSMUSG00000022102	Dok2
ENSMUSG00000002699	Lcp2
ENSMUSG00000067714	Lpar5
ENSMUSG00000060572	Mfap2
ENSMUSG00000030091	Nup210
ENSMUSG00000042724	Map3k9
ENSMUSG00000073490	AI607873
ENSMUSG00000031097	Tnni2
ENSMUSG00000083307	AA414768
ENSMUSG00000069830	Nlrp1a
ENSMUSG00000032561	Acpp
ENSMUSG00000028751	Pla2g2e
ENSMUSG00000028599	Tnfrsf1b
ENSMUSG00000086291	Gm15513
ENSMUSG00000086712	AI427809
ENSMUSG00000023940	Sgol1
ENSMUSG00000038843	Gcnt1
ENSMUSG00000027748	Trpc4
ENSMUSG00000035891	Cerk
ENSMUSG00000054196	Cthrc1
ENSMUSG00000097654	Gm26714
ENSMUSG00000026796	Fam129b
ENSMUSG00000074899	Sptbn5
ENSMUSG00000051378	Kif18b
ENSMUSG00000035711	Dok3
ENSMUSG00000031609	Sap30
ENSMUSG00000026956	Uap1l1
ENSMUSG00000022945	Chaf1b
ENSMUSG00000058163	Gm5431
ENSMUSG00000089942	Pira2
ENSMUSG00000021636	Marveld2
ENSMUSG00000052142	Rasal3
ENSMUSG00000036718	Micall2
ENSMUSG00000021720	Rnf180
ENSMUSG00000030674	Qprt
ENSMUSG00000071203	Naip5
ENSMUSG00000021569	Trip13
ENSMUSG00000030707	Coro1a
ENSMUSG00000024621	Csf1r
ENSMUSG00000051235	Gen1
ENSMUSG00000072812	Ahnak2
ENSMUSG00000063506	Arhgap22
ENSMUSG00000086763	B230378P21Rik
ENSMUSG00000038352	Arl5c
ENSMUSG00000067889	Sptbn2
ENSMUSG00000020635	Fkbp1b
ENSMUSG00000049001	Ndnf
ENSMUSG00000049643	2310022A10Rik
ENSMUSG00000030577	Cd22
ENSMUSG00000092060	Bend4
ENSMUSG00000086282	Gm15686
ENSMUSG00000023367	Tmem176a
ENSMUSG00000056529	Ptafr
ENSMUSG00000044788	Fads6
ENSMUSG00000027009	Itga4
ENSMUSG00000021384	Susd3
ENSMUSG00000026285	Pdcd1
ENSMUSG00000032344	Mb21d1
ENSMUSG00000042129	Rassf4
ENSMUSG00000042345	Ubash3a
ENSMUSG00000040084	Bub1b
ENSMUSG00000047180	Neurl3
ENSMUSG00000047793	Sned1
ENSMUSG00000031312	Itgb1bp2
ENSMUSG00000035042	Ccl5
ENSMUSG00000026605	Cenpf
ENSMUSG00000033581	Igf2bp2
ENSMUSG00000045294	Insig1
ENSMUSG00000079553	Kifc1
ENSMUSG00000021095	Gsc
ENSMUSG00000040229	Gpr34
ENSMUSG00000055069	Rab39
ENSMUSG00000008153	Clstn3
ENSMUSG00000029217	Tec
ENSMUSG00000021306	Gpr137b
ENSMUSG00000024397	Aif1
ENSMUSG00000026039	Sgol2
ENSMUSG00000028175	Depdc1a
ENSMUSG00000025314	Ptprj
ENSMUSG00000020493	Prr11
ENSMUSG00000028494	Plin2
ENSMUSG00000023169	Slc38a1
ENSMUSG00000062510	Nsl1
ENSMUSG00000052760	A630001G21Rik
ENSMUSG00000029177	Cenpa
ENSMUSG00000083161	Gm11427
ENSMUSG00000040490	Lrfn2
ENSMUSG00000045349	Sh2d5
ENSMUSG00000029910	Mad2l1
ENSMUSG00000031608	Galnt7
ENSMUSG00000020695	Mrc2
ENSMUSG00000029468	P2rx7
ENSMUSG00000039474	Wfs1
ENSMUSG00000029822	Osbpl3
ENSMUSG00000036908	Unc93b1
ENSMUSG00000051212	Gpr183
ENSMUSG00000033024	Klra9
ENSMUSG00000030742	Lat
ENSMUSG00000033966	Cdkl4
ENSMUSG00000038379	Ttk
ENSMUSG00000026196	Bard1
ENSMUSG00000030346	Rad51ap1
ENSMUSG00000078956	Gm14221
ENSMUSG00000069793	Slfn9
ENSMUSG00000027423	Snx5
ENSMUSG00000008496	Pou2f2
ENSMUSG00000036943	Rab8b
ENSMUSG00000025743	Sdc3
ENSMUSG00000034416	Pkd1l2
ENSMUSG00000057948	Unc13d
ENSMUSG00000039936	Pik3cd
ENSMUSG00000056290	Ms4a4b
ENSMUSG00000078444	Gm10941
ENSMUSG00000090125	Pou3f1
ENSMUSG00000071714	Csf2rb2
ENSMUSG00000022385	Gtse1
ENSMUSG00000010142	Tnfrsf13b
ENSMUSG00000024677	Ms4a6b
ENSMUSG00000097373	Gm26877
ENSMUSG00000026586	Prrx1
ENSMUSG00000044350	Lacc1
ENSMUSG00000039206	Daglb
ENSMUSG00000029602	Rasal1
ENSMUSG00000045322	Tlr9
ENSMUSG00000030361	Klrb1a
ENSMUSG00000035439	Haus8
ENSMUSG00000057715	A830018L16Rik
ENSMUSG00000052384	Nrros
ENSMUSG00000036022	Fam122b
ENSMUSG00000055976	Cldn23
ENSMUSG00000058589	Anks1b
ENSMUSG00000040441	Slc26a10
ENSMUSG00000027995	Tlr2
ENSMUSG00000023505	Cdca3
ENSMUSG00000054115	Skp2
ENSMUSG00000068744	Psrc1
ENSMUSG00000003779	Kif20a
ENSMUSG00000024742	Fen1
ENSMUSG00000036046	5031439G07Rik
ENSMUSG00000074336	Apoc4
ENSMUSG00000041481	Serpina3g
ENSMUSG00000024776	Stambpl1
ENSMUSG00000039153	Runx2
ENSMUSG00000027306	Nusap1
ENSMUSG00000026676	Ccdc3
ENSMUSG00000020661	Dnmt3a
ENSMUSG00000039934	Gsap
ENSMUSG00000040212	Emp3
ENSMUSG00000081855	Rpl17-ps5
ENSMUSG00000029560	Snx8
ENSMUSG00000036606	Plxnb2
ENSMUSG00000034786	Gpsm3
ENSMUSG00000047415	Gpr68
ENSMUSG00000027994	Ccdc109b
ENSMUSG00000024795	Kif20b
ENSMUSG00000042759	Apobr
ENSMUSG00000050592	Fam78a
ENSMUSG00000034023	Fancd2
ENSMUSG00000098090	2700099C18Rik
ENSMUSG00000063388	BC023105
ENSMUSG00000000958	Slc7a7
ENSMUSG00000027496	Aurka
ENSMUSG00000056394	Lig1
ENSMUSG00000037202	Prf1
ENSMUSG00000026344	Lypd1
ENSMUSG00000061288	Taok3
ENSMUSG00000050241	Klre1
ENSMUSG00000020778	Ten1
ENSMUSG00000007041	Clic1
ENSMUSG00000028558	Calr4
ENSMUSG00000024670	Cd6
ENSMUSG00000039699	Batf2
ENSMUSG00000074141	Il4i1
ENSMUSG00000031891	Hsd11b2
ENSMUSG00000030268	Bcat1
ENSMUSG00000070547	Mrgprb1
ENSMUSG00000026012	Cd28
ENSMUSG00000061482	Hist1h4d
ENSMUSG00000021948	Prkcd
ENSMUSG00000027381	Bcl2l11
ENSMUSG00000060063	Alox5ap
ENSMUSG00000006589	Aprt
ENSMUSG00000029720	Gm20605
ENSMUSG00000001020	S100a4
ENSMUSG00000092074	Dynlt1a
ENSMUSG00000056130	Ticam2
ENSMUSG00000046993	Gm5637
ENSMUSG00000020573	Pik3cg
ENSMUSG00000026807	Ak8
ENSMUSG00000029082	Bst1
ENSMUSG00000068101	Cenpm
ENSMUSG00000021485	Mxd3
ENSMUSG00000033453	Adamts15
ENSMUSG00000049751	Rpl36al
ENSMUSG00000072844	G530011O06Rik
ENSMUSG00000058290	Espl1
ENSMUSG00000037731	Themis2
ENSMUSG00000009092	Derl3
ENSMUSG00000062524	Ncr1
ENSMUSG00000000318	Clec10a
ENSMUSG00000030827	Fgf21
ENSMUSG00000068009	Bpifb6
ENSMUSG00000087107	AI662270
ENSMUSG00000015312	Gadd45b
ENSMUSG00000058454	Dhcr7
ENSMUSG00000047810	Ccdc88b
ENSMUSG00000026126	Ptpn18
ENSMUSG00000034792	Gna15
ENSMUSG00000023274	Cd4
ENSMUSG00000004267	Eno2
ENSMUSG00000068227	Il2rb
ENSMUSG00000026355	Mcm6
ENSMUSG00000026712	Mrc1
ENSMUSG00000030760	Acer3
ENSMUSG00000050232	Cxcr3
ENSMUSG00000041642	Kif21b
ENSMUSG00000079671	2610203C22Rik
ENSMUSG00000026317	Cln8
ENSMUSG00000037849	Gm4955
ENSMUSG00000034765	Dusp5
ENSMUSG00000053706	B430305J03Rik
ENSMUSG00000006398	Cdc20
ENSMUSG00000031629	Mlf1ip
ENSMUSG00000003206	Ebi3
ENSMUSG00000024663	Rab3il1
ENSMUSG00000053175	Bcl3
ENSMUSG00000044083	Efcab8
ENSMUSG00000047511	Olfr1396
ENSMUSG00000084274	Gm12504
ENSMUSG00000050708	Ftl1
ENSMUSG00000078763	Slfn1
ENSMUSG00000023905	Tnfrsf12a
ENSMUSG00000004952	Rasa4
ENSMUSG00000022602	Arc
ENSMUSG00000051517	Arhgef39
ENSMUSG00000026779	Mastl
ENSMUSG00000031129	Slc9a9
ENSMUSG00000061175	Fnip2
ENSMUSG00000031389	Arhgap4
ENSMUSG00000024675	Ms4a4c
ENSMUSG00000034947	Tmem106a
ENSMUSG00000025488	Cox8b
ENSMUSG00000027654	Fam83d
ENSMUSG00000033031	C330027C09Rik
ENSMUSG00000042349	Ikbke
ENSMUSG00000017718	Afmid
ENSMUSG00000006715	Gmnn
ENSMUSG00000040972	Igsf21
ENSMUSG00000035158	Mitf
ENSMUSG00000046410	Kcnk6
ENSMUSG00000056124	B4galt6
ENSMUSG00000020709	Adap2
ENSMUSG00000057132	Rpgrip1
ENSMUSG00000037337	Map4k1
ENSMUSG00000049709	Nlrp10
ENSMUSG00000022548	Apod
ENSMUSG00000032698	Lmo2
ENSMUSG00000020205	Phlda1
ENSMUSG00000035208	Slfn8
ENSMUSG00000064330	Pde6h
ENSMUSG00000049526	Tmem202
ENSMUSG00000026955	Sapcd2
ENSMUSG00000022422	Dscc1
ENSMUSG00000036469	March1
ENSMUSG00000042097	Zfp239
ENSMUSG00000029470	P2rx4
ENSMUSG00000022769	Sdf2l1
ENSMUSG00000030592	Ryr1
ENSMUSG00000024610	Cd74
ENSMUSG00000049866	Arl4c
ENSMUSG00000064225	Paqr9
ENSMUSG00000034591	Slc41a2
ENSMUSG00000039814	Xkr5
ENSMUSG00000031875	Cmtm3
ENSMUSG00000043557	Mdga1
ENSMUSG00000017861	Mybl2
ENSMUSG00000028369	Svep1
ENSMUSG00000041219	Arhgap11a
ENSMUSG00000085894	Gm15832
ENSMUSG00000007646	Rad51c
ENSMUSG00000033730	Egr3
ENSMUSG00000027293	Ehd4
ENSMUSG00000004207	Psap
ENSMUSG00000036246	Gmip
ENSMUSG00000020258	Glyctk
ENSMUSG00000048897	Zfp710
ENSMUSG00000061119	Prcp
ENSMUSG00000056069	Fam105a
ENSMUSG00000035561	Aldh1b1
ENSMUSG00000015314	Slamf6
ENSMUSG00000044703	Phf11a
ENSMUSG00000097113	Gm19705
ENSMUSG00000079445	B3gnt7
ENSMUSG00000021575	Ahrr
ENSMUSG00000000957	Mmp14
ENSMUSG00000028859	Csf3r
ENSMUSG00000032191	Bcl2l10
ENSMUSG00000041406	BC055324
ENSMUSG00000019558	Slc6a8
ENSMUSG00000085939	Cd63-ps
ENSMUSG00000052087	Rgs14
ENSMUSG00000019312	Grb7
ENSMUSG00000036894	Rap2b
ENSMUSG00000022584	Ly6c2
ENSMUSG00000052889	Prkcb
ENSMUSG00000031762	Mt2
ENSMUSG00000025197	Cyp2c44
ENSMUSG00000087196	Gm13373
ENSMUSG00000042404	Dennd4b
ENSMUSG00000036594	H2-Aa
ENSMUSG00000038917	3930402G23Rik
ENSMUSG00000085030	2810455O05Rik
ENSMUSG00000021549	Rasa1
ENSMUSG00000020218	Wif1
ENSMUSG00000044701	Il27
ENSMUSG00000027505	Fam209
ENSMUSG00000029810	Tmem176b
ENSMUSG00000025938	Slco5a1
ENSMUSG00000018920	Cxcl16
ENSMUSG00000029299	Abcg3
ENSMUSG00000029915	Clec5a
ENSMUSG00000060586	H2-Eb1
ENSMUSG00000037306	Man1c1
ENSMUSG00000058486	Wdr91
ENSMUSG00000020312	Shc2
ENSMUSG00000031543	Ank1
ENSMUSG00000024905	Mtl5
ENSMUSG00000005447	Pafah1b3
ENSMUSG00000036622	Atp13a2
ENSMUSG00000046223	Plaur
ENSMUSG00000027699	Ect2
ENSMUSG00000085129	5031425F14Rik
ENSMUSG00000024124	Prss30
ENSMUSG00000020234	4930404N11Rik
ENSMUSG00000036067	Slc2a6
ENSMUSG00000090084	Srpx
ENSMUSG00000026646	Suv39h2
ENSMUSG00000079845	Xlr4a
ENSMUSG00000051457	Spn
ENSMUSG00000048572	Tmem252
ENSMUSG00000026532	Spta1
ENSMUSG00000060678	Hist1h4c
ENSMUSG00000025534	Gusb
ENSMUSG00000026117	Zap70
ENSMUSG00000059743	Fdps
ENSMUSG00000050493	Fam167b
ENSMUSG00000045216	Hs6st1
ENSMUSG00000032725	Folr2
ENSMUSG00000047407	Tgif1
ENSMUSG00000024691	Fam111a
ENSMUSG00000037628	Cdkn3
ENSMUSG00000033697	Arhgap39
ENSMUSG00000044206	Vsig4
ENSMUSG00000021939	Ctsb
ENSMUSG00000041859	Mcm3
ENSMUSG00000030720	Cln3
ENSMUSG00000060216	Arrb2
ENSMUSG00000026737	Pip4k2a
ENSMUSG00000046688	Tifa
ENSMUSG00000030167	Klrc1
ENSMUSG00000034330	Plcg2
ENSMUSG00000034708	Grn
ENSMUSG00000031934	Panx1
ENSMUSG00000032890	Rims3
ENSMUSG00000040658	Dnph1
ENSMUSG00000073678	Pgap1
ENSMUSG00000031142	Cacna1f
ENSMUSG00000019214	Chtf18
ENSMUSG00000093622	Gm20703
ENSMUSG00000021175	Cdca7l
ENSMUSG00000037725	Ckap2
ENSMUSG00000001473	Tubb6
ENSMUSG00000038623	Tm6sf1
ENSMUSG00000034993	Vat1
ENSMUSG00000040711	Sh3pxd2b
ENSMUSG00000018654	Ikzf1
ENSMUSG00000032537	Ephb1
ENSMUSG00000031971	Ccsap
ENSMUSG00000000278	Scpep1
ENSMUSG00000021508	Cxcl14
ENSMUSG00000053113	Socs3
ENSMUSG00000052160	Pld4
ENSMUSG00000073982	Rhog
ENSMUSG00000024644	Cndp2
ENSMUSG00000064043	Trerf1
ENSMUSG00000040964	Arhgef10l
ENSMUSG00000030134	Rasgef1a
ENSMUSG00000054640	Slc8a1
ENSMUSG00000000386	Mx1
ENSMUSG00000019088	Dnase1l1
ENSMUSG00000039145	Camk1d
ENSMUSG00000022504	Ciita
ENSMUSG00000000901	Mmp11
ENSMUSG00000053158	Fes
ENSMUSG00000056708	Ier5
ENSMUSG00000031385	Plxnb3
ENSMUSG00000025163	Cd7
ENSMUSG00000074213	Gm10642
ENSMUSG00000034764	1700006J14Rik
ENSMUSG00000030149	Klrk1
ENSMUSG00000043664	Tmem221
ENSMUSG00000032093	Cd3e
ENSMUSG00000021458	2010111I01Rik
ENSMUSG00000021322	Aoah
ENSMUSG00000091649	Phf11b
ENSMUSG00000022415	Syngr1
ENSMUSG00000025789	St8sia2
ENSMUSG00000040274	Cdk6
ENSMUSG00000032013	Trim29
ENSMUSG00000073421	H2-Ab1
ENSMUSG00000037860	Aim2
ENSMUSG00000009687	Fxyd5
ENSMUSG00000074342	I830077J02Rik
ENSMUSG00000028312	Smc2
ENSMUSG00000029664	Tfpi2
ENSMUSG00000022510	Trp63
ENSMUSG00000079012	Serpina3m
ENSMUSG00000025058	5430427O19Rik
ENSMUSG00000020275	Rel
ENSMUSG00000052336	Cx3cr1
ENSMUSG00000044338	Aplnr
ENSMUSG00000001525	Tubb5
ENSMUSG00000082809	Gm14150
ENSMUSG00000036743	Psma8
ENSMUSG00000036634	Mag
ENSMUSG00000030737	Slco2b1
ENSMUSG00000029373	Pf4
ENSMUSG00000003824	Syce2
ENSMUSG00000089727	Klra8
ENSMUSG00000026806	Ddx31
ENSMUSG00000024030	Abcg1
ENSMUSG00000032870	Smap2
ENSMUSG00000030536	Iqgap1
ENSMUSG00000071708	Sms
ENSMUSG00000043671	Dpy19l3
ENSMUSG00000023015	Racgap1
ENSMUSG00000026888	Grb14
ENSMUSG00000029622	Arpc1b
ENSMUSG00000040907	Atp1a3
ENSMUSG00000001444	Tbx21
ENSMUSG00000050022	Amz1
ENSMUSG00000028071	Sh2d2a
ENSMUSG00000026873	Phf19
ENSMUSG00000051748	1100001G20Rik
ENSMUSG00000037572	Wdhd1
ENSMUSG00000040276	Pacsin1
ENSMUSG00000035697	Hmha1
ENSMUSG00000022014	Epsti1
ENSMUSG00000021822	Plau
ENSMUSG00000021298	Gpr132
ENSMUSG00000029762	Akr1b8
ENSMUSG00000052837	Junb
ENSMUSG00000037370	Enpp1
ENSMUSG00000030342	Cd9
ENSMUSG00000030605	Mfge8
ENSMUSG00000025192	Entpd7
ENSMUSG00000022305	Lrp12
ENSMUSG00000032254	Kif23
ENSMUSG00000036446	Lum
ENSMUSG00000076490	Trbc1
ENSMUSG00000098206	A430106G13Rik
ENSMUSG00000020021	Fgd6
ENSMUSG00000090399	Nav1
ENSMUSG00000038375	Trp53inp2
ENSMUSG00000028337	Coro2a
ENSMUSG00000049307	Fut4
ENSMUSG00000097245	Gm5421
ENSMUSG00000048126	Col6a3
ENSMUSG00000097328	Tnfsf12
ENSMUSG00000073394	Gm10497
ENSMUSG00000058216	BC021614
ENSMUSG00000072572	Slc39a2
ENSMUSG00000038543	BC028528
ENSMUSG00000084796	A430104N18Rik
ENSMUSG00000031880	Rrad
ENSMUSG00000033386	Frrs1
ENSMUSG00000015354	Pcolce2
ENSMUSG00000004633	Chn2
ENSMUSG00000044702	Palb2
ENSMUSG00000038331	Satb2
ENSMUSG00000081051	Gm15427
ENSMUSG00000031847	1700030J22Rik
ENSMUSG00000036587	Fut7
ENSMUSG00000027224	Duoxa1
ENSMUSG00000021242	Npc2
ENSMUSG00000040061	Plcb2
ENSMUSG00000036875	Dna2
ENSMUSG00000026620	Mark1
ENSMUSG00000003644	Rps6ka1
ENSMUSG00000034206	Polq
ENSMUSG00000002870	Mcm2
ENSMUSG00000037474	Dtl
ENSMUSG00000027339	Rassf2
ENSMUSG00000045625	Pigz
ENSMUSG00000032915	Emr4
ENSMUSG00000033066	Gas7
ENSMUSG00000006517	Mvd
ENSMUSG00000096351	Samd11
ENSMUSG00000030657	Xylt1
ENSMUSG00000030220	Arhgdib
ENSMUSG00000031362	Xlr4c
ENSMUSG00000032812	Arap1
ENSMUSG00000035914	Cd276
ENSMUSG00000029923	Rab19
ENSMUSG00000022221	Ripk3
ENSMUSG00000002603	Tgfb1
ENSMUSG00000032046	Abhd12
ENSMUSG00000097974	Gm10605
ENSMUSG00000006273	Atp6v1b2
ENSMUSG00000022346	Myc
ENSMUSG00000076928	Trac
ENSMUSG00000037944	Ccr7
ENSMUSG00000029380	Cxcl1
ENSMUSG00000032436	Cmtm7
ENSMUSG00000046997	Spsb4
ENSMUSG00000015222	Map2
ENSMUSG00000017652	Cd40
ENSMUSG00000073705	Apitd1
ENSMUSG00000085156	Gm11974
ENSMUSG00000018459	Slc13a3
ENSMUSG00000025232	Hexa
ENSMUSG00000023919	Cenpq
ENSMUSG00000025059	Gyk
ENSMUSG00000027368	Dusp2
ENSMUSG00000071379	Hpcal1
ENSMUSG00000020592	Sdc1
ENSMUSG00000025402	Nab2
ENSMUSG00000060509	Xcr1
ENSMUSG00000038244	Mical2
ENSMUSG00000035365	Parpbp
ENSMUSG00000050777	Tmem37
ENSMUSG00000087150	BC064078
ENSMUSG00000064080	Fbln2
ENSMUSG00000029175	Slc35f6
ENSMUSG00000028063	Lmna
ENSMUSG00000042845	Wfdc12
ENSMUSG00000047045	Tmem164
ENSMUSG00000037313	Tacc3
ENSMUSG00000082292	Gm12250
ENSMUSG00000050390	C77080
ENSMUSG00000068758	Il3ra
ENSMUSG00000022436	Sh3bp1
ENSMUSG00000002033	Cd3g
ENSMUSG00000032193	Ldlr
ENSMUSG00000052821	Cysltr1
ENSMUSG00000056145	AI504432
ENSMUSG00000024589	Nedd4l
ENSMUSG00000066595	Mfsd7b
ENSMUSG00000033949	Trim36
ENSMUSG00000034917	Tjp3
ENSMUSG00000024334	H2-Oa
ENSMUSG00000020264	Slc36a2
ENSMUSG00000049097	Ankrd34a
ENSMUSG00000021675	F2rl2
ENSMUSG00000027797	Dclk1
ENSMUSG00000039476	Prrx2
ENSMUSG00000051343	Rab11fip5
ENSMUSG00000049119	Fam110b
ENSMUSG00000032788	Pdxk
ENSMUSG00000033721	Vav3
ENSMUSG00000021983	Atp8a2
ENSMUSG00000058056	Palld
ENSMUSG00000002668	Dennd1c
ENSMUSG00000021483	Cdk20
ENSMUSG00000031765	Mt1
ENSMUSG00000022656	Pvrl3
ENSMUSG00000056515	Rab31
ENSMUSG00000039377	Hlx
ENSMUSG00000021670	Hmgcr
ENSMUSG00000026786	Apbb1ip
ENSMUSG00000020623	Map2k6
ENSMUSG00000051242	Pcdhb9
ENSMUSG00000017697	Ada
ENSMUSG00000051735	Rinl
ENSMUSG00000073491	Pydc4
ENSMUSG00000032113	Chek1
ENSMUSG00000035295	Wdr38
ENSMUSG00000027955	Fam198b
ENSMUSG00000028527	Ak4
ENSMUSG00000011256	Adam19
ENSMUSG00000020848	Doc2b
ENSMUSG00000045799	Gm9800
ENSMUSG00000040710	St8sia4
ENSMUSG00000027342	Pcna
ENSMUSG00000064373	Sepp1
ENSMUSG00000033207	Mamdc2
ENSMUSG00000026547	Tagln2
ENSMUSG00000093594	Gm20707
ENSMUSG00000058672	Tubb2a
ENSMUSG00000030303	Far2
ENSMUSG00000031504	Rab20
ENSMUSG00000005124	Wisp1
ENSMUSG00000019302	Atp6v0a1
ENSMUSG00000029401	Rilpl2
ENSMUSG00000040713	Creg1
ENSMUSG00000002835	Chaf1a
ENSMUSG00000034317	Trim59
ENSMUSG00000005667	Mthfd2
ENSMUSG00000080374	Gm22953
ENSMUSG00000032802	Srxn1
ENSMUSG00000010021	Kif19a
ENSMUSG00000021281	Tnfaip2
ENSMUSG00000028917	Plekhm2
ENSMUSG00000025395	Prim1
ENSMUSG00000026832	Cytip
ENSMUSG00000042351	Grap2
ENSMUSG00000042225	Ammecr1
ENSMUSG00000020818	Mfsd11
ENSMUSG00000004099	Dnmt1
ENSMUSG00000021003	Galc
ENSMUSG00000032507	Fbxl2
ENSMUSG00000033762	Recql4
ENSMUSG00000044595	Dnd1
ENSMUSG00000039252	Lgi2
ENSMUSG00000025007	Aldh18a1
ENSMUSG00000026708	Cenpl
ENSMUSG00000031903	Pla2g15
ENSMUSG00000060594	Layn
ENSMUSG00000096606	Gm4980
ENSMUSG00000020641	Rsad2
ENSMUSG00000054589	Gm9949
ENSMUSG00000034353	Ramp1
ENSMUSG00000029516	Cit
ENSMUSG00000042286	Stab1
ENSMUSG00000085143	Gm11520
ENSMUSG00000069899	Gm12166
ENSMUSG00000021701	Plk2
ENSMUSG00000057219	Armc7
ENSMUSG00000027544	Nfatc2
ENSMUSG00000034906	Ncaph
ENSMUSG00000023067	Cdkn1a
ENSMUSG00000021365	Nedd9
ENSMUSG00000054400	Cklf
ENSMUSG00000026639	Lamb3
ENSMUSG00000022440	C1qtnf6
ENSMUSG00000042029	Ncapg2
ENSMUSG00000031647	Mfap3l
ENSMUSG00000037907	Ankrd13b
ENSMUSG00000000409	Lck
ENSMUSG00000059852	Kcng2
ENSMUSG00000002297	Dbf4
ENSMUSG00000038151	Prdm1
ENSMUSG00000026109	Tmeff2
ENSMUSG00000031355	Arhgap6
ENSMUSG00000025408	Ddit3
ENSMUSG00000070056	Mfhas1
ENSMUSG00000022439	Parvg
ENSMUSG00000038910	Plcl2
ENSMUSG00000029552	Tes
ENSMUSG00000035873	Pawr
ENSMUSG00000017760	Ctsa
ENSMUSG00000037148	Arhgap10
ENSMUSG00000018167	Stard3
ENSMUSG00000059791	Nrm
ENSMUSG00000023087	Ccrn4l
ENSMUSG00000082286	Pisd-ps1
ENSMUSG00000032501	Trib1
ENSMUSG00000020458	Rtn4
ENSMUSG00000027035	Cers6
ENSMUSG00000025964	Adam23
ENSMUSG00000037649	H2-DMa
ENSMUSG00000024084	Qpct
ENSMUSG00000046719	Nxph3
ENSMUSG00000019132	BC005537
ENSMUSG00000063286	Gm8995
ENSMUSG00000045382	Cxcr4
ENSMUSG00000022514	Il1rap
ENSMUSG00000020974	Pole2
ENSMUSG00000018500	Adora2b
ENSMUSG00000038650	Rnh1
ENSMUSG00000023990	Tfeb
ENSMUSG00000073802	Cdkn2b
ENSMUSG00000032577	Mapkapk3
ENSMUSG00000036565	Ttyh3
ENSMUSG00000048234	Rnf149
ENSMUSG00000026580	Selp
ENSMUSG00000041836	Ptpre
ENSMUSG00000034006	Pqlc1
ENSMUSG00000020261	Slc36a1
ENSMUSG00000034959	5031414D18Rik
ENSMUSG00000037995	Igsf9
ENSMUSG00000035273	Hpse
ENSMUSG00000056531	Ccdc18
ENSMUSG00000023994	Nfya
ENSMUSG00000033467	Crlf2
ENSMUSG00000048497	Mmgt2
ENSMUSG00000024413	Npc1
ENSMUSG00000040479	Dgkz
ENSMUSG00000037568	Vash2
ENSMUSG00000025190	Got1
ENSMUSG00000044244	Il20rb
ENSMUSG00000026341	Actr3
ENSMUSG00000021665	Hexb
ENSMUSG00000005465	Il27ra
ENSMUSG00000034855	Cxcl10
ENSMUSG00000004677	Myo9b
ENSMUSG00000059201	Lep
ENSMUSG00000004113	Cacna1b
ENSMUSG00000021391	Cenpp
ENSMUSG00000041654	Slc39a11
ENSMUSG00000005142	Man2b1
ENSMUSG00000009378	Slc16a12
ENSMUSG00000024590	Lmnb1
ENSMUSG00000020400	Tnip1
ENSMUSG00000024301	Kifc5b
ENSMUSG00000057337	Chst3
ENSMUSG00000024521	Pmaip1
ENSMUSG00000001403	Ube2c
ENSMUSG00000049687	Fam109b
ENSMUSG00000032712	2810474O19Rik
ENSMUSG00000031833	Mast3
ENSMUSG00000027883	Gpsm2
ENSMUSG00000061414	Efcab4b
ENSMUSG00000019853	Hebp2
ENSMUSG00000025001	Hells
ENSMUSG00000025986	Slc39a10
ENSMUSG00000029718	Pcolce
ENSMUSG00000049112	Oxtr
ENSMUSG00000026622	Nek2
ENSMUSG00000086742	Gm16201
ENSMUSG00000084145	Gm12263
ENSMUSG00000001763	Tspan33
ENSMUSG00000068335	Dok1
ENSMUSG00000034265	Zdhhc14
ENSMUSG00000038459	Abhd17c
ENSMUSG00000024818	Slc25a45
ENSMUSG00000026043	Col3a1
ENSMUSG00000016256	Ctsz
ENSMUSG00000079442	St6galnac4
ENSMUSG00000025351	Cd63
ENSMUSG00000026259	Ngef
ENSMUSG00000055809	Dnaaf3
ENSMUSG00000096950	Gm9530
ENSMUSG00000071547	Nt5dc2
ENSMUSG00000045362	Tnfrsf26
ENSMUSG00000024013	Fgd2
ENSMUSG00000072235	Tuba1a
ENSMUSG00000040740	Slc25a34
ENSMUSG00000049744	Arhgap15
ENSMUSG00000024816	Frmd8
ENSMUSG00000035279	Ssc5d
ENSMUSG00000032312	Csk
ENSMUSG00000007891	Ctsd
ENSMUSG00000001128	Cfp
ENSMUSG00000037820	Tgm2
ENSMUSG00000024900	Cpt1a
ENSMUSG00000035181	Heatr5a
ENSMUSG00000016496	Cd274
ENSMUSG00000033105	Lss
ENSMUSG00000059555	Tor4a
ENSMUSG00000045980	Tmem104
ENSMUSG00000008136	Fhl2
ENSMUSG00000022150	Dab2
ENSMUSG00000022876	Samsn1
ENSMUSG00000039431	Mtmr7
ENSMUSG00000033880	Lgals3bp
ENSMUSG00000063535	Zfp773
ENSMUSG00000043004	Gng2
ENSMUSG00000045165	AI467606
ENSMUSG00000025747	Tyms
ENSMUSG00000066442	Mthfs
ENSMUSG00000032359	Ctsh
ENSMUSG00000030641	4632434I11Rik
ENSMUSG00000047881	Rell1
ENSMUSG00000029416	Slc15a4
ENSMUSG00000042331	Specc1
ENSMUSG00000020773	Trim47
ENSMUSG00000073405	C920025E04Rik
ENSMUSG00000025355	Mmp19
ENSMUSG00000028249	Sdcbp
ENSMUSG00000047878	A4galt
ENSMUSG00000032717	Mdfi
ENSMUSG00000032593	Amigo3
ENSMUSG00000061232	H2-K1
ENSMUSG00000046841	Ckap4
ENSMUSG00000031907	Zfp90
ENSMUSG00000042292	Mkl1
ENSMUSG00000052512	Nav2
ENSMUSG00000040722	Scamp5
ENSMUSG00000057342	Sphk2
ENSMUSG00000043085	Tmem82
ENSMUSG00000047123	Ticam1
ENSMUSG00000020935	Dcakd
ENSMUSG00000021054	Sgpp1
ENSMUSG00000078485	Plekhn1
ENSMUSG00000023345	Poc1a
ENSMUSG00000036330	Slc18a1
ENSMUSG00000058126	Tpm3-rs7
ENSMUSG00000045751	Mms22l
ENSMUSG00000042622	Maff
ENSMUSG00000029366	Dck
ENSMUSG00000075028	Prdm11
ENSMUSG00000022636	Alcam
ENSMUSG00000041112	Elmo1
ENSMUSG00000090625	Gm20721
ENSMUSG00000079339	Gm14446
ENSMUSG00000040690	Col16a1
ENSMUSG00000023947	Nfkbie
ENSMUSG00000019979	Apaf1
ENSMUSG00000046432	Ngfrap1
ENSMUSG00000022360	Atad2
ENSMUSG00000009772	Nuak2
ENSMUSG00000000594	Gm2a
ENSMUSG00000059195	Gm12715
ENSMUSG00000034902	Pip5k1c
ENSMUSG00000017631	Abr
ENSMUSG00000018293	Pfn1
ENSMUSG00000029661	Col1a2
ENSMUSG00000001467	Cyp51
ENSMUSG00000049775	Tmsb4x
ENSMUSG00000038034	Igsf8
ENSMUSG00000043421	Hilpda
ENSMUSG00000026657	Frmd4a
ENSMUSG00000079470	Utp14b
ENSMUSG00000045136	Tubb2b
ENSMUSG00000031383	Dusp9
ENSMUSG00000021108	Prkch
ENSMUSG00000031885	Cbfb
ENSMUSG00000029108	Pcdh7
ENSMUSG00000028896	Rcc1
ENSMUSG00000054951	9130008F23Rik
ENSMUSG00000003348	Mob3a
ENSMUSG00000037894	H2afz
ENSMUSG00000032834	Pwp2
ENSMUSG00000025171	Ubtd1
ENSMUSG00000024164	C3
ENSMUSG00000052459	Atp6v1a
ENSMUSG00000035228	Ccdc106
ENSMUSG00000037966	Ninj1
ENSMUSG00000030225	Dera
ENSMUSG00000022864	D16Ertd472e
ENSMUSG00000074925	Ptar1
ENSMUSG00000027959	Sass6
ENSMUSG00000028194	Ddah1
ENSMUSG00000046080	Clec9a
ENSMUSG00000042213	Zfand4
ENSMUSG00000070392	Gm20634
ENSMUSG00000035458	Tnni3
ENSMUSG00000022901	Cd86
ENSMUSG00000020644	Id2
ENSMUSG00000025225	Nfkb2
ENSMUSG00000036155	Mgat5
ENSMUSG00000059901	Adamts14
ENSMUSG00000094796	BC147527
ENSMUSG00000098557	KCTD12
ENSMUSG00000024338	Psmb8
ENSMUSG00000026623	Lpgat1
ENSMUSG00000084319	Tpt1-ps3
ENSMUSG00000006403	Adamts4
ENSMUSG00000023272	Creld2
ENSMUSG00000038059	Smim3
ENSMUSG00000021725	Parp8
ENSMUSG00000028159	Dapp1
ENSMUSG00000026069	Il1rl1
ENSMUSG00000004530	Coro1c
ENSMUSG00000033161	Atp1a1
ENSMUSG00000031613	Hpgd
ENSMUSG00000022947	Cbr3
ENSMUSG00000031604	Sc4mol
ENSMUSG00000019773	Fbxo5
ENSMUSG00000078502	Gm13212
ENSMUSG00000019464	Ptger1
ENSMUSG00000024268	Celf4
ENSMUSG00000049882	Mettl21d
ENSMUSG00000026107	Nabp1
ENSMUSG00000026536	Mnda
ENSMUSG00000005442	Cic
ENSMUSG00000040829	Zmynd15
ENSMUSG00000032815	Fanca
ENSMUSG00000079523	Tmsb10
ENSMUSG00000052102	Gnpda1
ENSMUSG00000031375	Bgn
ENSMUSG00000078439	2210404O07Rik
ENSMUSG00000059401	Mamld1
ENSMUSG00000039497	Dse
ENSMUSG00000046157	Tmem229b
ENSMUSG00000026134	Prim2
ENSMUSG00000052593	Adam17
ENSMUSG00000041319	Thoc6
ENSMUSG00000000555	Itga5
ENSMUSG00000026389	Steap3
ENSMUSG00000054428	Atpif1
ENSMUSG00000033857	Engase
ENSMUSG00000026675	Hsd17b7
ENSMUSG00000030978	Rrm1
ENSMUSG00000020053	Igf1
ENSMUSG00000049580	Tsku
ENSMUSG00000025348	Itga7
ENSMUSG00000031103	Elf4
ENSMUSG00000007379	Dennd2c
ENSMUSG00000093327	Mir5107
ENSMUSG00000036334	Igsf10
ENSMUSG00000048120	Entpd1
ENSMUSG00000032846	Zswim6
ENSMUSG00000031367	Ap1s2
ENSMUSG00000027639	Samhd1
ENSMUSG00000037204	9430023L20Rik
ENSMUSG00000046722	Cdc42se1
ENSMUSG00000067916	Gm13139
ENSMUSG00000022957	Itsn1
ENSMUSG00000097101	1810034E14Rik
ENSMUSG00000019845	Tube1
ENSMUSG00000024516	Sec11c
ENSMUSG00000008475	Arpc5
ENSMUSG00000023915	Tnfrsf21
ENSMUSG00000049932	H2afx
ENSMUSG00000038811	Gngt2
ENSMUSG00000013698	Pea15a
ENSMUSG00000091780	Sco2
ENSMUSG00000039116	Gpr126
ENSMUSG00000025969	Nrp2
ENSMUSG00000031548	Sfrp1
ENSMUSG00000020941	Map3k14
ENSMUSG00000022489	Pde1b
ENSMUSG00000031304	Il2rg
ENSMUSG00000000134	Tfe3
ENSMUSG00000044881	Coa4
ENSMUSG00000037960	1110007C09Rik
ENSMUSG00000029994	Anxa4
ENSMUSG00000037913	Tmem156
ENSMUSG00000060568	Fam78b
ENSMUSG00000046791	2410016O06Rik
ENSMUSG00000062248	Cks2
ENSMUSG00000040430	Pitpnc1
ENSMUSG00000027351	Spred1
ENSMUSG00000075284	Wipf1
ENSMUSG00000038644	Pold1
ENSMUSG00000040537	Adam22
ENSMUSG00000030064	Frmd4b
ENSMUSG00000059479	B3gnt8
ENSMUSG00000021765	Fst
ENSMUSG00000026875	Traf1
ENSMUSG00000026648	Dclre1c
ENSMUSG00000046721	Rpl14-ps1
ENSMUSG00000041058	Wwp1
ENSMUSG00000029161	Cgref1
ENSMUSG00000081272	Gm13509
ENSMUSG00000040675	Mthfd1l
ENSMUSG00000045672	Col27a1
ENSMUSG00000043398	Gpr135
ENSMUSG00000027454	Gins1
ENSMUSG00000009585	Apobec3
ENSMUSG00000031378	Abcd1
ENSMUSG00000025779	Ly96
ENSMUSG00000021596	Mctp1
ENSMUSG00000027962	Vcam1
ENSMUSG00000039648	Ccbl1
ENSMUSG00000029291	Rufy3
ENSMUSG00000031216	Stard8
ENSMUSG00000037613	Tnfrsf23
ENSMUSG00000055805	Fmnl1
ENSMUSG00000024885	Aldh3b1
ENSMUSG00000048355	Arxes1
ENSMUSG00000003546	Klc4
ENSMUSG00000043008	Klhl6
ENSMUSG00000015837	Sqstm1
ENSMUSG00000028059	Arhgef2
ENSMUSG00000031133	Arhgef6
ENSMUSG00000026749	Nek6
ENSMUSG00000006304	Arpc2
ENSMUSG00000018965	Ywhah
ENSMUSG00000029657	Hsph1
ENSMUSG00000042742	B630005N14Rik
ENSMUSG00000027750	Postn
ENSMUSG00000039452	Snx22
ENSMUSG00000039316	Rftn1
ENSMUSG00000020152	Actr2
ENSMUSG00000091144	Phf11c
ENSMUSG00000060639	Hist1h4i
ENSMUSG00000062127	Cttnbp2nl
ENSMUSG00000027540	Ptpn1
ENSMUSG00000004317	Clcn5
ENSMUSG00000033470	Cysltr2
ENSMUSG00000098183	Gm27010
ENSMUSG00000023991	Foxp4
ENSMUSG00000030766	Arhgap17
ENSMUSG00000035354	Uvrag
ENSMUSG00000034041	Lyl1
ENSMUSG00000003814	Calr
ENSMUSG00000003355	Fkbp11
ENSMUSG00000026430	Rassf5
ENSMUSG00000038178	Slc43a2
ENSMUSG00000044147	Arf6
ENSMUSG00000033033	Calhm2
ENSMUSG00000031897	Psmb10
ENSMUSG00000054717	Hmgb2
ENSMUSG00000042821	Snai1
ENSMUSG00000037348	Paqr7
ENSMUSG00000031349	Nsdhl
ENSMUSG00000039294	BC017643
ENSMUSG00000056501	Cebpb
ENSMUSG00000024529	Lox
ENSMUSG00000034613	Ppm1h
ENSMUSG00000035671	Zswim4
ENSMUSG00000019194	Scn1b
ENSMUSG00000025178	Pi4k2a
ENSMUSG00000025269	Apex2
ENSMUSG00000021759	Ppap2a
ENSMUSG00000032750	Gab3
ENSMUSG00000037872	Darc
ENSMUSG00000067203	H2-K2
ENSMUSG00000028385	Snx30
ENSMUSG00000028328	Tmod1
ENSMUSG00000052949	Rnf157
ENSMUSG00000045312	Lhfpl2
ENSMUSG00000021109	Hif1a
ENSMUSG00000042804	Gpr153
ENSMUSG00000055612	Cdca7
ENSMUSG00000042842	Serpinb6b
ENSMUSG00000042228	Lyn
ENSMUSG00000021932	Rnaseh2b
ENSMUSG00000040687	Madd
ENSMUSG00000033538	Casp4
ENSMUSG00000021504	B4galt7
ENSMUSG00000035109	Shc4
ENSMUSG00000022070	Bora
ENSMUSG00000019891	Dcbld1
ENSMUSG00000009090	Ap1b1
ENSMUSG00000045659	Plekha7
ENSMUSG00000039887	Alg14
ENSMUSG00000021477	Ctsl
ENSMUSG00000070031	Sp140
ENSMUSG00000022841	Ap2m1
ENSMUSG00000032231	Anxa2
ENSMUSG00000070034	Sp110
ENSMUSG00000022335	Zfat
ENSMUSG00000005107	Slc2a9
ENSMUSG00000056201	Cfl1
ENSMUSG00000035107	Dcbld2
ENSMUSG00000031628	Casp3
ENSMUSG00000022270	Fam134b
ENSMUSG00000010830	Kdelr3
ENSMUSG00000001270	Ckb
ENSMUSG00000030218	Mgp
ENSMUSG00000041084	Ostc
ENSMUSG00000024986	Hhex
ENSMUSG00000017386	Traf4
ENSMUSG00000056952	Tatdn2
ENSMUSG00000071713	Csf2rb
ENSMUSG00000029554	Mad1l1
ENSMUSG00000029234	Tmem165
ENSMUSG00000024772	Ehd1
ENSMUSG00000097415	AU020206
ENSMUSG00000070284	Gmppb
ENSMUSG00000039616	Mocos
ENSMUSG00000047986	Palm3
ENSMUSG00000042686	Jph1
ENSMUSG00000028334	Nans
ENSMUSG00000071078	Nr2c2ap
ENSMUSG00000028438	Kif24
ENSMUSG00000029363	Rfc5
ENSMUSG00000023277	Twf2
ENSMUSG00000028864	Hgf
ENSMUSG00000017561	Crlf3
ENSMUSG00000003873	Bax
ENSMUSG00000049562	Ap5b1
ENSMUSG00000026880	Stom
ENSMUSG00000036672	Cenpt
ENSMUSG00000031709	Tbc1d9
ENSMUSG00000022565	Plec
ENSMUSG00000029135	Fosl2
ENSMUSG00000073468	Sft2d1
ENSMUSG00000054000	Tusc1
ENSMUSG00000029821	Dfna5
ENSMUSG00000069682	Gm10275
ENSMUSG00000062075	Lmnb2
ENSMUSG00000037405	Icam1
ENSMUSG00000079003	Samd1
ENSMUSG00000017499	Cdc6
ENSMUSG00000034845	Plvap
ENSMUSG00000020184	Mdm2
ENSMUSG00000020097	Sgpl1
ENSMUSG00000043243	Fam129c
ENSMUSG00000003134	Tbc1d8
ENSMUSG00000020100	Slc29a3
ENSMUSG00000034333	Zbed4
ENSMUSG00000050410	Tcf19
ENSMUSG00000030493	C230052I12Rik
ENSMUSG00000037278	Tmem97
ENSMUSG00000027340	Slc23a2
ENSMUSG00000034595	Ppp1r18
ENSMUSG00000032400	Zwilch
ENSMUSG00000028693	Nasp
ENSMUSG00000050471	Fam118b
ENSMUSG00000055491	Pprc1
ENSMUSG00000035299	Mid1
ENSMUSG00000062175	Tgif2
ENSMUSG00000039942	Ptger4
ENSMUSG00000059182	Skap2
ENSMUSG00000027533	Fabp5
ENSMUSG00000057672	Pkn1
ENSMUSG00000035934	Pknox2
ENSMUSG00000081534	Slc48a1
ENSMUSG00000040249	Lrp1
ENSMUSG00000031824	6430548M08Rik
ENSMUSG00000041920	Slc16a6
ENSMUSG00000047832	Cdca4
ENSMUSG00000024063	Lbh
ENSMUSG00000042766	Trim46
ENSMUSG00000024121	Atp6v0c
ENSMUSG00000010307	Tmem86a
ENSMUSG00000031706	Rfx1
ENSMUSG00000033355	Rtp4
ENSMUSG00000043419	A030009H04Rik
ENSMUSG00000067212	H2-T23
ENSMUSG00000022978	Mis18a
ENSMUSG00000034216	Vps18
ENSMUSG00000029233	Srd5a3
ENSMUSG00000024732	Ccdc86
ENSMUSG00000023143	Nagpa
ENSMUSG00000001768	Rin2
ENSMUSG00000021038	Vipas39
ENSMUSG00000054517	Trim65
ENSMUSG00000024235	Map3k8
ENSMUSG00000026433	Rab7l1
ENSMUSG00000039195	1110008P14Rik
ENSMUSG00000030761	Myo7a
ENSMUSG00000031669	Gins3
ENSMUSG00000039994	Timeless
ENSMUSG00000026049	Tex30
ENSMUSG00000037295	Ldlrap1
ENSMUSG00000062753	AI413582
ENSMUSG00000089762	Ier5l
ENSMUSG00000007833	Aldh16a1
ENSMUSG00000018381	Abi3
ENSMUSG00000042500	Ago4
ENSMUSG00000078994	Zfp429
ENSMUSG00000070000	Fcho1
ENSMUSG00000027820	Mme
ENSMUSG00000034105	Tldc1
ENSMUSG00000045658	Pid1
ENSMUSG00000059851	Suv420h2
ENSMUSG00000061878	Sphk1
ENSMUSG00000028923	Necap2
ENSMUSG00000025647	Shisa5
ENSMUSG00000040034	Nup43
ENSMUSG00000040857	Erf
ENSMUSG00000059923	Grb2
ENSMUSG00000026123	Plekhb2
ENSMUSG00000025283	Sat1
ENSMUSG00000020611	Gna13
ENSMUSG00000020740	Gga3
ENSMUSG00000038612	Mcl1
ENSMUSG00000028708	Mknk1
ENSMUSG00000039384	Dusp10
ENSMUSG00000072770	Acrbp
ENSMUSG00000024858	Adrbk1
ENSMUSG00000032370	Lactb
ENSMUSG00000074277	Phldb3
ENSMUSG00000026596	Abl2
ENSMUSG00000042700	Sipa1l1
ENSMUSG00000016206	H2-M3
ENSMUSG00000030726	Pold3
ENSMUSG00000027940	Tpm3
ENSMUSG00000022519	Srl
ENSMUSG00000025037	Maoa
ENSMUSG00000020407	Upp1
ENSMUSG00000030276	Ttll3
ENSMUSG00000030074	Gxylt2
ENSMUSG00000097887	Gm26542
ENSMUSG00000048277	Syngr2
ENSMUSG00000001630	Stk38l
ENSMUSG00000036948	BC037034
ENSMUSG00000015143	Actn1
ENSMUSG00000039738	Slx4
ENSMUSG00000051344	Plekhm3
ENSMUSG00000027335	Adra1d
ENSMUSG00000024349	Tmem173
ENSMUSG00000000149	Gna12
ENSMUSG00000025870	Arl10
ENSMUSG00000032258	Lca5
ENSMUSG00000030678	Maz
ENSMUSG00000078700	D030028A08Rik
ENSMUSG00000036764	Dnajc12
ENSMUSG00000011884	Gltp
ENSMUSG00000028497	Ptplad2
ENSMUSG00000034807	Colgalt1
ENSMUSG00000041079	Rwdd2b
ENSMUSG00000060147	Serpinb6a
ENSMUSG00000004270	Lpcat3
ENSMUSG00000028378	Ptgr1
ENSMUSG00000036985	Zdhhc9
ENSMUSG00000042834	Nrep
ENSMUSG00000003062	Stard3nl
ENSMUSG00000029591	Ung
ENSMUSG00000007617	Homer1
ENSMUSG00000038383	Pigu
ENSMUSG00000059674	Cdh24
ENSMUSG00000038172	Ttc39b
ENSMUSG00000041075	Fzd7
ENSMUSG00000097354	2310001H17Rik
ENSMUSG00000079505	Gm11131
ENSMUSG00000070462	Mesdc1
ENSMUSG00000034342	Cbl
ENSMUSG00000019951	Uhrf1bp1l
ENSMUSG00000090963	Gm17655
ENSMUSG00000024270	Slc39a6
ENSMUSG00000040616	Tmem51
ENSMUSG00000019433	Gipc1
ENSMUSG00000029687	Ezh2
ENSMUSG00000054203	Ifi205
ENSMUSG00000003484	Cyp4f18
ENSMUSG00000026158	Ogfrl1
ENSMUSG00000070427	Il18bp
ENSMUSG00000031832	Taf1c
ENSMUSG00000036820	Amdhd2
ENSMUSG00000025612	Bach1
ENSMUSG00000002210	Smg9
ENSMUSG00000035929	H2-Q4
ENSMUSG00000037805	Rpl10a
ENSMUSG00000038332	Sesn1
ENSMUSG00000059796	Eif4a1
ENSMUSG00000069520	Tmem19
ENSMUSG00000027435	Cd93
ENSMUSG00000004891	Nes
ENSMUSG00000049191	Rgag4
ENSMUSG00000034656	Cacna1a
ENSMUSG00000005481	Ddx39
ENSMUSG00000090137	Uba52
ENSMUSG00000036438	Calm2
ENSMUSG00000050105	Grrp1
ENSMUSG00000060791	Gmfg
ENSMUSG00000070372	Capza1
ENSMUSG00000084166	Gm6451
ENSMUSG00000054408	Spcs3
ENSMUSG00000022438	Parvb
ENSMUSG00000034685	Fam171a2
ENSMUSG00000043953	Ccrl2
ENSMUSG00000033706	Smyd5
ENSMUSG00000023259	Slc26a6
ENSMUSG00000004233	Wars2
ENSMUSG00000009545	Kcnq1
ENSMUSG00000020973	Dnaaf2
ENSMUSG00000035898	Uba6
ENSMUSG00000036412	Arsi
ENSMUSG00000004100	Ppan
ENSMUSG00000022378	Fam49b
ENSMUSG00000007613	Tgfbr1
ENSMUSG00000023068	Nus1
ENSMUSG00000028066	Pmf1
ENSMUSG00000024777	Ppp2r5b
ENSMUSG00000045282	Tmem86b
ENSMUSG00000040010	Slc7a5
ENSMUSG00000024747	Aldh1a7
ENSMUSG00000039883	Lrrc17
ENSMUSG00000032244	Fem1b
ENSMUSG00000028136	Snx27
ENSMUSG00000024817	Uhrf2
ENSMUSG00000057789	Bak1
ENSMUSG00000028689	Ccdc163
ENSMUSG00000026864	Hspa5
ENSMUSG00000039202	Abhd2
ENSMUSG00000035673	Sbno2
ENSMUSG00000018861	Fdxr
ENSMUSG00000079491	H2-T10
ENSMUSG00000040188	Scamp2
ENSMUSG00000052298	Cdc42se2
ENSMUSG00000021133	4933426M11Rik
ENSMUSG00000032740	Ccdc88a
ENSMUSG00000039529	Atp8b1
ENSMUSG00000020228	Helb
ENSMUSG00000079426	Arpc4
ENSMUSG00000038764	Ptpn3
[truncated: 1,390 more rows]

## Sheet: Fig5A_edgeR_Cre+HFDvsNC_sigDOWN
GENEID	SYMBOL
ENSMUSG00000027568	Ntsr1
ENSMUSG00000047230	Cldn2
ENSMUSG00000031881	Cdh16
ENSMUSG00000040205	Cuzd1
ENSMUSG00000027376	Prom2
ENSMUSG00000018623	Mmp7
ENSMUSG00000020679	Hnf1b
ENSMUSG00000076652	Ighv7-3
ENSMUSG00000028976	Slc2a5
ENSMUSG00000022262	Dnah5
ENSMUSG00000053153	Spag16
ENSMUSG00000042096	Dao
ENSMUSG00000047021	Ccdc108
ENSMUSG00000022449	Adamts20
ENSMUSG00000069873	4930438A08Rik
ENSMUSG00000036123	Slc9a3
ENSMUSG00000029151	Slc30a3
ENSMUSG00000061718	Ppp1r1b
ENSMUSG00000031449	Atp4b
ENSMUSG00000034227	Foxj1
ENSMUSG00000044393	Dsg2
ENSMUSG00000050866	Clrn3
ENSMUSG00000039552	Rsph4a
ENSMUSG00000032034	Kcnj5
ENSMUSG00000007034	Slc44a4
ENSMUSG00000034467	Dynlrb2
ENSMUSG00000041907	Gpr45
ENSMUSG00000026415	Fcamr
ENSMUSG00000095642	Ighv14-3
ENSMUSG00000045394	Epcam
ENSMUSG00000041323	Ak7
ENSMUSG00000001225	Slc26a3
ENSMUSG00000025479	Cyp2e1
ENSMUSG00000091575	2010016I18Rik
ENSMUSG00000056752	Dnah9
ENSMUSG00000047129	1700113H08Rik
ENSMUSG00000094356	Igkv8-28
ENSMUSG00000071550	Wdr52
ENSMUSG00000022376	Adcy8
ENSMUSG00000060311	Mucl1
ENSMUSG00000029420	Rimbp2
ENSMUSG00000028359	Orm3
ENSMUSG00000033998	Kcnk1
ENSMUSG00000033615	Cplx1
ENSMUSG00000030935	Acsm3
ENSMUSG00000044378	Slc15a5
ENSMUSG00000042788	Fam166b
ENSMUSG00000058147	Xlr3c
ENSMUSG00000095130	Ighv1-39
ENSMUSG00000030492	Slc7a9
ENSMUSG00000022949	Clic6
ENSMUSG00000094872	Igkv9-120
ENSMUSG00000018126	Baiap2l2
ENSMUSG00000005320	Fgfr4
ENSMUSG00000033590	Myo5c
ENSMUSG00000046215	Rprml
ENSMUSG00000061780	Cfd
ENSMUSG00000031204	Asb12
ENSMUSG00000022759	4930451C15Rik
ENSMUSG00000034427	Myo15b
ENSMUSG00000035686	Thrsp
ENSMUSG00000025497	Cdhr5
ENSMUSG00000016200	Syt14
ENSMUSG00000076676	Ighv12-3
ENSMUSG00000030757	Zkscan2
ENSMUSG00000043168	4930426D05Rik
ENSMUSG00000087638	Gm11773
ENSMUSG00000027559	Car3
ENSMUSG00000096108	Ighv11-2
ENSMUSG00000038403	Hfe2
ENSMUSG00000075023	Accsl
ENSMUSG00000033419	Snap91
ENSMUSG00000079654	Prrt4
ENSMUSG00000086587	Gm11837
ENSMUSG00000031980	Agt
ENSMUSG00000056133	Gm9992
ENSMUSG00000025013	Tll2
ENSMUSG00000090486	BC035947
ENSMUSG00000005251	Ripk4
ENSMUSG00000057068	Fam47e
ENSMUSG00000076671	Ighv13-1
ENSMUSG00000027513	Pck1
ENSMUSG00000031298	Gpr64
ENSMUSG00000028177	1810013D15Rik
ENSMUSG00000020090	Npffr1
ENSMUSG00000015090	Ptgds
ENSMUSG00000097098	9330111N05Rik
ENSMUSG00000048442	Smim5
ENSMUSG00000086332	4930480G23Rik
ENSMUSG00000081683	Fzd10
ENSMUSG00000012187	Mogat1
ENSMUSG00000097021	4933433G15Rik
ENSMUSG00000032327	Stra6
ENSMUSG00000022763	Aifm3
ENSMUSG00000052629	Gm9885
ENSMUSG00000029093	Sorcs2
ENSMUSG00000031489	Adrb3
ENSMUSG00000048424	Ranbp3l
ENSMUSG00000048142	Nat8l
ENSMUSG00000021509	Slc25a48
ENSMUSG00000054162	Spock3
ENSMUSG00000087612	A230005M16Rik
ENSMUSG00000000402	Egfl6
ENSMUSG00000020125	Elane
ENSMUSG00000063415	Cyp26b1
ENSMUSG00000076940	Iglv2
ENSMUSG00000022996	Wnt10b
ENSMUSG00000071531	Gprin2
ENSMUSG00000022512	Cldn1
ENSMUSG00000087166	L1td1
ENSMUSG00000001420	Tmem79
ENSMUSG00000097910	5033428I22Rik
ENSMUSG00000060093	Hist1h4a
ENSMUSG00000085185	BC028777
ENSMUSG00000073530	Pappa2
ENSMUSG00000079462	Gm15737
ENSMUSG00000032492	Pth1r
ENSMUSG00000073680	Tmem88b
ENSMUSG00000045215	Asxl3
ENSMUSG00000009670	Tex11
ENSMUSG00000022803	Popdc2
ENSMUSG00000068522	Aard
ENSMUSG00000009216	Fam163b
ENSMUSG00000026387	Sctr
ENSMUSG00000067786	Nnat
ENSMUSG00000050447	Lypd6
ENSMUSG00000018648	Dusp14
ENSMUSG00000025175	Fn3k
ENSMUSG00000032268	Tmprss5
ENSMUSG00000039257	Vstm2b
ENSMUSG00000030972	Acsm5
ENSMUSG00000006784	Ttc25
ENSMUSG00000054662	Ano9
ENSMUSG00000031461	Myom2
ENSMUSG00000035984	Nme5
ENSMUSG00000038167	Plekhg6
ENSMUSG00000028836	Slc30a2
ENSMUSG00000021416	Eci3
ENSMUSG00000032482	Cspg5
ENSMUSG00000024302	Dtna
ENSMUSG00000027556	Car1
ENSMUSG00000040653	Ppp1r14c
ENSMUSG00000048038	4932418E24Rik
ENSMUSG00000090785	Gm17116
ENSMUSG00000085445	Gm16348
ENSMUSG00000052117	D630039A03Rik
ENSMUSG00000099094	RP24-364K9.3
ENSMUSG00000019817	Plagl1
ENSMUSG00000090667	Gm765
ENSMUSG00000051648	Kctd19
ENSMUSG00000035095	Fam167a
ENSMUSG00000042707	Dnali1
ENSMUSG00000027901	Dennd2d
ENSMUSG00000097613	Gm17597
ENSMUSG00000012705	Retn
ENSMUSG00000041220	Elovl6
ENSMUSG00000026567	Adcy10
ENSMUSG00000038496	Slc19a3
ENSMUSG00000053441	Adamts19
ENSMUSG00000039021	Ttc16
ENSMUSG00000032680	6820408C15Rik
ENSMUSG00000072966	Gprasp2
ENSMUSG00000006538	Ihh
ENSMUSG00000032452	Clstn2
ENSMUSG00000048899	Rimkla
ENSMUSG00000073988	Ttpa
ENSMUSG00000093405	Gm20684
ENSMUSG00000074264	Amy1
ENSMUSG00000028024	Enpep
ENSMUSG00000030317	Timp4
ENSMUSG00000051504	Siglech
ENSMUSG00000031853	BC021891
ENSMUSG00000085721	Gm12796
ENSMUSG00000086149	Gm15598
ENSMUSG00000029712	Actl6b
ENSMUSG00000068877	Selenbp2
ENSMUSG00000042616	Oscp1
ENSMUSG00000039628	Hs3st6
ENSMUSG00000038064	Cldn22
ENSMUSG00000026173	Plcd4
ENSMUSG00000049571	9330101J02Rik
ENSMUSG00000050035	Fhl4
ENSMUSG00000047787	Flrt1
ENSMUSG00000074607	Tox2
ENSMUSG00000030688	Stard10
ENSMUSG00000039323	Igfbp2
ENSMUSG00000038522	AI317395
ENSMUSG00000043088	Il17re
ENSMUSG00000087648	E130018N17Rik
ENSMUSG00000054889	Dsp
ENSMUSG00000079465	Col4a3
ENSMUSG00000020532	Acaca
ENSMUSG00000078487	Ankrd65
ENSMUSG00000097222	1010001N08Rik
ENSMUSG00000037989	Wnk2
ENSMUSG00000072884	Gm10433
ENSMUSG00000044716	Dok7
ENSMUSG00000086726	Gm9458
ENSMUSG00000025478	Dpysl4
ENSMUSG00000047261	Gap43
ENSMUSG00000016194	Hsd11b1
ENSMUSG00000027075	Slc43a1
ENSMUSG00000039037	St6galnac5
ENSMUSG00000034871	Fam151a
ENSMUSG00000029370	Rassf6
ENSMUSG00000031972	Acta1
ENSMUSG00000044694	2010007H06Rik
ENSMUSG00000019851	Perp
ENSMUSG00000025375	Aatk
ENSMUSG00000039518	Cdsn
ENSMUSG00000027796	Smad9
ENSMUSG00000027315	Spint1
ENSMUSG00000049670	Morn4
ENSMUSG00000049241	Gpr81
ENSMUSG00000057173	Rfx8
ENSMUSG00000026525	Opn3
ENSMUSG00000085071	Gm14066
ENSMUSG00000085207	Gm11767
ENSMUSG00000085218	BB218582
ENSMUSG00000068876	Cgn
ENSMUSG00000073929	Trim30e-ps1
ENSMUSG00000030519	Apba2
ENSMUSG00000097527	1700112J16Rik
ENSMUSG00000050854	Tmem125
ENSMUSG00000079355	Ackr4
ENSMUSG00000050737	Ptges
ENSMUSG00000090039	Gm15894
ENSMUSG00000025934	Gsta3
ENSMUSG00000078868	Gm14412
ENSMUSG00000034818	Celf5
ENSMUSG00000042258	Isl1
ENSMUSG00000040473	A330021E22Rik
ENSMUSG00000024803	Ankrd1
ENSMUSG00000027840	Wnt2b
ENSMUSG00000005268	Prlr
ENSMUSG00000054200	Ffar4
ENSMUSG00000050640	Tmem150c
ENSMUSG00000079429	Mroh2a
ENSMUSG00000021957	Tkt
ENSMUSG00000045709	1700023L04Rik
ENSMUSG00000019368	Sec14l4
ENSMUSG00000035930	Chst4
ENSMUSG00000026062	Slc9a2
ENSMUSG00000087120	Gm12279
ENSMUSG00000040650	Cyp2b23
ENSMUSG00000035355	Kcnh4
ENSMUSG00000078314	Gm14762
ENSMUSG00000029211	Gabra4
ENSMUSG00000050587	Lrrc4c
ENSMUSG00000045259	Klhdc9
ENSMUSG00000024076	Vit
ENSMUSG00000018566	Slc2a4
ENSMUSG00000097379	Gm26873
ENSMUSG00000078612	1700024P16Rik
ENSMUSG00000041750	Cd1d2
ENSMUSG00000088307	Gm24505
ENSMUSG00000024558	Mapk4
ENSMUSG00000032092	Mpzl2
ENSMUSG00000023918	Gpr115
ENSMUSG00000038665	Dgki
ENSMUSG00000028020	Glrb
ENSMUSG00000067158	Col4a4
ENSMUSG00000035783	Acta2
ENSMUSG00000050276	Mrgprg
ENSMUSG00000041878	8430432A02Rik
ENSMUSG00000035773	Kiss1r
ENSMUSG00000021763	BC067074
ENSMUSG00000068740	Celsr2
ENSMUSG00000040037	Negr1
ENSMUSG00000025537	Phkg1
ENSMUSG00000085133	B930095G15Rik
ENSMUSG00000035105	Egln3
ENSMUSG00000056973	Ces1d
ENSMUSG00000026765	Lypd6b
ENSMUSG00000037362	Nov
ENSMUSG00000085998	AW822252
ENSMUSG00000017639	Rab11fip4
ENSMUSG00000030664	1110006G14Rik
ENSMUSG00000034532	Fbxo16
ENSMUSG00000029431	B3gnt4
ENSMUSG00000067276	Capn6
ENSMUSG00000021255	Esrrb
ENSMUSG00000073295	Nudt11
ENSMUSG00000078451	Ppil6
ENSMUSG00000084960	B430010I23Rik
ENSMUSG00000031230	Fgf16
ENSMUSG00000086417	Gm12996
ENSMUSG00000085984	1700001G11Rik
ENSMUSG00000041301	Cftr
ENSMUSG00000097146	Gm4211
ENSMUSG00000000305	Cdh4
ENSMUSG00000097767	Miat
ENSMUSG00000027446	9230104L09Rik
ENSMUSG00000071847	Apcdd1
ENSMUSG00000049382	Krt8
ENSMUSG00000097123	Gm6297
ENSMUSG00000040649	Rimklb
ENSMUSG00000072624	Gm5460
ENSMUSG00000037709	Fam13a
ENSMUSG00000042357	Gjb5
ENSMUSG00000021069	Pygl
ENSMUSG00000074517	Gm10710
ENSMUSG00000027223	Mapk8ip1
ENSMUSG00000013928	Thap8
ENSMUSG00000033059	Pygb
ENSMUSG00000043623	4933412A08Rik
ENSMUSG00000074472	Zfp872
ENSMUSG00000052135	Foxo6
ENSMUSG00000095789	Nupr1l
ENSMUSG00000049086	Bmyc
ENSMUSG00000085776	5430402O13Rik
ENSMUSG00000085095	Gm15635
ENSMUSG00000030513	Pcsk6
ENSMUSG00000017300	Tnnc2
ENSMUSG00000022861	Dgkg
ENSMUSG00000029847	2010107G12Rik
ENSMUSG00000038576	Susd4
ENSMUSG00000012819	Cdh23
ENSMUSG00000057766	Ankrd29
ENSMUSG00000097124	A530020G20Rik
ENSMUSG00000029499	Pxmp2
ENSMUSG00000025207	Sema4g
ENSMUSG00000050875	A730017C20Rik
ENSMUSG00000059173	Pde1a
ENSMUSG00000085881	Gm15912
ENSMUSG00000097636	5830416P10Rik
ENSMUSG00000085449	Gm15520
ENSMUSG00000074461	Gm10699
ENSMUSG00000043687	1190005I06Rik
ENSMUSG00000086216	Gm13610
ENSMUSG00000097016	Gm26708
ENSMUSG00000006542	Prkag3
ENSMUSG00000097013	Gm26710
ENSMUSG00000020364	Zfp354a
ENSMUSG00000012396	Nanog
ENSMUSG00000024039	Cbs
ENSMUSG00000085151	1110018N20Rik
ENSMUSG00000030806	Stx1b
ENSMUSG00000025279	Dnase1l3
ENSMUSG00000087535	Zmiz1os1
ENSMUSG00000050994	Adgb
ENSMUSG00000022132	Cldn10
ENSMUSG00000020917	Acly
ENSMUSG00000028782	Bai2
ENSMUSG00000043999	Gpr75
ENSMUSG00000050663	Trhde
ENSMUSG00000070717	Gm10300
ENSMUSG00000038193	Hand2
ENSMUSG00000033849	B3galt2
ENSMUSG00000027257	Pacsin3
ENSMUSG00000032348	Gsta4
ENSMUSG00000038618	Rassf7
ENSMUSG00000048826	Dact2
ENSMUSG00000035283	Adrb1
ENSMUSG00000041423	Paqr6
ENSMUSG00000063428	Ddo
ENSMUSG00000046160	Olig1
ENSMUSG00000029859	Epha1
ENSMUSG00000097777	Gm16794
ENSMUSG00000040136	Abcc8
ENSMUSG00000026051	1500015O10Rik
ENSMUSG00000086382	Gm13705
ENSMUSG00000024500	Ppp2r2b
ENSMUSG00000034258	Mfsd7c
ENSMUSG00000086746	Gm15222
ENSMUSG00000027221	Chst1
ENSMUSG00000021991	Cacna2d3
ENSMUSG00000030905	Crym
ENSMUSG00000028150	Rorc
ENSMUSG00000097276	4930525G20Rik
ENSMUSG00000086544	Gm13704
ENSMUSG00000086358	Gm13270
ENSMUSG00000027792	Bche
ENSMUSG00000085084	4930570G19Rik
ENSMUSG00000037259	Dzank1
ENSMUSG00000027238	Frmd5
ENSMUSG00000068452	Duox2
ENSMUSG00000040998	Npnt
ENSMUSG00000026576	Atp1b1
ENSMUSG00000025153	Fasn
ENSMUSG00000020173	Cobl
ENSMUSG00000090145	Ugt1a6b
ENSMUSG00000031351	Zfp185
ENSMUSG00000085408	C530005A16Rik
ENSMUSG00000029869	Ephb6
ENSMUSG00000053398	Phgdh
ENSMUSG00000073460	Pnldc1
ENSMUSG00000023043	Krt18
ENSMUSG00000020911	Krt19
ENSMUSG00000042379	Esm1
ENSMUSG00000034285	Nipsnap1
ENSMUSG00000035615	Frmpd1
ENSMUSG00000062563	Cys1
ENSMUSG00000035829	Ppp1r26
ENSMUSG00000097702	Gm26739
ENSMUSG00000087445	Gm14286
ENSMUSG00000085743	8430419K02Rik
ENSMUSG00000049092	Gpr137c
ENSMUSG00000085282	Gm15663
ENSMUSG00000037738	Nek5
ENSMUSG00000038600	Atp6v0a4
ENSMUSG00000045284	Dcaf12l1
ENSMUSG00000034570	Inpp5j
ENSMUSG00000089941	Gm16168
ENSMUSG00000015957	Wnt11
ENSMUSG00000097236	4831440E17Rik
ENSMUSG00000072769	Gm10419
ENSMUSG00000040612	Ildr2
ENSMUSG00000034910	Pygo1
ENSMUSG00000028392	Bspry
ENSMUSG00000033805	Ephx4
ENSMUSG00000078866	Gm14420
ENSMUSG00000029086	Prom1
ENSMUSG00000095040	1700001J03Rik
ENSMUSG00000097573	G730003C15Rik
ENSMUSG00000043644	0610009L18Rik
ENSMUSG00000031111	Igsf1
ENSMUSG00000063727	Tnfrsf11b
ENSMUSG00000024053	Emilin2
ENSMUSG00000025813	Homer2
ENSMUSG00000037225	Fgf2
ENSMUSG00000035504	Reep6
ENSMUSG00000087651	1500009L16Rik
ENSMUSG00000087373	Gm15892
ENSMUSG00000086350	B230369F24Rik
ENSMUSG00000089783	Gm454
ENSMUSG00000004814	Ccl24
ENSMUSG00000031910	Has3
ENSMUSG00000035818	Plekhs1
ENSMUSG00000097383	1500026H17Rik
ENSMUSG00000056486	Chn1
ENSMUSG00000063430	Wscd2
ENSMUSG00000018868	Pnpla5
ENSMUSG00000027574	Nkain4
ENSMUSG00000060402	Chst8
ENSMUSG00000049313	Sorl1
ENSMUSG00000044724	Gpr152
ENSMUSG00000051844	B230319C09Rik
ENSMUSG00000052852	Reep1
ENSMUSG00000036411	9530077C05Rik
ENSMUSG00000068762	Gstm6
ENSMUSG00000024990	Rbp4
ENSMUSG00000020010	Vnn3
ENSMUSG00000003949	Hlf
ENSMUSG00000044349	Snhg11
ENSMUSG00000085914	Gm14320
ENSMUSG00000061451	Tmem151a
ENSMUSG00000097892	Gm26801
ENSMUSG00000054204	Fam150b
ENSMUSG00000085990	Gm16731
ENSMUSG00000008999	Bmp7
ENSMUSG00000038236	Hoxa7
ENSMUSG00000029419	Gm996
ENSMUSG00000087390	Gm7598
ENSMUSG00000098221	Gm27030
ENSMUSG00000038486	Sv2a
ENSMUSG00000031845	Bcmo1
ENSMUSG00000044320	1700001O22Rik
ENSMUSG00000097150	Gm26513
ENSMUSG00000097574	C920006O11Rik
ENSMUSG00000024593	Megf10
ENSMUSG00000086287	Gm15972
ENSMUSG00000032420	Nt5e
ENSMUSG00000018554	Ybx2
ENSMUSG00000060530	A930017M01Rik
ENSMUSG00000031636	Pdlim3
ENSMUSG00000075590	Nrbp2
ENSMUSG00000069713	4933406P04Rik
ENSMUSG00000055546	Timd4
ENSMUSG00000054423	Cadps
ENSMUSG00000025370	Cdh9
ENSMUSG00000035275	Raver2
ENSMUSG00000033208	S100b
ENSMUSG00000046607	Hrk
ENSMUSG00000078143	Gm17344
ENSMUSG00000056445	5730446D14Rik
ENSMUSG00000048240	Gng7
ENSMUSG00000097462	9530026P05Rik
ENSMUSG00000097187	Gm19426
ENSMUSG00000038347	Tcte2
ENSMUSG00000028601	Echdc2
ENSMUSG00000027536	Chmp4c
ENSMUSG00000030246	Ldhb
ENSMUSG00000056899	Immp2l
ENSMUSG00000041202	Pla2g2d
ENSMUSG00000032584	Mst1r
ENSMUSG00000024842	Cabp4
ENSMUSG00000087336	Gm15860
ENSMUSG00000068463	B630019A10Rik
ENSMUSG00000058914	C1qtnf3
ENSMUSG00000055027	Smyd1
ENSMUSG00000074521	Gm14327
ENSMUSG00000073888	Ccl27a
ENSMUSG00000022878	Adipoq
ENSMUSG00000026834	Acvr1c
ENSMUSG00000001773	Folh1
ENSMUSG00000060445	Sycp2
ENSMUSG00000097416	Gm26670
ENSMUSG00000096946	Gm10474
ENSMUSG00000032131	Abcg4
ENSMUSG00000040896	Kcnd3
ENSMUSG00000030114	Klrg1
ENSMUSG00000047420	Fam180a
ENSMUSG00000039629	Strip2
ENSMUSG00000004558	Ndrg2
ENSMUSG00000069515	Lyz1
ENSMUSG00000067649	Mageb18
ENSMUSG00000087307	Gm12925
ENSMUSG00000081648	Gm13423
ENSMUSG00000053414	Hunk
ENSMUSG00000022987	Zfp641
ENSMUSG00000004110	Cacna1e
ENSMUSG00000002032	Tmem25
ENSMUSG00000097047	1110020A21Rik
ENSMUSG00000086914	Gm16124
ENSMUSG00000025815	Dhtkd1
ENSMUSG00000052392	Acot4
ENSMUSG00000037833	Sh2d4b
ENSMUSG00000054320	Lrrc36
ENSMUSG00000066687	Zbtb16
ENSMUSG00000091154	1700024N20Rik
ENSMUSG00000039976	Tbc1d16
ENSMUSG00000045031	Cetn4
ENSMUSG00000031434	Morc4
ENSMUSG00000024526	Cidea
ENSMUSG00000020566	Atp6v1c2
ENSMUSG00000028860	Sytl1
ENSMUSG00000020672	Sntg2
ENSMUSG00000086495	Gm13778
ENSMUSG00000079669	Gm17396
ENSMUSG00000092124	B930094E09Rik
ENSMUSG00000061100	Retnla
ENSMUSG00000031700	Gpt2
ENSMUSG00000078350	Smim1
ENSMUSG00000039865	Slc44a3
ENSMUSG00000073600	Prob1
ENSMUSG00000043488	Gm9783
ENSMUSG00000025255	Zfhx4
ENSMUSG00000081249	Gm11517
ENSMUSG00000016995	Matn4
ENSMUSG00000032942	Ucp3
ENSMUSG00000039611	Tmem246
ENSMUSG00000027784	Ppm1l
ENSMUSG00000030701	Plekhb1
ENSMUSG00000032898	Fbxo21
ENSMUSG00000094910	D430019H16Rik
ENSMUSG00000028871	Rspo1
ENSMUSG00000019856	Fam184a
ENSMUSG00000087611	4930458D05Rik
ENSMUSG00000024935	Slc1a1
ENSMUSG00000033308	Dpyd
ENSMUSG00000028487	Bnc2
ENSMUSG00000026827	Gpd2
ENSMUSG00000000197	Nalcn
ENSMUSG00000084512	Gm22482
ENSMUSG00000020325	Fstl3
ENSMUSG00000020990	Cdkl1
ENSMUSG00000048772	Tmem53
ENSMUSG00000074219	Gm10644
ENSMUSG00000096039	D830030K20Rik
ENSMUSG00000090235	Gm16244
ENSMUSG00000071984	Fndc1
ENSMUSG00000031373	Car5b
ENSMUSG00000048794	Ccdc37
ENSMUSG00000037315	Phf16
ENSMUSG00000040714	Klc3
ENSMUSG00000058153	Sez6l
ENSMUSG00000038453	Srcin1
ENSMUSG00000092192	Dyx1c1
ENSMUSG00000046314	Stxbp6
ENSMUSG00000054863	Fam19a5
ENSMUSG00000086881	Gm13594
ENSMUSG00000061882	Ccdc62
ENSMUSG00000074743	Thbd
ENSMUSG00000005836	Gata6
ENSMUSG00000034171	Faah
ENSMUSG00000021136	Smoc1
ENSMUSG00000016028	Celsr1
ENSMUSG00000039103	Nexn
ENSMUSG00000065592	Mir145
ENSMUSG00000085962	Gm16984
ENSMUSG00000022044	Stmn4
ENSMUSG00000068874	Selenbp1
ENSMUSG00000041261	Car8
ENSMUSG00000059146	Ntrk3
ENSMUSG00000044361	BC024139
ENSMUSG00000097162	2310010J17Rik
ENSMUSG00000035121	Neil2
ENSMUSG00000001985	Grik3
ENSMUSG00000005360	Slc1a3
ENSMUSG00000037664	Cdkn1c
ENSMUSG00000032338	Hcn4
ENSMUSG00000038859	Baiap2l1
ENSMUSG00000035407	Kank4
ENSMUSG00000092335	Gm7221
ENSMUSG00000020183	Cpm
ENSMUSG00000085260	1700013G23Rik
ENSMUSG00000097885	5031434O11Rik
ENSMUSG00000042873	Lhfpl4
ENSMUSG00000036131	Frmd7
ENSMUSG00000021573	Tppp
ENSMUSG00000006462	A530013C23Rik
ENSMUSG00000064202	4430402I18Rik
ENSMUSG00000042672	Dcst1
ENSMUSG00000098447	RP23-386K20.2
ENSMUSG00000042515	Mum1l1
ENSMUSG00000020286	1700093K21Rik
ENSMUSG00000073758	Sh3d21
ENSMUSG00000025185	Loxl4
ENSMUSG00000033715	Akr1c14
ENSMUSG00000055733	Nap1l3
ENSMUSG00000054659	Pm20d2
ENSMUSG00000086308	G630016G05Rik
ENSMUSG00000003526	Prodh
ENSMUSG00000034520	Gjc1
ENSMUSG00000035476	Tab3
ENSMUSG00000034768	Asb16
ENSMUSG00000028393	Alad
ENSMUSG00000087500	Gm12426
ENSMUSG00000020656	Grhl1
ENSMUSG00000097345	AA543186
ENSMUSG00000052572	Dlg2
ENSMUSG00000001520	Nrip2
ENSMUSG00000036611	Eepd1
ENSMUSG00000024065	Ehd3
ENSMUSG00000022330	Osr2
ENSMUSG00000057880	Abat
ENSMUSG00000020838	Slc6a4
ENSMUSG00000081189	Gm12725
ENSMUSG00000078234	Klhdc7a
ENSMUSG00000049907	Rasl11b
ENSMUSG00000039347	Atp6v0e2
ENSMUSG00000085828	Gm15612
ENSMUSG00000049676	Catsperg1
ENSMUSG00000087377	AV099323
ENSMUSG00000044405	Adig
ENSMUSG00000026090	2010300C02Rik
ENSMUSG00000019326	Aoc3
ENSMUSG00000028996	Rbp7
ENSMUSG00000027827	Kcnab1
ENSMUSG00000037112	Sik2
ENSMUSG00000000794	Kcnn3
ENSMUSG00000034810	Scn7a
ENSMUSG00000049404	Rarres1
ENSMUSG00000087221	BC037032
ENSMUSG00000018509	Cenpv
ENSMUSG00000051910	Sox6
ENSMUSG00000024430	Cabyr
ENSMUSG00000074771	Ankef1
ENSMUSG00000048814	Lonrf2
ENSMUSG00000037206	Islr
ENSMUSG00000053214	Gm9899
ENSMUSG00000023092	Fhl1
ENSMUSG00000087222	E030042O20Rik
ENSMUSG00000097339	Gm26671
ENSMUSG00000056214	Pard6g
ENSMUSG00000026986	Hnmt
ENSMUSG00000045569	Mc2r
ENSMUSG00000032246	Calml4
ENSMUSG00000024376	Epb4.1l4a
ENSMUSG00000023951	Vegfa
ENSMUSG00000042745	Id1
ENSMUSG00000035713	Usp35
ENSMUSG00000046329	Slc25a23
ENSMUSG00000061859	Inadl
ENSMUSG00000051606	2010001K21Rik
ENSMUSG00000063531	Sema3e
ENSMUSG00000043673	Kcns3
ENSMUSG00000020684	Rasl10b
ENSMUSG00000009376	Met
ENSMUSG00000028399	Ptprd
ENSMUSG00000029438	Bcl7a
ENSMUSG00000046714	Foxc2
ENSMUSG00000087405	Gm14232
ENSMUSG00000017491	Rarb
ENSMUSG00000034382	AI661453
ENSMUSG00000038060	Dlec1
ENSMUSG00000030319	Cand2
ENSMUSG00000031283	Chrdl1
ENSMUSG00000043633	Fam221b
ENSMUSG00000024033	Rsph1
ENSMUSG00000027896	Slc16a4
ENSMUSG00000026380	Tfcp2l1
ENSMUSG00000029636	Wasf3
ENSMUSG00000039903	Eva1c
ENSMUSG00000093577	Gm20632
ENSMUSG00000055493	Epm2a
ENSMUSG00000028681	Ptch2
ENSMUSG00000046733	Gprc5a
ENSMUSG00000040152	Thbs1
ENSMUSG00000083701	Gm4912
ENSMUSG00000026175	Vil1
ENSMUSG00000086448	9330162012Rik
ENSMUSG00000028637	Ccdc30
ENSMUSG00000087597	Gm15345
ENSMUSG00000024972	Lgals12
ENSMUSG00000085615	A330035P11Rik
ENSMUSG00000029095	Ablim2
ENSMUSG00000048960	Prex2
ENSMUSG00000032392	Parp16
ENSMUSG00000054556	Gm4876
ENSMUSG00000041653	Pnpla3
ENSMUSG00000051243	Islr2
ENSMUSG00000044365	Cxxc4
ENSMUSG00000030532	Hddc3
ENSMUSG00000044252	Osbpl1a
ENSMUSG00000056856	Jakmip3
ENSMUSG00000028125	Abca4
ENSMUSG00000029001	Fbxo44
ENSMUSG00000085112	A530072M11Rik
ENSMUSG00000082396	Zfp389
ENSMUSG00000049281	Scn3b
ENSMUSG00000006641	Slc5a6
ENSMUSG00000085169	Gm10785
ENSMUSG00000029861	Fam131b
ENSMUSG00000021974	Fgf9
ENSMUSG00000035863	Palm
ENSMUSG00000097032	4930539J05Rik
ENSMUSG00000097773	Gm10614
ENSMUSG00000028758	Kif17
ENSMUSG00000002012	Pnck
ENSMUSG00000010660	Plcd1
ENSMUSG00000059108	Ifitm6
ENSMUSG00000030787	Lyve1
ENSMUSG00000004032	Gstm5
ENSMUSG00000034282	Evpl
ENSMUSG00000003452	Bicd1
ENSMUSG00000035948	Acss3
ENSMUSG00000021209	Ppp4r4
ENSMUSG00000043498	9330132A10Rik
ENSMUSG00000020467	Efemp1
ENSMUSG00000046532	Ar
ENSMUSG00000001552	Jup
ENSMUSG00000025555	Farp1
ENSMUSG00000022197	Pdzd2
ENSMUSG00000043873	Chi3l7
ENSMUSG00000026664	Phyh
ENSMUSG00000030494	Rhpn2
ENSMUSG00000025347	Mettl7b
ENSMUSG00000036504	Phpt1
ENSMUSG00000051166	Eml5
ENSMUSG00000039620	6430573F11Rik
ENSMUSG00000044676	Zfp612
ENSMUSG00000030739	Myh14
ENSMUSG00000050556	Kcnb1
ENSMUSG00000063383	Zfp947
ENSMUSG00000025318	Jph3
ENSMUSG00000031299	Pdha1
ENSMUSG00000097970	Gm27028
ENSMUSG00000029272	Sult1e1
ENSMUSG00000033022	Cdo1
ENSMUSG00000020427	Igfbp3
ENSMUSG00000055704	Gm9978
ENSMUSG00000082031	Gm8097
ENSMUSG00000038936	Sccpdh
ENSMUSG00000028631	Kcnq4
ENSMUSG00000066842	Hmcn1
ENSMUSG00000027489	Necab3
ENSMUSG00000097617	Gm10687
ENSMUSG00000030353	Tead4
ENSMUSG00000086119	Gm2415
ENSMUSG00000032051	Fdx1
ENSMUSG00000034842	Art3
ENSMUSG00000021798	Ldb3
ENSMUSG00000040543	Pitpnm3
ENSMUSG00000032387	Rbpms2
ENSMUSG00000030849	Fgfr2
ENSMUSG00000026768	Itga8
ENSMUSG00000041737	Tmem45b
ENSMUSG00000020926	Adam11
ENSMUSG00000062785	Kcnc3
ENSMUSG00000006575	Rundc3a
ENSMUSG00000031994	Adamts8
ENSMUSG00000002475	Abhd3
ENSMUSG00000002831	Plin4
ENSMUSG00000038587	Akap12
ENSMUSG00000044080	S100a1
ENSMUSG00000021760	Gpx8
ENSMUSG00000031093	Dock11
ENSMUSG00000030671	Pde3b
ENSMUSG00000040938	Slc16a11
ENSMUSG00000056602	Fry
ENSMUSG00000091498	Mpc1-ps
ENSMUSG00000024901	Peli3
ENSMUSG00000001604	Tcea3
ENSMUSG00000044641	Pard6b
ENSMUSG00000097487	Ptges3l
ENSMUSG00000024371	C2
ENSMUSG00000022838	Eaf2
ENSMUSG00000041189	Chrnb1
ENSMUSG00000087579	1500017E21Rik
ENSMUSG00000071658	Gng3
ENSMUSG00000061603	Akap6
ENSMUSG00000022707	Gbe1
ENSMUSG00000031951	Tmem231
ENSMUSG00000055560	Zfp459
ENSMUSG00000091472	Gm3739
ENSMUSG00000060470	Gpr97
ENSMUSG00000085558	4930412C18Rik
ENSMUSG00000070280	Slc22a14
ENSMUSG00000057098	Ebf1
ENSMUSG00000022099	Dmtn
ENSMUSG00000050014	Apol10b
ENSMUSG00000067787	Blcap
ENSMUSG00000055137	5033411D12Rik
ENSMUSG00000072964	Bhlhb9
ENSMUSG00000021238	Aldh6a1
ENSMUSG00000028883	Sema3a
ENSMUSG00000075389	2810410L24Rik
ENSMUSG00000097204	Gm17690
ENSMUSG00000025776	Crispld1
ENSMUSG00000030584	Dpf1
ENSMUSG00000025407	Gli1
ENSMUSG00000084880	Gm14872
ENSMUSG00000062480	Acat3
ENSMUSG00000020044	Timp3
ENSMUSG00000064582	Gm25135
ENSMUSG00000087543	Gm16576
ENSMUSG00000025766	D3Ertd751e
ENSMUSG00000090952	Gm17251
ENSMUSG00000034858	Fam214a
ENSMUSG00000040254	Sema3d
ENSMUSG00000066553	Gm6969
ENSMUSG00000056418	BC043934
ENSMUSG00000023044	Csad
ENSMUSG00000037490	Slc2a12
ENSMUSG00000066057	Gm1976
ENSMUSG00000085956	4930481B07Rik
ENSMUSG00000027371	Fahd2a
ENSMUSG00000004035	Gstm7
ENSMUSG00000092569	Gm20544
ENSMUSG00000037440	Vnn1
ENSMUSG00000031490	Eif4ebp1
ENSMUSG00000032826	Ank2
ENSMUSG00000048218	Amigo2
ENSMUSG00000042613	Pbxip1
ENSMUSG00000043794	D830025C05Rik
ENSMUSG00000039137	Whrn
ENSMUSG00000042340	Ctf1
ENSMUSG00000031075	Ano1
ENSMUSG00000021032	Ngb
ENSMUSG00000096995	2810029C07Rik
ENSMUSG00000097728	Gm26840
ENSMUSG00000039004	Bmp6
ENSMUSG00000054966	Ifltd1
ENSMUSG00000035000	Dpp4
ENSMUSG00000053117	E330013P04Rik
ENSMUSG00000030340	Scnn1a
ENSMUSG00000020135	Apc2
ENSMUSG00000028445	Enho
ENSMUSG00000020847	Rph3al
ENSMUSG00000038570	Fam154b
ENSMUSG00000025069	Gsto2
ENSMUSG00000074466	Gm15417
ENSMUSG00000093402	Gm18588
ENSMUSG00000001948	Spa17
ENSMUSG00000048368	Omd
ENSMUSG00000097378	B230208H11Rik
ENSMUSG00000031327	Chic1
ENSMUSG00000071181	3830408C21Rik
ENSMUSG00000087574	C030037D09Rik
ENSMUSG00000002550	Uck1
ENSMUSG00000040170	Fmo2
ENSMUSG00000028259	Fhl5
ENSMUSG00000052942	Glis3
ENSMUSG00000030087	Klf15
ENSMUSG00000026255	Efhd1
ENSMUSG00000027316	Gfra4
ENSMUSG00000097284	4930480K23Rik
ENSMUSG00000039457	Ppl
ENSMUSG00000099034	RP24-289J12.1
ENSMUSG00000033722	BC034090
ENSMUSG00000045319	Proser2
ENSMUSG00000021567	Nkd2
ENSMUSG00000037994	Slc9b2
ENSMUSG00000017314	Mpp2
ENSMUSG00000020251	Glt8d2
ENSMUSG00000043833	2900005J15Rik
ENSMUSG00000032062	2310030G06Rik
ENSMUSG00000027861	Casq2
ENSMUSG00000014503	Pkd2l2
ENSMUSG00000039063	Echdc3
ENSMUSG00000039958	Mettl20
ENSMUSG00000087305	A430035B10Rik
ENSMUSG00000049858	Suox
ENSMUSG00000016458	Wt1
ENSMUSG00000021678	F2rl1
ENSMUSG00000005763	Cd247
ENSMUSG00000054855	Rnd1
ENSMUSG00000040105	Ppapdc2
ENSMUSG00000057246	BC051142
ENSMUSG00000046618	Olfml2a
ENSMUSG00000074796	Slc4a11
ENSMUSG00000023046	Igfbp6
ENSMUSG00000039196	Orm1
ENSMUSG00000038836	Agbl3
ENSMUSG00000055676	Gm5069
ENSMUSG00000071103	1700029J07Rik
ENSMUSG00000055980	Irs1
ENSMUSG00000032352	Lrrc1
ENSMUSG00000054474	Thnsl2
ENSMUSG00000039670	Oxld1
ENSMUSG00000030499	Kctd15
ENSMUSG00000033107	Rnf125
ENSMUSG00000003123	Lipe
ENSMUSG00000051890	Klhdc1
ENSMUSG00000042851	Zc3h6
ENSMUSG00000057729	Prtn3
ENSMUSG00000034573	Ptpn13
ENSMUSG00000038387	Rras
ENSMUSG00000028654	Mycl
ENSMUSG00000048490	Nrip1
ENSMUSG00000074227	Spint2
ENSMUSG00000001436	Slc19a1
ENSMUSG00000032251	Irak1bp1
ENSMUSG00000031273	Col4a6
ENSMUSG00000000154	Slc22a18
ENSMUSG00000064307	Lrrc51
ENSMUSG00000029469	Ift81
ENSMUSG00000001583	Tnk1
ENSMUSG00000097572	Gm26797
ENSMUSG00000023927	Satb1
ENSMUSG00000086679	Gm15551
ENSMUSG00000001657	Hoxc8
ENSMUSG00000037110	Ralgapa2
ENSMUSG00000031286	Glt28d2
ENSMUSG00000078716	Tmem8b
ENSMUSG00000038550	Gm129
ENSMUSG00000025911	Adhfe1
ENSMUSG00000005125	Ndrg1
ENSMUSG00000020889	Nr1d1
ENSMUSG00000038569	Rad9b
ENSMUSG00000040003	Magi2
ENSMUSG00000028076	Cd1d1
ENSMUSG00000039798	2600006K01Rik
ENSMUSG00000085696	2700086A05Rik
ENSMUSG00000040703	Cyp2s1
ENSMUSG00000042763	Maneal
ENSMUSG00000041144	Dnah7b
ENSMUSG00000060275	Nrg2
ENSMUSG00000029195	Klb
ENSMUSG00000028957	Per3
ENSMUSG00000079559	Gm684
ENSMUSG00000034361	Cpne2
ENSMUSG00000021265	Slc25a29
ENSMUSG00000060002	Chpt1
ENSMUSG00000026303	Mlph
ENSMUSG00000026384	Ptpn4
ENSMUSG00000028766	Alpl
ENSMUSG00000041426	Hibch
ENSMUSG00000086247	Gm15787
ENSMUSG00000047342	Zfp286
ENSMUSG00000093553	Gm20633
ENSMUSG00000038816	Ctnnal1
ENSMUSG00000028088	Fmo5
ENSMUSG00000026826	Nr4a2
ENSMUSG00000034551	Hdx
ENSMUSG00000045106	Ccdc73
ENSMUSG00000022485	Hoxc5
ENSMUSG00000068742	Cry2
ENSMUSG00000028080	Lrba
ENSMUSG00000091994	E130317F20Rik
ENSMUSG00000084968	Gm12743
ENSMUSG00000024727	Trpm6
ENSMUSG00000089875	Etohd2
ENSMUSG00000035045	Zc3h12b
ENSMUSG00000056427	Slit3
ENSMUSG00000050103	Agmo
ENSMUSG00000022223	Sdr39u1
ENSMUSG00000032609	Klhdc8b
ENSMUSG00000020303	Stc2
ENSMUSG00000037493	Cib2
ENSMUSG00000035642	Aamdc
ENSMUSG00000028949	Smarcd3
ENSMUSG00000034872	Gipc3
ENSMUSG00000044749	Abca6
ENSMUSG00000087429	Gm16235
ENSMUSG00000059027	9630013D21Rik
ENSMUSG00000035828	Pim3
ENSMUSG00000040147	Maob
ENSMUSG00000003070	Efna2
ENSMUSG00000063488	Zkscan7
ENSMUSG00000021835	Bmp4
ENSMUSG00000043993	2900052L18Rik
ENSMUSG00000064367	mt-Nd5
ENSMUSG00000020151	Ptprr
ENSMUSG00000078902	Gm14443
ENSMUSG00000018800	Abca5
ENSMUSG00000026688	Mgst3
ENSMUSG00000079467	Gm14966
ENSMUSG00000097327	E030030I06Rik
ENSMUSG00000026463	Atp2b4
ENSMUSG00000052928	Ctif
ENSMUSG00000097658	Gm16755
ENSMUSG00000020866	Cacna1g
ENSMUSG00000054978	Kbtbd13
ENSMUSG00000021097	Clmn
ENSMUSG00000026839	Upp2
ENSMUSG00000051652	Lrrc3
ENSMUSG00000033377	Palmd
ENSMUSG00000029752	Asns
ENSMUSG00000046761	Fam83h
ENSMUSG00000061751	Kalrn
ENSMUSG00000029053	Prkcz
ENSMUSG00000003617	Cp
ENSMUSG00000022231	Sema5a
ENSMUSG00000031937	Vstm5
ENSMUSG00000070583	Fv1
ENSMUSG00000035509	Fbxl21
ENSMUSG00000054181	A930012O16Rik
ENSMUSG00000021013	Ttc8
ENSMUSG00000005803	Sqrdl
ENSMUSG00000036395	Glb1l2
ENSMUSG00000044122	Proca1
ENSMUSG00000070315	4930581F22Rik
ENSMUSG00000047022	Mipol1
ENSMUSG00000085315	A430018G15Rik
ENSMUSG00000001761	Smo
ENSMUSG00000063765	Chadl
ENSMUSG00000052676	Zmat1
ENSMUSG00000030672	Mylpf
ENSMUSG00000055737	Ghr
ENSMUSG00000030170	Wnt5b
ENSMUSG00000038253	Hoxa5
ENSMUSG00000026170	Cyp27a1
ENSMUSG00000021340	Gpld1
ENSMUSG00000020190	Mknk2
ENSMUSG00000054150	Syne3
ENSMUSG00000060206	Zfp462
ENSMUSG00000025780	Itih5
ENSMUSG00000058934	Gm16176
ENSMUSG00000021466	Ptch1
ENSMUSG00000086677	Gm12284
ENSMUSG00000051851	Cxx1c
ENSMUSG00000049690	Nckap5
ENSMUSG00000025795	Rassf3
ENSMUSG00000049811	Fam161a
ENSMUSG00000098132	Rassf10
ENSMUSG00000048445	Ccdc57
ENSMUSG00000046318	Ccbe1
ENSMUSG00000015850	Adamtsl4
ENSMUSG00000054021	Sirt5
ENSMUSG00000048138	Dmrt2
ENSMUSG00000047528	Als2cr12
ENSMUSG00000087259	2610035D17Rik
ENSMUSG00000032702	Kank1
ENSMUSG00000038886	Man2a2
ENSMUSG00000090164	BC035044
ENSMUSG00000062312	Erbb2
ENSMUSG00000074793	Hspa12b
ENSMUSG00000033065	Pfkm
ENSMUSG00000054545	Ugt1a6a
ENSMUSG00000022469	Rapgef3
ENSMUSG00000085793	Lin52
ENSMUSG00000025271	Pfkfb1
ENSMUSG00000027508	Pag1
ENSMUSG00000045555	Mettl24
ENSMUSG00000097867	1110054M08Rik
ENSMUSG00000021474	Sfxn1
ENSMUSG00000062980	Cped1
ENSMUSG00000046230	Vps13a
ENSMUSG00000053411	Cbx7
ENSMUSG00000032965	Ift57
ENSMUSG00000020131	Pcsk4
ENSMUSG00000047242	Taf9b
ENSMUSG00000030711	Sult1a1
ENSMUSG00000037541	Shank2
ENSMUSG00000033906	Zdhhc15
ENSMUSG00000029126	Nsg1
ENSMUSG00000035944	Ttc38
ENSMUSG00000032850	Rnft2
ENSMUSG00000041794	Myrip
ENSMUSG00000028565	Nfia
ENSMUSG00000069806	Cacng7
ENSMUSG00000029772	Ahcyl2
ENSMUSG00000057614	Gnai1
ENSMUSG00000086013	Gm15706
ENSMUSG00000001507	Itga3
ENSMUSG00000005947	Itgae
ENSMUSG00000041828	Abca8a
ENSMUSG00000038807	Rap1gap2
ENSMUSG00000020620	Abca8b
ENSMUSG00000037003	Tenc1
ENSMUSG00000087403	2900056M20Rik
ENSMUSG00000054931	Zkscan4
ENSMUSG00000026187	Xrcc5
ENSMUSG00000045007	Tubg2
ENSMUSG00000043154	Ppp2r3a
ENSMUSG00000020019	Ntn4
ENSMUSG00000029828	4921507P07Rik
ENSMUSG00000029830	Svopl
ENSMUSG00000085287	4833418N02Rik
ENSMUSG00000097730	Gm26588
ENSMUSG00000040006	Ginm1
ENSMUSG00000022884	Eif4a2
ENSMUSG00000019997	Ctgf
ENSMUSG00000033917	Gde1
ENSMUSG00000051984	Sec31b
ENSMUSG00000059395	Nkapl
ENSMUSG00000050965	Prkca
ENSMUSG00000070490	Gm10293
ENSMUSG00000042320	Prox2
ENSMUSG00000030029	Lrig1
ENSMUSG00000036111	Lmo1
ENSMUSG00000063060	Sox7
ENSMUSG00000030095	Tmem43
ENSMUSG00000079659	Tmem243
ENSMUSG00000046447	Camk2n1
ENSMUSG00000029999	Tgfa
ENSMUSG00000022389	Tef
ENSMUSG00000027676	Ccdc39
ENSMUSG00000023150	Ivns1abp
ENSMUSG00000087143	A830082K12Rik
ENSMUSG00000017740	Slc12a5
ENSMUSG00000097601	Gm26660
ENSMUSG00000052373	Mpp3
ENSMUSG00000042942	Greb1l
ENSMUSG00000097787	2700046G09Rik
ENSMUSG00000061126	Cyp4f39
ENSMUSG00000004631	Sgce
ENSMUSG00000033763	Mtss1l
ENSMUSG00000047786	Lix1
ENSMUSG00000032289	Thsd4
ENSMUSG00000047963	Stbd1
ENSMUSG00000008348	Ubc
ENSMUSG00000032186	Tmod2
ENSMUSG00000089889	0610040B10Rik
ENSMUSG00000014245	Pigl
ENSMUSG00000042087	4933440N22Rik
ENSMUSG00000039166	Akap7
ENSMUSG00000089774	Slc5a3
ENSMUSG00000042246	Tmc7
ENSMUSG00000097174	Gm4890
ENSMUSG00000032649	Colgalt2
ENSMUSG00000022836	Mylk
ENSMUSG00000029359	Tesc
ENSMUSG00000040213	Ccbl2
ENSMUSG00000023861	Mpc1
ENSMUSG00000070997	1700055D18Rik
ENSMUSG00000086158	Gm5918
ENSMUSG00000020836	Coro6
ENSMUSG00000038259	Gdf5
ENSMUSG00000072875	Gpr27
ENSMUSG00000004947	Dtx2
ENSMUSG00000034936	Arl4d
ENSMUSG00000034981	Parm1
ENSMUSG00000038700	Hoxb5
ENSMUSG00000027332	Ivd
ENSMUSG00000001739	Cldn15
ENSMUSG00000037712	Fermt2
ENSMUSG00000027890	Gstm4
ENSMUSG00000072653	Zfp783
ENSMUSG00000040181	Fmo1
ENSMUSG00000025477	Inpp5a
ENSMUSG00000056900	Usp13
ENSMUSG00000078719	Msmp
ENSMUSG00000022843	Clcn2
ENSMUSG00000087138	Gm15545
ENSMUSG00000071226	Cecr2
ENSMUSG00000097747	Gm26534
ENSMUSG00000037606	Osbpl5
ENSMUSG00000086889	Gm8619
ENSMUSG00000027510	Rbm38
ENSMUSG00000027353	Mcm8
ENSMUSG00000032827	Ppp1r9a
ENSMUSG00000016493	Cd46
ENSMUSG00000000934	Top1mt
ENSMUSG00000056476	Med12l
ENSMUSG00000025170	Rab40b
ENSMUSG00000051335	Gfod1
ENSMUSG00000030313	Dennd5b
ENSMUSG00000030600	Lrfn1
ENSMUSG00000029165	Agbl5
ENSMUSG00000020331	Hcn2
ENSMUSG00000021273	Fdft1
ENSMUSG00000050666	Vstm4
ENSMUSG00000058254	Tspan7
ENSMUSG00000025545	Clybl
ENSMUSG00000097167	Gm16740
ENSMUSG00000022257	Laptm4b
ENSMUSG00000027858	Tspan2
ENSMUSG00000021375	Kif13a
ENSMUSG00000039953	Clstn1
ENSMUSG00000049265	Kcnk3
ENSMUSG00000001039	B9d1
ENSMUSG00000032340	Neo1
ENSMUSG00000017969	Ptgis
ENSMUSG00000021087	Rtn1
ENSMUSG00000000126	Wnt9a
ENSMUSG00000030337	Vamp1
ENSMUSG00000032067	Pts
ENSMUSG00000024186	Rgs11
ENSMUSG00000028701	Lurap1
ENSMUSG00000087413	Gm11266
ENSMUSG00000020937	Plcd3
ENSMUSG00000034829	Nxnl1
ENSMUSG00000095253	Zfp799
ENSMUSG00000035456	Prdm8
ENSMUSG00000075254	Heg1
ENSMUSG00000003531	Dgcr6
ENSMUSG00000050931	Sgms2
ENSMUSG00000064370	mt-Cytb
ENSMUSG00000049038	Mterfd3
ENSMUSG00000075394	Hoxc4
ENSMUSG00000090622	A930033H14Rik
ENSMUSG00000086725	A630052C17Rik
ENSMUSG00000023328	Ache
ENSMUSG00000070867	Trabd2b
ENSMUSG00000069835	Sat2
ENSMUSG00000035232	Pdk3
ENSMUSG00000021411	Pxdc1
ENSMUSG00000035245	Eogt
ENSMUSG00000005514	Por
ENSMUSG00000092035	Peg10
ENSMUSG00000027500	Stmn2
ENSMUSG00000039763	Dnajc28
ENSMUSG00000017734	Dbndd2
ENSMUSG00000080893	Gm15920
ENSMUSG00000097643	A130051J06Rik
ENSMUSG00000045636	Mtus1
ENSMUSG00000051022	Hs3st1
ENSMUSG00000053617	Sh3pxd2a
ENSMUSG00000062012	Zfp13
ENSMUSG00000028653	Trit1
ENSMUSG00000026883	Dab2ip
ENSMUSG00000039601	Rcan2
ENSMUSG00000032118	Fez1
ENSMUSG00000020846	Fam101b
ENSMUSG00000002346	Slc25a42
ENSMUSG00000008090	Fgfrl1
ENSMUSG00000001143	Lman2l
ENSMUSG00000006378	Gcat
ENSMUSG00000055639	Dach1
ENSMUSG00000050373	Snx21
ENSMUSG00000025104	Hdgfrp3
ENSMUSG00000024978	Gpam
ENSMUSG00000037736	Limch1
ENSMUSG00000008822	Acyp1
ENSMUSG00000035878	Hykk
ENSMUSG00000021094	Dhrs7
ENSMUSG00000055782	Abcd2
ENSMUSG00000047638	Nr1h4
ENSMUSG00000097131	D230017M19Rik
ENSMUSG00000041736	Tspo
ENSMUSG00000029335	Bmp3
ENSMUSG00000030255	Sspn
ENSMUSG00000037762	Slc16a9
ENSMUSG00000044033	Ccdc141
ENSMUSG00000038984	Tspyl5
ENSMUSG00000028427	Aqp7
ENSMUSG00000031534	Smim19
ENSMUSG00000003273	Car11
ENSMUSG00000098146	Gm26935
ENSMUSG00000031494	Cd209a
ENSMUSG00000038894	Irs2
ENSMUSG00000079168	Cd209g
ENSMUSG00000074862	BC025920
ENSMUSG00000002980	Bcam
ENSMUSG00000086877	A230072C01Rik
ENSMUSG00000020534	Shmt1
ENSMUSG00000054939	Zfp174
ENSMUSG00000054619	Mettl7a1
ENSMUSG00000041679	Lrrc29
ENSMUSG00000028573	Fggy
ENSMUSG00000067878	Mtap7d3
ENSMUSG00000026421	Csrp1
ENSMUSG00000071723	Gspt2
ENSMUSG00000021253	Tgfb3
ENSMUSG00000049791	Fzd4
ENSMUSG00000028347	Tmeff1
ENSMUSG00000055148	Klf2
ENSMUSG00000030782	Tgfb1i1
ENSMUSG00000027762	Sucnr1
ENSMUSG00000023052	Npff
ENSMUSG00000035342	Lzts2
ENSMUSG00000020988	L2hgdh
ENSMUSG00000021748	Pdhb
ENSMUSG00000028980	H6pd
ENSMUSG00000059824	Dbp
ENSMUSG00000055254	Ntrk2
ENSMUSG00000035258	Abi3bp
ENSMUSG00000042293	Gm5617
ENSMUSG00000026185	Igfbp5
ENSMUSG00000078607	1810010H24Rik
ENSMUSG00000036617	Etl4
ENSMUSG00000011382	Dhdh
ENSMUSG00000021846	Peli2
ENSMUSG00000074646	6430550D23Rik
ENSMUSG00000032527	Pccb
ENSMUSG00000061816	Myl1
ENSMUSG00000035936	Aldh5a1
ENSMUSG00000078566	Bnip3
ENSMUSG00000042549	Gm16516
ENSMUSG00000037086	1110059M19Rik
ENSMUSG00000071252	2210408I21Rik
ENSMUSG00000034949	Zfr2
ENSMUSG00000030753	Prkrir
ENSMUSG00000024253	Dync2li1
ENSMUSG00000039646	Vasn
ENSMUSG00000023262	Acy1
ENSMUSG00000022365	Derl1
ENSMUSG00000030917	Tmem159
ENSMUSG00000060487	Samd5
ENSMUSG00000097324	Mir143hg
ENSMUSG00000019768	Esr1
ENSMUSG00000033060	Lmo7
ENSMUSG00000087331	1810021B22Rik
ENSMUSG00000049107	Ntf3
ENSMUSG00000074171	Gm6658
ENSMUSG00000018169	Mfng
ENSMUSG00000039835	Nhsl1
ENSMUSG00000097494	4933406C10Rik
ENSMUSG00000040488	Ltbp4
ENSMUSG00000074579	Lekr1
ENSMUSG00000027016	Zfp385b
ENSMUSG00000057054	Inca1
ENSMUSG00000006958	Chrd
ENSMUSG00000053199	Arhgap20
ENSMUSG00000058246	Gm10037
ENSMUSG00000047821	Trim16
ENSMUSG00000052563	D930048N14Rik
ENSMUSG00000097343	9030407P20Rik
ENSMUSG00000083674	Zfp133-ps
ENSMUSG00000018740	Slc25a35
ENSMUSG00000027562	Car2
ENSMUSG00000044548	Dact1
ENSMUSG00000022546	Gpt
ENSMUSG00000053279	Aldh1a1
ENSMUSG00000030924	2610020H08Rik
ENSMUSG00000045573	Penk
ENSMUSG00000087165	2010001A14Rik
ENSMUSG00000003865	Gys1
ENSMUSG00000024168	Tmem204
ENSMUSG00000000340	Dbt
ENSMUSG00000018659	Pnpo
ENSMUSG00000097164	Ccdc41os1
ENSMUSG00000026489	Adck3
ENSMUSG00000060227	Casc4
ENSMUSG00000030498	Gas2
ENSMUSG00000061740	Cyp2d22
ENSMUSG00000038267	Slc22a23
ENSMUSG00000006464	Bbs1
ENSMUSG00000030256	Bhlhe41
ENSMUSG00000031495	Cd209d
ENSMUSG00000025262	Fam120c
ENSMUSG00000040410	Fbxl4
ENSMUSG00000047656	Trpt1
ENSMUSG00000056498	Tmem154
ENSMUSG00000032531	Amotl2
ENSMUSG00000034165	Ccnd3
ENSMUSG00000029633	Gm5578
ENSMUSG00000038930	Rccd1
ENSMUSG00000021775	Nr1d2
ENSMUSG00000072494	Ppp1r3e
ENSMUSG00000032425	Zfp949
ENSMUSG00000018378	Cuedc1
ENSMUSG00000078435	AU041133
ENSMUSG00000062960	Kdr
ENSMUSG00000040022	Rab11fip2
ENSMUSG00000097750	Gm4673
ENSMUSG00000028469	Npr2
ENSMUSG00000023826	Park2
ENSMUSG00000048537	Phldb1
ENSMUSG00000085042	2010001M06Rik
ENSMUSG00000002688	Prkd1
ENSMUSG00000031723	Txnl4b
ENSMUSG00000007805	Twist2
ENSMUSG00000033278	Ptprm
ENSMUSG00000055745	Ldoc1l
ENSMUSG00000042797	Aqp11
ENSMUSG00000043384	Gprasp1
ENSMUSG00000041688	Amot
ENSMUSG00000039826	Trub2
ENSMUSG00000046798	Cldn12
ENSMUSG00000033068	Entpd6
ENSMUSG00000078867	Gm14418
ENSMUSG00000032184	Lysmd2
ENSMUSG00000086784	Isoc2a
ENSMUSG00000018411	Mapt
ENSMUSG00000022090	Pdlim2
ENSMUSG00000047617	BC029214
ENSMUSG00000097855	A930007I19Rik
ENSMUSG00000054582	Pabpc1l
ENSMUSG00000001663	Gstt1
ENSMUSG00000033256	Shf
ENSMUSG00000014791	Elmo3
ENSMUSG00000027327	1700037H04Rik
ENSMUSG00000068747	Sort1
ENSMUSG00000028358	Zfp618
ENSMUSG00000014776	Nol3
ENSMUSG00000084910	C630043F03Rik
ENSMUSG00000063698	Sfxn4
ENSMUSG00000021699	Pde4d
ENSMUSG00000022324	Matn2
ENSMUSG00000021662	Arhgef28
ENSMUSG00000024998	Plce1
ENSMUSG00000074024	4632427E13Rik
ENSMUSG00000036885	Arhgef26
ENSMUSG00000042857	Gm9776
ENSMUSG00000020902	Ntn1
ENSMUSG00000039765	Cc2d2a
ENSMUSG00000030621	Me3
ENSMUSG00000028017	Egf
ENSMUSG00000001918	Slc1a5
ENSMUSG00000025738	Fbxl16
ENSMUSG00000029833	Trim24
ENSMUSG00000024597	Slc12a2
ENSMUSG00000054074	Skida1
ENSMUSG00000038425	Poli
ENSMUSG00000072969	Armcx5
ENSMUSG00000025764	Phf17
ENSMUSG00000048731	Ggnbp1
ENSMUSG00000048078	Tenm4
ENSMUSG00000040811	Eml2
ENSMUSG00000048387	Osr1
ENSMUSG00000075289	Carns1
ENSMUSG00000061313	Ddhd2
ENSMUSG00000019986	Ahi1
ENSMUSG00000026923	Notch1
ENSMUSG00000028944	Prkag2
ENSMUSG00000022018	Rgcc
ENSMUSG00000044167	Foxo1
ENSMUSG00000094786	Gm14403
ENSMUSG00000028600	Podn
ENSMUSG00000052698	Tln2
ENSMUSG00000061510	Gm10101
ENSMUSG00000025731	0610011F06Rik
ENSMUSG00000072915	Gm12258
ENSMUSG00000024845	Tmem134
ENSMUSG00000026879	Gsn
ENSMUSG00000020580	Rock2
ENSMUSG00000033152	Podxl2
ENSMUSG00000097290	1300002E11Rik
ENSMUSG00000039236	Isg20
ENSMUSG00000027165	B230118H07Rik
ENSMUSG00000031379	Pir
ENSMUSG00000064358	mt-Co3
ENSMUSG00000026495	Efcab2
ENSMUSG00000085175	Gm11423
ENSMUSG00000041548	Hspb8
ENSMUSG00000075588	Hoxb2
ENSMUSG00000070738	Dgkd
ENSMUSG00000037098	Rab11fip3
ENSMUSG00000032309	Fbxo22
ENSMUSG00000030124	Lag3
ENSMUSG00000054057	A930004D18Rik
ENSMUSG00000045257	Morn2
ENSMUSG00000040043	Rbms2
ENSMUSG00000044017	Gpr133
ENSMUSG00000027378	Nphp1
ENSMUSG00000000142	Axin2
ENSMUSG00000025608	Podxl
ENSMUSG00000021597	Ankrd32
ENSMUSG00000087269	D330023K18Rik
ENSMUSG00000007989	Fzd3
ENSMUSG00000032066	Bco2
ENSMUSG00000070705	Eid2b
ENSMUSG00000030872	Gga2
ENSMUSG00000087424	5730405O15Rik
ENSMUSG00000087381	Gm16008
ENSMUSG00000031996	Aplp2
ENSMUSG00000041734	Kirrel
ENSMUSG00000031605	Klhl2
ENSMUSG00000039795	Zfand1
ENSMUSG00000007097	Atp1a2
ENSMUSG00000056832	Ttc26
ENSMUSG00000064363	mt-Nd4
ENSMUSG00000074207	Adh1
ENSMUSG00000035835	BC005764
ENSMUSG00000032456	Nmnat3
ENSMUSG00000048232	Fbxo10
ENSMUSG00000024395	Lims2
ENSMUSG00000073062	Zxdb
ENSMUSG00000074766	Ism1
ENSMUSG00000024501	Dpysl3
ENSMUSG00000035900	Gramd4
ENSMUSG00000014773	Dll1
ENSMUSG00000048478	Spata33
ENSMUSG00000028218	Fam92a
ENSMUSG00000062054	Iah1
ENSMUSG00000023755	Rhebl1
ENSMUSG00000036661	Dennd3
ENSMUSG00000022390	Zc3h7b
ENSMUSG00000028861	Mrps15
ENSMUSG00000057181	5730455P16Rik
ENSMUSG00000042810	Krba1
ENSMUSG00000074918	5430417L22Rik
ENSMUSG00000026399	Cd55
ENSMUSG00000034848	Ttc21b
ENSMUSG00000085396	6720401G13Rik
ENSMUSG00000046312	AI464131
ENSMUSG00000057176	Gm166
ENSMUSG00000027495	Fam210b
ENSMUSG00000096974	Gm26881
ENSMUSG00000020154	Ptprb
ENSMUSG00000034245	Hdac11
ENSMUSG00000051736	Fam229b
ENSMUSG00000039253	Fn3krp
ENSMUSG00000038393	Txnip
ENSMUSG00000033486	Catsper2
ENSMUSG00000019791	Hint3
ENSMUSG00000034158	Lrrc58
ENSMUSG00000010911	Apip
ENSMUSG00000040272	Accs
ENSMUSG00000028532	Cachd1
ENSMUSG00000006642	Tcf23
ENSMUSG00000078185	Chml
ENSMUSG00000020963	Tshr
ENSMUSG00000062646	Ganc
ENSMUSG00000019732	Calr3
ENSMUSG00000047409	Ctdspl
ENSMUSG00000048647	Exd1
ENSMUSG00000019820	Utrn
ENSMUSG00000036158	Prickle1
ENSMUSG00000032125	Robo4
ENSMUSG00000032841	Prr5l
ENSMUSG00000031523	Dlc1
ENSMUSG00000020674	Pxdn
ENSMUSG00000069114	Zbtb10
ENSMUSG00000026278	Bok
ENSMUSG00000033585	Ndn
ENSMUSG00000026604	Ptpn14
ENSMUSG00000032135	Mcam
ENSMUSG00000000811	Txnrd3
ENSMUSG00000035473	Galm
ENSMUSG00000038967	Pdk2
ENSMUSG00000047330	Kcne4
ENSMUSG00000022982	Sod1
ENSMUSG00000035637	Grhpr
ENSMUSG00000047454	Gphn
ENSMUSG00000037005	Xpnpep2
ENSMUSG00000087594	BC039771
ENSMUSG00000027357	Crls1
ENSMUSG00000033416	Gucd1
ENSMUSG00000051586	Mical3
ENSMUSG00000054945	Gm9958
ENSMUSG00000038914	Dido1
ENSMUSG00000038344	Txlng
ENSMUSG00000022505	Emp2
ENSMUSG00000027428	Rbbp9
ENSMUSG00000028476	Reck
ENSMUSG00000031196	F8
ENSMUSG00000041957	Pkp2
ENSMUSG00000087231	E230016M11Rik
ENSMUSG00000049115	Agtr1a
ENSMUSG00000097353	A430046D13Rik
ENSMUSG00000030861	Acadsb
ENSMUSG00000031618	Nr3c2
ENSMUSG00000028085	Pet112
ENSMUSG00000055866	Per2
ENSMUSG00000028496	Mllt3
ENSMUSG00000050248	Evc2
ENSMUSG00000003721	Insig2
ENSMUSG00000049657	Zbtb5
ENSMUSG00000026944	Abca2
ENSMUSG00000009394	Syn2
ENSMUSG00000047246	Hist1h2be
ENSMUSG00000056698	Elmod3
ENSMUSG00000087497	2810001G20Rik
ENSMUSG00000015843	Rxrg
ENSMUSG00000024913	Lrp5
ENSMUSG00000027961	Lrrc39
ENSMUSG00000030546	Plin1
ENSMUSG00000037032	Apbb1
ENSMUSG00000051977	Prdm9
ENSMUSG00000027318	Adam33
ENSMUSG00000020357	Flt4
ENSMUSG00000000325	Arvcf
ENSMUSG00000036817	Sun1
ENSMUSG00000087088	Gm16638
ENSMUSG00000030554	Synm
ENSMUSG00000044317	Gpr4
ENSMUSG00000046727	Cystm1
ENSMUSG00000021388	Aspn
ENSMUSG00000071654	AI462493
ENSMUSG00000059327	Eda
ENSMUSG00000024921	Smarca2
ENSMUSG00000054519	Zfp867
ENSMUSG00000028541	B4galt2
ENSMUSG00000070304	Scn2b
ENSMUSG00000069833	Ahnak
ENSMUSG00000026017	Carf
ENSMUSG00000038354	Ankrd35
ENSMUSG00000031750	Il34
ENSMUSG00000006445	Epha2
ENSMUSG00000024601	Isoc1
ENSMUSG00000061838	Suclg2
ENSMUSG00000084808	9430091E24Rik
ENSMUSG00000003378	Grik5
ENSMUSG00000084844	Hoxb3os
ENSMUSG00000020993	Trappc6b
ENSMUSG00000033855	Ston1
ENSMUSG00000033170	Card10
ENSMUSG00000038949	Cnst
ENSMUSG00000031563	Wwc2
ENSMUSG00000042284	Itga1
ENSMUSG00000020682	Mmp28
ENSMUSG00000028470	Hint2
ENSMUSG00000037826	Ppm1k
ENSMUSG00000004098	Col5a3
ENSMUSG00000090150	Acad11
ENSMUSG00000037406	Htra4
ENSMUSG00000049288	Lix1l
ENSMUSG00000025791	Pgm2
ENSMUSG00000006930	Hap1
ENSMUSG00000020614	Fam20a
ENSMUSG00000063894	Zkscan8
ENSMUSG00000024962	Vegfb
ENSMUSG00000005534	Insr
ENSMUSG00000037787	Apopt1
ENSMUSG00000027583	Zbtb46
ENSMUSG00000021646	Mccc2
ENSMUSG00000044068	Zrsr1
ENSMUSG00000052911	Lamb2
ENSMUSG00000022337	Emc2
ENSMUSG00000037138	Aff3
ENSMUSG00000001891	Ugp2
ENSMUSG00000078861	Zfp931
ENSMUSG00000016918	Sulf1
ENSMUSG00000035126	Wdr78
ENSMUSG00000022292	Rrm2b
ENSMUSG00000056492	Gpr116
ENSMUSG00000020284	1810043G02Rik
ENSMUSG00000071856	Mcc
ENSMUSG00000023348	Trip6
ENSMUSG00000039782	Cpeb2
ENSMUSG00000045103	Dmd
ENSMUSG00000044328	Trp53i13
ENSMUSG00000097309	Gm17249
ENSMUSG00000063972	Nr6a1
ENSMUSG00000023089	Ndufa5
ENSMUSG00000020689	Itgb3
ENSMUSG00000047250	Ptgs1
ENSMUSG00000039853	Trim14
ENSMUSG00000022610	Mapk12
ENSMUSG00000019809	Pex3
ENSMUSG00000029096	Htra3
ENSMUSG00000040121	Rep15
ENSMUSG00000045954	Sdpr
ENSMUSG00000016552	Foxred2
ENSMUSG00000002781	Tmem143
ENSMUSG00000041120	Nbl1
ENSMUSG00000023921	Mut
ENSMUSG00000021902	Phf7
ENSMUSG00000030878	Cdr2
ENSMUSG00000024431	Nr3c1
ENSMUSG00000048406	B330016D10Rik
ENSMUSG00000028407	2010003O02Rik
ENSMUSG00000030231	Plekha5
ENSMUSG00000052539	Magi3
ENSMUSG00000020653	Klf11
ENSMUSG00000034194	R3hcc1
ENSMUSG00000048915	Efna5
ENSMUSG00000066684	Pilrb1
ENSMUSG00000085037	4933421O10Rik
ENSMUSG00000034371	Dak
ENSMUSG00000029456	Acad10
ENSMUSG00000031749	St3gal2
ENSMUSG00000015568	Lpl
ENSMUSG00000015357	Clpx
ENSMUSG00000047866	Lonp2
ENSMUSG00000030323	Ift122
ENSMUSG00000030516	Tjp1
ENSMUSG00000084925	1810062O18Rik
ENSMUSG00000049807	Arhgap23
ENSMUSG00000025372	Baiap2
ENSMUSG00000022555	Dgat1
ENSMUSG00000022940	Pigp
ENSMUSG00000041650	Pcca
ENSMUSG00000032006	Pdgfd
ENSMUSG00000033707	Lrrc24
ENSMUSG00000041429	Nthl1
ENSMUSG00000042961	Egflam
ENSMUSG00000037379	Spon2
ENSMUSG00000071757	Zhx2
ENSMUSG00000032280	Tle3
ENSMUSG00000021559	Dapk1
ENSMUSG00000031227	Magee1
ENSMUSG00000020069	Hnrnph3
ENSMUSG00000022837	Iqcb1
ENSMUSG00000033233	Trim45
ENSMUSG00000020359	Phykpl
ENSMUSG00000024645	Timm21
ENSMUSG00000022306	Zfpm2
ENSMUSG00000039943	Plcb4
ENSMUSG00000023266	Frs3
ENSMUSG00000024646	Cyb5
ENSMUSG00000075585	6330403L08Rik
ENSMUSG00000026721	Rabgap1l
ENSMUSG00000036206	Sh3bp4
ENSMUSG00000037710	Cisd1
ENSMUSG00000021066	Atl1
ENSMUSG00000055407	Map6
ENSMUSG00000026678	Rgs5
ENSMUSG00000005611	Mrvi1
ENSMUSG00000074682	Zcchc3
ENSMUSG00000020160	Meis1
ENSMUSG00000050714	Zbtb26
ENSMUSG00000008845	Cd163
ENSMUSG00000043487	Acot6
ENSMUSG00000073427	Gm4924
ENSMUSG00000052632	Asap2
ENSMUSG00000025504	Eps8l2
ENSMUSG00000032839	Trpc1
ENSMUSG00000027999	Pla2g12a
ENSMUSG00000034308	Sdr42e1
ENSMUSG00000063015	Ccni
ENSMUSG00000037007	Zfp113
ENSMUSG00000039478	Micu3
ENSMUSG00000032216	Nedd4
ENSMUSG00000015224	Cyp2j9
ENSMUSG00000061130	Ppm1b
ENSMUSG00000026492	Tfb2m
ENSMUSG00000028683	Eif2b3
ENSMUSG00000079164	Tlr5
ENSMUSG00000020741	Cluh
ENSMUSG00000086629	2810403D21Rik
ENSMUSG00000028518	Prkaa2
ENSMUSG00000039929	Urb1
ENSMUSG00000020601	Trib2
ENSMUSG00000029094	Afap1
ENSMUSG00000025656	Arhgef9
ENSMUSG00000022661	Cd200
ENSMUSG00000044937	BC030307
ENSMUSG00000022466	Rpap3
ENSMUSG00000038235	F11r
ENSMUSG00000028551	Cdkn2c
ENSMUSG00000064351	mt-Co1
ENSMUSG00000013622	Atraid
ENSMUSG00000009905	Kdsr
ENSMUSG00000037972	Snn
ENSMUSG00000029673	Auts2
ENSMUSG00000010476	Ebf3
ENSMUSG00000067424	Zfp563
ENSMUSG00000090394	4930523C07Rik
ENSMUSG00000069743	Zfp820
ENSMUSG00000022323	Hrsp12
ENSMUSG00000033902	Mapkbp1
ENSMUSG00000020176	Grb10
ENSMUSG00000028104	Polr3gl
ENSMUSG00000072704	2700089E24Rik
ENSMUSG00000017774	Myo1c
ENSMUSG00000050627	Gpd1l
ENSMUSG00000059811	Atl2
ENSMUSG00000067430	Zfp763
ENSMUSG00000026860	Sh3glb2
ENSMUSG00000027198	Ext2
ENSMUSG00000033249	Hsf4
ENSMUSG00000051811	Cox6b2
ENSMUSG00000002908	Kcnn1
ENSMUSG00000039239	Tgfb2
ENSMUSG00000026004	Kansl1l
ENSMUSG00000087589	D430040D24Rik
ENSMUSG00000041961	Znrf3
ENSMUSG00000003809	Gcdh
ENSMUSG00000030247	Kcnj8
ENSMUSG00000021745	Ptprg
ENSMUSG00000031776	Arl2bp
ENSMUSG00000022747	St3gal6
ENSMUSG00000007872	Id3
ENSMUSG00000030960	Mettl10
ENSMUSG00000051041	Olfml1
ENSMUSG00000020604	Arsg
ENSMUSG00000062352	Itgb1bp1
ENSMUSG00000041235	Chd7
ENSMUSG00000032009	Sesn3
ENSMUSG00000037316	Bag4
ENSMUSG00000007867	Ift43
ENSMUSG00000074384	AI429214
ENSMUSG00000034903	Cobll1
ENSMUSG00000021007	Spata7
ENSMUSG00000015094	Npdc1
ENSMUSG00000030515	Tarsl2
ENSMUSG00000033526	Ppip5k1
ENSMUSG00000020105	Lrig3
ENSMUSG00000015053	Gata2
ENSMUSG00000026510	Trp53bp2
ENSMUSG00000029761	Cald1
ENSMUSG00000030094	Xpc
ENSMUSG00000028483	Snapc3
ENSMUSG00000004105	Angptl2
ENSMUSG00000031985	Gnpat
ENSMUSG00000042190	Cmklr1
ENSMUSG00000041343	Ankrd42
ENSMUSG00000047907	Tshz2
ENSMUSG00000006931	Leprel4
ENSMUSG00000039382	Wdr45
ENSMUSG00000021376	Tpmt
ENSMUSG00000032946	Rasgrp2
ENSMUSG00000004187	Kifc2
ENSMUSG00000053080	2700081O15Rik
ENSMUSG00000035640	Dos
ENSMUSG00000042647	Acad12
ENSMUSG00000062591	Tubb4a
ENSMUSG00000045691	Thtpa
ENSMUSG00000024667	Tmem216
ENSMUSG00000093661	Eif4e3
ENSMUSG00000078201	Tmem203
ENSMUSG00000021047	Nova1
ENSMUSG00000047632	Fgfbp3
ENSMUSG00000022701	2610015P09Rik
ENSMUSG00000018678	Sp2
ENSMUSG00000031290	Lrch2
ENSMUSG00000005397	Nid1
ENSMUSG00000018750	Zbtb4
ENSMUSG00000024948	Map4k2
ENSMUSG00000041777	Cir1
ENSMUSG00000022178	Ajuba
ENSMUSG00000050730	Arhgap42
ENSMUSG00000000439	Mkrn2
ENSMUSG00000073236	2500004C02Rik
ENSMUSG00000033361	Prrg3
ENSMUSG00000071253	Slc25a16
ENSMUSG00000035764	Fbxo45
ENSMUSG00000034557	Zfyve9
ENSMUSG00000022848	Dirc2
ENSMUSG00000065987	Cd209b
ENSMUSG00000073633	Fbxo36
ENSMUSG00000046491	C1qtnf2
ENSMUSG00000038180	Spag4
ENSMUSG00000030309	Caprin2
ENSMUSG00000006576	Slc4a3
ENSMUSG00000022235	Cmbl
ENSMUSG00000025933	Tmem14a
ENSMUSG00000033577	Myo6
ENSMUSG00000055538	Zcchc24
ENSMUSG00000044968	Napepld
ENSMUSG00000062619	2310039H08Rik
ENSMUSG00000060510	Zfp266
ENSMUSG00000022297	Fzd6
ENSMUSG00000022236	Ropn1l
ENSMUSG00000024232	Bambi
ENSMUSG00000050270	Tmem220
ENSMUSG00000034640	Tiparp
ENSMUSG00000041992	Rapgef5
ENSMUSG00000069727	Gm5595
ENSMUSG00000030189	Ybx3
ENSMUSG00000092274	Neat1
ENSMUSG00000078695	Cisd3
ENSMUSG00000097616	1110019D14Rik
ENSMUSG00000026649	1700009P17Rik
ENSMUSG00000039197	Adk
ENSMUSG00000054708	Ankrd24
ENSMUSG00000036879	Phkb
ENSMUSG00000079560	Hoxa3
ENSMUSG00000033910	Gucy1a3
ENSMUSG00000060803	Gstp1
ENSMUSG00000085622	3110056K07Rik
ENSMUSG00000023495	Pcbp4
ENSMUSG00000049321	Zfp2
ENSMUSG00000097287	D130017N08Rik
ENSMUSG00000018604	Tbx3
ENSMUSG00000031565	Fgfr1
ENSMUSG00000024866	Acy3
ENSMUSG00000047067	Dusp28
ENSMUSG00000019846	Lama4
ENSMUSG00000040289	Hey1
ENSMUSG00000039701	Usp53
ENSMUSG00000027439	Gzf1
ENSMUSG00000050930	Map10
ENSMUSG00000042312	S100a13
ENSMUSG00000020744	Slc25a19
ENSMUSG00000022092	Ppp3cc
ENSMUSG00000028756	Pink1
ENSMUSG00000030022	Adamts9
ENSMUSG00000039496	Cdnf
ENSMUSG00000019320	Noxo1
ENSMUSG00000050697	Prkaa1
ENSMUSG00000055862	Izumo4
ENSMUSG00000068115	Ninl
ENSMUSG00000023960	Enpp5
ENSMUSG00000071454	Dtnb
ENSMUSG00000038170	Pde4dip
ENSMUSG00000068270	Shroom4
ENSMUSG00000038205	Prkab2
ENSMUSG00000027430	Dtd1
ENSMUSG00000045790	Ccdc149
ENSMUSG00000029263	Pigg
ENSMUSG00000039246	Lyplal1
ENSMUSG00000038291	Snx25
ENSMUSG00000031292	Cdkl5
ENSMUSG00000020380	Rad50
ENSMUSG00000021687	Scamp1
ENSMUSG00000042408	Zmym6
ENSMUSG00000039917	Rhbdd2
ENSMUSG00000057329	Bcl2
ENSMUSG00000044934	Zfp367
ENSMUSG00000018196	Glrx2
ENSMUSG00000006526	Tmem110
ENSMUSG00000046324	Ermp1
ENSMUSG00000045316	Fahd1
ENSMUSG00000034781	Gna11
ENSMUSG00000040297	Suco
ENSMUSG00000026858	Fam73b
ENSMUSG00000039254	Pomt1
ENSMUSG00000021785	Ngly1
ENSMUSG00000026558	Uck2
ENSMUSG00000033083	Tbc1d4
ENSMUSG00000029648	Flt1
ENSMUSG00000005951	Shpk
ENSMUSG00000033029	1700088E04Rik
ENSMUSG00000034135	Sik3
ENSMUSG00000024462	Gabbr1
ENSMUSG00000040591	1110051M20Rik
ENSMUSG00000017493	Igfbp4
ENSMUSG00000040669	Phc1
ENSMUSG00000075273	Ttc30b
ENSMUSG00000024098	Twsg1
ENSMUSG00000022722	Arl6
ENSMUSG00000055799	Tcf7l1
ENSMUSG00000030421	Uri1
ENSMUSG00000074733	5830428H23Rik
ENSMUSG00000021552	Gkap1
ENSMUSG00000051034	Zfp11
ENSMUSG00000021708	Rasgrf2
ENSMUSG00000050919	Zfp366
ENSMUSG00000055485	Soga1
ENSMUSG00000039157	Fam102a
ENSMUSG00000030306	Tmtc1
ENSMUSG00000035142	Nubpl
ENSMUSG00000036667	Fam115a
ENSMUSG00000050212	Eva1b
ENSMUSG00000037239	Spred3
ENSMUSG00000097729	2310015A10Rik
ENSMUSG00000057835	Zfp119a
ENSMUSG00000020577	Tspan13
ENSMUSG00000001323	Srr
ENSMUSG00000046808	Atp10d
ENSMUSG00000029312	Klhl8
ENSMUSG00000041134	Cyyr1
ENSMUSG00000030035	Wbp1
ENSMUSG00000027646	Src
ENSMUSG00000062929	Cfl2
ENSMUSG00000035133	Arhgap5
ENSMUSG00000038594	Cep85l
ENSMUSG00000031150	Ccdc120
ENSMUSG00000036106	Prr5
ENSMUSG00000050947	Amigo1
ENSMUSG00000031990	Jam3
ENSMUSG00000032050	Rdx
ENSMUSG00000066643	Wdr35
ENSMUSG00000028256	Odf2l
ENSMUSG00000057666	Gapdh
ENSMUSG00000033096	Apmap
ENSMUSG00000037643	Prkci
ENSMUSG00000073609	D2hgdh
ENSMUSG00000027799	Nbea
ENSMUSG00000032192	Gnb5
ENSMUSG00000025867	Cplx2
ENSMUSG00000032047	Acat1
ENSMUSG00000038302	Lace1
ENSMUSG00000033632	AW554918
ENSMUSG00000028743	Akr7a5
ENSMUSG00000035413	Tmem98
ENSMUSG00000040584	Abcb1a
ENSMUSG00000041132	N4bp2l1
ENSMUSG00000051331	Cacna1c
ENSMUSG00000074909	Ranbp6
ENSMUSG00000057156	Homez
ENSMUSG00000068036	Mllt4
ENSMUSG00000062604	Srpk2
ENSMUSG00000055707	Klhl26
ENSMUSG00000024177	Nme4
ENSMUSG00000029776	Hibadh
ENSMUSG00000040048	Ndufb10
ENSMUSG00000054723	Vmac
ENSMUSG00000042670	Immp1l
ENSMUSG00000024074	Crim1
ENSMUSG00000032114	Slc37a4
ENSMUSG00000029851	Fam115c
ENSMUSG00000028789	Adc
ENSMUSG00000032579	Hemk1
ENSMUSG00000020156	Mum1
ENSMUSG00000038637	Lrrc56
ENSMUSG00000051146	Camk2n2
ENSMUSG00000026490	Cdc42bpa
ENSMUSG00000015932	Dstn
ENSMUSG00000061887	Ssbp3
ENSMUSG00000022687	Boc
ENSMUSG00000023074	Mospd1
ENSMUSG00000045038	Prkce
ENSMUSG00000024805	Pcgf5
ENSMUSG00000025486	Sirt3
ENSMUSG00000039485	Tspyl4
ENSMUSG00000031538	Plat
ENSMUSG00000039018	Mtg1
ENSMUSG00000022994	Adcy6
ENSMUSG00000041153	Osgin2
ENSMUSG00000029403	Cdkl2
ENSMUSG00000030788	Rnf141
ENSMUSG00000083282	Ctsf
ENSMUSG00000057286	St6galnac2
ENSMUSG00000040123	Zmym5
ENSMUSG00000027219	Slc28a2
ENSMUSG00000022801	Lrch3
ENSMUSG00000040605	Bace2
ENSMUSG00000027589	Pcmtd2
ENSMUSG00000010721	Lmbr1
ENSMUSG00000041936	Agrn
[truncated: 950 more rows]

## Sheet: Fig5A_edgeR_Crepos_HFDvsNC_all
GENEID	SYMBOL	logFC	logCPM	F	PValue	FDR
ENSMUSG00000032492	Pth1r	-2.43485	4.91726	280.784	4.3096e-13	7.28667e-09
ENSMUSG00000034854	Mfsd12	2.41442	7.31311	233.537	2.32478e-12	1.96537e-08
ENSMUSG00000032643	Fhl3	1.65286	4.494	199.426	9.67936e-12	5.45529e-08
ENSMUSG00000034910	Pygo1	-1.39783	2.77584	187.965	1.64428e-11	6.95039e-08
ENSMUSG00000017754	Pltp	2.11828	9.62135	177.652	2.71801e-11	6.97108e-08
ENSMUSG00000045216	Hs6st1	1.21453	6.17165	176.456	2.88606e-11	6.97108e-08
ENSMUSG00000046711	Hmga1	2.28677	5.6133	180.689	2.52418e-11	6.97108e-08
ENSMUSG00000026321	Tnfrsf11a	2.56991	5.08947	175.465	3.45612e-11	7.3045e-08
ENSMUSG00000018167	Stard3	0.963885	5.29178	167.3	4.62593e-11	8.69058e-08
ENSMUSG00000029919	Hpgds	3.63974	6.06841	163.101	7.16486e-11	1.1013e-07
ENSMUSG00000042616	Oscp1	-2.02382	3.48417	160.574	6.6414e-11	1.1013e-07
ENSMUSG00000054555	Adam12	2.84472	5.76471	158.756	8.9223e-11	1.25715e-07
ENSMUSG00000025375	Aatk	-1.85056	5.63905	148.189	1.43795e-10	1.73664e-07
ENSMUSG00000028976	Slc2a5	-5.99152	0.982747	148.262	1.33565e-10	1.73664e-07
ENSMUSG00000001750	Tcirg1	2.04216	7.64586	141.227	2.03829e-10	2.15844e-07
ENSMUSG00000031266	Gla	1.90383	5.03468	141.193	2.04253e-10	2.15844e-07
ENSMUSG00000018008	Cyth4	2.30496	7.63311	134.099	3.49069e-10	2.46565e-07
ENSMUSG00000025582	Nptx1	4.54268	1.89363	133.031	3.41706e-10	2.46565e-07
ENSMUSG00000026437	Cdk18	2.6032	5.84094	135.419	3.49986e-10	2.46565e-07
ENSMUSG00000030329	Pianp	3.3753	5.31155	135.793	3.46512e-10	2.46565e-07
ENSMUSG00000049643	2310022A10Rik	1.52694	5.19669	134.382	3.13205e-10	2.46565e-07
ENSMUSG00000050721	Plekho2	1.79144	7.35908	132.765	3.47646e-10	2.46565e-07
ENSMUSG00000050737	Ptges	-1.79313	6.43935	135.487	3.11552e-10	2.46565e-07
ENSMUSG00000053063	Clec12a	3.30408	6.63804	138.09	3.00356e-10	2.46565e-07
ENSMUSG00000005054	Cstb	1.65801	7.29606	131.109	3.87271e-10	2.57837e-07
ENSMUSG00000024696	Lpxn	2.50716	5.05846	132.858	4.11733e-10	2.57837e-07
ENSMUSG00000038650	Rnh1	0.948423	7.26594	130.666	3.98713e-10	2.57837e-07
ENSMUSG00000052688	5430435G22Rik	2.21864	6.76007	131.233	4.3232e-10	2.6106e-07
ENSMUSG00000004814	Ccl24	-1.37972	3.01779	128.749	4.5265e-10	2.63911e-07
ENSMUSG00000001420	Tmem79	-2.49389	2.71404	121.974	7.18462e-10	2.94413e-07
ENSMUSG00000003363	Pld3	1.96923	8.18332	124.185	6.16417e-10	2.94413e-07
ENSMUSG00000003812	Dnase2a	1.75287	6.07987	121.583	7.55107e-10	2.94413e-07
ENSMUSG00000006585	Cdt1	2.04085	3.67629	123.603	6.41618e-10	2.94413e-07
ENSMUSG00000021306	Gpr137b	1.4934	5.88841	121.975	7.18395e-10	2.94413e-07
ENSMUSG00000022449	Adamts20	-5.12029	-0.651629	125.009	5.82544e-10	2.94413e-07
ENSMUSG00000022831	Hcls1	1.69348	6.52444	122.68	6.83952e-10	2.94413e-07
ENSMUSG00000024781	Lipa	2.2931	8.81598	126.149	5.39076e-10	2.94413e-07
ENSMUSG00000027408	Cpxm1	2.66313	6.76993	126.636	6.20597e-10	2.94413e-07
ENSMUSG00000032870	Smap2	1.14232	6.19853	125.981	5.45224e-10	2.94413e-07
ENSMUSG00000033467	Crlf2	0.938605	5.31758	121.442	7.45705e-10	2.94413e-07
ENSMUSG00000040345	Arhgap9	2.13287	5.53511	125.329	6.45929e-10	2.94413e-07
ENSMUSG00000040613	Apobec1	2.57205	7.17045	124.292	7.23827e-10	2.94413e-07
ENSMUSG00000043091	Tuba1c	1.85037	5.72893	121.973	7.66155e-10	2.94413e-07
ENSMUSG00000074361	C5ar2	2.66504	3.08117	121.152	7.61036e-10	2.94413e-07
ENSMUSG00000045903	Npas4	3.51496	3.27029	122.256	7.96744e-10	2.99363e-07
ENSMUSG00000026627	Tmem206	1.72124	4.29444	120.152	8.16589e-10	3.0015e-07
ENSMUSG00000026796	Fam129b	1.55734	8.14856	118.793	8.99387e-10	3.2355e-07
ENSMUSG00000061288	Taok3	1.39946	5.88226	118.117	9.43998e-10	3.32523e-07
ENSMUSG00000032076	Cadm1	2.95047	5.56043	116.734	1.24089e-09	4.19621e-07
ENSMUSG00000022788	Fgd4	1.90655	4.56593	113.4	1.35884e-09	4.31078e-07
ENSMUSG00000028581	Laptm5	2.18239	8.66813	113.305	1.3577e-09	4.31078e-07
ENSMUSG00000029254	Stap1	3.35867	4.32799	115.745	1.33222e-09	4.31078e-07
ENSMUSG00000034993	Vat1	1.18801	8.57622	112.961	1.37676e-09	4.31078e-07
ENSMUSG00000030579	Tyrobp	2.82454	7.57749	114.868	1.4194e-09	4.36349e-07
ENSMUSG00000026956	Uap1l1	1.54843	5.96902	111.365	1.55201e-09	4.68596e-07
ENSMUSG00000025888	Casp1	1.61379	5.19643	110.525	1.65403e-09	4.74007e-07
ENSMUSG00000033685	Ucp2	2.47157	9.77746	110.943	1.60405e-09	4.74007e-07
ENSMUSG00000048779	P2ry6	2.34842	5.69818	112.812	1.63006e-09	4.74007e-07
ENSMUSG00000003348	Mob3a	0.831286	5.79235	109.677	1.76451e-09	4.89087e-07
ENSMUSG00000026360	Rgs2	2.54176	5.59602	112.038	1.7469e-09	4.89087e-07
ENSMUSG00000000278	Scpep1	1.18277	7.10307	108.335	1.95634e-09	4.96486e-07
ENSMUSG00000002111	Spi1	2.4522	6.30089	109.854	2.05667e-09	4.96486e-07
ENSMUSG00000006519	Cyba	2.09963	7.21364	110.291	1.86387e-09	4.96486e-07
ENSMUSG00000020458	Rtn4	0.961814	9.11623	108.528	1.92752e-09	4.96486e-07
ENSMUSG00000020661	Dnmt3a	1.42616	6.7666	108.708	1.90082e-09	4.96486e-07
ENSMUSG00000028111	Ctsk	2.55539	7.28532	109.648	2.06447e-09	4.96486e-07
ENSMUSG00000032312	Csk	0.900411	6.85189	107.747	2.04761e-09	4.96486e-07
ENSMUSG00000035686	Thrsp	-3.33333	9.00708	109.871	2.05399e-09	4.96486e-07
ENSMUSG00000036046	5031439G07Rik	1.43535	7.34051	107.382	2.10671e-09	4.96486e-07
ENSMUSG00000041362	4930506M07Rik	1.63007	5.64594	107.936	2.05599e-09	4.96486e-07
ENSMUSG00000062585	Cnr2	2.035	3.18172	107.336	2.11421e-09	4.96486e-07
ENSMUSG00000031827	Cotl1	2.22651	7.98552	108.368	2.14969e-09	4.97903e-07
ENSMUSG00000002603	Tgfb1	1.08232	6.52775	106.757	2.21212e-09	5.05439e-07
ENSMUSG00000025743	Sdc3	1.45807	8.3364	106.353	2.2833e-09	5.13406e-07
ENSMUSG00000034947	Tmem106a	1.30622	7.40382	106.217	2.30771e-09	5.13406e-07
ENSMUSG00000001525	Tubb5	1.15255	8.57747	105.773	2.38986e-09	5.18048e-07
ENSMUSG00000037902	Sirpa	2.23684	8.67988	106.6	2.36035e-09	5.18048e-07
ENSMUSG00000054520	Sh3bp2	2.24563	5.77612	107.043	2.51899e-09	5.39128e-07
ENSMUSG00000021998	Lcp1	2.92665	9.01123	106.771	2.57231e-09	5.43659e-07
ENSMUSG00000043895	S1pr2	1.65659	5.3217	104.915	2.61269e-09	5.45374e-07
ENSMUSG00000021262	Evl	2.37757	6.73474	104.709	3.03116e-09	6.0295e-07
ENSMUSG00000029093	Sorcs2	-2.67471	2.02036	103.048	2.97066e-09	6.0295e-07
ENSMUSG00000031506	Ptpn7	2.2752	4.75333	104.9	2.97605e-09	6.0295e-07
ENSMUSG00000036086	Zranb3	3.95211	6.09908	106.366	3.00239e-09	6.0295e-07
ENSMUSG00000029470	P2rx4	1.28561	7.05347	102.35	3.14318e-09	6.17964e-07
ENSMUSG00000034641	Cd300ld	2.58326	6.1771	103.796	3.284e-09	6.38229e-07
ENSMUSG00000015396	Cd83	1.97337	5.50015	101.698	3.77529e-09	6.61658e-07
ENSMUSG00000018774	Cd68	3.4046	8.79619	102.367	3.67961e-09	6.61658e-07
ENSMUSG00000019817	Plagl1	-2.21111	5.75386	101.994	3.79147e-09	6.61658e-07
ENSMUSG00000022408	Fam83f	2.22212	3.30501	100.35	3.70218e-09	6.61658e-07
ENSMUSG00000026357	Rgs18	2.10514	3.63504	100.048	3.79589e-09	6.61658e-07
ENSMUSG00000054342	Kcnn4	2.72258	5.21339	101.986	3.7938e-09	6.61658e-07
ENSMUSG00000059089	Fcgr4	3.93804	3.81588	102.928	3.51823e-09	6.61658e-07
ENSMUSG00000071714	Csf2rb2	1.45117	6.29237	100.76	3.57926e-09	6.61658e-07
ENSMUSG00000074577	Fam65c	1.88706	3.13988	101.029	3.50109e-09	6.61658e-07
ENSMUSG00000078945	Naip2	1.9623	4.21514	100.657	3.73362e-09	6.61658e-07
ENSMUSG00000037225	Fgf2	-1.38229	4.75843	99.8529	3.8576e-09	6.65553e-07
ENSMUSG00000079654	Prrt4	-3.02829	2.58038	99.7265	4.20966e-09	7.18959e-07
ENSMUSG00000031165	Was	1.82033	4.69747	99.0257	4.36571e-09	7.23813e-07
ENSMUSG00000039474	Wfs1	1.47339	6.90447	98.1737	4.43805e-09	7.23813e-07
ENSMUSG00000043157	Arl11	2.50063	4.21628	99.9499	4.42511e-09	7.23813e-07
ENSMUSG00000079017	Ifi27l2a	3.07929	8.79315	100.051	4.42509e-09	7.23813e-07
ENSMUSG00000079049	Serpinb1c	7.83587	0.988988	122.122	4.45213e-09	7.23813e-07
ENSMUSG00000030785	Cox6a2	4.4317	0.776525	97.8879	4.54615e-09	7.32059e-07
ENSMUSG00000024816	Frmd8	0.901953	5.71348	97.4215	4.72876e-09	7.54281e-07
ENSMUSG00000015312	Gadd45b	1.34454	4.42282	97.273	4.78861e-09	7.56689e-07
ENSMUSG00000022372	Sla	1.76131	4.53888	97.1902	4.91624e-09	7.69664e-07
ENSMUSG00000025017	Pik3ap1	3.31012	5.64295	98.7667	5.0647e-09	7.78491e-07
ENSMUSG00000069520	Tmem19	0.605557	5.64987	96.6276	5.05854e-09	7.78491e-07
ENSMUSG00000055541	Lair1	2.6245	5.16148	98.3054	5.12282e-09	7.80329e-07
ENSMUSG00000022365	Derl1	-0.68839	7.57593	96.265	5.2175e-09	7.87656e-07
ENSMUSG00000021957	Tkt	-1.73677	9.59369	96.0527	5.31315e-09	7.94997e-07
ENSMUSG00000048897	Zfp710	1.26837	5.70421	95.5452	5.54966e-09	8.17991e-07
ENSMUSG00000063193	Cd300lb	2.97066	6.3928	97.3138	5.56358e-09	8.17991e-07
ENSMUSG00000004207	Psap	1.2702	12.3808	95.0121	5.81069e-09	8.40747e-07
ENSMUSG00000037894	H2afz	0.83113	6.0789	94.8995	5.86753e-09	8.40747e-07
ENSMUSG00000050708	Ftl1	1.31539	11.0423	94.9759	5.82892e-09	8.40747e-07
ENSMUSG00000032046	Abhd12	1.08132	7.96809	94.6151	6.01389e-09	8.54478e-07
ENSMUSG00000034810	Scn7a	-1.11436	6.58801	93.8881	6.40653e-09	8.96292e-07
ENSMUSG00000039873	Neurl2	1.82651	3.62392	93.8744	6.4142e-09	8.96292e-07
ENSMUSG00000041827	Oasl1	2.37837	3.18052	93.5158	6.65009e-09	9.21637e-07
ENSMUSG00000015745	Plekho1	1.72769	6.44817	93.9438	6.95927e-09	9.41338e-07
ENSMUSG00000026317	Cln8	1.33159	6.01425	93.0445	6.89802e-09	9.41338e-07
ENSMUSG00000026355	Mcm6	1.33729	5.31315	93.0278	6.90813e-09	9.41338e-07
ENSMUSG00000078771	Evi2a	2.2671	5.3693	94.5315	7.04046e-09	9.44763e-07
ENSMUSG00000027223	Mapk8ip1	-1.57861	4.2672	92.639	7.17822e-09	9.55664e-07
ENSMUSG00000028843	Sh3bgrl3	1.73088	7.87654	92.1795	7.49404e-09	9.67079e-07
ENSMUSG00000040552	C3ar1	3.29184	7.54264	93.9077	7.42802e-09	9.67079e-07
ENSMUSG00000049988	Lrrc25	2.68267	4.95495	93.9534	7.3988e-09	9.67079e-07
ENSMUSG00000052776	Oas1a	1.96873	3.63868	91.9459	7.60133e-09	9.67079e-07
ENSMUSG00000079685	Ulbp1	1.68916	3.53369	91.9373	7.60714e-09	9.67079e-07
ENSMUSG00000092009	Myh15	7.07676	3.67507	94.3699	7.54603e-09	9.67079e-07
ENSMUSG00000027698	Nceh1	2.86313	6.41851	93.5272	7.6759e-09	9.68539e-07
ENSMUSG00000024617	Camk2a	2.17876	2.87189	91.7151	7.75894e-09	9.71764e-07
ENSMUSG00000028063	Lmna	1.05872	8.09636	91.4104	7.97254e-09	9.84085e-07
ENSMUSG00000032220	Myo1e	2.56579	6.99902	93.0876	7.97372e-09	9.84085e-07
ENSMUSG00000061132	Blnk	2.69051	5.9427	92.9202	8.09047e-09	9.91259e-07
ENSMUSG00000019558	Slc6a8	1.25517	6.41799	91.0358	8.24413e-09	1.00282e-06
ENSMUSG00000047180	Neurl3	1.50642	5.46211	90.9216	8.48821e-09	1.02513e-06
ENSMUSG00000030223	Ptpro	1.82348	4.89961	91.0904	8.93812e-09	1.06903e-06
ENSMUSG00000031838	Ifi30	2.17135	7.11665	91.5598	9.01816e-09	1.06903e-06
ENSMUSG00000036622	Atp13a2	1.23277	7.13344	89.8911	9.13906e-09	1.06903e-06
ENSMUSG00000056888	Glipr1	3.60615	4.86071	91.9044	9.15265e-09	1.06903e-06
ENSMUSG00000071708	Sms	1.14141	3.91795	89.8563	9.16785e-09	1.06903e-06
ENSMUSG00000025402	Nab2	1.06218	5.33014	89.3848	9.56864e-09	1.09315e-06
ENSMUSG00000026387	Sctr	-2.3566	2.62083	89.487	9.48016e-09	1.09315e-06
ENSMUSG00000029622	Arpc1b	1.13494	8.67773	89.4462	9.51533e-09	1.09315e-06
ENSMUSG00000021624	Cd180	3.23357	5.79661	90.909	1.00375e-08	1.13902e-06
ENSMUSG00000024672	Ms4a7	3.5061	5.83461	91.1191	1.04727e-08	1.18048e-06
ENSMUSG00000031875	Cmtm3	1.27952	6.68429	88.2548	1.06098e-08	1.18526e-06
ENSMUSG00000039976	Tbc1d16	-1.25448	5.09261	88.2083	1.06553e-08	1.18526e-06
ENSMUSG00000041220	Elovl6	-2.14611	5.8999	89.3735	1.10667e-08	1.22298e-06
ENSMUSG00000040751	Lat2	2.90355	6.16542	89.1743	1.12665e-08	1.23698e-06
ENSMUSG00000005410	Mcm5	1.62347	4.63029	87.2866	1.18108e-08	1.28837e-06
ENSMUSG00000074570	Cass4	1.67872	3.05889	86.984	1.19325e-08	1.2933e-06
ENSMUSG00000024965	Fermt3	2.25051	6.34649	88.2706	1.22247e-08	1.3082e-06
ENSMUSG00000030148	Clec4a2	2.44938	5.18845	88.2913	1.22018e-08	1.3082e-06
ENSMUSG00000027423	Snx5	1.45999	7.84466	86.3474	1.26626e-08	1.34654e-06
ENSMUSG00000029925	Tbxas1	2.09807	5.90075	87.4444	1.31218e-08	1.37803e-06
ENSMUSG00000030096	Slc6a6	1.85341	8.63211	86.1183	1.30419e-08	1.37803e-06
ENSMUSG00000078485	Plekhn1	0.859435	5.75657	85.8402	1.32796e-08	1.386e-06
ENSMUSG00000032834	Pwp2	0.829345	4.4879	85.7064	1.34479e-08	1.38707e-06
ENSMUSG00000034006	Pqlc1	0.944897	5.11487	85.7015	1.3454e-08	1.38707e-06
ENSMUSG00000005470	Asf1b	2.16536	2.88584	85.5575	1.36378e-08	1.39751e-06
ENSMUSG00000049086	Bmyc	-1.56139	4.26244	85.5473	1.38932e-08	1.4151e-06
ENSMUSG00000004933	Matk	2.5194	4.78414	86.7073	1.41019e-08	1.41716e-06
ENSMUSG00000004952	Rasa4	1.31322	6.18826	85.0258	1.43408e-08	1.41716e-06
ENSMUSG00000034652	Cd300a	2.66629	6.21009	86.655	1.41699e-08	1.41716e-06
ENSMUSG00000035713	Usp35	-1.09386	4.84047	84.9703	1.44164e-08	1.41716e-06
ENSMUSG00000036908	Unc93b1	1.47026	7.9681	84.9748	1.44102e-08	1.41716e-06
ENSMUSG00000049288	Lix1l	-0.581359	6.30708	85.067	1.42848e-08	1.41716e-06
ENSMUSG00000079293	Clec7a	2.54211	6.12712	85.8996	1.51947e-08	1.48504e-06
ENSMUSG00000059173	Pde1a	-1.53892	4.60466	84.8209	1.53337e-08	1.49001e-06
ENSMUSG00000028917	Plekhm2	1.00323	6.52546	84.0976	1.56655e-08	1.51081e-06
ENSMUSG00000030263	Lrmp	1.71096	5.14507	84.9119	1.57264e-08	1.51081e-06
ENSMUSG00000031387	Renbp	1.72443	5.32768	84.6992	1.62753e-08	1.55471e-06
ENSMUSG00000030774	Pak1	2.19052	4.34686	84.7978	1.66743e-08	1.58387e-06
ENSMUSG00000020778	Ten1	1.39913	3.30827	83.0938	1.7252e-08	1.62959e-06
ENSMUSG00000046722	Cdc42se1	0.77749	6.64648	82.97	1.74596e-08	1.64004e-06
ENSMUSG00000026628	Atf3	3.59522	6.62154	85.2475	1.77644e-08	1.64992e-06
ENSMUSG00000040479	Dgkz	0.936175	7.14099	82.7372	1.78576e-08	1.64992e-06
ENSMUSG00000061313	Ddhd2	-0.642333	5.99622	82.7648	1.78098e-08	1.64992e-06
ENSMUSG00000006784	Ttc25	-2.29032	0.981915	82.2787	1.86708e-08	1.71568e-06
ENSMUSG00000022488	Nckap1l	2.71128	7.65047	83.6207	1.88161e-08	1.71969e-06
ENSMUSG00000021451	Sema4d	2.77369	5.03453	83.2362	1.95163e-08	1.77261e-06
ENSMUSG00000023990	Tfeb	0.94837	4.91627	81.6481	1.98568e-08	1.77261e-06
ENSMUSG00000029416	Slc15a4	0.870855	4.74396	81.616	1.99193e-08	1.77261e-06
ENSMUSG00000030147	Clec4b1	2.0666	3.6834	82.2727	1.968e-08	1.77261e-06
ENSMUSG00000038543	BC028528	1.10193	3.90985	81.6885	1.97784e-08	1.77261e-06
ENSMUSG00000021384	Susd3	1.51355	3.24687	81.1202	2.09135e-08	1.85134e-06
ENSMUSG00000015112	Slc25a13	2.69876	3.62262	82.2859	2.1169e-08	1.86419e-06
ENSMUSG00000039208	Metrnl	1.7558	6.20934	81.8344	2.19608e-08	1.9239e-06
ENSMUSG00000062510	Nsl1	1.484	1.97573	80.5433	2.21399e-08	1.9296e-06
ENSMUSG00000026669	Mcm10	1.59332	2.3559	80.4537	2.23375e-08	1.93018e-06
ENSMUSG00000048163	Selplg	1.8431	5.91035	81.7116	2.23749e-08	1.93018e-06
ENSMUSG00000006731	B4galnt1	2.1674	5.2631	81.6929	2.2631e-08	1.93759e-06
ENSMUSG00000059326	Csf2ra	1.76383	7.15133	81.1542	2.26901e-08	1.93759e-06
ENSMUSG00000022884	Eif4a2	-0.791758	8.3189	80.1401	2.30439e-08	1.93844e-06
ENSMUSG00000023992	Trem2	4.36966	7.62384	82.4857	2.3017e-08	1.93844e-06
ENSMUSG00000028873	Cdca8	1.89489	3.31505	80.168	2.29802e-08	1.93844e-06
ENSMUSG00000013707	Tnfaip8l2	2.16217	4.78253	81.0927	2.37603e-08	1.95275e-06
ENSMUSG00000030720	Cln3	1.20638	5.07215	79.9368	2.35153e-08	1.95275e-06
ENSMUSG00000048865	Arhgap30	1.99108	6.35734	81.2073	2.34967e-08	1.95275e-06
ENSMUSG00000070738	Dgkd	-0.632305	7.36533	79.8197	2.37915e-08	1.95275e-06
ENSMUSG00000079547	H2-DMb1	2.06163	6.26988	81.2604	2.35995e-08	1.95275e-06
ENSMUSG00000030844	Rgs10	1.76071	5.32646	80.9214	2.40341e-08	1.96314e-06
ENSMUSG00000020400	Tnip1	0.92767	6.04292	79.3651	2.48982e-08	1.98575e-06
ENSMUSG00000026458	Ppfia4	1.63344	3.57289	79.4193	2.47635e-08	1.98575e-06
ENSMUSG00000033590	Myo5c	-3.46724	0.233035	79.3712	2.48832e-08	1.98575e-06
ENSMUSG00000035105	Egln3	-1.66697	2.14188	79.4896	2.45896e-08	1.98575e-06
ENSMUSG00000098055	Gm26947	3.20833	1.77368	79.4129	2.47793e-08	1.98575e-06
ENSMUSG00000060586	H2-Eb1	1.23653	9.21902	79.0527	2.56917e-08	2.03885e-06
ENSMUSG00000091055	Siglec15	4.88695	0.482362	79.0089	2.58052e-08	2.03885e-06
ENSMUSG00000017417	Plxdc1	2.27829	4.47724	80.0146	2.64048e-08	2.05739e-06
ENSMUSG00000036905	C1qb	2.25955	9.15209	79.6392	2.61795e-08	2.05739e-06
ENSMUSG00000045763	Basp1	2.25296	5.41949	80.1338	2.63443e-08	2.05739e-06
ENSMUSG00000026806	Ddx31	1.14357	3.14229	78.6927	2.66409e-08	2.06626e-06
ENSMUSG00000031740	Mmp2	1.66505	7.45669	78.8034	2.79359e-08	2.15681e-06
ENSMUSG00000037820	Tgm2	0.894785	9.08342	77.9962	2.85887e-08	2.18723e-06
ENSMUSG00000074622	Mafb	2.36612	7.27436	79.3359	2.85012e-08	2.18723e-06
ENSMUSG00000041319	Thoc6	0.790708	4.08084	77.8865	2.89096e-08	2.20181e-06
ENSMUSG00000033059	Pygb	-1.5755	8.18605	77.9731	2.91489e-08	2.21009e-06
ENSMUSG00000001228	Uhrf1	1.84042	3.96427	78.1606	2.93998e-08	2.21916e-06
ENSMUSG00000025555	Farp1	-1.04199	5.04793	77.3239	3.06187e-08	2.28062e-06
ENSMUSG00000034708	Grn	1.19826	9.77075	77.3309	3.0597e-08	2.28062e-06
ENSMUSG00000062082	Cd200r4	3.00704	2.75828	77.9644	3.0437e-08	2.28062e-06
ENSMUSG00000035004	Igsf6	2.536	5.45406	78.4983	3.0977e-08	2.29719e-06
ENSMUSG00000024610	Cd74	1.28078	10.4283	76.8536	3.21332e-08	2.35198e-06
ENSMUSG00000034902	Pip5k1c	0.841955	7.08369	76.8827	3.20372e-08	2.35198e-06
ENSMUSG00000091345	Col6a5	2.41308	7.64993	78.2171	3.18606e-08	2.35198e-06
ENSMUSG00000027843	Ptpn22	1.98346	3.70377	77.2512	3.23615e-08	2.35848e-06
ENSMUSG00000004266	Ptpn6	2.13202	5.88841	77.904	3.28776e-08	2.38581e-06
ENSMUSG00000041859	Mcm3	1.20746	4.84102	76.589	3.30215e-08	2.38601e-06
ENSMUSG00000039981	Zc3h12d	2.04178	3.22774	76.4078	3.36454e-08	2.42075e-06
ENSMUSG00000026480	Ncf2	2.05939	6.09219	77.5409	3.41021e-08	2.4329e-06
ENSMUSG00000049130	C5ar1	2.82966	6.5291	77.7723	3.40015e-08	2.4329e-06
ENSMUSG00000097715	Gpr137b-ps	1.62639	5.22587	76.8483	3.48784e-08	2.47783e-06
ENSMUSG00000040212	Emp3	1.41888	6.67548	75.7746	3.65507e-08	2.58577e-06
ENSMUSG00000028927	Padi2	1.96107	3.25632	75.4755	3.70676e-08	2.61141e-06
ENSMUSG00000025574	Tk1	2.74891	3.98963	76.39	3.83275e-08	2.61351e-06
ENSMUSG00000029420	Rimbp2	-3.81201	0.0555567	75.2159	3.80876e-08	2.61351e-06
ENSMUSG00000029560	Snx8	1.41509	6.03071	75.5707	3.8334e-08	2.61351e-06
ENSMUSG00000033777	Tlr13	3.76406	5.68555	77.4351	3.76741e-08	2.61351e-06
ENSMUSG00000035891	Cerk	1.56011	6.61896	75.8934	3.82441e-08	2.61351e-06
ENSMUSG00000040528	Milr1	2.46387	3.4522	76.2923	3.72723e-08	2.61351e-06
ENSMUSG00000041515	Irf8	1.89732	6.09422	76.3238	3.82383e-08	2.61351e-06
ENSMUSG00000042759	Apobr	1.40827	5.73175	75.6737	3.79265e-08	2.61351e-06
ENSMUSG00000029175	Slc35f6	1.05915	5.90954	75.0998	3.85536e-08	2.61793e-06
ENSMUSG00000024660	Incenp	1.6163	4.80054	75.6687	3.89846e-08	2.63661e-06
ENSMUSG00000058715	Fcer1g	2.24602	6.99352	76.1518	3.92726e-08	2.6455e-06
ENSMUSG00000004730	Emr1	2.99114	7.98699	75.9473	4.01043e-08	2.68043e-06
ENSMUSG00000026177	Slc11a1	1.97917	6.64408	75.7929	4.05837e-08	2.68043e-06
ENSMUSG00000033697	Arhgap39	1.2093	4.99957	74.6483	4.0427e-08	2.68043e-06
ENSMUSG00000063428	Ddo	-1.48422	3.26622	74.7127	4.01538e-08	2.68043e-06
ENSMUSG00000079426	Arpc4	0.577712	6.69293	74.5193	4.09807e-08	2.69612e-06
ENSMUSG00000064109	Hcst	1.90129	1.75544	74.3796	4.15893e-08	2.72555e-06
ENSMUSG00000024742	Fen1	1.43714	3.9795	74.3056	4.19161e-08	2.73636e-06
ENSMUSG00000037946	Fgd3	2.22778	4.50086	75.2085	4.3105e-08	2.80315e-06
ENSMUSG00000003283	Hck	3.03306	4.64303	75.1179	4.36829e-08	2.81905e-06
ENSMUSG00000036894	Rap2b	1.25384	5.6948	73.9346	4.35964e-08	2.81905e-06
ENSMUSG00000071379	Hpcal1	1.06451	6.0064	73.7589	4.44181e-08	2.8556e-06
ENSMUSG00000005268	Prlr	-1.74955	3.13708	73.6074	4.51401e-08	2.89102e-06
ENSMUSG00000039774	Galnt12	2.37651	3.15877	74.027	4.56037e-08	2.89875e-06
ENSMUSG00000046230	Vps13a	-0.817177	4.68554	73.5465	4.54341e-08	2.89875e-06
ENSMUSG00000031980	Agt	-3.00543	6.90133	75.4391	4.61057e-08	2.91968e-06
ENSMUSG00000019088	Dnase1l1	1.17604	5.90657	73.3541	4.63766e-08	2.92588e-06
ENSMUSG00000036594	H2-Aa	1.24379	9.70648	73.1517	4.73917e-08	2.97881e-06
ENSMUSG00000021375	Kif13a	-0.748811	5.70133	73.0193	4.80687e-08	3.01017e-06
ENSMUSG00000021458	2010111I01Rik	1.16585	5.77505	72.9342	4.85094e-08	3.02656e-06
ENSMUSG00000024737	Slc15a3	3.44499	6.22499	74.8412	4.90227e-08	3.0333e-06
ENSMUSG00000032826	Ank2	-0.967726	4.70461	72.8373	4.90167e-08	3.0333e-06
ENSMUSG00000059956	Serpinb12	5.64171	-0.260017	72.811	4.91557e-08	3.0333e-06
ENSMUSG00000040659	Efhd2	1.79458	7.38845	73.6792	4.93922e-08	3.0352e-06
ENSMUSG00000072812	Ahnak2	1.53802	6.1568	73.4179	4.95456e-08	3.0352e-06
ENSMUSG00000001473	Tubb6	1.19199	6.40696	72.6689	4.99127e-08	3.04666e-06
ENSMUSG00000089809	A930011G23Rik	2.20555	3.86167	73.5318	5.0497e-08	3.07124e-06
ENSMUSG00000003546	Klc4	0.73334	5.10806	72.4304	5.12123e-08	3.08148e-06
ENSMUSG00000019876	Pkib	3.04687	3.20933	73.5161	5.11813e-08	3.08148e-06
ENSMUSG00000036526	Card11	3.1693	4.44621	73.7527	5.09703e-08	3.08148e-06
ENSMUSG00000009654	Oit3	3.51672	1.07074	72.3738	5.15261e-08	3.08937e-06
ENSMUSG00000029771	Irf5	1.96599	6.1271	73.4928	5.17617e-08	3.09253e-06
ENSMUSG00000025764	Phf17	-0.645407	5.92596	72.2884	5.20041e-08	3.09607e-06
ENSMUSG00000017639	Rab11fip4	-1.65498	3.75429	72.4671	5.32052e-08	3.11278e-06
ENSMUSG00000027068	Dhrs9	3.38979	4.53419	73.5724	5.308e-08	3.11278e-06
ENSMUSG00000028459	Cd72	3.91354	5.14691	74.075	5.30625e-08	3.11278e-06
ENSMUSG00000032122	Slc37a2	3.96716	7.15769	74.1063	5.28907e-08	3.11278e-06
ENSMUSG00000096960	A230028O05Rik	3.09771	1.66033	72.1664	5.26945e-08	3.11278e-06
ENSMUSG00000049969	Plekhf2	0.575803	5.1206	71.8652	5.4444e-08	3.17427e-06
ENSMUSG00000053158	Fes	1.17188	6.25569	71.6081	5.59878e-08	3.25307e-06
ENSMUSG00000032802	Srxn1	1.00488	6.14892	71.5076	5.66044e-08	3.27763e-06
ENSMUSG00000050022	Amz1	1.13123	3.6825	71.4209	5.7142e-08	3.29746e-06
ENSMUSG00000021466	Ptch1	-0.836861	5.0783	71.3232	5.77549e-08	3.32149e-06
ENSMUSG00000075254	Heg1	-0.742011	7.75048	71.2391	5.82885e-08	3.34082e-06
ENSMUSG00000029401	Rilpl2	1.01079	4.7635	71.1507	5.88548e-08	3.36188e-06
ENSMUSG00000029438	Bcl7a	-1.08979	3.54069	71.0363	5.95967e-08	3.38141e-06
ENSMUSG00000058486	Wdr91	1.23604	5.74631	71.0376	5.95883e-08	3.38141e-06
ENSMUSG00000020818	Mfsd11	0.999761	5.67422	70.8731	6.06735e-08	3.43099e-06
ENSMUSG00000039062	Anpep	2.41667	7.955	71.9509	6.09757e-08	3.43659e-06
ENSMUSG00000028931	Kcnab2	1.63944	5.12017	71.5778	6.17271e-08	3.46738e-06
ENSMUSG00000018965	Ywhah	0.72909	7.11155	70.5662	6.27565e-08	3.49042e-06
ENSMUSG00000034226	Rhov	4.35731	1.87909	71.1122	6.24641e-08	3.49042e-06
ENSMUSG00000092517	Art2a-ps	5.33363	0.57191	70.5691	6.27366e-08	3.49042e-06
ENSMUSG00000085184	4933439K11Rik	2.78864	0.230866	70.3314	6.4404e-08	3.5703e-06
ENSMUSG00000027239	Mdk	1.63875	2.72529	70.0063	6.67638e-08	3.67701e-06
ENSMUSG00000019132	BC005537	0.953415	8.39293	69.9249	6.7369e-08	3.68699e-06
ENSMUSG00000027379	Bub1	2.49879	2.06637	69.9233	6.73811e-08	3.68699e-06
ENSMUSG00000021965	Ska3	2.26612	1.11982	69.6318	6.96003e-08	3.77346e-06
ENSMUSG00000022102	Dok2	1.58423	5.84247	70.5038	6.9631e-08	3.77346e-06
ENSMUSG00000044350	Lacc1	1.44539	5.54666	70.2464	6.9489e-08	3.77346e-06
ENSMUSG00000085151	1110018N20Rik	-1.51911	2.1533	69.5233	7.04472e-08	3.8055e-06
ENSMUSG00000026979	Psd4	1.67707	4.81845	70.2218	7.08127e-08	3.81306e-06
ENSMUSG00000021775	Nr1d2	-0.668117	6.36363	69.3357	7.19377e-08	3.84912e-06
ENSMUSG00000044042	Fmn1	2.14882	3.79648	70.2408	7.19224e-08	3.84912e-06
ENSMUSG00000027306	Nusap1	1.42907	3.06846	69.2775	7.24076e-08	3.86204e-06
ENSMUSG00000030798	Cd37	1.70955	6.21071	70.2495	7.26764e-08	3.86419e-06
ENSMUSG00000024300	Myo1f	2.92587	7.23907	70.414	7.35084e-08	3.88176e-06
ENSMUSG00000034216	Vps18	0.657698	5.42106	69.0403	7.43561e-08	3.88176e-06
ENSMUSG00000037907	Ankrd13b	0.977886	4.06173	69.103	7.38353e-08	3.88176e-06
ENSMUSG00000041654	Slc39a11	0.929515	5.16751	69.0369	7.43843e-08	3.88176e-06
ENSMUSG00000057672	Pkn1	0.663429	7.49688	69.0943	7.39075e-08	3.88176e-06
ENSMUSG00000074802	Gas2l3	2.79079	3.91818	70.1344	7.42268e-08	3.88176e-06
ENSMUSG00000036931	Nfkbid	2.31074	2.93102	69.1189	7.49496e-08	3.88726e-06
ENSMUSG00000056758	Hmga2	5.00222	2.21199	69.9816	7.48397e-08	3.88726e-06
ENSMUSG00000007041	Clic1	1.39127	7.2561	68.7859	7.73975e-08	4.00195e-06
ENSMUSG00000038459	Abhd17c	0.915058	4.85195	68.5451	7.86129e-08	4.0524e-06
ENSMUSG00000022945	Chaf1b	1.54812	2.39356	68.4624	7.93502e-08	4.0766e-06
ENSMUSG00000024621	Csf1r	1.53953	8.65877	68.4385	7.95646e-08	4.0766e-06
ENSMUSG00000031609	Sap30	1.55193	2.62627	68.3902	7.99999e-08	4.08652e-06
ENSMUSG00000032344	Mb21d1	1.5121	2.26072	68.3519	8.03462e-08	4.09185e-06
ENSMUSG00000060131	Atp8b4	2.6725	4.24051	69.3848	8.05962e-08	4.09226e-06
ENSMUSG00000025877	Hk3	2.91471	6.10981	69.9418	8.1192e-08	4.11016e-06
ENSMUSG00000004270	Lpcat3	0.621044	6.80685	68.1074	8.26011e-08	4.16901e-06
ENSMUSG00000047123	Ticam1	0.861809	4.47914	68.049	8.31495e-08	4.1842e-06
ENSMUSG00000029468	P2rx7	1.47623	5.41751	68.2752	8.68218e-08	4.30494e-06
ENSMUSG00000049719	Prss46	4.77653	0.820577	67.6761	8.67489e-08	4.30494e-06
ENSMUSG00000068335	Dok1	0.915525	4.88596	67.687	8.6641e-08	4.30494e-06
ENSMUSG00000073982	Rhog	1.18101	6.50622	67.7226	8.62908e-08	4.30494e-06
ENSMUSG00000074505	Fat3	4.3247	2.90282	68.7396	8.65646e-08	4.30494e-06
ENSMUSG00000021549	Rasa1	1.24264	6.49689	67.5837	8.76674e-08	4.33415e-06
ENSMUSG00000048216	Gpr85	2.94863	1.32116	67.451	8.90048e-08	4.37469e-06
ENSMUSG00000005442	Cic	0.799406	7.45044	67.3854	8.96737e-08	4.38552e-06
ENSMUSG00000073421	H2-Ab1	1.16222	9.12152	67.3786	8.97439e-08	4.38552e-06
ENSMUSG00000057342	Sphk2	0.862412	5.59717	67.3168	9.03797e-08	4.40386e-06
ENSMUSG00000026737	Pip4k2a	1.19982	6.01096	67.2343	9.12379e-08	4.4329e-06
ENSMUSG00000017929	B4galt5	1.65842	5.94484	67.9549	9.37084e-08	4.51291e-06
ENSMUSG00000024644	Cndp2	1.18036	7.79917	66.9682	9.4064e-08	4.51291e-06
ENSMUSG00000028599	Tnfrsf1b	1.56724	6.80179	67.6561	9.42192e-08	4.51291e-06
ENSMUSG00000030707	Coro1a	1.54024	6.73305	67.6771	9.33717e-08	4.51291e-06
ENSMUSG00000034786	Gpsm3	1.41084	4.3473	66.9795	9.39427e-08	4.51291e-06
ENSMUSG00000031604	Sc4mol	0.808	5.21429	66.7435	9.65258e-08	4.61034e-06
ENSMUSG00000021190	Lgmn	2.20695	8.90813	67.6373	9.71149e-08	4.6254e-06
ENSMUSG00000056708	Ier5	1.17034	5.10912	66.6034	9.80978e-08	4.64838e-06
ENSMUSG00000025648	Pfkfb4	1.60216	5.64333	67.5099	9.85202e-08	4.65301e-06
ENSMUSG00000027514	Zbp1	1.62456	3.39717	66.5344	9.88819e-08	4.65709e-06
ENSMUSG00000030047	Arhgap25	2.80454	6.52413	67.8712	9.92287e-08	4.66044e-06
ENSMUSG00000054200	Ffar4	-1.74889	4.29674	67.4145	9.95868e-08	4.66044e-06
ENSMUSG00000056054	S100a8	3.05753	3.98394	67.4704	9.97799e-08	4.66044e-06
ENSMUSG00000027513	Pck1	-2.84594	10.2414	67.4382	1.00143e-07	4.6645e-06
ENSMUSG00000054021	Sirt5	-0.828894	3.33681	66.3913	1.0053e-07	4.66966e-06
ENSMUSG00000056394	Lig1	1.40371	4.39333	66.3673	1.00809e-07	4.66979e-06
ENSMUSG00000025192	Entpd7	1.11831	3.62855	66.2505	1.02181e-07	4.72044e-06
ENSMUSG00000056737	Capg	2.42584	7.99657	67.2239	1.02597e-07	4.72672e-06
ENSMUSG00000039206	Daglb	1.4452	6.99141	66.5719	1.03757e-07	4.7672e-06
ENSMUSG00000037295	Ldlrap1	0.650938	6.05441	66.088	1.04124e-07	4.77108e-06
ENSMUSG00000049526	Tmem202	1.28934	2.04838	65.9808	1.05428e-07	4.81778e-06
ENSMUSG00000026065	Slc9a4	2.77495	2.57399	66.1703	1.07601e-07	4.90382e-06
ENSMUSG00000053040	Aph1c	1.62311	4.28689	66.1189	1.0933e-07	4.95591e-06
ENSMUSG00000027342	Pcna	1.02221	6.22877	65.5731	1.10556e-07	4.98849e-06
ENSMUSG00000052160	Pld4	1.18117	6.41495	65.5666	1.10639e-07	4.98849e-06
ENSMUSG00000034738	Nostrin	1.76376	3.0772	65.4958	1.11559e-07	5.01657e-06
ENSMUSG00000033065	Pfkm	-0.822557	4.91907	65.3992	1.12826e-07	5.04671e-06
ENSMUSG00000034595	Ppp1r18	0.668432	6.88402	65.415	1.12617e-07	5.04671e-06
ENSMUSG00000027956	Tmem144	2.17375	2.24175	65.3051	1.14075e-07	5.08654e-06
ENSMUSG00000029910	Mad2l1	1.47971	3.453	65.2422	1.14919e-07	5.08654e-06
ENSMUSG00000032020	Ubash3b	1.90687	4.38983	66.1934	1.14428e-07	5.08654e-06
ENSMUSG00000049313	Sorl1	-1.36021	5.84537	65.8893	1.14715e-07	5.08654e-06
ENSMUSG00000005142	Man2b1	0.929484	8.48083	65.1803	1.15756e-07	5.09628e-06
ENSMUSG00000021069	Pygl	-1.58799	7.92038	65.7084	1.16334e-07	5.09628e-06
ENSMUSG00000030225	Dera	0.824454	4.95643	65.1305	1.16435e-07	5.09628e-06
ENSMUSG00000031700	Gpt2	-1.24297	7.40345	65.115	1.16647e-07	5.09628e-06
ENSMUSG00000032788	Pdxk	1.04539	7.50555	65.1456	1.16229e-07	5.09628e-06
ENSMUSG00000026600	Soat1	2.21016	6.43414	66.0618	1.17114e-07	5.10353e-06
ENSMUSG00000020143	Dock2	2.16959	6.57022	66.0309	1.17531e-07	5.10851e-06
ENSMUSG00000049985	Ankrd55	2.16978	0.402818	64.9901	1.18371e-07	5.13183e-06
ENSMUSG00000019302	Atp6v0a1	1.01288	8.95161	64.9675	1.18686e-07	5.13232e-06
ENSMUSG00000023994	Nfya	0.938995	5.64455	64.8569	1.20241e-07	5.18633e-06
ENSMUSG00000071715	Ncf4	1.78139	4.63575	65.7392	1.20558e-07	5.18675e-06
ENSMUSG00000042613	Pbxip1	-0.966587	6.82303	64.8119	1.2088e-07	5.1874e-06
ENSMUSG00000004530	Coro1c	0.808821	7.77909	64.7216	1.22174e-07	5.22593e-06
ENSMUSG00000072082	Ccnf	1.64903	2.87236	64.7062	1.22396e-07	5.22593e-06
ENSMUSG00000003814	Calr	0.714112	9.44264	64.6598	1.23068e-07	5.24141e-06
ENSMUSG00000014686	Ceacam16	3.41342	1.42413	64.5586	1.24548e-07	5.26464e-06
ENSMUSG00000020808	Fam64a	1.80615	2.53202	64.5978	1.23971e-07	5.26464e-06
ENSMUSG00000043154	Ppp2r3a	-0.794225	4.23864	64.571	1.24365e-07	5.26464e-06
ENSMUSG00000020935	Dcakd	0.861214	5.19936	64.4719	1.25831e-07	5.30563e-06
ENSMUSG00000048424	Ranbp3l	-2.64877	0.888987	64.0647	1.32058e-07	5.55431e-06
ENSMUSG00000037098	Rab11fip3	-0.63219	5.15154	63.9672	1.33597e-07	5.59218e-06
ENSMUSG00000037315	Phf16	-1.19557	3.26888	63.9658	1.3362e-07	5.59218e-06
ENSMUSG00000044827	Tlr1	2.87157	4.59881	64.9945	1.34103e-07	5.59853e-06
ENSMUSG00000020901	Pik3r5	2.28696	5.7938	64.8222	1.35146e-07	5.61438e-06
ENSMUSG00000035186	Ubd	5.23338	7.46323	65.5036	1.35012e-07	5.61438e-06
ENSMUSG00000026548	Slamf9	1.60494	4.64572	64.4245	1.35822e-07	5.62109e-06
ENSMUSG00000056515	Rab31	1.03799	6.58178	63.8193	1.35973e-07	5.62109e-06
ENSMUSG00000028334	Nans	0.683788	5.3446	63.6982	1.37953e-07	5.6674e-06
ENSMUSG00000037731	Themis2	1.35223	5.62948	64.1485	1.38098e-07	5.6674e-06
ENSMUSG00000047881	Rell1	0.871397	5.01462	63.7154	1.37669e-07	5.6674e-06
ENSMUSG00000021886	Gpr65	2.78497	3.63543	64.5437	1.39606e-07	5.67419e-06
ENSMUSG00000025171	Ubtd1	0.828515	5.34235	63.6266	1.39138e-07	5.67419e-06
ENSMUSG00000025534	Gusb	1.21884	8.05721	63.6037	1.39518e-07	5.67419e-06
ENSMUSG00000032661	Oas3	2.63716	1.98056	63.6072	1.3946e-07	5.67419e-06
ENSMUSG00000028337	Coro2a	1.11144	4.577	63.4637	1.41876e-07	5.7526e-06
ENSMUSG00000034116	Vav1	2.3461	5.13725	64.3565	1.42695e-07	5.76601e-06
ENSMUSG00000037110	Ralgapa2	-0.90417	5.9036	63.3844	1.43229e-07	5.76601e-06
ENSMUSG00000057948	Unc13d	1.45748	2.85289	63.3941	1.43064e-07	5.76601e-06
ENSMUSG00000029994	Anxa4	0.76222	6.95983	63.3431	1.43942e-07	5.78093e-06
ENSMUSG00000032827	Ppp1r9a	-0.756116	4.43528	63.3078	1.44552e-07	5.79165e-06
ENSMUSG00000026170	Cyp27a1	-0.840956	6.10859	63.2577	1.45425e-07	5.81286e-06
ENSMUSG00000030872	Gga2	-0.628894	6.35085	63.2274	1.45954e-07	5.82028e-06
ENSMUSG00000033386	Frrs1	1.0996	5.25451	63.1585	1.47167e-07	5.85484e-06
ENSMUSG00000024912	Fosl1	3.40436	1.52965	62.8976	1.51864e-07	6.01338e-06
ENSMUSG00000069607	Cd300lh	3.53141	0.836295	62.9114	1.51613e-07	6.01338e-06
ENSMUSG00000021939	Ctsb	1.20805	12.318	62.7676	1.54266e-07	6.09421e-06
ENSMUSG00000056529	Ptafr	1.52293	6.42681	63.4907	1.54917e-07	6.1057e-06
ENSMUSG00000048899	Rimkla	-2.09782	-0.500008	62.6541	1.56397e-07	6.14968e-06
ENSMUSG00000011148	Adssl1	2.49809	4.9907	63.3893	1.59906e-07	6.25712e-06
ENSMUSG00000025269	Apex2	0.706294	3.63557	62.4537	1.6024e-07	6.25712e-06
ENSMUSG00000033740	St18	5.18948	0.926345	62.4701	1.59922e-07	6.25712e-06
ENSMUSG00000003882	Il7r	3.40964	5.55884	63.9379	1.61789e-07	6.30308e-06
ENSMUSG00000027323	Rad51	2.12717	2.20984	62.279	1.63675e-07	6.36188e-06
ENSMUSG00000038644	Pold1	0.754297	4.2114	62.2351	1.64551e-07	6.38126e-06
ENSMUSG00000032589	Bsn	1.64122	2.02716	62.2072	1.6511e-07	6.38827e-06
ENSMUSG00000020205	Phlda1	1.29112	4.24928	62.1455	1.66355e-07	6.42175e-06
ENSMUSG00000047534	Mis18bp1	1.78725	1.96683	62.0851	1.67582e-07	6.45438e-06
ENSMUSG00000035476	Tab3	-1.15079	4.4626	62.0326	1.68658e-07	6.48108e-06
ENSMUSG00000006715	Gmnn	1.30256	3.14631	61.8831	1.71762e-07	6.55506e-06
ENSMUSG00000035914	Cd276	1.08266	3.53844	61.8654	1.72134e-07	6.55506e-06
ENSMUSG00000037868	Egr2	2.90207	4.84569	63.152	1.71329e-07	6.55506e-06
ENSMUSG00000038508	Gdf15	2.31503	1.95718	61.892	1.71576e-07	6.55506e-06
ENSMUSG00000020184	Mdm2	0.674512	5.95041	61.7972	1.73574e-07	6.58152e-06
ENSMUSG00000021763	BC067074	-1.67454	3.34282	61.9495	1.73608e-07	6.58152e-06
ENSMUSG00000026023	Cdk15	2.97519	1.75194	61.7066	1.75509e-07	6.59447e-06
ENSMUSG00000026827	Gpd2	-1.21489	5.14384	61.9696	1.75393e-07	6.59447e-06
ENSMUSG00000038886	Man2a2	-0.826667	7.77042	61.7272	1.75068e-07	6.59447e-06
ENSMUSG00000044811	AF251705	3.09625	5.2943	63.2817	1.74717e-07	6.59447e-06
ENSMUSG00000027198	Ext2	-0.531817	6.28627	61.6584	1.76548e-07	6.6188e-06
ENSMUSG00000031299	Pdha1	-1.02854	8.16343	61.4532	1.81047e-07	6.77245e-06
ENSMUSG00000048142	Nat8l	-2.64725	6.00129	62.9563	1.81548e-07	6.77619e-06
ENSMUSG00000006219	Fblim1	1.60192	5.94651	62.2323	1.82159e-07	6.78402e-06
ENSMUSG00000040268	Plekha1	0.503234	6.03916	61.3188	1.84062e-07	6.83982e-06
ENSMUSG00000006273	Atp6v1b2	1.07676	8.46407	61.2041	1.86681e-07	6.92192e-06
ENSMUSG00000022763	Aifm3	-2.70093	0.0793591	61.1676	1.8752e-07	6.92269e-06
ENSMUSG00000032584	Mst1r	-1.28808	5.2637	61.6925	1.87307e-07	6.92269e-06
ENSMUSG00000039294	BC017643	0.710115	5.40582	60.8462	1.95113e-07	7.1873e-06
ENSMUSG00000031298	Gpr64	-2.8295	3.92714	61.7419	1.98427e-07	7.27766e-06
ENSMUSG00000037306	Man1c1	1.23612	6.60654	60.8298	1.98157e-07	7.27766e-06
ENSMUSG00000028494	Plin2	1.48799	10.3484	60.6577	1.99724e-07	7.30938e-06
ENSMUSG00000022346	Myc	1.07554	4.02276	60.6292	2.0043e-07	7.31938e-06
ENSMUSG00000030082	Sec61a1	0.470927	7.46171	60.5167	2.03251e-07	7.40638e-06
ENSMUSG00000007594	Hapln4	3.53217	2.09868	61.1451	2.04523e-07	7.43673e-06
ENSMUSG00000060572	Mfap2	1.58013	3.75553	60.5253	2.05151e-07	7.44353e-06
ENSMUSG00000040713	Creg1	1.0105	7.38199	60.3891	2.06502e-07	7.47651e-06
ENSMUSG00000097471	5830432E09Rik	2.06325	1.9369	60.3718	2.06945e-07	7.47656e-06
ENSMUSG00000030313	Dennd5b	-0.752641	3.81125	60.2551	2.09976e-07	7.56987e-06
ENSMUSG00000046410	Kcnk6	1.29929	4.47509	60.1251	2.13411e-07	7.67736e-06
ENSMUSG00000035121	Neil2	-1.17801	2.67802	59.9913	2.1701e-07	7.79023e-06
ENSMUSG00000038147	Cd84	2.97444	6.91204	61.4364	2.1761e-07	7.79523e-06
ENSMUSG00000035158	Mitf	1.29935	4.69281	60.0178	2.1853e-07	7.81164e-06
ENSMUSG00000025647	Shisa5	0.644297	7.86001	59.8447	2.21028e-07	7.88425e-06
ENSMUSG00000032392	Parp16	-1.0682	4.2839	59.8014	2.22231e-07	7.91049e-06
ENSMUSG00000028463	Car9	2.8105	1.32272	59.7218	2.24464e-07	7.97318e-06
ENSMUSG00000000958	Slc7a7	1.4061	4.10237	59.6029	2.27841e-07	8.03712e-06
ENSMUSG00000030806	Stx1b	-1.5188	4.44874	60.1856	2.28641e-07	8.03712e-06
ENSMUSG00000031885	Cbfb	0.834676	5.46373	59.6258	2.27184e-07	8.03712e-06
ENSMUSG00000040964	Arhgef10l	1.17955	4.75808	59.5775	2.28569e-07	8.03712e-06
ENSMUSG00000072620	Slfn2	2.0417	5.44393	60.4285	2.28563e-07	8.03712e-06
ENSMUSG00000059498	Fcgr3	2.02504	7.22166	60.4021	2.29305e-07	8.04376e-06
ENSMUSG00000046031	Fam26f	2.38654	1.85568	59.4436	2.32453e-07	8.1373e-06
ENSMUSG00000058818	Pirb	2.16351	6.98981	60.2544	2.33512e-07	8.14065e-06
ENSMUSG00000070354	Gm21975	2.58337	1.33507	59.2776	2.37371e-07	8.25817e-06
ENSMUSG00000089929	Bcl2a1b	2.88691	1.35805	59.2354	2.3864e-07	8.28525e-06
ENSMUSG00000054702	Ap1s3	2.00948	1.5355	59.1929	2.39924e-07	8.29579e-06
ENSMUSG00000030793	Pycard	1.77438	4.5306	59.9214	2.41496e-07	8.29923e-06
ENSMUSG00000048677	Tpcn2	1.69256	6.3122	59.9633	2.40776e-07	8.29923e-06
ENSMUSG00000095788	Sirpb1a	3.58166	1.33573	59.1427	2.4145e-07	8.29923e-06
ENSMUSG00000029810	Tmem176b	1.23913	7.52847	59.0174	2.45313e-07	8.41329e-06
ENSMUSG00000022769	Sdf2l1	1.28429	4.70258	59.0727	2.46668e-07	8.44264e-06
ENSMUSG00000044252	Osbpl1a	-1.06505	5.40177	58.7361	2.54225e-07	8.68371e-06
ENSMUSG00000063015	Ccni	-0.544986	7.55752	58.647	2.57123e-07	8.76498e-06
ENSMUSG00000021094	Dhrs7	-0.721494	6.22373	58.6214	2.57962e-07	8.76809e-06
ENSMUSG00000023982	Guca1a	1.80268	1.5937	58.5969	2.5877e-07	8.76809e-06
ENSMUSG00000034773	BC030867	2.34347	1.20824	58.6015	2.58618e-07	8.76809e-06
ENSMUSG00000022952	Runx1	1.63508	4.4626	59.129	2.59894e-07	8.78859e-06
ENSMUSG00000027901	Dennd2d	-2.18065	3.53947	59.2629	2.64054e-07	8.91144e-06
ENSMUSG00000021457	Syk	1.76793	7.05117	59.1813	2.64791e-07	8.9185e-06
ENSMUSG00000029552	Tes	0.96784	4.57034	58.3553	2.66869e-07	8.97062e-06
ENSMUSG00000023367	Tmem176a	1.52395	6.69285	58.9291	2.73284e-07	9.16803e-06
ENSMUSG00000024900	Cpt1a	0.893309	7.47873	58.0866	2.76205e-07	9.24769e-06
ENSMUSG00000048612	Myof	1.62942	7.0498	58.7981	2.77815e-07	9.28321e-06
ENSMUSG00000026525	Opn3	-1.8185	4.15512	58.7572	2.79249e-07	9.3127e-06
ENSMUSG00000046323	Dppa3	3.4517	1.04374	57.9788	2.80055e-07	9.3212e-06
ENSMUSG00000021250	Fos	2.41648	5.52743	58.9153	2.80794e-07	9.32742e-06
ENSMUSG00000024030	Abcg1	1.14326	6.79875	57.943	2.81345e-07	9.32742e-06
ENSMUSG00000001768	Rin2	0.656458	6.92662	57.8779	2.83708e-07	9.38733e-06
ENSMUSG00000015340	Cybb	1.97206	7.19771	58.6316	2.85788e-07	9.40096e-06
ENSMUSG00000022841	Ap2m1	0.694816	7.43119	57.8212	2.85784e-07	9.40096e-06
ENSMUSG00000032067	Pts	-0.744388	5.31038	57.8229	2.85722e-07	9.40096e-06
ENSMUSG00000025044	Msr1	2.74901	5.37737	59.1733	2.8688e-07	9.41857e-06
ENSMUSG00000040809	Chi3l3	4.31161	1.98715	58.494	2.88657e-07	9.45856e-06
ENSMUSG00000038712	Fam63a	0.48742	6.51297	57.6198	2.93296e-07	9.59198e-06
ENSMUSG00000037259	Dzank1	-1.44963	1.36837	57.586	2.9458e-07	9.60732e-06
ENSMUSG00000046805	Mpeg1	2.98583	8.66512	58.3825	2.94902e-07	9.60732e-06
ENSMUSG00000050035	Fhl4	-2.00995	-0.178719	57.5366	2.96464e-07	9.63963e-06
ENSMUSG00000021038	Vipas39	0.656112	5.67989	57.4882	2.98322e-07	9.68144e-06
ENSMUSG00000021948	Prkcd	1.37813	6.94945	57.8899	3.00354e-07	9.72872e-06
ENSMUSG00000025232	Hexa	1.06706	8.44071	57.4083	3.01421e-07	9.7446e-06
ENSMUSG00000031833	Mast3	0.922963	5.59511	57.3838	3.02379e-07	9.75692e-06
ENSMUSG00000085295	4930430E12Rik	4.56885	1.96468	58.0492	3.05365e-07	9.83449e-06
ENSMUSG00000038936	Sccpdh	-1.0221	4.86119	57.1256	3.12671e-07	1.00481e-05
ENSMUSG00000041870	Ankrd13a	0.474479	6.73891	57.1129	3.13187e-07	1.00481e-05
ENSMUSG00000001517	Foxm1	1.8181	3.42243	57.2048	3.23261e-07	1.03517e-05
ENSMUSG00000017146	Brca1	2.69929	2.72435	57.3755	3.24665e-07	1.03766e-05
ENSMUSG00000044147	Arf6	0.713404	5.90993	56.822	3.25267e-07	1.03766e-05
ENSMUSG00000035683	Melk	2.12358	2.0611	56.7689	3.27529e-07	1.04291e-05
ENSMUSG00000015947	Fcgr1	3.08932	4.86572	58.0427	3.30359e-07	1.04994e-05
ENSMUSG00000035773	Kiss1r	-1.67577	2.01036	56.6828	3.31228e-07	1.05073e-05
ENSMUSG00000022148	Fyb	2.84141	5.47972	57.9759	3.33146e-07	1.05484e-05
ENSMUSG00000006411	Pvrl4	2.01864	1.88442	56.5788	3.35765e-07	1.06114e-05
ENSMUSG00000033220	Rac2	1.58631	5.8745	57.2611	3.37657e-07	1.06513e-05
ENSMUSG00000022489	Pde1b	0.763088	5.09398	56.4342	3.4218e-07	1.07739e-05
ENSMUSG00000016946	Kctd5	0.503126	4.4754	56.3471	3.46113e-07	1.08775e-05
ENSMUSG00000067212	H2-T23	0.65852	6.76776	56.2828	3.49046e-07	1.09367e-05
ENSMUSG00000086291	Gm15513	1.56409	2.00471	56.2774	3.49292e-07	1.09367e-05
ENSMUSG00000026174	Rqcd1	0.554955	5.04588	56.151	3.55144e-07	1.10994e-05
ENSMUSG00000021108	Prkch	0.835403	5.51159	56.0468	3.60052e-07	1.11294e-05
ENSMUSG00000031907	Zfp90	0.865185	4.21953	56.0991	3.57578e-07	1.11294e-05
ENSMUSG00000034285	Nipsnap1	-1.42578	3.7342	56.1839	3.5826e-07	1.11294e-05
ENSMUSG00000038236	Hoxa7	-1.35004	4.36424	56.4149	3.59808e-07	1.11294e-05
ENSMUSG00000039953	Clstn1	-0.748615	7.09897	56.0927	3.57879e-07	1.11294e-05
ENSMUSG00000085133	B930095G15Rik	-1.66746	1.27573	56.0638	3.59245e-07	1.11294e-05
ENSMUSG00000028718	Stil	2.37093	1.5703	56.0308	3.60809e-07	1.11324e-05
ENSMUSG00000025408	Ddit3	0.973554	5.06779	56.0021	3.62179e-07	1.1134e-05
ENSMUSG00000041695	Kcnj2	1.63068	4.36894	56.6052	3.62006e-07	1.1134e-05
ENSMUSG00000017716	Birc5	2.25659	3.56757	56.701	3.62893e-07	1.11358e-05
ENSMUSG00000069793	Slfn9	1.46004	3.30458	55.9465	3.64842e-07	1.11753e-05
ENSMUSG00000021003	Galc	0.997486	5.84478	55.8784	3.68135e-07	1.12558e-05
ENSMUSG00000022803	Popdc2	-2.40157	2.95113	56.5489	3.70098e-07	1.12953e-05
ENSMUSG00000021822	Plau	1.12431	7.66143	55.7925	3.72338e-07	1.13432e-05
ENSMUSG00000046456	Tmem150b	1.68137	1.06165	55.7181	3.76018e-07	1.14347e-05
ENSMUSG00000027293	Ehd4	1.27089	7.66737	55.6976	3.77042e-07	1.14453e-05
ENSMUSG00000038167	Plekhg6	-2.2657	2.71211	56.0513	3.83225e-07	1.16121e-05
ENSMUSG00000008475	Arpc5	0.773205	7.56536	55.5518	3.84396e-07	1.16268e-05
ENSMUSG00000022390	Zc3h7b	-0.620836	6.53026	55.472	3.88487e-07	1.17295e-05
ENSMUSG00000044694	2010007H06Rik	-1.85692	2.04948	55.3945	3.92508e-07	1.18298e-05
ENSMUSG00000006304	Arpc2	0.729202	8.24027	55.3748	3.93539e-07	1.18398e-05
ENSMUSG00000015957	Wnt11	-1.40317	3.12805	55.2865	3.98189e-07	1.19584e-05
ENSMUSG00000019942	Cdk1	1.93463	3.68156	55.8357	4.02266e-07	1.20168e-05
ENSMUSG00000037112	Sik2	-1.11717	6.97427	55.2548	4.01609e-07	1.20168e-05
ENSMUSG00000042404	Dennd4b	1.24483	5.77904	55.5764	4.01826e-07	1.20168e-05
ENSMUSG00000026928	Card9	1.61451	3.70154	55.3892	4.06265e-07	1.21149e-05
[truncated: 15,359 more rows]

## Sheet: Fig5B_edgeR_NC_Cre+vsCre-_sigUP
GENEID	SYMBOL
[truncated: 80 more rows]

[truncated: 11 more sheets: Fig5B_edgeR_NC_Cre+vsCre-_sigDN, Fig5B_edgeR_NC_Cre+vsCre-_all, Fig5B_edgeR_HFD_Cre+vsCre-sigUP, Fig5B_edgeR_HFD_Cre+vsCre-sigDN, Fig5B_edgeR_HFD_Cre+vsCre-_all, Fig5B_stageR_diet-genotype_inte, Fig5C_ReactomePA_UPinCre+HFD, Fig5C_ReactomePA_DOWNinCre+HFD, Fig5D_ReactomePA_UPwithHFD, Fig5D_ReactomePA_DOWNwithHFD, IPA_Cre+vsCre-_HFD]
