# Supplementary material for: Adipocyte NR1D1 dictates adipose tissue expansion during obesity
Source: eLife. 2021 Aug 5;10:e63324. doi: 10.7554/eLife.63324 (PMC8360653; doi:10.7554/eLife.63324)
Supplement: Figure 6—source data 1. [file elife-63324-fig6-data1.xlsx]

## Sheet: Fig6A_HaloChIP_peaks
chr1	4857410	4857729
chr1	7397550	7397935
chr1	10038005	10038232
chr1	10993026	10993445
chr1	11033615	11033854
chr1	16104180	16104393
chr1	16228350	16228744
chr1	16519443	16519697
chr1	23202506	23202845
chr1	24611579	24616152
chr1	26291803	26292004
chr1	31073197	31073423
chr1	34005558	34005988
chr1	34011090	34011371
chr1	34167379	34167846
chr1	36526939	36527331
chr1	36536102	36536318
chr1	36874979	36875190
chr1	36914480	36914911
chr1	37518379	37518680
chr1	37890193	37890525
chr1	38241770	38242174
chr1	38987813	38988117
chr1	39025267	39025479
chr1	39192663	39193206
chr1	39288467	39288713
chr1	39302338	39302549
chr1	39317945	39318304
chr1	39754464	39754856
chr1	39902810	39903293
chr1	40224975	40225256
chr1	40715039	40715257
chr1	43445196	43445397
chr1	43474513	43474937
chr1	43933362	43933808
chr1	44576743	44576984
chr1	45022183	45022434
chr1	45356081	45356320
chr1	45765620	45765907
chr1	45795174	45795430
chr1	51290613	51290982
chr1	51498855	51499083
chr1	51759394	51759949
chr1	52231772	52231972
chr1	52233305	52233508
chr1	53823730	53823943
chr1	53978574	53978782
chr1	54250310	54250632
chr1	54765869	54766213
chr1	54826554	54826932
chr1	58029641	58029885
chr1	58445297	58445542
chr1	58586528	58586764
chr1	58692721	58692976
chr1	60097730	60098068
chr1	61297987	61298236
chr1	63176844	63177056
chr1	64717081	64717305
chr1	64717581	64717791
chr1	64795304	64795599
chr1	64875726	64876011
chr1	65112164	65112493
chr1	66862911	66863151
chr1	69687733	69687949
chr1	73188881	73189155
chr1	73998627	73998840
chr1	74014521	74014825
chr1	74027666	74027955
chr1	74386686	74387113
chr1	74506041	74506253
chr1	75124715	75124924
chr1	75235861	75236139
chr1	75236552	75236790
chr1	75317917	75318117
chr1	75521208	75521422
chr1	75521632	75521915
chr1	78724428	78724634
chr1	78862301	78862594
chr1	79776043	79776327
chr1	79822964	79823283
chr1	80213797	80214124
chr1	81950310	81950560
chr1	82095074	82095310
chr1	84302875	84303103
chr1	86038382	86038851
chr1	86059479	86059721
chr1	86470476	86470725
chr1	86487166	86487874
chr1	86503923	86504371
chr1	86525125	86525704
chr1	87009290	87009536
chr1	87086288	87086509
chr1	87621912	87622231
chr1	87755881	87756125
chr1	88277173	88277733
chr1	89621910	89622136
chr1	90248995	90249392
chr1	90497695	90497951
chr1	91017248	91017531
chr1	91436402	91436705
chr1	91455701	91456085
chr1	91857314	91857559
chr1	91858123	91858499
chr1	92934070	92934634
chr1	93445919	93446153
chr1	93825089	93825428
chr1	94479392	94479801
chr1	95624390	95624635
chr1	97770079	97770453
chr1	105925828	105926031
chr1	106171224	106171459
chr1	111864543	111864895
chr1	118388971	118389205
chr1	118453818	118454218
chr1	120073692	120074205
chr1	120115952	120116317
chr1	120120472	120120672
chr1	121280609	121280809
chr1	121327731	121328012
chr1	125435796	125436071
chr1	127868770	127868974
chr1	128102449	128102981
chr1	128417038	128417326
chr1	131239064	131239314
chr1	131246364	131246564
chr1	131431872	131432259
chr1	131446811	131447022
chr1	131526996	131527197
chr1	132128375	132128608
chr1	132333792	132334185
chr1	132476961	132477308
chr1	133119967	133120196
chr1	133130945	133131204
chr1	133661207	133661430
chr1	133685663	133686306
chr1	134302943	134303163
chr1	135196085	135196394
chr1	135368014	135368337
chr1	135543113	135543449
chr1	135544734	135545087
chr1	135593994	135594206
chr1	135631595	135631915
chr1	135721269	135721516
chr1	136325955	136326190
chr1	138604883	138605290
chr1	138619802	138620181
chr1	138622571	138622992
chr1	138912986	138913293
chr1	140183216	140183598
chr1	143484452	143484672
chr1	146313157	146313366
chr1	151103718	151103921
chr1	151128136	151128531
chr1	151344128	151344440
chr1	151564527	151564778
chr1	151699340	151699670
chr1	152556340	152556906
chr1	152681806	152682224
chr1	152904393	152904687
chr1	153065563	153066023
chr1	153069342	153069560
chr1	153226130	153226403
chr1	153233876	153234131
chr1	153266788	153267153
chr1	153308480	153308718
chr1	153333567	153333929
chr1	153351090	153351354
chr1	153678971	153679442
chr1	154102819	154103151
chr1	155075063	155075300
chr1	155091802	155092293
chr1	155234020	155234392
chr1	155557919	155558153
chr1	156655450	156655674
chr1	160035603	160036031
chr1	160213022	160213307
chr1	160905930	160906168
chr1	161070652	161070863
chr1	161195664	161195930
chr1	161224863	161225125
chr1	161494484	161494707
chr1	161507721	161507998
chr1	161925441	161925690
chr1	162891726	162892002
chr1	163403751	163403959
chr1	164502353	164502624
chr1	164798505	164798892
chr1	164809506	164809860
chr1	165237140	165237462
chr1	165460674	165461880
chr1	165763341	165763570
chr1	166003041	166003351
chr1	167393877	167394134
chr1	168234621	168234847
chr1	170182698	170182956
chr1	170188492	170188911
chr1	170535384	170535597
chr1	170694785	170695066
chr1	170703115	170703370
chr1	170867520	170867842
chr1	171111081	171111393
chr1	171247015	171247651
chr1	171247945	171248256
chr1	171251379	171252006
chr1	171294593	171294886
chr1	171452907	171453195
chr1	172082582	172082881
chr1	172281605	172281837
chr1	172282440	172282764
chr1	172520645	172521161
chr1	172525055	172525649
chr1	173550577	173550985
chr1	176800871	176801179
chr1	176814192	176814667
chr1	178236017	178236232
chr1	178318197	178318584
chr1	178369062	178369697
chr1	178376990	178377250
chr1	179560949	179561192
chr1	180250198	180250541
chr1	180365374	180365578
chr1	180768405	180768646
chr1	180811713	180812081
chr1	180849280	180849565
chr1	180936787	180937015
chr1	181009696	181009944
chr1	181257004	181257343
chr1	181529426	181529628
chr1	182124968	182125217
chr1	182489922	182490187
chr1	182959869	182960315
chr1	183055642	183055928
chr1	183905455	183906011
chr1	184033912	184034132
chr1	184447103	184447569
chr1	184448020	184448443
chr1	184622020	184622284
chr1	184827372	184827672
chr1	184846033	184846284
chr1	185363420	185363976
chr1	185587818	185588150
chr1	187215204	187215581
chr1	191073040	191073486
chr1	191123723	191124159
chr1	191296507	191296712
chr1	191397405	191397674
chr1	191495179	191495489
chr1	191575805	191576031
chr1	192887191	192887406
chr1	193173331	193173877
chr1	193625663	193626020
chr1	194658367	194658589
chr1	194677989	194678252
chr1	195034109	195034338
chr1	195131342	195131629
chr10	3110014	3110371
chr10	3111481	3111945
chr10	3112635	3113278
chr10	3113482	3113776
chr10	3114907	3115242
chr10	3116216	3116946
chr10	3516541	3516849
chr10	3551243	3551490
chr10	3931935	3932239
chr10	3941390	3941615
chr10	3943759	3944159
chr10	4002209	4002493
chr10	4135380	4135711
chr10	4282418	4282654
chr10	4481756	4482007
chr10	4553728	4554188
chr10	4683117	4683330
chr10	4775902	4776265
chr10	5805575	5805851
chr10	7118342	7118714
chr10	7212379	7212832
chr10	8454247	8454459
chr10	8658292	8658579
chr10	8742799	8743076
chr10	8752541	8752824
chr10	8762325	8762561
chr10	8768732	8769015
chr10	8818005	8818255
chr10	10321101	10321319
chr10	11280890	11281220
chr10	12755135	12755353
chr10	12964354	12964580
chr10	13964517	13964913
chr10	13983071	13983310
chr10	14130359	14130566
chr10	16860183	16860430
chr10	17075617	17075856
chr10	17477057	17477428
chr10	17727355	17727792
chr10	18508677	18508883
chr10	19009235	19009547
chr10	19563400	19563821
chr10	19627521	19628242
chr10	20073174	20073626
chr10	20311823	20312195
chr10	21573763	21574001
chr10	21609538	21610016
chr10	21628600	21628871
chr10	21857767	21857975
chr10	22588096	22588305
chr10	25280190	25280450
chr10	26772587	26772798
chr10	26890306	26890549
chr10	29313006	29313270
chr10	30618196	30618410
chr10	30768306	30768594
chr10	31312843	31313109
chr10	34418243	34418548
chr10	37047882	37048284
chr10	37138019	37138241
chr10	37140274	37140532
chr10	38994138	38994443
chr10	40257610	40258097
chr10	40327982	40328325
chr10	40883126	40883382
chr10	41304126	41304343
chr10	41893736	41894216
chr10	41934585	41934827
chr10	42251126	42251568
chr10	42277697	42278125
chr10	42478182	42478723
chr10	43562776	43563017
chr10	43575089	43575325
chr10	43901665	43902037
chr10	53407597	53407828
chr10	53801168	53801431
chr10	53875997	53876324
chr10	56228889	56229224
chr10	57532262	57532522
chr10	57794512	57794787
chr10	59911645	59911859
chr10	59915952	59916456
chr10	59968737	59968965
chr10	59969989	59970312
chr10	59974159	59975010
chr10	59978920	59979393
chr10	60282667	60283005
chr10	60346813	60347119
chr10	60732435	60732708
chr10	61278151	61278382
chr10	61447660	61447860
chr10	61658070	61658327
chr10	61720234	61720641
chr10	62340301	62340513
chr10	62480348	62480558
chr10	62650941	62651179
chr10	62792356	62792699
chr10	63024145	63024435
chr10	63880494	63880743
chr10	67058495	67058857
chr10	67116343	67116570
chr10	67287927	67288289
chr10	67291289	67291518
chr10	67537261	67537743
chr10	67549134	67549677
chr10	67785654	67785915
chr10	68090464	68090778
chr10	68092407	68092790
chr10	68103563	68103763
chr10	69219110	69219332
chr10	69258710	69259185
chr10	70184095	70184355
chr10	70824275	70824809
chr10	70924419	70924727
chr10	75151354	75151592
chr10	75504382	75504589
chr10	75517734	75517973
chr10	75837251	75837617
chr10	75944296	75944610
chr10	76531493	76531709
chr10	76648782	76649102
chr10	76664635	76664963
chr10	76735038	76735251
chr10	77022565	77022931
chr10	77206635	77207137
chr10	77259000	77259558
chr10	77406617	77407111
chr10	77509676	77509926
chr10	77613378	77613881
chr10	78297646	78297996
chr10	78328192	78328456
chr10	78360238	78360442
chr10	78362045	78362303
chr10	78458778	78459094
chr10	78464838	78465248
chr10	78574492	78574792
chr10	79681778	79681994
chr10	79794168	79795026
chr10	79853987	79854502
chr10	79925352	79925600
chr10	79934381	79934738
chr10	79937096	79937555
chr10	79986576	79986898
chr10	80114694	80115085
chr10	80167285	80167866
chr10	80248809	80249470
chr10	80320216	80320553
chr10	80433788	80434106
chr10	80664694	80664992
chr10	80741020	80741566
chr10	80757692	80758017
chr10	80798640	80798887
chr10	81169168	81169583
chr10	81176222	81176477
chr10	81182754	81183225
chr10	81266499	81266935
chr10	81320833	81321359
chr10	81401967	81402540
chr10	81411483	81411898
chr10	81413863	81414153
chr10	81606357	81606690
chr10	81627284	81627798
chr10	81863834	81864189
chr10	81997072	81997285
chr10	83637416	83637794
chr10	84172992	84173300
chr10	84576636	84577631
chr10	84851964	84852307
chr10	85161542	85162172
chr10	85185124	85185369
chr10	86339696	86340019
chr10	86705788	86706192
chr10	86778559	86778814
chr10	87718475	87718923
chr10	88372524	88372738
chr10	88731060	88731427
chr10	89732149	89732403
chr10	91181419	91181697
chr10	93130654	93131015
chr10	93255491	93255737
chr10	93294921	93295135
chr10	93432563	93432958
chr10	93488549	93488752
chr10	94398303	94398522
chr10	94414020	94414495
chr10	94462485	94462695
chr10	94479760	94480053
chr10	94520979	94521288
chr10	94549751	94549965
chr10	94990820	94991502
chr10	95142930	95143306
chr10	95318020	95318648
chr10	95361376	95361621
chr10	95417532	95418236
chr10	96618266	96618470
chr10	96750055	96750298
chr10	96828831	96829197
chr10	99262971	99263191
chr10	99461037	99461457
chr10	105841205	105841473
chr10	107943843	107944133
chr10	108200620	108200966
chr10	110953045	110953425
chr10	111010777	111011055
chr10	115328846	115329102
chr10	117063513	117063771
chr10	117224312	117224668
chr10	117746425	117746707
chr10	117846179	117846430
chr10	118737155	118737360
chr10	118749927	118750226
chr10	120112741	120113096
chr10	121573329	121573922
chr10	121703638	121703926
chr10	122291484	122291687
chr10	122794275	122794574
chr10	126905693	126905957
chr10	126978662	126978982
chr10	127291169	127291403
chr10	127312269	127312584
chr10	127380173	127380400
chr10	127612991	127613269
chr10	127621415	127622370
chr10	127644024	127644368
chr10	128035336	128035787
chr10	128058589	128058876
chr10	128176695	128176955
chr10	128368396	128368659
chr10	128493891	128494167
chr10	128498583	128498794
chr10	128526225	128526552
chr10	128626067	128626443
chr11	3452075	3452520
chr11	3514507	3514788
chr11	3535434	3535729
chr11	3539720	3539928
chr11	3649058	3649320
chr11	3903058	3903539
chr11	3963429	3963940
chr11	4096501	4097012
chr11	4189726	4189942
chr11	4190574	4190857
chr11	4849565	4849946
chr11	4882968	4883531
chr11	5068471	5068692
chr11	5421928	5422274
chr11	5509866	5510208
chr11	5542035	5542574
chr11	6444574	6444931
chr11	6476234	6476448
chr11	7815625	7816246
chr11	8214419	8214773
chr11	9011068	9011295
chr11	11809022	11809315
chr11	11844553	11844851
chr11	11965645	11965949
chr11	16525211	16525467
chr11	16591343	16591955
chr11	16795017	16795275
chr11	16800592	16800954
chr11	19424005	19424371
chr11	19924135	19924416
chr11	20231271	20231495
chr11	20632970	20633266
chr11	20741575	20741899
chr11	20858920	20859474
chr11	20872665	20873340
chr11	21415006	21415218
chr11	22437556	22437838
chr11	22859829	22860282
chr11	22990485	22990909
chr11	23067550	23068008
chr11	23770670	23770924
chr11	29172647	29173092
chr11	29547657	29548136
chr11	29808518	29808728
chr11	30161188	30161430
chr11	30166326	30166599
chr11	30209615	30209946
chr11	30405403	30405709
chr11	30517192	30517983
chr11	30649087	30649537
chr11	30954486	30954954
chr11	31617180	31617475
chr11	31807584	31807872
chr11	31861569	31861886
chr11	32267367	32267821
chr11	32375230	32375528
chr11	32605265	32605585
chr11	33007401	33007687
chr11	34845617	34845890
chr11	34868884	34869273
chr11	35196518	35196914
chr11	35198675	35198876
chr11	35231977	35232573
chr11	43549173	43549421
chr11	43681535	43681982
chr11	44173058	44173536
chr11	45071378	45071649
chr11	48799705	48799973
chr11	48856661	48856985
chr11	49050205	49050431
chr11	49243749	49244076
chr11	49712899	49713491
chr11	50769509	50769751
chr11	51584463	51584957
chr11	51606827	51607269
chr11	51615382	51615699
chr11	51681570	51681806
chr11	51688437	51689223
chr11	51858528	51858913
chr11	52000270	52000928
chr11	52533521	52533742
chr11	53308614	53309172
chr11	53758221	53758567
chr11	53763728	53764133
chr11	53769952	53770271
chr11	54007080	54007290
chr11	54008388	54008736
chr11	54090515	54090745
chr11	54881095	54881349
chr11	55077275	55077569
chr11	55240589	55240897
chr11	55428032	55428271
chr11	57980800	57981097
chr11	58103999	58104210
chr11	58301928	58302150
chr11	59163208	59163674
chr11	59202413	59202660
chr11	59450107	59450409
chr11	59663924	59664343
chr11	60046314	60046663
chr11	60210233	60210714
chr11	60352496	60352840
chr11	60454349	60454560
chr11	60537206	60537506
chr11	60728478	60728832
chr11	60879100	60879349
chr11	61408704	61408985
chr11	61616522	61616897
chr11	62047897	62048183
chr11	62248668	62248883
chr11	62458268	62458562
chr11	62494622	62495085
chr11	62552483	62552741
chr11	62559031	62559333
chr11	62602932	62603245
chr11	62820973	62821344
chr11	62921215	62921499
chr11	63026483	63027014
chr11	63173247	63173486
chr11	64079428	64079933
chr11	67526785	67527002
chr11	67667828	67668167
chr11	68058581	68058993
chr11	68733416	68733886
chr11	68864747	68865373
chr11	69037404	69037778
chr11	69062663	69062951
chr11	69073330	69073605
chr11	69096709	69097274
chr11	69117812	69118361
chr11	69395259	69396303
chr11	69417621	69418251
chr11	69579287	69579489
chr11	69581128	69581696
chr11	69613897	69614103
chr11	69662385	69662620
chr11	69685624	69686100
chr11	69757822	69758106
chr11	69803771	69803998
chr11	70020671	70020989
chr11	70221283	70221822
chr11	70230364	70230671
chr11	70237905	70238218
chr11	70412076	70412302
chr11	70432794	70433053
chr11	70459504	70459759
chr11	70647503	70647910
chr11	70655169	70655421
chr11	70668434	70668669
chr11	70730510	70730850
chr11	71004638	71004873
chr11	72606897	72607131
chr11	72690012	72690355
chr11	72952273	72952476
chr11	73177287	73177499
chr11	74650251	74650478
chr11	74830069	74830852
chr11	74838679	74838930
chr11	75046955	75047369
chr11	75051688	75051984
chr11	75139187	75139477
chr11	75454850	75455157
chr11	75460317	75460560
chr11	75460784	75460984
chr11	75462667	75463341
chr11	75648061	75648265
chr11	76314087	76314450
chr11	76406698	76407246
chr11	76510398	76510731
chr11	76717823	76718087
chr11	76762496	76762704
chr11	76795365	76795670
chr11	76945279	76945692
chr11	76953861	76954088
chr11	77372569	77372821
chr11	77442174	77442440
chr11	77442756	77443010
chr11	77444922	77445490
chr11	77513560	77513799
chr11	77607828	77608093
chr11	78094241	78094575
chr11	78176273	78176795
chr11	78183254	78183599
chr11	78245787	78246158
chr11	78411861	78412270
chr11	79081062	79081319
chr11	79224598	79225217
chr11	79719196	79719426
chr11	79722837	79723045
chr11	79825931	79826183
chr11	80949160	80949409
chr11	80974079	80974924
chr11	82006808	82007156
chr11	82032939	82033247
chr11	82951180	82951484
chr11	83291399	83291719
chr11	83298797	83299434
chr11	83302875	83303109
chr11	84916191	84916522
chr11	85139494	85139705
chr11	85719889	85720108
chr11	86484081	86484426
chr11	86757203	86757684
chr11	86813185	86813545
chr11	86920272	86920645
chr11	87108983	87109301
chr11	87442729	87443301
chr11	87462099	87462574
chr11	87470960	87471548
chr11	87736959	87737222
chr11	88047319	88047698
chr11	88151500	88151751
chr11	88172989	88173223
chr11	88187580	88187996
chr11	88718671	88719016
chr11	88901476	88901758
chr11	89024489	89024722
chr11	89229515	89229780
chr11	90259176	90259431
chr11	90355286	90355797
chr11	90417947	90418255
chr11	93885907	93886177
chr11	94161456	94161680
chr11	94212365	94212658
chr11	94543919	94544196
chr11	94589566	94589892
chr11	94630689	94631005
chr11	94913318	94913915
chr11	94928700	94929046
chr11	94994314	94994638
chr11	95089204	95089435
chr11	95365391	95365901
chr11	95370124	95370326
chr11	95384640	95384873
chr11	95405890	95406166
chr11	95412749	95412993
chr11	95413413	95413883
chr11	95414680	95415225
chr11	95421152	95421445
chr11	95712504	95712715
chr11	95778878	95779120
chr11	95859019	95859240
chr11	96301912	96302151
chr11	96413635	96413902
chr11	96705337	96705555
chr11	96765798	96766059
chr11	96777700	96778010
chr11	96825045	96825301
chr11	97041826	97042081
chr11	97315294	97315824
chr11	97435102	97435365
chr11	97987655	97988354
chr11	98347258	98347542
chr11	98438737	98439007
chr11	98550632	98550970
chr11	98682429	98682631
chr11	98740543	98740816
chr11	98751284	98751541
chr11	98754819	98755183
chr11	98773040	98773269
chr11	98773523	98773847
chr11	98774255	98774475
chr11	98775089	98775554
chr11	98783112	98783826
chr11	98785651	98786404
chr11	98788974	98789348
chr11	98942006	98942280
chr11	98942508	98942854
chr11	99039841	99040090
chr11	99230468	99230741
chr11	99370142	99370490
chr11	99386283	99386552
chr11	100320628	100320893
chr11	100323583	100323872
chr11	100391161	100391418
chr11	100395028	100395369
chr11	100738031	100738396
chr11	100964116	100964327
chr11	100970513	100971197
chr11	100983383	100983663
chr11	101231866	101232146
chr11	101278797	101279134
chr11	101330241	101330589
chr11	101403968	101404192
chr11	101442195	101442638
chr11	101448356	101448653
chr11	101587718	101587983
chr11	101641581	101642079
chr11	101645645	101646492
chr11	101658700	101658900
chr11	101664948	101665223
chr11	101732466	101732881
chr11	101986107	101986326
chr11	102040199	102040582
chr11	102051524	102051740
chr11	102309066	102309412
chr11	102407752	102408604
chr11	102465898	102466111
chr11	102556217	102556484
chr11	102881003	102881291
chr11	103028321	103028779
chr11	103102721	103103264
chr11	103116478	103116763
chr11	103117089	103117328
chr11	104440740	104441086
chr11	104442517	104442813
chr11	104625541	104625781
chr11	105363119	105363330
chr11	105574339	105574572
chr11	105592113	105592397
chr11	105907455	105907707
chr11	106065875	106066185
chr11	106083939	106084441
chr11	106134632	106135455
chr11	106216468	106216873
chr11	106269154	106269393
chr11	106272772	106273162
chr11	106276320	106276688
chr11	106659682	106660063
chr11	106675386	106675629
chr11	106737143	106737480
chr11	106779421	106779655
chr11	106789034	106789433
chr11	107012555	107012943
chr11	107189016	107189299
chr11	107784737	107785084
chr11	108061631	108062039
chr11	108425057	108425261
chr11	108997834	108998153
chr11	109011725	109012042
chr11	109040252	109040607
chr11	109347616	109347839
chr11	109362340	109362548
chr11	109860166	109860383
chr11	109926925	109927304
chr11	110942878	110943099
chr11	113684228	113684448
chr11	113703831	113704043
chr11	113778844	113779048
chr11	114850797	114851277
chr11	115420647	115420982
chr11	115475548	115475837
chr11	115564234	115564458
chr11	115612709	115613195
chr11	115628403	115628757
chr11	115692318	115692555
chr11	115765241	115765503
chr11	115779284	115779486
chr11	115955137	115955535
chr11	116030664	116030970
chr11	116100534	116100782
chr11	116104292	116104659
chr11	116199039	116199338
chr11	116306544	116306984
chr11	116433717	116434039
chr11	116490398	116490657
chr11	116621244	116621540
chr11	116754136	116754388
chr11	116843525	116843874
chr11	117081616	117082490
chr11	117108708	117108908
chr11	117315271	117315566
chr11	117343950	117344154
chr11	117414732	117414992
chr11	117962253	117962716
chr11	117962975	117963577
chr11	118401691	118402248
chr11	118423896	118424133
chr11	118448381	118448735
chr11	119134067	119134317
chr11	119354977	119355326
chr11	119904883	119905133
chr11	119983190	119983398
chr11	120086937	120087212
chr11	120184981	120185532
chr11	120231492	120231727
chr11	120348910	120349148
chr11	120350297	120350609
chr11	120378868	120379310
chr11	120484543	120484807
chr11	120573109	120573497
chr11	120598425	120598786
chr11	120796218	120796834
chr11	120824531	120824773
chr11	121451731	121451971
chr11	121658296	121658560
chr11	121673010	121673251
chr11	121673490	121673754
chr11	121702096	121702341
chr12	3426390	3426737
chr12	4080355	4080565
chr12	4220942	4221518
chr12	4769056	4769333
chr12	4843711	4843936
chr12	5191836	5192069
chr12	8208038	8208351
chr12	8326994	8327252
chr12	8345014	8345222
chr12	8365476	8365700
chr12	8379956	8380192
chr12	8432951	8433400
chr12	8453171	8453571
chr12	8502698	8503096
chr12	8921430	8921802
chr12	9029834	9030119
chr12	11265646	11265991
chr12	14015292	14015514
chr12	16837839	16838081
chr12	16850788	16851376
chr12	17746766	17747224
chr12	21142911	21143136
chr12	21370507	21370799
chr12	24642355	24642626
chr12	26361166	26361476
chr12	28635651	28636261
chr12	29290765	29291327
chr12	29971774	29972006
chr12	30023642	30023872
chr12	30885911	30886509
chr12	31499647	31499960
chr12	31950187	31950584
chr12	32535271	32535499
chr12	32819695	32819983
chr12	32878104	32878365
chr12	32890564	32890799
chr12	33147822	33148095
chr12	33311828	33312146
chr12	33380134	33380339
chr12	36156898	36157503
chr12	40037161	40037619
chr12	40445475	40445738
chr12	40559197	40559401
chr12	44453774	44454091
chr12	47164324	47164583
chr12	51377546	51377770
chr12	51692162	51692373
chr12	51845014	51845260
chr12	52396449	52396749
chr12	52433988	52434275
chr12	52503428	52503672
chr12	54683053	54683318
chr12	54696558	54696969
chr12	54738532	54738882
chr12	55124095	55124324
chr12	55155048	55155584
chr12	55229906	55230431
chr12	55302651	55303159
chr12	55835849	55836133
chr12	56010079	56010323
chr12	59037792	59038092
chr12	69371759	69372402
chr12	69458419	69458667
chr12	69501890	69502180
chr12	69725001	69725366
chr12	69751879	69752345
chr12	70059472	70059768
chr12	70235190	70235426
chr12	70654719	70654961
chr12	70826702	70827043
chr12	71136693	71136919
chr12	71863972	71864246
chr12	72085749	72086105
chr12	72535991	72536220
chr12	72664787	72665080
chr12	73286613	73286999
chr12	73725906	73726360
chr12	73779349	73779625
chr12	73786819	73787183
chr12	73904889	73905324
chr12	75304193	75304710
chr12	76615151	76615522
chr12	76837354	76837661
chr12	76883852	76884103
chr12	76962246	76962497
chr12	78205783	78206397
chr12	78225789	78226448
chr12	78249108	78249382
chr12	78861615	78861982
chr12	79172494	79172719
chr12	79296052	79296544
chr12	79356262	79356513
chr12	79535635	79535869
chr12	79600105	79600435
chr12	79793497	79793715
chr12	79854151	79854377
chr12	80131819	80132489
chr12	80230000	80230254
chr12	80643841	80644124
chr12	80846857	80847076
chr12	80945317	80945533
chr12	81133167	81133454
chr12	81594789	81595072
chr12	81816839	81817313
chr12	81822213	81822525
chr12	83591990	83592231
chr12	84174561	84175026
chr12	84214543	84214755
chr12	84285002	84285338
chr12	84316738	84317001
chr12	84450968	84451444
chr12	84617512	84617864
chr12	84772359	84772773
chr12	84773092	84773473
chr12	85532644	85533260
chr12	85758791	85759017
chr12	85824731	85824949
chr12	85974004	85974257
chr12	86091578	86091849
chr12	86770344	86770647
chr12	86801102	86801433
chr12	86825053	86825299
chr12	86833683	86833920
chr12	86836882	86837121
chr12	86868055	86868289
chr12	86887922	86888678
chr12	86932355	86932617
chr12	86936717	86937055
chr12	86946984	86947264
chr12	86968569	86968788
chr12	87147235	87147486
chr12	87266464	87266687
chr12	87388266	87388782
chr12	91384417	91384746
chr12	91588259	91588842
chr12	97061456	97061786
chr12	99097125	99097796
chr12	99336397	99336743
chr12	99883238	99883595
chr12	100122723	100122983
chr12	100467241	100467652
chr12	100527874	100528211
chr12	100626389	100626863
chr12	100724889	100725717
chr12	102276027	102276420
chr12	104752184	104752430
chr12	105032311	105032553
chr12	108179469	108179703
chr12	108832262	108832625
chr12	110575881	110576278
chr12	111442756	111442978
chr12	111461495	111461723
chr12	111524797	111525078
chr12	111538978	111539238
chr12	111668465	111668762
chr12	111725927	111726194
chr12	111732539	111732763
chr12	111795188	111795501
chr12	112121324	112121590
chr12	112490593	112490809
chr12	113000962	113001226
chr12	116231426	116231957
chr13	4608980	4609219
chr13	5604322	5604526
chr13	5614209	5614443
chr13	5714184	5714509
chr13	6059661	6060232
chr13	6240722	6241093
chr13	8996021	8996527
chr13	9578499	9578760
chr13	12408748	12409057
chr13	13438413	13438726
chr13	13589726	13590113
chr13	14613172	14613672
chr13	17695117	17695364
chr13	17837661	17837861
chr13	20232198	20232441
chr13	21169733	21169933
chr13	21179737	21180270
chr13	21362525	21362988
chr13	21408186	21408504
chr13	21478916	21479231
chr13	21710289	21710976
chr13	23431439	23431776
chr13	23445880	23446207
chr13	23446648	23446894
chr13	23531087	23531489
chr13	23556378	23556667
chr13	23732525	23732777
chr13	23739586	23739809
chr13	24287431	24287649
chr13	24338072	24338291
chr13	24761621	24761868
chr13	28416271	28416553
chr13	28532399	28532697
chr13	28638262	28638473
chr13	30259953	30260227
chr13	30501807	30502240
chr13	30720327	30720564
chr13	30974097	30974369
chr13	34162790	34163204
chr13	34249418	34249812
chr13	34365193	34365511
chr13	34652873	34653240
chr13	34708979	34709194
chr13	34726090	34726489
chr13	34789243	34789502
chr13	35463224	35463567
chr13	35463870	35464174
chr13	37462159	37462401
chr13	37779060	37779419
chr13	37924390	37924738
chr13	38037176	38037431
chr13	38410539	38410800
chr13	38642511	38642776
chr13	40843526	40843801
chr13	40901345	40901614
chr13	40968673	40968895
chr13	41000381	41000759
chr13	41016337	41016680
chr13	41341633	41341850
chr13	41476240	41476470
chr13	41487231	41487463
chr13	41517253	41517551
chr13	41662555	41662823
chr13	42051311	42051676
chr13	42367793	42368136
chr13	42403165	42403560
chr13	42575960	42576214
chr13	43232197	43232833
chr13	43481601	43481810
chr13	43560390	43560710
chr13	44306500	44306732
chr13	44409580	44409866
chr13	44477005	44477258
chr13	44731019	44731251
chr13	44840126	44840491
chr13	45001378	45001605
chr13	45030889	45031174
chr13	45389295	45389512
chr13	45477306	45477550
chr13	47154916	47155282
chr13	48566457	48566675
chr13	48865130	48865395
chr13	48962620	48962848
chr13	49054507	49054772
chr13	49364796	49365010
chr13	49381306	49381520
chr13	49461201	49461838
chr13	49546719	49546922
chr13	49652865	49653286
chr13	50780136	50780435
chr13	51871005	51871433
chr13	51930292	51930604
chr13	51945989	51946250
chr13	52024408	52024696
chr13	52222202	52222434
chr13	52805461	52805783
chr13	52979498	52979776
chr13	52980422	52980943
chr13	53008728	53008972
chr13	54199269	54199475
chr13	54693879	54694108
chr13	54694441	54694794
chr13	58129060	58129306
chr13	58216386	58216703
chr13	58402277	58402525
chr13	58920923	58921598
chr13	59584930	59585279
chr13	59769892	59770166
chr13	60016101	60016408
chr13	60298605	60298879
chr13	60497686	60497947
chr13	60508088	60508457
chr13	60595450	60595874
chr13	60654207	60654441
chr13	60681132	60681742
chr13	60701776	60702291
chr13	60707571	60708153
chr13	62927430	62927644
chr13	63046803	63047012
chr13	63564925	63565289
chr13	64370361	64370694
chr13	64401175	64401626
chr13	64401933	64402239
chr13	65107676	65107878
chr13	65240913	65241366
chr13	67332473	67332700
chr13	67360458	67360680
chr13	67552952	67553267
chr13	67754822	67755260
chr13	68793285	68793532
chr13	68889028	68889265
chr13	69534746	69535212
chr13	69623993	69624276
chr13	70590136	70590846
chr13	70789175	70789406
chr13	73971135	73971439
chr13	74463234	74463440
chr13	75830729	75831072
chr13	80940548	80941148
chr13	81136565	81136819
chr13	85289520	85289843
chr13	86046509	86047012
chr13	90464135	90464667
chr13	90515929	90516316
chr13	91371200	91371413
chr13	91460446	91460817
chr13	92531109	92531324
chr13	92589282	92589566
chr13	93192439	93192992
chr13	93910876	93911330
chr13	93967011	93967219
chr13	94050190	94050475
chr13	95777376	95777584
chr13	96387826	96388085
chr13	96593625	96593834
chr13	96670769	96671077
chr13	97137699	97138266
chr13	97205257	97205488
chr13	97240352	97240748
chr13	97484827	97485048
chr13	97798283	97798538
chr13	98819147	98819358
chr13	98944613	98944973
chr13	99124965	99125217
chr13	99307960	99308205
chr13	100006056	100006345
chr13	100786748	100786980
chr13	101092553	101092753
chr13	101767786	101768159
chr13	101811645	101812345
chr13	102014192	102014574
chr13	102253652	102253895
chr13	102625262	102625948
chr13	102877115	102877338
chr13	102933744	102934003
chr13	103270854	103271082
chr13	104939879	104940140
chr13	107831329	107831593
chr13	111788369	111788584
chr13	111796751	111797256
chr13	112023353	112023619
chr13	112463538	112463949
chr13	112541780	112541989
chr13	112660590	112660873
chr13	112987571	112988022
chr13	113355036	113355251
chr13	113949767	113950084
chr13	114387615	114388147
chr13	114637015	114637439
chr13	114655095	114655421
chr13	114818638	114818873
chr13	114964222	114964496
chr13	115090227	115090894
chr13	119689709	119689943
chr13	119716080	119716319
chr14	7870956	7871464
chr14	8080259	8080462
chr14	8095688	8095914
chr14	8099838	8100053
chr14	8173212	8173582
chr14	9697387	9697609
chr14	13981323	13981641
chr14	14012227	14012617
chr14	14345703	14345987
chr14	14832990	14833301
chr14	18238513	18238784
chr14	18270773	18271284
chr14	19709882	19710233
chr14	19769515	19769782
chr14	20347897	20348600
chr14	20393446	20393922
chr14	20707176	20707443
chr14	20892175	20892449
chr14	21032158	21032441
chr14	21052151	21052431
chr14	22019297	22019662
chr14	22215905	22216226
chr14	23084869	23085300
chr14	24490352	24490875
chr14	24565677	24565948
chr14	25245675	25245929
chr14	25304407	25304789
chr14	25313111	25313497
chr14	25460294	25460872
chr14	25461312	25461569
chr14	25462339	25462740
chr14	25488078	25488497
chr14	25496223	25496489
chr14	25579459	25579968
chr14	26580078	26580299
chr14	26637639	26638047
chr14	27145141	27145358
chr14	27166800	27167023
chr14	27508328	27508535
chr14	29978429	29978758
chr14	30593301	30593976
chr14	30626303	30626710
chr14	30651139	30651364
chr14	30695448	30695735
chr14	30888212	30888440
chr14	31018726	31019023
chr14	31127985	31128356
chr14	31422792	31423026
chr14	31494858	31495246
chr14	31644342	31644644
chr14	31903694	31903944
chr14	31930518	31930796
chr14	31957289	31957729
chr14	31961477	31961826
chr14	32028585	32028908
chr14	32085436	32085728
chr14	32201335	32201940
chr14	33247878	33248131
chr14	33322681	33322900
chr14	33865832	33866198
chr14	34554042	34554420
chr14	36968886	36969101
chr14	37112934	37113247
chr14	40894539	40894865
chr14	40905903	40906143
chr14	40924706	40924944
chr14	43925062	43925566
chr14	45219168	45219426
chr14	45455886	45456096
chr14	45477847	45478231
chr14	46821356	46821581
chr14	46831656	46831929
chr14	46966455	46966767
chr14	47177858	47178113
chr14	47568521	47568805
chr14	47959534	47959908
chr14	50944095	50944725
chr14	50956566	50956823
chr14	50957623	50957854
chr14	50998261	50998464
chr14	52295800	52296090
chr14	52304938	52305237
chr14	54443939	54444283
chr14	54685816	54686366
chr14	54882926	54883138
chr14	54893636	54893841
chr14	55014875	55015221
chr14	55478538	55478951
chr14	55591306	55591769
chr14	55660157	55660495
chr14	56571969	56572173
chr14	56668163	56668426
chr14	56887965	56888270
chr14	57423790	57424036
chr14	57571333	57571826
chr14	57746338	57746539
chr14	57882101	57882361
chr14	57910484	57910742
chr14	57999307	57999521
chr14	59440641	59440841
chr14	60251608	60251868
chr14	60682486	60682983
chr14	60693598	60693857
chr14	61439967	61440234
chr14	62541801	62542022
chr14	62761026	62761240
chr14	62838566	62839066
chr14	62880109	62880375
chr14	63132161	63132394
chr14	64099572	64100210
chr14	64440668	64441282
chr14	65113443	65113673
chr14	65345502	65345876
chr14	65592709	65593012
chr14	65720477	65720732
chr14	66296678	66296998
chr14	66845871	66846260
chr14	67008794	67009166
chr14	67101038	67101253
chr14	67188485	67188896
chr14	67358255	67358503
chr14	69162187	69162427
chr14	69692276	69692622
chr14	70153459	70153862
chr14	70206369	70206677
chr14	70541009	70541211
chr14	70555403	70555645
chr14	70563274	70563503
chr14	73258288	73258502
chr14	73385504	73385791
chr14	73473922	73474336
chr14	73475661	73475970
chr14	73524919	73525262
chr14	75015922	75016222
chr14	75826849	75827229
chr14	75834059	75834287
chr14	75863606	75863903
chr14	76110753	76111077
chr14	76149725	76150003
chr14	76152413	76152766
chr14	76528696	76528974
chr14	76708668	76709041
chr14	76876013	76876295
chr14	77485034	77485454
chr14	79467625	79467840
chr14	79504339	79504770
chr14	89609930	89610150
chr14	98067506	98067972
chr14	101609115	101609322
chr14	101640498	101640740
chr14	101653692	101653945
chr14	102922593	102922806
chr14	102982908	102983153
chr14	103346854	103347213
chr14	103349502	103349830
chr14	103463903	103464706
chr14	105732259	105732583
chr14	105744208	105744925
chr14	105950985	105951252
chr14	109728294	109728555
chr14	118089481	118089704
chr14	119007218	119007419
chr14	120502650	120502851
chr14	121379505	121379707
chr14	121391935	121392311
chr14	121423305	121423607
chr14	121526724	121527012
chr14	121713648	121713998
chr14	121824682	121824925
chr14	121878264	121878482
chr14	122534157	122534495
chr14	123201867	123202090
chr14	124801653	124802086
chr15	3270491	3271375
chr15	3580274	3580482
chr15	5347809	5348118
chr15	6081699	6082007
chr15	6874355	6874585
chr15	9015917	9016263
chr15	9864831	9865185
chr15	10287087	10287314
chr15	10645529	10645775
chr15	10818285	10818526
chr15	11116409	11116664
chr15	11399863	11400174
chr15	12566996	12567315
chr15	13197996	13198218
chr15	25622109	25622322
chr15	25679144	25679439
chr15	25773915	25774222
chr15	25774862	25775148
chr15	25886523	25886880
chr15	25948301	25948568
chr15	30952258	30952463
chr15	31589082	31589289
chr15	32339227	32339823
chr15	33426805	33427054
chr15	34046509	34047047
chr15	34082273	34082718
chr15	34215657	34215887
chr15	34237852	34238218
chr15	34339176	34339453
chr15	34373058	34373512
chr15	36283317	36283703
chr15	36296927	36297276
chr15	36472640	36472862
chr15	36499781	36500392
chr15	36716171	36716496
chr15	36792564	36792856
chr15	38470267	38470750
chr15	38473438	38473756
chr15	39078640	39078874
chr15	40913371	40913650
chr15	42427777	42428018
chr15	42628690	42628891
chr15	50361905	50362143
chr15	52005883	52006188
chr15	53271624	53271871
chr15	54768371	54768668
chr15	55002525	55002839
chr15	55090213	55090721
chr15	55196416	55196701
chr15	56143131	56143450
chr15	57892446	57892971
chr15	58135083	58135565
chr15	58823523	58823826
chr15	59018423	59018755
chr15	59278863	59279221
chr15	59480709	59481088
chr15	59549187	59549729
chr15	59607545	59607758
chr15	59777551	59777753
chr15	60892950	60893160
chr15	61941990	61942260
chr15	62079420	62079930
chr15	62279730	62279985
chr15	62328271	62328670
chr15	63364516	63364773
chr15	65786275	65786936
chr15	67101248	67101625
chr15	67110497	67110920
chr15	67899016	67899292
chr15	67940674	67940903
chr15	68258201	68258475
chr15	68706193	68706477
chr15	71927244	71927578
chr15	73061001	73061275
chr15	73137100	73137361
chr15	73446988	73447330
chr15	74923579	74924045
chr15	74968060	74968514
chr15	75642047	75642596
chr15	76069784	76070003
chr15	76189604	76189997
chr15	76477072	76477285
chr15	76607366	76607686
chr15	76659963	76660176
chr15	76696578	76696829
chr15	76701006	76701350
chr15	76702012	76702270
chr15	76723943	76724231
chr15	76899618	76900393
chr15	76948625	76948941
chr15	77045537	77045754
chr15	77202177	77202593
chr15	77336307	77336740
chr15	77581778	77582067
chr15	77764307	77764777
chr15	77800397	77800896
chr15	77820170	77820603
chr15	77910986	77911593
chr15	77928761	77929051
chr15	78406062	78406620
chr15	78447227	78447446
chr15	78647862	78648131
chr15	78926034	78926498
chr15	78962915	78963236
chr15	78978977	78979188
chr15	79323591	79323813
chr15	79327848	79328051
chr15	79351524	79351778
chr15	79670753	79671049
chr15	79687947	79688163
chr15	79690486	79690720
chr15	79834450	79834707
chr15	79883548	79883820
chr15	80072301	80072604
chr15	80225305	80225683
chr15	80264264	80264480
chr15	80671448	80671673
chr15	80706976	80707398
chr15	80710719	80711011
chr15	80798355	80798900
chr15	80948215	80948547
chr15	81399799	81400101
chr15	81466318	81466534
chr15	81774626	81774849
chr15	81810411	81810708
chr15	81831425	81831747
chr15	81856090	81856333
chr15	82378495	82378848
chr15	82977760	82978077
chr15	83100307	83100527
chr15	83149260	83149568
chr15	83172407	83172653
chr15	83432631	83433134
chr15	83435493	83435725
chr15	83464812	83465054
chr15	84133562	84133926
chr15	84624874	84625147
chr15	84639602	84640036
chr15	84672805	84673105
chr15	85336390	85336615
chr15	85701334	85701610
chr15	86054213	86054509
chr15	86059136	86059584
chr15	86188940	86189398
chr15	88837293	88837501
chr15	88867713	88868229
chr15	89480633	89480953
chr15	89497748	89497956
chr15	91172053	91172424
chr15	91282975	91283234
chr15	93713726	93713938
chr15	93734086	93734306
chr15	95828250	95828550
chr15	96459859	96460104
chr15	96718484	96718687
chr15	97728705	97729094
chr15	97782837	97783132
chr15	97853924	97854157
chr15	98506220	98506651
chr15	98512860	98513130
chr15	98607715	98607943
chr15	98831473	98831762
chr15	98872068	98872445
chr15	98880968	98881283
chr15	98977685	98977941
chr15	99241763	99242028
chr15	99252330	99252652
chr15	99497935	99498243
chr15	99819779	99820171
chr15	100551582	100551901
chr15	101028600	101028803
chr15	101105237	101106043
chr15	101173531	101173786
chr15	101246045	101246691
chr15	101984135	101984485
chr15	102065678	102065948
chr15	102099818	102100047
chr15	102104206	102104559
chr15	102119704	102120014
chr15	102204186	102204542
chr15	102246817	102247143
chr15	102279202	102279475
chr15	102399570	102399888
chr15	102459029	102459373
chr15	102470810	102471027
chr15	102670874	102671204
chr15	103239481	103239693
chr15	103627212	103627424
chr16	4077737	4078025
chr16	4273997	4274401
chr16	4289623	4289854
chr16	4560562	4560778
chr16	4586886	4587113
chr16	4642035	4642291
chr16	4652824	4653146
chr16	4896552	4897110
chr16	4912845	4913131
chr16	5049766	5050362
chr16	5130873	5131074
chr16	8535351	8535759
chr16	8823533	8823934
chr16	8829556	8830038
chr16	8830838	8831276
chr16	10355061	10355350
chr16	10785769	10786470
chr16	10973963	10974364
chr16	11143950	11144274
chr16	11909015	11909553
chr16	13372096	13372368
chr16	13818835	13819097
chr16	14159644	14159848
chr16	15932247	15932656
chr16	15948319	15948747
chr16	15985387	15985938
chr16	16302591	16302827
chr16	16527126	16527422
chr16	16870457	16871092
chr16	17276202	17276432
chr16	17451611	17451845
chr16	17911215	17911484
chr16	18416360	18416619
chr16	18686900	18687354
chr16	18811935	18812270
chr16	20097649	20098164
chr16	21642078	21642307
chr16	22108262	22108464
chr16	22168800	22169126
chr16	22683607	22683901
chr16	23107503	23107715
chr16	23108051	23108255
chr16	23444380	23444698
chr16	23982304	23982812
chr16	24282251	24282484
chr16	24577224	24577488
chr16	24891594	24891796
chr16	25059309	25059799
chr16	27395777	27396029
chr16	29579201	29579404
chr16	29816942	29817256
chr16	29818945	29819195
chr16	29903593	29903808
chr16	29944002	29944284
chr16	30187940	30188348
chr16	30397253	30397578
chr16	30502334	30502703
chr16	30550244	30550467
chr16	30587559	30588039
chr16	30745544	30746206
chr16	30821275	30821647
chr16	30827953	30828239
chr16	31081516	31081766
chr16	31234140	31234343
chr16	31494074	31494346
chr16	31663460	31663836
chr16	32200282	32201010
chr16	32689503	32689717
chr16	32877331	32877581
chr16	33056251	33056471
chr16	33217732	33217957
chr16	33380445	33380887
chr16	34347447	34347796
chr16	34909461	34909838
chr16	34978194	34978396
chr16	35206705	35206911
chr16	35216876	35217121
chr16	35939836	35940101
chr16	36071708	36071945
chr16	36874810	36875089
chr16	37539864	37540118
chr16	37867621	37867940
chr16	37870053	37870356
chr16	37964552	37964813
chr16	37971721	37972010
chr16	38089072	38089323
chr16	38522761	38522997
chr16	38536619	38536836
chr16	42875122	42875809
chr16	42999117	42999378
chr16	43397962	43398257
chr16	43464702	43465065
chr16	43573884	43574141
chr16	43889651	43889993
chr16	44716887	44717155
chr16	45009711	45009988
chr16	45093128	45093459
chr16	45495455	45495707
chr16	49855271	49855473
chr16	50168464	50168697
chr16	52031159	52031461
chr16	52078757	52079059
chr16	55571142	55571445
chr16	55934751	55935014
chr16	55966335	55966606
chr16	56528210	56528481
chr16	56598538	56598868
chr16	57121483	57121714
chr16	57231203	57231543
chr16	57391348	57391605
chr16	59594523	59595045
chr16	64874014	64874361
chr16	68533489	68533761
chr16	70329438	70329727
chr16	76341696	76341935
chr16	76507297	76507972
chr16	76782682	76782906
chr16	84735177	84735466
chr16	84834533	84835274
chr16	85000360	85000808
chr16	85133501	85133751
chr16	85147473	85147699
chr16	86223051	86223253
chr16	87354188	87354483
chr16	87552975	87553427
chr16	90829975	90830184
chr16	90925529	90925773
chr16	91484789	91485041
chr16	91647036	91647368
chr16	91728871	91729166
chr16	91767242	91767518
chr16	91861958	91862309
chr16	92174681	92174887
chr16	92191386	92191630
chr16	92301062	92301321
chr16	94307684	94307968
chr16	94312764	94313205
chr16	94526734	94527026
chr16	94536783	94537242
chr16	95701790	95702257
chr16	95833417	95833646
chr16	96144923	96145313
chr17	3415552	3415840
chr17	4173964	4174388
chr17	5001630	5002024
chr17	5262322	5262639
chr17	7284582	7284873
chr17	8995363	8995714
chr17	9751401	9751641
chr17	10093993	10094653
chr17	10316805	10317315
chr17	11352853	11353143
chr17	12571326	12571668
chr17	12759704	12759937
chr17	12792367	12792644
chr17	13705448	13705740
chr17	14779153	14779614
chr17	15564260	15564486
chr17	16051730	16051931
chr17	16951081	16951448
chr17	17004607	17005000
chr17	17234365	17234572
chr17	17293971	17294275
chr17	17374345	17374628
chr17	17600740	17601046
chr17	17624457	17625665
chr17	17838071	17838373
chr17	20945417	20945646
chr17	23673487	23673844
chr17	23774233	23774469
chr17	24007446	24007731
chr17	24096383	24096667
chr17	24220867	24221306
chr17	24455020	24455462
chr17	24478897	24479274
chr17	24886432	24887088
chr17	24936822	24937075
chr17	25064422	25064736
chr17	25115775	25116246
chr17	25133342	25133616
chr17	25184226	25184463
chr17	25273661	25274284
chr17	25823385	25823693
chr17	25833127	25833427
chr17	25861464	25861739
chr17	25867768	25868020
chr17	25875190	25875421
chr17	25919988	25920298
chr17	26244350	26244687
chr17	26504405	26504624
chr17	26508806	26509019
chr17	26530943	26531175
chr17	26582417	26582653
chr17	26584411	26584785
chr17	26602454	26602702
chr17	26916718	26917094
chr17	27133649	27134052
chr17	27160929	27161258
chr17	27556608	27556857
chr17	27820722	27821136
chr17	27839564	27840100
chr17	28279258	28279568
chr17	28313316	28313530
chr17	28415347	28415635
chr17	28420205	28420433
chr17	28486470	28486688
chr17	28512202	28513021
chr17	28513718	28514353
chr17	28517823	28518089
chr17	28698212	28698461
chr17	28930525	28931020
chr17	29045031	29045246
chr17	29094353	29094901
chr17	29246814	29247047
chr17	29268690	29268952
chr17	29269212	29269533
chr17	29339270	29339537
chr17	29491984	29492400
chr17	29541528	29541882
chr17	29614610	29614945
chr17	30027637	30028068
chr17	31038454	31038696
chr17	31060375	31060656
chr17	31305712	31305928
chr17	31520105	31520398
chr17	31939325	31939605
chr17	32320871	32321075
chr17	32349059	32349468
chr17	32635124	32635429
chr17	33394844	33395145
chr17	33718180	33718537
chr17	33760096	33760527
chr17	33779228	33779748
chr17	33781074	33781395
chr17	33829049	33829334
chr17	33890796	33891050
chr17	33915785	33916086
chr17	33955507	33955986
chr17	33978733	33979178
chr17	34077634	34077974
chr17	34122142	34122531
chr17	34296423	34296635
chr17	34587087	34587303
chr17	34603495	34603846
chr17	34627622	34628296
chr17	34655693	34655978
chr17	34701141	34701395
chr17	34836740	34837159
chr17	34952153	34952540
chr17	35059477	35059704
chr17	35165169	35165412
chr17	35241474	35241703
chr17	35262653	35262864
chr17	35673636	35673945
chr17	35725853	35726061
chr17	35752416	35752752
chr17	35808167	35808507
chr17	35865922	35866537
chr17	35867880	35868085
chr17	35873800	35874055
chr17	35916334	35916766
chr17	35969889	35970258
chr17	36836849	36837239
chr17	36951518	36951806
chr17	39843086	39845682
chr17	39845925	39848721
chr17	43241248	43241479
chr17	43242682	43242937
chr17	43265299	43265514
chr17	43644392	43644649
chr17	44075866	44076125
chr17	44100821	44101102
chr17	45506817	45507070
chr17	46546354	46546566
chr17	46856464	46856768
chr17	47174397	47174829
chr17	47502064	47502309
chr17	49941124	49941335
chr17	50291677	50291905
chr17	52810918	52811328
chr17	53566284	53566669
chr17	53569732	53570014
chr17	53650283	53650626
chr17	55891821	55892342
chr17	56036428	56036922
chr17	56219962	56220338
chr17	56277076	56277461
chr17	56290011	56290340
chr17	56331358	56331560
chr17	56462080	56462409
chr17	56584301	56584504
chr17	56609634	56610041
chr17	56989897	56990144
chr17	56997085	56997339
chr17	57247806	57248183
chr17	57255315	57255609
chr17	57275637	57276025
chr17	57289308	57289657
chr17	64600304	64600529
chr17	64612492	64612804
chr17	64622259	64622481
chr17	65683641	65684001
chr17	65701902	65702524
chr17	65958121	65958632
chr17	67861944	67862144
chr17	67867039	67867379
chr17	69416946	69417513
chr17	70737520	70737981
chr17	70851431	70852054
chr17	71002188	71002492
chr17	71598767	71598979
chr17	71615779	71616140
chr17	72926271	72926564
chr17	73237331	73237531
chr17	73350305	73350549
chr17	73395024	73395474
chr17	73811688	73812007
chr17	73947880	73948432
chr17	73950024	73950440
chr17	73962498	73962802
chr17	73970246	73970553
chr17	74489843	74490066
chr17	74527671	74528024
chr17	75522790	75523226
chr17	78322874	78323074
chr17	78521363	78521701
chr17	78736404	78736878
chr17	78791453	78791655
chr17	79615072	79615429
chr17	79760605	79760875
chr17	79765488	79765837
chr17	79781770	79782204
chr17	79938266	79938595
chr17	80078744	80079006
chr17	80112892	80113287
chr17	80165776	80165990
chr17	81538615	81538873
chr17	83110206	83110604
chr17	83276463	83276808
chr17	83732147	83732417
chr17	83812491	83812775
chr17	83861897	83862185
chr17	83889511	83889753
chr17	83889978	83890375
chr17	83893356	83893656
chr17	83896963	83897287
chr17	83903563	83903765
chr17	83983072	83983304
chr17	84083793	84084063
chr17	84085771	84086167
chr17	84112520	84112883
chr17	84510445	84510716
chr17	84511432	84511719
chr17	84611712	84612238
chr17	84790589	84790841
chr17	84957451	84957718
chr17	85090321	85090556
chr17	86150882	86151205
chr17	86444816	86445129
chr17	86447030	86447324
chr17	86505066	86505339
chr17	86507394	86507801
chr17	86753626	86753909
chr17	87102483	87102776
chr17	87266028	87266279
chr17	87282108	87282681
chr17	87391389	87391602
chr17	88066303	88066571
chr17	88274831	88275036
chr17	88297476	88297678
chr17	88628777	88629167
chr18	4266120	4266404
chr18	4369065	4369347
chr18	4375176	4375458
chr18	4737712	4738301
chr18	5320232	5320512
chr18	5817704	5818061
chr18	5818995	5819358
chr18	6507934	6508230
chr18	6764634	6764945
chr18	7692595	7692969
chr18	10531734	10531938
chr18	11327223	11327475
chr18	11534923	11535303
chr18	11851660	11852153
chr18	11881448	11881796
chr18	11883502	11883876
chr18	12109692	12110043
chr18	12824972	12825185
chr18	12861577	12862642
chr18	14084998	14085215
chr18	14202229	14202511
chr18	20936320	20937059
chr18	23803503	23803774
chr18	23954350	23954789
chr18	24121619	24122016
chr18	24126976	24127185
chr18	24142548	24143047
chr18	24709084	24709300
chr18	25668126	25668380
chr18	31609742	31609963
chr18	32067770	32068195
chr18	32240157	32240407
chr18	32557677	32557895
chr18	33350329	33350531
chr18	33377840	33378350
[truncated: 2,474 more rows]

## Sheet: Fig6B_Venn_UP
DEGs_AdipoqCre_only	DEGs_both	DEGs_gKO_only
Sorcs2	1700010I14Rik	Mtmr10
Tox2	Klb	Ube2l3
Nr1d1	Sorl1	Copa
6430573F11Rik	Itpk1	Dcun1d2
Arhgef25	Phf17	Cd3eap
Amot	Lonrf3	9230112E08Rik
Fap	Slc9a2	Ifrd2
Tcea3	Xrcc3	Gstm2
Syngr1	Col6a1	Psma4
Pdk4	Smpdl3a	Tatdn1
Gm16310	Col5a3	Mrps22
Foxp1	Rassf3	Usp20
Npnt	Iffo2	Tmed10
Rftn2	Dtx4	Islr
Gm11942	Leo1	Capzb
Srgap3	Col6a	Akr1e1
Tspan33	Loxl4	Tbc1d24
Tmcc3	Jakmip3	Ptgr1
Klhl3	Lefty1	Nup50
Ralgps1	Arntl	Ppia
Eif4a2	Akap12	Lnx2
Zfp740	Slc7a6	Sar1b
Fam150b	Nfil3	Tmem38b
	Npas2	Apobr
	Slc19a1	Ak2
	Crlf1	1700001L05Rik
	Arhgef37	Bscl2
	Arhgap20	Faf2
	Clock	Agpat2
	Lrrc27	Parp1
	Cdkn1a	Edf1
	Baiap2	Slc36a2
	Slc27a6	Hsd17b4
	Zim1	Gm11437
	Pth1r	Scd2
	1110038B12Rik	Hist1h2bc
	Fam126b	Mettl22
	Aatk	Atp5j
	A930017M01Rik	Atg13
	Rnf125	Mettl9
	Zfyve21	Psmd11
	Hfe2	Hprt
	Mthfr	Psph
	Sez6l	Kpna1
	Gm9899	Rab1
	Slc2a5	Gtf2e2
	Myo10	Tnfaip1
	Plekhh2	Ctps
	Col1a1	Mrto4
	Dapk1	Cox11
	Trp53cor1	Lep
	Tex11	Utp20
	Phactr2	Fam45a
	Slc5a3	Nek6
	Osgin1	Abhd17b
	Ank	Ndufc1
	E2f2	Setd3
		Hdgf
		Chst12
		Immt
		Yaf2
		Tmem33
		Pqlc2
		Grk5
		B430212C06Rik
		Tmem104
		Bmp3
		Pmm1
		Def8
		Anapc10
		Kcnj2
		Emc4
		C030046E11Rik
		Slc39a8
		Immp2l
		D3Bwg0562e
		Nmt1
		Vps53
		Lypla1
		Trmt112-ps2
		Ttc39c
		Inhbb
		Letmd1
		Cdk5
		Sod2
		C1rl
		Cct2
		Rpl13a
		Tmem184c
		Gm21743
		Riok3
		Atp6v1e1
		Glrb
		Adal
		Vps41
		l7Rn6
		Hsf4
		Trmt61a
		Asap1
		Txnrd2
		Jkamp
		Pcbd2
		Arpc5l
		Grid1
		Dda1
		Metap1
		Exosc1
		Ptger3
		Akr1c14
		Apex1
		Lrrc8d
		Eef1g
		Mterfd3
		Arl8b
		Pfkl
		Idi1
		Gm20634
		Pcbd1
		Cinp
		Sec13
		Ndufs4
		Gm11766
		Selt
		Eif3c
		Bpifb6
		Nln
		Tmem63a
		Nid2
		Gpr156
		Stx8
		Mdp1
		Cystm1
		Fam203a
		Mfsd8
		Elovl3
		Tspan17
		Angptl1
		Cxcl13
		Adh4
		Slc35b1
		Nudt15
		Nr2c2ap
		Rpp14
		Pi4k2a
		Aimp1
		Phospho1
		Itga6
		Gm6484
		Dmgdh
		Ywhae
		Magi1
		Wls
		Larp7
		Gbe1
		Hist1h4d
		Gatad1
		Pdcl
		Fez2
		Fat1
		Manbal
		Ap1s1
		Cep76
		Tubb4b
		Nedd8
		Fam49b
		Rnaseh2b
		Trip4
		Calu
		Psmd2
		C1qbp
		Ubqln1
		Sephs1
		Mrrf
		Hn1l
		Mrc2
		Hmgcs1
		Gmfb
		Bcas1
		Ipo5
		Usp46
		Lrrc59
		Polh
		Ppp2ca
		Hapln4
		Ppp2r5b
		Acss2
		Prdx4
		Golim4
		Eif2s3x
		Fech
		Cyp4a10
		Med9
		Snx7
		Fam101b
		Yipf5
		Tecr
		Coa4
		Caprin1
		Eif2s1
		Ndufb3
		Cdkl2
		Srp14
		Gatsl2
		Cab39l
		Trim67
		Cct6a
		1110008P14Rik
		Sfr1
		Fas
		Uba5
		Nexn
		Ube2m
		Eef1a1
		Yif1a
		Mrps33
		mt-Nd1
		Cops4
		Elavl3
		Pm20d1
		Cables1
		Saysd1
		Pon2
		Igkv5-43
		Lphn2
		Npm1
		Slc31a1
		Bicd2
		Gclm
		Ran
		Psmc4
		Vapb
		Ttc37
		Plxna1
		Gm6166
		Rbm19
		Naa20
		Il1a
		Ttc7b
		Fam173b
		2010107E04Rik
		Sdk1
		Crtac1
		Uqcrb
		Hr
		Fxyd3
		Cmc2
		Sardh
		Dpy19l1
		Atrn
		Rangrf
		Col12a1
		Gtse1
		Atic
		Zhx1
		Yipf1
		Bfar
		Tbl3
		Polr1e
		Tbl2
		Ykt6
		Gpatch11
		Isca2
		Ap4s1
		Tfb2m
		Vcp
		Eif4g2
		Lctl
		Fam222a
		Ttyh2
		Tmco1
		Commd8
		Unc50
		St7
		Dhx32
		Anxa7
		Ufm1
		Cyp2u1
		Purb
		Mtpap
		Parp3
		Gm7665
		Gars
		Stam2
		Npr3
		Gm12265
		Gm13910
		Fasn
		Gprin3
		Cmas
		As3mt
		Psmc6
		Ttf2
		Top1mt
		Mrps17
		Gpd1
		Brk1
		Ppp4r1
		Sh2d4a
		Nus1
		Gm11940
		Banf1
		Tmem180
		Adh6-ps1
		Mpv17l2
		Smdt1
		Mrps6
		Ogfod1
		Pvrl1
		Qrsl1
		Polr3g
		Socs5
		Ndufa9
		Pgs1
		Tango6
		Als2cr12
		Mrpl44
		Ccser2
		Uchl3
		Ehbp1l1
		Crip2
		Tfb1m
		Lpcat3
		Slc25a19
		Ripk2
		B2m
		Eif3j1
		Cyc1
		Il1r2
		Ggcx
		Tanc2
		Rer1
		Nmd3
		Slc24a3
		4931406C07Rik
		Fmr1
		Lonrf2
		Akr1b8
		Otud6b
		Gas2l1
		Prkab2
		Crem
		Lrpprc
		Nudt5
		Msrb2
		Arl6ip5
		C130074G19Rik
		Gm5096
		Tnk2
		Rb1
		Cdk1
		Xrcc6
		Zfp947
		Actg1
		Fastkd2
		Pcnx
		Nsun2
		Sgcb
		Cope
		Tm9sf4
		Znhit1
		Ncl
		Hbs1l
		Tuba1b
		Crcp
		Poc1a
		Gosr2
		Srprb
		Rrp1
		Zcchc17
		Txndc15
		Anapc15
		Ghitm
		Rexo2
		Mtg1
		Dhcr7
		Pomp
		Uros
		Bmp2k
		Mtap
		Col18a1
		Pqbp1
		Eif4g3
		Cacybp
		Acn9
		Mkks
		Tomm22
		Alg8
		Pet100
		Taf13
		Heatr3
		Cks2
		D830013O20Rik
		Cdkn2b
		3110040N11Rik
		Snap47
		Vps39
		Snhg12
		Kif1c
		Uxt
		Tpp1
		Timm9
		Pmm2
		Nol10
		Stk38l
		Cox15
		Ankib1
		Uba1
		Atp6ap1
		Zcrb1
		Mest
		Pygl
		Tmem132a
		Adra1a
		Srp19
		Mpc1-ps
		Ostm1
		Atl3
		Hspb7
		Vdac2
		Nipa2
		Ece1
		Ighg2c
		Dhdds
		Smap1
		Anxa2
		Ppdpf
		Vps33a
		Map6
		Gm9696
		Srp54b
		Nkd1
		Pde4d
		Nubp1
		Aak1
		Coq2
		Dhrs7
		Chsy1
		Pomc
		Nhlrc1
		Gm4459
		Vac14
		Usp12
		Rars2
		Gmppb
		Bmi1
		Ppip5k1
		Nkiras2
		Naa60
		Ehd3
		Znrd1as
		Rrm2
		Aplp2
		Ube2d2a
		Nsdhl
		Mthfd1
		Agl
		Fibin
		Ptchd4
		Akr1b10
		Gm26588
		Ythdf1
		Psmd5
		Pank1
		2210016F16Rik
		BC003965
		Tspan31
		Med19
		Rab22a
		Rtn3
		D8Ertd738e
		Pgam5
		Tmem258
		Tnfrsf22
		Parva
		Zdhhc9
		Pdlim5
		Fbxo8
		Dnaja3
		Ube2a
		Chmp2a
		Nedd4l
		Odf3l1
		Mki67ip
		Timm8b
		Htatip2
		Pwp2
		Farsb
		Mllt4
		Csde1
		Hlf
		1700123O20Rik
		Phkb
		Bola3
		Mrpl28
		Chmp7
		Vgll3
		Tmem205
		Atf5
		Dmpk
		Rwdd2b
		N6amt2
		Ube3c
		Naca
		Prkcdbp
		Poldip2
		Mpc1
		Epdr1
		Ell2
		Pbdc1
		Tsg101
		Fbxo30
		D10Wsu102e
		Eef1e1
		Cct7
		Mrps14
		Fam20c
		Copb1
		Robo2
		D19Bwg1357e
		Sdsl
		Gm8494
		Cops5
		S100a16
		Dnajb14
		Hfe
		Aifm1
		Ccnc
		Thoc7
		Apoo
		Drg1
		Necap1
		Gfer
		Cyp4a14
		Nom1
		Golga2
		Mrpl13
		Ecsit
		Taf12
		Mmd
		Fabp5
		Luzp1
		Pfkp
		Ept1
		Clptm1
		Mpp6
		Gm10076
		Pmpca
		Maged1
		Gm13709
		Bdnf
		Wdr36
		Calm2
		Fam104a
		Bcl2l10
		Pcyt2
		Myef2
		Slc38a10
		Aven
		Agps
		RP24-176F12.8
		Nck1
		B3galt1
		Med7
		Txnl1
		Aspdh
		Mtrr
		Entpd6
		Wwtr1
		Nhp2
		Smim8
		Psmd10
		Mtdh
		Tmem234
		Map2k1
		Pet112
		Gamt
		Emilin2
		Cdc45
		Polr2m
		Sdhaf2
		Wbp1l
		Ncan
		Gm10642
		Mvk
		Atp6v1f
		Mapk8ip1
		Bace1
		Clpx
		Ncbp1
		A530072M11Rik
		Stard5
		Rnf10
		Wdr7
		C330006A16Rik
		Rnf5
		Pafah2
		mt-Rnr2
		Rtcb
		Asf1a
		Snd1
		Nacc2
		Klhl13
		Atg5
		Golga3
		Tnpo2
		Sbk1
		Cdc123
		Larp1
		Lgr4
		Tuba1a
		Slc25a10
		Duoxa1
		Gps1
		Rangap1
		Psmc3
		Rpl9
		Rabggtb
		Gid4
		Apopt1
		G6pdx
		Col8a1
		Cct3
		Mmadhc
		Cth
		Sqstm1
		Pcx
		Gm16235
		Abce1
		Slc25a39
		Isoc1
		Jak1
		Trappc1
		Brpf3
		Kcnh2
		Metap2
		Fadd
		Gm13476
		Rmnd1
		Paip2
		Gm15501
		Rad23b
		Psmb7
		Hsdl2
		Pigs
		Serp1
		Mff
		Hsp90ab1
		Cluh
		Pdss1
		Lias
		Ipo13
		Tomm20
		Lepre1
		Pdha1
		Mtor
		Bcap31
		Tcp1
		Nploc4
		Gm14325
		Noa1
		Aimp2
		Naa25
		Colgalt1
		Srxn1
		Cald1
		Tollip
		Tmf1
		Scd1
		1110018N20Rik
		Emc1
		Zmiz1
		Cox7a2
		Sec61g
		Hdlbp
		Pomgnt2
		Dph3
		Golm1
		Rars
		Cxcr4
		4930453N24Rik
		Tfg
		Pno1
		Psma3
		Cyb5d1
		Pi4k2b
		Adamtsl2
		Grlf1
		Unc79
		Vps29
		mt-Co1
		Alg5
		Eif2b3
		Vps4a
		Ppp2r1a
		Lsm3
		Mrps23
		Polr3d
		1500011K16Rik
		Clip1
		Slc15a5
		Morf4l2
		Mien1
		Pex16
		Bcl2l13
		Pdap1
		2007-09-01
		Tom1l1
		Rwdd1
		Rab27b
		Ptpla
		Mocs2
		Clns1a
		Copg1
		Kcnb1
		Ptgr2
		Bcl7b
		Blmh
		Mettl23
		Mcee
		Pdcd10
		Abcg5
		Tmed7
		2810428I15Rik
		Colq
		Trappc4
		Kif21a
		Nek7
		Sult4a1
		Sqle
		Slc35f6
		Med1
		Gm15520
		Tmem199
		Acsl3
		Rnf214
		Fam120a
		Tnfaip2
		Yars2
		BC026585
		Carkd
		Mc2r
		Lman1
		Kpna2
		BC003331
		Swsap1
		Gprin1
		Pigc
		BC026590
		G630090E17Rik
		Ttll12
		Pgbd5
		Ndufb10
		Tubgcp4
		Sumf2
		Pde7b
		Ormdl2
		S100a3
		Idh3b
		Tmem18
		Cdc37
		Rhbdl3
		Cct8
		Fastk
		Mrfap1
		Phlda3
		Cacul1
		Mrs2
		Ndufb4
		2015-09-01
		Ugt3a2
		Enpep
		Tlcd1
		Pa2g4
		Bbip1
		Ttc19
		Zfand2a
		Trp53inp2
		Pdhx
		Grtp1
		Aldh1a7
		Eif5a
		Gapdh
		Arl2bp
		Pole4
		Etv4
		Rabif
		Akr1c13
		Gpi1
		Pcgf5
		9630033F20Rik
		Orm2
		Chek1
		Rps16-ps2
		Fam136a
		Frmd3
		Traf3
		Pitx3
		Nsd1
		6330418K02Rik
		Taco1
		Cox5a
		Thoc6
		Rnmt
		Tnfrsf23
		Pemt
		Armc8
		Gm26885
		Minos1
		Carhsp1
		Lsmd1
		9630013D21Rik
		Mrp63
		Rps2
		Ppic
		4930402H24Rik
		Exosc9
		Tdrd7
		Cib2
		Hagh
		Sucla2
		Slc36a4
		Gfm2
		Pigq
		Esyt2
		Mdh1
		Mapre1
		Uqcr10
		Hax1
		Cpt2
		Tyms
		Ccnf
		Slain2
		Vps35
		Lox
		Rhoq
		Prkrir
		Nedd9
		Cmip
		Hars
		Commd3
		Snrpd3
		Bin1
		Cfl2
		Rpf2
		E2f6
		Ccdc91
		Kif2a
		Eif4g1
		Lrrc3
		Qk
		Slc22a2
		Mrps18b
		Hspb8
		Mthfsd
		Aga
		Ociad1
		Eif3b
		2610507B11Rik
		Rwdd4a
		Ppp1r3b
		Crnkl1
		Timm23
		Uhmk1
		Slfn9
		Napg
		Mfng
		Fam50a
		Wdr70
		Esrrb
		Dars
		Ubtd1
		Sec23b
		Gm15179
		Actr1a
		Paics
		Immp1l
		Avpi1
		Mid1ip1
		Map3k7
		Pcsk9
		Gm129
		Bub3
		Mycbp
		Gypc
		Larp4b
		Dap3
		Slmo1
		Cdv3
		Prdx3
		Tmem256
		Setmar
		Ccne2
		Tstd3
		Arap2
		Bend3
		Gmnn
		Slc30a9
		Ap2a1
		Bud31
		Ppp2r5c
		Pofut1
		Ctage5
		Mcfd2
		Mc5r
		Ppapdc1b
		Ppp6c
		Eef1a2
		Rbm18
		Mrpl17
		Dap
		Eif2s2
		Uba3
		Stambpl1
		Prkar2a
		Nupr1
		Mrpl16
		Aamdc
		Coa3
		Ms4a1
		Slc35c2
		Gm8894
		Nudcd2
		Adap1
		Cops3
		Acyp1
		Bnip1
		Ints4
		Eapp
		Slc45a4
		Dtwd2
		Atp10a
		Ndufaf6
		Rcc1
		Mrpl27
		Asf1b
		Rpp30
		Psmd14
		Chordc1
		Ctr9
		Tomm40l
		Pla2g6
		Hist1h2ac
		Sh3pxd2b
		Xrcc4
		Utp14a
		Ndufb7
		Nckap1
		2700060E02Rik
		B230118H07Rik
		Fam49a
		Dhrs3
		Lyplal1
		Dph2
		Tex2
		Srpr
		Cpeb1
		Tpi1
		Ptpn12
		Mpc2
		Serpinf1
		Chmp3
		Tsn
		Kpnb1
		Ahsa1
		Rnf11
		Atr
		Atp6v1h
		Cirh1a
		Gna12
		Gm10123
		Tmem41b
		Msln
		Pkm
		Pomk
		Spcs1
		Cmpk1
		Cops8
		Rnf217
		Pstk
		Cry2
		Txnl4b
		Ighm
		Atxn2
		Gm561
		Parl
		Slc39a9
		Cd55
		Nfu1
		Hspa9
		Nfatc3
		Haus3
		Mcur1
		Dennd4a
		Slc25a35
		Cspg4
		Gemin7
		Chid1
		Saa2
		Ephb2
		Prep
		2810430I11Rik
		Prmt7
		Snx13
		Psmd6
		Asb16
		Fam149a
		Ccdc107
		Rtca
		Gm17147
		Ipo4
		Creb3l1
		Nubp2
		Irak2
		AW551984
		Cdk14
		Matn2
		Dnaja2
		Sema3c
		Sc4mol
		Lsm6
		Atp6v1g1
		Ppp1ca
		Dck
		Tmem9b
		Gm9892
		Cyb5r4
		Rraga
		Commd10
		Mea1
		Erh
		Thbs2
		Rab5a
		Ttc28
		Stx18
		Bhmt
		Irgq
		Lamtor4
		F5
		Tceal8
		Tmem242
		Fam57b
		Vdac1
		Ghdc
		Snrpc
		Nolc1
		Tmem14c
		Eefsec
		Psmc5
		Mrgprg
		Coq7
		Exoc5
		Ilf2
		Gm5540
		Gm16515
		Alg2
		Ankrd13c
		Furin
		Pgam1
		Nop10
		Kti12
		Hspd1
		Chmp1a
		Alx4
		1700029I15Rik
		Cdc34
		Wbp2
		Msra
		Tmem69
		Amy1
		B230206L02Rik
		Ddx1
		Hmgn2
		Skp1a
		Atg10
		Uchl5
		Orm1
		Utp18
		Mrap
		Nudt2
		Echdc1
		Setd7
		Nfkbib
		Tanc1
		Ltv1
		Kif1b
		Prr16
		Mrpl32
		Atp5c1
		Fam69a
		Timm13
		Chchd1
		Ubac1
		Mtfp1
		Uqcrq
		Cdr2
		Sec23a
		Dera
		Higd2a
		Rps27l
		Plaa
		Dync1li1
		Pak1ip1
		Nap1l1
		Mrpl43
		Mpdz
		Zbtb41
		Ifngr2
		Abhd10
		Acnat1
		Olfr1388
		Fras1
		Zfp91
		Ctsd
		Grpel1
		Cox6b1
		Hist1h1c
		Reep1
		0610009B22Rik
		Sgsh
		Ints7
		Acat2
		Tax1bp1
		Atp1a3
		Tkt
		Uso1
		Mettl3
		Kng2
		Egln3
		Cpa2
		Mrpl12
		Tulp4
		Ephb3
		Sdf2
		Scfd1
		Atox1
		Pyroxd2
		Cpped1
		Txndc9
		Senp2
		Dnmt3l
		Rap1gap2
		Lyrm9
		Tdg
		Ndufs1
		Med8
		Akr1c20
		B4galt6
		Pnldc1
		Acaca
		Psmd13
		Coq3
		Nme4
		Cisd1
		Dctn5
		Vapa
		Eaf1
		Gm14410
		Tubg1
		Pip4k2c
		Atf6
		Kctd3
		Usp16
		Stard4
		Timm8a1
		Eprs
		Cdc42
		Smim20
		Rpe
		Dolk
		Rad17
		Nbn
		Slc25a3
		Spryd4
		Serpinh1
		Sumo1
		Rap1gds1
		Pla2g2e
		Tbce
		Ube2j1
		Tmem208
		Pigk
		2010003K11Rik
		Ndrg3
		Fhod3
		Txn2
		Rrp12
		Fam98a
		Ptk2
		Psmb2
		Triap1
		Lrpap1
		Iscu
		Ccdc47
		Tmem59
		Mrps11
		Arhgef18
		Atp5b
		Xkr8
		Dse
		Cops7a
		Gba
		Gcnt2
		Fam20b
		Them4
		Asap2
		Cd59a
		Rtn2
		Pmvk
		Ccdc125
		Rala
		Gucd1
		Pomt1
		Ndufs6
		Fam213b
		Ttc25
		Ptges2
		Myl6
		Cryab
		Copb2
		Tpd52l2
		Pabpc4
		Ptrh2
		Commd7
		Capn2
		Gm14328
		Ide
		Psme3
		2410015M20Rik
		Rpl4
		Nudt7
		Lmtk2
		Map2k6
		Elovl6
		Fkbp1a
		Srm
		Ube2n
		Nsfl1c
		Mapkapk3
		Mlec
		Knop1
		Tmem62
		Thop1
		Spats2
		Ppcs
		Sec31a
		Ctnnb1
		Gm12426
		Pfdn1
		Aldh1l1
		Dfna5
		Lgals1
		Pitpnm2
		Tsc22d2
		Sfxn5
		Col15a1
		Gm11773
		Ces2e
		Ago2
		Eif4e
		Adk
		Acta1
		Gpr125
		Vps37a
		Rsad1
		Raf1
		Esm1
		Svil
		Tmem120b
		Fam63b
		1110057K04Rik
		Mtpn
		Abcg1
		Sptan1
		Lyrm7
		Lactb2
		Krt10
		Rbp4
		Akap17b
		Cnnm2
		Zdhhc3
		Pabpc1
		Igbp1
		Pkp2
		Uhrf1bp1
		Hspa12a
		Ssr1
		Dlat
		Micu1
		Tmco3
		Bccip
		Mmp28
		Pwwp2b
		Strap
		Inpp5a
		Dgki
		2410127L17Rik
		Kctd9
		Lsm14b
		Arcn1
		Egln1
		Psma2
		Zfp462
		Dnlz
		Mettl21d
		Mrpl18
		Tesk1
		Sh3kbp1
		Hrsp12
		Tmem248
		Bet1
		Mmab
		Atp2a3
		Dld
		Nit1
		Nutf2
		Ggct
		Pop5
		Myl12a
		Cyb5r1
		Hdac9
		Nudcd1
		Gm3571
		Lrrc57
		Snrpe
		Actl6b
		Bop1
		Fam124b
		Atp6v0a1
		Pctp
		Caap1
		Cox10
		Dph6
		Pfdn2
		Ccdc85c
		Rabl6
		2310061I04Rik
		Kif21b
		Poln
		Gm26626
		Ppil3
		Eme2
		Tmed2
		Arf1
		Sco1
		Calm1
		Ddx21
		Srp72
		Abhd1
		Atp6v1d
		Haus2
		A830052D11Rik
		Eif4e2
		Dnajb12
		Nkiras1
		Nme1
		Trub2
		Wdr75
		Stradb
		Ufd1l
		Tmem183a
		3110002H16Rik
		Nlk
		Pdhb
		Gm18336
		Rtn4ip1
		Atpaf2
		E2f3
		Acadvl
		Acbd4
		Uqcc1
		Col4a2
		Arl1
		Polr1d
		Mtfr1l
		Cfl1
		Mrps2
		C430014B12Rik
		Tor1aip2
		Pes1
		Nid1
		Uqcrfs1
		Podnl1
		Ccnd2
		Psmc2
		Ankrd40
		Tbc1d7
		Degs1
		Gabarapl2
		Mrpl35
		Commd2
		Hal
		Katna1
		Mdh2
		Rad23a
		Dtl
		Dhx29
		Parp6
		Pnpla5
		Rtn4
		Fhl1
		Gm10762
		Alg9
		Stra13
		Capza2
		Sec24d
		Epb4.1l2
		Nupl2
		Blvra
		Cnih1
		Gdf6
		Sacm1l
		Gfm1
		Gale
		Hspg2
		Thbs4
		Prdx2
		Nat10
		Cops6
		Ube2k
		Slc16a12
		B3galtl
		Pmpcb
		Rnpep
		Fam192a
		Mbd3
		Cgrrf1
		Gm13340
		Atp1b3
		Pin4
		Tenm4
		Ddx39
		Rad9a
		Sdhd
		Gm12796
		Cela1
		Mrpl41
		Nt5m
		1600002K03Rik
		Hmgn5
		Hist1h2be
		Ubxn8
		Clasp1
		Opa3
		Rbbp8
		Cyp51
		Hmcn2
		Cdk20
		Narf
		Lacc1
		Lamtor1
		2002-03-01
		Mageb18
		Nol3
		Rpsa
		Mrpl42
		Cox19
		Sycp3
		2310044G17Rik
		Tlcd2
		Emc6
		Lhfpl2
		Dnajc5
		Cap1
		Fer1l6
		Plin2
		Ptcd3
		Nol12
		Phf5a
		Plcb1
		Hmbs
		Litaf
		1700007L15Rik
		Tnfrsf11b
		Ppp3r1
		Desi1
		Mrps28
		Igsf8
		Ldlr
		Arf4
		Lrrc24
		Pcyox1
		Snapc5
		Cars2
		Nabp2
		Zfyve9
		Tsfm
		Tmem135
		C1d
		Tbrg1
		Mrps7
		Vim
		Rabep1
		Gm12286
		Prorsd1
		Rpl7l1
		Tmem177
		Wdr61
		Irak1
		Utp14b
		Cldn5
		Nras
		Tpmt
		Elp5
		Dis3l
		Deptor
		Ict1
		Usp32
		Pecr
		Snapc1
		Ube2b
		Emc2
		Hist2h2aa1
		Pde7a
		Dusp10
		Orc4
		Brd7
		Aspg
		Psmb1
		Skiv2l2
		Rpusd3
		Fgf1
		Otud3
		Rhot1
		Dbp
		Nsf
		Kpna6
		Ebp
		Psmb5
		Npc2
		Pam16
		Lonp2
		Wdr77
		Usp39
		Apln
		Twf2
		Idh3a
		Mob1b
		Sfrp2
		Laptm4b
		Fam57a
		Nup35
		Traf2
		4833439L19Rik
		Taldo1
		Maoa
		Nos1ap
		Hspa4
		Sec61b
		Gm4912
		Cct4
		Wdr59
		Acoxl
		Nog
		Lsm2
		Rnf144a
		Dio2
		Timmdc1
		Gm24074
		Extl3
		Eif3a
		Cs
		Psmd7
		Trappc2
		Tmem14a
		Smim7
		Actb
		Igfals
		Pam
		Eno1
		Otop1
		Aldoa
		Cox7a1
		Ccng1
		Fam114a1
		Ifi27
		Tmem161a
		Gm5627
		Gskip
		Mpzl3
		Snupn
		Mtch1
		Tspan9
		Fam217b
		Gcsh
		Rsu1
		Heatr5b
		Tom1
		Actr10
		Insig1
		Ostf1
		1110058L19Rik
		Wdr1
		Exog
		Coq10b
		Gtf3c3
		Gm13456
		Ints2
		Itih5
		Ndufaf4
		Dpcd
		Tmem167b
		Timm22
		Pomt2
		Agpat5
		Dcaf6
		Scrn2
		Gpr155
		Mgmt
		Snrnp25
		D17Wsu92e
		Fgfr1op2
		Rcbtb2
		Ntn4
		Hccs
		Memo1
		Ddx54
		Large
		Trappc13
		Ciao1
		Rassf8
		Alcam
		Ubxn1
		Kank2
		Hsd17b7
		Usp15
		Rasl12
		Mttp
		Spag7
		Qpctl
		Mrps10
		Tmem147
		1810055G02Rik
		Ubl7
		Eif2b1
		Csnk2a1
		Sec22b
		Mgrn1
		Psmd1
		Mettl1
		Slc2a2
		Tmem70
		Wipi1
		Gm11520
		Mrpl55
		Hip1
		Mlf1ip
		Tssc1
		Nono
		Thg1l
		Stip1
		Oxtr
		Elmo2
		App
		Mast2
		Ndufa11
		Zwint
		Hvcn1
		Tmem79
		Ldha
		Tceb3
		Ccdc25
		Atp6v1a
		2210015D19Rik
		C1galt1c1
		Dnajc2
		Psmd12
		Ppm1f
		St3gal3
		Pex7
		Ctsl
		Ntsr2
		Rpap2
		Tmem126a
		Eif4a1
		Napa
		Stt3b
		Ipo11
		Ptges
		Dynlrb1
		Setd8
		Prkaa2
		2310045N01Rik
		Apoc4
		Insc
		Ipp
		Minpp1
		Rpl32
		Plxnd1
		Adpgk
		Atp6v0e
		Pdcd5
		Ccdc124
		Rpl22l1
		Cct5
		Rnmtl1
		Fabp7
		Tmem230
		Thoc5
		Lyrm5
		Nprl3
		Osbpl5
		Tmem41a
		Fah
		Ndufb5
		Rnf7
		1700021F05Rik
		Hephl1
		Mvd
		Hsd17b12
		D5Ertd579e
		Gm8730
		Nif3l1
		Dad1
		Fam188a
		4921531C22Rik
		Cltb
		Commd6
		Dnajc24
		Slc25a46
		BC056474
		Gnptab
		Fam122a
		Klhl5
		Tbcd
		Slc46a1
		Vwa8
		Smad2
		Eif5
		Aptx
		Cox20
		Hif1a
		Arl16
		Cog6
		Rdh14
		1110001A16Rik
		Prdx6
		Me1
		Morc4
		P2ry2
		Awat2
		Mrps18a
		Mrpl50
		Rhod
		Cyp2c38
		Srrm4
		Atp6v0d1
		Polr3k
		Xpnpep1
		Tyw5
		Uqcc2
		Slc39a11
		Col5a1
		Dmrt2
		Snf8
		Pla2g15
		Myh7b
		Jmjd8
		Mia3
		Hilpda
		Hist1h1d
		Syncrip
		Exoc4
		Psme4
		Swi5
		Hdhd2
		Abcf2
		Sirt5
		M6pr
		Lrrc39
		Ndufs5
		Plch2
		Dynll2
		Nol7
		Sigmar1
		Optn
		Prkaca
		Ccdc167
		Adcy10
		Gm10110
		Mb21d2
		Nudt3
		Mapkapk2
		Xlr3c
		Mrpl23
		Olfm1
		Azin1
		Mbtps2
		P4hb
		6330416G13Rik
		Zfp664
		Bhlhe41
		Asna1
		Dusp3
		Gpc4
		Ltc4s
		Wdr12
		2610028E06Rik
		Gtf2e1
		Mettl24
		Cnbp
		Itsn1
		Fgf13
		Ube2f
		Ubap1
		Ei24
		Chpt1
		Kpna3
		Elac2
		Fbxo28
		Mbp
		Nfic
		Galnt1
		Ufsp2
		Eny2
		Eif1a
		Fgfr1op
		Elovl4
		Lurap1l
		Prr13
		Casp3
		Golga7b
		Atp6v0b
		Rrn3
		Dbi
		1700037H04Rik
		Amer1
		Lgals3
		Cycs
		Nap1l4
		Cyb5b
		Spry4
		Btbd10
		Atp5f1
		Hspe1
		Ptprq
		Actr3
		Lrrfip1
		Bmyc
		Ciapin1
		Ptpmt1
		Cd99l2
		Ighv3-8
		Vti1b
		Capn7
		Dbf4
		Higd1a
		Kcnk3
		Gorasp2
		Ndufv3
		Psma6
		Copz1
		Mmp15
		Ptpn2
		Ppp1r7
		Acp1
		Kcmf1
		Hist1h2bj
		Sparc
		Lipo1
		Gckr
		Seh1l
		Mtch2
		Pter
		Ipo7
		Ptk2b
		Sftpa1
		Gdpd5
		Slc22a4
		1810022K09Rik
		Decr1
		Nars
		Twistnb
		AI597468
		Pdxk
		Fam149b
		Bcl2l2
		Cenpq
		Mmachc
		Atp5l
		Mina
		Mrps21
		Ddo
		Iars
		Col4a1
		Dnm1l
		Gm26982
		Slc25a17
		Tubb2a
		Tmem209
		Ikbkg
		Mcts2
		Mapkap1
		Med21
		Rnf13
		Acly
		Wnt2
		Ubl4
		Parp9
		Gltp
		Ankrd28
		Prkce
		Mapk6
		Map2k4
		Gtf2h5
		Cox7c
		Lpgat1
		D17Wsu104e
		Ttc33
		Krcc1
		Map4k4
		Cwc15
		Rsl1d1
		Ube2c
		Tomm70a
		Taf4b
		Apmap
		Hadhb
		Acbd3
		Ranbp9
		Creld1
		Pafah1b2
		Lect2
		B4galt7
		Tefm
		Uvrag
		Akr1b3
		Etfdh
		Nop16
		Stom
		Ints10
		Ap3s2
		Foxk2
		Cln5
		Klhdc10
		mt-Nd2
		Rpl6
		Capza1
		Bpnt1
		Thyn1
		Angpt2
		Pdzd11
		Deb1
		Apoc2
		Mrpl10
		Cisd3
		Ksr1
		Tspan6
		Exoc1
		Tmem167
		9330159M07Rik
		Mprip
		Rnf14
		Prss35
		Tmem80
		Smtnl2
		Slc18b1
		S100a11
		Naa50
		Gm12236
		Ovca2
		Ppih
		Zfp106
		Pcmt1
		Kif5b
		Etf1
		Fxr1
		Bcar3
		Gm10516
		Dhdh
		Atp6v1c1
		Sdhc
		Vps36
		Mrpl49
		Tmx2
		Prdx1
		Mlx
		Prss27
		Lamtor5
		Set
		Hsph1
		Dhrs1
		Zdhhc2
		Gyg
		Bzw1
		Mmp3
		mt-Cytb
		Acsf2
		Noc3l
		Abcd3
		Hist1h4c
		Anxa1
		Itfg1
		Gm6277
		Mrpl15
		Hras
		Itgb1
		Tulp3
		Lss
		Tsr1
[truncated: 521 more rows]

## Sheet: Fig6B_Venn_DOWN
DEGs_AdipoqCre_only	DEGs_both	DEGs_gKO_only
Pdp2	Spata2	Trim21
Lrch4	Nsg1	Itm2a
Gadd45b	Fads1	Adap2
Lrtm1	Rab9b	Tacc1
Cdc42se1	Gbp11	Suv420h2
Amn1	Casp12	8430419K02Rik
Pfkfb4	Cyp2e1	Srrm1
Trpv1	Thbd	Scn5a
Pmp22	C920006O11Rik	Fam120b
Igfbp4	Fhl3	Nudt6
Aldh3b2	Zfp395	Plekhg2
Igkv8-24	Asph	4833418N02Rik
Igf1	Bahd1	Siglech
Serpina3f	Ung	BC037034
Apex2	Fam102b	Dleu2
Stat1	Pon3	Cbx7
Trp63	Uap1	Gm20033
Ighv6-3	Ifi27l2a	Mmp2
Nabp1	Smyd1	Ptplb
Pvr	Cbr3	Nfatc4
Flrt3	Phka2	Rprml
Sypl	Znrf2	Wdr33
Kcnj15	Hpgd	Gm17705
Fam83a	Slc4a4	Cryaa
	Zfp503	Nova1
	Disp2	Sin3a
	Serpina3b	Ldb1
	Nampt	Lmbr1l
	Rnf19b	Pacs1
	Ccdc80	Hmgn3
	Rnd3	Gm16266
	Dixdc1	Car3
	Fam160a2	Gm15912
	Hsd11b2	Ttll2
		St5
		Twist2
		Psd4
		Fam117a
		Acin1
		Zmat1
		Rnf152
		Med12
		Adrb1
		Kdsr
		Usp11
		Tmem158
		Aldh7a1
		4933406I18Rik
		Tyrobp
		Wdr45
		Irf5
		Trim56
		Abhd14b
		Epb4.1
		Fignl2
		Ccl19-ps1
		Myo1b
		Cmtm3
		Iffo1
		Tmem53
		6720401G13Rik
		Spon1
		Inpp4a
		Trim26
		Tmeff1
		Mycl
		Kansl3
		Lrp1
		Lgals12
		Med28
		Jund
		Maf
		Stard8
		Cyp2f2
		Dcn
		Camp
		Stx16
		Rtkn
		Slc38a7
		Rdm1
		Ppp1r12b
		Axl
		Scn7a
		Mamdc2
		Gpr81
		Tmem88b
		Egfr
		Cma1
		Plekhf1
		Accsl
		Txndc5
		Klhl2
		Gm12258
		Camk1d
		Zfp606
		Klhl21
		Snrk
		Ier2
		Tmem170b
		Jam2
		Gm12758
		Tcea2
		Chdh
		Tlr13
		2010001M06Rik
		Ttc17
		Serpina3i
		Dock11
		Add3
		Meis1
		Pde3b
		Gabre
		Gfra3
		Gm17491
		Hpca
		Gm13111
		Rspo3
		Mrgbp
		Maz
		Clec9a
		Cnppd1
		Ccl12
		Eepd1
		Otud5
		Atp2b1
		Tap2
		Neil2
		Recql5
		Rad51d
		Zbtb20
		Ppap2b
		Vamp2
		Grem2
		Il10rb
		Mst1r
		Cirbp
		Ccdc71
		Gm17251
		Id4
		Tcf7l1
		Gm13861
		1700113A16Rik
		Pirb
		Slc9a3r2
		Rbbp6
		Vill
		Rhou
		Plp1
		Ldhb
		Rarg
		Nmb
		Rffl
		Trim12a
		Prtn3
		Wtip
		Nmi
		Tst
		Agpat9
		Gm4980
		Il6st
		Olfml2b
		Fnbp4
		Slc25a29
		Slc12a7
		Fndc5
		Shcbp1l
		Rnasel
		Obsl1
		Vmp1
		Zfp2
		Ccl24
		Scn4b
		Prss34
		6330419J24Rik
		Cacng4
		Tmem260
		Strip2
		Olfr1033
		Ntn1
		Mapk8ip3
		Zrsr1
		Zfp703
		Letm2
		Nynrin
		Dusp16
		Mettl20
		Map1b
		Akap8
		Mfsd7c
		4933439C10Rik
		C5ar2
		Zbtb39
		Ube2e3
		Rbm33
		Mnt
		Plekhn1
		Kcna2
		4932441J04Rik
		9530082P21Rik
		4930524O07Rik
		Lta4h
		Mcmbp
		Triobp
		Rchy1
		Wrnip1
		Clip3
		Mir5125
		Kcnc3
		Pde1b
		Serpinb8
		Rbm5
		Bnc2
		Gm17057
		Aif1
		Siglece
		Ptafr
		Oplah
		Rhobtb1
		Rassf6
		Nnt
		Cryl1
		N4bp2l1
		Gm21781
		Accs
		Gm10605
		Cpxm1
		Alms1
		Zfp646
		Gpsm1
		Gm16675
		Cd63
		Ccdc3
		Hipk3
		Rock2
		A230050P20Rik
		Gm16230
		Gpr20
		Fbxl22
		4933406C10Rik
		Bmp2
		Vezt
		0610009E02Rik
		Bin3
		Thumpd2
		Mir17hg
		Ivd
		Zmym3
		Gm14454
		Lmo2
		Swap70
		Dnase2a
		Plcl1
		2009-03-01
		Cant1
		Mdm4
		Adra1b
		Adam2
		Dxo
		Cyb561a3
		Pcgf2
		5031425E22Rik
		Prodh
		Hpgds
		C1qtnf1
		Tcf21
		Gm454
		Bach1
		Tbc1d17
		Pced1a
		Pf4
		Prss53
		Ncf2
		Angpt1
		Pck2
		Slc4a3
		2810459M11Rik
		AF251705
		Adamts12
		Irak1bp1
		B4galnt1
		Tfap4
		Rbbp4
		Prr5l
		Dpm1
		Tshz2
		Rasd1
		Mboat7
		Klf2
		Ctdsp1
		Dennd2d
		Slc2a4rg-ps
		0610030E20Rik
		Tnks1bp1
		Plekha4
		Foxj2
		Asl
		Man2a1
		Xylt2
		Sned1
		Dtnb
		Sec24b
		Fmo5
		Arrb2
		Myom1
		Slco2b1
		Gm16008
		Ddah2
		Plau
		Fos
		Ccnj
		Mark2
		Whamm
		Cd209f
		4933427D14Rik
		Thpo
		Fyb
		Porcn
		Sh3d21
		Ms4a7
		D730003I15Rik
		2210018M11Rik
		Eif4b
		Aco1
		Pnn
		Kcne4
		Zfp369
		Lrfn4
		Abhd3
		Scaf4
		Rasgrp4
		2900005J15Rik
		Tuba8
		Sdf4
		Zfp36l2
		Nrbp2
		Fut11
		Cabin1
		Lyl1
		Gas1
		Snx33
		Tapt1
		Smg6
		Slc22a23
		Fance
		Plagl2
		Paqr3
		Ecm1
		Lmod1
		Erap1
		2810008D09Rik
		Nr1h2
		St8sia3
		C3ar1
		Poc1b
		Ephx2
		Fam46a
		Pola2
		Trpv4
		Slc25a23
		Ptpn14
		Mucl1
		Irf3
		1700001O22Rik
		Mertk
		Sema4d
		Prrt1
		Fancc
		Adam15
		Avpr1a
		Gm13594
		Flcn
		Rbm43
		Sft2d3
		Cdc40
		Csf1
		Ces1d
		Oard1
		Zfp28
		Nab2
		Atp8b4
		Zfp866
		Zfp865
		Fam210b
		1500026H17Rik
		Zbtb43
		Gm16253
		Fgf2
		Stard13
		Gm15535
		Smarcc2
		AI838599
		Ext1
		Slc9a9
		Cenpv
		Cluap1
		Klrk1
		Acsm3
		Timp4
		Trim41
		Prpf40b
		Hopx
		Gm14286
		Cd97
		Nptxr
		Mgst3
		Gm9458
		2610020H08Rik
		Acadsb
		Dok2
		Gm23134
		Xbp1
		Gm10037
		Npepps
		Pros1
		Itgb4
		Pln
		Parp10
		Dennd1a
		Camk2n1
		Dok7
		Rasa4
		Birc2
		Fam174b
		Asap3
		BC051226
		Tcp10b
		Sox10
		Zfp592
		Unk
		Map3k7cl
		Zfp821
		Sgk3
		Cers6
		Nfia
		Zfp94
		Kat6a
		Rwdd3
		Sh3bp2
		2810410L24Rik
		Echdc2
		Gm11816
		BC035947
		Zbtb42
		Pcnt
		Klrb1c
		Gm12216
		4930599N23Rik
		Sorbs2
		Kctd6
		Laptm5
		Chst15
		Cyr61
		Rapgef2
		Myo1f
		Kansl1l
		Zdhhc18
		Ddr2
		Neu1
		Mitf
		Hes7
		Bhlhb9
		Gm16124
		Irf1
		2810032G03Rik
		Clec4n
		Cplx1
		N28178
		Adamts14
		Fam76a
		Ccnl2
		Dlg4
		Aff1
		Plcd1
		Spats2l
		4933429H19Rik
		Stx1b
		1700048O20Rik
		Cyp1a1
		Ppp4r1l-ps
		1600020E01Rik
		Slc2a9
		Cdkn1c
		Spry2
		Galnt10
		Celsr2
		Tinagl1
		Grcc10
		A4galt
		2008-09-01
		Fmo4
		Ppp1r9b
		Kdm5d
		Hrk
		Foxo4
		Igkv8-21
		Gm16348
		Slc8a2
		Sirpa
		Lrch1
		Hexdc
		Zscan25
		Ndst2
		1110020A21Rik
		Nr3c2
		Abca6
		Cd300ld
		Gpr152
		Atp6v1g2
		Yeats2
		Clcn2
		Tmco6
		Synpo2
		Srrm2
		Spp1
		Arhgap9
		Smim5
		Nfatc2
		Coro1b
		Unc93b1
		Cyth4
		Sbf2
		Frmd6
		Kmt2e
		Gpr137c
		Hmha1
		Fbxo45
		Zfp598
		Slc43a1
		Gnb4
		Dgkb
		Drd1a
		Zfp513
		Rcn1
		Pbx2
		Msantd2
		4833420G17Rik
		Patz1
		Cdh2
		Igkv10-94
		Rfx1
		Agbl3
		2810055G20Rik
		Aldh1a3
		Aldh6a1
		C730034F03Rik
		Samhd1
		Fcgrt
		R3hcc1l
		Aox3
		Src
		Acot4
		Six5
		Pold3
		Rbak
		Phkg1
		1810024B03Rik
		Tmem191c
		Per3
		Nr1d1
		Ddx26b
		Vamp1
		Galk1
		Raver2
		Tnip2
		Endod1
		Pex11g
		Chd2
		Noxo1
		Mum1
		Vit
		Pigl
		Dido1
		Lilra5
		H2-M3
		Col6a6
		2510046G10Rik
		Lrrc4
		Gsn
		Evi5l
		Nxpe5
		Gng7
		Txn1
		Rapgef3
		Itga8
		Dct
		S100pbp
		Zkscan3
		Morc2a
		Shpk
		Fam129a
		Dennd4b
		Elmod3
		Fcamr
		Trmt1l
		Mogat1
		Fam178a
		Prf1
		Dcp1b
		Trim11
		Lama1
		Baiap3
		Lgi4
		AA465934
		Sox5
		Cep95
		Gm14872
		Psmb8
		Mpg
		Dennd1c
		Gm26684
		Mxd1
		Gstt3
		4931406P16Rik
		Drap1
		3830408C21Rik
		1110054M08Rik
		Gm8619
		Irs2
		Ssh2
		Ctdsp2
		Irs1
		Mcpt4
		5730446D14Rik
		Snx30
		Vnn3
		Gm26924
		Ppef2
		Sctr
		Plcl2
		Fcer1g
		Cabp4
		Ccar2
		Zfp963
		Luc7l
		Adamtsl4
		Pdk2
		0610043K17Rik
		Hoxc4
		Zc3h4
		Map4k2
		Cldn26
		Parp12
		Gm8097
		Fam193b
		Chst1
		Cnn1
		Fzd1
		Sprn
		Inca1
		Arhgef10l
		Msl1
		Ogfod3
		Tcn2
		Gatm
		Gm17597
		Osbp2
		Fgd2
		Cadps
		Gas6
		2610035D17Rik
		Dcaf8
		Anxa9
		Zfp580
		Pcdhga9
		Lao1
		Ctsc
		Slc6a2
		Gm10602
		C7
		Mtmr14
		Frs3
		Dpy19l3
		Thra
		Cers4
		Zbtb7a
		Tfdp2
		Ppp1r14a
		Car1
		Gpnmb
		Epc2
		Zfp764
		Zfp426
		Abi3bp
		Gm13091
		Usp21
		Kcna6
		Fut8
		Aox1
		Des
		Rassf1
		Grasp
		Adck5
		Acrbp
		Asb13
		Mospd3
		Serpina3j
		Epsti1
		Podn
		Aasdh
		AW011738
		Fam134a
		Gpat2
		Arx
		Clec12a
		Pigz
		Id2
		Btc
		Cox17
		Slc35f5
		St3gal1
		Rab15
		4930556M19Rik
		Ephb4
		Grb14
		Phlpp2
		Lcp1
		Srpx
		B4galt3
		1700019G17Rik
		Adrb2
		Il18bp
		Klhdc8b
		1700030K09Rik
		Lima1
		Slc27a1
		B230322F03Rik
		Col23a1
		Tpsab1
		Cntfr
		Tbx1
		Lypd1
		Endou
		Rev1
		H3f3b
		Tbkbp1
		Aph1c
		Ppp6r2
		Plekho1
		Mepce
		Fmnl2
		Dcst1
		Zfp954
		Vwf
		Slc43a3
		Tagln
		Sp1
		Tm7sf3
		Ttc38
		Zfp516
		Lrch3
		Naprt1
		Agbl5
		Trim47
		Fndc3a
		Clk3
		Cpsf7
		Taf8
		Ifi205
		Gm11837
		Ccdc84
		Parp4
		Phf7
		Trem2
		Arhgef25
		AA415398
		Appl2
		2310067B10Rik
		A330023F24Rik
		Cxcl9
		Zfp747
		Pan2
		Svep1
		Ptprj
		Trip10
		Palm3
		Cradd
		Ltbp1
		Ndrg2
		Ecm2
		Slc35a1
		Men1
		Ppp4r4
		C030034L19Rik
		Slc35e4
		Samm50
		Ddb2
		Rasgrf1
		Gm15883
		Mta2
		Il17rb
		Cd74
		1700024P16Rik
		Fcgr3
		Sall2
		Fmo1
		Snord123
		Hoxa3
		Glt8d2
		Casp7
		Sertad2
		Prpf38b
		Ctf1
		Zfp398
		Tap1
		Itgad
		Fbrs
		Rce1
		Asphd1
		Amt
		Zbtb37
		Rai2
		Antxr2
		Fendrr
		Gm11744
		Gmip
		Spice1
		Igfbp7
		Kazald1
		Rere
		Ing5
		Hsd3b7
		Trp53i13
		Pacsin3
		Sntg2
		Gm4673
		Cd7
		Vwa1
		Slc16a7
		Snx32
		Hyal2
		6030408B16Rik
		Slc11a1
		Specc1
		Rnf144b
		Stra6
		Zfp444
		Nnat
		Mob3c
		Zkscan17
		Alad
		Slc1a3
		Slamf9
		C630043F03Rik
		Gm15417
		Megf10
		Baz2b
		Fbxo7
		Pwwp2a
		9330151L19Rik
		Fam120aos
		Tnfrsf14
		S1pr2
		Art3
		Gpr124
		Rad9b
		Uckl1
		Tmem26
		Phf1
		Cobll1
		Reps2
		Dguok
		Usp54
		Galk2
		Gnal
		A430071A18Rik
		Cd83
		Sf1
		Cnksr3
		Golgb1
		Slc9a1
		Nudt16
		Slc20a2
		H6pd
		Gm10524
		9330162012Rik
		Midn
		Arl10
		Hmga1
		Zdhhc1
		A930033H14Rik
		Sdc1
		Pik3ap1
		Galm
		Izumo4
		Hic2
		Shc1
		Phf21a
		Bco2
		5031434O11Rik
		Retsat
		Prps1
		Klre1
		Wdr34
		Ttyh1
		Zfp512
		Stab1
		Hs3st6
		Cxxc5
		Hic1
		Eva1c
		Pde1a
		Il18
		Prr12
		Timm21
		Atp5sl
		Btbd2
		C4b
		Zfp157
		4930546H06Rik
		Ivns1abp
		Dvl2
		Cxxc1
		Zfp707
		Prpsap1
		Thap3
		Zscan12
		Pgm3
		Myh2
		Syt3
		Gm9920
		Lgi2
		Mtag2
		Smad5
		Pdgfra
		Clec4a2
		H2-Q4
		Cnot3
		Rassf5
		Rgs4
		Cblb
		Sqrdl
		Ccdc62
		Mbtd1
		Fn3k
		Gm15545
		Inpp5k
		Ncoa1
		Pi4kb
		Gltscr2
		4930581F22Rik
		Ebf4
		Zfp358
		Neurl3
		Cic
		Neat1
		Gem
		Efemp2
		Chl1
		Mfsd10
		Cdk19
		Sema6a
		Cul7
		Parp14
		Gstp2
		Peli2
		Cdkn1b
		C230035I16Rik
		Sgpl1
		Slc38a6
		Alpk3
		Mill2
		Fbxl19
		Cd209g
		Ddx39b
		Zfp777
		Rpain
		Plekhg3
		Gm9992
		Gm4285
		Slc17a7
		Trim39
		Gon4l
		Ppm1b
		Khsrp
		Klf3
		Cd300lb
		Rn7sk
		Ppp1r15b
		2010016I18Rik
		Ush1g
		Susd2
		Plekha5
		Hspa2
		Terf2
		Alas2
		Clec3b
		P2rx4
		Fbxo10
		Lyz1
		Cdk2
		Aard
		1700029J07Rik
		Khnyn
		Ncoa3
		Coro2a
		Cyp1b1
		Pld2
		Sox12
		Gm14378
		Znfx1
		Pcif1
		Hcn2
		P2rx1
		Pla2g2d
		BC005764
		AU020206
		5430435G22Rik
		Grhpr
		Hs6st1
		Acsm5
		Ctso
		Myl9
		Irf4
		Ctnnd1
		Cd163l1
		Gm16168
		AI480526
		Gtpbp6
		Prdm2
		Crebzf
		Shf
		5430416N02Rik
		Brpf1
		Paqr4
		Ogn
		Gpr157
		Cd14
		Irf2
		Dtna
		Id1
		Slco2a1
		Plekho2
		5830403L16Rik
		Gm11205
		Astn2
		Gm17334
		H2-T23
		Asb2
		Nfxl1
		St3gal6
		Adamts1
		Timp2
		Zfp809
		Tmem178b
		Sfxn1
		Mllt6
		Gm5699
		Gm9885
		Ip6k1
		Klf4
		Suv39h1
		Cacna1c
		Galnt11
		Tctn2
		Mbd6
		Vcam1
		Gm13375
		Siah1a
		Fcgr1
		Rap2b
		Lamb1
		Lrrc17
		Arhgap10
		Sh3glb2
		Gm2415
		Gm20522
		Phf13
		Ces1f
		Eno2
		Col27a1
		Suclg2
		Igha
		Pstpip1
		Amigo2
		Efhd2
		Gmfg
		Klhl36
		Slc26a8
		Ubb
		Mroh7
		9430008C03Rik
		Fam98c
		D930048N14Rik
		Nphp1
		Angptl2
		Gigyf1
		C2
		Zfp629
		Dennd2a
		Gapdhs
		Naaa
		Aqp1
		Ppox
		Ddx19b
		Rgag4
		Ssc5d
		S100a1
		Fbxo21
		Mdfi
		Jup
		Ebi3
		G630016G05Rik
		Trp53bp1
		Bckdhb
		Rsph9
		9230116N13Rik
		Ebf2
		Tnfaip8l2
		Ccdc174
		Clvs1
		Col20a1
		Ikbkb
		Gstt1
		Prokr1
		Hdgfrp3
		Gsc
		Limk1
		Pdilt
		Cxcl14
		Gpr182
		Dpep1
		Eno3
		Hk3
		B230398E01Rik
		Slx1b
		Mrc1
		Dalrd3
		Agpat6
		Gm9828
		Nr2f1
		Pkdcc
		Isg20
		Wdr62
		Fam172a
		Bbs2
		1110037F02Rik
		Setd1a
		Mical1
		Hrct1
		Lrrn1
		Nupr1l
		Sult5a1
		Fads6
		Glis1
		Mettl6
		Soga1
		Tacc2
		Ppl
		Hpcal1
		Csf1r
		Gpx1
		Shroom3
		Rnf169
		Klhdc9
		Lzts2
		B130011K05Rik
		Txnip
		Tpm2
		Atxn2l
		Adc
		Spi1
		Clu
		Prkd2
		Hddc3
		Camta2
		C630016N16Rik
		Lhfpl4
		Wipf2
		Pced1b
		Slfn8
		Ntrk3
		Rem1
		Slc2a3
		Pde4dip
		Amotl2
		Hmg20a
		Smoc1
		Hivep3
		Gm27003
		Zbtb5
		Card14
		D930015E06Rik
		Glb1l
		Aoah
		Zyx
		Amph
		Lrrc47
		Pcf11
		Rgs10
		Tmem231
		Pdia4
		E130102H24Rik
		Ccdc8
		4930458D05Rik
		Foxf1
		Lrp12
		Rabep2
		Lrmp
		Tnfrsf11a
		Anpep
		Mfhas1
		Clec10a
		Acap2
		Mrvi1
		Chrne
		Gabbr1
		Mov10
		Zfp235
		Tcf7l2
		Sirt6
		4831440E17Rik
		Card10
		9130230N09Rik
		Mmp14
		Cited2
		Gstt4
		Pilrb1
		E030030I06Rik
		Rimkla
		Rbmx
		Klra7
		1700023L04Rik
		A530020G20Rik
		Chrd
		Scn1b
		Actn3
		Snx5
		Ncam2
		Bid
		Hnrnpa0
		Snrnp70
		Clk4
		Trim65
		Dlk1
		Uap1l1
		2900052L18Rik
		Mafb
		Arxes2
		Hsd17b11
		Shisa2
		Gmds
		Ptger2
		Tnip1
		Sema5a
		Unc5c
		E330013P04Rik
		Supt20
		Zfp36
		Fam188b
		Osbpl11
		Sdccag8
		Sfrs18
		Blcap
		Has2os
		Lrrc45
		Zc3hav1
		Lor
		Fnbp1
		Fam13a
		Mau2
		Rorc
		Dnase1l2
		Inmt
		4930412C18Rik
		Zcchc8
		Scara5
		Chrm3
		Bmper
		Maob
		Psmb9
		Cd300a
		Cxcl12
		C5ar1
		Stim1
		St6galnac5
		Pddc1
		Stat5b
		Grik5
		Il6ra
		Colec11
		Slc40a1
		Trit1
		Arhgap39
		Itpka
		Crebbp
		Gdf2
		Marveld1
		Ngfr
		Slc22a18
		Arhgap36
		St3gal4
		Ell
		Adssl1
		Sec16b
		Atoh8
		Dpep3
		Zcchc7
		E330009J07Rik
		Acvrl1
		Zfp683
		Zcchc11
		Pabpn1
		Gnao1
		Fbxw9
		B330016D10Rik
		Dtx3
		Cd27
		Lman2l
		Tesk2
		Ccnl1
		Ms4a4d
		Adamtsl1
		Gm20539
		Hrc
		Phf12
		Safb2
		Pld4
		Aldh9a1
		Sgsm2
		H2-T10
		Hp1bp3
		Usp35
		Rassf4
		Cytl1
		2010106E10Rik
		Ppap2c
		Akap8l
		Taz
		Ager
		Actg2
		Gpsm3
		Acad10
		Tctn1
		Ankrd16
		Inppl1
		Pard6g
		Ace
		AI607873
		Bcat2
		Brinp1
		Rnf114
		Clasrp
		Hif3a
		Syne2
		Pias1
		Tcp11l2
		1010001B22Rik
		Gm16892
		KCTD12
		Zfp775
		Trim32
		4930481A15Rik
		Gm21887
		Prg2
		Fbxl12
		Sephs2
		S1pr3
		Lcn8
		Exoc3l2
		Drp2
		Bzw2
		Mapk1ip1
		Mgst1
		F3
		Edc3
		Gata2
		2006-09-01
		1810010H24Rik
		Fgl2
		Ctps2
		Cast
		Taok3
		Gzf1
		Gm10030
		Trrap
		Crtc2
		Bcl2l11
		Sult1e1
		E4f1
		Clk1
		Bsdc1
		Tmem134
		Ddx17
		Cfp
		Gpx3
		Zscan26
		Clk2
		Tpsb2
		2310010J17Rik
		Tnrc18
		Fbxo38
		Mmp23
		Il18rap
		Elane
		Slc15a4
		Cadps2
		Phyhd1
		Nckap5l
		Fbxo44
		Irf7
		Sema6c
		Lama2
		Naga
		Steap4
		Cd86
		Leng8
		Myh11
		Slc37a2
		Shisa9
		Ptpn18
		Rhbdl1
		Klk10
		Otud1
		Ddhd1
		Dock9
		Kdm5b
		Hspa1b
		Slc16a9
		Dnase1l1
		Jun
		Snhg9
		Slc16a2
		Ifi204
		n-R5-8s1
		Rhbdf2
		Cd68
		Prr24
		Clcf1
		Lrrtm3
		5031439G07Rik
		Ubald2
		Zyg11a
		Adrb3
		Numbl
		Dgka
		Ier5
		Kmt2a
		Wdr24
		Fblim1
		Pid1
		Col6a5
		Poli
		Gm12992
		Slc46a3
		4930500J02Rik
		Gm6297
		Katnal2
		Xpnpep2
		Mettl7a1
		Net1
		Tbx6
		Gm26532
		Cryzl1
		Vstm2b
		Bdh2
		2700081O15Rik
		Nckap1l
		Tcirg1
		Rnf31
		Fxyd7
		Hs3st3b1
		Gm11131
		Setdb1
		Polr3gl
		Mat2a
		Phldb1
		Tmem43
		1300002E11Rik
		Srsf4
		0610007N19Rik
		Mrpl45
		Gstt2
		Grip2
		Zbtb34
		Gm26889
		Slc25a45
		Sfswap
		Zfp174
		2810407A14Rik
		Gm16973
		Mib2
		Tenc1
		Jph2
		Chrdl1
		Lrig3
		Tmem159
		Spic
		Gdf10
		Enpp2
		Cbx6
		2310001H17Rik
		Gm12279
		Mmp17
		Xpc
		Map3k12
		Ednra
		St6gal1
		Abca8a
		Elac1
		Dact3
		Nrf1
		Zhx2
		Uhrf1bp1l
		Btrc
		Steap2
		Smim19
		Aldh2
		D4Wsu53e
		Usp48
		Fbxo32
		Zcchc14
		Vmo1
		Prox2
		Cfd
		Clec4a1
		Fam124a
		Acp5
		Ggnbp1
		Slc29a1
		Sgpp1
		Pitpnc1
		Gm11602
		Gm7061
		Prr14
		Gdpd3
		Sox7
		Nlrc4
		1700055D18Rik
		Csnk1e
		Taf1a
		Kalrn
		Slc26a10
		Ripk4
		Slc9b2
		Nav1
		Sepp1
		Bmf
		Zfp110
		Ankrd10
		Gm12359
		Kdm2a
		Dhx57
		Agt
		Cyp27a1
		Fbxo31
		Slc4a11
		Penk
		Il2rb
		Pde11a
		Ube2i
		Vmac
		Epc1

## Sheet: Fig6C_Venn_UP
DEGs_AdipoqCre_only	DEGs_both	DEGs_gKO_only
Nrarp	Col6a2	Sorl1
Shroom2	Ifrd2	Lonrf3
Gm14444	Gstm2	Smpdl3a
Rps19bp1	Lnx2	Rassf3
Setd6	Tmem38b	Dtx4
Pdp2	Ak2	Npas2
Pex19	1700001L05Rik	Crlf1
Ptplb	Bscl2	Baiap2
Dnajc21	Faf2	Slc27a6
Supt7l	Slc36a2	Zim1
Pcdh1	Hsd17b4	Pth1r
Nav3	Scd2	1110038B12Rik
Dctn3	Hist1h2bc	A930017M01Rik
Kcns3	Atg13	Hfe2
Gm5436	1700010I14Rik	Mthfr
Glo1	Hprt	Slc2a5
Ntrk2	Psph	Myo10
AK129341	Lep	Col1a1
Cbr2	Nek6	Dapk1
Cd274	Setd3	Tex11
Edn1	Chst12	Phactr2
Tom1l2	Immt	Ank
Fam115c	Yaf2	Mtmr10
Gss	Tmem33	Ube2l3
Ppm1l	B430212C06Rik	Copa
Pitpnm3	Def8	Dcun1d2
Fam73b	Emc4	Cd3eap
Etfa	Immp2l	9230112E08Rik
Sowahc	C1rl	Psma4
Slc39a13	Sod2	Tatdn1
Qsox2	Atp6v1e1	Mrps22
Zfp423	Klb	Usp20
Tmem218	Glrb	Tmed10
Cd209d	Adal	Islr
Ptprb	Vps41	Capzb
Il20rb	l7Rn6	Akr1e1
Eltd1	Txnrd2	Tbc1d24
Mlip	Dda1	Ptgr1
Utrn	Exosc1	Nup50
Arhgap29	Itpk1	Ppia
Stk40	Lrrc8d	Sar1b
Gm4876	Phf17	Apobr
Tcfl5	Pfkl	Agpat2
Garem	Idi1	Parp1
Psmf1	Gm20634	Edf1
Fam83h	Bpifb6	Gm11437
Ctdspl	Nln	Mettl22
Akap1	Cystm1	Atp5j
Cbfa2t3	Mfsd8	Mettl9
Chchd6	Tspan17	Psmd11
Chi3l3	Angptl1	Kpna1
Map1lc3b	Adh4	Rab1
Mzt2	Rpp14	Gtf2e2
Slc35a2	Phospho1	Tnfaip1
Ganc	Itga6	Ctps
Gbf1	Magi1	Mrto4
Pxdn	Gbe1	Cox11
Mrpl38	Hist1h4d	Utp20
Slc25a29	Fez2	Fam45a
Pabpc1l	Cep76	Abhd17b
Sucnr1	Ubqln1	Ndufc1
Zfp783	Mrrf	Hdgf
Dock3	Hn1l	Pqlc2
Rab3a	Gmfb	Grk5
Krt222	Slc9a2	Tmem104
Lpin3	Usp46	Bmp3
Dcaf4	Lrrc59	Pmm1
Tysnd1	Hapln4	Anapc10
Gsto2	Fech	Kcnj2
Ppp1r9a	Med9	C030046E11Rik
Rasgrp2	Yipf5	Slc39a8
Agpat3	Tecr	D3Bwg0562e
Lrrc46	Ndufb3	Nmt1
Gm11670	Cdkl2	Vps53
Gm10687	Srp14	Lypla1
Ric3	Cab39l	Trmt112-ps2
Slc2a4	Trim67	Ttc39c
Lztfl1	1110008P14Rik	Inhbb
Slc25a33	Xrcc3	Letmd1
1700086O06Rik	Sfr1	Cdk5
Hlcs	Col6a1	Cct2
Fh1	Fas	Rpl13a
Zbtb38	Yif1a	Tmem184c
Dab2ip	Elavl3	Gm21743
Apool	Cables1	Riok3
Pim3	Pm20d1	Hsf4
Eva1b	Ttc7b	Trmt61a
Rfc4	Crtac1	Asap1
Pla2g12a	Sardh	Jkamp
Pir	Zhx1	Pcbd2
Ginm1	Tbl2	Arpc5l
Dst	Isca2	Grid1
Ehhadh	Tfb2m	Metap1
Gm26739	Fam222a	Ptger3
Gm6682	Tmco1	Akr1c14
Rab34	St7	Apex1
Map2k5	Dhx32	Eef1g
Slc3a2	Ufm1	Mterfd3
Tvp23b	Mtpap	Arl8b
Ppm1a	Parp3	Pcbd1
Abca3	Gm7665	Cinp
Gm872	Npr3	Sec13
Mkrn2	Gm13910	Ndufs4
Ube4a	Fasn	Gm11766
Mlycd	Top1mt	Selt
Zfp385b	Mpv17l2	Eif3c
Cdk16	Mrps6	Tmem63a
Slc12a5	Polr3g	Nid2
Capn9	Als2cr12	Gpr156
Sfxn2	Ccser2	Stx8
Sh3glb1	Crip2	Mdp1
Pnpla3	Lpcat3	Fam203a
Ptpn14	Slc25a19	Elovl3
Atp5l2	Ripk2	Cxcl13
Cd59b	Eif3j1	Slc35b1
Ubald1	Slc24a3	Nudt15
Kcnn1	4931406C07Rik	Nr2c2ap
9030617O03Rik	Fmr1	Pi4k2a
Abhd11	Gas2l1	Aimp1
Pgm2	Otud6b	Gm6484
Afap1l2	Nudt5	Dmgdh
Timp4	Msrb2	Ywhae
Itgb1bp1	C130074G19Rik	Wls
Tmed4	Sgcb	Larp7
Ccdc162	Srprb	Gatad1
Ppp1cb	Txndc15	Pdcl
Lrriq3	Zcchc17	Fat1
Gm9774	Ghitm	Manbal
Alas1	Mtg1	Ap1s1
Stmn3	Rexo2	Tubb4b
Ghr	Uros	Nedd8
1810062G17Rik	Col18a1	Fam49b
BC051226	Acn9	Rnaseh2b
Isca1	Mkks	Trip4
Sort1	3110040N11Rik	Calu
Selo	Snap47	Psmd2
Lcn2	Kif1c	C1qbp
Papss2	Cox15	Sephs1
Cd81	Pygl	Mrc2
Zfp612	Col5a3	Hmgcs1
Mettl16	Mpc1-ps	Bcas1
Hsp25-ps1	Atl3	Ipo5
1110019D14Rik	Hspb7	Polh
Ube2g1	Ece1	Ppp2ca
Plbd1	Dhdds	Ppp2r5b
Acad9	Ighg2c	Acss2
Mapre3	Smap1	Prdx4
Emc8	Map6	Golim4
Ptpn11	Nkd1	Eif2s3x
Ndufs2	Coq2	Cyp4a10
3830406C13Rik	Gm4459	Snx7
2003-03-01	Rars2	Fam101b
Tinagl1	Vac14	Coa4
Dll4	Ppip5k1	Caprin1
Gna11	Naa60	Eif2s1
Elp3	Ehd3	Gatsl2
Creb3l2	Znrd1as	Cct6a
Gpx4	Nsdhl	Uba5
Pcsk4	Fibin	Nexn
4921530L18Rik	Ptchd4	Ube2m
Atg2a	Psmd5	Eef1a1
Ppp1r16a	Med19	Mrps33
Mup18	Rtn3	mt-Nd1
Gstm7	Iffo2	Cops4
Ndn	Tnfrsf22	Saysd1
Abhd6	Parva	Pon2
Gm2a	Dnaja3	Igkv5-43
Slc25a25	Fbxo8	Lphn2
Tspan12	Nedd4l	Npm1
Nr1d1	Pwp2	Slc31a1
Raver2	Csde1	Bicd2
Ddt	1700123O20Rik	Gclm
Bphl	Hlf	Ran
Nf2	Phkb	Psmc4
Hoxb5	Bola3	Vapb
Jph3	Atf5	Ttc37
Rab3ip	Tmem205	Plxna1
Athl1	Vgll3	Gm6166
Gm9843	Dmpk	Rbm19
Pygb	Prkcdbp	Naa20
Cpne2	Poldip2	Il1a
Nfs1	Epdr1	Fam173b
Nudt19	Mpc1	2010107E04Rik
Ccdc64	Tsg101	Sdk1
Gm14165	Mrps14	Uqcrb
Polr2l	Cops5	Hr
Gm5805	Hfe	Fxyd3
Asrgl1	Gfer	Cmc2
Tob1	Taf12	Dpy19l1
G6pc3	Mmd	Atrn
Auts2	Ept1	Rangrf
Prr5	Pmpca	Col12a1
Dmwd	Maged1	Gtse1
Dcaf8	Leo1	Atic
Ppard	Gm13709	Yipf1
Lman2	Pcyt2	Bfar
BC029722	Mtrr	Tbl3
Cdpf1	Entpd6	Polr1e
Chst8	Wwtr1	Ykt6
Gm11539	Smim8	Gpatch11
Dtd1	Gamt	Ap4s1
Cdnf	Wbp1l	Vcp
Atp6v0e2	Mvk	Eif4g2
Amotl1	Bace1	Lctl
2210406O10Rik	Clpx	Ttyh2
Wif1	Ncbp1	Commd8
Arx	Rnf10	Unc50
6430573F11Rik	Pafah2	Anxa7
Unc13b	mt-Rnr2	Cyp2u1
Chi3l4	Snd1	Purb
Napepld	Nacc2	Gars
2310001K24Rik	Klhl13	Stam2
Aqp7	Sbk1	Gm12265
Ascl1	Lgr4	Gprin3
Foxred1	Slc25a10	Cmas
Ypel2	Duoxa1	As3mt
Tnfrsf10b	Gid4	Psmc6
Ccdc96	Apopt1	Ttf2
Tspan2	G6pdx	Mrps17
Slc25a16	Cth	Gpd1
Cdh5	Sqstm1	Brk1
Ankrd27	Gm16235	Ppp4r1
Cd209e	Slc25a39	Sh2d4a
Mlst8	Isoc1	Nus1
Sgce	Brpf3	Gm11940
Palmd	Paip2	Banf1
Slc2a12	Gm15501	Tmem180
Rab28	Hsdl2	Adh6-ps1
Bhlhe40	Pigs	Smdt1
Eif4e3	Cluh	Ogfod1
Chchd5	Ipo13	Pvrl1
Acpp	Tomm20	Qrsl1
Fam195a	Bcap31	Socs5
6030443J06Rik	Nploc4	Ndufa9
Dhtkd1	Aimp2	Pgs1
Cyp4b1	Scd1	Tango6
Lrrc28	1110018N20Rik	Mrpl44
Acss3	Cox7a2	Uchl3
Aktip	Hdlbp	Ehbp1l1
Ephx1	Pomgnt2	Tfb1m
Rpl31-ps8	Tfg	B2m
Arhgap23	Pno1	Cyc1
1300015D01Rik	Grlf1	Il1r2
Plxna2	mt-Co1	Ggcx
1810062O18Rik	1500011K16Rik	Tanc2
L2hgdh	Mien1	Rer1
A530053G22Rik	Bcl2l13	Nmd3
Rab6b	Mocs2	Lonrf2
2700046G09Rik	Copg1	Akr1b8
Trim44	Kcnb1	Prkab2
Cyb5d2	Bcl7b	Crem
Ifltd1	Ptgr2	Lrpprc
Acads	Mettl23	Arl6ip5
Gm3756	Mcee	Gm5096
Vegfc	Kif21a	Tnk2
Mcc	Trappc4	Rb1
Zfp651	Sult4a1	Cdk1
Hsd17b10	BC026585	Xrcc6
1700112E06Rik	Mc2r	Zfp947
Glyctk	BC003331	Actg1
BC023829	Swsap1	Fastkd2
Slc52a3	Gprin1	Pcnx
Sh3pxd2a	BC026590	Nsun2
Whrn	Ormdl2	Cope
Qsox1	S100a3	Tm9sf4
Ear2	Rhbdl3	Znhit1
Mical3	Fastk	Ncl
Cd209b	Phlda3	Hbs1l
Aldh1a1	Mrs2	Tuba1b
Aqp11	2015-09-01	Crcp
Pnpla2	Enpep	Poc1a
Mtus1	Tlcd1	Gosr2
Sema3g	Ttc19	Rrp1
Ldlrad3	Pdhx	Anapc15
Rps13-ps2	Trp53inp2	Dhcr7
Lyrm1	Grtp1	Pomp
Gfra2	Aldh1a7	Bmp2k
Optc	9630033F20Rik	Mtap
Abhd14a	Armc8	Pqbp1
Lats2	Carhsp1	Eif4g3
Eif4ebp2	4930402H24Rik	Cacybp
Ttll5	Tdrd7	Tomm22
Rhbdd2	Cib2	Alg8
Ppap2a	Loxl4	Pet100
Tmem143	Hagh	Taf13
Znrf2	Sucla2	Heatr3
Synj2bp	Pigq	Cks2
mt-Atp6	Mdh1	D830013O20Rik
Cyb5	Cpt2	Cdkn2b
Fam115a	Rhoq	Vps39
Ccnk	Commd3	Snhg12
Txlng	Cfl2	Uxt
Zfp872	E2f6	Tpp1
Gm684	Ccdc91	Timm9
Gsta4	Eif4g1	Pmm2
Plagl1	Lrrc3	Nol10
Myo6	Mthfsd	Stk38l
Arl15	Ociad1	Ankib1
Rufy4	Timm23	Uba1
Afap1	Mfng	Atp6ap1
Serf1	Actr1a	Zcrb1
Lysmd2	Immp1l	Mest
Akt2	Jakmip3	Tmem132a
Fermt2	Mycbp	Adra1a
Wfdc12	Gypc	Srp19
Aacs	Dap3	Ostm1
Ntng2	Prdx3	Vdac2
Isg20	Tstd3	Nipa2
Alkbh3	Bend3	Anxa2
Cxx1b	Ctage5	Ppdpf
Gm13688	Mcfd2	Vps33a
Grina	Ppapdc1b	Gm9696
5730409E04Rik	Rbm18	Srp54b
Cgnl1	Mrpl17	Pde4d
Pex3	Dap	Nubp1
Ptprm	Stambpl1	Aak1
Acat1	Aamdc	Dhrs7
Acy3	Lefty1	Chsy1
Cog4	Adap1	Pomc
Ero1l	Cops3	Nhlrc1
Hspb1	Ctr9	Usp12
Ube3b	Pla2g6	Gmppb
Slc5a6	Nckap1	Bmi1
P4ha2	Lyplal1	Nkiras2
Tgm2	Srpr	Rrm2
2210408F21Rik	Cpeb1	Aplp2
Amotl2	Tex2	Ube2d2a
Rpl9-ps6	Tpi1	Mthfd1
Arhgef12	Mpc2	Agl
Tmem5	Rnf11	Akr1b10
Gstm6	Cirh1a	Gm26588
Foxp4	Cops8	Ythdf1
Hsd11b1	Cry2	Pank1
Gm16323	Hspa9	2210016F16Rik
Dym	Mcur1	BC003965
Scp2-ps2	Dennd4a	Tspan31
Tm2d2	Slc25a35	Rab22a
Mlxipl	Chid1	D8Ertd738e
Gm12284	Arntl	Pgam5
Slc25a20	Asb16	Tmem258
Gm15345	Rtca	Zdhhc9
Dcbld1	Ipo4	Pdlim5
Gm11966	Creb3l1	Ube2a
Fam217a	Irak2	Chmp2a
Gatc	Matn2	Odf3l1
Aoc2	Sema3c	Mki67ip
Slc25a26	Ttc28	Timm8b
Nhsl2	Fam57b	Htatip2
Ankef1	Vdac1	Farsb
Prelp	Ghdc	Mllt4
Fam184a	Mrgprg	Mrpl28
Polr3h	Alg2	Chmp7
Paip2b	Ankrd13c	Rwdd2b
Mfn2	Nop10	N6amt2
Srebf1	Hspd1	Ube3c
Fhit	1700029I15Rik	Naca
Cmss1	Wbp2	Ell2
Adarb1	Tmem69	Pbdc1
1110032A03Rik	B230206L02Rik	Fbxo30
Cacng7	Echdc1	D10Wsu102e
Pllp	Setd7	Eef1e1
Snhg11	Akap12	Cct7
Rpl28-ps1	Tanc1	Fam20c
Gm16310	Ltv1	Copb1
Reep6	Kif1b	Robo2
Ddit3	Mrpl32	D19Bwg1357e
Prrg3	Prr16	Sdsl
Msi2	Fam69a	Gm8494
Adipor2	Slc7a6	S100a16
Cd164l2	Cdr2	Dnajb14
Fto	Sec23a	Aifm1
Fbxw8	Higd2a	Ccnc
Kctd10	Rps27l	Thoc7
Dcun1d4	Pak1ip1	Apoo
A430018G15Rik	Nap1l1	Drg1
Lrig1	Nfil3	Necap1
Cbs	Olfr1388	Cyp4a14
Morn2	Grpel1	Nom1
Bcat2	Reep1	Golga2
Bcl9l	0610009B22Rik	Mrpl13
AI429214	Ints7	Ecsit
Gzf1	Tax1bp1	Fabp5
Crat	Uso1	Luzp1
Sar1a	Cpped1	Pfkp
Gpr1	Rap1gap2	Clptm1
Pxdc1	Lyrm9	Mpp6
Gm10288	Pnldc1	Gm10076
Kif5a	Slc19a1	Bdnf
Nuak1	Coq3	Wdr36
Gsto1	Cisd1	Calm2
Ehd2	Dctn5	Fam104a
Cat	Kctd3	Bcl2l10
Rgcc	Usp16	Myef2
Gm12481	Eprs	Slc38a10
Mcph1	Rpe	Aven
Gm11273	Dolk	Agps
Rnf4	Ndrg3	RP24-176F12.8
D2Wsu81e	Txn2	Nck1
Fam19a1	Fam98a	B3galt1
Bod1	Psmb2	Med7
Mettl7a1	Lrpap1	Txnl1
Cbx4	Iscu	Aspdh
Slc13a4	Tmem59	Nhp2
Psat1	Arhgef18	Psmd10
Ywhab	Atp5b	Mtdh
Rdh5	Cops7a	Tmem234
Rpl10-ps3	Fam20b	Map2k1
Mtif2	Arhgef37	Pet112
Ubxn2a	Arhgap20	Emilin2
Tubb4b-ps1	Asap2	Cdc45
Sbds	Cd59a	Polr2m
Slc41a1	Pmvk	Sdhaf2
Tmem245	Ccdc125	Ncan
Daxx	Gucd1	Gm10642
Slc9a6	Pomt1	Atp6v1f
Ccbl2	Ttc25	Mapk8ip1
Plekha3	Cryab	A530072M11Rik
Vkorc1l1	Pabpc4	Stard5
Tsen2	Capn2	Wdr7
Trib3	Psme3	C330006A16Rik
Epg5	Lmtk2	Rnf5
Fam221b	Fkbp1a	Rtcb
Rapgef1	Srm	Asf1a
Rora	Mlec	Atg5
Mgl2	Sec31a	Golga3
Aldh5a1	Dfna5	Tnpo2
Tulp2	Clock	Cdc123
Angptl4	Pitpnm2	Larp1
Zfp438	Tsc22d2	Tuba1a
Fbxo22	Gpr125	Gps1
Mcam	Raf1	Rangap1
Bcas3	Esm1	Psmc3
Retnla	Tmem120b	Rpl9
Iqsec3	1110057K04Rik	Rabggtb
Ybx3	Lrrc27	Col8a1
Npnt	Lyrm7	Cct3
Nmnat1	Lactb2	Mmadhc
Prkar2b	Rbp4	Pcx
Lgalsl	Cnnm2	Abce1
Trappc5	Pkp2	Jak1
Alpk2	Hspa12a	Trappc1
Bcr	Dlat	Kcnh2
Abhd14b	Mmp28	Metap2
Cdc42ep1	Bccip	Fadd
Gm21971	Inpp5a	Gm13476
Ina	Egln1	Rmnd1
Sh3bp5l	Hrsp12	Rad23b
Tbc1d9b	Bet1	Psmb7
Zhx3	Mmab	Serp1
Insr	Atp2a3	Mff
Trim68	Dld	Hsp90ab1
Acad12	Nit1	Pdss1
Ppa1	Ggct	Lias
Ric8b	Lrrc57	Lepre1
Jazf1	Actl6b	Pdha1
Synrg	Cdkn1a	Mtor
Gm20621	Pfdn2	Tcp1
Slc1a1	Ccdc85c	Gm14325
Gm26534	Rabl6	Noa1
Insig2	2310061I04Rik	Naa25
Rnpepl1	Srp72	Colgalt1
Itpr1	Nkiras1	Srxn1
Eepd1	Stradb	Cald1
Focad	Ufd1l	Tollip
Heatr6	3110002H16Rik	Tmf1
Ppap2b	Nlk	Emc1
Anks1	Rtn4ip1	Zmiz1
Afg3l1	Atpaf2	Sec61g
Sipa1l1	Acbd4	Dph3
Apoc1	Uqcc1	Golm1
Tcta	Mtfr1l	Rars
Gm7936	Mrps2	Cxcr4
Gle1	Ccnd2	4930453N24Rik
Fgfr3	Ankrd40	Psma3
Gm12725	Tbc1d7	Cyb5d1
Fads3	Degs1	Pi4k2b
Gm11942	Mdh2	Adamtsl2
Ndufa7	Katna1	Unc79
Gm6444	Pnpla5	Vps29
Scp2	Alg9	Alg5
Axin2	Stra13	Eif2b3
Myo1d	Epb4.1l2	Vps4a
Rfk	Gfm1	Ppp2r1a
Kcnc3	Ube2k	Lsm3
Dusp19	B3galtl	Mrps23
Syvn1	Pmpcb	Polr3d
Pfkfb3	Cgrrf1	Clip1
Oplah	Gm13340	Slc15a5
Thnsl2	Tenm4	Morf4l2
Gm5578	Nt5m	Pex16
Emc9	Hist1h2be	Pdap1
Tmem109	Ubxn8	2007-09-01
Abcd2	Opa3	Tom1l1
Ogdh	Narf	Rwdd1
Rgp1	2002-03-01	Rab27b
Usp29	Nol3	Ptpla
0610040B10Rik	Mrpl42	Clns1a
Gstk1	Cox19	Blmh
Tmem216	Sycp3	Pdcd10
Cry1	Tlcd2	Abcg5
Pex26	Ptcd3	Tmed7
Nudt13	Plcb1	2810428I15Rik
Gm2000	Desi1	Colq
Atp5s	Arf4	Nek7
Gm10222	Lrrc24	Sqle
Moxd1	Pcyox1	Slc35f6
9130204L05Rik	Tsfm	Med1
Tgoln1	Tmem135	Gm15520
Ffar2	Prorsd1	Tmem199
Nfe2l1	Wdr61	Acsl3
Mid2	Tpmt	Rnf214
Exd1	Deptor	Fam120a
AU040320	Pecr	Tnfaip2
Nicn1	Ube2b	Yars2
Uck1	Hist2h2aa1	Carkd
Rpl36-ps2	Pde7a	Lman1
Kcnj16	Dusp10	Kpna2
Lrp11	Rpusd3	Pigc
Timp3	Fgf1	G630090E17Rik
Zbtb14	Dbp	Ttll12
Dlc1	Kpna6	Pgbd5
Acer2	Npc2	Ndufb10
BC018242	Lonp2	Tubgcp4
Zbtb7b	Apln	Sumf2
Dgat1	Idh3a	Pde7b
Shroom4	Laptm4b	Idh3b
S1pr1	Fam57a	Tmem18
Samd4	4833439L19Rik	Cdc37
Sik2	Fam126b	Cct8
Pparg	Gm4912	Mrfap1
Spatc1	Nog	Cacul1
Adcy6	Rnf144a	Ndufb4
Mpi	Extl3	Ugt3a2
Adck3	Cs	Pa2g4
Atxn7l1	Tmem14a	Bbip1
Elovl5	Aldoa	Zfand2a
Spg7	Ccng1	Eif5a
Gm14303	Fam114a1	Gapdh
Nqo1	Ifi27	Arl2bp
Tspan33	Gm5627	Pole4
Bag4	Gcsh	Etv4
Gm22482	Fam217b	Rabif
Amacr	Tspan9	Akr1c13
Pex5	1110058L19Rik	Gpi1
Fam174b	Aatk	Pcgf5
Hibadh	Coq10b	Orm2
Stk16	Dcaf6	Chek1
Zmat3	Memo1	Rps16-ps2
Amhr2	Ciao1	Fam136a
Tns1	Mttp	Frmd3
Eml5	1810055G02Rik	Traf3
Cd151	Eif2b1	Pitx3
Cdhr2	Ubl7	Nsd1
Phlda1	Sec22b	6330418K02Rik
Ccrn4l	Mettl1	Taco1
Spint2	Tmem70	Cox5a
Galnt18	Gm11520	Thoc6
Suox	Wipi1	Rnmt
Dtx2	Mast2	Tnfrsf23
Got1l1	Zwint	Pemt
Arhgef28	Ldha	Gm26885
Cd300lg	Tceb3	Minos1
Gpr180	Ccdc25	Lsmd1
Ctif	C1galt1c1	9630013D21Rik
4933427G17Rik	Rnf125	Mrp63
R3hdm2	Ppm1f	Rps2
Slc25a28	St3gal3	Ppic
Rfng	Pex7	Exosc9
Sap18	Ntsr2	Slc36a4
B3galt2	Rpap2	Gfm2
Gstm1	Tmem126a	Esyt2
Ywhag	Stt3b	Mapre1
Mylk	Dynlrb1	Uqcr10
Nkain2	Setd8	Hax1
Zfp131	2310045N01Rik	Tyms
mt-Co2	Ipp	Ccnf
Sec61a2	Lyrm5	Slain2
Gdap2	Nprl3	Vps35
Hpdl	Fah	Lox
Crebl2	Mvd	Prkrir
D2hgdh	D5Ertd579e	Nedd9
Aldh6a1	Zfyve21	Cmip
Syde2	Nif3l1	Hars
Oxsr1	Dad1	Snrpd3
Rxrg	Cltb	Bin1
1700009P17Rik	Dnajc24	Rpf2
St7l	BC056474	Kif2a
Trappc9	Klhl5	Qk
Notch4	Slc46a1	Slc22a2
Pdzd2	Vwa8	Mrps18b
Rgsl1	Smad2	Hspb8
Gm12251	Aptx	Aga
Cox8a	Arl16	Eif3b
Gja5	Cog6	2610507B11Rik
Tdrkh	Prdx6	Rwdd4a
Tmem42	Morc4	Ppp1r3b
Ehd1	P2ry2	Crnkl1
Becn1	Mrpl50	Uhmk1
Eif4ebp1	Rhod	Slfn9
Ccnd3	Dmrt2	Napg
Aoc3	Jmjd8	Fam50a
Tmem175	Psme4	Wdr70
Tsc2	Hdhd2	Esrrb
Robo4	Abcf2	Dars
Ccdc69	Lrrc39	Ubtd1
Ppp1r3c	Dynll2	Sec23b
Sptb	Sigmar1	Gm15179
Yipf3	Prkaca	Paics
Reep5	Mb21d2	Avpi1
9030407P20Rik	Olfm1	Mid1ip1
Ablim2	Zfp664	Map3k7
Pitpnb	Gpc4	Pcsk9
Ptch1	Ltc4s	Gm129
Cav1	Wdr12	Bub3
Tnpo3	Gtf2e1	Larp4b
Inca1	Fgf13	Slmo1
1810013L24Rik	Ei24	Cdv3
Gm14586	Elac2	Tmem256
Impdh1	Dbi	Setmar
Gm10250	1700037H04Rik	Ccne2
Gm10051	Amer1	Arap2
C330007P06Rik	Nap1l4	Gmnn
Tmem126b	Sez6l	Slc30a9
Ngly1	Cyb5b	Ap2a1
Scfd2	Spry4	Bud31
Ephb1	Cd99l2	Ppp2r5c
Tmcc3	Higd1a	Pofut1
9230110C19Rik	Kcnk3	Mc5r
Wdr89	Ndufv3	Ppp6c
BC024978	Gorasp2	Eef1a2
Nsun4	Hist1h2bj	Eif2s2
Erc1	Sparc	Uba3
Gm15772	Mtch2	Prkar2a
Rab1b	Pter	Nupr1
Cdc42bpa	Decr1	Mrpl16
Klhl42	Fam149b	Coa3
Gm12525	Bcl2l2	Ms4a1
Ppm1m	Mmachc	Slc35c2
Mbnl3	Slc25a17	Gm8894
Gm6807	Tmem209	Nudcd2
Dbt	Mapkap1	Acyp1
Fam107a	Med21	Bnip1
Gabrg3	Parp9	Ints4
Gm16439	Ubl4	Eapp
Gm7536	Prkce	Slc45a4
Mutyh	Lpgat1	Dtwd2
AA415398	Krcc1	Atp10a
Vangl1	Map4k4	Ndufaf6
Gm11532	Taf4b	Rcc1
Pcbp3	Apmap	Mrpl27
Stx17	Hadhb	Asf1b
Gnai1	Ranbp9	Rpp30
6530402F18Rik	Creld1	Psmd14
Apex2	Tefm	Chordc1
Lrrc4c	Uvrag	Tomm40l
Ctnnal1	Etfdh	Hist1h2ac
Klhl22	Stom	Sh3pxd2b
Jph1	Ints10	Xrcc4
Atn1	Klhdc10	Utp14a
Acox1	Bpnt1	Ndufb7
Rras	Pdzd11	2700060E02Rik
Abhd15	Deb1	B230118H07Rik
Tdrp	Mrpl10	Fam49a
AI597479	Gm9899	Dhrs3
Sprtn	Cisd3	Dph2
Zfand3	Mprip	Ptpn12
Fam213a	Tmem167	Serpinf1
B430219N15Rik	Rnf14	Chmp3
Farp2	S100a11	Tsn
Sdk2	Slc18b1	Kpnb1
Plcb4	Gm12236	Ahsa1
S100a14	Zfp106	Atr
Pclo	Bcar3	Atp6v1h
Slc37a4	Dhdh	Gna12
Tspan7	Sdhc	Gm10123
Kctd17	Mrpl49	Tmem41b
Cldn22	Tmx2	Msln
Ppp2r1b	Prss27	Pkm
Prex2	Zdhhc2	Pomk
Cbx8	Gyg	Spcs1
Osgepl1	mt-Cytb	Cmpk1
Dram1	Hist1h4c	Rnf217
Npr2	Gm6277	Pstk
Dusp18	Tulp3	Txnl4b
Rab3d	Lss	Ighm
Adck1	Acyp2	Atxn2
Dnaja4	Arfgef2	Gm561
9330159F19Rik	Sepsecs	Parl
Osgin2	Ccdc127	Slc39a9
Pkd2l2	2700089E24Rik	Cd55
Fzd4	Slc2a10	Nfu1
Cdc42ep2	Timm17a	Nfatc3
4933431E20Rik	Gadd45a	Haus3
Bnip3	Rabepk	Cspg4
Slc1a5	Nab1	Gemin7
Dtx3l	Syap1	Saa2
Aif1l	Ppp2r5a	Ephb2
Bbs4	Mmaa	Prep
BC002163	Snapin	2810430I11Rik
Ddx59	Fam110c	Prmt7
Sdr39u1	Trhde	Snx13
Tex261	Pcca	Psmd6
Asic2	Lrrc58	Fam149a
Rab9	Gtf2ird1	Ccdc107
1600014C10Rik	Scoc	Gm17147
Mtss1l	Tmem60	Nubp2
Gstm4	Dock5	AW551984
Slc35b4	BC031181	Cdk14
C78339	Ube2g2	Dnaja2
Lin52	Cdc42ep4	Sc4mol
Mecr	Uck2	Lsm6
Pnpla8	Anapc16	Atp6v1g1
Pdxdc1	Sncb	Ppp1ca
Ggn	Mtx2	Dck
Klhdc7a	Vamp3	Tmem9b
Ptrf	Emc3	Gm9892
Stc2	Btf3l4	Cyb5r4
Tbc1d20	Ergic1	Rraga
Gpr89	Auh	Commd10
Tmbim1	Lgals9	Mea1
Fktn	Cd320	Erh
Pigu	Sh3tc2	Thbs2
Wasf1	Tatdn2	Rab5a
Nrip2	Tmem182	Stx18
Map1a	Fam114a2	Bhmt
Nudt12	Tcf20	Irgq
AI118078	Akirin1	Lamtor4
Mrpl40	Lsm1	F5
Gm26877	Nomo1	Tceal8
Lmo4	Tceb1	Tmem242
Adhfe1	Ube2w	Snrpc
Mospd1	Sgms1	Nolc1
Gm13293	Hist1h1e	Tmem14c
Acaa2	Gstz1	Eefsec
Gm2673	Gm9939	Psmc5
Car5b	Orc5	Coq7
Gm15536	Prdx5	Exoc5
Nek9	Myo19	Ilf2
Rnf181	Clmp	Gm5540
Msrb1	Vldlr	Gm16515
Zfp697	Plekhh2	Furin
Gas2l2	Abcb10	Pgam1
Zfp532	Adcy5	Kti12
Pex14	Gnpat	Chmp1a
Surf4	Mrpl30	Alx4
Adra1d	Yap1	Cdc34
Hist1h2bb	Pgd	Msra
Tshr	Hebp1	Amy1
Adc	Homer2	Ddx1
Fbxo36	Mrps25	Hmgn2
Rfesd	Acsl1	Skp1a
C430042M11Rik	Aldh4a1	Atg10
Ttll7	Fgfrl1	Uchl5
Eif4a2	BC004004	Orm1
Gramd4	Usp10	Utp18
Mgll	Fbxl4	Mrap
Syde1	Emc7	Nudt2
Trip6	Aen	Nfkbib
Coq5	Jagn1	Atp5c1
Tmem57	Cd164	Timm13
Hipk1	Coasy	Chchd1
Bckdha	Cxx1a	Ubac1
Nadk	Gm10221	Mtfp1
Fbxl20	AU022252	Uqcrq
Ankrd46	Sdccag3	Dera
Insl6	Atg12	Plaa
Hcn4	Folh1	Dync1li1
Kank1	Zak	Mrpl43
Ppp1r16b	Sc5d	Mpdz
D10Jhu81e	Gm13703	Zbtb41
Efcab2	Aifm2	Ifngr2
Eya2	Svip	Abhd10
Zfp185	Myh14	Acnat1
Pfn2	Pea15a	Fras1
Chac1	Chp1	Zfp91
Lpl	Lyrm2	Ctsd
Gtf2h3	Ndufab1	Cox6b1
Sptbn1	Comt	Hist1h1c
Phf8	Ugt1a6b	Sgsh
Xpnpep3	2001-03-01	Acat2
Tprgl	Prrt4	Atp1a3
Epas1	Map7	Tkt
Ubqln4	Cbwd1	Mettl3
Fry	Unc5a	Kng2
Tnnc2	Pdrg1	Egln3
Fam150b	Idh1	Cpa2
5033403F01Rik	Sumo3	Mrpl12
Ccdc137	Trp53cor1	Tulp4
Cpeb3	Mogat2	Ephb3
Slc22a17	Tor1b	Sdf2
Cidec	Oxsm	Scfd1
Klf15	Rims4	Atox1
Sbsn	Gpt	Pyroxd2
Gm15408	Tank	Txndc9
Fbln2	Slc1a4	Senp2
2010107G23Rik	Pex13	Dnmt3l
Eci2	Trak1	Tdg
Ost4	Usmg5	Ndufs1
Cttn	Coa5	Med8
Zc2hc1a	Pelp1	Akr1c20
Mgst1	Gm10699	B4galt6
Fam89a	2010012O05Rik	Acaca
Efcab14	Klhl25	Psmd13
Rab38	5730508B09Rik	Nme4
Msrb3	Megf9	Vapa
Bsdc1	Ear11	Eaf1
Ispd	Tmem50b	Gm14410
Gm26705	Larp1b	Tubg1
Fuk	Spag4	Pip4k2c
Cdo1	Chmp5	Atf6
Echs1	Hist2h3c2	Stard4
Ccbl1	Lins	Timm8a1
Rint1	R3hcc1	Cdc42
Gm15551	Sorbs1	Smim20
BC030307	Dgat2	Rad17
Tmeff2	Orc2	Nbn
Fbxw2	Tspan18	Slc25a3
Wars	Usp24	Spryd4
Lpin1	Ipo9	Serpinh1
Cyp4f17	Gorasp1	Sumo1
Cecr2	Cntn2	Rap1gds1
Slc25a22	mt-Nd4	Pla2g2e
Dnajb9	Letm1	Tbce
Bmpr1a	Phtf2	Ube2j1
Mif4gd	Cd1d1	Tmem208
Ankrd42	Pef1	Pigk
Nol6	Mmgt1	2010003K11Rik
Abhd5	Ppp2r4	Fhod3
Camk2n2	Slc5a3	Rrp12
Dusp4	Osgin1	Ptk2
Gm13341	Itga7	Triap1
Rsph3b	Pin1	Ccdc47
Thrb	Mcts1	Mrps11
Ifrd1	0610010F05Rik	Xkr8
Fcor	Scamp3	Dse
Ficd	Slc16a1	Gba
Bcar1	Prmt5	Gcnt2
Rpl17-ps5	Slc35e1	Them4
Gm16861	Ppp1r3d	Rtn2
Serpina12	Scrn3	Rala
Mpp1	Zfp952	Ndufs6
Slc29a4	Ccnh	Fam213b
Pxmp4	1110002L01Rik	Ptges2
	Syp	Myl6
	Malt1	Copb2
	Vstm4	Tpd52l2
	Slc48a1	Ptrh2
	Aars	Commd7
	Alg3	Gm14328
	Hspb6	Ide
	Kpna4	2410015M20Rik
	Coq9	Rpl4
	Ap3s1	Nudt7
	E2f2	Map2k6
	Exoc6	Elovl6
	Ghrh	Ube2n
	Tln2	Nsfl1c
	Ubap2	Mapkapk3
	Irs3	Knop1
	Ak3	Tmem62
	Ryk	Thop1
	Mut	Spats2
	Fopnl	Ppcs
		Ctnnb1
		Gm12426
		Pfdn1
		Aldh1l1
		Lgals1
		Sfxn5
		Col15a1
		Gm11773
		Ces2e
		Ago2
		Eif4e
		Adk
		Acta1
		Vps37a
		Rsad1
		Svil
		Fam63b
		Mtpn
		Abcg1
		Sptan1
		Krt10
		Akap17b
		Zdhhc3
		Pabpc1
		Igbp1
		Uhrf1bp1
		Ssr1
		Micu1
		Tmco3
		Pwwp2b
		Strap
		Dgki
		2410127L17Rik
		Kctd9
		Lsm14b
		Arcn1
		Psma2
		Zfp462
		Dnlz
		Mettl21d
		Mrpl18
		Tesk1
		Sh3kbp1
		Tmem248
		Nutf2
		Pop5
		Myl12a
		Cyb5r1
		Hdac9
		Nudcd1
		Gm3571
		Snrpe
		Bop1
		Fam124b
		Atp6v0a1
		Pctp
		Caap1
		Cox10
		Dph6
		Kif21b
		Poln
		Gm26626
		Ppil3
		Eme2
		Tmed2
		Arf1
		Sco1
		Calm1
		Ddx21
		Abhd1
		Atp6v1d
		Haus2
		A830052D11Rik
		Eif4e2
		Dnajb12
		Nme1
		Trub2
		Wdr75
		Tmem183a
		Pdhb
		Gm18336
		E2f3
		Acadvl
		Col4a2
		Arl1
		Polr1d
		Cfl1
		C430014B12Rik
		Tor1aip2
		Pes1
		Nid1
		Uqcrfs1
		Podnl1
		Psmc2
		Gabarapl2
		Mrpl35
		Commd2
		Hal
		Rad23a
		Dtl
		Dhx29
		Parp6
		Rtn4
		Fhl1
		Gm10762
		Capza2
		Sec24d
		Nupl2
		Blvra
		Cnih1
		Gdf6
		Sacm1l
		Gale
		Hspg2
		Thbs4
		Prdx2
		Nat10
		Cops6
		Slc16a12
		Rnpep
		Fam192a
		Mbd3
		Atp1b3
		Pin4
		Ddx39
		Rad9a
		Sdhd
		Gm12796
		Cela1
		Mrpl41
		1600002K03Rik
		Hmgn5
		Clasp1
		Rbbp8
		Cyp51
		Hmcn2
		Cdk20
		Lacc1
		Lamtor1
		Mageb18
		Rpsa
		2310044G17Rik
		Emc6
		Lhfpl2
		Dnajc5
		Cap1
		Fer1l6
		Plin2
		Nol12
		Phf5a
		Hmbs
		Litaf
		1700007L15Rik
		Tnfrsf11b
		Ppp3r1
		Mrps28
		Igsf8
		Ldlr
		Snapc5
		Cars2
		Nabp2
		Zfyve9
		C1d
		Tbrg1
		Mrps7
		Vim
		Rabep1
		Gm12286
		Rpl7l1
		Tmem177
		Irak1
		Utp14b
		Cldn5
		Nras
		Elp5
		Dis3l
		Ict1
		Usp32
		Snapc1
		Emc2
		Orc4
		Brd7
		Aspg
		Psmb1
		Skiv2l2
		Otud3
		Rhot1
		Nsf
		Ebp
		Psmb5
		Pam16
		Wdr77
		Usp39
		Twf2
		Mob1b
		Sfrp2
		Nup35
		Traf2
		Taldo1
		Maoa
		Nos1ap
		Hspa4
		Sec61b
		Cct4
		Wdr59
		Acoxl
		Lsm2
		Dio2
		Timmdc1
		Gm24074
		Eif3a
		Psmd7
		Trappc2
		Smim7
		Actb
		Igfals
		Pam
		Eno1
		Otop1
		Cox7a1
		Tmem161a
		Gskip
		Mpzl3
		Snupn
		Mtch1
		Rsu1
		Heatr5b
		Tom1
		Actr10
		Insig1
		Ostf1
		Wdr1
		Exog
		Gtf3c3
		Gm13456
		Ints2
		Itih5
		Ndufaf4
		Dpcd
		Tmem167b
		Timm22
		Pomt2
		Agpat5
		Scrn2
		Gpr155
		Mgmt
		Snrnp25
		D17Wsu92e
		Fgfr1op2
		Rcbtb2
		Ntn4
		Hccs
		Ddx54
		Large
		Trappc13
		Rassf8
		Alcam
		Ubxn1
		Kank2
		Hsd17b7
		Usp15
		Rasl12
		Spag7
		Qpctl
		Mrps10
		Tmem147
		Csnk2a1
		Mgrn1
		Psmd1
		Slc2a2
		Mrpl55
		Hip1
		Mlf1ip
		Tssc1
		Nono
		Thg1l
		Stip1
		Oxtr
		Elmo2
		App
		Ndufa11
		Hvcn1
		Tmem79
		Atp6v1a
		2210015D19Rik
		Dnajc2
		Psmd12
		Ctsl
		Eif4a1
		Napa
		Ipo11
		Ptges
		Prkaa2
		Apoc4
		Insc
		Minpp1
		Rpl32
		Plxnd1
		Adpgk
		Atp6v0e
		Pdcd5
		Ccdc124
		Rpl22l1
		Cct5
		Rnmtl1
		Fabp7
		Tmem230
		Thoc5
		Osbpl5
		Tmem41a
		Ndufb5
		Rnf7
		1700021F05Rik
		Hephl1
		Hsd17b12
		Gm8730
		Fam188a
		4921531C22Rik
		Commd6
		Slc25a46
		Gnptab
		Fam122a
		Tbcd
		Eif5
		Cox20
		Hif1a
		Rdh14
		1110001A16Rik
		Me1
		Awat2
		Mrps18a
		Cyp2c38
		Srrm4
		Atp6v0d1
		Polr3k
		Xpnpep1
		Tyw5
		Uqcc2
		Slc39a11
		Col5a1
		Snf8
		Pla2g15
		Myh7b
		Mia3
		Hilpda
		Hist1h1d
		Syncrip
		Exoc4
		Swi5
		Sirt5
		M6pr
		Ndufs5
		Plch2
		Nol7
		Optn
		Ccdc167
		Adcy10
		Gm10110
		Nudt3
		Mapkapk2
		Xlr3c
		Mrpl23
		Azin1
		Mbtps2
		P4hb
		6330416G13Rik
		Bhlhe41
		Asna1
		Dusp3
		2610028E06Rik
		Mettl24
		Cnbp
		Itsn1
		Ube2f
		Ubap1
		Chpt1
		Kpna3
		Fbxo28
		Mbp
		Nfic
		Galnt1
		Ufsp2
		Eny2
		Eif1a
		Fgfr1op
		Elovl4
		Lurap1l
		Prr13
		Casp3
		Golga7b
		Atp6v0b
		Rrn3
		Lgals3
		Cycs
		Btbd10
		Atp5f1
		Hspe1
		Ptprq
		Actr3
		Lrrfip1
		Bmyc
		Ciapin1
		Ptpmt1
		Ighv3-8
		Vti1b
		Capn7
		Dbf4
		Psma6
		Copz1
		Mmp15
		Ptpn2
		Ppp1r7
		Acp1
		Kcmf1
		Lipo1
		Gckr
		Seh1l
		Ipo7
		Ptk2b
		Sftpa1
		Gdpd5
		Slc22a4
		1810022K09Rik
		Nars
		Twistnb
		AI597468
		Pdxk
		Cenpq
		Atp5l
		Mina
		Mrps21
		Ddo
		Iars
		Col4a1
		Dnm1l
		Gm26982
		Tubb2a
		Ikbkg
		Mcts2
		Rnf13
		Acly
		Wnt2
		Gltp
		Ankrd28
		Mapk6
		Map2k4
		Gtf2h5
		Cox7c
		D17Wsu104e
		Ttc33
		Cwc15
		Rsl1d1
		Ube2c
		Tomm70a
		Acbd3
		Pafah1b2
		Lect2
		B4galt7
		Akr1b3
		Nop16
		Ap3s2
		Foxk2
		Cln5
		mt-Nd2
		Rpl6
		Capza1
		Thyn1
		Angpt2
		Apoc2
		Ksr1
		Tspan6
		Exoc1
		9330159M07Rik
		Prss35
		Tmem80
		Smtnl2
		Naa50
		Ovca2
		Ppih
		Pcmt1
		Kif5b
		Etf1
		Fxr1
		Gm10516
		Atp6v1c1
		Vps36
		Prdx1
		Mlx
		Lamtor5
		Set
		Hsph1
		Dhrs1
		Bzw1
		Mmp3
		Acsf2
		Noc3l
		Abcd3
		Anxa1
		Itfg1
		Mrpl15
		Hras
		Itgb1
		Tsr1
		Utp6
		Atg9a
		Rhoc
		Tm7sf2
		Arhgef10
		Cd5l
		Serbp1
		Ppfibp2
		Ftsj3
		Zc3h15
		Clta
		Ccdc53
		Gm13610
		Rab32
		3110045C21Rik
		Ptrh1
		Tpm4
		Snhg6
		Eif1ax
		Naa15
		Tmed1
		Cript
		Gm17383
		Dynlt3
		Hsbp1
		Cse1l
		Nudt1
		Lbp
		Ptges3l
		Eef1b2
		Lrrfip2
		Recql4
		Angptl3
		Pqlc3
		Pdk1
		Tead4
		Rras2
		Ulk2
		Dpy30
		Bysl
		Slc39a7
		A230005M16Rik
		Ucp3
		Mark3
		Vdac3
		Usp40
		Ttc13
		Frrs1
		Necap2
		Masp1
		Polr2g
		Cdsn
		Gm15920
		Fbxo25
		Tex10
		Acnat2
		Usp38
		Prune2
		Clptm1l
		Paqr9
		Gtpbp4
		Hadha
		Lrdd
		Adam12
		Tars
		Dmtn
		Cyp7a1
		Gsg1l
		Tubb5
		Ap3d1
		Mal2
		Gsk3b
		Rpl15
		Eif2b5
		Rdh11
		Vta1
		Mbnl2
		Rad50
		Twf1
		Denr
		Igsf21
		Itfg3
		Ndufs8
		Pkp1
		Snrnp35
		Slc4a7
		Fancb
		Spryd7
		Cuta
		Ankrd50
		Rbm28
		Krt36
		Atg3
		Gm11808
		Dcun1d1
		Zbtb8os
		Nipa1
		Adi1
		Slc5a7
		Lamtor2
		Arhgap1
		Sub1
		Yeats4
		Ndufa8
		Wscd2
		Rragc
		Rqcd1
		Btd
		Saa1
		Ppp2cb
		Mphosph10
		Sars2
		Rbx1
		Creb3
		Brix1
		Ppil1
		Abhd17c
		Otub2
		Gga2
		Parm1
		Heatr1
		Taf9
		Eif3j2
		Cyb561d2
		Gm4952
		Gys2
		Phb
		Olr1
		Psmd8
		Psma1
		Cnep1r1
		Gramd3
		Gtf3c6
		Tbca
		B3gat3
		Serf2
		Mob4
		Zfp931
		Txndc17
		Abcf1
		Pgk1
		Mpdu1
		Srp9
		Ttc7
		Akr1a1
		Ccdc6
		Nudt4
		Ndufs3
		Ston1
		Spaca1
		Lzic
		Sepw1
		Ola1
		Gda
		Lace1
		Vma21
		Lynx1
		Ufc1
		Stx12
		Eml4
		Ndufb6
		Adora1
		Golga5
		Ppfia1
		Fgl1
		Mreg
		Palld
		Atp5o
		Rft1
		Efr3a
		Tm4sf5
		Lnp
		Taf11
		Wsb2
		Dnajc19
		Ndufa10
		Rmdn3
		Tle6
		Aasdhppt
		Klhdc4
		Vps45
		Esd
		Xpot
		Gas5
		Wisp2
		Timm10
		R3hdm1
		Sars
		Rpp40
		Plod3
		Fam21
		Man1b1
		Nol11
		Cdca7l
		mt-Tq
		Unc119
		Dcaf10
		Ino80c
		Uqcrh
		Zcwpw1
		Gart
		Peg3
		Sae1
		Ascc2
		Mrpl20
		Spg11
		Arpc4
		Elovl1
		Dtd2
		Fis1
		Drg2
		Nptn
		Trp53i11
		Armc1
		Pinx1
		P2rx6
		Tnfrsf21
		Slmo2
		Ptrhd1
		Nqo2
		Glrx
		Itgb5
		Tpcn2
		Cars
		G3bp1
		Armc6
		Gramd1b
		Trak2
		Apip
		Adamts5
		Slc25a1
		Fastkd3
		Ccdc86
		Rab2a
		Plxna3
		Bcs1l
		Habp4
		Chchd3
		Lars
		Spc25
		Gm11914
		Tfdp1
		Gpc1
		Ccz1
		Ap3m1
		Commd9
		Rnls
		Ptp4a2
		Atp6v1b2
		Gmpr2
		Ndufa12
		Vhl
		6430571L13Rik
		Slc18a1
		Clstn3
		Pyurf
		Ccne1
		Limd1
		Thrsp
		Lsm4
		Oxct1
		Anxa5
		Cox18
		Gltpd1
		Lage3
		Aes
		Gm14326
		Gnl3
		Supv3l1
		Ndufv2
		Psma5
		Ptgfr
		Psmd4
		Mdfic
		Asb12
		Rps3a3
		Ndufaf5
		Ranbp1
		Mrps15
		Wdr55
		Atp5g3
		Ly6d
		1110059G10Rik
		Coro1c
		Sssca1
		Aqp8
		Tma7
		Clybl
		Gab2
		Snx11
		Tomm5
		Ppp1r8
		Slc17a4
		Cilp
		Ppp2r3c
		Arpp19
		Slirp
		Serpinb2
		RP24-364K9.2
		Gspt1
		Slc30a6
		Usp14
		Bloc1s3
		Med16
		Rpl35
		Mrpl22
		Tufm
		Unc45a
		Ift20
		Elk1
		Dhcr24
		Sdc2
		Tmem97
		Ywhaq
		Spire1
		Atl2
		Lrrk2
		Cdc16
		Lcor
		Pafah1b1
		Atp5a1
		1810034E14Rik
		4930506C21Rik
		Eif3d
		Syt12
		Usp5
		Rrp8
		Lamp1
		Mtmr6
		Apoa4
		Polr2k
		Prelid1
		Psmc1
		Fdps
		Fbxo9
		1700066M21Rik
		Romo1
		Grsf1
		Slc11a2
		Tipin
		Rheb
		Ttc9c
		Leprotl1
		Tph2
		Rfxank
		2009-09-01
		Lmod3
		Maea

## Sheet: Fig6C_Venn_DOWN
DEGs_AdipoqCre_only	DEGs_both	DEGs_gKO_only
Abi2	Psd4	Spata2
Gldc	Nsg1	Rab9b
Sptlc2	Fads1	Gbp11
Shc2	Maf	Casp12
Zfp90	Dcn	Thbd
Gpr137b	Dock11	Zfp395
Blvrb	Gm13111	Bahd1
Rps6	Mrgbp	Ung
Lpxn	Il10rb	Pon3
Apobr	Gm4980	Uap1
Hat1	Olfml2b	Ifi27l2a
Ighv1-76	Ube2e3	Smyd1
Ino80d	Plekhn1	Phka2
Gdpd2	Serpinb8	Znrf2
Mcm3	Aif1	Zfp503
Ercc6	Lmo2	Disp2
Loxl1	Pf4	Serpina3b
Slc38a1	Cyp2e1	Nampt
Aftph	Slc2a4rg-ps	Rnf19b
Frem1	Plekha4	Ccdc80
Mmp27	Asl	Rnd3
Zfp111	Arrb2	Dixdc1
Atp1a1	Ddah2	Fam160a2
Impdh2	Fyb	Hsd11b2
A930011G23Rik	Ms4a7	Itm2a
Snx24	Kcne4	Adap2
Arf2	Tuba8	Tacc1
Plxdc2	Fhl3	Suv420h2
Sox4	Erap1	8430419K02Rik
Serpinb1b	Sema4d	Srrm1
Cerk	Rbm43	Scn5a
Ngfrap1	Atp8b4	Fam120b
Cdk6	Asph	Nudt6
Tubb6	Asap3	Plekhg2
Metrnl	Sgk3	4833418N02Rik
Cdon	Cers6	Siglech
Rab37	Slc2a9	BC037034
Aig1	Sirpa	Cbx7
Tmsb10	Cd300ld	Gm20033
Cbfb	Arhgap9	Ptplb
Rpl37	Cyth4	Rprml
Il1r1	Hmha1	Wdr33
Hs1bp3	Samhd1	Gm17705
Spsb2	Pold3	Cryaa
4922501C03Rik	Tmem191c	Nova1
Msl2	Tnip2	Sin3a
Armc2	Noxo1	Ldb1
Tor3a	Vit	Lmbr1l
Nsa2	S100pbp	Pacs1
Ppp4c	Fam102b	Hmgn3
Aggf1	Fcamr	Gm16266
Fam110b	Fam178a	Car3
Larp7	Psmb8	Gm15912
Ctbp2	Dennd1c	Ttll2
Ppapdc1a	5730446D14Rik	St5
Rgs17	Parp12	Twist2
Scpep1	Fzd1	Fam117a
Wdfy1	Slc6a2	Acin1
Nr6a1	Clec12a	Zmat1
Setbp1	Id2	Rnf152
Ptpn6	Lcp1	Med12
Stx4a	B4galt3	Adrb1
Fbp1	Lima1	Kdsr
Cmtm7	Tpsab1	Tmem158
D630033O11Rik	Aph1c	Aldh7a1
Atp6ap2	Ifi205	4933406I18Rik
Klc4	Appl2	Wdr45
Msl3l2	Ltbp1	Irf5
Clcn7	Ecm2	Trim56
Fgg	Sertad2	Abhd14b
RP23-199B2.4	Zfp398	Epb4.1
D11Wsu47e	Antxr2	Fignl2
Cdc25a	Gmip	Ccl19-ps1
Mgat2	S1pr2	Myo1b
Prdx4	Gpr124	Iffo1
Ckb	Cbr3	Tmem53
Adora3	Dvl2	6720401G13Rik
Tpm3	Lgi2	Spon1
Tns3	Neurl3	Inpp4a
Akt3	Gem	Trim26
Mrgprb2	Cdk19	Tmeff1
Tmem181b-ps	Sgpl1	Mycl
Qpct	Fbxl19	Kansl3
Fbln1	Clec3b	Lrp1
Jakmip1	P2rx4	Lgals12
Nxph3	Ncoa3	Med28
Igkv5-43	Cyp1b1	Jund
Kif3c	Hs6st1	Stard8
Csf2rb	Plekho2	Camp
Tgif2	H2-T23	Stx16
Tfpi	Mllt6	Rtkn
Cadm1	Fcgr1	Slc38a7
Igkv1-110	Rap2b	Rdm1
Fcgr4	Igha	Ppp1r12b
Rpl30	Pstpip1	Axl
Reep3	Zfp629	Scn7a
Naa20	Ssc5d	Gpr81
Fchsd1	Tnfaip8l2	Tmem88b
Ero1lb	Gstt1	Egfr
Stxbp5	Limk1	Plekhf1
Tnfrsf1b	Hk3	Accsl
St3gal5	Nr2f1	Txndc5
Rufy1	Spi1	Klhl2
Whsc1	Lrp12	Gm12258
Dpt	Lrmp	Camk1d
Zfp521	Tnfrsf11a	Zfp606
Rps8	Mfhas1	Klhl21
AI504432	Mov10	Snrk
2700029M09Rik	Hnrnpa0	Ier2
H2afz	Bmper	Tmem170b
Map2	Cd300a	Jam2
Mocos	Slc40a1	Gm12758
Pmp22	AI607873	Tcea2
Ccl3	Fgl2	Chdh
Serpina3g	Tpsb2	2010001M06Rik
Vps18	Mmp23	Ttc17
Tctn3	Slc15a4	Serpina3i
Fancl	Ptpn18	Meis1
Camk1	Dnase1l1	Pde3b
Apob	Slc16a2	Gabre
Igfbp4	Ifi204	Gfra3
Ccdc30	Ier5	Gm17491
Spred1	Kmt2a	Hpca
Rasal3	Tcirg1	Rspo3
Got1	Cbx6	Maz
Ldlrad4	Ednra	Clec9a
Rpn1	St6gal1	Cnppd1
Zbp1	Trim21	Ccl12
Kcnd1	Dleu2	Eepd1
Galnt12	Mmp2	Otud5
Crispld2	Nfatc4	Tap2
Serpinb6a	Usp11	Neil2
A630033H20Rik	Tyrobp	Recql5
Zbtb17	Cmtm3	Rad51d
Wfs1	Cyp2f2	Zbtb20
Tfeb	Mamdc2	Ppap2b
Homer3	Cma1	Vamp2
Cacnb3	Tlr13	Grem2
Fut10	Add3	Mst1r
Ctsz	Atp2b1	Cirbp
Flrt2	Pirb	Ccdc71
Tmem106a	Vill	Gm17251
Rpl26	Rhou	Id4
Cdc25b	Trim12a	Tcf7l1
Aprt	Obsl1	Gm13861
Kcnk6	Prss34	1700113A16Rik
Gpc6	Rbm5	Slc9a3r2
C77080	Cd63	Rbbp6
Scarb2	A230050P20Rik	Plp1
St6galnac4	Dnase2a	Ldhb
Snx20	Swap70	Rarg
Lrrn2	Hpgds	Nmb
Akr1b8	Bach1	Rffl
Pou2f2	Ncf2	Prtn3
Ctsa	Angpt1	Wtip
Plekha2	Man2a1	Nmi
Dnm3os	Sned1	Tst
Pianp	Plau	Agpat9
Tspyl3	Eif4b	Il6st
Pld3	C920006O11Rik	Fnbp4
4930404N11Rik	Gas1	Slc25a29
Thbs3	2610020H08Rik	Slc12a7
Wsb1	Pros1	Fndc5
Ikzf1	Parp10	Shcbp1l
Casp1	Sh3bp2	Rnasel
A130049A11Rik	Mitf	Vmp1
Bicc1	Bhlhb9	Zfp2
Mfsd12	Irf1	Ccl24
Lrp4	Dlg4	Scn4b
Anapc15	Spp1	6330419J24Rik
Rps14	Unc93b1	Cacng4
Clec4d	Frmd6	Tmem260
Sms	Msantd2	Strip2
Mctp1	Rcn1	Olfr1033
Ptpro	Endod1	Ntn1
Col4a5	Col6a6	Mapk8ip3
A430104N18Rik	H2-M3	Zrsr1
Trac	Txn1	Zfp703
Chaf1b	Dennd4b	Letm2
Cnrip1	Lgi4	Nynrin
Map3k9	Mcpt4	Dusp16
Rab8b	Vnn3	Mettl20
Sat1	Plcl2	Map1b
Ppp3ca	Arhgef10l	Akap8
Sp4	C7	Mfsd7c
Htr2b	Epc2	4933439C10Rik
Syne1	Epsti1	C5ar2
Rbpj	Srpx	Zbtb39
Oasl1	Lypd1	Rbm33
Atrx	H3f3b	Mnt
Klhl6	Fmnl2	Kcna2
Fam171b	Slc35e4	4932441J04Rik
Hn1	Fcgr3	9530082P21Rik
Vdac2	Itgad	4930524O07Rik
Layn	Specc1	Lta4h
Igkv1-135	Mob3c	Mcmbp
Emp3	Zkscan17	Triobp
Gm15156	Slamf9	Rchy1
Bax	Tnfrsf14	Wrnip1
Apobec1	Galk2	Clip3
Pzp	Cd83	Mir5125
Itih3	Nudt16	Kcnc3
Galnt7	Hmga1	Pde1b
Smarca1	Il18	Bnc2
Gm11427	Pdgfra	Gm17057
Amdhd2	Rassf5	Siglece
Syk	Efemp2	Ptafr
Armc7	Chl1	Oplah
Rims3	Mill2	Rhobtb1
Dzip1	Gon4l	Rassf6
Gsdmd	Susd2	Nnt
Ly6c2	Coro2a	Cryl1
Eid1	AU020206	N4bp2l1
Rcn3	5430435G22Rik	Gm21781
Dnajc18	Ogn	Accs
Pak1	Cd14	Gm10605
Cyfip2	Astn2	Cpxm1
Erv3	Timp2	Alms1
Smim3	Vcam1	Zfp646
Tnfsf8	Lrrc17	Gpsm1
Snrpg	Arhgap10	Gm16675
Fam76b	Eno2	Ccdc3
Tpsg1	Hpgd	Hipk3
Gimap7	Mdfi	Rock2
Vat1	Ebi3	Gm16230
Cacna2d1	Col20a1	Gpr20
Gpr126	Hdgfrp3	Fbxl22
Glipr1	Pkdcc	4933406C10Rik
Cyp4a14	Fam172a	Bmp2
Col24a1	Slc4a4	Vezt
Fnip2	Mical1	0610009E02Rik
Pla1a	Soga1	Bin3
BC017643	Slfn8	Thumpd2
Fcer1a	D930015E06Rik	Mir17hg
Zfp354c	Rgs10	Ivd
Gns	Acap2	Zmym3
Serpina1c	Mmp14	Gm14454
Galc	Actn3	Plcl1
Asah1	Snx5	2009-03-01
Arhgdib	Uap1l1	Cant1
Msr1	Hsd17b11	Mdm4
Apbb1ip	Lrrc45	Adra1b
Calm2	Zc3hav1	Adam2
Tnfaip8	Psmb9	Dxo
Dock10	Gpsm3	Cyb561a3
4931440P22Rik	Pias1	Pcgf2
Luc7l3	Taok3	5031425E22Rik
D330045A20Rik	Clk2	Prodh
Gcnt1	Il18rap	C1qtnf1
Was	Naga	Tcf21
Plxnb1	Lama2	Gm454
B4galt5	Otud1	Tbc1d17
Ms4a2	Jun	Pced1a
Mcm6	5031439G07Rik	Prss53
Plekhm2	Xpnpep2	Pck2
Eps8	Slc25a45	Slc4a3
Rps27a	2310001H17Rik	2810459M11Rik
Arpc3	Fbxo32	AF251705
Col28a1	Usp48	Adamts12
Hnrnpdl	Sgpp1	Irak1bp1
Guca1a	Slc26a10	B4galnt1
Slfn2	Nav1	Tfap4
Wdr7	Ankrd10	Rbbp4
Slc25a48		Prr5l
Gm15931		Dpm1
Myof		Tshz2
Amot		Rasd1
Serpinb1a		Mboat7
P2ry6		Klf2
Man1c1		Ctdsp1
Nsmf		Dennd2d
Dip2c		0610030E20Rik
Dapp1		Tnks1bp1
Mmgt2		Foxj2
Npc1		Xylt2
Fat3		Dtnb
Jpx		Sec24b
Hgd		Fmo5
Tgfb1		Myom1
Il13ra2		Slco2b1
Fgd4		Gm16008
Sdc3		Fos
Ogt		Ccnj
Slc12a6		Mark2
Col8a1		Whamm
Tmem173		Cd209f
Cndp2		4933427D14Rik
Tcea3		Thpo
Pcna		Porcn
Arhgap6		Sh3d21
Ptbp3		D730003I15Rik
Runx1		2210018M11Rik
Hectd2		Aco1
Abhd8		Pnn
Rgn		Zfp369
Pcsk5		Lrfn4
Gna15		Abhd3
Stxbp3a		Scaf4
Arl11		Rasgrp4
Acer3		2900005J15Rik
Lipa		Sdf4
Igkv2-112		Zfp36l2
Colgalt1		Nrbp2
Emilin1		Fut11
Tph1		Cabin1
Fmnl1		Lyl1
Pgm5		Snx33
Prkx		Tapt1
Mfsd7b		Smg6
Renbp		Slc22a23
Chst3		Fance
Adamtsl5		Plagl2
Nrp2		Paqr3
Creb1		Ecm1
Phf20		Lmod1
Prpf39		2810008D09Rik
Slc39a12		Nr1h2
Syngr1		St8sia3
Axin1		C3ar1
Myo7a		Poc1b
Atp13a2		Ephx2
Cd109		Fam46a
Rpl36		Pola2
Traip		Trpv4
Gas7		Slc25a23
Mnda		Ptpn14
Zdhhc20		Mucl1
Gpr162		Irf3
Ankrd12		1700001O22Rik
Zfp882		Mertk
Cnr2		Prrt1
Ttc36		Fancc
Fcer2a		Adam15
Ighv3-1		Avpr1a
Igkv6-25		Gm13594
Snrpf		Flcn
Nt5e		Sft2d3
Tgfb2		Cdc40
Cln8		Csf1
Skap1		Ces1d
Lck		Oard1
Ighv6-3		Zfp28
Mrgprx2		Nab2
Mkrn1		Zfp866
Samd14		Zfp865
Dennd1b		Fam210b
Cd200r3		1500026H17Rik
Rhoj		Zbtb43
Atpif1		Gm16253
Ighv10-1		Fgf2
Cln3		Stard13
Hook2		Gm15535
Ttyh3		Smarcc2
Fam134b		AI838599
Matr3		Ext1
Zfp217		Slc9a9
Plek		Cenpv
Pkib		Cluap1
Gm26669		Klrk1
Prss46		Acsm3
Pip5k1c		Timp4
Gm9770		Trim41
Gm11382		Prpf40b
Cpe		Hopx
Uox		Gm14286
Slfn9		Cd97
3632451O06Rik		Nptxr
Rnaset2a		Mgst3
Naalad2		Gm9458
Amz1		Acadsb
Rbp1		Dok2
Irgm1		Gm23134
Gpr183		Xbp1
Tbxas1		Gm10037
Dsel		Npepps
Gpsm2		Itgb4
Sp140		Pln
Cd72		Dennd1a
Tmem178		Camk2n1
Frmd4b		Dok7
Tgfbi		Rasa4
Tat		Birc2
Gabra3		Fam174b
Tmem189		BC051226
Ptprv		Tcp10b
Il11ra1		Sox10
Tmem82		Zfp592
Ighv1-81		Unk
Rsl1		Map3k7cl
Adar		Zfp821
Ssbp4		Nfia
Pfdn5		Zfp94
Rps27		Kat6a
Apba1		Rwdd3
Hhipl1		2810410L24Rik
Rasa1		Echdc2
Mrgprb1		Gm11816
Hck		BC035947
Grb2		Zbtb42
Zmynd15		Pcnt
Fam105b		Klrb1c
Cyp11a1		Gm12216
2001-03-01		4930599N23Rik
Ank1		Sorbs2
Pqlc1		Kctd6
Exoc3l4		Laptm5
Bcl2a1b		Chst15
Rbm26		Cyr61
Diap1		Rapgef2
Pot1b		Myo1f
Bbs12		Kansl1l
Ccar1		Zdhhc18
Abracl		Ddr2
Arap1		Neu1
S100b		Hes7
Dkk3		Gm16124
Zfp748		2810032G03Rik
Zfp704		Clec4n
Gm15726		Cplx1
Oas1a		N28178
Dbnl		Adamts14
Cyb5r4		Fam76a
Gpr34		Ccnl2
Slc27a2		Aff1
Picalm		Plcd1
Fam211a		Spats2l
Itga9		4933429H19Rik
Mef2c		Stx1b
C1s		1700048O20Rik
Zfr2		Cyp1a1
Flna		Ppp4r1l-ps
Arhgap30		1600020E01Rik
Zranb3		Cdkn1c
Tenm3		Spry2
Tmx1		Galnt10
Gm10521		Celsr2
Trim5		Tinagl1
Susd3		Grcc10
Pik3cg		A4galt
Srpk3		2008-09-01
Sp110		Fmo4
Kdm1a		Ppp1r9b
Sestd1		Kdm5d
Col3a1		Hrk
Isyna1		Foxo4
Rad51ap1		Igkv8-21
Creg1		Gm16348
Vav1		Slc8a2
Tbc1d10c		Lrch1
Stag1		Hexdc
Dock2		Zscan25
Pitpna		Ndst2
Lrrcc1		1110020A21Rik
1500015O10Rik		Nr3c2
Taf5		Abca6
Chn2		Gpr152
A430093F15Rik		Atp6v1g2
Gusb		Yeats2
Terf1		Clcn2
Ifi47		Tmco6
Tifa		Synpo2
Khdrbs1		Srrm2
Rps13		Smim5
Shfm1		Nfatc2
Olfr111		Coro1b
Stat4		Sbf2
Cd3g		Kmt2e
Mgea5		Gpr137c
Mtss1		Fbxo45
Mug1		Zfp598
Plk2		Slc43a1
9530077C05Rik		Gnb4
Igf2r		Dgkb
Tlr6		Drd1a
Apoa2		Zfp513
H2-T24		Pbx2
Clip2		4833420G17Rik
Kcnn4		Patz1
Cd9		Cdh2
Ptpn1		Igkv10-94
Cst7		Rfx1
Cygb		Agbl3
Btk		2810055G20Rik
Gpr137b-ps		Aldh1a3
4930506M07Rik		Aldh6a1
Sfmbt1		C730034F03Rik
Il1b		Fcgrt
Il13ra1		R3hcc1l
Cd300lf		Aox3
Aldh16a1		Src
Arpc2		Acot4
Arid2		Six5
Jmjd1c		Rbak
Pax5		Phkg1
Pycard		1810024B03Rik
Tnfsf13b		Per3
Cpsf6		Nr1d1
Leprel2		Ddx26b
AA414768		Vamp1
Rftn1		Galk1
Itgb3		Raver2
Fabp3		Pex11g
Igkv1-133		Chd2
Dcaf15		Mum1
Ak8		Pigl
Rarb		Dido1
Fam102a		Lilra5
Tmem132d		2510046G10Rik
Clic1		Lrrc4
Impa2		Gsn
Zc3h12d		Evi5l
Pim1		Nxpe5
Dek		Gng7
Syt11		Rapgef3
Padi2		Itga8
Pde8b		Dct
Adrbk1		Zkscan3
Pigr		Morc2a
Il15		Shpk
Galnt6		Fam129a
Cd79a		Elmod3
Tmem215		Trmt1l
Anxa3		Mogat1
Golga7		Prf1
Sart3		Dcp1b
Impa1		Trim11
Hmgcs2		Lama1
Zfp563		Baiap3
Spn		AA465934
Zdhhc14		Sox5
Fnip1		Cep95
Madd		Gm14872
Gm5421		Mpg
Pou3f1		Gm26684
Tpt1		Mxd1
Plxnb2		Gstt3
Igkv1-99		4931406P16Rik
C1ra		Drap1
Dis3l2		3830408C21Rik
Nagk		1110054M08Rik
Cyp7b1		Gm8619
Mdk		Irs2
2700094K13Rik		Ssh2
Cdk18		Ctdsp2
Zfp715		Irs1
Rassf2		Snx30
4933439K11Rik		Gm26924
Ikbke		Ppef2
Bak1		Sctr
Tmem206		Fcer1g
Ccnt2		Cabp4
Tor2a		Ccar2
Igkv12-44		Zfp963
Gm10736		Luc7l
Gadd45b		Adamtsl4
Tmc4		Pdk2
Slc45a3		0610043K17Rik
Akt1		Hoxc4
Gnmt		Zc3h4
Gm8186		Map4k2
A630001G21Rik		Cldn26
Igsf10		Gm8097
Xpo1		Fam193b
Mkl2		Chst1
Coro1a		Cnn1
Slc6a4		Sprn
Rnh1		Inca1
Tcf23		Msl1
Stk3		Ogfod3
Limd2		Tcn2
Zfhx4		Gatm
Pepd		Gm17597
Itih2		Osbp2
Alb		Fgd2
Plekha6		Cadps
Ap2m1		Gas6
Sla		2610035D17Rik
Soga2		Dcaf8
Tmx4		Anxa9
Rpl7		Zfp580
Plac8		Pcdhga9
Plod2		Lao1
Etnk2		Ctsc
Plcg2		Gm10602
Tmem144		Mtmr14
Ppib		Frs3
Gas2l3		Dpy19l3
Rab19		Thra
Ambp		Cers4
Slc7a2		Zbtb7a
Pi16		Tfdp2
Slit2		Ppp1r14a
Marcks		Car1
Idua		Gpnmb
Slc16a3		Zfp764
Chic2		Zfp426
Scn3b		Abi3bp
Tspan5		Gm13091
Azgp1		Usp21
Eif3m		Kcna6
Fgf7		Fut8
Bsn		Aox1
Mndal		Des
Dync1i2		Rassf1
Gm16315		Grasp
Clec4e		Adck5
Cap1		Acrbp
Fes		Asb13
Srgap3		Mospd3
Ninl		Serpina3j
Fzd7		Podn
Iglv2		Aasdh
Zfp811		AW011738
B4galt1		Fam134a
Ces2g		Gpat2
Myo9b		Arx
Rpl39		Pigz
S100a7a		Btc
Ten1		Cox17
Itgav		Slc35f5
F9		St3gal1
Matn4		Rab15
Gdf15		4930556M19Rik
Ror1		Ephb4
Selm		Grb14
Mfsd11		Phlpp2
Col1a2		1700019G17Rik
Champ1		Adrb2
Plxdc1		Il18bp
Zfp259		Klhdc8b
Il9r		1700030K09Rik
Ptgs2		Slc27a1
Ces3a		B230322F03Rik
Herc6		Col23a1
Efr3b		Cntfr
Sbk2		Tbx1
Acot11		Endou
Pknox2		Rev1
Slc17a9		Tbkbp1
Gfra1		Ppp6r2
Dok1		Plekho1
P4ha3		Mepce
Pglyrp2		Dcst1
S100a9		Zfp954
Rps6ka2		Vwf
Slc25a13		Slc43a3
Loxl3		Tagln
Psip1		Sp1
Hcst		Tm7sf3
Atf3		Ttc38
Ppp1r35		Zfp516
Cdk5rap2		Lrch3
Skap2		Naprt1
Rpl8		Agbl5
Rab3il1		Trim47
Ighv2-2		Fndc3a
Ado		Clk3
Itga4		Cpsf7
Speg		Taf8
Actr2		Gm11837
Atp11c		Ccdc84
Ankrd35		Parp4
Peli1		Phf7
Plag1		Trem2
Tle4		Arhgef25
Ash2l		AA415398
Tom1		2310067B10Rik
P2rx7		A330023F24Rik
Nostrin		Cxcl9
Lax1		Zfp747
Kat5		Pan2
Wdr1		Svep1
Pon1		Ptprj
Thy1		Trip10
Vat1l		Palm3
Gpr176		Cradd
Rhov		Ndrg2
Wdr37		Slc35a1
Slc6a8		Men1
Cybb		Ppp4r4
Gli3		C030034L19Rik
Iglc2		Samm50
Tnxb		Ddb2
Anxa4		Rasgrf1
Rnf180		Gm15883
Fkbp1b		Mta2
Snx1		Il17rb
Tdp2		Cd74
St8sia4		1700024P16Rik
Apoa1		Sall2
Serpinb9b		Fmo1
Snx29		Snord123
Rps15a		Hoxa3
4632404H12Rik		Glt8d2
Yipf7		Casp7
Pygo1		Prpf38b
Rnase4		Ctf1
Hvcn1		Tap1
Ahsg		Fbrs
Cep250		Rce1
A230028O05Rik		Asphd1
Dhx34		Amt
Ncf4		Zbtb37
Stard3		Rai2
Hexb		Fendrr
Slamf7		Gm11744
Manba		Spice1
Gtl3		Igfbp7
4932438H23Rik		Kazald1
Cps1		Rere
Basp1		Ing5
Rgs18		Hsd3b7
Sdcbp		Trp53i13
Ap1s3		Pacsin3
Rufy3		Sntg2
Tgfbr1		Gm4673
Cml2		Cd7
Ctns		Vwa1
Oas3		Slc16a7
Enpp1		Snx32
Snrpb2		Hyal2
Apoh		6030408B16Rik
Prss12		Slc11a1
Rasgef1a		Rnf144b
Tlr11		Stra6
Arpc5		Zfp444
Rpl10		Nnat
2010001K21Rik		Alad
Crlf2		Slc1a3
Cfh		C630043F03Rik
Hnrnpd		Gm15417
Il33		Megf10
Il1rl1		Baz2b
Mup3		Fbxo7
Ago4		Pwwp2a
Rpl35a		9330151L19Rik
Hgsnat		Fam120aos
Ldlrap1		Art3
Osm		Rad9b
Nfya		Uckl1
Cpt1c		Tmem26
Colec12		Phf1
Tespa1		Cobll1
2001-09-01		Reps2
Aim2		Dguok
Sptssa		Usp54
Zfp951		Gnal
Slc24a5		A430071A18Rik
U2af1		Sf1
Cenpj		Cnksr3
Ctdp1		Golgb1
Hmgn1		Slc9a1
Nfasc		Slc20a2
Lair1		H6pd
Hdc		Gm10524
Kif1a		9330162012Rik
Lpcat1		Midn
Igkv6-15		Arl10
Csf2rb2		Zdhhc1
Uchl1		A930033H14Rik
Afp		Sdc1
Dhrs9		Pik3ap1
Gpr85		Galm
Hs6st2		Izumo4
Ms4a6b		Hic2
Eif5a2		Shc1
Ddx41		Phf21a
Gfpt2		Bco2
Actr3		5031434O11Rik
2410016O06Rik		Retsat
Tusc1		Prps1
Acap1		Klre1
Cnot6		Wdr34
Gcsam		Ttyh1
Ikzf3		Zfp512
A530099J19Rik		Stab1
Dpysl3		Hs3st6
Car13		Cxxc5
Myb		Hic1
Antxr1		Eva1c
Mogs		Pde1a
Phf15		Prr12
Cxcl10		Timm21
Ankrd55		Atp5sl
Ptprc		Btbd2
Evl		C4b
Zfp709		Zfp157
Vamp4		4930546H06Rik
Pgap1		Ivns1abp
BC005537		Cxxc1
Elp2		Zfp707
Zfp71-rs1		Prpsap1
Il21r		Thap3
Ighv7-3		Zscan12
Alpk1		Pgm3
Gm15411		Myh2
Vps16		Syt3
Stap1		Gm9920
Slc38a4		Mtag2
Fstl1		Smad5
Rps10		Clec4a2
Xylt1		H2-Q4
Fam111a		Cnot3
Zcchc4		Rgs4
Gm9796		Cblb
Serpina1b		Sqrdl
Flnc		Ccdc62
B430305J03Rik		Mbtd1
5031414D18Rik		Fn3k
Man2c1		Gm15545
Snx8		Inpp5k
Osbpl8		Ncoa1
Snrpd1		Pi4kb
Adamts15		Gltscr2
Igkv14-126		4930581F22Rik
Lhx9		Ebf4
Mier2		Zfp358
Map1s		Cic
Rragd		Neat1
Ptprcap		Mfsd10
Slc23a2		Sema6a
Hmgcl		Cul7
Mef2a		Parp14
Stac2		Gstp2
Ctsg		Peli2
Scrn1		Cdkn1b
Rps3		C230035I16Rik
Rhoh		Slc38a6
Tmem25		Alpk3
Atp6v1c1		Cd209g
Pip4k2a		Ddx39b
Papd4		Zfp777
N4bp2		Rpain
Prdx1		Plekhg3
Comp		Gm9992
Celf4		Gm4285
Kcnip3		Slc17a7
Pou2af1		Trim39
Mfap5		Ppm1b
Unc13d		Khsrp
Bcas2		Klf3
Cep110		Cd300lb
Galns		Rn7sk
Anxa11		Ppp1r15b
Rps25		2010016I18Rik
Map3k1		Ush1g
Syngap1		Plekha5
Cd5		Hspa2
Vwa5a		Terf2
Zfx		Alas2
Acss1		Fbxo10
Cpa3		Lyz1
Scly		Cdk2
Nmt2		Aard
Dgkz		1700029J07Rik
Blnk		Khnyn
Wnt4		Pld2
Smc5		Sox12
Gucy2e		Gm14378
Ankrd13b		Znfx1
Ptma		Pcif1
Cd248		Hcn2
Ahnak2		P2rx1
Ddx60		Pla2g2d
Pacsin1		BC005764
Wdr96		Grhpr
Dpp7		Acsm5
Ncapd2		Ctso
Vopp1		Myl9
Tubb5		Irf4
Slc25a12		Ctnnd1
Zfp263		Cd163l1
Gna13		Gm16168
Mis18bp1		AI480526
AI413582		Gtpbp6
Prrx2		Prdm2
Zfp810		Crebzf
Myh15		Shf
Vbp1		5430416N02Rik
Plxna4		Brpf1
Usf1		Paqr4
Smap2		Gpr157
Abcc3		Irf2
Atp11b		Dtna
Slc17a8		Id1
Zfp945		Slco2a1
Larp6		5830403L16Rik
Gm8995		Gm11205
Isg15		Gm17334
Mroh1		Asb2
Fabp1		Nfxl1
Gm8369		St3gal6
Prkcb		Adamts1
Nlrc3		Zfp809
Gc		Tmem178b
Serpinb6b		Sfxn1
Vrk2		Gm5699
Pde1c		Gm9885
Wipf1		Ip6k1
Icam1		Klf4
Mcm9		Suv39h1
Nbl1		Cacna1c
Chst11		Galnt11
Ier5l		Tctn2
Zfp831		Mbd6
Saa1		Gm13375
Gimap3		Siah1a
Slc9a3r1		Lamb1
Rap1b		Sh3glb2
Igsf9		Gm2415
Ubash3b		Gm20522
Fermt3		Phf13
Igkv8-27		Ces1f
Abcb4		Col27a1
P2ry10		Suclg2
Itpr3		Amigo2
Ppp1cc		Efhd2
Enpp6		Gmfg
Clec7a		Klhl36
Slc18a2		Slc26a8
Zfml		Ubb
Ptk7		Mroh7
Lix1l		9430008C03Rik
Cd3d		Fam98c
Iqgap1		D930048N14Rik
Hgf		Nphp1
B3gnt8		Angptl2
Tlr4		Gigyf1
Sec11c		C2
Gbp8		Dennd2a
Ncf1		Gapdhs
Sell		Naaa
Mettl17		Aqp1
P4htm		Ppox
Igf2bp2		Ddx19b
Fuca1		Rgag4
Trnp1		S100a1
Ugdh		Fbxo21
Pold1		Jup
Ints9		G630016G05Rik
Siglec15		Trp53bp1
Zfp830		Bckdhb
Nkd2		Rsph9
Fkbp10		9230116N13Rik
Cyp4f39		Ebf2
Hcls1		Ccdc174
Exosc8		Clvs1
Got2		Ikbkb
AI314831		Prokr1
Fhdc1		Gsc
Hexa		Pdilt
Lat2		Cxcl14
Nr1h4		Gpr182
Rnf128		Dpep1
Ighv9-3		Eno3
R3hdm1		B230398E01Rik
Cln6		Slx1b
Frk		Mrc1
Foxo3		Dalrd3
Pcdhb9		Agpat6
Rps4x		Gm9828
Cd200r4		Isg20
Gm22753		Wdr62
Tmem164		Bbs2
Atp8b5		1110037F02Rik
Ehd4		Setd1a
Wdr91		Hrct1
4632428N05Rik		Lrrn1
Ube2l6		Nupr1l
Haghl		Sult5a1
Pnmal2		Fads6
Rpl3		Glis1
Plg		Mettl6
Ankdd1a		Tacc2
B3gnt9		Ppl
Ctsk		Hpcal1
Arpc4		Csf1r
Ptpn7		Gpx1
Phf23		Shroom3
Cyba		Rnf169
Zfp286		Klhdc9
Vipas39		Lzts2
Itga2b		B130011K05Rik
Dlg3		Txnip
Tnni3		Tpm2
Hmga2		Atxn2l
Cd53		Adc
Lum		Clu
Fga		Prkd2
Rbl1		Hddc3
Trpm4		Camta2
Fam129b		C630016N16Rik
B230378P21Rik		Lhfpl4
Rac2		Wipf2
Fem1b		Pced1b
Tm6sf1		Ntrk3
Rcbtb1		Rem1
Nes		Slc2a3
Kdelc2		Pde4dip
Nceh1		Amotl2
Ccdc88b		Hmg20a
Tctex1d2		Smoc1
Grn		Hivep3
Tmem71		Gm27003
Igj		Zbtb5
Cxcl16		Card14
Stx3		Glb1l
Mgp		Aoah
Brwd1		Zyx
Sap30		Amph
Cttnbp2nl		Lrrc47
Scyl2		Pcf11
Stx7		Tmem231
Chtf18		Pdia4
Dhps		E130102H24Rik
Stxbp1		Ccdc8
Irak4		4930458D05Rik
Ttr		Foxf1
Gria3		Rabep2
Capn6		Anpep
Mamld1		Clec10a
Myo1e		Mrvi1
Nlrp10		Chrne
Serpinc1		Gabbr1
Ifitm10		Zfp235
Rab31		Tcf7l2
Rasal1		Sirt6
Aldob		4831440E17Rik
Serpina3k		Card10
Ighv11-2		9130230N09Rik
Lhfp		Cited2
Slc39a6		Gstt4
Milr1		Pilrb1
Tmem251		E030030I06Rik
Enoph1		Rimkla
Nrn1		Rbmx
Igkv3-12		Klra7
Gla		1700023L04Rik
Tbc1d9		A530020G20Rik
Abca7		Chrd
Ly6d		Scn1b
Igsf3		Ncam2
Rrm1		Bid
Gm11843		Snrnp70
Blk		Clk4
Tgfbr2		Trim65
Cpq		Dlk1
Cd276		2900052L18Rik
Ms4a4b		Mafb
Hk1		Arxes2
Psd3		Shisa2
Pdgfrl		Gmds
Lrrn3		Ptger2
Guf1		Tnip1
Dnajc6		Sema5a
Foxp2		Unc5c
Tbc1d10a		E330013P04Rik
Ipcef1		Supt20
Scaf8		Zfp36
Crlf3		Fam188b
Trim7		Osbpl11
Rps18		Sdccag8
Itih4		Sfrs18
Tes		Blcap
Pan3		Has2os
Crip1		Lor
Fgfbp3		Fnbp1
Lpcat2		Fam13a
BC028528		Mau2
Pik3cd		Rorc
Arrdc1		Dnase1l2
Bri3bp		Inmt
Lrrk1		4930412C18Rik
Dnmt3a		Zcchc8
Cyb561d1		Scara5
Arid3a		Chrm3
Rpl12		Maob
Cdc42se2		Cxcl12
Ywhah		C5ar1
Ccsap		Stim1
Cotl1		St6galnac5
2010111I01Rik		Pddc1
Tuba1c		Stat5b
Cd37		Grik5
Fgd3		Il6ra
Ccdc152		Colec11
Lat		Trit1
Rin2		Arhgap39
Ctsw		Itpka
Serpinb1c		Crebbp
Scml4		Gdf2
Ogfrl1		Marveld1
		Ngfr
		Slc22a18
		Arhgap36
		St3gal4
		Ell
		Adssl1
		Sec16b
		Atoh8
		Dpep3
		Zcchc7
		E330009J07Rik
		Acvrl1
		Zfp683
		Zcchc11
		Pabpn1
		Gnao1
		Fbxw9
		B330016D10Rik
		Dtx3
		Cd27
		Lman2l
		Tesk2
		Ccnl1
		Ms4a4d
		Adamtsl1
		Gm20539
		Hrc
		Phf12
		Safb2
		Pld4
		Aldh9a1
		Sgsm2
		H2-T10
		Hp1bp3
		Usp35
		Rassf4
		Cytl1
		2010106E10Rik
		Ppap2c
		Akap8l
		Taz
		Ager
		Actg2
		Acad10
		Tctn1
		Ankrd16
		Inppl1
		Pard6g
		Ace
		Bcat2
		Brinp1
		Rnf114
		Clasrp
		Hif3a
		Syne2
		Tcp11l2
		1010001B22Rik
		Gm16892
		KCTD12
		Zfp775
		Trim32
		4930481A15Rik
		Gm21887
		Prg2
		Fbxl12
		Sephs2
		S1pr3
		Lcn8
		Exoc3l2
		Drp2
		Bzw2
		Mapk1ip1
		Mgst1
		F3
		Edc3
		Gata2
		2006-09-01
		1810010H24Rik
		Ctps2
		Cast
		Gzf1
		Gm10030
		Trrap
		Crtc2
		Bcl2l11
		Sult1e1
		E4f1
		Clk1
		Bsdc1
		Tmem134
		Ddx17
		Cfp
		Gpx3
		Zscan26
		2310010J17Rik
		Tnrc18
		Fbxo38
		Elane
		Cadps2
		Phyhd1
		Nckap5l
		Fbxo44
		Irf7
		Sema6c
		Steap4
		Cd86
		Leng8
		Myh11
		Slc37a2
		Shisa9
		Rhbdl1
		Klk10
		Ddhd1
		Dock9
		Kdm5b
		Hspa1b
		Slc16a9
		Snhg9
		n-R5-8s1
		Rhbdf2
		Cd68
		Prr24
		Clcf1
		Lrrtm3
		Ubald2
		Zyg11a
		Adrb3
		Numbl
		Dgka
		Wdr24
		Fblim1
		Pid1
		Col6a5
		Poli
		Gm12992
		Slc46a3
		4930500J02Rik
		Gm6297
		Katnal2
		Mettl7a1
		Net1
		Tbx6
		Gm26532
		Cryzl1
		Vstm2b
		Bdh2
		2700081O15Rik
		Nckap1l
		Rnf31
		Fxyd7
		Hs3st3b1
		Gm11131
		Setdb1
		Polr3gl
		Mat2a
		Phldb1
		Tmem43
		1300002E11Rik
		Srsf4
		0610007N19Rik
		Mrpl45
		Gstt2
		Grip2
		Zbtb34
		Gm26889
		Sfswap
		Zfp174
		2810407A14Rik
		Gm16973
		Mib2
		Tenc1
		Jph2
		Chrdl1
		Lrig3
		Tmem159
		Spic
		Gdf10
		Enpp2
		Gm12279
		Mmp17
		Xpc
		Map3k12
		Abca8a
		Elac1
		Dact3
		Nrf1
		Zhx2
		Uhrf1bp1l
		Btrc
		Steap2
		Smim19
		Aldh2
		D4Wsu53e
		Zcchc14
		Vmo1
		Prox2
		Cfd
		Clec4a1
		Fam124a
		Acp5
		Ggnbp1
		Slc29a1
		Pitpnc1
		Gm11602
		Gm7061
		Prr14
		Gdpd3
		Sox7
		Nlrc4
		1700055D18Rik
		Csnk1e
		Taf1a
		Kalrn
		Ripk4
		Slc9b2
		Sepp1
		Bmf
		Zfp110
		Gm12359
		Kdm2a
		Dhx57
		Agt
		Cyp27a1
		Fbxo31
		Slc4a11
		Penk
		Il2rb
		Pde11a
		Ube2i
		Vmac
		Epc1
