# Supplementary figures and images for: Adipocyte NR1D1 dictates adipose tissue expansion during obesity
Source: eLife journal article supplement (doi:10.7554/elife.63324), 2021-08-05

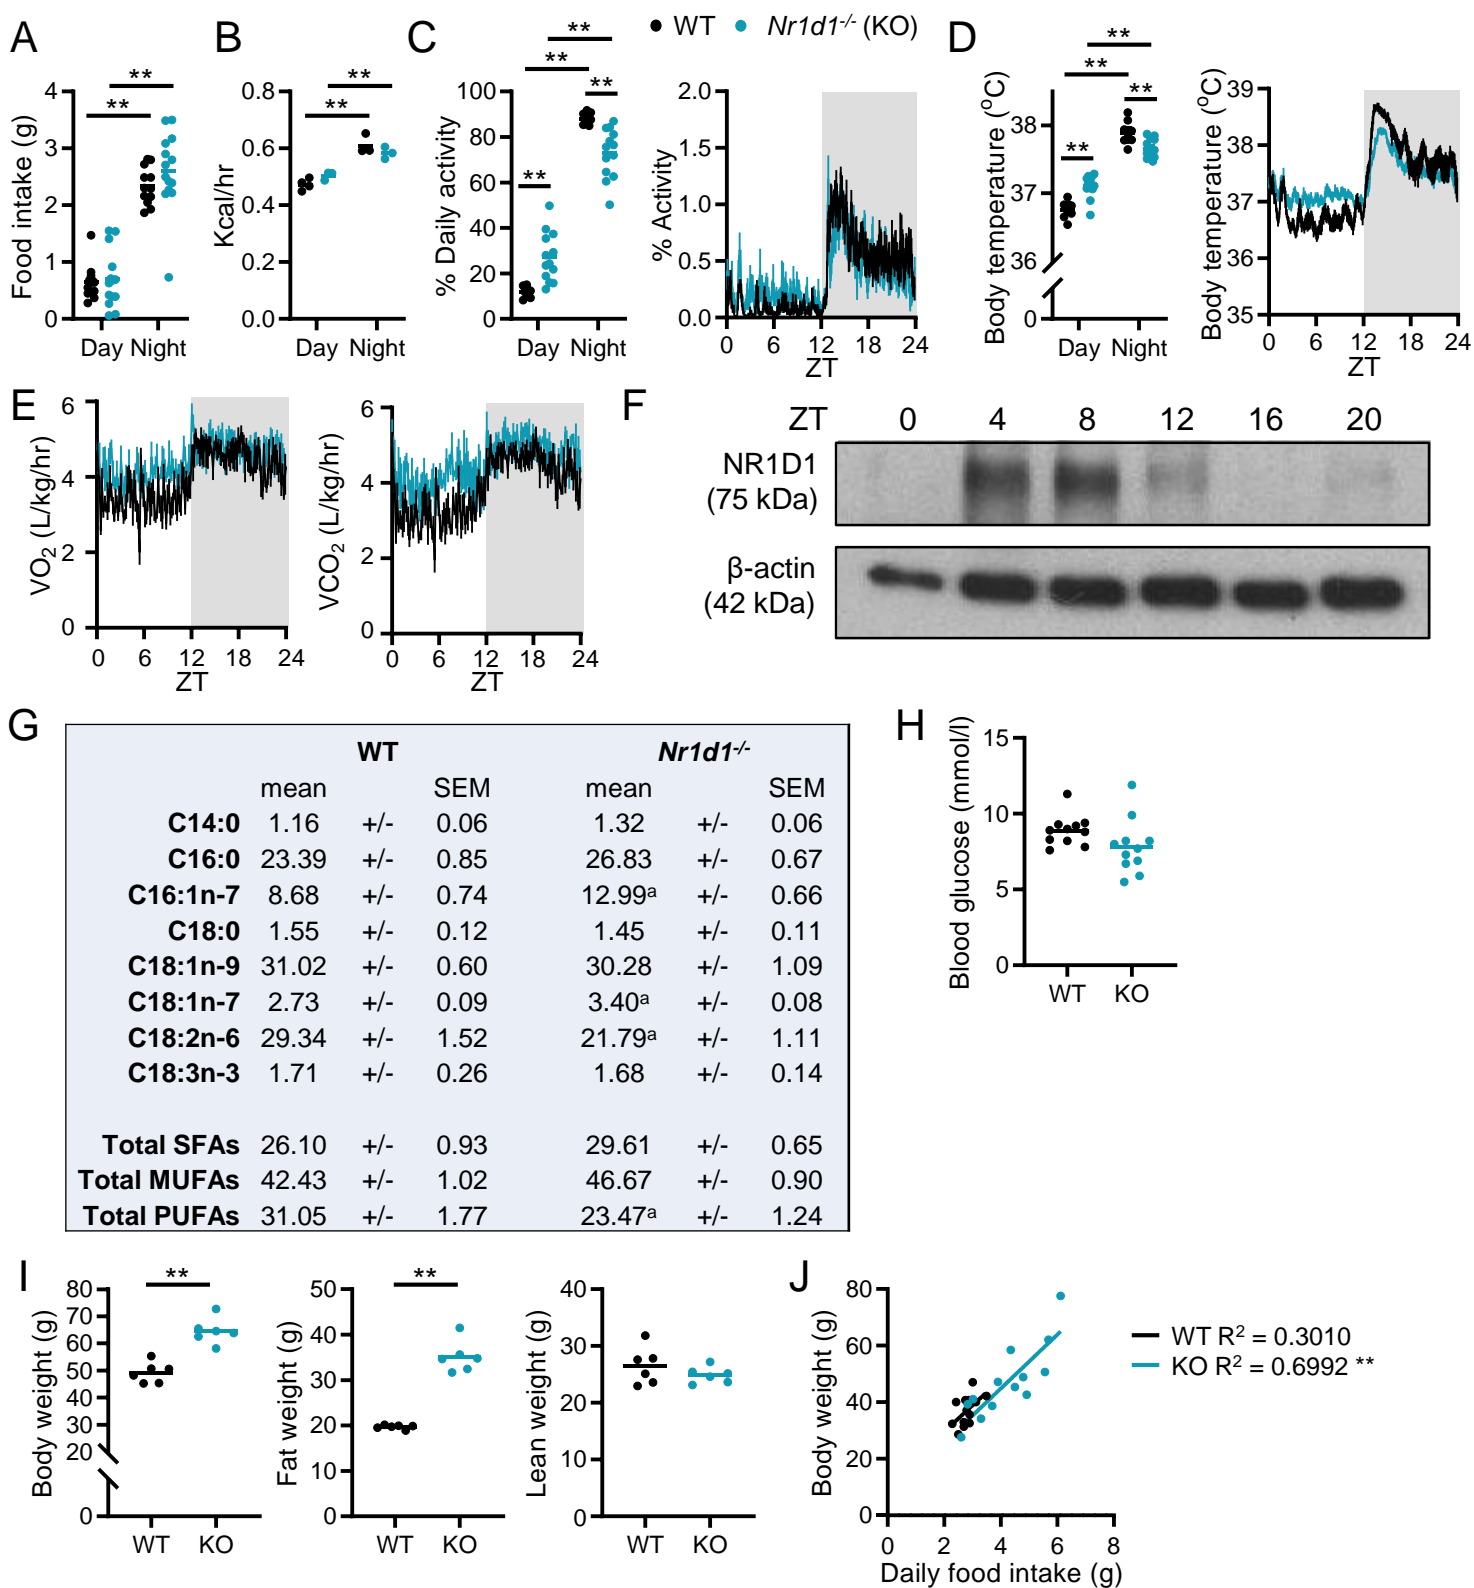

Supplement: supp [file elife_poa_e63324_Figure_1_figure_supplement_1.pdf › elife_poa_e63324_Figure_1_figure_supplement_1.pdf]

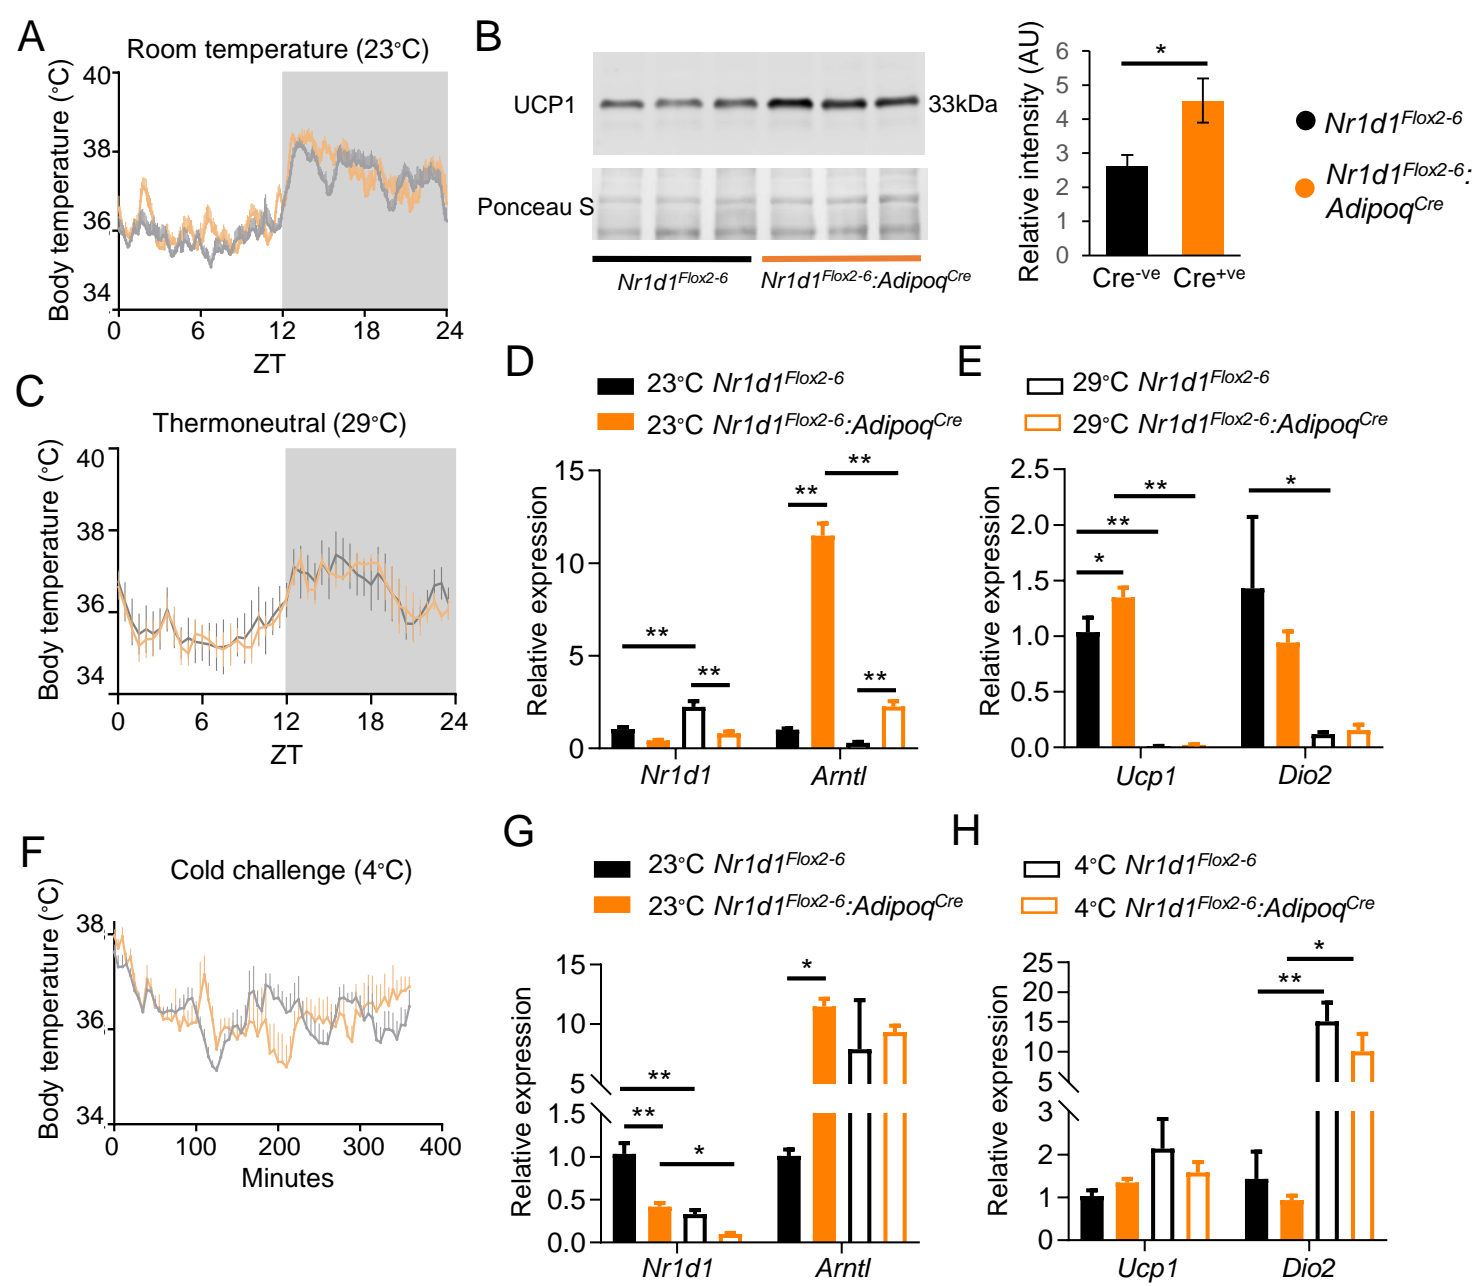

Supplement: supp [file elife_poa_e63324_Figure_2_figure_supplement_1.pdf › elife_poa_e63324_Figure_2_figure_supplement_1.pdf]

**A**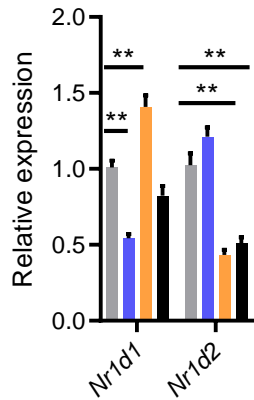**B**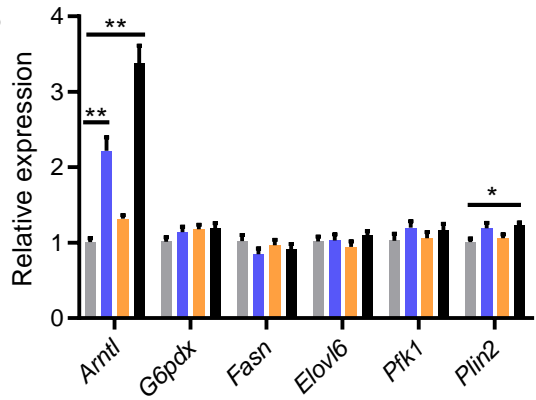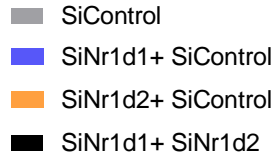

Supplement: supp [file elife_poa_e63324_Figure_3_figure_supplement_1.pdf › elife_poa_e63324_Figure_3_figure_supplement_1.pdf]

A

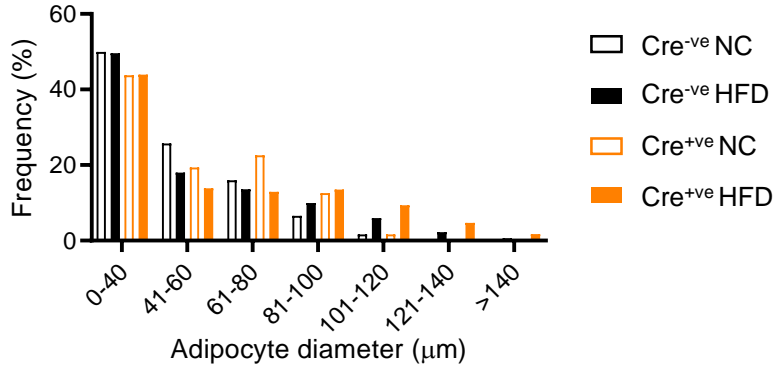

B

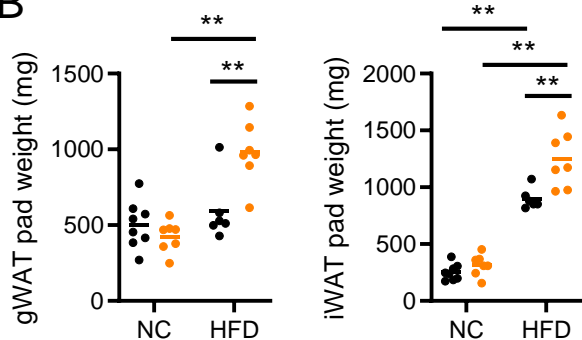

Supplement: supp [file elife_poa_e63324_Figure_4_figure_supplement_1.pdf › elife_poa_e63324_Figure_4_figure_supplement_1.pdf]

A

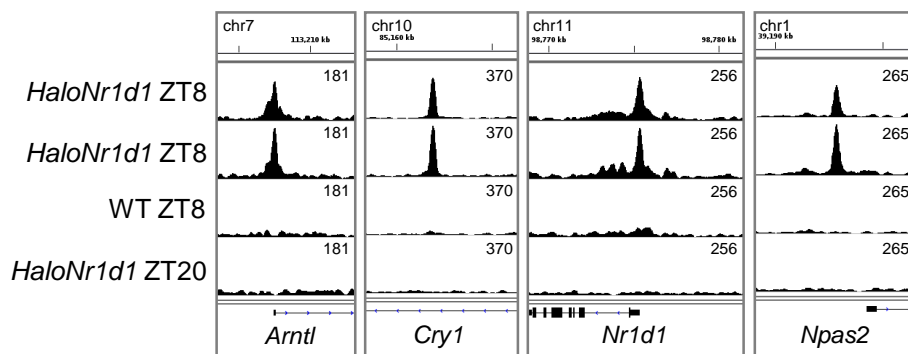

B

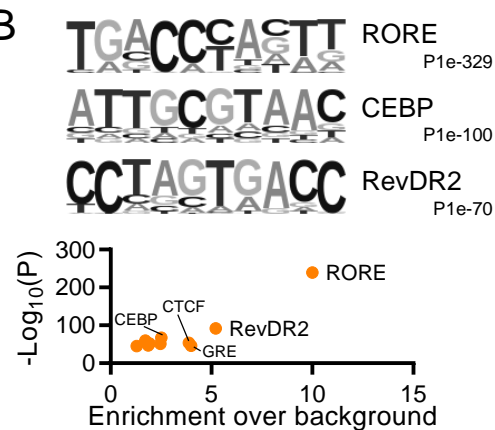

C

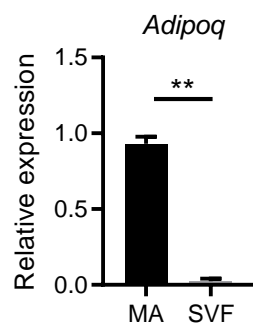

D

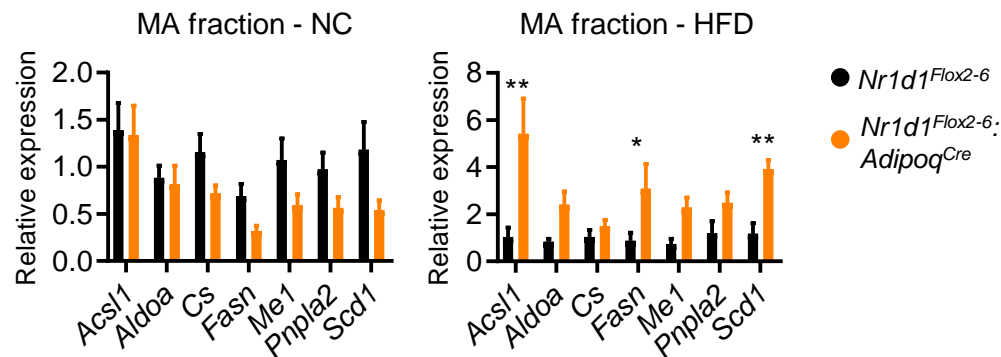

E

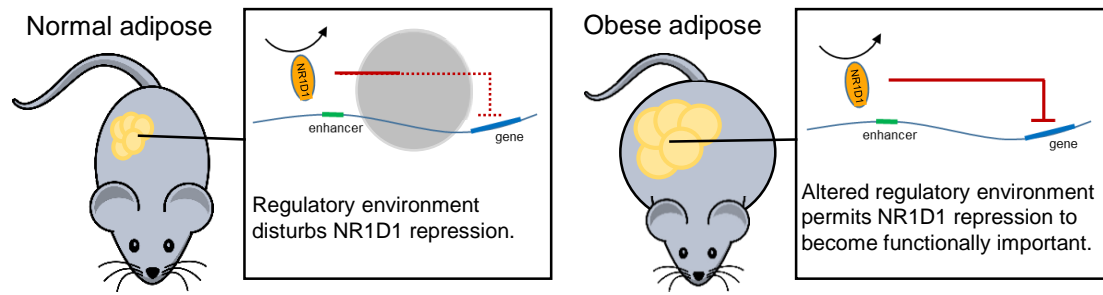

Supplement: supp [file elife_poa_e63324_Figure_6_figure_supplement_1.pdf › elife_poa_e63324_Figure_6_figure_supplement_1.pdf]
